# Supplementary material for: LinkPred: a high performance library for link prediction in complex networks
Source: PeerJ journal article supplement (doi:10.7717/peerj-cs.521), 2021-05-21
Supplement: LinkPred.zip [file LinkPred.zip]

LinkPred

..

Generated by Doxygen 1.8.17



|                                                                                       |           |
|---------------------------------------------------------------------------------------|-----------|
| <b>1 LinkPred: A high performance library for link prediction in complex networks</b> | <b>1</b>  |
| <b>2 Module Index</b>                                                                 | <b>3</b>  |
| 2.1 Modules . . . . .                                                                 | 3         |
| <b>3 Namespace Index</b>                                                              | <b>5</b>  |
| 3.1 Namespace List . . . . .                                                          | 5         |
| <b>4 Hierarchical Index</b>                                                           | <b>7</b>  |
| 4.1 Class Hierarchy . . . . .                                                         | 7         |
| <b>5 Class Index</b>                                                                  | <b>11</b> |
| 5.1 Class List . . . . .                                                              | 11        |
| <b>6 File Index</b>                                                                   | <b>17</b> |
| 6.1 File List . . . . .                                                               | 17        |
| <b>7 Module Documentation</b>                                                         | <b>23</b> |
| 7.1 Core classes . . . . .                                                            | 23        |
| 7.1.1 Detailed Description . . . . .                                                  | 23        |
| 7.2 Graph algorithms. . . . .                                                         | 24        |
| 7.2.1 Detailed Description . . . . .                                                  | 24        |
| 7.3 Machine learning classes . . . . .                                                | 25        |
| 7.3.1 Detailed Description . . . . .                                                  | 25        |
| 7.4 Numerical classes and algorithms . . . . .                                        | 26        |
| 7.4.1 Detailed Description . . . . .                                                  | 26        |
| 7.5 Performance evaluation classes . . . . .                                          | 27        |
| 7.5.1 Detailed Description . . . . .                                                  | 27        |
| 7.6 Link prediction algorithms . . . . .                                              | 28        |
| 7.6.1 Detailed Description . . . . .                                                  | 29        |
| 7.7 Simplified interface . . . . .                                                    | 30        |
| 7.7.1 Detailed Description . . . . .                                                  | 30        |
| 7.8 Utility functions and classes . . . . .                                           | 31        |
| 7.8.1 Detailed Description . . . . .                                                  | 31        |
| <b>8 Namespace Documentation</b>                                                      | <b>33</b> |
| 8.1 LinkPred Namespace Reference . . . . .                                            | 33        |
| 8.1.1 Detailed Description . . . . .                                                  | 38        |
| 8.1.2 Typedef Documentation . . . . .                                                 | 38        |
| 8.1.2.1 PerfResults . . . . .                                                         | 39        |
| 8.1.3 Enumeration Type Documentation . . . . .                                        | 39        |
| 8.1.3.1 CacheLevel . . . . .                                                          | 39        |
| 8.1.3.2 LinkClass . . . . .                                                           | 39        |
| 8.1.3.3 LogLevel . . . . .                                                            | 39        |
| 8.1.3.4 MDSAAlg . . . . .                                                             | 40        |

|                                         |    |
|-----------------------------------------|----|
| 8.1.3.5 SortOrder                       | 40 |
| 8.1.4 Function Documentation            | 40 |
| 8.1.4.1 operator*() [1/3]               | 40 |
| 8.1.4.2 operator*() [2/3]               | 42 |
| 8.1.4.3 operator*() [3/3]               | 42 |
| 8.1.4.4 operator+() [1/3]               | 43 |
| 8.1.4.5 operator+() [2/3]               | 43 |
| 8.1.4.6 operator+() [3/3]               | 43 |
| 8.1.4.7 operator-() [1/3]               | 44 |
| 8.1.4.8 operator-() [2/3]               | 44 |
| 8.1.4.9 operator-() [3/3]               | 44 |
| 8.1.4.10 operator/() [1/3]              | 45 |
| 8.1.4.11 operator/() [2/3]              | 45 |
| 8.1.4.12 operator/() [3/3]              | 46 |
| 8.1.4.13 operator^()                    | 46 |
| 8.1.5 Variable Documentation            | 46 |
| 8.1.5.1 MathPI                          | 46 |
| 8.2 LinkPred::Simp Namespace Reference  | 47 |
| 8.2.1 Detailed Description              | 47 |
| 8.3 LinkPred::Utils Namespace Reference | 47 |
| 8.3.1 Detailed Description              | 48 |
| 8.3.2 Function Documentation            | 48 |
| 8.3.2.1 assertNoNaN()                   | 49 |
| 8.3.2.2 clear()                         | 49 |
| 8.3.2.3 filter()                        | 49 |
| 8.3.2.4 flip()                          | 49 |
| 8.3.2.5 flipMap()                       | 50 |
| 8.3.2.6 getRandom()                     | 50 |
| 8.3.2.7 getRndPerm() [1/2]              | 50 |
| 8.3.2.8 getRndPerm() [2/2]              | 51 |
| 8.3.2.9 int_cast()                      | 51 |
| 8.3.2.10 localRange()                   | 51 |
| 8.3.2.11 ltrim()                        | 51 |
| 8.3.2.12 norm()                         | 52 |
| 8.3.2.13 pIFit() [1/2]                  | 52 |
| 8.3.2.14 pIFit() [2/2]                  | 52 |
| 8.3.2.15 print() [1/3]                  | 53 |
| 8.3.2.16 print() [2/3]                  | 53 |
| 8.3.2.17 print() [3/3]                  | 53 |
| 8.3.2.18 printEdges() [1/2]             | 54 |
| 8.3.2.19 printEdges() [2/2]             | 54 |
| 8.3.2.20 readEdges()                    | 54 |

|                                                                                           |           |
|-------------------------------------------------------------------------------------------|-----------|
| 8.3.2.21 readEdgeScores()                                                                 | 54        |
| 8.3.2.22 rtrim()                                                                          | 55        |
| 8.3.2.23 selectRandom()                                                                   | 55        |
| 8.3.2.24 selectRandomInPlace()                                                            | 56        |
| 8.3.2.25 selectTopK()                                                                     | 56        |
| 8.3.2.26 shuffle()                                                                        | 56        |
| 8.3.2.27 sort()                                                                           | 57        |
| 8.3.2.28 trim()                                                                           | 57        |
| 8.3.2.29 writeEdgeScores()                                                                | 57        |
| <b>9 Class Documentation</b>                                                              | <b>59</b> |
| 9.1 LinkPred::ASPDistCalculator< Network, DistType, NbHopsType > Class Template Reference | 59        |
| 9.1.1 Detailed Description                                                                | 60        |
| 9.1.2 Member Typedef Documentation                                                        | 61        |
| 9.1.2.1 Edge                                                                              | 61        |
| 9.1.2.2 EdgeLengthMap                                                                     | 61        |
| 9.1.2.3 EdgeLengthMapSP                                                                   | 61        |
| 9.1.2.4 Label                                                                             | 61        |
| 9.1.2.5 LengthMapIdType                                                                   | 62        |
| 9.1.2.6 NetworkSP                                                                         | 62        |
| 9.1.2.7 NodeDistMap                                                                       | 62        |
| 9.1.2.8 NodeDistMapSP                                                                     | 62        |
| 9.1.2.9 NodeID                                                                            | 62        |
| 9.1.3 Constructor & Destructor Documentation                                              | 62        |
| 9.1.3.1 ASPDistCalculator() [1/3]                                                         | 62        |
| 9.1.3.2 ASPDistCalculator() [2/3]                                                         | 63        |
| 9.1.3.3 ASPDistCalculator() [3/3]                                                         | 63        |
| 9.1.3.4 ~ASPDistCalculator()                                                              | 63        |
| 9.1.4 Member Function Documentation                                                       | 63        |
| 9.1.4.1 getDist() [1/2]                                                                   | 64        |
| 9.1.4.2 getDist() [2/2]                                                                   | 64        |
| 9.1.4.3 getIndDist()                                                                      | 64        |
| 9.1.4.4 operator=() [1/2]                                                                 | 65        |
| 9.1.4.5 operator=() [2/2]                                                                 | 65        |
| 9.1.4.6 setLandmarks()                                                                    | 65        |
| 9.2 LinkPred::ASPDsimCalculator< Network, DsimType, NbHopsType > Class Template Reference | 66        |
| 9.2.1 Detailed Description                                                                | 67        |
| 9.2.2 Member Typedef Documentation                                                        | 67        |
| 9.2.2.1 Edge                                                                              | 67        |
| 9.2.2.2 EdgeLengthMap                                                                     | 68        |
| 9.2.2.3 EdgeLengthMapSP                                                                   | 68        |
| 9.2.2.4 Label                                                                             | 68        |

|                                                                                          |    |
|------------------------------------------------------------------------------------------|----|
| 9.2.2.5 LengthMapIdType . . . . .                                                        | 68 |
| 9.2.2.6 NetworkSP . . . . .                                                              | 68 |
| 9.2.2.7 NodeDsimMap . . . . .                                                            | 69 |
| 9.2.2.8 NodeDsimMapSP . . . . .                                                          | 69 |
| 9.2.2.9 NodeID . . . . .                                                                 | 69 |
| 9.2.3 Constructor & Destructor Documentation . . . . .                                   | 69 |
| 9.2.3.1 ASPDsimCalculator() [1/3] . . . . .                                              | 69 |
| 9.2.3.2 ASPDsimCalculator() [2/3] . . . . .                                              | 70 |
| 9.2.3.3 ASPDsimCalculator() [3/3] . . . . .                                              | 70 |
| 9.2.3.4 ~ASPDsimCalculator() . . . . .                                                   | 70 |
| 9.2.4 Member Function Documentation . . . . .                                            | 70 |
| 9.2.4.1 getDist() [1/2] . . . . .                                                        | 70 |
| 9.2.4.2 getDist() [2/2] . . . . .                                                        | 71 |
| 9.2.4.3 getIndDist() . . . . .                                                           | 71 |
| 9.2.4.4 operator=() [1/2] . . . . .                                                      | 72 |
| 9.2.4.5 operator=() [2/2] . . . . .                                                      | 72 |
| 9.2.4.6 setLandmarks() . . . . .                                                         | 72 |
| 9.3 LinkPred::BFS< Network, NodeProcessor > Class Template Reference . . . . .           | 73 |
| 9.3.1 Detailed Description . . . . .                                                     | 74 |
| 9.3.2 Constructor & Destructor Documentation . . . . .                                   | 74 |
| 9.3.2.1 BFS() [1/3] . . . . .                                                            | 74 |
| 9.3.2.2 BFS() [2/3] . . . . .                                                            | 74 |
| 9.3.2.3 BFS() [3/3] . . . . .                                                            | 74 |
| 9.3.2.4 ~BFS() . . . . .                                                                 | 75 |
| 9.3.3 Member Function Documentation . . . . .                                            | 75 |
| 9.3.3.1 operator=() [1/2] . . . . .                                                      | 75 |
| 9.3.3.2 operator=() [2/2] . . . . .                                                      | 75 |
| 9.3.3.3 traverse() . . . . .                                                             | 76 |
| 9.4 LinkPred::BHeap< T, P, ComparatorT, ComparatorP > Class Template Reference . . . . . | 76 |
| 9.4.1 Detailed Description . . . . .                                                     | 77 |
| 9.4.2 Constructor & Destructor Documentation . . . . .                                   | 78 |
| 9.4.2.1 BHeap() [1/3] . . . . .                                                          | 78 |
| 9.4.2.2 BHeap() [2/3] . . . . .                                                          | 78 |
| 9.4.2.3 BHeap() [3/3] . . . . .                                                          | 78 |
| 9.4.2.4 ~BHeap() . . . . .                                                               | 79 |
| 9.4.3 Member Function Documentation . . . . .                                            | 79 |
| 9.4.3.1 contains() . . . . .                                                             | 79 |
| 9.4.3.2 decrease() . . . . .                                                             | 79 |
| 9.4.3.3 increase() . . . . .                                                             | 80 |
| 9.4.3.4 operator=() [1/2] . . . . .                                                      | 80 |
| 9.4.3.5 operator=() [2/2] . . . . .                                                      | 80 |
| 9.4.3.6 pop() . . . . .                                                                  | 81 |

|                                                                                    |    |
|------------------------------------------------------------------------------------|----|
| 9.4.3.7 print()                                                                    | 81 |
| 9.4.3.8 push()                                                                     | 81 |
| 9.4.3.9 set()                                                                      | 81 |
| 9.4.3.10 size()                                                                    | 82 |
| 9.4.3.11 top()                                                                     | 82 |
| 9.4.3.12 tryDecrease()                                                             | 82 |
| 9.4.3.13 tryIncrease()                                                             | 83 |
| 9.5 LinkPred::Bhmap< K, P, Comparator > Class Template Reference                   | 83 |
| 9.5.1 Detailed Description                                                         | 84 |
| 9.5.2 Member Typedef Documentation                                                 | 84 |
| 9.5.2.1 k_const_iterator                                                           | 84 |
| 9.5.2.2 p_const_iterator                                                           | 84 |
| 9.5.3 Constructor & Destructor Documentation                                       | 84 |
| 9.5.3.1 Bhmap() [1/3]                                                              | 84 |
| 9.5.3.2 Bhmap() [2/3]                                                              | 85 |
| 9.5.3.3 Bhmap() [3/3]                                                              | 85 |
| 9.5.3.4 ~Bhmap()                                                                   | 85 |
| 9.5.4 Member Function Documentation                                                | 85 |
| 9.5.4.1 insert()                                                                   | 85 |
| 9.5.4.2 kbegin()                                                                   | 86 |
| 9.5.4.3 kend()                                                                     | 86 |
| 9.5.4.4 key()                                                                      | 86 |
| 9.5.4.5 kfind()                                                                    | 86 |
| 9.5.4.6 operator=() [1/2]                                                          | 87 |
| 9.5.4.7 operator=() [2/2]                                                          | 87 |
| 9.5.4.8 pbegin()                                                                   | 87 |
| 9.5.4.9 pend()                                                                     | 88 |
| 9.5.4.10 pfind()                                                                   | 88 |
| 9.5.4.11 pos()                                                                     | 88 |
| 9.5.4.12 size()                                                                    | 88 |
| 9.6 LinkPred::Classifier< InRndIt, OutRndIt, ScoreRndIt > Class Template Reference | 89 |
| 9.6.1 Detailed Description                                                         | 89 |
| 9.6.2 Constructor & Destructor Documentation                                       | 89 |
| 9.6.2.1 Classifier() [1/3]                                                         | 89 |
| 9.6.2.2 Classifier() [2/3]                                                         | 90 |
| 9.6.2.3 Classifier() [3/3]                                                         | 90 |
| 9.6.2.4 ~Classifier()                                                              | 90 |
| 9.6.3 Member Function Documentation                                                | 90 |
| 9.6.3.1 getName()                                                                  | 91 |
| 9.6.3.2 learn()                                                                    | 91 |
| 9.6.3.3 operator=() [1/2]                                                          | 91 |
| 9.6.3.4 operator=() [2/2]                                                          | 92 |

|                                                                                                       |     |
|-------------------------------------------------------------------------------------------------------|-----|
| 9.6.3.5 predict()                                                                                     | 92  |
| 9.6.3.6 setName()                                                                                     | 92  |
| 9.7 LinkPred::Collector< Network > Class Template Reference                                           | 93  |
| 9.7.1 Detailed Description                                                                            | 93  |
| 9.7.2 Constructor & Destructor Documentation                                                          | 93  |
| 9.7.2.1 Collector() [1/3]                                                                             | 93  |
| 9.7.2.2 Collector() [2/3]                                                                             | 93  |
| 9.7.2.3 Collector() [3/3]                                                                             | 94  |
| 9.7.2.4 ~Collector()                                                                                  | 94  |
| 9.7.3 Member Function Documentation                                                                   | 94  |
| 9.7.3.1 getVisited()                                                                                  | 94  |
| 9.7.3.2 operator=() [1/2]                                                                             | 94  |
| 9.7.3.3 operator=() [2/2]                                                                             | 95  |
| 9.7.3.4 process()                                                                                     | 95  |
| 9.8 LinkPred::CosineSim Class Reference                                                               | 95  |
| 9.8.1 Detailed Description                                                                            | 96  |
| 9.8.2 Constructor & Destructor Documentation                                                          | 96  |
| 9.8.2.1 CosineSim() [1/3]                                                                             | 97  |
| 9.8.2.2 CosineSim() [2/3]                                                                             | 97  |
| 9.8.2.3 CosineSim() [3/3]                                                                             | 97  |
| 9.8.2.4 ~CosineSim()                                                                                  | 97  |
| 9.8.3 Member Function Documentation                                                                   | 97  |
| 9.8.3.1 operator=() [1/2]                                                                             | 97  |
| 9.8.3.2 operator=() [2/2]                                                                             | 98  |
| 9.8.3.3 sim()                                                                                         | 98  |
| 9.9 LinkPred::Counter< Network > Class Template Reference                                             | 98  |
| 9.9.1 Detailed Description                                                                            | 99  |
| 9.9.2 Constructor & Destructor Documentation                                                          | 99  |
| 9.9.2.1 Counter() [1/3]                                                                               | 99  |
| 9.9.2.2 Counter() [2/3]                                                                               | 99  |
| 9.9.2.3 Counter() [3/3]                                                                               | 100 |
| 9.9.2.4 ~Counter()                                                                                    | 100 |
| 9.9.3 Member Function Documentation                                                                   | 100 |
| 9.9.3.1 getCount()                                                                                    | 100 |
| 9.9.3.2 operator=() [1/2]                                                                             | 100 |
| 9.9.3.3 operator=() [2/2]                                                                             | 101 |
| 9.9.3.4 process()                                                                                     | 101 |
| 9.9.3.5 resetCount()                                                                                  | 101 |
| 9.10 LinkPred::DADAPredictor< Network, EdgeRndIt, ScoreRndIt, EdgeRndOutIt > Class Template Reference | 102 |
| 9.10.1 Detailed Description                                                                           | 103 |
| 9.10.2 Constructor & Destructor Documentation                                                         | 103 |



|                                                                                                       |     |
|-------------------------------------------------------------------------------------------------------|-----|
| 9.10.2.1 DADAPredictor() [1/3]                                                                        | 103 |
| 9.10.2.2 DADAPredictor() [2/3]                                                                        | 103 |
| 9.10.2.3 DADAPredictor() [3/3]                                                                        | 104 |
| 9.10.2.4 ~DADAPredictor()                                                                             | 104 |
| 9.10.3 Member Function Documentation                                                                  | 104 |
| 9.10.3.1 init()                                                                                       | 104 |
| 9.10.3.2 learn()                                                                                      | 105 |
| 9.10.3.3 operator=() [1/2]                                                                            | 105 |
| 9.10.3.4 operator=() [2/2]                                                                            | 105 |
| 9.10.3.5 predict()                                                                                    | 106 |
| 9.10.3.6 score()                                                                                      | 106 |
| 9.10.3.7 top()                                                                                        | 106 |
| 9.11 LinkPred::DCNEPredictor< Network, EdgeRndIt, ScoreRndIt, EdgeRndOutIt > Class Template Reference | 107 |
| 9.11.1 Detailed Description                                                                           | 108 |
| 9.11.2 Constructor & Destructor Documentation                                                         | 109 |
| 9.11.2.1 DCNEPredictor() [1/3]                                                                        | 109 |
| 9.11.2.2 DCNEPredictor() [2/3]                                                                        | 109 |
| 9.11.2.3 DCNEPredictor() [3/3]                                                                        | 109 |
| 9.11.2.4 ~DCNEPredictor()                                                                             | 110 |
| 9.11.3 Member Function Documentation                                                                  | 110 |
| 9.11.3.1 init()                                                                                       | 110 |
| 9.11.3.2 learn()                                                                                      | 110 |
| 9.11.3.3 operator=() [1/2]                                                                            | 110 |
| 9.11.3.4 operator=() [2/2]                                                                            | 111 |
| 9.11.3.5 predict()                                                                                    | 111 |
| 9.11.3.6 score()                                                                                      | 111 |
| 9.11.3.7 top()                                                                                        | 112 |
| 9.12 LinkPred::DeepWalk< Network > Class Template Reference                                           | 113 |
| 9.12.1 Detailed Description                                                                           | 114 |
| 9.12.2 Constructor & Destructor Documentation                                                         | 114 |
| 9.12.2.1 DeepWalk() [1/3]                                                                             | 114 |
| 9.12.2.2 DeepWalk() [2/3]                                                                             | 115 |
| 9.12.2.3 DeepWalk() [3/3]                                                                             | 115 |
| 9.12.2.4 ~DeepWalk()                                                                                  | 115 |
| 9.12.3 Member Function Documentation                                                                  | 115 |
| 9.12.3.1 encode()                                                                                     | 116 |
| 9.12.3.2 getAlpha()                                                                                   | 116 |
| 9.12.3.3 getDefaultDim()                                                                              | 116 |
| 9.12.3.4 getInitLR()                                                                                  | 116 |
| 9.12.3.5 getMaxCodeLength()                                                                           | 117 |
| 9.12.3.6 getNbNodeWalks()                                                                             | 117 |

|           |                                                                                                               |     |
|-----------|---------------------------------------------------------------------------------------------------------------|-----|
| 9.12.3.7  | <a href="#">getNbWalks()</a>                                                                                  | 117 |
| 9.12.3.8  | <a href="#">getStepInterval()</a>                                                                             | 117 |
| 9.12.3.9  | <a href="#">getTotalSteps()</a>                                                                               | 118 |
| 9.12.3.10 | <a href="#">getWalkLength()</a>                                                                               | 118 |
| 9.12.3.11 | <a href="#">getWindowSize()</a>                                                                               | 118 |
| 9.12.3.12 | <a href="#">init()</a>                                                                                        | 118 |
| 9.12.3.13 | <a href="#">operator=()</a> [1/2]                                                                             | 118 |
| 9.12.3.14 | <a href="#">operator=()</a> [2/2]                                                                             | 119 |
| 9.12.3.15 | <a href="#">setAlpha()</a>                                                                                    | 119 |
| 9.12.3.16 | <a href="#">setInitLR()</a>                                                                                   | 119 |
| 9.12.3.17 | <a href="#">setNbNodeWalks()</a>                                                                              | 120 |
| 9.12.3.18 | <a href="#">setNbWalks()</a>                                                                                  | 120 |
| 9.12.3.19 | <a href="#">setStepInterval()</a>                                                                             | 120 |
| 9.12.3.20 | <a href="#">setWalkLength()</a>                                                                               | 120 |
| 9.12.3.21 | <a href="#">setWeightMap()</a>                                                                                | 121 |
| 9.12.3.22 | <a href="#">setWindowSize()</a>                                                                               | 121 |
| 9.13      | <a href="#">LinkPred::DESPLDistCalculator&lt; Network, DistType, NbHopsType &gt; Class Template Reference</a> | 121 |
| 9.13.1    | <a href="#">Detailed Description</a>                                                                          | 123 |
| 9.13.2    | <a href="#">Member Typedef Documentation</a>                                                                  | 123 |
| 9.13.2.1  | <a href="#">Edge</a>                                                                                          | 123 |
| 9.13.2.2  | <a href="#">EdgeLengthMap</a>                                                                                 | 124 |
| 9.13.2.3  | <a href="#">EdgeLengthMapSP</a>                                                                               | 124 |
| 9.13.2.4  | <a href="#">Label</a>                                                                                         | 124 |
| 9.13.2.5  | <a href="#">LengthMapIdType</a>                                                                               | 124 |
| 9.13.2.6  | <a href="#">NetworkSP</a>                                                                                     | 124 |
| 9.13.2.7  | <a href="#">NodeDistMap</a>                                                                                   | 124 |
| 9.13.2.8  | <a href="#">NodeDistMapSP</a>                                                                                 | 125 |
| 9.13.2.9  | <a href="#">NodeID</a>                                                                                        | 125 |
| 9.13.2.10 | <a href="#">NodeSDistMap</a>                                                                                  | 125 |
| 9.13.2.11 | <a href="#">NodeSDistMapSP</a>                                                                                | 125 |
| 9.13.3    | <a href="#">Constructor &amp; Destructor Documentation</a>                                                    | 125 |
| 9.13.3.1  | <a href="#">DESPLDistCalculator()</a> [1/3]                                                                   | 125 |
| 9.13.3.2  | <a href="#">DESPLDistCalculator()</a> [2/3]                                                                   | 126 |
| 9.13.3.3  | <a href="#">DESPLDistCalculator()</a> [3/3]                                                                   | 126 |
| 9.13.3.4  | <a href="#">~ DESPLDistCalculator()</a>                                                                       | 126 |
| 9.13.4    | <a href="#">Member Function Documentation</a>                                                                 | 127 |
| 9.13.4.1  | <a href="#">getDist()</a> [1/3]                                                                               | 127 |
| 9.13.4.2  | <a href="#">getDist()</a> [2/3]                                                                               | 127 |
| 9.13.4.3  | <a href="#">getDist()</a> [3/3]                                                                               | 127 |
| 9.13.4.4  | <a href="#">getFinDistMapNoNeighb()</a>                                                                       | 128 |
| 9.13.4.5  | <a href="#">getIndDist()</a>                                                                                  | 128 |
| 9.13.4.6  | <a href="#">getLim()</a>                                                                                      | 129 |

|                                                                                                       |     |
|-------------------------------------------------------------------------------------------------------|-----|
| 9.13.4.7 getMaxNbNodesInCache()                                                                       | 129 |
| 9.13.4.8 getSDistMap()                                                                                | 129 |
| 9.13.4.9 operator=() [1/2]                                                                            | 129 |
| 9.13.4.10 operator=() [2/2]                                                                           | 130 |
| 9.13.4.11 setMaxNbNodesInCache()                                                                      | 130 |
| 9.14 LinkPred::DFS< Network, NodeProcessor > Class Template Reference                                 | 130 |
| 9.14.1 Detailed Description                                                                           | 131 |
| 9.14.2 Constructor & Destructor Documentation                                                         | 132 |
| 9.14.2.1 DFS() [1/3]                                                                                  | 132 |
| 9.14.2.2 DFS() [2/3]                                                                                  | 132 |
| 9.14.2.3 DFS() [3/3]                                                                                  | 132 |
| 9.14.2.4 ~DFS()                                                                                       | 133 |
| 9.14.3 Member Function Documentation                                                                  | 133 |
| 9.14.3.1 operator=() [1/2]                                                                            | 133 |
| 9.14.3.2 operator=() [2/2]                                                                            | 133 |
| 9.14.3.3 traverse()                                                                                   | 134 |
| 9.15 LinkPred::DHDIPredictor< Network, EdgeRndIt, ScoreRndIt, EdgeRndOutIt > Class Template Reference | 134 |
| 9.15.1 Detailed Description                                                                           | 135 |
| 9.15.2 Constructor & Destructor Documentation                                                         | 135 |
| 9.15.2.1 DHDIPredictor() [1/3]                                                                        | 135 |
| 9.15.2.2 DHDIPredictor() [2/3]                                                                        | 136 |
| 9.15.2.3 DHDIPredictor() [3/3]                                                                        | 136 |
| 9.15.2.4 ~DHDIPredictor()                                                                             | 136 |
| 9.15.3 Member Function Documentation                                                                  | 136 |
| 9.15.3.1 init()                                                                                       | 137 |
| 9.15.3.2 learn()                                                                                      | 137 |
| 9.15.3.3 operator=() [1/2]                                                                            | 137 |
| 9.15.3.4 operator=() [2/2]                                                                            | 137 |
| 9.15.3.5 predict()                                                                                    | 138 |
| 9.15.3.6 score()                                                                                      | 138 |
| 9.15.3.7 top()                                                                                        | 139 |
| 9.16 LinkPred::DHPIPredictor< Network, EdgeRndIt, ScoreRndIt, EdgeRndOutIt > Class Template Reference | 139 |
| 9.16.1 Detailed Description                                                                           | 140 |
| 9.16.2 Constructor & Destructor Documentation                                                         | 141 |
| 9.16.2.1 DHPIPredictor() [1/3]                                                                        | 141 |
| 9.16.2.2 DHPIPredictor() [2/3]                                                                        | 141 |
| 9.16.2.3 DHPIPredictor() [3/3]                                                                        | 141 |
| 9.16.2.4 ~DHPIPredictor()                                                                             | 142 |
| 9.16.3 Member Function Documentation                                                                  | 142 |
| 9.16.3.1 init()                                                                                       | 142 |
| 9.16.3.2 learn()                                                                                      | 142 |

|                                                                                   |     |
|-----------------------------------------------------------------------------------|-----|
| 9.16.3.3 operator=() [1/2]                                                        | 143 |
| 9.16.3.4 operator=() [2/2]                                                        | 143 |
| 9.16.3.5 predict()                                                                | 143 |
| 9.16.3.6 score()                                                                  | 144 |
| 9.16.3.7 top()                                                                    | 144 |
| 9.17 LinkPred::Dijkstra< Network, DistType, NbHopsType > Class Template Reference | 145 |
| 9.17.1 Detailed Description                                                       | 146 |
| 9.17.2 Member Typedef Documentation                                               | 146 |
| 9.17.2.1 Edge                                                                     | 146 |
| 9.17.2.2 EdgeLengthMap                                                            | 147 |
| 9.17.2.3 EdgeLengthMapSP                                                          | 147 |
| 9.17.2.4 Label                                                                    | 147 |
| 9.17.2.5 LengthMapIdType                                                          | 147 |
| 9.17.2.6 NetworkSP                                                                | 147 |
| 9.17.2.7 NodeDistMap                                                              | 147 |
| 9.17.2.8 NodeDistMapSP                                                            | 148 |
| 9.17.2.9 NodeID                                                                   | 148 |
| 9.17.2.10 NodeSDistMapSP                                                          | 148 |
| 9.17.2.11 PathType                                                                | 148 |
| 9.17.2.12 PathTypeSP                                                              | 148 |
| 9.17.3 Constructor & Destructor Documentation                                     | 148 |
| 9.17.3.1 Dijkstra() [1/4]                                                         | 149 |
| 9.17.3.2 Dijkstra() [2/4]                                                         | 149 |
| 9.17.3.3 Dijkstra() [3/4]                                                         | 149 |
| 9.17.3.4 Dijkstra() [4/4]                                                         | 149 |
| 9.17.3.5 ~Dijkstra()                                                              | 150 |
| 9.17.4 Member Function Documentation                                              | 150 |
| 9.17.4.1 getDist() [1/2]                                                          | 150 |
| 9.17.4.2 getDist() [2/2]                                                          | 150 |
| 9.17.4.3 getDistL()                                                               | 151 |
| 9.17.4.4 getDsim() [1/2]                                                          | 151 |
| 9.17.4.5 getDsim() [2/2]                                                          | 153 |
| 9.17.4.6 getIndDist()                                                             | 153 |
| 9.17.4.7 getIndDistToAll()                                                        | 154 |
| 9.17.4.8 getIndDsim()                                                             | 155 |
| 9.17.4.9 getNet()                                                                 | 155 |
| 9.17.4.10 getSDist()                                                              | 155 |
| 9.17.4.11 getShortestPath()                                                       | 156 |
| 9.17.4.12 operator=() [1/2]                                                       | 156 |
| 9.17.4.13 operator=() [2/2]                                                       | 157 |
| 9.17.4.14 registerLengthMap()                                                     | 157 |
| 9.17.4.15 setNet()                                                                | 157 |

|                                                                                                       |     |
|-------------------------------------------------------------------------------------------------------|-----|
| 9.17.4.16 unregisterLengthMap()                                                                       | 158 |
| 9.18 LinkPred::DJIDPredictor< Network, EdgeRndIt, ScoreRndIt, EdgeRndOutIt > Class Template Reference | 158 |
| 9.18.1 Detailed Description                                                                           | 159 |
| 9.18.2 Constructor & Destructor Documentation                                                         | 160 |
| 9.18.2.1 DJIDPredictor() [1/3]                                                                        | 160 |
| 9.18.2.2 DJIDPredictor() [2/3]                                                                        | 160 |
| 9.18.2.3 DJIDPredictor() [3/3]                                                                        | 160 |
| 9.18.2.4 ~DJIDPredictor()                                                                             | 161 |
| 9.18.3 Member Function Documentation                                                                  | 161 |
| 9.18.3.1 init()                                                                                       | 161 |
| 9.18.3.2 learn()                                                                                      | 161 |
| 9.18.3.3 operator=() [1/2]                                                                            | 161 |
| 9.18.3.4 operator=() [2/2]                                                                            | 162 |
| 9.18.3.5 predict()                                                                                    | 162 |
| 9.18.3.6 score()                                                                                      | 162 |
| 9.18.3.7 top()                                                                                        | 163 |
| 9.19 LinkPred::DLCPPredictor< Network, EdgeRndIt, ScoreRndIt, EdgeRndOutIt > Class Template Reference | 164 |
| 9.19.1 Detailed Description                                                                           | 165 |
| 9.19.2 Constructor & Destructor Documentation                                                         | 165 |
| 9.19.2.1 DLCPPredictor() [1/3]                                                                        | 165 |
| 9.19.2.2 DLCPPredictor() [2/3]                                                                        | 165 |
| 9.19.2.3 DLCPPredictor() [3/3]                                                                        | 166 |
| 9.19.2.4 ~DLCPPredictor()                                                                             | 166 |
| 9.19.3 Member Function Documentation                                                                  | 166 |
| 9.19.3.1 init()                                                                                       | 167 |
| 9.19.3.2 learn()                                                                                      | 167 |
| 9.19.3.3 operator=() [1/2]                                                                            | 167 |
| 9.19.3.4 operator=() [2/2]                                                                            | 167 |
| 9.19.3.5 predict()                                                                                    | 168 |
| 9.19.3.6 score()                                                                                      | 168 |
| 9.20 LinkPred::DLHNPredictor< Network, EdgeRndIt, ScoreRndIt, EdgeRndOutIt > Class Template Reference | 169 |
| 9.20.1 Detailed Description                                                                           | 170 |
| 9.20.2 Constructor & Destructor Documentation                                                         | 170 |
| 9.20.2.1 DLHNPredictor() [1/3]                                                                        | 170 |
| 9.20.2.2 DLHNPredictor() [2/3]                                                                        | 171 |
| 9.20.2.3 DLHNPredictor() [3/3]                                                                        | 171 |
| 9.20.2.4 ~DLHNPredictor()                                                                             | 171 |
| 9.20.3 Member Function Documentation                                                                  | 171 |
| 9.20.3.1 init()                                                                                       | 172 |
| 9.20.3.2 learn()                                                                                      | 172 |

|                                                                                                         |     |
|---------------------------------------------------------------------------------------------------------|-----|
| 9.20.3.3 operator=() [1/2]                                                                              | 172 |
| 9.20.3.4 operator=() [2/2]                                                                              | 172 |
| 9.20.3.5 predict()                                                                                      | 173 |
| 9.20.3.6 score()                                                                                        | 173 |
| 9.20.3.7 top()                                                                                          | 174 |
| 9.21 LinkPred::DLPredictor< NetworkT, EdgeRndItT, ScoreRndItT, EdgeRndOutItT > Class Template Reference | 174 |
| 9.21.1 Detailed Description                                                                             | 175 |
| 9.21.2 Member Typedef Documentation                                                                     | 175 |
| 9.21.2.1 Edge                                                                                           | 175 |
| 9.21.2.2 EdgeRndIt                                                                                      | 176 |
| 9.21.2.3 EdgeRndOutIt                                                                                   | 176 |
| 9.21.2.4 Network                                                                                        | 176 |
| 9.21.2.5 NodeID                                                                                         | 176 |
| 9.21.2.6 ScoreRndIt                                                                                     | 176 |
| 9.21.3 Constructor & Destructor Documentation                                                           | 177 |
| 9.21.3.1 DLPredictor() [1/3]                                                                            | 177 |
| 9.21.3.2 DLPredictor() [2/3]                                                                            | 177 |
| 9.21.3.3 DLPredictor() [3/3]                                                                            | 177 |
| 9.21.3.4 ~DLPredictor()                                                                                 | 178 |
| 9.21.4 Member Function Documentation                                                                    | 178 |
| 9.21.4.1 getName()                                                                                      | 178 |
| 9.21.4.2 getNet()                                                                                       | 178 |
| 9.21.4.3 init()                                                                                         | 179 |
| 9.21.4.4 learn()                                                                                        | 179 |
| 9.21.4.5 operator=() [1/2]                                                                              | 179 |
| 9.21.4.6 operator=() [2/2]                                                                              | 180 |
| 9.21.4.7 predict()                                                                                      | 180 |
| 9.21.4.8 predictNeg()                                                                                   | 180 |
| 9.21.4.9 score()                                                                                        | 181 |
| 9.21.4.10 setName()                                                                                     | 181 |
| 9.21.4.11 top()                                                                                         | 182 |
| 9.22 LinkPred::DNetwork< LabelT, NodeIDT, EdgeT > Class Template Reference                              | 182 |
| 9.22.1 Detailed Description                                                                             | 185 |
| 9.22.2 Member Typedef Documentation                                                                     | 185 |
| 9.22.2.1 Edge                                                                                           | 185 |
| 9.22.2.2 EdgIt                                                                                          | 186 |
| 9.22.2.3 EdgeMapSP                                                                                      | 186 |
| 9.22.2.4 Label                                                                                          | 186 |
| 9.22.2.5 LabelIt                                                                                        | 186 |
| 9.22.2.6 NodeID                                                                                         | 186 |
| 9.22.2.7 NodeIt                                                                                         | 186 |

|                                                         |     |
|---------------------------------------------------------|-----|
| 9.22.2.8 NodeMapSP . . . . .                            | 187 |
| 9.22.2.9 NodeSMapSP . . . . .                           | 187 |
| 9.22.3 Constructor & Destructor Documentation . . . . . | 187 |
| 9.22.3.1 DNetwork() [1/4] . . . . .                     | 187 |
| 9.22.3.2 DNetwork() [2/4] . . . . .                     | 187 |
| 9.22.3.3 DNetwork() [3/4] . . . . .                     | 188 |
| 9.22.3.4 DNetwork() [4/4] . . . . .                     | 188 |
| 9.22.3.5 ~DNetwork() . . . . .                          | 188 |
| 9.22.4 Member Function Documentation . . . . .          | 188 |
| 9.22.4.1 addEdge() . . . . .                            | 188 |
| 9.22.4.2 addNode() . . . . .                            | 189 |
| 9.22.4.3 assemble() . . . . .                           | 189 |
| 9.22.4.4 compareEdgeEnd() . . . . .                     | 189 |
| 9.22.4.5 coupleAtOrd() . . . . .                        | 190 |
| 9.22.4.6 coupleOrd() . . . . .                          | 190 |
| 9.22.4.7 createEdgeMap() . . . . .                      | 190 |
| 9.22.4.8 createEdgeMapSP() . . . . .                    | 191 |
| 9.22.4.9 createNodeMap() . . . . .                      | 191 |
| 9.22.4.10 createNodeMapSP() . . . . .                   | 191 |
| 9.22.4.11 createNodeSMap() . . . . .                    | 192 |
| 9.22.4.12 createNodeSMapSP() . . . . .                  | 192 |
| 9.22.4.13 edgesBegin() . . . . .                        | 193 |
| 9.22.4.14 edgesEnd() . . . . .                          | 193 |
| 9.22.4.15 end() . . . . .                               | 193 |
| 9.22.4.16 findLabel() . . . . .                         | 193 |
| 9.22.4.17 findNode() . . . . .                          | 194 |
| 9.22.4.18 getAvgDeg() . . . . .                         | 194 |
| 9.22.4.19 getAvgInDeg() . . . . .                       | 194 |
| 9.22.4.20 getAvgOutDeg() . . . . .                      | 195 |
| 9.22.4.21 getDeg() . . . . .                            | 195 |
| 9.22.4.22 getDegStat() . . . . .                        | 195 |
| 9.22.4.23 getID() . . . . .                             | 196 |
| 9.22.4.24 getInDeg() . . . . .                          | 196 |
| 9.22.4.25 getInDegStat() . . . . .                      | 196 |
| 9.22.4.26 getInOutDeg() . . . . .                       | 197 |
| 9.22.4.27 getLabel() . . . . .                          | 197 |
| 9.22.4.28 getMaxDeg() . . . . .                         | 197 |
| 9.22.4.29 getMaxInDeg() . . . . .                       | 198 |
| 9.22.4.30 getMaxOutDeg() . . . . .                      | 198 |
| 9.22.4.31 getMinDeg() . . . . .                         | 198 |
| 9.22.4.32 getMinInDeg() . . . . .                       | 198 |
| 9.22.4.33 getMinOutDeg() . . . . .                      | 199 |

|           |                     |     |
|-----------|---------------------|-----|
| 9.22.4.34 | getNbCouples()      | 199 |
| 9.22.4.35 | getNbEdges()        | 199 |
| 9.22.4.36 | getNbNodes()        | 199 |
| 9.22.4.37 | getNbNonEdges()     | 200 |
| 9.22.4.38 | getNbPaths()        | 200 |
| 9.22.4.39 | getOutDeg()         | 200 |
| 9.22.4.40 | getOutDegStat()     | 201 |
| 9.22.4.41 | inEdgesBegin()      | 201 |
| 9.22.4.42 | inEdgesEnd()        | 201 |
| 9.22.4.43 | inNeighborsBegin()  | 201 |
| 9.22.4.44 | inNeighborsEnd()    | 202 |
| 9.22.4.45 | isEdge() [1/2]      | 202 |
| 9.22.4.46 | isEdge() [2/2]      | 203 |
| 9.22.4.47 | labelsBegin()       | 203 |
| 9.22.4.48 | labelsEnd()         | 203 |
| 9.22.4.49 | makeEdge()          | 203 |
| 9.22.4.50 | neighbBegin()       | 204 |
| 9.22.4.51 | neighbEnd()         | 204 |
| 9.22.4.52 | nodesBegin()        | 204 |
| 9.22.4.53 | nodesDegBegin()     | 205 |
| 9.22.4.54 | nodesDegEnd()       | 205 |
| 9.22.4.55 | nodesEnd()          | 205 |
| 9.22.4.56 | nonEdgesBegin()     | 205 |
| 9.22.4.57 | nonEdgesEnd()       | 206 |
| 9.22.4.58 | operator=() [1/2]   | 206 |
| 9.22.4.59 | operator=() [2/2]   | 206 |
| 9.22.4.60 | outEdgesBegin()     | 206 |
| 9.22.4.61 | outEdgesEnd()       | 207 |
| 9.22.4.62 | outNeighborsBegin() | 207 |
| 9.22.4.63 | outNeighborsEnd()   | 207 |
| 9.22.4.64 | print()             | 208 |
| 9.22.4.65 | printEdges()        | 208 |
| 9.22.4.66 | read()              | 208 |
| 9.22.4.67 | readEdges()         | 209 |
| 9.22.4.68 | reverseEdge()       | 209 |
| 9.22.4.69 | rndEdgesBegin()     | 209 |
| 9.22.4.70 | rndEdgesEnd()       | 210 |
| 9.22.4.71 | rndNodesBegin()     | 210 |
| 9.22.4.72 | rndNodesEnd()       | 210 |
| 9.22.4.73 | rndNonEdgesBegin()  | 211 |
| 9.22.4.74 | rndNonEdgesEnd()    | 211 |
| 9.22.4.75 | shuffle()           | 211 |



|                                                                                                       |     |
|-------------------------------------------------------------------------------------------------------|-----|
| 9.22.4.76 start()                                                                                     | 212 |
| 9.22.4.77 write()                                                                                     | 212 |
| 9.23 LinkPred::DotProd Class Reference                                                                | 212 |
| 9.23.1 Detailed Description                                                                           | 213 |
| 9.23.2 Constructor & Destructor Documentation                                                         | 213 |
| 9.23.2.1 DotProd() [1/3]                                                                              | 214 |
| 9.23.2.2 DotProd() [2/3]                                                                              | 214 |
| 9.23.2.3 DotProd() [3/3]                                                                              | 214 |
| 9.23.2.4 ~DotProd()                                                                                   | 214 |
| 9.23.3 Member Function Documentation                                                                  | 214 |
| 9.23.3.1 operator=() [1/2]                                                                            | 214 |
| 9.23.3.2 operator=() [2/2]                                                                            | 215 |
| 9.23.3.3 sim()                                                                                        | 215 |
| 9.24 LinkPred::DPATPredictor< Network, EdgeRndIt, ScoreRndIt, EdgeRndOutIt > Class Template Reference | 215 |
| 9.24.1 Detailed Description                                                                           | 216 |
| 9.24.2 Constructor & Destructor Documentation                                                         | 217 |
| 9.24.2.1 DPATPredictor() [1/3]                                                                        | 217 |
| 9.24.2.2 DPATPredictor() [2/3]                                                                        | 217 |
| 9.24.2.3 DPATPredictor() [3/3]                                                                        | 217 |
| 9.24.2.4 ~DPATPredictor()                                                                             | 218 |
| 9.24.3 Member Function Documentation                                                                  | 218 |
| 9.24.3.1 init()                                                                                       | 218 |
| 9.24.3.2 learn()                                                                                      | 219 |
| 9.24.3.3 operator=() [1/2]                                                                            | 219 |
| 9.24.3.4 operator=() [2/2]                                                                            | 219 |
| 9.24.3.5 predict()                                                                                    | 220 |
| 9.24.3.6 score()                                                                                      | 220 |
| 9.25 LinkPred::DPSTPredictor< Network, EdgeRndIt, ScoreRndIt, EdgeRndOutIt > Class Template Reference | 220 |
| 9.25.1 Detailed Description                                                                           | 222 |
| 9.25.2 Constructor & Destructor Documentation                                                         | 222 |
| 9.25.2.1 DPSTPredictor() [1/3]                                                                        | 222 |
| 9.25.2.2 DPSTPredictor() [2/3]                                                                        | 222 |
| 9.25.2.3 DPSTPredictor() [3/3]                                                                        | 223 |
| 9.25.2.4 ~DPSTPredictor()                                                                             | 223 |
| 9.25.3 Member Function Documentation                                                                  | 223 |
| 9.25.3.1 init()                                                                                       | 223 |
| 9.25.3.2 learn()                                                                                      | 224 |
| 9.25.3.3 loadEdgeScores()                                                                             | 224 |
| 9.25.3.4 operator=() [1/2]                                                                            | 224 |
| 9.25.3.5 operator=() [2/2]                                                                            | 225 |
| 9.25.3.6 score()                                                                                      | 225 |

|                                                                                                       |     |
|-------------------------------------------------------------------------------------------------------|-----|
| 9.25.3.7 setEdgeScores()                                                                              | 225 |
| 9.26 LinkPred::DSAPredictor< Network, EdgeRndIt, ScoreRndIt, EdgeRndOutIt > Class Template Reference  | 226 |
| 9.26.1 Detailed Description                                                                           | 227 |
| 9.26.2 Constructor & Destructor Documentation                                                         | 227 |
| 9.26.2.1 DSAPredictor() [1/3]                                                                         | 227 |
| 9.26.2.2 DSAPredictor() [2/3]                                                                         | 228 |
| 9.26.2.3 DSAPredictor() [3/3]                                                                         | 228 |
| 9.26.2.4 ~DSAPredictor()                                                                              | 228 |
| 9.26.3 Member Function Documentation                                                                  | 228 |
| 9.26.3.1 init()                                                                                       | 229 |
| 9.26.3.2 learn()                                                                                      | 229 |
| 9.26.3.3 operator=() [1/2]                                                                            | 229 |
| 9.26.3.4 operator=() [2/2]                                                                            | 229 |
| 9.26.3.5 predict()                                                                                    | 230 |
| 9.26.3.6 score()                                                                                      | 230 |
| 9.26.3.7 top()                                                                                        | 231 |
| 9.27 LinkPred::DSOIPredictor< Network, EdgeRndIt, ScoreRndIt, EdgeRndOutIt > Class Template Reference | 231 |
| 9.27.1 Detailed Description                                                                           | 232 |
| 9.27.2 Constructor & Destructor Documentation                                                         | 233 |
| 9.27.2.1 DSOIPredictor() [1/3]                                                                        | 233 |
| 9.27.2.2 DSOIPredictor() [2/3]                                                                        | 233 |
| 9.27.2.3 DSOIPredictor() [3/3]                                                                        | 233 |
| 9.27.2.4 ~DSOIPredictor()                                                                             | 234 |
| 9.27.3 Member Function Documentation                                                                  | 234 |
| 9.27.3.1 init()                                                                                       | 234 |
| 9.27.3.2 learn()                                                                                      | 234 |
| 9.27.3.3 operator=() [1/2]                                                                            | 235 |
| 9.27.3.4 operator=() [2/2]                                                                            | 235 |
| 9.27.3.5 predict()                                                                                    | 235 |
| 9.27.3.6 score()                                                                                      | 236 |
| 9.27.3.7 top()                                                                                        | 236 |
| 9.28 LinkPred::Simp::Evaluator::Factory::ECLParams Struct Reference                                   | 237 |
| 9.28.1 Detailed Description                                                                           | 237 |
| 9.28.2 Member Data Documentation                                                                      | 237 |
| 9.28.2.1 classifierName                                                                               | 237 |
| 9.28.2.2 dim                                                                                          | 237 |
| 9.28.2.3 encoderName                                                                                  | 237 |
| 9.28.2.4 negRatio                                                                                     | 238 |
| 9.28.2.5 posRatio                                                                                     | 238 |
| 9.28.2.6 seed                                                                                         | 238 |
| 9.29 LinkPred::UNetwork< LabelT, NodeIDT, EdgeT >::EdgeMap< ValueType > Class Template Reference      | 238 |

|                                                                                                  |     |
|--------------------------------------------------------------------------------------------------|-----|
| 9.29.1 Detailed Description                                                                      | 239 |
| 9.29.2 Member Typedef Documentation                                                              | 239 |
| 9.29.2.1 EdgeMapConstIt                                                                          | 239 |
| 9.29.2.2 EdgeMapIt                                                                               | 239 |
| 9.29.3 Constructor & Destructor Documentation                                                    | 239 |
| 9.29.3.1 EdgeMap() [1/2]                                                                         | 240 |
| 9.29.3.2 EdgeMap() [2/2]                                                                         | 240 |
| 9.29.3.3 ~EdgeMap()                                                                              | 240 |
| 9.29.4 Member Function Documentation                                                             | 240 |
| 9.29.4.1 at()                                                                                    | 240 |
| 9.29.4.2 begin()                                                                                 | 241 |
| 9.29.4.3 cbegin()                                                                                | 241 |
| 9.29.4.4 cend()                                                                                  | 241 |
| 9.29.4.5 end()                                                                                   | 242 |
| 9.29.4.6 find() [1/2]                                                                            | 242 |
| 9.29.4.7 find() [2/2]                                                                            | 242 |
| 9.29.4.8 operator=() [1/2]                                                                       | 243 |
| 9.29.4.9 operator=() [2/2]                                                                       | 243 |
| 9.29.4.10 operator[]() [1/2]                                                                     | 243 |
| 9.29.4.11 operator[]() [2/2]                                                                     | 244 |
| 9.29.4.12 size()                                                                                 | 244 |
| 9.30 LinkPred::DNetwork< LabelT, NodeIDT, EdgeT >::EdgeMap< ValueType > Class Template Reference | 244 |
| 9.30.1 Detailed Description                                                                      | 245 |
| 9.30.2 Member Typedef Documentation                                                              | 245 |
| 9.30.2.1 EdgeMapConstIt                                                                          | 245 |
| 9.30.2.2 EdgeMapIt                                                                               | 246 |
| 9.30.3 Constructor & Destructor Documentation                                                    | 246 |
| 9.30.3.1 EdgeMap() [1/2]                                                                         | 246 |
| 9.30.3.2 EdgeMap() [2/2]                                                                         | 246 |
| 9.30.3.3 ~EdgeMap()                                                                              | 246 |
| 9.30.4 Member Function Documentation                                                             | 247 |
| 9.30.4.1 at()                                                                                    | 247 |
| 9.30.4.2 begin()                                                                                 | 247 |
| 9.30.4.3 cbegin()                                                                                | 247 |
| 9.30.4.4 cend()                                                                                  | 248 |
| 9.30.4.5 end()                                                                                   | 248 |
| 9.30.4.6 find() [1/2]                                                                            | 248 |
| 9.30.4.7 find() [2/2]                                                                            | 248 |
| 9.30.4.8 operator=() [1/2]                                                                       | 249 |
| 9.30.4.9 operator=() [2/2]                                                                       | 249 |
| 9.30.4.10 operator[]() [1/2]                                                                     | 249 |
| 9.30.4.11 operator[]() [2/2]                                                                     | 250 |

|                                                                    |     |
|--------------------------------------------------------------------|-----|
| 9.30.4.12 size()                                                   | 250 |
| 9.31 LinkPred::Utils::EdgeScore< Label > Struct Template Reference | 251 |
| 9.31.1 Detailed Description                                        | 251 |
| 9.31.2 Member Data Documentation                                   | 251 |
| 9.31.2.1 i                                                         | 251 |
| 9.31.2.2 j                                                         | 251 |
| 9.31.2.3 score                                                     | 252 |
| 9.32 LinkPred::Simp::EdgeScore Struct Reference                    | 252 |
| 9.32.1 Detailed Description                                        | 252 |
| 9.32.2 Member Data Documentation                                   | 252 |
| 9.32.2.1 i                                                         | 252 |
| 9.32.2.2 j                                                         | 252 |
| 9.32.2.3 score                                                     | 253 |
| 9.33 LinkPred::Simp::EdgeScoreByID Struct Reference                | 253 |
| 9.33.1 Detailed Description                                        | 253 |
| 9.33.2 Member Data Documentation                                   | 253 |
| 9.33.2.1 i                                                         | 253 |
| 9.33.2.2 j                                                         | 253 |
| 9.33.2.3 score                                                     | 254 |
| 9.34 LinkPred::Encoder< Network > Class Template Reference         | 254 |
| 9.34.1 Detailed Description                                        | 254 |
| 9.34.2 Member Typedef Documentation                                | 255 |
| 9.34.2.1 CodeMap                                                   | 255 |
| 9.34.2.2 CodeMapSP                                                 | 255 |
| 9.34.2.3 Edge                                                      | 255 |
| 9.34.2.4 NodeID                                                    | 255 |
| 9.34.2.5 WeightMap                                                 | 255 |
| 9.34.2.6 WeightMapSP                                               | 256 |
| 9.34.3 Constructor & Destructor Documentation                      | 256 |
| 9.34.3.1 Encoder() [1/3]                                           | 256 |
| 9.34.3.2 Encoder() [2/3]                                           | 256 |
| 9.34.3.3 Encoder() [3/3]                                           | 256 |
| 9.34.3.4 ~Encoder()                                                | 257 |
| 9.34.4 Member Function Documentation                               | 257 |
| 9.34.4.1 encode()                                                  | 257 |
| 9.34.4.2 getDim()                                                  | 257 |
| 9.34.4.3 getEdgeCode() [1/2]                                       | 257 |
| 9.34.4.4 getEdgeCode() [2/2]                                       | 258 |
| 9.34.4.5 getEdgeCodeDim()                                          | 258 |
| 9.34.4.6 getName()                                                 | 258 |
| 9.34.4.7 getNodeCode()                                             | 259 |
| 9.34.4.8 getNodeCodeMap()                                          | 259 |

|           |                                                                                                             |     |
|-----------|-------------------------------------------------------------------------------------------------------------|-----|
| 9.34.4.9  | <a href="#">getWeightMap()</a>                                                                              | 259 |
| 9.34.4.10 | <a href="#">init()</a>                                                                                      | 259 |
| 9.34.4.11 | <a href="#">operator=()</a> [1/2]                                                                           | 259 |
| 9.34.4.12 | <a href="#">operator=()</a> [2/2]                                                                           | 260 |
| 9.34.4.13 | <a href="#">setDim()</a>                                                                                    | 260 |
| 9.34.4.14 | <a href="#">setName()</a>                                                                                   | 260 |
| 9.34.4.15 | <a href="#">setWeightMap()</a>                                                                              | 261 |
| 9.35      | <a href="#">LinkPred::Simp::Evaluator::Factory::ESMPParams Struct Reference</a>                             | 261 |
| 9.35.1    | <a href="#">Detailed Description</a>                                                                        | 261 |
| 9.35.2    | <a href="#">Member Data Documentation</a>                                                                   | 261 |
| 9.35.2.1  | <a href="#">dim</a>                                                                                         | 261 |
| 9.35.2.2  | <a href="#">encoderName</a>                                                                                 | 262 |
| 9.35.2.3  | <a href="#">seed</a>                                                                                        | 262 |
| 9.35.2.4  | <a href="#">simMeasureName</a>                                                                              | 262 |
| 9.36      | <a href="#">LinkPred::ESPDistCalculator&lt; Network, DistType, NbHopsType &gt; Class Template Reference</a> | 262 |
| 9.36.1    | <a href="#">Detailed Description</a>                                                                        | 263 |
| 9.36.2    | <a href="#">Member Typedef Documentation</a>                                                                | 264 |
| 9.36.2.1  | <a href="#">Edge</a>                                                                                        | 264 |
| 9.36.2.2  | <a href="#">EdgeLengthMap</a>                                                                               | 264 |
| 9.36.2.3  | <a href="#">EdgeLengthMapSP</a>                                                                             | 264 |
| 9.36.2.4  | <a href="#">Label</a>                                                                                       | 264 |
| 9.36.2.5  | <a href="#">LengthMapIdType</a>                                                                             | 265 |
| 9.36.2.6  | <a href="#">NetworkSP</a>                                                                                   | 265 |
| 9.36.2.7  | <a href="#">NodeDistMap</a>                                                                                 | 265 |
| 9.36.2.8  | <a href="#">NodeDistMapSP</a>                                                                               | 265 |
| 9.36.2.9  | <a href="#">NodeId</a>                                                                                      | 265 |
| 9.36.3    | <a href="#">Constructor &amp; Destructor Documentation</a>                                                  | 265 |
| 9.36.3.1  | <a href="#">ESPDistCalculator()</a> [1/3]                                                                   | 266 |
| 9.36.3.2  | <a href="#">ESPDistCalculator()</a> [2/3]                                                                   | 267 |
| 9.36.3.3  | <a href="#">ESPDistCalculator()</a> [3/3]                                                                   | 267 |
| 9.36.3.4  | <a href="#">~ESPDistCalculator()</a>                                                                        | 267 |
| 9.36.4    | <a href="#">Member Function Documentation</a>                                                               | 268 |
| 9.36.4.1  | <a href="#">getCacheHits()</a>                                                                              | 268 |
| 9.36.4.2  | <a href="#">getCacheMiss()</a>                                                                              | 268 |
| 9.36.4.3  | <a href="#">getDist()</a> [1/2]                                                                             | 268 |
| 9.36.4.4  | <a href="#">getDist()</a> [2/2]                                                                             | 269 |
| 9.36.4.5  | <a href="#">getIndDist()</a>                                                                                | 269 |
| 9.36.4.6  | <a href="#">operator=()</a> [1/2]                                                                           | 269 |
| 9.36.4.7  | <a href="#">operator=()</a> [2/2]                                                                           | 270 |
| 9.37      | <a href="#">LinkPred::ESPDsimCalculator&lt; Network, DsimType, NbHopsType &gt; Class Template Reference</a> | 270 |
| 9.37.1    | <a href="#">Detailed Description</a>                                                                        | 271 |
| 9.37.2    | <a href="#">Member Typedef Documentation</a>                                                                | 272 |

|                                                                                               |     |
|-----------------------------------------------------------------------------------------------|-----|
| 9.37.2.1 Edge                                                                                 | 272 |
| 9.37.2.2 EdgeLengthMap                                                                        | 272 |
| 9.37.2.3 EdgeLengthMapSP                                                                      | 272 |
| 9.37.2.4 Label                                                                                | 272 |
| 9.37.2.5 LengthMapIdType                                                                      | 273 |
| 9.37.2.6 NetworkSP                                                                            | 273 |
| 9.37.2.7 NodeDsimMap                                                                          | 273 |
| 9.37.2.8 NodeDsimMapSP                                                                        | 273 |
| 9.37.2.9 NodeID                                                                               | 273 |
| 9.37.3 Constructor & Destructor Documentation                                                 | 273 |
| 9.37.3.1 ESPDsimCalculator() [1/3]                                                            | 274 |
| 9.37.3.2 ESPDsimCalculator() [2/3]                                                            | 275 |
| 9.37.3.3 ESPDsimCalculator() [3/3]                                                            | 275 |
| 9.37.3.4 ~ESPDsimCalculator()                                                                 | 275 |
| 9.37.4 Member Function Documentation                                                          | 276 |
| 9.37.4.1 getDist() [1/2]                                                                      | 276 |
| 9.37.4.2 getDist() [2/2]                                                                      | 276 |
| 9.37.4.3 getIndDist()                                                                         | 276 |
| 9.37.4.4 operator=() [1/2]                                                                    | 277 |
| 9.37.4.5 operator=() [2/2]                                                                    | 277 |
| 9.38 LinkPred::ESPIndSimIcalculator< Network, DistType, NbHopsType > Class Template Reference | 277 |
| 9.38.1 Detailed Description                                                                   | 279 |
| 9.38.2 Member Typedef Documentation                                                           | 279 |
| 9.38.2.1 Edge                                                                                 | 279 |
| 9.38.2.2 EdgeLengthMap                                                                        | 279 |
| 9.38.2.3 EdgeLengthMapSP                                                                      | 280 |
| 9.38.2.4 Label                                                                                | 280 |
| 9.38.2.5 LengthMapIdType                                                                      | 280 |
| 9.38.2.6 NetworkSP                                                                            | 280 |
| 9.38.2.7 NodeDistMap                                                                          | 280 |
| 9.38.2.8 NodeDistMapSP                                                                        | 280 |
| 9.38.2.9 NodeID                                                                               | 281 |
| 9.38.3 Constructor & Destructor Documentation                                                 | 281 |
| 9.38.3.1 ESPIndSimIcalculator() [1/3]                                                         | 281 |
| 9.38.3.2 ESPIndSimIcalculator() [2/3]                                                         | 281 |
| 9.38.3.3 ESPIndSimIcalculator() [3/3]                                                         | 281 |
| 9.38.3.4 ~ESPIndSimIcalculator()                                                              | 282 |
| 9.38.4 Member Function Documentation                                                          | 282 |
| 9.38.4.1 getDirIndSimI()                                                                      | 282 |
| 9.38.4.2 getIndSimI()                                                                         | 282 |
| 9.38.4.3 operator=() [1/2]                                                                    | 283 |
| 9.38.4.4 operator=() [2/2]                                                                    | 283 |

|                                                                                                   |     |
|---------------------------------------------------------------------------------------------------|-----|
| 9.39 LinkPred::ESPLDistCalculator< Network, DistType, NbHopsType > Class Template Reference . . . | 284 |
| 9.39.1 Detailed Description . . . . .                                                             | 285 |
| 9.39.2 Member Typedef Documentation . . . . .                                                     | 285 |
| 9.39.2.1 Edge . . . . .                                                                           | 286 |
| 9.39.2.2 EdgeLengthMap . . . . .                                                                  | 286 |
| 9.39.2.3 EdgeLengthMapSP . . . . .                                                                | 286 |
| 9.39.2.4 Label . . . . .                                                                          | 286 |
| 9.39.2.5 LengthMapIdType . . . . .                                                                | 286 |
| 9.39.2.6 NetworkSP . . . . .                                                                      | 286 |
| 9.39.2.7 NodeDistMap . . . . .                                                                    | 287 |
| 9.39.2.8 NodeDistMapSP . . . . .                                                                  | 287 |
| 9.39.2.9 NodeID . . . . .                                                                         | 287 |
| 9.39.2.10 NodeSDistMap . . . . .                                                                  | 287 |
| 9.39.2.11 NodeSDistMapSP . . . . .                                                                | 287 |
| 9.39.3 Constructor & Destructor Documentation . . . . .                                           | 287 |
| 9.39.3.1 ESPLDistCalculator() [1/3] . . . . .                                                     | 288 |
| 9.39.3.2 ESPLDistCalculator() [2/3] . . . . .                                                     | 288 |
| 9.39.3.3 ESPLDistCalculator() [3/3] . . . . .                                                     | 288 |
| 9.39.3.4 ~ ESPLDistCalculator() . . . . .                                                         | 289 |
| 9.39.4 Member Function Documentation . . . . .                                                    | 289 |
| 9.39.4.1 getDist() [1/3] . . . . .                                                                | 289 |
| 9.39.4.2 getDist() [2/3] . . . . .                                                                | 289 |
| 9.39.4.3 getDist() [3/3] . . . . .                                                                | 290 |
| 9.39.4.4 getFinDistMapNoNeighb() . . . . .                                                        | 290 |
| 9.39.4.5 getIndDist() . . . . .                                                                   | 290 |
| 9.39.4.6 getLim() . . . . .                                                                       | 291 |
| 9.39.4.7 getMaxNbNodesInCache() . . . . .                                                         | 291 |
| 9.39.4.8 getSDistMap() . . . . .                                                                  | 291 |
| 9.39.4.9 operator=() [1/2] . . . . .                                                              | 292 |
| 9.39.4.10 operator=() [2/2] . . . . .                                                             | 292 |
| 9.39.4.11 setMaxNbNodesInCache() . . . . .                                                        | 292 |
| 9.40 LinkPred::ESPLSimlCalculator< Network, DistType, NbHopsType > Class Template Reference . . . | 293 |
| 9.40.1 Detailed Description . . . . .                                                             | 294 |
| 9.40.2 Member Typedef Documentation . . . . .                                                     | 295 |
| 9.40.2.1 Edge . . . . .                                                                           | 295 |
| 9.40.2.2 EdgeLengthMap . . . . .                                                                  | 295 |
| 9.40.2.3 EdgeLengthMapSP . . . . .                                                                | 295 |
| 9.40.2.4 Label . . . . .                                                                          | 295 |
| 9.40.2.5 LengthMapIdType . . . . .                                                                | 295 |
| 9.40.2.6 NetworkSP . . . . .                                                                      | 296 |
| 9.40.2.7 NodeID . . . . .                                                                         | 296 |
| 9.40.2.8 NodeSDistMap . . . . .                                                                   | 296 |

|                                                                                            |     |
|--------------------------------------------------------------------------------------------|-----|
| 9.40.2.9 NodeSDistMapSP                                                                    | 296 |
| 9.40.3 Constructor & Destructor Documentation                                              | 296 |
| 9.40.3.1 ESPLSimlCalculator() [1/3]                                                        | 296 |
| 9.40.3.2 ESPLSimlCalculator() [2/3]                                                        | 297 |
| 9.40.3.3 ESPLSimlCalculator() [3/3]                                                        | 297 |
| 9.40.3.4 ~ ESPLSimlCalculator()                                                            | 297 |
| 9.40.4 Member Function Documentation                                                       | 298 |
| 9.40.4.1 getDirSiml() [1/2]                                                                | 298 |
| 9.40.4.2 getDirSiml() [2/2]                                                                | 298 |
| 9.40.4.3 getLim()                                                                          | 298 |
| 9.40.4.4 getMaxNbNodesInCache()                                                            | 299 |
| 9.40.4.5 getNnzSimlMap()                                                                   | 299 |
| 9.40.4.6 getNnzSimlMapNoNeighb()                                                           | 299 |
| 9.40.4.7 getSiml() [1/2]                                                                   | 300 |
| 9.40.4.8 getSiml() [2/2]                                                                   | 300 |
| 9.40.4.9 isUseHops()                                                                       | 300 |
| 9.40.4.10 operator=() [1/2]                                                                | 301 |
| 9.40.4.11 operator=() [2/2]                                                                | 301 |
| 9.40.4.12 setMaxNbNodesInCache()                                                           | 301 |
| 9.40.4.13 setUseHops()                                                                     | 302 |
| 9.41 LinkPred::ESPSimlCalculator< Network, DistType, NbHopsType > Class Template Reference | 302 |
| 9.41.1 Detailed Description                                                                | 304 |
| 9.41.2 Member Typedef Documentation                                                        | 304 |
| 9.41.2.1 Edge                                                                              | 304 |
| 9.41.2.2 EdgeLengthMap                                                                     | 304 |
| 9.41.2.3 EdgeLengthMapSP                                                                   | 304 |
| 9.41.2.4 Label                                                                             | 305 |
| 9.41.2.5 LengthMapIdType                                                                   | 305 |
| 9.41.2.6 NetworkSP                                                                         | 305 |
| 9.41.2.7 NodeDistMap                                                                       | 305 |
| 9.41.2.8 NodeDistMapSP                                                                     | 305 |
| 9.41.2.9 NodeID                                                                            | 305 |
| 9.41.3 Constructor & Destructor Documentation                                              | 306 |
| 9.41.3.1 ESPSimlCalculator() [1/3]                                                         | 306 |
| 9.41.3.2 ESPSimlCalculator() [2/3]                                                         | 306 |
| 9.41.3.3 ESPSimlCalculator() [3/3]                                                         | 306 |
| 9.41.3.4 ~ESPSimlCalculator()                                                              | 307 |
| 9.41.4 Member Function Documentation                                                       | 307 |
| 9.41.4.1 getDirSiml() [1/2]                                                                | 307 |
| 9.41.4.2 getDirSiml() [2/2]                                                                | 307 |
| 9.41.4.3 getMaxNbNodesInCache()                                                            | 308 |
| 9.41.4.4 getSiml() [1/2]                                                                   | 308 |



|                                                      |     |
|------------------------------------------------------|-----|
| 9.41.4.5 getSiml() [2/2]                             | 308 |
| 9.41.4.6 operator=() [1/2]                           | 309 |
| 9.41.4.7 operator=() [2/2]                           | 309 |
| 9.41.4.8 setMaxNbNodesInCache()                      | 309 |
| 9.42 LinkPred::Simp::Evaluator Class Reference       | 310 |
| 9.42.1 Detailed Description                          | 311 |
| 9.42.2 Constructor & Destructor Documentation        | 311 |
| 9.42.2.1 Evaluator() [1/2]                           | 311 |
| 9.42.2.2 Evaluator() [2/2]                           | 311 |
| 9.42.2.3 ~Evaluator()                                | 311 |
| 9.42.3 Member Function Documentation                 | 311 |
| 9.42.3.1 addADA()                                    | 311 |
| 9.42.3.2 addCNE()                                    | 312 |
| 9.42.3.3 addCRA()                                    | 312 |
| 9.42.3.4 addECL()                                    | 312 |
| 9.42.3.5 addESM()                                    | 313 |
| 9.42.3.6 addFBM()                                    | 313 |
| 9.42.3.7 addHDI()                                    | 314 |
| 9.42.3.8 addHPI()                                    | 314 |
| 9.42.3.9 addHRG()                                    | 314 |
| 9.42.3.10 addHYP()                                   | 315 |
| 9.42.3.11 addJID()                                   | 315 |
| 9.42.3.12 addKAB()                                   | 315 |
| 9.42.3.13 addLCP()                                   | 316 |
| 9.42.3.14 addLHN()                                   | 316 |
| 9.42.3.15 addPAT()                                   | 316 |
| 9.42.3.16 addPR()                                    | 317 |
| 9.42.3.17 addPST()                                   | 317 |
| 9.42.3.18 addRAL()                                   | 317 |
| 9.42.3.19 addRND()                                   | 317 |
| 9.42.3.20 addROC()                                   | 318 |
| 9.42.3.21 addSAI()                                   | 318 |
| 9.42.3.22 addSBM()                                   | 318 |
| 9.42.3.23 addSHP()                                   | 318 |
| 9.42.3.24 addSOI()                                   | 319 |
| 9.42.3.25 addTPR()                                   | 319 |
| 9.42.3.26 genTestData()                              | 319 |
| 9.42.3.27 getPerfRes()                               | 320 |
| 9.42.3.28 run() [1/2]                                | 320 |
| 9.42.3.29 run() [2/2]                                | 320 |
| 9.43 LinkPred::FastSig< T > Class Template Reference | 321 |
| 9.43.1 Detailed Description                          | 321 |

|                                                                      |     |
|----------------------------------------------------------------------|-----|
| 9.43.2 Constructor & Destructor Documentation                        | 321 |
| 9.43.2.1 FastSig() [1/4]                                             | 321 |
| 9.43.2.2 FastSig() [2/4]                                             | 322 |
| 9.43.2.3 FastSig() [3/4]                                             | 322 |
| 9.43.2.4 FastSig() [4/4]                                             | 322 |
| 9.43.2.5 ~FastSig()                                                  | 323 |
| 9.43.3 Member Function Documentation                                 | 323 |
| 9.43.3.1 operator()()                                                | 323 |
| 9.43.3.2 operator=() [1/2]                                           | 323 |
| 9.43.3.3 operator=() [2/2]                                           | 323 |
| 9.44 LinkPred::Simp::Evaluator::Factory::FBMPParams Struct Reference | 324 |
| 9.44.1 Detailed Description                                          | 324 |
| 9.44.2 Member Data Documentation                                     | 324 |
| 9.44.2.1 maxIter                                                     | 324 |
| 9.44.2.2 seed                                                        | 324 |
| 9.45 LinkPred::GCurve< PredResultsT > Class Template Reference       | 325 |
| 9.45.1 Detailed Description                                          | 326 |
| 9.45.2 Member Typedef Documentation                                  | 326 |
| 9.45.2.1 ScoresItT                                                   | 326 |
| 9.45.3 Constructor & Destructor Documentation                        | 327 |
| 9.45.3.1 GCurve() [1/4]                                              | 327 |
| 9.45.3.2 GCurve() [2/4]                                              | 327 |
| 9.45.3.3 GCurve() [3/4]                                              | 327 |
| 9.45.3.4 GCurve() [4/4]                                              | 328 |
| 9.45.3.5 ~GCurve()                                                   | 328 |
| 9.45.4 Member Function Documentation                                 | 328 |
| 9.45.4.1 eval() [1/2]                                                | 328 |
| 9.45.4.2 eval() [2/2]                                                | 329 |
| 9.45.4.3 getCurve() [1/2]                                            | 329 |
| 9.45.4.4 getCurve() [2/2]                                            | 330 |
| 9.45.4.5 getGCurve()                                                 | 330 |
| 9.45.4.6 getGCurveAuc()                                              | 330 |
| 9.45.4.7 getThresholds()                                             | 331 |
| 9.45.4.8 operator=() [1/2]                                           | 331 |
| 9.45.4.9 operator=() [2/2]                                           | 332 |
| 9.46 LinkPred::GFMatrix Class Reference                              | 332 |
| 9.46.1 Detailed Description                                          | 333 |
| 9.46.2 Constructor & Destructor Documentation                        | 333 |
| 9.46.2.1 GFMatrix() [1/4]                                            | 333 |
| 9.46.2.2 GFMatrix() [2/4]                                            | 333 |
| 9.46.2.3 GFMatrix() [3/4]                                            | 334 |
| 9.46.2.4 GFMatrix() [4/4]                                            | 334 |

|                                                   |     |
|---------------------------------------------------|-----|
| 9.46.2.5 $\sim$ GMatrix()                         | 334 |
| 9.46.3 Member Function Documentation              | 334 |
| 9.46.3.1 diag()                                   | 335 |
| 9.46.3.2 elemMult()                               | 335 |
| 9.46.3.3 get()                                    | 335 |
| 9.46.3.4 getCol()                                 | 335 |
| 9.46.3.5 getCols()                                | 336 |
| 9.46.3.6 getM()                                   | 336 |
| 9.46.3.7 getN()                                   | 336 |
| 9.46.3.8 getName()                                | 337 |
| 9.46.3.9 getRow()                                 | 337 |
| 9.46.3.10 getRows()                               | 337 |
| 9.46.3.11 mult() [1/2]                            | 337 |
| 9.46.3.12 mult() [2/2]                            | 338 |
| 9.46.3.13 operator"!="()                          | 338 |
| 9.46.3.14 operator=() [1/2]                       | 339 |
| 9.46.3.15 operator=() [2/2]                       | 339 |
| 9.46.3.16 operator==(())                          | 339 |
| 9.46.3.17 print() [1/2]                           | 339 |
| 9.46.3.18 print() [2/2]                           | 340 |
| 9.46.3.19 removeNaN()                             | 340 |
| 9.46.3.20 set()                                   | 340 |
| 9.46.3.21 setCol()                                | 340 |
| 9.46.3.22 setDiag()                               | 341 |
| 9.46.3.23 setName()                               | 341 |
| 9.46.3.24 setRow()                                | 341 |
| 9.46.3.25 sum()                                   | 341 |
| 9.46.3.26 sumCols()                               | 342 |
| 9.46.3.27 sumRows()                               | 342 |
| 9.46.4 Friends And Related Function Documentation | 342 |
| 9.46.4.1 operator* [1/4]                          | 342 |
| 9.46.4.2 operator* [2/4]                          | 343 |
| 9.46.4.3 operator* [3/4]                          | 343 |
| 9.46.4.4 operator* [4/4]                          | 343 |
| 9.46.4.5 operator+ [1/5]                          | 344 |
| 9.46.4.6 operator+ [2/5]                          | 344 |
| 9.46.4.7 operator+ [3/5]                          | 344 |
| 9.46.4.8 operator+ [4/5]                          | 345 |
| 9.46.4.9 operator+ [5/5]                          | 345 |
| 9.46.4.10 operator- [1/5]                         | 346 |
| 9.46.4.11 operator- [2/5]                         | 346 |
| 9.46.4.12 operator- [3/5]                         | 346 |

|                                                                                  |     |
|----------------------------------------------------------------------------------|-----|
| 9.46.4.13 operator- [4/5]                                                        | 347 |
| 9.46.4.14 operator- [5/5]                                                        | 347 |
| 9.46.4.15 operator/                                                              | 347 |
| 9.47 LinkPred::GraphTraversal< Network, NodeProcessor > Class Template Reference | 348 |
| 9.47.1 Detailed Description                                                      | 348 |
| 9.47.2 Constructor & Destructor Documentation                                    | 348 |
| 9.47.2.1 GraphTraversal() [1/3]                                                  | 349 |
| 9.47.2.2 GraphTraversal() [2/3]                                                  | 349 |
| 9.47.2.3 GraphTraversal() [3/3]                                                  | 349 |
| 9.47.2.4 ~GraphTraversal()                                                       | 349 |
| 9.47.3 Member Function Documentation                                             | 350 |
| 9.47.3.1 operator=() [1/2]                                                       | 350 |
| 9.47.3.2 operator=() [2/2]                                                       | 350 |
| 9.47.3.3 traverse()                                                              | 350 |
| 9.48 LinkPred::HMSM< Network > Class Template Reference                          | 351 |
| 9.48.1 Detailed Description                                                      | 352 |
| 9.48.2 Constructor & Destructor Documentation                                    | 352 |
| 9.48.2.1 HMSM() [1/3]                                                            | 352 |
| 9.48.2.2 HMSM() [2/3]                                                            | 353 |
| 9.48.2.3 HMSM() [3/3]                                                            | 353 |
| 9.48.2.4 ~HMSM()                                                                 | 353 |
| 9.48.3 Member Function Documentation                                             | 353 |
| 9.48.3.1 encode()                                                                | 354 |
| 9.48.3.2 getAlpha()                                                              | 354 |
| 9.48.3.3 getDefaultDim()                                                         | 354 |
| 9.48.3.4 getEps()                                                                | 354 |
| 9.48.3.5 getHProb()                                                              | 354 |
| 9.48.3.6 getLProb()                                                              | 355 |
| 9.48.3.7 getNbMdsRuns()                                                          | 355 |
| 9.48.3.8 getTol()                                                                | 355 |
| 9.48.3.9 init()                                                                  | 355 |
| 9.48.3.10 operator=() [1/2]                                                      | 355 |
| 9.48.3.11 operator=() [2/2]                                                      | 356 |
| 9.48.3.12 setAlpha()                                                             | 356 |
| 9.48.3.13 setEps()                                                               | 356 |
| 9.48.3.14 setHProb()                                                             | 357 |
| 9.48.3.15 setNbMdsRuns()                                                         | 357 |
| 9.48.3.16 setProb()                                                              | 357 |
| 9.48.3.17 setTol()                                                               | 357 |
| 9.48.3.18 setWeightMap()                                                         | 358 |
| 9.49 LinkPred::Simp::Evaluator::Factory::HRGParams Struct Reference              | 358 |
| 9.49.1 Detailed Description                                                      | 358 |

|                                                                     |     |
|---------------------------------------------------------------------|-----|
| 9.49.2 Member Data Documentation                                    | 358 |
| 9.49.2.1 nbBeans                                                    | 359 |
| 9.49.2.2 nbSamples                                                  | 359 |
| 9.49.2.3 seed                                                       | 359 |
| 9.50 LinkPred::Simp::Evaluator::Factory::HYPParams Struct Reference | 359 |
| 9.50.1 Detailed Description                                         | 359 |
| 9.50.2 Member Data Documentation                                    | 359 |
| 9.50.2.1 gamma                                                      | 360 |
| 9.50.2.2 L                                                          | 360 |
| 9.50.2.3 m                                                          | 360 |
| 9.50.2.4 seed                                                       | 360 |
| 9.50.2.5 T                                                          | 360 |
| 9.50.2.6 zeta                                                       | 360 |
| 9.51 LinkPred::Simp::Evaluator::Factory::KABParams Struct Reference | 360 |
| 9.51.1 Detailed Description                                         | 361 |
| 9.51.2 Member Data Documentation                                    | 361 |
| 9.51.2.1 horizLim                                                   | 361 |
| 9.52 LinkPred::L1Sim Class Reference                                | 361 |
| 9.52.1 Detailed Description                                         | 362 |
| 9.52.2 Constructor & Destructor Documentation                       | 362 |
| 9.52.2.1 L1Sim() [1/3]                                              | 362 |
| 9.52.2.2 L1Sim() [2/3]                                              | 362 |
| 9.52.2.3 L1Sim() [3/3]                                              | 363 |
| 9.52.2.4 ~L1Sim()                                                   | 363 |
| 9.52.3 Member Function Documentation                                | 363 |
| 9.52.3.1 operator=() [1/2]                                          | 363 |
| 9.52.3.2 operator=() [2/2]                                          | 363 |
| 9.52.3.3 sim()                                                      | 364 |
| 9.53 LinkPred::L2Sim Class Reference                                | 364 |
| 9.53.1 Detailed Description                                         | 365 |
| 9.53.2 Constructor & Destructor Documentation                       | 365 |
| 9.53.2.1 L2Sim() [1/3]                                              | 365 |
| 9.53.2.2 L2Sim() [2/3]                                              | 365 |
| 9.53.2.3 L2Sim() [3/3]                                              | 366 |
| 9.53.2.4 ~L2Sim()                                                   | 366 |
| 9.53.3 Member Function Documentation                                | 366 |
| 9.53.3.1 operator=() [1/2]                                          | 366 |
| 9.53.3.2 operator=() [2/2]                                          | 366 |
| 9.53.3.3 sim()                                                      | 367 |
| 9.54 LinkPred::LargeVis< Network > Class Template Reference         | 367 |
| 9.54.1 Detailed Description                                         | 369 |
| 9.54.2 Constructor & Destructor Documentation                       | 369 |

|                                                                      |     |
|----------------------------------------------------------------------|-----|
| 9.54.2.1 LargeVis() [1/3]                                            | 369 |
| 9.54.2.2 LargeVis() [2/3]                                            | 369 |
| 9.54.2.3 LargeVis() [3/3]                                            | 370 |
| 9.54.2.4 ~LargeVis()                                                 | 370 |
| 9.54.3 Member Function Documentation                                 | 370 |
| 9.54.3.1 encode()                                                    | 370 |
| 9.54.3.2 getDefaultDim()                                             | 371 |
| 9.54.3.3 getGamma()                                                  | 371 |
| 9.54.3.4 getInitLR()                                                 | 371 |
| 9.54.3.5 getNbNegSamples()                                           | 371 |
| 9.54.3.6 getNbSamples()                                              | 371 |
| 9.54.3.7 getNegSamplingPower()                                       | 371 |
| 9.54.3.8 getNegSize()                                                | 372 |
| 9.54.3.9 init()                                                      | 372 |
| 9.54.3.10 operator=() [1/2]                                          | 372 |
| 9.54.3.11 operator=() [2/2]                                          | 372 |
| 9.54.3.12 setGamma()                                                 | 374 |
| 9.54.3.13 setInitLR()                                                | 374 |
| 9.54.3.14 setNbNegSamples()                                          | 374 |
| 9.54.3.15 setNbSamples() [1/2]                                       | 375 |
| 9.54.3.16 setNbSamples() [2/2]                                       | 375 |
| 9.54.3.17 setNegSamplingPower()                                      | 375 |
| 9.54.3.18 setNegSize()                                               | 375 |
| 9.55 LinkPred::Simp::Evaluator::Factory::LCPPParams Struct Reference | 376 |
| 9.55.1 Detailed Description                                          | 376 |
| 9.55.2 Member Data Documentation                                     | 376 |
| 9.55.2.1 epsilon                                                     | 376 |
| 9.56 LinkPred::LINE< Network > Class Template Reference              | 377 |
| 9.56.1 Detailed Description                                          | 378 |
| 9.56.2 Constructor & Destructor Documentation                        | 378 |
| 9.56.2.1 LINE() [1/3]                                                | 378 |
| 9.56.2.2 LINE() [2/3]                                                | 379 |
| 9.56.2.3 LINE() [3/3]                                                | 379 |
| 9.56.2.4 ~LINE()                                                     | 379 |
| 9.56.3 Member Function Documentation                                 | 379 |
| 9.56.3.1 encode()                                                    | 379 |
| 9.56.3.2 getDefaultDim()                                             | 380 |
| 9.56.3.3 getInitLr()                                                 | 380 |
| 9.56.3.4 getNbNegSamples()                                           | 380 |
| 9.56.3.5 getNegSamplingPower()                                       | 380 |
| 9.56.3.6 getNegSize()                                                | 380 |
| 9.56.3.7 getOrder()                                                  | 381 |

|                                                                                     |     |
|-------------------------------------------------------------------------------------|-----|
| 9.56.3.8 getRecNet()                                                                | 381 |
| 9.56.3.9 getRecWeightMap()                                                          | 381 |
| 9.56.3.10 init()                                                                    | 381 |
| 9.56.3.11 isEnabledReconstruct()                                                    | 382 |
| 9.56.3.12 operator=() [1/2]                                                         | 382 |
| 9.56.3.13 operator=() [2/2]                                                         | 382 |
| 9.56.3.14 setEnableReconstruct()                                                    | 382 |
| 9.56.3.15 setInitLr()                                                               | 383 |
| 9.56.3.16 setNbNegSamples()                                                         | 383 |
| 9.56.3.17 setNegSamplingPower()                                                     | 383 |
| 9.56.3.18 setNegSize()                                                              | 384 |
| 9.56.3.19 setOrder()                                                                | 384 |
| 9.57 LinkPred::LMapQueue< K, P, KComparator, PComparator > Class Template Reference | 384 |
| 9.57.1 Detailed Description                                                         | 385 |
| 9.57.2 Constructor & Destructor Documentation                                       | 385 |
| 9.57.2.1 LMapQueue() [1/3]                                                          | 385 |
| 9.57.2.2 LMapQueue() [2/3]                                                          | 386 |
| 9.57.2.3 LMapQueue() [3/3]                                                          | 386 |
| 9.57.2.4 ~LMapQueue()                                                               | 386 |
| 9.57.3 Member Function Documentation                                                | 387 |
| 9.57.3.1 at() [1/2]                                                                 | 387 |
| 9.57.3.2 at() [2/2]                                                                 | 387 |
| 9.57.3.3 begin() [1/2]                                                              | 387 |
| 9.57.3.4 begin() [2/2]                                                              | 388 |
| 9.57.3.5 cbegin()                                                                   | 388 |
| 9.57.3.6 cend()                                                                     | 388 |
| 9.57.3.7 clear()                                                                    | 388 |
| 9.57.3.8 compareTop()                                                               | 388 |
| 9.57.3.9 count()                                                                    | 389 |
| 9.57.3.10 empty()                                                                   | 389 |
| 9.57.3.11 end() [1/2]                                                               | 389 |
| 9.57.3.12 end() [2/2]                                                               | 390 |
| 9.57.3.13 find()                                                                    | 390 |
| 9.57.3.14 getL()                                                                    | 390 |
| 9.57.3.15 merge()                                                                   | 390 |
| 9.57.3.16 operator=() [1/2]                                                         | 391 |
| 9.57.3.17 operator=() [2/2]                                                         | 391 |
| 9.57.3.18 pop() [1/2]                                                               | 391 |
| 9.57.3.19 pop() [2/2]                                                               | 391 |
| 9.57.3.20 printPQ()                                                                 | 392 |
| 9.57.3.21 push() [1/2]                                                              | 392 |
| 9.57.3.22 push() [2/2]                                                              | 392 |

|                                                                                            |     |
|--------------------------------------------------------------------------------------------|-----|
| 9.57.3.23 size()                                                                           | 393 |
| 9.57.3.24 top()                                                                            | 393 |
| 9.58 LinkPred::Log Class Reference                                                         | 393 |
| 9.58.1 Detailed Description                                                                | 394 |
| 9.58.2 Constructor & Destructor Documentation                                              | 394 |
| 9.58.2.1 Log()                                                                             | 394 |
| 9.58.2.2 ~Log()                                                                            | 394 |
| 9.58.3 Member Function Documentation                                                       | 394 |
| 9.58.3.1 operator<<()                                                                      | 394 |
| 9.58.4 Member Data Documentation                                                           | 395 |
| 9.58.4.1 DefaultLogLevel                                                                   | 395 |
| 9.58.4.2 DefaultOutputStream                                                               | 395 |
| 9.58.4.3 logLevel                                                                          | 395 |
| 9.58.4.4 out                                                                               | 395 |
| 9.59 LinkPred::LogisticRegressor< InRndIt, OutRndIt, ScoreRndIt > Class Template Reference | 396 |
| 9.59.1 Detailed Description                                                                | 397 |
| 9.59.2 Constructor & Destructor Documentation                                              | 397 |
| 9.59.2.1 LogisticRegressor() [1/3]                                                         | 397 |
| 9.59.2.2 LogisticRegressor() [2/3]                                                         | 397 |
| 9.59.2.3 LogisticRegressor() [3/3]                                                         | 398 |
| 9.59.2.4 ~LogisticRegressor()                                                              | 398 |
| 9.59.3 Member Function Documentation                                                       | 398 |
| 9.59.3.1 getLambda()                                                                       | 398 |
| 9.59.3.2 getTheta()                                                                        | 399 |
| 9.59.3.3 getTol()                                                                          | 399 |
| 9.59.3.4 learn()                                                                           | 399 |
| 9.59.3.5 operator=() [1/2]                                                                 | 399 |
| 9.59.3.6 operator=() [2/2]                                                                 | 400 |
| 9.59.3.7 predict()                                                                         | 400 |
| 9.59.3.8 setLambda()                                                                       | 400 |
| 9.59.3.9 setTol()                                                                          | 401 |
| 9.60 LinkPred::LogMDSCG Class Reference                                                    | 401 |
| 9.60.1 Detailed Description                                                                | 402 |
| 9.60.2 Constructor & Destructor Documentation                                              | 402 |
| 9.60.2.1 LogMDSCG() [1/3]                                                                  | 402 |
| 9.60.2.2 LogMDSCG() [2/3]                                                                  | 403 |
| 9.60.2.3 LogMDSCG() [3/3]                                                                  | 403 |
| 9.60.2.4 ~LogMDSCG()                                                                       | 403 |
| 9.60.3 Member Function Documentation                                                       | 404 |
| 9.60.3.1 f()                                                                               | 404 |
| 9.60.3.2 fgrad()                                                                           | 404 |
| 9.60.3.3 finalize()                                                                        | 404 |



|                                                                       |     |
|-----------------------------------------------------------------------|-----|
| 9.60.3.4 grad()                                                       | 405 |
| 9.60.3.5 init()                                                       | 405 |
| 9.60.3.6 operator=() [1/2]                                            | 405 |
| 9.60.3.7 operator=() [2/2]                                            | 406 |
| 9.61 LinkPred::LogRegCG< InRndIt, OutRndIt > Class Template Reference | 406 |
| 9.61.1 Detailed Description                                           | 407 |
| 9.61.2 Constructor & Destructor Documentation                         | 408 |
| 9.61.2.1 LogRegCG() [1/3]                                             | 408 |
| 9.61.2.2 LogRegCG() [2/3]                                             | 408 |
| 9.61.2.3 LogRegCG() [3/3]                                             | 408 |
| 9.61.2.4 ~LogRegCG()                                                  | 409 |
| 9.61.3 Member Function Documentation                                  | 409 |
| 9.61.3.1 f()                                                          | 409 |
| 9.61.3.2 fgrad()                                                      | 409 |
| 9.61.3.3 finalize()                                                   | 410 |
| 9.61.3.4 getLambda()                                                  | 410 |
| 9.61.3.5 grad()                                                       | 411 |
| 9.61.3.6 init()                                                       | 411 |
| 9.61.3.7 operator=() [1/2]                                            | 411 |
| 9.61.3.8 operator=() [2/2]                                            | 412 |
| 9.61.3.9 setLambda()                                                  | 412 |
| 9.62 LinkPred::LPSim Class Reference                                  | 412 |
| 9.62.1 Detailed Description                                           | 413 |
| 9.62.2 Constructor & Destructor Documentation                         | 413 |
| 9.62.2.1 LPSim() [1/3]                                                | 414 |
| 9.62.2.2 LPSim() [2/3]                                                | 414 |
| 9.62.2.3 LPSim() [3/3]                                                | 414 |
| 9.62.2.4 ~LPSim()                                                     | 414 |
| 9.62.3 Member Function Documentation                                  | 414 |
| 9.62.3.1 getP()                                                       | 415 |
| 9.62.3.2 operator=() [1/2]                                            | 415 |
| 9.62.3.3 operator=() [2/2]                                            | 415 |
| 9.62.3.4 setP()                                                       | 415 |
| 9.62.3.5 sim()                                                        | 416 |
| 9.63 LinkPred::MatFact< Network > Class Template Reference            | 416 |
| 9.63.1 Detailed Description                                           | 417 |
| 9.63.2 Constructor & Destructor Documentation                         | 418 |
| 9.63.2.1 MatFact() [1/3]                                              | 418 |
| 9.63.2.2 MatFact() [2/3]                                              | 418 |
| 9.63.2.3 MatFact() [3/3]                                              | 418 |
| 9.63.2.4 ~MatFact()                                                   | 419 |
| 9.63.3 Member Function Documentation                                  | 419 |

|                                               |     |
|-----------------------------------------------|-----|
| 9.63.3.1 encode()                             | 419 |
| 9.63.3.2 getDefaultDim()                      | 419 |
| 9.63.3.3 getLambda()                          | 419 |
| 9.63.3.4 getNegRatio()                        | 420 |
| 9.63.3.5 getPosRatio()                        | 420 |
| 9.63.3.6 getTol()                             | 420 |
| 9.63.3.7 init()                               | 420 |
| 9.63.3.8 operator=() [1/2]                    | 420 |
| 9.63.3.9 operator=() [2/2]                    | 421 |
| 9.63.3.10 setLambda()                         | 421 |
| 9.63.3.11 setNegRatio()                       | 421 |
| 9.63.3.12 setPosRatio()                       | 422 |
| 9.63.3.13 setTol()                            | 422 |
| 9.63.3.14 setWeightMap()                      | 422 |
| 9.64 LinkPred::MatFactCG Class Reference      | 423 |
| 9.64.1 Detailed Description                   | 424 |
| 9.64.2 Constructor & Destructor Documentation | 424 |
| 9.64.2.1 MatFactCG() [1/3]                    | 424 |
| 9.64.2.2 MatFactCG() [2/3]                    | 424 |
| 9.64.2.3 MatFactCG() [3/3]                    | 424 |
| 9.64.2.4 ~MatFactCG()                         | 425 |
| 9.64.3 Member Function Documentation          | 425 |
| 9.64.3.1 f()                                  | 425 |
| 9.64.3.2 fgrad()                              | 425 |
| 9.64.3.3 finalize()                           | 426 |
| 9.64.3.4 grad()                               | 426 |
| 9.64.3.5 init()                               | 426 |
| 9.64.3.6 operator=() [1/2]                    | 427 |
| 9.64.3.7 operator=() [2/2]                    | 427 |
| 9.65 LinkPred::MatFactPbData Struct Reference | 427 |
| 9.65.1 Detailed Description                   | 428 |
| 9.65.2 Member Data Documentation              | 428 |
| 9.65.2.1 i                                    | 428 |
| 9.65.2.2 j                                    | 428 |
| 9.65.2.3 target                               | 428 |
| 9.66 LinkPred::MDS Class Reference            | 428 |
| 9.66.1 Detailed Description                   | 429 |
| 9.66.2 Constructor & Destructor Documentation | 429 |
| 9.66.2.1 MDS() [1/2]                          | 429 |
| 9.66.2.2 MDS() [2/2]                          | 429 |
| 9.66.2.3 ~MDS()                               | 430 |
| 9.66.3 Member Function Documentation          | 430 |

|          |                                                                                                                |     |
|----------|----------------------------------------------------------------------------------------------------------------|-----|
| 9.66.3.1 | <a href="#">cgMDS()</a>                                                                                        | 430 |
| 9.66.3.2 | <a href="#">getAlg()</a>                                                                                       | 430 |
| 9.66.3.3 | <a href="#">getNbRuns()</a>                                                                                    | 431 |
| 9.66.3.4 | <a href="#">getTol()</a>                                                                                       | 431 |
| 9.66.3.5 | <a href="#">setAlg()</a>                                                                                       | 431 |
| 9.66.3.6 | <a href="#">setNbRuns()</a>                                                                                    | 431 |
| 9.66.3.7 | <a href="#">setTol()</a>                                                                                       | 432 |
| 9.66.3.8 | <a href="#">solve()</a>                                                                                        | 432 |
| 9.67     | <a href="#">LinkPred::NetDistCalculator&lt; Network, DistType, NbHopsType &gt; Class Template Reference</a>    | 433 |
| 9.67.1   | <a href="#">Detailed Description</a>                                                                           | 433 |
| 9.67.2   | <a href="#">Member Typedef Documentation</a>                                                                   | 433 |
| 9.67.2.1 | <a href="#">Edge</a>                                                                                           | 434 |
| 9.67.2.2 | <a href="#">EdgeLengthMap</a>                                                                                  | 434 |
| 9.67.2.3 | <a href="#">EdgeLengthMapSP</a>                                                                                | 434 |
| 9.67.2.4 | <a href="#">Label</a>                                                                                          | 434 |
| 9.67.2.5 | <a href="#">LengthMapIdType</a>                                                                                | 434 |
| 9.67.2.6 | <a href="#">NetworkSP</a>                                                                                      | 434 |
| 9.67.2.7 | <a href="#">NodeDistMap</a>                                                                                    | 435 |
| 9.67.2.8 | <a href="#">NodeDistMapSP</a>                                                                                  | 435 |
| 9.67.2.9 | <a href="#">NodeID</a>                                                                                         | 435 |
| 9.67.3   | <a href="#">Constructor &amp; Destructor Documentation</a>                                                     | 435 |
| 9.67.3.1 | <a href="#">~NetDistCalculator()</a>                                                                           | 435 |
| 9.67.4   | <a href="#">Member Function Documentation</a>                                                                  | 435 |
| 9.67.4.1 | <a href="#">getDiscDist()</a>                                                                                  | 435 |
| 9.67.4.2 | <a href="#">getDiscNbHops()</a>                                                                                | 436 |
| 9.67.4.3 | <a href="#">getDist()</a> [1/2]                                                                                | 436 |
| 9.67.4.4 | <a href="#">getDist()</a> [2/2]                                                                                | 436 |
| 9.67.4.5 | <a href="#">getIndDist()</a>                                                                                   | 437 |
| 9.67.4.6 | <a href="#">getMaxDist()</a>                                                                                   | 437 |
| 9.67.4.7 | <a href="#">setDiscDist()</a>                                                                                  | 437 |
| 9.67.4.8 | <a href="#">setDiscNbHops()</a>                                                                                | 438 |
| 9.68     | <a href="#">LinkPred::NetIndSimlCalculator&lt; Network, DistType, NbHopsType &gt; Class Template Reference</a> | 438 |
| 9.68.1   | <a href="#">Detailed Description</a>                                                                           | 439 |
| 9.68.2   | <a href="#">Member Typedef Documentation</a>                                                                   | 439 |
| 9.68.2.1 | <a href="#">Edge</a>                                                                                           | 439 |
| 9.68.2.2 | <a href="#">EdgeLengthMap</a>                                                                                  | 439 |
| 9.68.2.3 | <a href="#">EdgeLengthMapSP</a>                                                                                | 439 |
| 9.68.2.4 | <a href="#">Label</a>                                                                                          | 439 |
| 9.68.2.5 | <a href="#">LengthMapIdType</a>                                                                                | 440 |
| 9.68.2.6 | <a href="#">NetworkSP</a>                                                                                      | 440 |
| 9.68.2.7 | <a href="#">NodeID</a>                                                                                         | 440 |
| 9.68.3   | <a href="#">Constructor &amp; Destructor Documentation</a>                                                     | 440 |

|                                                                                                               |     |
|---------------------------------------------------------------------------------------------------------------|-----|
| 9.68.3.1 <code>~NetIndSimlCalculator()</code>                                                                 | 440 |
| 9.68.4 Member Function Documentation                                                                          | 440 |
| 9.68.4.1 <code>getDirIndSiml()</code>                                                                         | 440 |
| 9.68.4.2 <code>getDiscDist()</code>                                                                           | 441 |
| 9.68.4.3 <code>getDiscNbHops()</code>                                                                         | 441 |
| 9.68.4.4 <code>getIndSiml()</code>                                                                            | 441 |
| 9.68.4.5 <code>getLambda()</code>                                                                             | 442 |
| 9.68.4.6 <code>getSelfSiml()</code>                                                                           | 442 |
| 9.68.4.7 <code>setDiscDist()</code>                                                                           | 442 |
| 9.68.4.8 <code>setDiscNbHops()</code>                                                                         | 442 |
| 9.68.4.9 <code>setLambda()</code>                                                                             | 443 |
| 9.68.4.10 <code>setSelfSiml()</code>                                                                          | 443 |
| 9.69 <code>LinkPred::NetSimlCalculator&lt; Network, DistType, NbHopsType &gt;</code> Class Template Reference | 443 |
| 9.69.1 Detailed Description                                                                                   | 444 |
| 9.69.2 Member Typedef Documentation                                                                           | 444 |
| 9.69.2.1 <code>Edge</code>                                                                                    | 445 |
| 9.69.2.2 <code>EdgeLengthMap</code>                                                                           | 445 |
| 9.69.2.3 <code>EdgeLengthMapSP</code>                                                                         | 445 |
| 9.69.2.4 <code>Label</code>                                                                                   | 445 |
| 9.69.2.5 <code>LengthMapIdType</code>                                                                         | 445 |
| 9.69.2.6 <code>NetworkSP</code>                                                                               | 445 |
| 9.69.2.7 <code>NodeId</code>                                                                                  | 446 |
| 9.69.2.8 <code>NodeSDistMap</code>                                                                            | 446 |
| 9.69.2.9 <code>NodeSDistMapSP</code>                                                                          | 446 |
| 9.69.3 Constructor & Destructor Documentation                                                                 | 446 |
| 9.69.3.1 <code>~NetSimlCalculator()</code>                                                                    | 446 |
| 9.69.4 Member Function Documentation                                                                          | 446 |
| 9.69.4.1 <code>getDirSiml()</code>                                                                            | 446 |
| 9.69.4.2 <code>getDiscDist()</code>                                                                           | 447 |
| 9.69.4.3 <code>getDiscNbHops()</code>                                                                         | 447 |
| 9.69.4.4 <code>getLambda()</code>                                                                             | 447 |
| 9.69.4.5 <code>getNnzSimlMap()</code>                                                                         | 447 |
| 9.69.4.6 <code>getNnzSimlMapNoNeighb()</code>                                                                 | 448 |
| 9.69.4.7 <code>getSelfSiml()</code>                                                                           | 448 |
| 9.69.4.8 <code>getSiml()</code>                                                                               | 448 |
| 9.69.4.9 <code>setDiscDist()</code>                                                                           | 449 |
| 9.69.4.10 <code>setDiscNbHops()</code>                                                                        | 449 |
| 9.69.4.11 <code>setLambda()</code>                                                                            | 449 |
| 9.69.4.12 <code>setSelfSiml()</code>                                                                          | 450 |
| 9.70 <code>LinkPred::NetworkManipulator&lt; Network &gt;</code> Class Template Reference                      | 450 |
| 9.70.1 Detailed Description                                                                                   | 451 |
| 9.70.2 Member Typedef Documentation                                                                           | 452 |

|                                                             |     |
|-------------------------------------------------------------|-----|
| 9.70.2.1 Edge                                               | 452 |
| 9.70.2.2 EdgeMap                                            | 452 |
| 9.70.2.3 Label                                              | 452 |
| 9.70.2.4 NetworkCSP                                         | 452 |
| 9.70.2.5 NetworkSP                                          | 452 |
| 9.70.2.6 NodeID                                             | 453 |
| 9.70.2.7 NodeMap                                            | 453 |
| 9.70.3 Constructor & Destructor Documentation               | 453 |
| 9.70.3.1 NetworkManipulator()                               | 453 |
| 9.70.3.2 ~NetworkManipulator()                              | 453 |
| 9.70.4 Member Function Documentation                        | 453 |
| 9.70.4.1 createTestData() [1/2]                             | 453 |
| 9.70.4.2 createTestData() [2/2]                             | 454 |
| 9.70.4.3 createTestDataAdd() [1/2]                          | 455 |
| 9.70.4.4 createTestDataAdd() [2/2]                          | 455 |
| 9.70.4.5 createTestDataRem() [1/2]                          | 456 |
| 9.70.4.6 createTestDataRem() [2/2]                          | 457 |
| 9.70.4.7 createTestDataSeq()                                | 457 |
| 9.70.4.8 createTestDataSeqInter()                           | 458 |
| 9.70.4.9 getAllNegLinksExcept()                             | 459 |
| 9.70.4.10 getRndNegLinksExcept()                            | 459 |
| 9.70.4.11 getRndPosLinksExcept()                            | 459 |
| 9.70.4.12 isConnected()                                     | 460 |
| 9.70.4.13 loadTestData()                                    | 460 |
| 9.70.4.14 loadTestDataAdd()                                 | 462 |
| 9.70.4.15 loadTestDataRem()                                 | 462 |
| 9.70.4.16 rndConExtract()                                   | 463 |
| 9.70.4.17 rndExtract()                                      | 463 |
| 9.70.4.18 rst()                                             | 464 |
| 9.71 LinkPred::Node2Vec< Network > Class Template Reference | 464 |
| 9.71.1 Detailed Description                                 | 466 |
| 9.71.2 Constructor & Destructor Documentation               | 466 |
| 9.71.2.1 Node2Vec() [1/3]                                   | 466 |
| 9.71.2.2 Node2Vec() [2/3]                                   | 467 |
| 9.71.2.3 Node2Vec() [3/3]                                   | 467 |
| 9.71.2.4 ~Node2Vec()                                        | 467 |
| 9.71.3 Member Function Documentation                        | 467 |
| 9.71.3.1 encode()                                           | 468 |
| 9.71.3.2 getDefaultDim()                                    | 468 |
| 9.71.3.3 getInitLR()                                        | 468 |
| 9.71.3.4 getNbNegSamples()                                  | 468 |
| 9.71.3.5 getNbWalks()                                       | 469 |

|           |                                                                                               |     |
|-----------|-----------------------------------------------------------------------------------------------|-----|
| 9.71.3.6  | <a href="#">getP()</a>                                                                        | 469 |
| 9.71.3.7  | <a href="#">getQ()</a>                                                                        | 469 |
| 9.71.3.8  | <a href="#">getStepInterval()</a>                                                             | 469 |
| 9.71.3.9  | <a href="#">getSubSample()</a>                                                                | 470 |
| 9.71.3.10 | <a href="#">getTotalSteps()</a>                                                               | 470 |
| 9.71.3.11 | <a href="#">getWalkLength()</a>                                                               | 470 |
| 9.71.3.12 | <a href="#">getWindowSize()</a>                                                               | 470 |
| 9.71.3.13 | <a href="#">init()</a>                                                                        | 470 |
| 9.71.3.14 | <a href="#">operator=()</a> [1/2]                                                             | 470 |
| 9.71.3.15 | <a href="#">operator=()</a> [2/2]                                                             | 471 |
| 9.71.3.16 | <a href="#">setInitLR()</a>                                                                   | 471 |
| 9.71.3.17 | <a href="#">setNbNegSamples()</a>                                                             | 471 |
| 9.71.3.18 | <a href="#">setNbWalks()</a>                                                                  | 472 |
| 9.71.3.19 | <a href="#">setP()</a>                                                                        | 472 |
| 9.71.3.20 | <a href="#">setQ()</a>                                                                        | 472 |
| 9.71.3.21 | <a href="#">setStepInterval()</a>                                                             | 472 |
| 9.71.3.22 | <a href="#">setSubSample()</a>                                                                | 473 |
| 9.71.3.23 | <a href="#">setWalkLength()</a>                                                               | 473 |
| 9.71.3.24 | <a href="#">setWeightMap()</a>                                                                | 473 |
| 9.71.3.25 | <a href="#">setWindowSize()</a>                                                               | 474 |
| 9.72      | <a href="#">LinkPred::DNetwork&lt; LabelT, NodeIDT, EdgeT &gt;::NodeDegIt Class Reference</a> | 474 |
| 9.72.1    | <a href="#">Detailed Description</a>                                                          | 475 |
| 9.72.2    | <a href="#">Member Typedef Documentation</a>                                                  | 475 |
| 9.72.2.1  | <a href="#">difference_type</a>                                                               | 476 |
| 9.72.2.2  | <a href="#">pointer</a>                                                                       | 476 |
| 9.72.2.3  | <a href="#">reference</a>                                                                     | 476 |
| 9.72.3    | <a href="#">Constructor &amp; Destructor Documentation</a>                                    | 476 |
| 9.72.3.1  | <a href="#">NodeDegIt()</a> [1/2]                                                             | 476 |
| 9.72.3.2  | <a href="#">NodeDegIt()</a> [2/2]                                                             | 477 |
| 9.72.4    | <a href="#">Member Function Documentation</a>                                                 | 477 |
| 9.72.4.1  | <a href="#">operator!=(())</a>                                                                | 477 |
| 9.72.4.2  | <a href="#">operator*()</a>                                                                   | 477 |
| 9.72.4.3  | <a href="#">operator+()</a>                                                                   | 478 |
| 9.72.4.4  | <a href="#">operator++()</a> [1/2]                                                            | 478 |
| 9.72.4.5  | <a href="#">operator++()</a> [2/2]                                                            | 478 |
| 9.72.4.6  | <a href="#">operator+=()</a>                                                                  | 478 |
| 9.72.4.7  | <a href="#">operator-()</a> [1/2]                                                             | 479 |
| 9.72.4.8  | <a href="#">operator-()</a> [2/2]                                                             | 479 |
| 9.72.4.9  | <a href="#">operator--()</a> [1/2]                                                            | 480 |
| 9.72.4.10 | <a href="#">operator--()</a> [2/2]                                                            | 480 |
| 9.72.4.11 | <a href="#">operator-=()</a>                                                                  | 480 |
| 9.72.4.12 | <a href="#">operator-&gt;()</a>                                                               | 481 |

|                                                                                                  |     |
|--------------------------------------------------------------------------------------------------|-----|
| 9.72.4.13 operator<>()                                                                           | 481 |
| 9.72.4.14 operator<=>()                                                                          | 481 |
| 9.72.4.15 operator=() [1/2]                                                                      | 482 |
| 9.72.4.16 operator=() [2/2]                                                                      | 482 |
| 9.72.4.17 operator==()                                                                           | 482 |
| 9.72.4.18 operator>()                                                                            | 483 |
| 9.72.4.19 operator>=()                                                                           | 483 |
| 9.72.5 Friends And Related Function Documentation                                                | 483 |
| 9.72.5.1 DNetwork                                                                                | 483 |
| 9.73 LinkPred::UNetwork< LabelT, NodeIDT, EdgeT >::NodeDegIt Class Reference                     | 484 |
| 9.73.1 Detailed Description                                                                      | 485 |
| 9.73.2 Member Typedef Documentation                                                              | 485 |
| 9.73.2.1 difference_type                                                                         | 485 |
| 9.73.2.2 pointer                                                                                 | 485 |
| 9.73.2.3 reference                                                                               | 486 |
| 9.73.3 Constructor & Destructor Documentation                                                    | 486 |
| 9.73.3.1 NodeDegIt() [1/2]                                                                       | 486 |
| 9.73.3.2 NodeDegIt() [2/2]                                                                       | 486 |
| 9.73.4 Member Function Documentation                                                             | 486 |
| 9.73.4.1 operator!=(())                                                                          | 487 |
| 9.73.4.2 operator*()                                                                             | 487 |
| 9.73.4.3 operator+()                                                                             | 487 |
| 9.73.4.4 operator++() [1/2]                                                                      | 488 |
| 9.73.4.5 operator++() [2/2]                                                                      | 488 |
| 9.73.4.6 operator+=()                                                                            | 488 |
| 9.73.4.7 operator-() [1/2]                                                                       | 489 |
| 9.73.4.8 operator-() [2/2]                                                                       | 489 |
| 9.73.4.9 operator--() [1/2]                                                                      | 489 |
| 9.73.4.10 operator--() [2/2]                                                                     | 490 |
| 9.73.4.11 operator-=()                                                                           | 490 |
| 9.73.4.12 operator->()                                                                           | 490 |
| 9.73.4.13 operator<()                                                                            | 490 |
| 9.73.4.14 operator<=()                                                                           | 491 |
| 9.73.4.15 operator=() [1/2]                                                                      | 491 |
| 9.73.4.16 operator=() [2/2]                                                                      | 491 |
| 9.73.4.17 operator==()                                                                           | 493 |
| 9.73.4.18 operator>()                                                                            | 493 |
| 9.73.4.19 operator>=()                                                                           | 493 |
| 9.73.5 Friends And Related Function Documentation                                                | 494 |
| 9.73.5.1 UNetwork                                                                                | 494 |
| 9.74 LinkPred::UNetwork< LabelT, NodeIDT, EdgeT >::NodeMap< ValueType > Class Template Reference | 494 |
| 9.74.1 Detailed Description                                                                      | 495 |

|                                                                                                   |     |
|---------------------------------------------------------------------------------------------------|-----|
| 9.74.2 Member Typedef Documentation                                                               | 495 |
| 9.74.2.1 NodeMapConstIt                                                                           | 495 |
| 9.74.2.2 NodeMapIt                                                                                | 495 |
| 9.74.3 Constructor & Destructor Documentation                                                     | 495 |
| 9.74.3.1 NodeMap() [1/2]                                                                          | 496 |
| 9.74.3.2 NodeMap() [2/2]                                                                          | 496 |
| 9.74.3.3 ~NodeMap()                                                                               | 496 |
| 9.74.4 Member Function Documentation                                                              | 496 |
| 9.74.4.1 at()                                                                                     | 496 |
| 9.74.4.2 begin()                                                                                  | 497 |
| 9.74.4.3 cbegin()                                                                                 | 497 |
| 9.74.4.4 cend()                                                                                   | 497 |
| 9.74.4.5 end()                                                                                    | 498 |
| 9.74.4.6 operator=() [1/2]                                                                        | 498 |
| 9.74.4.7 operator=() [2/2]                                                                        | 498 |
| 9.74.4.8 operator[]() [1/2]                                                                       | 498 |
| 9.74.4.9 operator[]() [2/2]                                                                       | 499 |
| 9.75 LinkPred::DNetwork< LabelT, NodeIDT, EdgeT >::NodeMap< ValueType > Class Template Reference  | 499 |
| 9.75.1 Detailed Description                                                                       | 500 |
| 9.75.2 Member Typedef Documentation                                                               | 500 |
| 9.75.2.1 NodeMapConstIt                                                                           | 500 |
| 9.75.2.2 NodeMapIt                                                                                | 501 |
| 9.75.3 Constructor & Destructor Documentation                                                     | 501 |
| 9.75.3.1 NodeMap() [1/2]                                                                          | 501 |
| 9.75.3.2 NodeMap() [2/2]                                                                          | 501 |
| 9.75.3.3 ~NodeMap()                                                                               | 501 |
| 9.75.4 Member Function Documentation                                                              | 502 |
| 9.75.4.1 at()                                                                                     | 502 |
| 9.75.4.2 begin()                                                                                  | 502 |
| 9.75.4.3 cbegin()                                                                                 | 502 |
| 9.75.4.4 cend()                                                                                   | 503 |
| 9.75.4.5 end()                                                                                    | 503 |
| 9.75.4.6 operator=() [1/2]                                                                        | 503 |
| 9.75.4.7 operator=() [2/2]                                                                        | 503 |
| 9.75.4.8 operator[]() [1/2]                                                                       | 504 |
| 9.75.4.9 operator[]() [2/2]                                                                       | 504 |
| 9.76 LinkPred::DNetwork< LabelT, NodeIDT, EdgeT >::NodeSMap< ValueType > Class Template Reference | 505 |
| 9.76.1 Detailed Description                                                                       | 505 |
| 9.76.2 Member Typedef Documentation                                                               | 506 |
| 9.76.2.1 NodeSMapConstIterator                                                                    | 506 |
| 9.76.2.2 NodeSMapIterator                                                                         | 506 |



|                                                                                                   |     |
|---------------------------------------------------------------------------------------------------|-----|
| 9.76.3 Constructor & Destructor Documentation                                                     | 506 |
| 9.76.3.1 NodeSMap() [1/2]                                                                         | 506 |
| 9.76.3.2 NodeSMap() [2/2]                                                                         | 506 |
| 9.76.3.3 ~NodeSMap()                                                                              | 507 |
| 9.76.4 Member Function Documentation                                                              | 507 |
| 9.76.4.1 at()                                                                                     | 507 |
| 9.76.4.2 begin()                                                                                  | 507 |
| 9.76.4.3 cbegin()                                                                                 | 508 |
| 9.76.4.4 cend()                                                                                   | 508 |
| 9.76.4.5 end()                                                                                    | 508 |
| 9.76.4.6 find()                                                                                   | 508 |
| 9.76.4.7 operator=() [1/2]                                                                        | 509 |
| 9.76.4.8 operator=() [2/2]                                                                        | 509 |
| 9.76.4.9 operator[]() [1/2]                                                                       | 509 |
| 9.76.4.10 operator[]() [2/2]                                                                      | 510 |
| 9.76.4.11 size()                                                                                  | 510 |
| 9.77 LinkPred::UNetwork< LabelT, NodeIDT, EdgeT >::NodeSMap< ValueType > Class Template Reference | 510 |
| 9.77.1 Detailed Description                                                                       | 511 |
| 9.77.2 Member Typedef Documentation                                                               | 511 |
| 9.77.2.1 NodeSMapConstIterator                                                                    | 511 |
| 9.77.2.2 NodeSMapIterator                                                                         | 512 |
| 9.77.3 Constructor & Destructor Documentation                                                     | 512 |
| 9.77.3.1 NodeSMap() [1/2]                                                                         | 512 |
| 9.77.3.2 NodeSMap() [2/2]                                                                         | 512 |
| 9.77.3.3 ~NodeSMap()                                                                              | 513 |
| 9.77.4 Member Function Documentation                                                              | 513 |
| 9.77.4.1 at()                                                                                     | 513 |
| 9.77.4.2 begin()                                                                                  | 513 |
| 9.77.4.3 cbegin()                                                                                 | 514 |
| 9.77.4.4 cend()                                                                                   | 514 |
| 9.77.4.5 end()                                                                                    | 514 |
| 9.77.4.6 find()                                                                                   | 514 |
| 9.77.4.7 operator=() [1/2]                                                                        | 515 |
| 9.77.4.8 operator=() [2/2]                                                                        | 515 |
| 9.77.4.9 operator[]() [1/2]                                                                       | 515 |
| 9.77.4.10 operator[]() [2/2]                                                                      | 516 |
| 9.77.4.11 size()                                                                                  | 516 |
| 9.78 LinkPred::UNetwork< LabelT, NodeIDT, EdgeT >::NonEdgeIt Class Reference                      | 517 |
| 9.78.1 Detailed Description                                                                       | 518 |
| 9.78.2 Member Typedef Documentation                                                               | 518 |
| 9.78.2.1 difference_type                                                                          | 518 |

|                                                                              |     |
|------------------------------------------------------------------------------|-----|
| 9.78.2.2 pointer                                                             | 519 |
| 9.78.2.3 reference                                                           | 519 |
| 9.78.3 Constructor & Destructor Documentation                                | 519 |
| 9.78.3.1 NonEdgeIt() [1/2]                                                   | 519 |
| 9.78.3.2 NonEdgeIt() [2/2]                                                   | 519 |
| 9.78.4 Member Function Documentation                                         | 520 |
| 9.78.4.1 operator"!=( )                                                      | 520 |
| 9.78.4.2 operator*( )                                                        | 520 |
| 9.78.4.3 operator+( )                                                        | 520 |
| 9.78.4.4 operator++( ) [1/2]                                                 | 521 |
| 9.78.4.5 operator++( ) [2/2]                                                 | 521 |
| 9.78.4.6 operator+=( )                                                       | 521 |
| 9.78.4.7 operator-( ) [1/2]                                                  | 522 |
| 9.78.4.8 operator-( ) [2/2]                                                  | 522 |
| 9.78.4.9 operator--( ) [1/2]                                                 | 522 |
| 9.78.4.10 operator--( ) [2/2]                                                | 523 |
| 9.78.4.11 operator--=( )                                                     | 523 |
| 9.78.4.12 operator->( )                                                      | 523 |
| 9.78.4.13 operator<( )                                                       | 524 |
| 9.78.4.14 operator<=( )                                                      | 524 |
| 9.78.4.15 operator=( ) [1/2]                                                 | 524 |
| 9.78.4.16 operator=( ) [2/2]                                                 | 525 |
| 9.78.4.17 operator==( )                                                      | 525 |
| 9.78.4.18 operator>( )                                                       | 525 |
| 9.78.4.19 operator>=( )                                                      | 526 |
| 9.78.5 Friends And Related Function Documentation                            | 526 |
| 9.78.5.1 UNetwork                                                            | 526 |
| 9.79 LinkPred::DNetwork< LabelT, NodeIDT, EdgeT >::NonEdgeIt Class Reference | 526 |
| 9.79.1 Detailed Description                                                  | 528 |
| 9.79.2 Member Typedef Documentation                                          | 528 |
| 9.79.2.1 difference_type                                                     | 528 |
| 9.79.2.2 pointer                                                             | 528 |
| 9.79.2.3 reference                                                           | 528 |
| 9.79.3 Constructor & Destructor Documentation                                | 528 |
| 9.79.3.1 NonEdgeIt() [1/2]                                                   | 528 |
| 9.79.3.2 NonEdgeIt() [2/2]                                                   | 529 |
| 9.79.4 Member Function Documentation                                         | 529 |
| 9.79.4.1 operator"!=( )                                                      | 529 |
| 9.79.4.2 operator*( )                                                        | 529 |
| 9.79.4.3 operator+( )                                                        | 530 |
| 9.79.4.4 operator++( ) [1/2]                                                 | 530 |
| 9.79.4.5 operator++( ) [2/2]                                                 | 530 |

|                                                                                                    |     |
|----------------------------------------------------------------------------------------------------|-----|
| 9.79.4.6 operator+=( )                                                                             | 531 |
| 9.79.4.7 operator-( ) [1/2]                                                                        | 531 |
| 9.79.4.8 operator-( ) [2/2]                                                                        | 531 |
| 9.79.4.9 operator--( ) [1/2]                                                                       | 532 |
| 9.79.4.10 operator--( ) [2/2]                                                                      | 532 |
| 9.79.4.11 operator-=( )                                                                            | 532 |
| 9.79.4.12 operator->( )                                                                            | 533 |
| 9.79.4.13 operator<( )                                                                             | 533 |
| 9.79.4.14 operator<=( )                                                                            | 533 |
| 9.79.4.15 operator=( ) [1/2]                                                                       | 534 |
| 9.79.4.16 operator=( ) [2/2]                                                                       | 534 |
| 9.79.4.17 operator==( )                                                                            | 534 |
| 9.79.4.18 operator>( )                                                                             | 535 |
| 9.79.4.19 operator>=( )                                                                            | 535 |
| 9.79.5 Friends And Related Function Documentation                                                  | 535 |
| 9.79.5.1 DNetwork                                                                                  | 535 |
| 9.80 LinkPred::Utils::PairCompRight< FirstT, SecondT, CompareT > Struct Template Reference         | 536 |
| 9.80.1 Detailed Description                                                                        | 536 |
| 9.80.2 Member Function Documentation                                                               | 536 |
| 9.80.2.1 operator()( )                                                                             | 536 |
| 9.81 LinkPred::Pearson Class Reference                                                             | 537 |
| 9.81.1 Detailed Description                                                                        | 538 |
| 9.81.2 Constructor & Destructor Documentation                                                      | 538 |
| 9.81.2.1 Pearson() [1/3]                                                                           | 538 |
| 9.81.2.2 Pearson() [2/3]                                                                           | 538 |
| 9.81.2.3 Pearson() [3/3]                                                                           | 538 |
| 9.81.2.4 ~Pearson()                                                                                | 538 |
| 9.81.3 Member Function Documentation                                                               | 539 |
| 9.81.3.1 operator=( ) [1/2]                                                                        | 539 |
| 9.81.3.2 operator=( ) [2/2]                                                                        | 539 |
| 9.81.3.3 sim()                                                                                     | 539 |
| 9.82 LinkPred::PEFactory< Network, LPredictorT, TestDataT, PerfMeasureT > Class Template Reference | 540 |
| 9.82.1 Detailed Description                                                                        | 540 |
| 9.82.2 Constructor & Destructor Documentation                                                      | 540 |
| 9.82.2.1 ~PEFactory()                                                                              | 540 |
| 9.82.3 Member Function Documentation                                                               | 541 |
| 9.82.3.1 getPerfMeasures()                                                                         | 541 |
| 9.82.3.2 getPredictors()                                                                           | 541 |
| 9.83 LinkPred::PerfCurve< PredResultsT > Class Template Reference                                  | 541 |
| 9.83.1 Detailed Description                                                                        | 543 |
| 9.83.2 Member Typedef Documentation                                                                | 543 |
| 9.83.2.1 ScoresItT                                                                                 | 543 |

|                                                                                                                    |     |
|--------------------------------------------------------------------------------------------------------------------|-----|
| 9.83.3 Constructor & Destructor Documentation                                                                      | 543 |
| 9.83.3.1 PerfCurve() [1/4]                                                                                         | 543 |
| 9.83.3.2 PerfCurve() [2/4]                                                                                         | 543 |
| 9.83.3.3 PerfCurve() [3/4]                                                                                         | 544 |
| 9.83.3.4 PerfCurve() [4/4]                                                                                         | 544 |
| 9.83.3.5 ~PerfCurve()                                                                                              | 544 |
| 9.83.4 Member Function Documentation                                                                               | 544 |
| 9.83.4.1 eval() [1/2]                                                                                              | 545 |
| 9.83.4.2 eval() [2/2]                                                                                              | 545 |
| 9.83.4.3 getCurve() [1/2]                                                                                          | 545 |
| 9.83.4.4 getCurve() [2/2]                                                                                          | 546 |
| 9.83.4.5 operator=() [1/2]                                                                                         | 546 |
| 9.83.4.6 operator=() [2/2]                                                                                         | 547 |
| 9.84 LinkPred::PerfEvalExpDesc< Network > Struct Template Reference                                                | 547 |
| 9.84.1 Detailed Description                                                                                        | 547 |
| 9.84.2 Member Data Documentation                                                                                   | 548 |
| 9.84.2.1 fnRatio                                                                                                   | 548 |
| 9.84.2.2 keepConnected                                                                                             | 548 |
| 9.84.2.3 nbTestRuns                                                                                                | 548 |
| 9.84.2.4 out                                                                                                       | 548 |
| 9.84.2.5 ratioEnd                                                                                                  | 548 |
| 9.84.2.6 ratioStart                                                                                                | 548 |
| 9.84.2.7 ratioStep                                                                                                 | 549 |
| 9.84.2.8 refNet                                                                                                    | 549 |
| 9.84.2.9 seed                                                                                                      | 549 |
| 9.84.2.10 timingEnabled                                                                                            | 549 |
| 9.84.2.11 tnRatio                                                                                                  | 549 |
| 9.85 LinkPred::PerfEvalExp< Network, TestDataT, LPredictorT, PredResultsT, PerfMeasureT > Class Template Reference | 549 |
| 9.85.1 Detailed Description                                                                                        | 550 |
| 9.85.2 Constructor & Destructor Documentation                                                                      | 550 |
| 9.85.2.1 PerfEvalExp() [1/3]                                                                                       | 550 |
| 9.85.2.2 PerfEvalExp() [2/3]                                                                                       | 551 |
| 9.85.2.3 PerfEvalExp() [3/3]                                                                                       | 551 |
| 9.85.2.4 ~PerfEvalExp()                                                                                            | 551 |
| 9.85.3 Member Function Documentation                                                                               | 552 |
| 9.85.3.1 getFactory()                                                                                              | 552 |
| 9.85.3.2 getOutPrec()                                                                                              | 552 |
| 9.85.3.3 getPed()                                                                                                  | 552 |
| 9.85.3.4 operator=() [1/2]                                                                                         | 553 |
| 9.85.3.5 operator=() [2/2]                                                                                         | 553 |
| 9.85.3.6 resultsBegin()                                                                                            | 553 |

|                                                                                                             |     |
|-------------------------------------------------------------------------------------------------------------|-----|
| 9.85.3.7 resultsEnd()                                                                                       | 554 |
| 9.85.3.8 run()                                                                                              | 554 |
| 9.85.3.9 runNoTiming()                                                                                      | 554 |
| 9.85.3.10 runTiming()                                                                                       | 554 |
| 9.85.3.11 setOutPrec()                                                                                      | 554 |
| 9.86 LinkPred::PerfEvaluator< TestDataT, LPredictorT, PredResultsT, PerfMeasureT > Class Template Reference | 555 |
| 9.86.1 Detailed Description                                                                                 | 555 |
| 9.86.2 Constructor & Destructor Documentation                                                               | 556 |
| 9.86.2.1 PerfEvaluator() [1/3]                                                                              | 556 |
| 9.86.2.2 PerfEvaluator() [2/3]                                                                              | 556 |
| 9.86.2.3 PerfEvaluator() [3/3]                                                                              | 556 |
| 9.86.2.4 ~PerfEvaluator()                                                                                   | 557 |
| 9.86.3 Member Function Documentation                                                                        | 557 |
| 9.86.3.1 addPerfMeasure()                                                                                   | 557 |
| 9.86.3.2 addPredictor()                                                                                     | 557 |
| 9.86.3.3 eval()                                                                                             | 559 |
| 9.86.3.4 evalNoTiming()                                                                                     | 559 |
| 9.86.3.5 evalTiming()                                                                                       | 559 |
| 9.86.3.6 getNbPerfMeasures()                                                                                | 559 |
| 9.86.3.7 getNbPredictors()                                                                                  | 560 |
| 9.86.3.8 getPredictor()                                                                                     | 560 |
| 9.86.3.9 isTimingEnabled()                                                                                  | 560 |
| 9.86.3.10 operator=() [1/2]                                                                                 | 561 |
| 9.86.3.11 operator=() [2/2]                                                                                 | 561 |
| 9.86.3.12 resultsBegin()                                                                                    | 561 |
| 9.86.3.13 resultsEnd()                                                                                      | 562 |
| 9.86.3.14 setTimingEnabled()                                                                                | 562 |
| 9.87 LinkPred::PerfMeasure< PredResultsT > Class Template Reference                                         | 562 |
| 9.87.1 Detailed Description                                                                                 | 563 |
| 9.87.2 Member Typedef Documentation                                                                         | 563 |
| 9.87.2.1 ScoresItT                                                                                          | 563 |
| 9.87.3 Constructor & Destructor Documentation                                                               | 563 |
| 9.87.3.1 PerfMeasure() [1/4]                                                                                | 564 |
| 9.87.3.2 PerfMeasure() [2/4]                                                                                | 564 |
| 9.87.3.3 PerfMeasure() [3/4]                                                                                | 564 |
| 9.87.3.4 PerfMeasure() [4/4]                                                                                | 564 |
| 9.87.3.5 ~PerfMeasure()                                                                                     | 565 |
| 9.87.4 Member Function Documentation                                                                        | 565 |
| 9.87.4.1 eval() [1/2]                                                                                       | 565 |
| 9.87.4.2 eval() [2/2]                                                                                       | 565 |
| 9.87.4.3 getName()                                                                                          | 566 |

|                                                            |     |
|------------------------------------------------------------|-----|
| 9.87.4.4 operator=() [1/2]                                 | 566 |
| 9.87.4.5 operator=() [2/2]                                 | 566 |
| 9.87.4.6 requiresNeg()                                     | 567 |
| 9.87.4.7 requiresPos()                                     | 567 |
| 9.87.4.8 requiresShuffling()                               | 567 |
| 9.87.4.9 setName()                                         | 567 |
| 9.88 LinkPred::Simp::PerfRes Struct Reference              | 568 |
| 9.88.1 Detailed Description                                | 568 |
| 9.88.2 Member Data Documentation                           | 568 |
| 9.88.2.1 name                                              | 568 |
| 9.88.2.2 res                                               | 568 |
| 9.89 LinkPred::PR< PredResultsT > Class Template Reference | 569 |
| 9.89.1 Detailed Description                                | 570 |
| 9.89.2 Member Typedef Documentation                        | 571 |
| 9.89.2.1 ScoresItT                                         | 571 |
| 9.89.3 Member Enumeration Documentation                    | 571 |
| 9.89.3.1 InterpolMethod                                    | 571 |
| 9.89.4 Constructor & Destructor Documentation              | 571 |
| 9.89.4.1 PR() [1/4]                                        | 571 |
| 9.89.4.2 PR() [2/4]                                        | 571 |
| 9.89.4.3 PR() [3/4]                                        | 572 |
| 9.89.4.4 PR() [4/4]                                        | 572 |
| 9.89.4.5 ~PR()                                             | 572 |
| 9.89.5 Member Function Documentation                       | 572 |
| 9.89.5.1 eval() [1/2]                                      | 573 |
| 9.89.5.2 eval() [2/2]                                      | 573 |
| 9.89.5.3 getCurve() [1/2]                                  | 573 |
| 9.89.5.4 getCurve() [2/2]                                  | 574 |
| 9.89.5.5 getInterpolMethod()                               | 574 |
| 9.89.5.6 getPRAuc()                                        | 575 |
| 9.89.5.7 getPRAucDGI()                                     | 575 |
| 9.89.5.8 getPRAucLIN()                                     | 576 |
| 9.89.5.9 getPRCurve()                                      | 576 |
| 9.89.5.10 getThresholds()                                  | 577 |
| 9.89.5.11 operator=() [1/2]                                | 577 |
| 9.89.5.12 operator=() [2/2]                                | 577 |
| 9.89.5.13 setInterpolMethod()                              | 578 |
| 9.90 LinkPred::Simp::Predictor Class Reference             | 578 |
| 9.90.1 Detailed Description                                | 580 |
| 9.90.2 Constructor & Destructor Documentation              | 580 |
| 9.90.2.1 Predictor() [1/2]                                 | 580 |
| 9.90.2.2 Predictor() [2/2]                                 | 581 |

|                                      |     |
|--------------------------------------|-----|
| 9.90.2.3 $\sim$ Predictor()          | 581 |
| 9.90.3 Member Function Documentation | 581 |
| 9.90.3.1 getID()                     | 581 |
| 9.90.3.2 getLabel()                  | 581 |
| 9.90.3.3 getNbNodes()                | 582 |
| 9.90.3.4 isEdgeByID()                | 582 |
| 9.90.3.5 isEdgeByLabel()             | 582 |
| 9.90.3.6 loadnet()                   | 583 |
| 9.90.3.7 predADA()                   | 583 |
| 9.90.3.8 predAllADA()                | 583 |
| 9.90.3.9 predAllADAByID()            | 584 |
| 9.90.3.10 predAllCNE()               | 584 |
| 9.90.3.11 predAllCNEByID()           | 584 |
| 9.90.3.12 predAllCRA()               | 584 |
| 9.90.3.13 predAllCRAByID()           | 585 |
| 9.90.3.14 predAllECL()               | 585 |
| 9.90.3.15 predAllECLByID()           | 585 |
| 9.90.3.16 predAllESM()               | 586 |
| 9.90.3.17 predAllESMByID()           | 587 |
| 9.90.3.18 predAllFBM()               | 587 |
| 9.90.3.19 predAllFBMByID()           | 587 |
| 9.90.3.20 predAllHDI()               | 589 |
| 9.90.3.21 predAllHDIByID()           | 589 |
| 9.90.3.22 predAllHPI()               | 589 |
| 9.90.3.23 predAllHPIByID()           | 590 |
| 9.90.3.24 predAllHRG()               | 590 |
| 9.90.3.25 predAllHRGByID()           | 590 |
| 9.90.3.26 predAllHYP()               | 591 |
| 9.90.3.27 predAllHYPByID()           | 591 |
| 9.90.3.28 predAllJID()               | 592 |
| 9.90.3.29 predAllJIDByID()           | 592 |
| 9.90.3.30 predAllKAB()               | 592 |
| 9.90.3.31 predAllKABByID()           | 593 |
| 9.90.3.32 predAllLCP()               | 593 |
| 9.90.3.33 predAllLCPByID()           | 593 |
| 9.90.3.34 predAllLHN()               | 594 |
| 9.90.3.35 predAllLHNByID()           | 594 |
| 9.90.3.36 predAllPAT()               | 594 |
| 9.90.3.37 predAllPATByID()           | 594 |
| 9.90.3.38 predAllRAL()               | 595 |
| 9.90.3.39 predAllRALByID()           | 595 |
| 9.90.3.40 predAllRND()               | 595 |

|                            |     |
|----------------------------|-----|
| 9.90.3.41 predAllRNDByID() | 595 |
| 9.90.3.42 predAllSAI()     | 596 |
| 9.90.3.43 predAllSAIByID() | 596 |
| 9.90.3.44 predAllSBM()     | 596 |
| 9.90.3.45 predAllSBMByID() | 597 |
| 9.90.3.46 predAllSHP()     | 597 |
| 9.90.3.47 predAllSHPByID() | 597 |
| 9.90.3.48 predAllSOI()     | 598 |
| 9.90.3.49 predAllSOIByID() | 598 |
| 9.90.3.50 predCNE()        | 598 |
| 9.90.3.51 predCRA()        | 599 |
| 9.90.3.52 predECL()        | 599 |
| 9.90.3.53 predESM()        | 599 |
| 9.90.3.54 predFBM()        | 600 |
| 9.90.3.55 predHDI()        | 600 |
| 9.90.3.56 predHPI()        | 601 |
| 9.90.3.57 predHRG()        | 601 |
| 9.90.3.58 predHYP()        | 601 |
| 9.90.3.59 predJID()        | 602 |
| 9.90.3.60 predKAB()        | 602 |
| 9.90.3.61 predLCP()        | 602 |
| 9.90.3.62 predLHN()        | 603 |
| 9.90.3.63 predPAT()        | 603 |
| 9.90.3.64 predRAL()        | 603 |
| 9.90.3.65 predRND()        | 604 |
| 9.90.3.66 predSAI()        | 604 |
| 9.90.3.67 predSBM()        | 604 |
| 9.90.3.68 predSHP()        | 604 |
| 9.90.3.69 predSOI()        | 605 |
| 9.90.3.70 predTopADA()     | 605 |
| 9.90.3.71 predTopCNE()     | 605 |
| 9.90.3.72 predTopCRA()     | 606 |
| 9.90.3.73 predTopECL()     | 606 |
| 9.90.3.74 predTopESM()     | 607 |
| 9.90.3.75 predTopFBM()     | 607 |
| 9.90.3.76 predTopHDI()     | 608 |
| 9.90.3.77 predTopHPI()     | 608 |
| 9.90.3.78 predTopHRG()     | 609 |
| 9.90.3.79 predTopHYP()     | 609 |
| 9.90.3.80 predTopJID()     | 610 |
| 9.90.3.81 predTopKAB()     | 610 |
| 9.90.3.82 predTopLCP()     | 610 |



|                                                                                                 |     |
|-------------------------------------------------------------------------------------------------|-----|
| 9.90.3.83 predTopLHN()                                                                          | 611 |
| 9.90.3.84 predTopPAT()                                                                          | 611 |
| 9.90.3.85 predTopRAL()                                                                          | 611 |
| 9.90.3.86 predTopRND()                                                                          | 612 |
| 9.90.3.87 predTopSAI()                                                                          | 612 |
| 9.90.3.88 predTopSBM()                                                                          | 613 |
| 9.90.3.89 predTopSHP()                                                                          | 613 |
| 9.90.3.90 predTopSOI()                                                                          | 613 |
| 9.91 LinkPred::PredResults< TestDataT, LPredictorT, ScoresContainerT > Class Template Reference | 614 |
| 9.91.1 Detailed Description                                                                     | 615 |
| 9.91.2 Member Typedef Documentation                                                             | 615 |
| 9.91.2.1 ScoresItT                                                                              | 615 |
| 9.91.3 Constructor & Destructor Documentation                                                   | 615 |
| 9.91.3.1 PredResults() [1/3]                                                                    | 616 |
| 9.91.3.2 PredResults() [2/3]                                                                    | 616 |
| 9.91.3.3 PredResults() [3/3]                                                                    | 616 |
| 9.91.3.4 ~PredResults()                                                                         | 616 |
| 9.91.4 Member Function Documentation                                                            | 617 |
| 9.91.4.1 compNegScores()                                                                        | 617 |
| 9.91.4.2 compPosScores()                                                                        | 617 |
| 9.91.4.3 compTopScores()                                                                        | 617 |
| 9.91.4.4 getNbTop()                                                                             | 617 |
| 9.91.4.5 getNegSortOrder()                                                                      | 618 |
| 9.91.4.6 getPosSortOrder()                                                                      | 618 |
| 9.91.4.7 getPredictor()                                                                         | 618 |
| 9.91.4.8 getTestData()                                                                          | 619 |
| 9.91.4.9 isNegComputed()                                                                        | 619 |
| 9.91.4.10 isPosComputed()                                                                       | 619 |
| 9.91.4.11 isTopComputed()                                                                       | 619 |
| 9.91.4.12 negBegin()                                                                            | 620 |
| 9.91.4.13 negEnd()                                                                              | 620 |
| 9.91.4.14 negStrmBegin()                                                                        | 620 |
| 9.91.4.15 negStrmEnd()                                                                          | 620 |
| 9.91.4.16 operator=() [1/2]                                                                     | 621 |
| 9.91.4.17 operator=() [2/2]                                                                     | 622 |
| 9.91.4.18 posBegin()                                                                            | 622 |
| 9.91.4.19 posEnd()                                                                              | 622 |
| 9.91.4.20 posStrmBegin()                                                                        | 623 |
| 9.91.4.21 posStrmEnd()                                                                          | 623 |
| 9.91.4.22 sortNeg()                                                                             | 623 |
| 9.91.4.23 sortPos()                                                                             | 623 |
| 9.91.4.24 topBegin()                                                                            | 625 |

|                                                                                        |     |
|----------------------------------------------------------------------------------------|-----|
| 9.91.4.25 topEdgesBegin()                                                              | 625 |
| 9.91.4.26 topEdgesEnd()                                                                | 625 |
| 9.91.4.27 topEnd()                                                                     | 626 |
| 9.92 LinkPred::Simp::Evaluator::Factory::PSTParams Struct Reference                    | 626 |
| 9.92.1 Detailed Description                                                            | 626 |
| 9.92.2 Member Data Documentation                                                       | 626 |
| 9.92.2.1 fileName                                                                      | 626 |
| 9.93 LinkPred::RandomGen Class Reference                                               | 627 |
| 9.93.1 Detailed Description                                                            | 627 |
| 9.93.2 Constructor & Destructor Documentation                                          | 627 |
| 9.93.2.1 RandomGen() [1/4]                                                             | 627 |
| 9.93.2.2 RandomGen() [2/4]                                                             | 627 |
| 9.93.2.3 RandomGen() [3/4]                                                             | 628 |
| 9.93.2.4 RandomGen() [4/4]                                                             | 628 |
| 9.93.2.5 ~RandomGen()                                                                  | 628 |
| 9.93.3 Member Function Documentation                                                   | 628 |
| 9.93.3.1 getBool()                                                                     | 628 |
| 9.93.3.2 getDouble()                                                                   | 629 |
| 9.93.3.3 getGeo()                                                                      | 629 |
| 9.93.3.4 getInt()                                                                      | 629 |
| 9.93.3.5 getPL()                                                                       | 630 |
| 9.93.3.6 getSeed()                                                                     | 630 |
| 9.93.3.7 getSInt()                                                                     | 630 |
| 9.93.3.8 getUInt()                                                                     | 631 |
| 9.93.3.9 operator=() [1/2]                                                             | 631 |
| 9.93.3.10 operator=() [2/2]                                                            | 631 |
| 9.94 LinkPred::RndClassifier< InRndIt, OutRndIt, ScoreRndIt > Class Template Reference | 632 |
| 9.94.1 Detailed Description                                                            | 632 |
| 9.94.2 Constructor & Destructor Documentation                                          | 633 |
| 9.94.2.1 RndClassifier() [1/3]                                                         | 633 |
| 9.94.2.2 RndClassifier() [2/3]                                                         | 633 |
| 9.94.2.3 RndClassifier() [3/3]                                                         | 633 |
| 9.94.2.4 ~RndClassifier()                                                              | 635 |
| 9.94.3 Member Function Documentation                                                   | 635 |
| 9.94.3.1 learn()                                                                       | 635 |
| 9.94.3.2 operator=() [1/2]                                                             | 635 |
| 9.94.3.3 operator=() [2/2]                                                             | 636 |
| 9.94.3.4 predict()                                                                     | 636 |
| 9.95 LinkPred::UNetwork< LabelT, NodeIDT, EdgeT >::RndEdgeIt Class Reference           | 636 |
| 9.95.1 Detailed Description                                                            | 638 |
| 9.95.2 Member Typedef Documentation                                                    | 638 |
| 9.95.2.1 pointer                                                                       | 638 |

|                                                                              |     |
|------------------------------------------------------------------------------|-----|
| 9.95.2.2 reference                                                           | 638 |
| 9.95.3 Constructor & Destructor Documentation                                | 638 |
| 9.95.3.1 RndEdgelt() [1/2]                                                   | 638 |
| 9.95.3.2 RndEdgelt() [2/2]                                                   | 639 |
| 9.95.4 Member Function Documentation                                         | 639 |
| 9.95.4.1 operator!=(())                                                      | 639 |
| 9.95.4.2 operator*()                                                         | 639 |
| 9.95.4.3 operator++()                                                        | 640 |
| 9.95.4.4 operator++()                                                        | 640 |
| 9.95.4.5 operator->()                                                        | 640 |
| 9.95.4.6 operator=()                                                         | 640 |
| 9.95.4.7 operator=()                                                         | 641 |
| 9.95.4.8 operator==(())                                                      | 641 |
| 9.96 LinkPred::DNetwork< LabelT, NodeIDT, EdgeT >::RndEdgelt Class Reference | 641 |
| 9.96.1 Detailed Description                                                  | 643 |
| 9.96.2 Member Typedef Documentation                                          | 643 |
| 9.96.2.1 pointer                                                             | 643 |
| 9.96.2.2 reference                                                           | 643 |
| 9.96.3 Constructor & Destructor Documentation                                | 643 |
| 9.96.3.1 RndEdgelt() [1/2]                                                   | 643 |
| 9.96.3.2 RndEdgelt() [2/2]                                                   | 644 |
| 9.96.4 Member Function Documentation                                         | 644 |
| 9.96.4.1 operator!=(())                                                      | 644 |
| 9.96.4.2 operator*()                                                         | 644 |
| 9.96.4.3 operator++()                                                        | 645 |
| 9.96.4.4 operator++()                                                        | 645 |
| 9.96.4.5 operator->()                                                        | 645 |
| 9.96.4.6 operator=()                                                         | 645 |
| 9.96.4.7 operator=()                                                         | 646 |
| 9.96.4.8 operator==(())                                                      | 646 |
| 9.97 LinkPred::DNetwork< LabelT, NodeIDT, EdgeT >::RndNodeIt Class Reference | 646 |
| 9.97.1 Detailed Description                                                  | 648 |
| 9.97.2 Member Typedef Documentation                                          | 648 |
| 9.97.2.1 pointer                                                             | 648 |
| 9.97.2.2 reference                                                           | 648 |
| 9.97.3 Constructor & Destructor Documentation                                | 648 |
| 9.97.3.1 RndNodeIt() [1/2]                                                   | 648 |
| 9.97.3.2 RndNodeIt() [2/2]                                                   | 649 |
| 9.97.4 Member Function Documentation                                         | 649 |
| 9.97.4.1 operator!=(())                                                      | 649 |
| 9.97.4.2 operator*()                                                         | 649 |
| 9.97.4.3 operator++()                                                        | 650 |

|                                                                                  |     |
|----------------------------------------------------------------------------------|-----|
| 9.97.4.4 operator++() [2/2]                                                      | 650 |
| 9.97.4.5 operator->()                                                            | 650 |
| 9.97.4.6 operator=() [1/2]                                                       | 650 |
| 9.97.4.7 operator=() [2/2]                                                       | 651 |
| 9.97.4.8 operator==()                                                            | 651 |
| 9.98 LinkPred::UNetwork< LabelT, NodeIDT, EdgeT >::RndNodeIt Class Reference     | 651 |
| 9.98.1 Detailed Description                                                      | 653 |
| 9.98.2 Member Typedef Documentation                                              | 653 |
| 9.98.2.1 pointer                                                                 | 653 |
| 9.98.2.2 reference                                                               | 653 |
| 9.98.3 Constructor & Destructor Documentation                                    | 653 |
| 9.98.3.1 RndNodeIt() [1/2]                                                       | 653 |
| 9.98.3.2 RndNodeIt() [2/2]                                                       | 654 |
| 9.98.4 Member Function Documentation                                             | 654 |
| 9.98.4.1 operator!=(())                                                          | 654 |
| 9.98.4.2 operator*()                                                             | 654 |
| 9.98.4.3 operator++() [1/2]                                                      | 655 |
| 9.98.4.4 operator++() [2/2]                                                      | 655 |
| 9.98.4.5 operator->()                                                            | 655 |
| 9.98.4.6 operator=() [1/2]                                                       | 655 |
| 9.98.4.7 operator=() [2/2]                                                       | 656 |
| 9.98.4.8 operator==(())                                                          | 656 |
| 9.99 LinkPred::UNetwork< LabelT, NodeIDT, EdgeT >::RndNonEdgeIt Class Reference  | 656 |
| 9.99.1 Detailed Description                                                      | 658 |
| 9.99.2 Member Typedef Documentation                                              | 658 |
| 9.99.2.1 pointer                                                                 | 658 |
| 9.99.2.2 reference                                                               | 658 |
| 9.99.3 Constructor & Destructor Documentation                                    | 658 |
| 9.99.3.1 RndNonEdgeIt() [1/2]                                                    | 658 |
| 9.99.3.2 RndNonEdgeIt() [2/2]                                                    | 659 |
| 9.99.4 Member Function Documentation                                             | 659 |
| 9.99.4.1 operator!=(())                                                          | 659 |
| 9.99.4.2 operator*()                                                             | 659 |
| 9.99.4.3 operator++() [1/2]                                                      | 660 |
| 9.99.4.4 operator++() [2/2]                                                      | 660 |
| 9.99.4.5 operator->()                                                            | 660 |
| 9.99.4.6 operator=() [1/2]                                                       | 660 |
| 9.99.4.7 operator=() [2/2]                                                       | 661 |
| 9.99.4.8 operator==(())                                                          | 661 |
| 9.100 LinkPred::DNetwork< LabelT, NodeIDT, EdgeT >::RndNonEdgeIt Class Reference | 661 |
| 9.100.1 Detailed Description                                                     | 663 |
| 9.100.2 Member Typedef Documentation                                             | 663 |

|                                                                      |     |
|----------------------------------------------------------------------|-----|
| 9.100.2.1 pointer                                                    | 663 |
| 9.100.2.2 reference                                                  | 663 |
| 9.100.3 Constructor & Destructor Documentation                       | 663 |
| 9.100.3.1 RndNonEdgeIt() [1/2]                                       | 663 |
| 9.100.3.2 RndNonEdgeIt() [2/2]                                       | 664 |
| 9.100.4 Member Function Documentation                                | 664 |
| 9.100.4.1 operator!=()                                               | 664 |
| 9.100.4.2 operator*()                                                | 664 |
| 9.100.4.3 operator++() [1/2]                                         | 665 |
| 9.100.4.4 operator++() [2/2]                                         | 665 |
| 9.100.4.5 operator->()                                               | 665 |
| 9.100.4.6 operator=() [1/2]                                          | 665 |
| 9.100.4.7 operator=() [2/2]                                          | 666 |
| 9.100.4.8 operator==(())                                             | 666 |
| 9.101 LinkPred::Simp::Evaluator::Factory::RNDParams Struct Reference | 666 |
| 9.101.1 Detailed Description                                         | 667 |
| 9.101.2 Member Data Documentation                                    | 667 |
| 9.101.2.1 seed                                                       | 667 |
| 9.102 LinkPred::ROC< PredResultsT > Class Template Reference         | 667 |
| 9.102.1 Detailed Description                                         | 669 |
| 9.102.2 Member Typedef Documentation                                 | 669 |
| 9.102.2.1 ScoresItT                                                  | 669 |
| 9.102.3 Constructor & Destructor Documentation                       | 669 |
| 9.102.3.1 ROC() [1/4]                                                | 669 |
| 9.102.3.2 ROC() [2/4]                                                | 669 |
| 9.102.3.3 ROC() [3/4]                                                | 670 |
| 9.102.3.4 ROC() [4/4]                                                | 670 |
| 9.102.3.5 ~ROC()                                                     | 670 |
| 9.102.4 Member Function Documentation                                | 670 |
| 9.102.4.1 eval() [1/2]                                               | 671 |
| 9.102.4.2 eval() [2/2]                                               | 671 |
| 9.102.4.3 evalNoStream()                                             | 671 |
| 9.102.4.4 evalStream()                                               | 672 |
| 9.102.4.5 getCurve() [1/2]                                           | 672 |
| 9.102.4.6 getCurve() [2/2]                                           | 673 |
| 9.102.4.7 getROCAuc()                                                | 673 |
| 9.102.4.8 getROCAucStrm()                                            | 673 |
| 9.102.4.9 getROCCurve()                                              | 674 |
| 9.102.4.10 getThresholds()                                           | 674 |
| 9.102.4.11 isStrmEnabled()                                           | 675 |
| 9.102.4.12 isStrmNeg()                                               | 675 |
| 9.102.4.13 operator=() [1/2]                                         | 675 |

|                                                                                                        |     |
|--------------------------------------------------------------------------------------------------------|-----|
| 9.102.4.14 operator=() [2/2]                                                                           | 676 |
| 9.102.4.15 setStrmEnabled()                                                                            | 676 |
| 9.102.4.16 setStrmNeg()                                                                                | 676 |
| 9.103 LinkPred::Simp::Evaluator::Factory::SBMParams Struct Reference                                   | 677 |
| 9.103.1 Detailed Description                                                                           | 677 |
| 9.103.2 Member Data Documentation                                                                      | 677 |
| 9.103.2.1 maxIter                                                                                      | 677 |
| 9.103.2.2 seed                                                                                         | 677 |
| 9.104 LinkPred::PredResults< TestDataT, LPredictorT, ScoresContainerT >::ScoreIterator Class Reference | 678 |
| 9.104.1 Detailed Description                                                                           | 679 |
| 9.104.2 Member Typedef Documentation                                                                   | 679 |
| 9.104.2.1 difference_type                                                                              | 679 |
| 9.104.2.2 pointer                                                                                      | 680 |
| 9.104.2.3 reference                                                                                    | 680 |
| 9.104.3 Constructor & Destructor Documentation                                                         | 680 |
| 9.104.3.1 ScoreIterator() [1/3]                                                                        | 680 |
| 9.104.3.2 ScoreIterator() [2/3]                                                                        | 680 |
| 9.104.3.3 ScoreIterator() [3/3]                                                                        | 682 |
| 9.104.4 Member Function Documentation                                                                  | 682 |
| 9.104.4.1 operator!=(())                                                                               | 682 |
| 9.104.4.2 operator*()                                                                                  | 682 |
| 9.104.4.3 operator+()                                                                                  | 683 |
| 9.104.4.4 operator++() [1/2]                                                                           | 683 |
| 9.104.4.5 operator++() [2/2]                                                                           | 683 |
| 9.104.4.6 operator+=(())                                                                               | 684 |
| 9.104.4.7 operator-() [1/2]                                                                            | 684 |
| 9.104.4.8 operator-() [2/2]                                                                            | 684 |
| 9.104.4.9 operator--() [1/2]                                                                           | 685 |
| 9.104.4.10 operator--() [2/2]                                                                          | 685 |
| 9.104.4.11 operator-=()                                                                                | 685 |
| 9.104.4.12 operator->()                                                                                | 686 |
| 9.104.4.13 operator<()                                                                                 | 686 |
| 9.104.4.14 operator<=()                                                                                | 686 |
| 9.104.4.15 operator=() [1/2]                                                                           | 687 |
| 9.104.4.16 operator=() [2/2]                                                                           | 687 |
| 9.104.4.17 operator==(())                                                                              | 687 |
| 9.104.4.18 operator>()                                                                                 | 688 |
| 9.104.4.19 operator>=()                                                                                | 688 |
| 9.104.5 Friends And Related Function Documentation                                                     | 688 |
| 9.104.5.1 PredResults                                                                                  | 689 |
| 9.105 LinkPred::Simp::Evaluator::Factory::SHPPParams Struct Reference                                  | 689 |
| 9.105.1 Detailed Description                                                                           | 689 |

|                                                                         |     |
|-------------------------------------------------------------------------|-----|
| 9.105.2 Member Data Documentation                                       | 689 |
| 9.105.2.1 seed                                                          | 689 |
| 9.106 LinkPred::SimMeasure Class Reference                              | 690 |
| 9.106.1 Detailed Description                                            | 690 |
| 9.106.2 Constructor & Destructor Documentation                          | 690 |
| 9.106.2.1 SimMeasure() [1/3]                                            | 691 |
| 9.106.2.2 SimMeasure() [2/3]                                            | 691 |
| 9.106.2.3 SimMeasure() [3/3]                                            | 691 |
| 9.106.2.4 ~SimMeasure()                                                 | 691 |
| 9.106.3 Member Function Documentation                                   | 691 |
| 9.106.3.1 getName()                                                     | 691 |
| 9.106.3.2 operator=() [1/2]                                             | 692 |
| 9.106.3.3 operator=() [2/2]                                             | 692 |
| 9.106.3.4 setName()                                                     | 692 |
| 9.106.3.5 sim()                                                         | 692 |
| 9.107 LinkPred::TestData< Network, EdgeContT > Class Template Reference | 693 |
| 9.107.1 Detailed Description                                            | 694 |
| 9.107.2 Member Typedef Documentation                                    | 694 |
| 9.107.2.1 Edge                                                          | 695 |
| 9.107.2.2 Edgelt                                                        | 695 |
| 9.107.2.3 NetworkCSP                                                    | 695 |
| 9.107.2.4 NetworkSP                                                     | 695 |
| 9.107.2.5 NonEdgelt                                                     | 695 |
| 9.107.3 Member Enumeration Documentation                                | 695 |
| 9.107.3.1 IteratorType                                                  | 695 |
| 9.107.4 Constructor & Destructor Documentation                          | 696 |
| 9.107.4.1 TestData() [1/4]                                              | 696 |
| 9.107.4.2 TestData() [2/4]                                              | 696 |
| 9.107.4.3 TestData() [3/4]                                              | 697 |
| 9.107.4.4 TestData() [4/4]                                              | 697 |
| 9.107.4.5 ~TestData()                                                   | 697 |
| 9.107.5 Member Function Documentation                                   | 698 |
| 9.107.5.1 genNeg()                                                      | 698 |
| 9.107.5.2 genPos()                                                      | 698 |
| 9.107.5.3 getEg()                                                       | 698 |
| 9.107.5.4 getNbNeg()                                                    | 698 |
| 9.107.5.5 getNbPos()                                                    | 699 |
| 9.107.5.6 getNegClass()                                                 | 699 |
| 9.107.5.7 getObsNet()                                                   | 699 |
| 9.107.5.8 getPosClass()                                                 | 699 |
| 9.107.5.9 getRefNet()                                                   | 700 |
| 9.107.5.10 getRemLinksMap()                                             | 700 |

|                                                                            |     |
|----------------------------------------------------------------------------|-----|
| 9.107.5.11 isLocked()                                                      | 700 |
| 9.107.5.12 isTnGenerated()                                                 | 700 |
| 9.107.5.13 isTpGenerated()                                                 | 701 |
| 9.107.5.14 lock()                                                          | 701 |
| 9.107.5.15 negBegin()                                                      | 701 |
| 9.107.5.16 negEnd()                                                        | 701 |
| 9.107.5.17 negStrmBegin()                                                  | 702 |
| 9.107.5.18 negStrmEnd()                                                    | 702 |
| 9.107.5.19 operator=() [1/2]                                               | 702 |
| 9.107.5.20 operator=() [2/2]                                               | 702 |
| 9.107.5.21 posBegin()                                                      | 703 |
| 9.107.5.22 posEnd()                                                        | 703 |
| 9.107.5.23 posStrmBegin()                                                  | 703 |
| 9.107.5.24 posStrmEnd()                                                    | 704 |
| 9.108 LinkPred::TestEdgeGen< Network, EdgeContT > Class Template Reference | 704 |
| 9.108.1 Detailed Description                                               | 704 |
| 9.108.2 Constructor & Destructor Documentation                             | 705 |
| 9.108.2.1 TestEdgeGen() [1/3]                                              | 705 |
| 9.108.2.2 TestEdgeGen() [2/3]                                              | 705 |
| 9.108.2.3 TestEdgeGen() [3/3]                                              | 706 |
| 9.108.2.4 ~TestEdgeGen()                                                   | 706 |
| 9.108.3 Member Function Documentation                                      | 706 |
| 9.108.3.1 generateTN()                                                     | 706 |
| 9.108.3.2 generateTP()                                                     | 707 |
| 9.108.3.3 operator=() [1/2]                                                | 707 |
| 9.108.3.4 operator=() [2/2]                                                | 707 |
| 9.108.3.5 tnBegin()                                                        | 708 |
| 9.108.3.6 tnEnd()                                                          | 708 |
| 9.108.3.7 tpBegin()                                                        | 708 |
| 9.108.3.8 tpEnd()                                                          | 709 |
| 9.109 LinkPred::TestData< Network, EdgeContT >::TestEdgelt Class Reference | 709 |
| 9.109.1 Detailed Description                                               | 711 |
| 9.109.2 Member Typedef Documentation                                       | 711 |
| 9.109.2.1 difference_type                                                  | 711 |
| 9.109.2.2 pointer                                                          | 711 |
| 9.109.2.3 reference                                                        | 711 |
| 9.109.3 Constructor & Destructor Documentation                             | 711 |
| 9.109.3.1 TestEdgelt() [1/3]                                               | 711 |
| 9.109.3.2 TestEdgelt() [2/3]                                               | 712 |
| 9.109.3.3 TestEdgelt() [3/3]                                               | 712 |
| 9.109.4 Member Function Documentation                                      | 712 |
| 9.109.4.1 operator"!=(                                                     | 712 |



|                                                                             |     |
|-----------------------------------------------------------------------------|-----|
| 9.109.4.2 operator*()                                                       | 713 |
| 9.109.4.3 operator+()                                                       | 713 |
| 9.109.4.4 operator++() [1/2]                                                | 713 |
| 9.109.4.5 operator++() [2/2]                                                | 714 |
| 9.109.4.6 operator+=()                                                      | 714 |
| 9.109.4.7 operator-() [1/2]                                                 | 714 |
| 9.109.4.8 operator-() [2/2]                                                 | 715 |
| 9.109.4.9 operator--() [1/2]                                                | 715 |
| 9.109.4.10 operator--() [2/2]                                               | 715 |
| 9.109.4.11 operator-=()                                                     | 716 |
| 9.109.4.12 operator->()                                                     | 716 |
| 9.109.4.13 operator<()                                                      | 716 |
| 9.109.4.14 operator<=()                                                     | 717 |
| 9.109.4.15 operator=() [1/2]                                                | 717 |
| 9.109.4.16 operator=() [2/2]                                                | 717 |
| 9.109.4.17 operator==()                                                     | 718 |
| 9.109.4.18 operator>()                                                      | 718 |
| 9.109.4.19 operator>=()                                                     | 718 |
| 9.109.5 Friends And Related Function Documentation                          | 719 |
| 9.109.5.1 TestData                                                          | 719 |
| 9.110 LinkPred::TestEdgeGen< Network, EdgeContT >::TNEdgelt Class Reference | 719 |
| 9.110.1 Detailed Description                                                | 721 |
| 9.110.2 Member Typedef Documentation                                        | 721 |
| 9.110.2.1 difference_type                                                   | 721 |
| 9.110.2.2 pointer                                                           | 721 |
| 9.110.2.3 reference                                                         | 721 |
| 9.110.3 Constructor & Destructor Documentation                              | 721 |
| 9.110.3.1 TNEdgelt() [1/2]                                                  | 721 |
| 9.110.3.2 TNEdgelt() [2/2]                                                  | 722 |
| 9.110.4 Member Function Documentation                                       | 722 |
| 9.110.4.1 operator"!=(                                                      | 722 |
| 9.110.4.2 operator*()                                                       | 722 |
| 9.110.4.3 operator+()                                                       | 723 |
| 9.110.4.4 operator++() [1/2]                                                | 723 |
| 9.110.4.5 operator++() [2/2]                                                | 723 |
| 9.110.4.6 operator+=()                                                      | 724 |
| 9.110.4.7 operator-() [1/2]                                                 | 724 |
| 9.110.4.8 operator-() [2/2]                                                 | 724 |
| 9.110.4.9 operator--() [1/2]                                                | 725 |
| 9.110.4.10 operator--() [2/2]                                               | 725 |
| 9.110.4.11 operator-=()                                                     | 725 |
| 9.110.4.12 operator->()                                                     | 726 |

|                                                                            |     |
|----------------------------------------------------------------------------|-----|
| 9.110.4.13 operator<()                                                     | 726 |
| 9.110.4.14 operator<=()                                                    | 726 |
| 9.110.4.15 operator=() [1/2]                                               | 727 |
| 9.110.4.16 operator=() [2/2]                                               | 727 |
| 9.110.4.17 operator==(())                                                  | 727 |
| 9.110.4.18 operator>()                                                     | 728 |
| 9.110.4.19 operator>=()                                                    | 728 |
| 9.110.5 Friends And Related Function Documentation                         | 728 |
| 9.110.5.1 TestEdgeGen                                                      | 728 |
| 9.111 LinkPred::TestEdgeGen< Network, EdgeContT >::TPEdget Class Reference | 729 |
| 9.111.1 Detailed Description                                               | 730 |
| 9.111.2 Member Typedef Documentation                                       | 730 |
| 9.111.2.1 difference_type                                                  | 730 |
| 9.111.2.2 pointer                                                          | 731 |
| 9.111.2.3 reference                                                        | 731 |
| 9.111.3 Constructor & Destructor Documentation                             | 731 |
| 9.111.3.1 TPEdget() [1/2]                                                  | 731 |
| 9.111.3.2 TPEdget() [2/2]                                                  | 731 |
| 9.111.4 Member Function Documentation                                      | 732 |
| 9.111.4.1 operator"!=(())                                                  | 732 |
| 9.111.4.2 operator*()                                                      | 732 |
| 9.111.4.3 operator+()                                                      | 732 |
| 9.111.4.4 operator++() [1/2]                                               | 733 |
| 9.111.4.5 operator++() [2/2]                                               | 733 |
| 9.111.4.6 operator+=(())                                                   | 733 |
| 9.111.4.7 operator-() [1/2]                                                | 734 |
| 9.111.4.8 operator-() [2/2]                                                | 734 |
| 9.111.4.9 operator--() [1/2]                                               | 734 |
| 9.111.4.10 operator--() [2/2]                                              | 735 |
| 9.111.4.11 operator-=()                                                    | 735 |
| 9.111.4.12 operator->()                                                    | 735 |
| 9.111.4.13 operator<()                                                     | 736 |
| 9.111.4.14 operator<=()                                                    | 736 |
| 9.111.4.15 operator=() [1/2]                                               | 736 |
| 9.111.4.16 operator=() [2/2]                                               | 737 |
| 9.111.4.17 operator==(())                                                  | 737 |
| 9.111.4.18 operator>()                                                     | 737 |
| 9.111.4.19 operator>=()                                                    | 738 |
| 9.111.5 Friends And Related Function Documentation                         | 738 |
| 9.111.5.1 TestEdgeGen                                                      | 738 |
| 9.112 LinkPred::TPR< PredResultsT > Class Template Reference               | 738 |
| 9.112.1 Detailed Description                                               | 739 |

|                                                                                              |     |
|----------------------------------------------------------------------------------------------|-----|
| 9.112.2 Member Typedef Documentation                                                         | 740 |
| 9.112.2.1 ScoresItT                                                                          | 740 |
| 9.112.3 Constructor & Destructor Documentation                                               | 740 |
| 9.112.3.1 TPR() [1/4]                                                                        | 740 |
| 9.112.3.2 TPR() [2/4]                                                                        | 740 |
| 9.112.3.3 TPR() [3/4]                                                                        | 741 |
| 9.112.3.4 TPR() [4/4]                                                                        | 741 |
| 9.112.3.5 ~TPR()                                                                             | 741 |
| 9.112.4 Member Function Documentation                                                        | 741 |
| 9.112.4.1 eval() [1/2]                                                                       | 742 |
| 9.112.4.2 eval() [2/2]                                                                       | 742 |
| 9.112.4.3 evalUsingPredict()                                                                 | 742 |
| 9.112.4.4 evalUsingTop()                                                                     | 743 |
| 9.112.4.5 getTPR()                                                                           | 743 |
| 9.112.4.6 isUseTopMethod()                                                                   | 743 |
| 9.112.4.7 operator=() [1/2]                                                                  | 744 |
| 9.112.4.8 operator=() [2/2]                                                                  | 744 |
| 9.112.4.9 requiresNeg()                                                                      | 744 |
| 9.112.4.10 requiresShuffling()                                                               | 745 |
| 9.112.4.11 setUseTopMethod()                                                                 | 745 |
| 9.113 LinkPred::UADAPredictor< Network, EdgeRndIt, ScoreRndIt, EdgeRndOutIt > Class Template |     |
| Reference                                                                                    | 745 |
| 9.113.1 Detailed Description                                                                 | 746 |
| 9.113.2 Constructor & Destructor Documentation                                               | 747 |
| 9.113.2.1 UADAPredictor() [1/3]                                                              | 747 |
| 9.113.2.2 UADAPredictor() [2/3]                                                              | 747 |
| 9.113.2.3 UADAPredictor() [3/3]                                                              | 747 |
| 9.113.2.4 ~UADAPredictor()                                                                   | 748 |
| 9.113.3 Member Function Documentation                                                        | 748 |
| 9.113.3.1 init()                                                                             | 748 |
| 9.113.3.2 learn()                                                                            | 748 |
| 9.113.3.3 operator=() [1/2]                                                                  | 748 |
| 9.113.3.4 operator=() [2/2]                                                                  | 749 |
| 9.113.3.5 predict()                                                                          | 749 |
| 9.113.3.6 score()                                                                            | 749 |
| 9.113.3.7 top()                                                                              | 750 |
| 9.114 LinkPred::UCNEPredictor< Network, EdgeRndIt, ScoreRndIt, EdgeRndOutIt > Class Template |     |
| Reference                                                                                    | 751 |
| 9.114.1 Detailed Description                                                                 | 752 |
| 9.114.2 Constructor & Destructor Documentation                                               | 752 |
| 9.114.2.1 UCNEPredictor() [1/3]                                                              | 752 |
| 9.114.2.2 UCNEPredictor() [2/3]                                                              | 752 |
| 9.114.2.3 UCNEPredictor() [3/3]                                                              | 753 |

|                                                                                                        |     |
|--------------------------------------------------------------------------------------------------------|-----|
| 9.114.2.4 ~UCNEPredictor()                                                                             | 753 |
| 9.114.3 Member Function Documentation                                                                  | 753 |
| 9.114.3.1 init()                                                                                       | 753 |
| 9.114.3.2 learn()                                                                                      | 754 |
| 9.114.3.3 operator=() [1/2]                                                                            | 754 |
| 9.114.3.4 operator=() [2/2]                                                                            | 754 |
| 9.114.3.5 predict()                                                                                    | 755 |
| 9.114.3.6 score()                                                                                      | 755 |
| 9.114.3.7 top()                                                                                        | 755 |
| 9.115 LinkPred::UCRAPredictor< Network, EdgeRndIt, ScoreRndIt, EdgeRndOutIt > Class Template Reference | 756 |
| 9.115.1 Detailed Description                                                                           | 757 |
| 9.115.2 Constructor & Destructor Documentation                                                         | 758 |
| 9.115.2.1 UCRAPredictor() [1/3]                                                                        | 758 |
| 9.115.2.2 UCRAPredictor() [2/3]                                                                        | 758 |
| 9.115.2.3 UCRAPredictor() [3/3]                                                                        | 758 |
| 9.115.2.4 ~UCRAPredictor()                                                                             | 759 |
| 9.115.3 Member Function Documentation                                                                  | 759 |
| 9.115.3.1 init()                                                                                       | 759 |
| 9.115.3.2 learn()                                                                                      | 759 |
| 9.115.3.3 operator=() [1/2]                                                                            | 759 |
| 9.115.3.4 operator=() [2/2]                                                                            | 760 |
| 9.115.3.5 predict()                                                                                    | 760 |
| 9.115.3.6 score()                                                                                      | 760 |
| 9.115.3.7 top()                                                                                        | 761 |
| 9.116 LinkPred::UCSTPredictor< Network, EdgeRndIt, ScoreRndIt, EdgeRndOutIt > Class Template Reference | 762 |
| 9.116.1 Detailed Description                                                                           | 763 |
| 9.116.2 Constructor & Destructor Documentation                                                         | 763 |
| 9.116.2.1 UCSTPredictor() [1/3]                                                                        | 763 |
| 9.116.2.2 UCSTPredictor() [2/3]                                                                        | 763 |
| 9.116.2.3 UCSTPredictor() [3/3]                                                                        | 765 |
| 9.116.2.4 ~UCSTPredictor()                                                                             | 765 |
| 9.116.3 Member Function Documentation                                                                  | 765 |
| 9.116.3.1 init()                                                                                       | 765 |
| 9.116.3.2 learn()                                                                                      | 766 |
| 9.116.3.3 operator=() [1/2]                                                                            | 766 |
| 9.116.3.4 operator=() [2/2]                                                                            | 766 |
| 9.116.3.5 predict()                                                                                    | 767 |
| 9.116.3.6 score()                                                                                      | 767 |
| 9.116.3.7 top()                                                                                        | 767 |
| 9.117 LinkPred::UECLPredictor< Network, EdgeRndIt, ScoreRndIt, EdgeRndOutIt > Class Template Reference | 768 |

|                                                                                                        |     |
|--------------------------------------------------------------------------------------------------------|-----|
| 9.117.1 Detailed Description                                                                           | 769 |
| 9.117.2 Constructor & Destructor Documentation                                                         | 770 |
| 9.117.2.1 UECLPredictor() [1/3]                                                                        | 770 |
| 9.117.2.2 UECLPredictor() [2/3]                                                                        | 770 |
| 9.117.2.3 UECLPredictor() [3/3]                                                                        | 770 |
| 9.117.2.4 ~UECLPredictor()                                                                             | 771 |
| 9.117.3 Member Function Documentation                                                                  | 771 |
| 9.117.3.1 getClassifier()                                                                              | 771 |
| 9.117.3.2 getEncoder()                                                                                 | 771 |
| 9.117.3.3 getNegRatio()                                                                                | 772 |
| 9.117.3.4 getPosRatio()                                                                                | 772 |
| 9.117.3.5 init()                                                                                       | 772 |
| 9.117.3.6 learn()                                                                                      | 772 |
| 9.117.3.7 operator=() [1/2]                                                                            | 773 |
| 9.117.3.8 operator=() [2/2]                                                                            | 773 |
| 9.117.3.9 score()                                                                                      | 773 |
| 9.117.3.10 setClassifier()                                                                             | 774 |
| 9.117.3.11 setEncoder()                                                                                | 774 |
| 9.117.3.12 setNegRatio()                                                                               | 774 |
| 9.117.3.13 setPosRatio()                                                                               | 775 |
| 9.118 LinkPred::UESMPredictor< Network, EdgeRndIt, ScoreRndIt, EdgeRndOutIt > Class Template Reference | 775 |
| 9.118.1 Detailed Description                                                                           | 776 |
| 9.118.2 Constructor & Destructor Documentation                                                         | 777 |
| 9.118.2.1 UESMPredictor() [1/3]                                                                        | 777 |
| 9.118.2.2 UESMPredictor() [2/3]                                                                        | 777 |
| 9.118.2.3 UESMPredictor() [3/3]                                                                        | 777 |
| 9.118.2.4 ~UESMPredictor()                                                                             | 778 |
| 9.118.3 Member Function Documentation                                                                  | 778 |
| 9.118.3.1 getEncoder()                                                                                 | 778 |
| 9.118.3.2 getSimMeasure()                                                                              | 778 |
| 9.118.3.3 init()                                                                                       | 779 |
| 9.118.3.4 learn()                                                                                      | 779 |
| 9.118.3.5 operator=() [1/2]                                                                            | 779 |
| 9.118.3.6 operator=() [2/2]                                                                            | 779 |
| 9.118.3.7 score()                                                                                      | 780 |
| 9.118.3.8 setEncoder()                                                                                 | 780 |
| 9.118.3.9 setSimMeasure()                                                                              | 781 |
| 9.119 LinkPred::UFBMPredictor< Network, EdgeRndIt, ScoreRndIt, EdgeRndOutIt > Class Template Reference | 781 |
| 9.119.1 Detailed Description                                                                           | 782 |
| 9.119.2 Constructor & Destructor Documentation                                                         | 782 |
| 9.119.2.1 UFBMPredictor() [1/3]                                                                        | 782 |

|                                                                                                        |     |
|--------------------------------------------------------------------------------------------------------|-----|
| 9.119.2.2 UFBMPredictor() [2/3]                                                                        | 783 |
| 9.119.2.3 UFBMPredictor() [3/3]                                                                        | 783 |
| 9.119.2.4 ~UFBMPredictor()                                                                             | 783 |
| 9.119.3 Member Function Documentation                                                                  | 784 |
| 9.119.3.1 getMaxIter()                                                                                 | 784 |
| 9.119.3.2 init()                                                                                       | 784 |
| 9.119.3.3 learn()                                                                                      | 784 |
| 9.119.3.4 operator=() [1/2]                                                                            | 784 |
| 9.119.3.5 operator=() [2/2]                                                                            | 785 |
| 9.119.3.6 predict()                                                                                    | 785 |
| 9.119.3.7 score()                                                                                      | 785 |
| 9.119.3.8 setMaxIter()                                                                                 | 786 |
| 9.120 LinkPred::UHDIPredictor< Network, EdgeRndIt, ScoreRndIt, EdgeRndOutIt > Class Template Reference | 786 |
| 9.120.1 Detailed Description                                                                           | 787 |
| 9.120.2 Constructor & Destructor Documentation                                                         | 788 |
| 9.120.2.1 UHDIPredictor() [1/3]                                                                        | 788 |
| 9.120.2.2 UHDIPredictor() [2/3]                                                                        | 788 |
| 9.120.2.3 UHDIPredictor() [3/3]                                                                        | 788 |
| 9.120.2.4 ~UHDIPredictor()                                                                             | 789 |
| 9.120.3 Member Function Documentation                                                                  | 789 |
| 9.120.3.1 init()                                                                                       | 789 |
| 9.120.3.2 learn()                                                                                      | 789 |
| 9.120.3.3 operator=() [1/2]                                                                            | 790 |
| 9.120.3.4 operator=() [2/2]                                                                            | 790 |
| 9.120.3.5 predict()                                                                                    | 790 |
| 9.120.3.6 score()                                                                                      | 791 |
| 9.120.3.7 top()                                                                                        | 791 |
| 9.121 LinkPred::UHPIPredictor< Network, EdgeRndIt, ScoreRndIt, EdgeRndOutIt > Class Template Reference | 792 |
| 9.121.1 Detailed Description                                                                           | 793 |
| 9.121.2 Constructor & Destructor Documentation                                                         | 793 |
| 9.121.2.1 UHPIPredictor() [1/3]                                                                        | 793 |
| 9.121.2.2 UHPIPredictor() [2/3]                                                                        | 793 |
| 9.121.2.3 UHPIPredictor() [3/3]                                                                        | 794 |
| 9.121.2.4 ~UHPIPredictor()                                                                             | 794 |
| 9.121.3 Member Function Documentation                                                                  | 794 |
| 9.121.3.1 init()                                                                                       | 794 |
| 9.121.3.2 learn()                                                                                      | 795 |
| 9.121.3.3 operator=() [1/2]                                                                            | 795 |
| 9.121.3.4 operator=() [2/2]                                                                            | 795 |
| 9.121.3.5 predict()                                                                                    | 796 |
| 9.121.3.6 score()                                                                                      | 796 |

|                                                                                              |     |
|----------------------------------------------------------------------------------------------|-----|
| 9.121.3.7 top()                                                                              | 796 |
| 9.122 LinkPred::UHRGPredictor< Network, EdgeRndIt, ScoreRndIt, EdgeRndOutIt > Class Template |     |
| Reference                                                                                    | 797 |
| 9.122.1 Detailed Description                                                                 | 798 |
| 9.122.2 Constructor & Destructor Documentation                                               | 799 |
| 9.122.2.1 UHRGPredictor() [1/3]                                                              | 799 |
| 9.122.2.2 UHRGPredictor() [2/3]                                                              | 799 |
| 9.122.2.3 UHRGPredictor() [3/3]                                                              | 799 |
| 9.122.2.4 ~UHRGPredictor()                                                                   | 799 |
| 9.122.3 Member Function Documentation                                                        | 800 |
| 9.122.3.1 getNbBeans()                                                                       | 800 |
| 9.122.3.2 getNbSamples()                                                                     | 800 |
| 9.122.3.3 init()                                                                             | 800 |
| 9.122.3.4 learn()                                                                            | 801 |
| 9.122.3.5 operator=() [1/2]                                                                  | 801 |
| 9.122.3.6 operator=() [2/2]                                                                  | 801 |
| 9.122.3.7 predict()                                                                          | 801 |
| 9.122.3.8 score()                                                                            | 802 |
| 9.122.3.9 setNbBeans()                                                                       | 802 |
| 9.122.3.10 setNbSamples()                                                                    | 803 |
| 9.123 LinkPred::UHYPPredictor< Network, EdgeRndIt, ScoreRndIt, EdgeRndOutIt > Class Template |     |
| Reference                                                                                    | 803 |
| 9.123.1 Detailed Description                                                                 | 804 |
| 9.123.2 Constructor & Destructor Documentation                                               | 804 |
| 9.123.2.1 UHYPPredictor() [1/3]                                                              | 805 |
| 9.123.2.2 UHYPPredictor() [2/3]                                                              | 805 |
| 9.123.2.3 UHYPPredictor() [3/3]                                                              | 805 |
| 9.123.2.4 ~UHYPPredictor()                                                                   | 806 |
| 9.123.3 Member Function Documentation                                                        | 806 |
| 9.123.3.1 getGamma()                                                                         | 806 |
| 9.123.3.2 getL()                                                                             | 806 |
| 9.123.3.3 getM()                                                                             | 806 |
| 9.123.3.4 getSeed()                                                                          | 807 |
| 9.123.3.5 getT()                                                                             | 807 |
| 9.123.3.6 getZeta()                                                                          | 807 |
| 9.123.3.7 init()                                                                             | 807 |
| 9.123.3.8 learn()                                                                            | 808 |
| 9.123.3.9 operator=() [1/2]                                                                  | 808 |
| 9.123.3.10 operator=() [2/2]                                                                 | 808 |
| 9.123.3.11 predict()                                                                         | 809 |
| 9.123.3.12 score()                                                                           | 809 |
| 9.123.3.13 setGamma()                                                                        | 809 |
| 9.123.3.14 setL()                                                                            | 810 |

|                                                                                                        |     |
|--------------------------------------------------------------------------------------------------------|-----|
| 9.123.3.15 setM()                                                                                      | 810 |
| 9.123.3.16 setT()                                                                                      | 810 |
| 9.123.3.17 setZeta()                                                                                   | 811 |
| 9.124 LinkPred::UJIDPredictor< Network, EdgeRndIt, ScoreRndIt, EdgeRndOutIt > Class Template Reference | 811 |
| 9.124.1 Detailed Description                                                                           | 812 |
| 9.124.2 Constructor & Destructor Documentation                                                         | 813 |
| 9.124.2.1 UJIDPredictor() [1/3]                                                                        | 813 |
| 9.124.2.2 UJIDPredictor() [2/3]                                                                        | 813 |
| 9.124.2.3 UJIDPredictor() [3/3]                                                                        | 813 |
| 9.124.2.4 ~UJIDPredictor()                                                                             | 814 |
| 9.124.3 Member Function Documentation                                                                  | 814 |
| 9.124.3.1 init()                                                                                       | 814 |
| 9.124.3.2 learn()                                                                                      | 814 |
| 9.124.3.3 operator=() [1/2]                                                                            | 814 |
| 9.124.3.4 operator=() [2/2]                                                                            | 815 |
| 9.124.3.5 predict()                                                                                    | 815 |
| 9.124.3.6 score()                                                                                      | 815 |
| 9.124.3.7 top()                                                                                        | 816 |
| 9.125 LinkPred::UKABPredictor< Network, EdgeRndIt, ScoreRndIt, EdgeRndOutIt > Class Template Reference | 817 |
| 9.125.1 Detailed Description                                                                           | 818 |
| 9.125.2 Member Typedef Documentation                                                                   | 818 |
| 9.125.2.1 Edge                                                                                         | 818 |
| 9.125.2.2 NodeID                                                                                       | 818 |
| 9.125.3 Constructor & Destructor Documentation                                                         | 819 |
| 9.125.3.1 UKABPredictor() [1/3]                                                                        | 819 |
| 9.125.3.2 UKABPredictor() [2/3]                                                                        | 819 |
| 9.125.3.3 UKABPredictor() [3/3]                                                                        | 819 |
| 9.125.3.4 ~UKABPredictor()                                                                             | 820 |
| 9.125.4 Member Function Documentation                                                                  | 820 |
| 9.125.4.1 getCacheLevel()                                                                              | 820 |
| 9.125.4.2 getHorizLim()                                                                                | 820 |
| 9.125.4.3 init()                                                                                       | 821 |
| 9.125.4.4 learn()                                                                                      | 821 |
| 9.125.4.5 operator=() [1/2]                                                                            | 821 |
| 9.125.4.6 operator=() [2/2]                                                                            | 821 |
| 9.125.4.7 predict()                                                                                    | 822 |
| 9.125.4.8 score()                                                                                      | 822 |
| 9.125.4.9 setCacheLevel()                                                                              | 823 |
| 9.125.4.10 setHorizLim()                                                                               | 823 |
| 9.125.4.11 top()                                                                                       | 823 |



|                                                                                                          |     |
|----------------------------------------------------------------------------------------------------------|-----|
| 9.126 LinkPred::ULCPPredictor< Network, EdgeRndIt, ScoreRndIt, EdgeRndOutIt > Class Template Reference   | 824 |
| 9.126.1 Detailed Description                                                                             | 825 |
| 9.126.2 Constructor & Destructor Documentation                                                           | 825 |
| 9.126.2.1 ULCPPredictor() [1/3]                                                                          | 825 |
| 9.126.2.2 ULCPPredictor() [2/3]                                                                          | 826 |
| 9.126.2.3 ULCPPredictor() [3/3]                                                                          | 826 |
| 9.126.2.4 ~ULCPPredictor()                                                                               | 826 |
| 9.126.3 Member Function Documentation                                                                    | 826 |
| 9.126.3.1 getEpsilon()                                                                                   | 827 |
| 9.126.3.2 init()                                                                                         | 827 |
| 9.126.3.3 learn()                                                                                        | 827 |
| 9.126.3.4 operator=() [1/2]                                                                              | 827 |
| 9.126.3.5 operator=() [2/2]                                                                              | 828 |
| 9.126.3.6 predict()                                                                                      | 828 |
| 9.126.3.7 score()                                                                                        | 828 |
| 9.126.3.8 setEpsilon()                                                                                   | 829 |
| 9.127 LinkPred::ULHNPredictor< Network, EdgeRndIt, ScoreRndIt, EdgeRndOutIt > Class Template Reference   | 829 |
| 9.127.1 Detailed Description                                                                             | 830 |
| 9.127.2 Constructor & Destructor Documentation                                                           | 831 |
| 9.127.2.1 ULHNPredictor() [1/3]                                                                          | 831 |
| 9.127.2.2 ULHNPredictor() [2/3]                                                                          | 831 |
| 9.127.2.3 ULHNPredictor() [3/3]                                                                          | 831 |
| 9.127.2.4 ~ULHNPredictor()                                                                               | 832 |
| 9.127.3 Member Function Documentation                                                                    | 832 |
| 9.127.3.1 init()                                                                                         | 832 |
| 9.127.3.2 learn()                                                                                        | 832 |
| 9.127.3.3 operator=() [1/2]                                                                              | 833 |
| 9.127.3.4 operator=() [2/2]                                                                              | 833 |
| 9.127.3.5 predict()                                                                                      | 833 |
| 9.127.3.6 score()                                                                                        | 834 |
| 9.127.3.7 top()                                                                                          | 834 |
| 9.128 LinkPred::ULPredictor< NetworkT, EdgeRndItT, ScoreRndItT, EdgeRndOutItT > Class Template Reference | 835 |
| 9.128.1 Detailed Description                                                                             | 835 |
| 9.128.2 Member Typedef Documentation                                                                     | 836 |
| 9.128.2.1 Edge                                                                                           | 836 |
| 9.128.2.2 EdgeRndIt                                                                                      | 836 |
| 9.128.2.3 EdgeRndOutIt                                                                                   | 836 |
| 9.128.2.4 Network                                                                                        | 837 |
| 9.128.2.5 NodeID                                                                                         | 837 |
| 9.128.2.6 ScoreRndIt                                                                                     | 837 |

|                                                                                                        |     |
|--------------------------------------------------------------------------------------------------------|-----|
| 9.128.3 Constructor & Destructor Documentation                                                         | 837 |
| 9.128.3.1 ULPredictor() [1/3]                                                                          | 837 |
| 9.128.3.2 ULPredictor() [2/3]                                                                          | 838 |
| 9.128.3.3 ULPredictor() [3/3]                                                                          | 838 |
| 9.128.3.4 ~ULPredictor()                                                                               | 838 |
| 9.128.4 Member Function Documentation                                                                  | 838 |
| 9.128.4.1 getName()                                                                                    | 839 |
| 9.128.4.2 getNet()                                                                                     | 839 |
| 9.128.4.3 init()                                                                                       | 839 |
| 9.128.4.4 learn()                                                                                      | 840 |
| 9.128.4.5 operator=() [1/2]                                                                            | 840 |
| 9.128.4.6 operator=() [2/2]                                                                            | 840 |
| 9.128.4.7 predict()                                                                                    | 841 |
| 9.128.4.8 predictNeg()                                                                                 | 841 |
| 9.128.4.9 score()                                                                                      | 842 |
| 9.128.4.10 setName()                                                                                   | 842 |
| 9.128.4.11 top()                                                                                       | 843 |
| 9.129 LinkPred::UMPSPredictor< Network, EdgeRndIt, ScoreRndIt, EdgeRndOutIt > Class Template Reference | 843 |
| 9.129.1 Detailed Description                                                                           | 845 |
| 9.129.2 Member Enumeration Documentation                                                               | 846 |
| 9.129.2.1 EdgeLengthMethod                                                                             | 846 |
| 9.129.2.2 LambdaMethod                                                                                 | 846 |
| 9.129.2.3 LandmarkStrategy                                                                             | 846 |
| 9.129.3 Constructor & Destructor Documentation                                                         | 847 |
| 9.129.3.1 UMPSPredictor() [1/3]                                                                        | 847 |
| 9.129.3.2 UMPSPredictor() [2/3]                                                                        | 847 |
| 9.129.3.3 UMPSPredictor() [3/3]                                                                        | 847 |
| 9.129.3.4 ~UMPSPredictor()                                                                             | 848 |
| 9.129.4 Member Function Documentation                                                                  | 848 |
| 9.129.4.1 getAsp()                                                                                     | 848 |
| 9.129.4.2 getCacheLevel()                                                                              | 848 |
| 9.129.4.3 getEdgeLengthMethod()                                                                        | 849 |
| 9.129.4.4 getLambda()                                                                                  | 849 |
| 9.129.4.5 getLambdaMethod()                                                                            | 849 |
| 9.129.4.6 getLambdaNegEstRatio()                                                                       | 849 |
| 9.129.4.7 getLambdaPosEstRatio()                                                                       | 850 |
| 9.129.4.8 getLambdaStep()                                                                              | 850 |
| 9.129.4.9 getLandmarkRatio()                                                                           | 850 |
| 9.129.4.10 getLandmarkStrategy()                                                                       | 850 |
| 9.129.4.11 getLength()                                                                                 | 851 |
| 9.129.4.12 getMaxLambda()                                                                              | 851 |

|                                                                                                        |     |
|--------------------------------------------------------------------------------------------------------|-----|
| 9.129.4.13 getMinLambda()                                                                              | 851 |
| 9.129.4.14 getNegScore()                                                                               | 851 |
| 9.129.4.15 getPerfMeasure()                                                                            | 852 |
| 9.129.4.16 getPosScore()                                                                               | 852 |
| 9.129.4.17 getTol()                                                                                    | 852 |
| 9.129.4.18 init()                                                                                      | 852 |
| 9.129.4.19 learn()                                                                                     | 853 |
| 9.129.4.20 operator=() [1/2]                                                                           | 853 |
| 9.129.4.21 operator=() [2/2]                                                                           | 853 |
| 9.129.4.22 predict()                                                                                   | 854 |
| 9.129.4.23 score()                                                                                     | 854 |
| 9.129.4.24 setAsp()                                                                                    | 854 |
| 9.129.4.25 setCacheLevel()                                                                             | 855 |
| 9.129.4.26 setEdgeLengthMethod()                                                                       | 855 |
| 9.129.4.27 setLambda()                                                                                 | 855 |
| 9.129.4.28 setLambdaMethod()                                                                           | 856 |
| 9.129.4.29 setLambdaNegEstRatio()                                                                      | 856 |
| 9.129.4.30 setLambdaPosEstRatio()                                                                      | 856 |
| 9.129.4.31 setLambdaStep()                                                                             | 858 |
| 9.129.4.32 setLandmarkRatio()                                                                          | 858 |
| 9.129.4.33 setLandmarkStrategy()                                                                       | 858 |
| 9.129.4.34 setMaxLambda()                                                                              | 859 |
| 9.129.4.35 setMinLambda()                                                                              | 859 |
| 9.129.4.36 setNegScore()                                                                               | 859 |
| 9.129.4.37 setPerfMeasure()                                                                            | 860 |
| 9.129.4.38 setPosScore()                                                                               | 860 |
| 9.129.4.39 setTol()                                                                                    | 860 |
| 9.130 LinkPred::UNEDPredictor< Network, EdgeRndIt, ScoreRndIt, EdgeRndOutIt > Class Template Reference | 861 |
| 9.130.1 Detailed Description                                                                           | 862 |
| 9.130.2 Member Typedef Documentation                                                                   | 862 |
| 9.130.2.1 Edge                                                                                         | 862 |
| 9.130.2.2 NodeID                                                                                       | 863 |
| 9.130.3 Constructor & Destructor Documentation                                                         | 863 |
| 9.130.3.1 UNEDPredictor() [1/3]                                                                        | 863 |
| 9.130.3.2 UNEDPredictor() [2/3]                                                                        | 863 |
| 9.130.3.3 UNEDPredictor() [3/3]                                                                        | 863 |
| 9.130.3.4 ~UNEDPredictor()                                                                             | 864 |
| 9.130.4 Member Function Documentation                                                                  | 864 |
| 9.130.4.1 init()                                                                                       | 864 |
| 9.130.4.2 learn()                                                                                      | 864 |
| 9.130.4.3 operator=() [1/2]                                                                            | 865 |

|                                                                             |     |
|-----------------------------------------------------------------------------|-----|
| 9.130.4.4 operator=() [2/2]                                                 | 865 |
| 9.130.4.5 predict()                                                         | 865 |
| 9.130.4.6 score()                                                           | 866 |
| 9.130.4.7 top()                                                             | 866 |
| 9.131 LinkPred::UNetwork< LabelT, NodeIDT, EdgeT > Class Template Reference | 867 |
| 9.131.1 Detailed Description                                                | 869 |
| 9.131.2 Member Typedef Documentation                                        | 870 |
| 9.131.2.1 Edge                                                              | 870 |
| 9.131.2.2 Edgelt                                                            | 870 |
| 9.131.2.3 EdgeMapSP                                                         | 870 |
| 9.131.2.4 Label                                                             | 870 |
| 9.131.2.5 LabelIt                                                           | 870 |
| 9.131.2.6 NodeID                                                            | 871 |
| 9.131.2.7 NodeIt                                                            | 871 |
| 9.131.2.8 NodeMapSP                                                         | 871 |
| 9.131.2.9 NodeSMapSP                                                        | 871 |
| 9.131.3 Constructor & Destructor Documentation                              | 871 |
| 9.131.3.1 UNetwork() [1/4]                                                  | 871 |
| 9.131.3.2 UNetwork() [2/4]                                                  | 871 |
| 9.131.3.3 UNetwork() [3/4]                                                  | 872 |
| 9.131.3.4 UNetwork() [4/4]                                                  | 872 |
| 9.131.3.5 ~UNetwork()                                                       | 872 |
| 9.131.4 Member Function Documentation                                       | 872 |
| 9.131.4.1 addEdge()                                                         | 873 |
| 9.131.4.2 addNode()                                                         | 873 |
| 9.131.4.3 assemble()                                                        | 873 |
| 9.131.4.4 compareEdgeEnd()                                                  | 873 |
| 9.131.4.5 coupleAtOrd()                                                     | 874 |
| 9.131.4.6 coupleOrd()                                                       | 874 |
| 9.131.4.7 createEdgeMap()                                                   | 874 |
| 9.131.4.8 createEdgeMapSP()                                                 | 875 |
| 9.131.4.9 createNodeMap()                                                   | 875 |
| 9.131.4.10 createNodeMapSP()                                                | 876 |
| 9.131.4.11 createNodeSMap()                                                 | 876 |
| 9.131.4.12 createNodeSMapSP()                                               | 876 |
| 9.131.4.13 edgesBegin()                                                     | 877 |
| 9.131.4.14 edgesEnd()                                                       | 877 |
| 9.131.4.15 end()                                                            | 877 |
| 9.131.4.16 findLabel()                                                      | 878 |
| 9.131.4.17 findNode()                                                       | 878 |
| 9.131.4.18 generateERN()                                                    | 878 |
| 9.131.4.19 generateREG()                                                    | 879 |

|                                       |     |
|---------------------------------------|-----|
| 9.131.4.20 generateRNC()              | 879 |
| 9.131.4.21 getAvgDeg()                | 879 |
| 9.131.4.22 getCC() [1/2]              | 880 |
| 9.131.4.23 getCC() [2/2]              | 880 |
| 9.131.4.24 getCommonNeighbors() [1/2] | 880 |
| 9.131.4.25 getCommonNeighbors() [2/2] | 881 |
| 9.131.4.26 getCSR()                   | 881 |
| 9.131.4.27 getDeg()                   | 881 |
| 9.131.4.28 getDegStat()               | 882 |
| 9.131.4.29 getID()                    | 882 |
| 9.131.4.30 getLabel()                 | 882 |
| 9.131.4.31 getMaxDeg()                | 883 |
| 9.131.4.32 getMinDeg()                | 883 |
| 9.131.4.33 getNbCommonNeighbors()     | 883 |
| 9.131.4.34 getNbCouples()             | 884 |
| 9.131.4.35 getNbEdges()               | 884 |
| 9.131.4.36 getNbInEdges()             | 884 |
| 9.131.4.37 getNbNodes()               | 885 |
| 9.131.4.38 getNbNonEdges()            | 885 |
| 9.131.4.39 getNbPaths()               | 885 |
| 9.131.4.40 isEdge() [1/2]             | 885 |
| 9.131.4.41 isEdge() [2/2]             | 886 |
| 9.131.4.42 labelsBegin()              | 886 |
| 9.131.4.43 labelsEnd()                | 887 |
| 9.131.4.44 makeEdge()                 | 887 |
| 9.131.4.45 neighbBegin()              | 887 |
| 9.131.4.46 neighbEnd()                | 888 |
| 9.131.4.47 nodesBegin()               | 888 |
| 9.131.4.48 nodesDegBegin()            | 888 |
| 9.131.4.49 nodesDegEnd()              | 888 |
| 9.131.4.50 nodesEnd()                 | 889 |
| 9.131.4.51 nonEdgesBegin()            | 889 |
| 9.131.4.52 nonEdgesEnd()              | 889 |
| 9.131.4.53 operator=() [1/2]          | 889 |
| 9.131.4.54 operator=() [2/2]          | 890 |
| 9.131.4.55 print()                    | 890 |
| 9.131.4.56 printEdges()               | 890 |
| 9.131.4.57 read()                     | 890 |
| 9.131.4.58 readEdges()                | 891 |
| 9.131.4.59 reverseEdge()              | 891 |
| 9.131.4.60 rndEdgesBegin()            | 892 |
| 9.131.4.61 rndEdgesEnd()              | 892 |

|                                                                                                        |     |
|--------------------------------------------------------------------------------------------------------|-----|
| 9.131.4.62 rndNodesBegin()                                                                             | 892 |
| 9.131.4.63 rndNodesEnd()                                                                               | 893 |
| 9.131.4.64 rndNonEdgesBegin()                                                                          | 893 |
| 9.131.4.65 rndNonEdgesEnd()                                                                            | 893 |
| 9.131.4.66 shuffle()                                                                                   | 894 |
| 9.131.4.67 start()                                                                                     | 894 |
| 9.131.4.68 write()                                                                                     | 894 |
| 9.132 LinkPred::UPATPredictor< Network, EdgeRndIt, ScoreRndIt, EdgeRndOutIt > Class Template Reference | 895 |
| 9.132.1 Detailed Description                                                                           | 896 |
| 9.132.2 Constructor & Destructor Documentation                                                         | 896 |
| 9.132.2.1 UPATPredictor() [1/3]                                                                        | 896 |
| 9.132.2.2 UPATPredictor() [2/3]                                                                        | 896 |
| 9.132.2.3 UPATPredictor() [3/3]                                                                        | 897 |
| 9.132.2.4 ~UPATPredictor()                                                                             | 897 |
| 9.132.3 Member Function Documentation                                                                  | 897 |
| 9.132.3.1 init()                                                                                       | 897 |
| 9.132.3.2 learn()                                                                                      | 898 |
| 9.132.3.3 operator=() [1/2]                                                                            | 898 |
| 9.132.3.4 operator=() [2/2]                                                                            | 898 |
| 9.132.3.5 predict()                                                                                    | 899 |
| 9.132.3.6 score()                                                                                      | 899 |
| 9.132.3.7 top()                                                                                        | 899 |
| 9.133 LinkPred::UPSTPredictor< Network, EdgeRndIt, ScoreRndIt, EdgeRndOutIt > Class Template Reference | 900 |
| 9.133.1 Detailed Description                                                                           | 901 |
| 9.133.2 Constructor & Destructor Documentation                                                         | 902 |
| 9.133.2.1 UPSTPredictor() [1/3]                                                                        | 902 |
| 9.133.2.2 UPSTPredictor() [2/3]                                                                        | 902 |
| 9.133.2.3 UPSTPredictor() [3/3]                                                                        | 902 |
| 9.133.2.4 ~UPSTPredictor()                                                                             | 903 |
| 9.133.3 Member Function Documentation                                                                  | 903 |
| 9.133.3.1 init()                                                                                       | 903 |
| 9.133.3.2 learn()                                                                                      | 903 |
| 9.133.3.3 loadEdgeScores()                                                                             | 903 |
| 9.133.3.4 operator=() [1/2]                                                                            | 904 |
| 9.133.3.5 operator=() [2/2]                                                                            | 904 |
| 9.133.3.6 score()                                                                                      | 904 |
| 9.133.3.7 setEdgeScores()                                                                              | 905 |
| 9.134 LinkPred::URALPredictor< Network, EdgeRndIt, ScoreRndIt, EdgeRndOutIt > Class Template Reference | 905 |
| 9.134.1 Detailed Description                                                                           | 906 |
| 9.134.2 Constructor & Destructor Documentation                                                         | 907 |

|                                                                                                        |     |
|--------------------------------------------------------------------------------------------------------|-----|
| 9.134.2.1 URALPredictor() [1/3]                                                                        | 907 |
| 9.134.2.2 URALPredictor() [2/3]                                                                        | 907 |
| 9.134.2.3 URALPredictor() [3/3]                                                                        | 907 |
| 9.134.2.4 ~URALPredictor()                                                                             | 908 |
| 9.134.3 Member Function Documentation                                                                  | 908 |
| 9.134.3.1 init()                                                                                       | 908 |
| 9.134.3.2 learn()                                                                                      | 908 |
| 9.134.3.3 operator=() [1/2]                                                                            | 909 |
| 9.134.3.4 operator=() [2/2]                                                                            | 909 |
| 9.134.3.5 predict()                                                                                    | 909 |
| 9.134.3.6 score()                                                                                      | 910 |
| 9.134.3.7 top()                                                                                        | 910 |
| 9.135 LinkPred::URNDPredictor< Network, EdgeRndIt, ScoreRndIt, EdgeRndOutIt > Class Template Reference | 911 |
| 9.135.1 Detailed Description                                                                           | 912 |
| 9.135.2 Constructor & Destructor Documentation                                                         | 912 |
| 9.135.2.1 URNDPredictor() [1/3]                                                                        | 912 |
| 9.135.2.2 URNDPredictor() [2/3]                                                                        | 912 |
| 9.135.2.3 URNDPredictor() [3/3]                                                                        | 913 |
| 9.135.2.4 ~URNDPredictor()                                                                             | 913 |
| 9.135.3 Member Function Documentation                                                                  | 913 |
| 9.135.3.1 init()                                                                                       | 913 |
| 9.135.3.2 learn()                                                                                      | 914 |
| 9.135.3.3 operator=() [1/2]                                                                            | 914 |
| 9.135.3.4 operator=() [2/2]                                                                            | 914 |
| 9.135.3.5 predict()                                                                                    | 915 |
| 9.135.3.6 score()                                                                                      | 915 |
| 9.136 LinkPred::USAPredictor< Network, EdgeRndIt, ScoreRndIt, EdgeRndOutIt > Class Template Reference  | 915 |
| 9.136.1 Detailed Description                                                                           | 917 |
| 9.136.2 Constructor & Destructor Documentation                                                         | 918 |
| 9.136.2.1 USAPredictor() [1/3]                                                                         | 918 |
| 9.136.2.2 USAPredictor() [2/3]                                                                         | 918 |
| 9.136.2.3 USAPredictor() [3/3]                                                                         | 918 |
| 9.136.2.4 ~USAPredictor()                                                                              | 919 |
| 9.136.3 Member Function Documentation                                                                  | 919 |
| 9.136.3.1 init()                                                                                       | 919 |
| 9.136.3.2 learn()                                                                                      | 919 |
| 9.136.3.3 operator=() [1/2]                                                                            | 920 |
| 9.136.3.4 operator=() [2/2]                                                                            | 920 |
| 9.136.3.5 predict()                                                                                    | 920 |
| 9.136.3.6 score()                                                                                      | 921 |
| 9.136.3.7 top()                                                                                        | 921 |

|                                                                                                        |     |
|--------------------------------------------------------------------------------------------------------|-----|
| 9.137 LinkPred::USBMPredictor< Network, EdgeRndIt, ScoreRndIt, EdgeRndOutIt > Class Template Reference | 922 |
| 9.137.1 Detailed Description                                                                           | 923 |
| 9.137.2 Constructor & Destructor Documentation                                                         | 923 |
| 9.137.2.1 USBMPredictor() [1/3]                                                                        | 923 |
| 9.137.2.2 USBMPredictor() [2/3]                                                                        | 923 |
| 9.137.2.3 USBMPredictor() [3/3]                                                                        | 924 |
| 9.137.2.4 ~USBMPredictor()                                                                             | 924 |
| 9.137.3 Member Function Documentation                                                                  | 924 |
| 9.137.3.1 getMaxIter()                                                                                 | 924 |
| 9.137.3.2 init()                                                                                       | 925 |
| 9.137.3.3 learn()                                                                                      | 925 |
| 9.137.3.4 operator=() [1/2]                                                                            | 925 |
| 9.137.3.5 operator=() [2/2]                                                                            | 925 |
| 9.137.3.6 predict()                                                                                    | 926 |
| 9.137.3.7 score()                                                                                      | 926 |
| 9.137.3.8 setMaxIter()                                                                                 | 927 |
| 9.138 LinkPred::USHPPredictor< Network, EdgeRndIt, ScoreRndIt, EdgeRndOutIt > Class Template Reference | 927 |
| 9.138.1 Detailed Description                                                                           | 928 |
| 9.138.2 Member Enumeration Documentation                                                               | 929 |
| 9.138.2.1 LandmarkStrategy                                                                             | 929 |
| 9.138.3 Constructor & Destructor Documentation                                                         | 929 |
| 9.138.3.1 USHPPredictor() [1/3]                                                                        | 929 |
| 9.138.3.2 USHPPredictor() [2/3]                                                                        | 930 |
| 9.138.3.3 USHPPredictor() [3/3]                                                                        | 930 |
| 9.138.3.4 ~USHPPredictor()                                                                             | 930 |
| 9.138.4 Member Function Documentation                                                                  | 930 |
| 9.138.4.1 getAsp()                                                                                     | 931 |
| 9.138.4.2 getCacheLevel()                                                                              | 931 |
| 9.138.4.3 getLandmarkRatio()                                                                           | 931 |
| 9.138.4.4 getLandmarkStrategy()                                                                        | 931 |
| 9.138.4.5 init()                                                                                       | 932 |
| 9.138.4.6 learn()                                                                                      | 932 |
| 9.138.4.7 operator=() [1/2]                                                                            | 932 |
| 9.138.4.8 operator=() [2/2]                                                                            | 932 |
| 9.138.4.9 predict()                                                                                    | 933 |
| 9.138.4.10 score()                                                                                     | 933 |
| 9.138.4.11 setAsp()                                                                                    | 934 |
| 9.138.4.12 setCacheLevel()                                                                             | 934 |
| 9.138.4.13 setLandmarkRatio()                                                                          | 934 |
| 9.138.4.14 setLandmarkStrategy()                                                                       | 935 |



|                                                                                                        |     |
|--------------------------------------------------------------------------------------------------------|-----|
| 9.139 LinkPred::USOIPredictor< Network, EdgeRndIt, ScoreRndIt, EdgeRndOutIt > Class Template Reference | 935 |
| 9.139.1 Detailed Description                                                                           | 936 |
| 9.139.2 Constructor & Destructor Documentation                                                         | 937 |
| 9.139.2.1 USOIPredictor() [1/3]                                                                        | 937 |
| 9.139.2.2 USOIPredictor() [2/3]                                                                        | 937 |
| 9.139.2.3 USOIPredictor() [3/3]                                                                        | 937 |
| 9.139.2.4 ~USOIPredictor()                                                                             | 938 |
| 9.139.3 Member Function Documentation                                                                  | 938 |
| 9.139.3.1 init()                                                                                       | 938 |
| 9.139.3.2 learn()                                                                                      | 938 |
| 9.139.3.3 operator=() [1/2]                                                                            | 938 |
| 9.139.3.4 operator=() [2/2]                                                                            | 939 |
| 9.139.3.5 predict()                                                                                    | 939 |
| 9.139.3.6 score()                                                                                      | 939 |
| 9.139.3.7 top()                                                                                        | 940 |
| 9.140 LinkPred::USUMPredictor< Network, EdgeRndIt, ScoreRndIt, EdgeRndOutIt > Class Template Reference | 941 |
| 9.140.1 Detailed Description                                                                           | 942 |
| 9.140.2 Constructor & Destructor Documentation                                                         | 942 |
| 9.140.2.1 USUMPredictor() [1/3]                                                                        | 942 |
| 9.140.2.2 USUMPredictor() [2/3]                                                                        | 942 |
| 9.140.2.3 USUMPredictor() [3/3]                                                                        | 943 |
| 9.140.2.4 ~USUMPredictor()                                                                             | 943 |
| 9.140.3 Member Function Documentation                                                                  | 943 |
| 9.140.3.1 init()                                                                                       | 943 |
| 9.140.3.2 learn()                                                                                      | 944 |
| 9.140.3.3 operator=() [1/2]                                                                            | 944 |
| 9.140.3.4 operator=() [2/2]                                                                            | 944 |
| 9.140.3.5 predict()                                                                                    | 945 |
| 9.140.3.6 score()                                                                                      | 945 |
| 9.140.3.7 top()                                                                                        | 945 |
| 9.141 LinkPred::Vec Class Reference                                                                    | 946 |
| 9.141.1 Detailed Description                                                                           | 948 |
| 9.141.2 Constructor & Destructor Documentation                                                         | 948 |
| 9.141.2.1 Vec() [1/8]                                                                                  | 948 |
| 9.141.2.2 Vec() [2/8]                                                                                  | 948 |
| 9.141.2.3 Vec() [3/8]                                                                                  | 948 |
| 9.141.2.4 Vec() [4/8]                                                                                  | 949 |
| 9.141.2.5 Vec() [5/8]                                                                                  | 949 |
| 9.141.2.6 Vec() [6/8]                                                                                  | 949 |
| 9.141.2.7 Vec() [7/8]                                                                                  | 950 |
| 9.141.2.8 Vec() [8/8]                                                                                  | 950 |

|                                       |     |
|---------------------------------------|-----|
| 9.141.2.9 $\sim$ Vec()                | 950 |
| 9.141.3 Member Function Documentation | 950 |
| 9.141.3.1 amax() [1/2]                | 950 |
| 9.141.3.2 amax() [2/2]                | 951 |
| 9.141.3.3 amin() [1/2]                | 951 |
| 9.141.3.4 amin() [2/2]                | 951 |
| 9.141.3.5 axpy()                      | 951 |
| 9.141.3.6 center() [1/2]              | 952 |
| 9.141.3.7 center() [2/2]              | 952 |
| 9.141.3.8 find()                      | 952 |
| 9.141.3.9 findNz()                    | 952 |
| 9.141.3.10 getValues()                | 953 |
| 9.141.3.11 ifmax()                    | 953 |
| 9.141.3.12 ifmin()                    | 953 |
| 9.141.3.13 ilmax()                    | 953 |
| 9.141.3.14 ilmin()                    | 953 |
| 9.141.3.15 imax()                     | 954 |
| 9.141.3.16 imin()                     | 954 |
| 9.141.3.17 isConstant()               | 954 |
| 9.141.3.18 makeConstant()             | 954 |
| 9.141.3.19 max() [1/2]                | 955 |
| 9.141.3.20 max() [2/2]                | 955 |
| 9.141.3.21 mean() [1/2]               | 955 |
| 9.141.3.22 mean() [2/2]               | 955 |
| 9.141.3.23 min() [1/2]                | 956 |
| 9.141.3.24 min() [2/2]                | 956 |
| 9.141.3.25 norm() [1/2]               | 956 |
| 9.141.3.26 norm() [2/2]               | 956 |
| 9.141.3.27 operator"!="()             | 957 |
| 9.141.3.28 operator=() [1/2]          | 957 |
| 9.141.3.29 operator=() [2/2]          | 957 |
| 9.141.3.30 operator==(())             | 958 |
| 9.141.3.31 operator[]() [1/2]         | 958 |
| 9.141.3.32 operator[]() [2/2]         | 958 |
| 9.141.3.33 partScale()                | 959 |
| 9.141.3.34 print() [1/4]              | 959 |
| 9.141.3.35 print() [2/4]              | 959 |
| 9.141.3.36 print() [3/4]              | 959 |
| 9.141.3.37 print() [4/4]              | 960 |
| 9.141.3.38 read() [1/2]               | 960 |
| 9.141.3.39 read() [2/2]               | 960 |
| 9.141.3.40 reset() [1/2]              | 961 |

|                                                                      |            |
|----------------------------------------------------------------------|------------|
| 9.141.3.41 reset() [2/2]                                             | 961        |
| 9.141.3.42 resize() [1/2]                                            | 961        |
| 9.141.3.43 resize() [2/2]                                            | 961        |
| 9.141.3.44 scale()                                                   | 962        |
| 9.141.3.45 scatter()                                                 | 962        |
| 9.141.3.46 setConstant()                                             | 962        |
| 9.141.3.47 size()                                                    | 962        |
| 9.141.3.48 sum()                                                     | 963        |
| 9.141.3.49 write() [1/2]                                             | 963        |
| 9.141.3.50 write() [2/2]                                             | 963        |
| 9.141.4 Friends And Related Function Documentation                   | 963        |
| 9.141.4.1 operator* [1/5]                                            | 963        |
| 9.141.4.2 operator* [2/5]                                            | 964        |
| 9.141.4.3 operator* [3/5]                                            | 964        |
| 9.141.4.4 operator* [4/5]                                            | 965        |
| 9.141.4.5 operator* [5/5]                                            | 965        |
| 9.141.4.6 operator+ [1/3]                                            | 965        |
| 9.141.4.7 operator+ [2/3]                                            | 966        |
| 9.141.4.8 operator+ [3/3]                                            | 966        |
| 9.141.4.9 operator- [1/3]                                            | 966        |
| 9.141.4.10 operator- [2/3]                                           | 967        |
| 9.141.4.11 operator- [3/3]                                           | 967        |
| 9.141.4.12 operator/ [1/3]                                           | 968        |
| 9.141.4.13 operator/ [2/3]                                           | 968        |
| 9.141.4.14 operator/ [3/3]                                           | 968        |
| 9.141.4.15 operator^                                                 | 969        |
| <b>10 File Documentation</b>                                         | <b>971</b> |
| 10.1 bindings/Java/include/LinkPredJavaConfig.hpp File Reference     | 971        |
| 10.1.1 Detailed Description                                          | 971        |
| 10.2 bindings/Python/include/LinkPredPythonConfig.hpp File Reference | 971        |
| 10.2.1 Detailed Description                                          | 971        |
| 10.3 include/LinkPredConfig.hpp File Reference                       | 972        |
| 10.3.1 Detailed Description                                          | 972        |
| 10.4 include/linkpred.hpp File Reference                             | 972        |
| 10.4.1 Detailed Description                                          | 973        |
| 10.5 include/linkpred/core/core.hpp File Reference                   | 973        |
| 10.5.1 Detailed Description                                          | 973        |
| 10.6 include/linkpred/core/dnetwork/dnetwork.hpp File Reference      | 974        |
| 10.6.1 Detailed Description                                          | 975        |
| 10.7 include/linkpred/core/ds/bheap.hpp File Reference               | 975        |
| 10.7.1 Detailed Description                                          | 976        |

|                                                                                              |      |
|----------------------------------------------------------------------------------------------|------|
| 10.8 include/linkpred/core/ds/bhmap.hpp File Reference . . . . .                             | 976  |
| 10.8.1 Detailed Description . . . . .                                                        | 977  |
| 10.9 include/linkpred/core/ds/ds.hpp File Reference . . . . .                                | 977  |
| 10.9.1 Detailed Description . . . . .                                                        | 978  |
| 10.10 include/linkpred/core/ds/lmapqueue.hpp File Reference . . . . .                        | 978  |
| 10.10.1 Detailed Description . . . . .                                                       | 979  |
| 10.11 include/linkpred/core/unetwork/unetwork.hpp File Reference . . . . .                   | 979  |
| 10.11.1 Detailed Description . . . . .                                                       | 980  |
| 10.12 include/linkpred/graphalg/encoders/deepwalk/deepwalk.hpp File Reference . . . . .      | 981  |
| 10.12.1 Detailed Description . . . . .                                                       | 982  |
| 10.13 include/linkpred/graphalg/encoders/encoder.hpp File Reference . . . . .                | 983  |
| 10.13.1 Detailed Description . . . . .                                                       | 983  |
| 10.14 include/linkpred/graphalg/encoders/encoders.hpp File Reference . . . . .               | 984  |
| 10.14.1 Detailed Description . . . . .                                                       | 985  |
| 10.15 include/linkpred/graphalg/encoders/hmsm/hmsm.hpp File Reference . . . . .              | 985  |
| 10.15.1 Detailed Description . . . . .                                                       | 986  |
| 10.16 include/linkpred/graphalg/encoders/largevis/largevis.hpp File Reference . . . . .      | 987  |
| 10.16.1 Detailed Description . . . . .                                                       | 988  |
| 10.17 include/linkpred/graphalg/encoders/lem/lem.hpp File Reference . . . . .                | 988  |
| 10.17.1 Detailed Description . . . . .                                                       | 989  |
| 10.18 include/linkpred/graphalg/encoders/line/line.hpp File Reference . . . . .              | 989  |
| 10.18.1 Detailed Description . . . . .                                                       | 991  |
| 10.19 include/linkpred/graphalg/encoders/lle/lle.hpp File Reference . . . . .                | 991  |
| 10.19.1 Detailed Description . . . . .                                                       | 992  |
| 10.20 include/linkpred/graphalg/encoders/matfact/matfact.hpp File Reference . . . . .        | 992  |
| 10.20.1 Detailed Description . . . . .                                                       | 994  |
| 10.21 include/linkpred/graphalg/encoders/matfact/matfactcg.hpp File Reference . . . . .      | 994  |
| 10.21.1 Detailed Description . . . . .                                                       | 995  |
| 10.22 include/linkpred/graphalg/encoders/node2vec/node2vec.hpp File Reference . . . . .      | 996  |
| 10.22.1 Detailed Description . . . . .                                                       | 997  |
| 10.23 include/linkpred/graphalg/graphalg.hpp File Reference . . . . .                        | 997  |
| 10.23.1 Detailed Description . . . . .                                                       | 998  |
| 10.24 include/linkpred/graphalg/shortestpaths/dijkstra.hpp File Reference . . . . .          | 998  |
| 10.24.1 Detailed Description . . . . .                                                       | 999  |
| 10.25 include/linkpred/graphalg/shortestpaths/netdistcalculator.hpp File Reference . . . . . | 999  |
| 10.25.1 Detailed Description . . . . .                                                       | 1001 |
| 10.26 include/linkpred/graphalg/shortestpaths/shortestpaths.hpp File Reference . . . . .     | 1001 |
| 10.26.1 Detailed Description . . . . .                                                       | 1002 |
| 10.27 include/linkpred/graphalg/traversal/graphtraversal.hpp File Reference . . . . .        | 1002 |
| 10.27.1 Detailed Description . . . . .                                                       | 1004 |
| 10.28 include/linkpred/graphalg/traversal/traversal.hpp File Reference . . . . .             | 1004 |
| 10.28.1 Detailed Description . . . . .                                                       | 1004 |

|                                                                                      |      |
|--------------------------------------------------------------------------------------|------|
| 10.29 include/linkpred/instantiations.hpp File Reference                             | 1004 |
| 10.29.1 Detailed Description                                                         | 1005 |
| 10.30 include/linkpred/ml/classifiers/classifier.hpp File Reference                  | 1005 |
| 10.30.1 Detailed Description                                                         | 1007 |
| 10.31 include/linkpred/ml/classifiers/classifiers.hpp File Reference                 | 1007 |
| 10.31.1 Detailed Description                                                         | 1008 |
| 10.32 include/linkpred/ml/classifiers/ffn/ffn.hpp File Reference                     | 1008 |
| 10.32.1 Detailed Description                                                         | 1010 |
| 10.33 include/linkpred/ml/classifiers/linearsvm/linearsvm.hpp File Reference         | 1010 |
| 10.33.1 Detailed Description                                                         | 1012 |
| 10.34 include/linkpred/ml/classifiers/logistic/logisticregressor.hpp File Reference  | 1012 |
| 10.34.1 Detailed Description                                                         | 1015 |
| 10.35 include/linkpred/ml/classifiers/logistic/logregcg.hpp File Reference           | 1015 |
| 10.35.1 Detailed Description                                                         | 1015 |
| 10.36 include/linkpred/ml/classifiers/naivebayes/naivebayes.hpp File Reference       | 1016 |
| 10.36.1 Detailed Description                                                         | 1017 |
| 10.37 include/linkpred/ml/classifiers/rndclassifier/rndclassifier.hpp File Reference | 1017 |
| 10.37.1 Detailed Description                                                         | 1020 |
| 10.38 include/linkpred/ml/ml.hpp File Reference                                      | 1020 |
| 10.38.1 Detailed Description                                                         | 1020 |
| 10.39 include/linkpred/ml/simmeasures/cosinesim.hpp File Reference                   | 1021 |
| 10.39.1 Detailed Description                                                         | 1022 |
| 10.40 include/linkpred/ml/simmeasures/dotprod.hpp File Reference                     | 1023 |
| 10.40.1 Detailed Description                                                         | 1024 |
| 10.41 include/linkpred/ml/simmeasures/l1sim.hpp File Reference                       | 1025 |
| 10.41.1 Detailed Description                                                         | 1026 |
| 10.42 include/linkpred/ml/simmeasures/l2sim.hpp File Reference                       | 1027 |
| 10.42.1 Detailed Description                                                         | 1028 |
| 10.43 include/linkpred/ml/simmeasures/lpsim.hpp File Reference                       | 1029 |
| 10.43.1 Detailed Description                                                         | 1030 |
| 10.44 include/linkpred/ml/simmeasures/pearson.hpp File Reference                     | 1031 |
| 10.44.1 Detailed Description                                                         | 1032 |
| 10.45 include/linkpred/ml/simmeasures/simmeasure.hpp File Reference                  | 1033 |
| 10.45.1 Detailed Description                                                         | 1034 |
| 10.46 include/linkpred/ml/simmeasures/simmeasures.hpp File Reference                 | 1034 |
| 10.46.1 Detailed Description                                                         | 1035 |
| 10.47 include/linkpred/numerical/linear/gfmatrix.hpp File Reference                  | 1035 |
| 10.47.1 Detailed Description                                                         | 1037 |
| 10.48 include/linkpred/numerical/linear/vec.hpp File Reference                       | 1037 |
| 10.48.1 Detailed Description                                                         | 1038 |
| 10.49 include/linkpred/numerical/mds/logmdscg.hpp File Reference                     | 1038 |
| 10.49.1 Detailed Description                                                         | 1039 |

|                                                                                       |      |
|---------------------------------------------------------------------------------------|------|
| 10.50 include/linkpred/numerical/mds/mds.hpp File Reference . . . . .                 | 1039 |
| 10.50.1 Detailed Description . . . . .                                                | 1041 |
| 10.51 include/linkpred/numerical/mf/fastsig.hpp File Reference . . . . .              | 1041 |
| 10.51.1 Detailed Description . . . . .                                                | 1042 |
| 10.52 include/linkpred/numerical/numerical.hpp File Reference . . . . .               | 1043 |
| 10.52.1 Detailed Description . . . . .                                                | 1043 |
| 10.53 include/linkpred/perf/networkmanipulator.hpp File Reference . . . . .           | 1043 |
| 10.53.1 Detailed Description . . . . .                                                | 1046 |
| 10.54 include/linkpred/perf/perf.hpp File Reference . . . . .                         | 1046 |
| 10.54.1 Detailed Description . . . . .                                                | 1047 |
| 10.55 include/linkpred/perf/perfevaluator.hpp File Reference . . . . .                | 1047 |
| 10.55.1 Detailed Description . . . . .                                                | 1049 |
| 10.56 include/linkpred/perf/perfmeasure.hpp File Reference . . . . .                  | 1049 |
| 10.56.1 Detailed Description . . . . .                                                | 1051 |
| 10.56.2 Typedef Documentation . . . . .                                               | 1051 |
| 10.56.2.1 PerfLambdaT . . . . .                                                       | 1051 |
| 10.56.3 Variable Documentation . . . . .                                              | 1051 |
| 10.56.3.1 acc . . . . .                                                               | 1051 |
| 10.56.3.2 fdr . . . . .                                                               | 1052 |
| 10.56.3.3 fmr . . . . .                                                               | 1052 |
| 10.56.3.4 fnr . . . . .                                                               | 1053 |
| 10.56.3.5 fpr . . . . .                                                               | 1053 |
| 10.56.3.6 npv . . . . .                                                               | 1053 |
| 10.56.3.7 pre . . . . .                                                               | 1054 |
| 10.56.3.8 rec . . . . .                                                               | 1054 |
| 10.56.3.9 tnr . . . . .                                                               | 1055 |
| 10.57 include/linkpred/perf/predresults.hpp File Reference . . . . .                  | 1055 |
| 10.57.1 Detailed Description . . . . .                                                | 1057 |
| 10.58 include/linkpred/predictors/directed/dadapredictor.hpp File Reference . . . . . | 1057 |
| 10.58.1 Detailed Description . . . . .                                                | 1058 |
| 10.59 include/linkpred/predictors/directed/dcnepredictor.hpp File Reference . . . . . | 1059 |
| 10.59.1 Detailed Description . . . . .                                                | 1060 |
| 10.60 include/linkpred/predictors/directed/dhdipredictor.hpp File Reference . . . . . | 1060 |
| 10.60.1 Detailed Description . . . . .                                                | 1061 |
| 10.61 include/linkpred/predictors/directed/dhpipredictor.hpp File Reference . . . . . | 1062 |
| 10.61.1 Detailed Description . . . . .                                                | 1063 |
| 10.62 include/linkpred/predictors/directed/directed.hpp File Reference . . . . .      | 1063 |
| 10.62.1 Detailed Description . . . . .                                                | 1064 |
| 10.63 include/linkpred/predictors/directed/djidpredictor.hpp File Reference . . . . . | 1064 |
| 10.63.1 Detailed Description . . . . .                                                | 1065 |
| 10.64 include/linkpred/predictors/directed/dlcppredictor.hpp File Reference . . . . . | 1066 |
| 10.64.1 Detailed Description . . . . .                                                | 1067 |

|                                                                                         |      |
|-----------------------------------------------------------------------------------------|------|
| 10.65 include/linkpred/predictors/directed/dlhnpredictor.hpp File Reference . . . . .   | 1067 |
| 10.65.1 Detailed Description . . . . .                                                  | 1068 |
| 10.66 include/linkpred/predictors/directed/dlpredictor.hpp File Reference . . . . .     | 1069 |
| 10.66.1 Detailed Description . . . . .                                                  | 1069 |
| 10.67 include/linkpred/predictors/directed/dpatpredictor.hpp File Reference . . . . .   | 1070 |
| 10.67.1 Detailed Description . . . . .                                                  | 1071 |
| 10.68 include/linkpred/predictors/directed/dpstpredictor.hpp File Reference . . . . .   | 1071 |
| 10.68.1 Detailed Description . . . . .                                                  | 1072 |
| 10.69 include/linkpred/predictors/directed/dsaipredictor.hpp File Reference . . . . .   | 1073 |
| 10.69.1 Detailed Description . . . . .                                                  | 1074 |
| 10.70 include/linkpred/predictors/directed/dsoipredictor.hpp File Reference . . . . .   | 1074 |
| 10.70.1 Detailed Description . . . . .                                                  | 1075 |
| 10.71 include/linkpred/predictors/predictors.hpp File Reference . . . . .               | 1076 |
| 10.71.1 Detailed Description . . . . .                                                  | 1076 |
| 10.72 include/linkpred/predictors/undirected/uadapredictor.hpp File Reference . . . . . | 1076 |
| 10.72.1 Detailed Description . . . . .                                                  | 1078 |
| 10.73 include/linkpred/predictors/undirected/ucnepredictor.hpp File Reference . . . . . | 1078 |
| 10.73.1 Detailed Description . . . . .                                                  | 1079 |
| 10.74 include/linkpred/predictors/undirected/ucrapredictor.hpp File Reference . . . . . | 1080 |
| 10.74.1 Detailed Description . . . . .                                                  | 1081 |
| 10.75 include/linkpred/predictors/undirected/ucstpredictor.hpp File Reference . . . . . | 1081 |
| 10.75.1 Detailed Description . . . . .                                                  | 1082 |
| 10.76 include/linkpred/predictors/undirected/ueclpredictor.hpp File Reference . . . . . | 1083 |
| 10.76.1 Detailed Description . . . . .                                                  | 1084 |
| 10.77 include/linkpred/predictors/undirected/uesmpredictor.hpp File Reference . . . . . | 1084 |
| 10.77.1 Detailed Description . . . . .                                                  | 1085 |
| 10.78 include/linkpred/predictors/undirected/ufbmpredictor.hpp File Reference . . . . . | 1086 |
| 10.78.1 Detailed Description . . . . .                                                  | 1087 |
| 10.79 include/linkpred/predictors/undirected/uhdipredictor.hpp File Reference . . . . . | 1087 |
| 10.79.1 Detailed Description . . . . .                                                  | 1088 |
| 10.80 include/linkpred/predictors/undirected/uhipredictor.hpp File Reference . . . . .  | 1089 |
| 10.80.1 Detailed Description . . . . .                                                  | 1090 |
| 10.81 include/linkpred/predictors/undirected/uhrgpredictor.hpp File Reference . . . . . | 1090 |
| 10.81.1 Detailed Description . . . . .                                                  | 1091 |
| 10.82 include/linkpred/predictors/undirected/uhyppredictor.hpp File Reference . . . . . | 1092 |
| 10.82.1 Detailed Description . . . . .                                                  | 1094 |
| 10.83 include/linkpred/predictors/undirected/ujidpredictor.hpp File Reference . . . . . | 1094 |
| 10.83.1 Detailed Description . . . . .                                                  | 1095 |
| 10.84 include/linkpred/predictors/undirected/ukabpredictor.hpp File Reference . . . . . | 1096 |
| 10.84.1 Detailed Description . . . . .                                                  | 1097 |
| 10.85 include/linkpred/predictors/undirected/ulcppredictor.hpp File Reference . . . . . | 1098 |
| 10.85.1 Detailed Description . . . . .                                                  | 1099 |

|                                                                                         |      |
|-----------------------------------------------------------------------------------------|------|
| 10.86 include/linkpred/predictors/undirected/ulhnpredictor.hpp File Reference . . . . . | 1099 |
| 10.86.1 Detailed Description . . . . .                                                  | 1100 |
| 10.87 include/linkpred/predictors/undirected/ulpredictor.hpp File Reference . . . . .   | 1101 |
| 10.87.1 Detailed Description . . . . .                                                  | 1101 |
| 10.88 include/linkpred/predictors/undirected/umpspredictor.hpp File Reference . . . . . | 1102 |
| 10.88.1 Detailed Description . . . . .                                                  | 1102 |
| 10.89 include/linkpred/predictors/undirected/undirected.hpp File Reference . . . . .    | 1102 |
| 10.89.1 Detailed Description . . . . .                                                  | 1104 |
| 10.90 include/linkpred/predictors/undirected/unedpredictor.hpp File Reference . . . . . | 1104 |
| 10.90.1 Detailed Description . . . . .                                                  | 1106 |
| 10.91 include/linkpred/predictors/undirected/upatpredictor.hpp File Reference . . . . . | 1106 |
| 10.91.1 Detailed Description . . . . .                                                  | 1107 |
| 10.92 include/linkpred/predictors/undirected/upstpredictor.hpp File Reference . . . . . | 1108 |
| 10.92.1 Detailed Description . . . . .                                                  | 1109 |
| 10.93 include/linkpred/predictors/undirected/uralpredictor.hpp File Reference . . . . . | 1109 |
| 10.93.1 Detailed Description . . . . .                                                  | 1110 |
| 10.94 include/linkpred/predictors/undirected/urndpredictor.hpp File Reference . . . . . | 1111 |
| 10.94.1 Detailed Description . . . . .                                                  | 1112 |
| 10.95 include/linkpred/predictors/undirected/usaipredictor.hpp File Reference . . . . . | 1113 |
| 10.95.1 Detailed Description . . . . .                                                  | 1114 |
| 10.96 include/linkpred/predictors/undirected/usbmpredictor.hpp File Reference . . . . . | 1114 |
| 10.96.1 Detailed Description . . . . .                                                  | 1115 |
| 10.97 include/linkpred/predictors/undirected/ushppredictor.hpp File Reference . . . . . | 1116 |
| 10.97.1 Detailed Description . . . . .                                                  | 1117 |
| 10.98 include/linkpred/predictors/undirected/usoipredictor.hpp File Reference . . . . . | 1118 |
| 10.98.1 Detailed Description . . . . .                                                  | 1119 |
| 10.99 include/linkpred/predictors/undirected/usumpredictor.hpp File Reference . . . . . | 1119 |
| 10.99.1 Detailed Description . . . . .                                                  | 1120 |
| 10.100 include/linkpred/simp/edgescore.hpp File Reference . . . . .                     | 1121 |
| 10.100.1 Detailed Description . . . . .                                                 | 1122 |
| 10.101 include/linkpred/simp/evaluator.hpp File Reference . . . . .                     | 1122 |
| 10.101.1 Detailed Description . . . . .                                                 | 1123 |
| 10.102 include/linkpred/simp/perfres.hpp File Reference . . . . .                       | 1123 |
| 10.102.1 Detailed Description . . . . .                                                 | 1125 |
| 10.103 include/linkpred/simp/predictor.hpp File Reference . . . . .                     | 1125 |
| 10.103.1 Detailed Description . . . . .                                                 | 1126 |
| 10.104 include/linkpred/simp/simp.hpp File Reference . . . . .                          | 1126 |
| 10.104.1 Detailed Description . . . . .                                                 | 1127 |
| 10.105 include/linkpred/utis/log.hpp File Reference . . . . .                           | 1127 |
| 10.105.1 Detailed Description . . . . .                                                 | 1128 |
| 10.105.2 Macro Definition Documentation . . . . .                                       | 1128 |
| 10.105.2.1 logger . . . . .                                                             | 1128 |



---

|                                                                     |             |
|---------------------------------------------------------------------|-------------|
| 10.106 include/linkpred/utls/loglevel.hpp File Reference . . . . .  | 1128        |
| 10.106.1 Detailed Description . . . . .                             | 1129        |
| 10.107 include/linkpred/utls/miscutls.hpp File Reference . . . . .  | 1129        |
| 10.107.1 Detailed Description . . . . .                             | 1132        |
| 10.108 include/linkpred/utls/randomgen.hpp File Reference . . . . . | 1132        |
| 10.108.1 Detailed Description . . . . .                             | 1132        |
| 10.109 include/linkpred/utls/utls.hpp File Reference . . . . .      | 1133        |
| 10.109.1 Detailed Description . . . . .                             | 1133        |
| <b>Index</b>                                                        | <b>1135</b> |



## Chapter 1

# LinkPred: A high performance library for link prediction in complex networks

This is [LinkPred](#), a high performance library for link prediction in complex networks.

[LinkPred](#) provides the following functionalities:

Basic data structures to efficiently store and access network data.

Basic graph algorithms such graph traversal, shortest path algorithms, and graph embedding methods.

Implementation of several topological similarity index predictors, for example: common neighbors, Adamic-Adard index and Jackard index among other predictors (a full list is available in the library documentation).

Implementation of several state-of-the-art global link predictors (a full list is available in the library documentation).

Implementation of several link prediction algorithms based on graph embedding techniques.

Test data generation from ground truth networks.

Performance evaluation functionalities.



## Chapter 2

# Module Index

### 2.1 Modules

Here is a list of all modules:

|                                            |    |
|--------------------------------------------|----|
| Core classes . . . . .                     | 23 |
| Graph algorithms. . . . .                  | 24 |
| Machine learning classes . . . . .         | 25 |
| Numerical classes and algorithms . . . . . | 26 |
| Performance evaluation classes . . . . .   | 27 |
| Link prediction algorithms . . . . .       | 28 |
| Simplified interface . . . . .             | 30 |
| Utility functions and classes . . . . .    | 31 |



## Chapter 3

# Namespace Index

### 3.1 Namespace List

Here is a list of all documented namespaces with brief descriptions:

|                                 |                                                                                                                                          |    |
|---------------------------------|------------------------------------------------------------------------------------------------------------------------------------------|----|
| <a href="#">LinkPred</a>        | Main namespace . . . . .                                                                                                                 | 33 |
| <a href="#">LinkPred::Simp</a>  | Simplified interface. Contains a simplified interface for <a href="#">LinkPred</a> that includes the essential functionalities . . . . . | 47 |
| <a href="#">LinkPred::Utils</a> | Some utility functions . . . . .                                                                                                         | 47 |





## Chapter 4

# Hierarchical Index

### 4.1 Class Hierarchy

This inheritance list is sorted roughly, but not completely, alphabetically:

|                                                                                                                                                                                                                                   |     |
|-----------------------------------------------------------------------------------------------------------------------------------------------------------------------------------------------------------------------------------|-----|
| LinkPred::BHeap< T, P, ComparatorT, ComparatorP > . . . . .                                                                                                                                                                       | 76  |
| LinkPred::Bhmap< K, P, Comparator > . . . . .                                                                                                                                                                                     | 83  |
| LinkPred::Bhmap< Label, NodeID > . . . . .                                                                                                                                                                                        | 83  |
| CGDProblem                                                                                                                                                                                                                        |     |
| LinkPred::LogMDSCG . . . . .                                                                                                                                                                                                      | 401 |
| LinkPred::LogRegCG< InRndIt, OutRndIt > . . . . .                                                                                                                                                                                 | 406 |
| LinkPred::MatFactCG . . . . .                                                                                                                                                                                                     | 423 |
| LinkPred::Classifier< InRndIt, OutRndIt, ScoreRndIt > . . . . .                                                                                                                                                                   | 89  |
| LinkPred::Classifier< typename std::vector< Vec >::iterator, typename std::vector< bool >::iterator, type-<br>name std::vector< double >::iterator > . . . . .                                                                    | 89  |
| LinkPred::LogisticRegressor< InRndIt, OutRndIt, ScoreRndIt > . . . . .                                                                                                                                                            | 396 |
| LinkPred::RndClassifier< InRndIt, OutRndIt, ScoreRndIt > . . . . .                                                                                                                                                                | 632 |
| LinkPred::Collector< Network > . . . . .                                                                                                                                                                                          | 93  |
| LinkPred::Counter< Network > . . . . .                                                                                                                                                                                            | 98  |
| LinkPred::Dijkstra< Network, DistType, NbHopsType > . . . . .                                                                                                                                                                     | 145 |
| LinkPred::Dijkstra< DNetwork<>, double, std::size_t > . . . . .                                                                                                                                                                   | 145 |
| LinkPred::Dijkstra< UNetwork<>, double, std::size_t > . . . . .                                                                                                                                                                   | 145 |
| LinkPred::DLPredictor< NetworkT, EdgeRndItT, ScoreRndItT, EdgeRndOutItT > . . . . .                                                                                                                                               | 174 |
| LinkPred::DLPredictor< DNetwork<>, typename std::vector< typename DNetwork<>::Edge >←<br>::const_iterator, typename std::vector< double >::iterator, typename std::vector< typename D←<br>Network<>::Edge >::iterator > . . . . . | 174 |
| LinkPred::DADAPredictor< Network, EdgeRndIt, ScoreRndIt, EdgeRndOutIt > . . . . .                                                                                                                                                 | 102 |
| LinkPred::DCNEPredictor< Network, EdgeRndIt, ScoreRndIt, EdgeRndOutIt > . . . . .                                                                                                                                                 | 107 |
| LinkPred::DHDIPredictor< Network, EdgeRndIt, ScoreRndIt, EdgeRndOutIt > . . . . .                                                                                                                                                 | 134 |
| LinkPred::DHPIPredictor< Network, EdgeRndIt, ScoreRndIt, EdgeRndOutIt > . . . . .                                                                                                                                                 | 139 |
| LinkPred::DJIDPredictor< Network, EdgeRndIt, ScoreRndIt, EdgeRndOutIt > . . . . .                                                                                                                                                 | 158 |
| LinkPred::DLCPPredictor< Network, EdgeRndIt, ScoreRndIt, EdgeRndOutIt > . . . . .                                                                                                                                                 | 164 |
| LinkPred::DLHNPredictor< Network, EdgeRndIt, ScoreRndIt, EdgeRndOutIt > . . . . .                                                                                                                                                 | 169 |
| LinkPred::DPATPredictor< Network, EdgeRndIt, ScoreRndIt, EdgeRndOutIt > . . . . .                                                                                                                                                 | 215 |
| LinkPred::DPSTPredictor< Network, EdgeRndIt, ScoreRndIt, EdgeRndOutIt > . . . . .                                                                                                                                                 | 220 |
| LinkPred::DSAIPredictor< Network, EdgeRndIt, ScoreRndIt, EdgeRndOutIt > . . . . .                                                                                                                                                 | 226 |
| LinkPred::DSOIPredictor< Network, EdgeRndIt, ScoreRndIt, EdgeRndOutIt > . . . . .                                                                                                                                                 | 231 |
| LinkPred::DNetwork< LabelT, NodeIDT, EdgeT > . . . . .                                                                                                                                                                            | 182 |
| LinkPred::DNetwork<> . . . . .                                                                                                                                                                                                    | 182 |
| LinkPred::Simp::Evaluator::Factory::ECLParams . . . . .                                                                                                                                                                           | 237 |

|                                                                                            |     |
|--------------------------------------------------------------------------------------------|-----|
| LinkPred::UNetwork< LabelT, NodeIDT, EdgeT >::EdgeMap< ValueType > . . . . .               | 238 |
| LinkPred::DNetwork< LabelT, NodeIDT, EdgeT >::EdgeMap< ValueType > . . . . .               | 244 |
| LinkPred::Utils::EdgeScore< Label > . . . . .                                              | 251 |
| LinkPred::Simp::EdgeScore . . . . .                                                        | 252 |
| LinkPred::Simp::EdgeScoreByID . . . . .                                                    | 253 |
| LinkPred::Encoder< Network > . . . . .                                                     | 254 |
| LinkPred::Encoder< UNetwork<> > . . . . .                                                  | 254 |
| LinkPred::DeepWalk< Network > . . . . .                                                    | 113 |
| LinkPred::HMSM< Network > . . . . .                                                        | 351 |
| LinkPred::LargeVis< Network > . . . . .                                                    | 367 |
| LinkPred::LINE< Network > . . . . .                                                        | 377 |
| LinkPred::MatFact< Network > . . . . .                                                     | 416 |
| LinkPred::Node2Vec< Network > . . . . .                                                    | 464 |
| LinkPred::Simp::Evaluator::Factory::ESMParams . . . . .                                    | 261 |
| LinkPred::Simp::Evaluator . . . . .                                                        | 310 |
| LinkPred::FastSig< T > . . . . .                                                           | 321 |
| LinkPred::FastSig< float > . . . . .                                                       | 321 |
| LinkPred::Simp::Evaluator::Factory::FBMParams . . . . .                                    | 324 |
| LinkPred::GFMatrix . . . . .                                                               | 332 |
| LinkPred::GraphTraversal< Network, NodeProcessor > . . . . .                               | 348 |
| LinkPred::GraphTraversal< UNetwork<>, Collector< UNetwork<> > > . . . . .                  | 348 |
| LinkPred::BFS< Network, NodeProcessor > . . . . .                                          | 73  |
| LinkPred::DFS< Network, NodeProcessor > . . . . .                                          | 130 |
| LinkPred::Simp::Evaluator::Factory::HRGParams . . . . .                                    | 358 |
| LinkPred::Simp::Evaluator::Factory::HYPPParams . . . . .                                   | 359 |
| iterator                                                                                   |     |
| LinkPred::DNetwork< LabelT, NodeIDT, EdgeT >::NodeDegIt . . . . .                          | 474 |
| LinkPred::DNetwork< LabelT, NodeIDT, EdgeT >::NonEdgeIt . . . . .                          | 526 |
| LinkPred::DNetwork< LabelT, NodeIDT, EdgeT >::RndEdgeIt . . . . .                          | 641 |
| LinkPred::DNetwork< LabelT, NodeIDT, EdgeT >::RndNodeIt . . . . .                          | 646 |
| LinkPred::DNetwork< LabelT, NodeIDT, EdgeT >::RndNonEdgeIt . . . . .                       | 661 |
| LinkPred::PredResults< TestDataT, LPredictorT, ScoresContainerT >::ScoreIterator . . . . . | 678 |
| LinkPred::TestData< Network, EdgeContT >::TestEdgeIt . . . . .                             | 709 |
| LinkPred::TestEdgeGen< Network, EdgeContT >::TNEdgeIt . . . . .                            | 719 |
| LinkPred::TestEdgeGen< Network, EdgeContT >::TPEdgeIt . . . . .                            | 729 |
| LinkPred::UNetwork< LabelT, NodeIDT, EdgeT >::NodeDegIt . . . . .                          | 484 |
| LinkPred::UNetwork< LabelT, NodeIDT, EdgeT >::NonEdgeIt . . . . .                          | 517 |
| LinkPred::UNetwork< LabelT, NodeIDT, EdgeT >::RndEdgeIt . . . . .                          | 636 |
| LinkPred::UNetwork< LabelT, NodeIDT, EdgeT >::RndNodeIt . . . . .                          | 651 |
| LinkPred::UNetwork< LabelT, NodeIDT, EdgeT >::RndNonEdgeIt . . . . .                       | 656 |
| LinkPred::Simp::Evaluator::Factory::KABParams . . . . .                                    | 360 |
| LinkPred::Simp::Evaluator::Factory::LCPPParams . . . . .                                   | 376 |
| LinkPred::LMapQueue< K, P, KComparator, PComparator > . . . . .                            | 384 |
| LinkPred::Log . . . . .                                                                    | 393 |
| LinkPred::MatFactPbData . . . . .                                                          | 427 |
| LinkPred::MDS . . . . .                                                                    | 428 |
| LinkPred::NetDistCalculator< Network, DistType, NbHopsType > . . . . .                     | 433 |
| LinkPred::NetDistCalculator< DNetwork<>, double, std::size_t > . . . . .                   | 433 |
| LinkPred::DESPLDistCalculator< Network, DistType, NbHopsType > . . . . .                   | 121 |
| LinkPred::NetDistCalculator< UNetwork<>, double, std::size_t > . . . . .                   | 433 |
| LinkPred::ESPLDistCalculator< UNetwork<>, double, std::size_t > . . . . .                  | 284 |
| LinkPred::ASPDistCalculator< Network, DistType, NbHopsType > . . . . .                     | 59  |
| LinkPred::ASPDsimCalculator< Network, DsimType, NbHopsType > . . . . .                     | 66  |
| LinkPred::ESPDistCalculator< Network, DistType, NbHopsType > . . . . .                     | 262 |
| LinkPred::ESPDsimCalculator< Network, DsimType, NbHopsType > . . . . .                     | 270 |
| LinkPred::ESPLDistCalculator< Network, DistType, NbHopsType > . . . . .                    | 284 |
| LinkPred::NetIndSimlCalculator< Network, DistType, NbHopsType > . . . . .                  | 438 |

|                                                                                                                                                                                                                                   |     |
|-----------------------------------------------------------------------------------------------------------------------------------------------------------------------------------------------------------------------------------|-----|
| LinkPred::NetIndSimlCalculator< UNetwork<>, double, std::size_t > . . . . .                                                                                                                                                       | 438 |
| LinkPred::ESPLIndSimlCalculator< Network, DistType, NbHopsType > . . . . .                                                                                                                                                        | 277 |
| LinkPred::NetSimlCalculator< Network, DistType, NbHopsType > . . . . .                                                                                                                                                            | 443 |
| LinkPred::NetSimlCalculator< UNetwork<>, double, std::size_t > . . . . .                                                                                                                                                          | 443 |
| LinkPred::ESPLSimlCalculator< Network, DistType, NbHopsType > . . . . .                                                                                                                                                           | 293 |
| LinkPred::ESPSimlCalculator< Network, DistType, NbHopsType > . . . . .                                                                                                                                                            | 302 |
| LinkPred::NetworkManipulator< Network > . . . . .                                                                                                                                                                                 | 450 |
| LinkPred::UNetwork< LabelT, NodeIDT, EdgeT >::NodeMap< ValueType > . . . . .                                                                                                                                                      | 494 |
| LinkPred::DNetwork< LabelT, NodeIDT, EdgeT >::NodeMap< ValueType > . . . . .                                                                                                                                                      | 499 |
| LinkPred::DNetwork< LabelT, NodeIDT, EdgeT >::NodeSMap< ValueType > . . . . .                                                                                                                                                     | 505 |
| LinkPred::UNetwork< LabelT, NodeIDT, EdgeT >::NodeSMap< ValueType > . . . . .                                                                                                                                                     | 510 |
| LinkPred::Utils::PairCompRight< FirstT, SecondT, CompareT > . . . . .                                                                                                                                                             | 536 |
| LinkPred::PEFactory< Network, LPredictorT, TestDataT, PerfMeasureT > . . . . .                                                                                                                                                    | 540 |
| LinkPred::PEFactory<> . . . . .                                                                                                                                                                                                   | 540 |
| LinkPred::PerfEvalExpDescp< Network > . . . . .                                                                                                                                                                                   | 547 |
| LinkPred::PerfEvalExpDescp< UNetwork<> > . . . . .                                                                                                                                                                                | 547 |
| LinkPred::PerfEvalExp< Network, TestDataT, LPredictorT, PredResultsT, PerfMeasureT > . . . . .                                                                                                                                    | 549 |
| LinkPred::PerfEvaluator< TestDataT, LPredictorT, PredResultsT, PerfMeasureT > . . . . .                                                                                                                                           | 555 |
| LinkPred::PerfMeasure< PredResultsT > . . . . .                                                                                                                                                                                   | 562 |
| LinkPred::PerfMeasure< PredResults<> > . . . . .                                                                                                                                                                                  | 562 |
| LinkPred::PerfCurve< PredResultsT > . . . . .                                                                                                                                                                                     | 541 |
| LinkPred::TPR< PredResultsT > . . . . .                                                                                                                                                                                           | 738 |
| LinkPred::PerfCurve< PredResults<> > . . . . .                                                                                                                                                                                    | 541 |
| LinkPred::GCurve< PredResultsT > . . . . .                                                                                                                                                                                        | 325 |
| LinkPred::PR< PredResultsT > . . . . .                                                                                                                                                                                            | 569 |
| LinkPred::ROC< PredResultsT > . . . . .                                                                                                                                                                                           | 667 |
| LinkPred::Simp::PerfRes . . . . .                                                                                                                                                                                                 | 568 |
| LinkPred::Simp::Predictor . . . . .                                                                                                                                                                                               | 578 |
| LinkPred::PredResults< TestDataT, LPredictorT, ScoresContainerT > . . . . .                                                                                                                                                       | 614 |
| LinkPred::Simp::Evaluator::Factory::PSTParams . . . . .                                                                                                                                                                           | 626 |
| LinkPred::RandomGen . . . . .                                                                                                                                                                                                     | 627 |
| LinkPred::Simp::Evaluator::Factory::RNDParams . . . . .                                                                                                                                                                           | 666 |
| LinkPred::Simp::Evaluator::Factory::SBMPParams . . . . .                                                                                                                                                                          | 677 |
| LinkPred::Simp::Evaluator::Factory::SHPPParams . . . . .                                                                                                                                                                          | 689 |
| LinkPred::SimMeasure . . . . .                                                                                                                                                                                                    | 690 |
| LinkPred::CosineSim . . . . .                                                                                                                                                                                                     | 95  |
| LinkPred::DotProd . . . . .                                                                                                                                                                                                       | 212 |
| LinkPred::L1Sim . . . . .                                                                                                                                                                                                         | 361 |
| LinkPred::L2Sim . . . . .                                                                                                                                                                                                         | 364 |
| LinkPred::LPSim . . . . .                                                                                                                                                                                                         | 412 |
| LinkPred::Pearson . . . . .                                                                                                                                                                                                       | 537 |
| LinkPred::TestData< Network, EdgeContT > . . . . .                                                                                                                                                                                | 693 |
| LinkPred::TestData<> . . . . .                                                                                                                                                                                                    | 693 |
| LinkPred::TestEdgeGen< Network, EdgeContT > . . . . .                                                                                                                                                                             | 704 |
| LinkPred::ULPredictor< NetworkT, EdgeRndItT, ScoreRndItT, EdgeRndOutItT > . . . . .                                                                                                                                               | 835 |
| LinkPred::ULPredictor< Network, EdgeRndIt, ScoreRndIt, EdgeRndOutIt > . . . . .                                                                                                                                                   | 835 |
| LinkPred::ULPredictor< UNetwork<>, typename std::vector< typename UNetwork<>::Edge >←<br>::const_iterator, typename std::vector< double >::iterator, typename std::vector< typename U←<br>Network<>::Edge >::iterator > . . . . . | 835 |
| LinkPred::UADAPredictor< Network, EdgeRndIt, ScoreRndIt, EdgeRndOutIt > . . . . .                                                                                                                                                 | 745 |
| LinkPred::UCNEPredictor< Network, EdgeRndIt, ScoreRndIt, EdgeRndOutIt > . . . . .                                                                                                                                                 | 751 |
| LinkPred::UCRAPredictor< Network, EdgeRndIt, ScoreRndIt, EdgeRndOutIt > . . . . .                                                                                                                                                 | 756 |
| LinkPred::UCSTPredictor< Network, EdgeRndIt, ScoreRndIt, EdgeRndOutIt > . . . . .                                                                                                                                                 | 762 |
| LinkPred::UECLPredictor< Network, EdgeRndIt, ScoreRndIt, EdgeRndOutIt > . . . . .                                                                                                                                                 | 768 |
| LinkPred::UESMPredictor< Network, EdgeRndIt, ScoreRndIt, EdgeRndOutIt > . . . . .                                                                                                                                                 | 775 |
| LinkPred::UFBMPredictor< Network, EdgeRndIt, ScoreRndIt, EdgeRndOutIt > . . . . .                                                                                                                                                 | 781 |
| LinkPred::UHDIPredictor< Network, EdgeRndIt, ScoreRndIt, EdgeRndOutIt > . . . . .                                                                                                                                                 | 786 |

|                                                                                   |     |
|-----------------------------------------------------------------------------------|-----|
| LinkPred::UHPIPredictor< Network, EdgeRndIt, ScoreRndIt, EdgeRndOutIt > . . . . . | 792 |
| LinkPred::UHRGPredictor< Network, EdgeRndIt, ScoreRndIt, EdgeRndOutIt > . . . . . | 797 |
| LinkPred::UHYPPredictor< Network, EdgeRndIt, ScoreRndIt, EdgeRndOutIt > . . . . . | 803 |
| LinkPred::UJIDPredictor< Network, EdgeRndIt, ScoreRndIt, EdgeRndOutIt > . . . . . | 811 |
| LinkPred::UKABPredictor< Network, EdgeRndIt, ScoreRndIt, EdgeRndOutIt > . . . . . | 817 |
| LinkPred::ULCPPredictor< Network, EdgeRndIt, ScoreRndIt, EdgeRndOutIt > . . . . . | 824 |
| LinkPred::ULHNPredictor< Network, EdgeRndIt, ScoreRndIt, EdgeRndOutIt > . . . . . | 829 |
| LinkPred::UMSPredictor< Network, EdgeRndIt, ScoreRndIt, EdgeRndOutIt > . . . . .  | 843 |
| LinkPred::UNEDPredictor< Network, EdgeRndIt, ScoreRndIt, EdgeRndOutIt > . . . . . | 861 |
| LinkPred::UPATPredictor< Network, EdgeRndIt, ScoreRndIt, EdgeRndOutIt > . . . . . | 895 |
| LinkPred::UPSTPredictor< Network, EdgeRndIt, ScoreRndIt, EdgeRndOutIt > . . . . . | 900 |
| LinkPred::URALPredictor< Network, EdgeRndIt, ScoreRndIt, EdgeRndOutIt > . . . . . | 905 |
| LinkPred::URNDPredictor< Network, EdgeRndIt, ScoreRndIt, EdgeRndOutIt > . . . . . | 911 |
| LinkPred::USAIPredictor< Network, EdgeRndIt, ScoreRndIt, EdgeRndOutIt > . . . . . | 915 |
| LinkPred::USBMPredictor< Network, EdgeRndIt, ScoreRndIt, EdgeRndOutIt > . . . . . | 922 |
| LinkPred::USHPPredictor< Network, EdgeRndIt, ScoreRndIt, EdgeRndOutIt > . . . . . | 927 |
| LinkPred::USOIPredictor< Network, EdgeRndIt, ScoreRndIt, EdgeRndOutIt > . . . . . | 935 |
| LinkPred::USUMPredictor< Network, EdgeRndIt, ScoreRndIt, EdgeRndOutIt > . . . . . | 941 |
| LinkPred::UNetwork< LabelT, NodeIDT, EdgeT > . . . . .                            | 867 |
| LinkPred::UNetwork<> . . . . .                                                    | 867 |
| LinkPred::Vec . . . . .                                                           | 946 |

## Chapter 5

# Class Index

### 5.1 Class List

Here are the classes, structs, unions and interfaces with brief descriptions:

|                                                                                                                                                                                                                                                                                                                                                                                                                                                                                  |     |
|----------------------------------------------------------------------------------------------------------------------------------------------------------------------------------------------------------------------------------------------------------------------------------------------------------------------------------------------------------------------------------------------------------------------------------------------------------------------------------|-----|
| <a href="#">LinkPred::ASPDistCalculator&lt; Network, DistType, NbHopsType &gt;</a>                                                                                                                                                                                                                                                                                                                                                                                               |     |
| Approximate shortest path distance calculator . . . . .                                                                                                                                                                                                                                                                                                                                                                                                                          | 59  |
| <a href="#">LinkPred::ASPDsimCalculator&lt; Network, DsimType, NbHopsType &gt;</a>                                                                                                                                                                                                                                                                                                                                                                                               |     |
| Approximate shortest path dissimilarity calculator . . . . .                                                                                                                                                                                                                                                                                                                                                                                                                     | 66  |
| <a href="#">LinkPred::BFS&lt; Network, NodeProcessor &gt;</a>                                                                                                                                                                                                                                                                                                                                                                                                                    |     |
| BFS graph traversal . . . . .                                                                                                                                                                                                                                                                                                                                                                                                                                                    | 73  |
| <a href="#">LinkPred::BHeap&lt; T, P, ComparatorT, ComparatorP &gt;</a>                                                                                                                                                                                                                                                                                                                                                                                                          |     |
| A binary heap . . . . .                                                                                                                                                                                                                                                                                                                                                                                                                                                          | 76  |
| <a href="#">LinkPred::Bhmap&lt; K, P, Comparator &gt;</a>                                                                                                                                                                                                                                                                                                                                                                                                                        |     |
| A bidirectional half map . . . . .                                                                                                                                                                                                                                                                                                                                                                                                                                               | 83  |
| <a href="#">LinkPred::Classifier&lt; InRndIt, OutRndIt, ScoreRndIt &gt;</a>                                                                                                                                                                                                                                                                                                                                                                                                      |     |
| Interface of a binary classifier . . . . .                                                                                                                                                                                                                                                                                                                                                                                                                                       | 89  |
| <a href="#">LinkPred::Collector&lt; Network &gt;</a>                                                                                                                                                                                                                                                                                                                                                                                                                             |     |
| A class that collects nodes during traversal . . . . .                                                                                                                                                                                                                                                                                                                                                                                                                           | 93  |
| <a href="#">LinkPred::CosineSim</a>                                                                                                                                                                                                                                                                                                                                                                                                                                              |     |
| Cosine similarity . . . . .                                                                                                                                                                                                                                                                                                                                                                                                                                                      | 95  |
| <a href="#">LinkPred::Counter&lt; Network &gt;</a>                                                                                                                                                                                                                                                                                                                                                                                                                               |     |
| A class that counts nodes during traversal . . . . .                                                                                                                                                                                                                                                                                                                                                                                                                             | 98  |
| <a href="#">LinkPred::DADAPredictor&lt; Network, EdgeRndIt, ScoreRndIt, EdgeRndOutIt &gt;</a>                                                                                                                                                                                                                                                                                                                                                                                    |     |
| Common neighbor link predictor adapted to directed networks . . . . .                                                                                                                                                                                                                                                                                                                                                                                                            | 102 |
| <a href="#">LinkPred::DCNEPredictor&lt; Network, EdgeRndIt, ScoreRndIt, EdgeRndOutIt &gt;</a>                                                                                                                                                                                                                                                                                                                                                                                    |     |
| Common neighbor link predictor adapted to directed networks . . . . .                                                                                                                                                                                                                                                                                                                                                                                                            | 107 |
| <a href="#">LinkPred::DeepWalk&lt; Network &gt;</a>                                                                                                                                                                                                                                                                                                                                                                                                                              |     |
| <a href="#">DeepWalk</a> encoder. Reference: Perozzi, B., Al-Rfou, R., and Skiena, S. (2014). Deepwalk: Online learning of social representations. In Proceedings of the 20th ACM SIGKDD International Conference on Knowledge Discovery and Data Mining, KDD '14, pages 701–710, New York, NY, USA. Association for Computing Machinery. This implementation is based on the code <a href="https://github.com/xgfs/deepwalk-c">https://github.com/xgfs/deepwalk-c</a> . . . . . | 113 |
| <a href="#">LinkPred::DESPLDistCalculator&lt; Network, DistType, NbHopsType &gt;</a>                                                                                                                                                                                                                                                                                                                                                                                             |     |
| Exact shortest path distance calculator on a directed network with limits on the number of hops . . . . .                                                                                                                                                                                                                                                                                                                                                                        | 121 |
| <a href="#">LinkPred::DFS&lt; Network, NodeProcessor &gt;</a>                                                                                                                                                                                                                                                                                                                                                                                                                    |     |
| DFS graph traversal . . . . .                                                                                                                                                                                                                                                                                                                                                                                                                                                    | 130 |
| <a href="#">LinkPred::DHDIPredictor&lt; Network, EdgeRndIt, ScoreRndIt, EdgeRndOutIt &gt;</a>                                                                                                                                                                                                                                                                                                                                                                                    |     |
| Common neighbor link predictor adapted to directed networks . . . . .                                                                                                                                                                                                                                                                                                                                                                                                            | 134 |
| <a href="#">LinkPred::DHPIPredictor&lt; Network, EdgeRndIt, ScoreRndIt, EdgeRndOutIt &gt;</a>                                                                                                                                                                                                                                                                                                                                                                                    |     |
| Common neighbor link predictor adapted to directed networks . . . . .                                                                                                                                                                                                                                                                                                                                                                                                            | 139 |

|                                                                                                                                                                                                                                                                                                                                                        |     |
|--------------------------------------------------------------------------------------------------------------------------------------------------------------------------------------------------------------------------------------------------------------------------------------------------------------------------------------------------------|-----|
| <a href="#">LinkPred::Dijkstra&lt; Network, DistType, NbHopsType &gt;</a>                                                                                                                                                                                                                                                                              |     |
| An implementation of <a href="#">Dijkstra's</a> algorithm                                                                                                                                                                                                                                                                                              | 145 |
| <a href="#">LinkPred::DJIDPredictor&lt; Network, EdgeRndIt, ScoreRndIt, EdgeRndOutIt &gt;</a>                                                                                                                                                                                                                                                          |     |
| Common neighbor link predictor adapted to directed networks                                                                                                                                                                                                                                                                                            | 158 |
| <a href="#">LinkPred::DLCPredictor&lt; Network, EdgeRndIt, ScoreRndIt, EdgeRndOutIt &gt;</a>                                                                                                                                                                                                                                                           |     |
| Common neighbor link predictor adapted to directed networks                                                                                                                                                                                                                                                                                            | 164 |
| <a href="#">LinkPred::DLHNPredictor&lt; Network, EdgeRndIt, ScoreRndIt, EdgeRndOutIt &gt;</a>                                                                                                                                                                                                                                                          |     |
| Common neighbor link predictor adapted to directed networks                                                                                                                                                                                                                                                                                            | 169 |
| <a href="#">LinkPred::DLPredictor&lt; NetworkT, EdgeRndItT, ScoreRndItT, EdgeRndOutItT &gt;</a>                                                                                                                                                                                                                                                        |     |
| The interface of a link predictor in a directed network                                                                                                                                                                                                                                                                                                | 174 |
| <a href="#">LinkPred::DNetwork&lt; LabelT, NodeIDT, EdgeT &gt;</a>                                                                                                                                                                                                                                                                                     |     |
| This class represents a directed network in the sense of graph theory                                                                                                                                                                                                                                                                                  | 182 |
| <a href="#">LinkPred::DotProd</a>                                                                                                                                                                                                                                                                                                                      |     |
| A simple dot product similarity measure                                                                                                                                                                                                                                                                                                                | 212 |
| <a href="#">LinkPred::DPATPredictor&lt; Network, EdgeRndIt, ScoreRndIt, EdgeRndOutIt &gt;</a>                                                                                                                                                                                                                                                          |     |
| Common neighbor link predictor adapted to directed networks                                                                                                                                                                                                                                                                                            | 215 |
| <a href="#">LinkPred::DPSTPredictor&lt; Network, EdgeRndIt, ScoreRndIt, EdgeRndOutIt &gt;</a>                                                                                                                                                                                                                                                          |     |
| A link predictor that prestores edge scores. This allows to seemingly integrate results from external link prediction algorithms to <a href="#">LinkPred</a> (for example, users may implement their own link prediction algorithm and then use this link predictor to use compare their results to algorithms available in <a href="#">LinkPred</a> ) | 220 |
| <a href="#">LinkPred::DSAIPredictor&lt; Network, EdgeRndIt, ScoreRndIt, EdgeRndOutIt &gt;</a>                                                                                                                                                                                                                                                          |     |
| Common neighbor link predictor adapted to directed networks                                                                                                                                                                                                                                                                                            | 226 |
| <a href="#">LinkPred::DSOIPredictor&lt; Network, EdgeRndIt, ScoreRndIt, EdgeRndOutIt &gt;</a>                                                                                                                                                                                                                                                          |     |
| Common neighbor link predictor adapted to directed networks                                                                                                                                                                                                                                                                                            | 231 |
| <a href="#">LinkPred::Simp::Evaluator::Factory::ECLParams</a>                                                                                                                                                                                                                                                                                          |     |
| Parameters of ECL                                                                                                                                                                                                                                                                                                                                      | 237 |
| <a href="#">LinkPred::UNetwork&lt; LabelT, NodeIDT, EdgeT &gt;::EdgeMap&lt; ValueType &gt;</a>                                                                                                                                                                                                                                                         |     |
| An edge map                                                                                                                                                                                                                                                                                                                                            | 238 |
| <a href="#">LinkPred::DNetwork&lt; LabelT, NodeIDT, EdgeT &gt;::EdgeMap&lt; ValueType &gt;</a>                                                                                                                                                                                                                                                         |     |
| An edge map                                                                                                                                                                                                                                                                                                                                            | 244 |
| <a href="#">LinkPred::Utils::EdgeScore&lt; Label &gt;</a>                                                                                                                                                                                                                                                                                              |     |
| A structure to store the score of an edge                                                                                                                                                                                                                                                                                                              | 251 |
| <a href="#">LinkPred::Simp::EdgeScore</a>                                                                                                                                                                                                                                                                                                              |     |
| A structure to store the score of an edge                                                                                                                                                                                                                                                                                                              | 252 |
| <a href="#">LinkPred::Simp::EdgeScoreByID</a>                                                                                                                                                                                                                                                                                                          |     |
| A structure to store the score of an edge. The node IDs are used instead of labels                                                                                                                                                                                                                                                                     | 253 |
| <a href="#">LinkPred::Encoder&lt; Network &gt;</a>                                                                                                                                                                                                                                                                                                     |     |
| The interface of a network encoder                                                                                                                                                                                                                                                                                                                     | 254 |
| <a href="#">LinkPred::Simp::Evaluator::Factory::ESMParams</a>                                                                                                                                                                                                                                                                                          |     |
| Parameters of ESM                                                                                                                                                                                                                                                                                                                                      | 261 |
| <a href="#">LinkPred::ESPDistCalculator&lt; Network, DistType, NbHopsType &gt;</a>                                                                                                                                                                                                                                                                     |     |
| Exact shortest path distance calculator                                                                                                                                                                                                                                                                                                                | 262 |
| <a href="#">LinkPred::ESPDisimCalculator&lt; Network, DsimType, NbHopsType &gt;</a>                                                                                                                                                                                                                                                                    |     |
| Exact shortest path dissimilarity calculator                                                                                                                                                                                                                                                                                                           | 270 |
| <a href="#">LinkPred::ESPIndSimCalculator&lt; Network, DistType, NbHopsType &gt;</a>                                                                                                                                                                                                                                                                   |     |
| Exact shortest path distance calculator                                                                                                                                                                                                                                                                                                                | 277 |
| <a href="#">LinkPred::ESPLDistCalculator&lt; Network, DistType, NbHopsType &gt;</a>                                                                                                                                                                                                                                                                    |     |
| Exact shortest path distance calculator with limits on the number of hops                                                                                                                                                                                                                                                                              | 284 |
| <a href="#">LinkPred::ESPLSimCalculator&lt; Network, DistType, NbHopsType &gt;</a>                                                                                                                                                                                                                                                                     |     |
| Exact shortest path distance calculator                                                                                                                                                                                                                                                                                                                | 293 |
| <a href="#">LinkPred::ESPSimCalculator&lt; Network, DistType, NbHopsType &gt;</a>                                                                                                                                                                                                                                                                      |     |
| Exact shortest path distance calculator                                                                                                                                                                                                                                                                                                                | 302 |
| <a href="#">LinkPred::Simp::Evaluator</a>                                                                                                                                                                                                                                                                                                              |     |
| A class that simplifies the evaluation of link prediction algorithms                                                                                                                                                                                                                                                                                   | 310 |
| <a href="#">LinkPred::FastSig&lt; T &gt;</a>                                                                                                                                                                                                                                                                                                           |     |
| A fast sigmoid                                                                                                                                                                                                                                                                                                                                         | 321 |

|                                                                                                                                                                                                                                                                                                                                                                                                                                                                                                                                            |     |
|--------------------------------------------------------------------------------------------------------------------------------------------------------------------------------------------------------------------------------------------------------------------------------------------------------------------------------------------------------------------------------------------------------------------------------------------------------------------------------------------------------------------------------------------|-----|
| <a href="#">LinkPred::Simp::Evaluator::Factory::FBMParams</a>                                                                                                                                                                                                                                                                                                                                                                                                                                                                              |     |
| Parameters of FBM                                                                                                                                                                                                                                                                                                                                                                                                                                                                                                                          | 324 |
| <a href="#">LinkPred::GCurve&lt; PredResultsT &gt;</a>                                                                                                                                                                                                                                                                                                                                                                                                                                                                                     |     |
| General performance curve                                                                                                                                                                                                                                                                                                                                                                                                                                                                                                                  | 325 |
| <a href="#">LinkPred::GFMatrix</a>                                                                                                                                                                                                                                                                                                                                                                                                                                                                                                         |     |
| Generalized full matrix. The storage scheme used is column-major                                                                                                                                                                                                                                                                                                                                                                                                                                                                           | 332 |
| <a href="#">LinkPred::GraphTraversal&lt; Network, NodeProcessor &gt;</a>                                                                                                                                                                                                                                                                                                                                                                                                                                                                   |     |
| Graph traversal interface                                                                                                                                                                                                                                                                                                                                                                                                                                                                                                                  | 348 |
| <a href="#">LinkPred::HMSM&lt; Network &gt;</a>                                                                                                                                                                                                                                                                                                                                                                                                                                                                                            |     |
| Contains the implementation of an algorithm for embedding a network using a hidden metric space model. Reference: R. Alharbi, H. Benhidour, and S. Kerrache. "Link Prediction in Complex Networks Based on a Hidden Variables Model". In: 2016 UKSim-AMSS 18th International Conference on Computer Modelling and Simulation (UKSim). 2016, pages 119–124                                                                                                                                                                                  | 351 |
| <a href="#">LinkPred::Simp::Evaluator::Factory::HRGParams</a>                                                                                                                                                                                                                                                                                                                                                                                                                                                                              |     |
| Parameters of HRG                                                                                                                                                                                                                                                                                                                                                                                                                                                                                                                          | 358 |
| <a href="#">LinkPred::Simp::Evaluator::Factory::HYPPParams</a>                                                                                                                                                                                                                                                                                                                                                                                                                                                                             |     |
| Parameters of HYP                                                                                                                                                                                                                                                                                                                                                                                                                                                                                                                          | 359 |
| <a href="#">LinkPred::Simp::Evaluator::Factory::KABParams</a>                                                                                                                                                                                                                                                                                                                                                                                                                                                                              |     |
| Parameters of KAB                                                                                                                                                                                                                                                                                                                                                                                                                                                                                                                          | 360 |
| <a href="#">LinkPred::L1Sim</a>                                                                                                                                                                                                                                                                                                                                                                                                                                                                                                            |     |
| L1 similarity (negative the L1 norm or Manhattan distance)                                                                                                                                                                                                                                                                                                                                                                                                                                                                                 | 361 |
| <a href="#">LinkPred::L2Sim</a>                                                                                                                                                                                                                                                                                                                                                                                                                                                                                                            |     |
| L2 similarity (negative the Euclidean distance)                                                                                                                                                                                                                                                                                                                                                                                                                                                                                            | 364 |
| <a href="#">LinkPred::LargeVis&lt; Network &gt;</a>                                                                                                                                                                                                                                                                                                                                                                                                                                                                                        |     |
| <a href="#">LargeVis</a> encoder. Reference: Tang, J., Liu, J., Zhang, M., and Mei, Q. (2016b). Visualizing large-scale and high-dimensional data. In Bourdeau, J., Hendler, J., Nkambou, R., Horrocks, I., and Zhao, B. Y., editors, WWW, pages 287–297. ACM. This implementation is based on the code <a href="https://github.com/lferry007/LargeVis">https://github.com/lferry007/LargeVis</a>                                                                                                                                          | 367 |
| <a href="#">LinkPred::Simp::Evaluator::Factory::LCPParams</a>                                                                                                                                                                                                                                                                                                                                                                                                                                                                              |     |
| Parameters of LCP                                                                                                                                                                                                                                                                                                                                                                                                                                                                                                                          | 376 |
| <a href="#">LinkPred::LINE&lt; Network &gt;</a>                                                                                                                                                                                                                                                                                                                                                                                                                                                                                            |     |
| <a href="#">LINE</a> encoder                                                                                                                                                                                                                                                                                                                                                                                                                                                                                                               | 377 |
| <a href="#">LinkPred::LMapQueue&lt; K, P, KComparator, PComparator &gt;</a>                                                                                                                                                                                                                                                                                                                                                                                                                                                                |     |
| A map-priority queue with limit on the capacity                                                                                                                                                                                                                                                                                                                                                                                                                                                                                            | 384 |
| <a href="#">LinkPred::Log</a>                                                                                                                                                                                                                                                                                                                                                                                                                                                                                                              |     |
| A log class                                                                                                                                                                                                                                                                                                                                                                                                                                                                                                                                | 393 |
| <a href="#">LinkPred::LogisticRegresser&lt; InRndIt, OutRndIt, ScoreRndIt &gt;</a>                                                                                                                                                                                                                                                                                                                                                                                                                                                         |     |
| Logistic regression algorithm                                                                                                                                                                                                                                                                                                                                                                                                                                                                                                              | 396 |
| <a href="#">LinkPred::LogMDSCG</a>                                                                                                                                                                                                                                                                                                                                                                                                                                                                                                         |     |
| Optimization problem associated with multidimensional scaling using the logarithmic (MULTISCALE) loss function                                                                                                                                                                                                                                                                                                                                                                                                                             | 401 |
| <a href="#">LinkPred::LogRegCG&lt; InRndIt, OutRndIt &gt;</a>                                                                                                                                                                                                                                                                                                                                                                                                                                                                              |     |
| Logistic regression optimization problem                                                                                                                                                                                                                                                                                                                                                                                                                                                                                                   | 406 |
| <a href="#">LinkPred::LPSim</a>                                                                                                                                                                                                                                                                                                                                                                                                                                                                                                            |     |
| LP similarity (negative the Lp norm)                                                                                                                                                                                                                                                                                                                                                                                                                                                                                                       | 412 |
| <a href="#">LinkPred::MatFact&lt; Network &gt;</a>                                                                                                                                                                                                                                                                                                                                                                                                                                                                                         |     |
| Contains the implementation of an algorithm for embedding a network using matrix factorization. Reference: Koren, Y., Bell, R., and Volinsky, C. (2009). Matrix factorization techniques for recommender systems. Computer, 42(8):30–37 Ahmed, A., Shervashidze, N., Narayanamurthy, S., Josifovski, V., and Smola, A. J. (2013). Distributed large-scale natural graph factorization. In Proceedings of the 22nd International Conference on World Wide Web, WWW '13, pages 37–48, New York, NY, USA. Association for Computing Machinery | 416 |
| <a href="#">LinkPred::MatFactCG</a>                                                                                                                                                                                                                                                                                                                                                                                                                                                                                                        |     |
| Optimization problem associated with matrix factorization                                                                                                                                                                                                                                                                                                                                                                                                                                                                                  | 423 |
| <a href="#">LinkPred::MatFactPbData</a>                                                                                                                                                                                                                                                                                                                                                                                                                                                                                                    |     |
| A simple structure to store matrix factorization problem data                                                                                                                                                                                                                                                                                                                                                                                                                                                                              | 427 |
| <a href="#">LinkPred::MDS</a>                                                                                                                                                                                                                                                                                                                                                                                                                                                                                                              |     |
| Solve the <a href="#">MDS</a> problem                                                                                                                                                                                                                                                                                                                                                                                                                                                                                                      | 428 |

|                                                                                                                                                                                                                                                                                                                                                                                                                                                                  |     |
|------------------------------------------------------------------------------------------------------------------------------------------------------------------------------------------------------------------------------------------------------------------------------------------------------------------------------------------------------------------------------------------------------------------------------------------------------------------|-----|
| <a href="#">LinkPred::NetDistCalculator&lt; Network, DistType, NbHopsType &gt;</a>                                                                                                                                                                                                                                                                                                                                                                               |     |
| Interface for calculating the distance between nodes in a network . . . . .                                                                                                                                                                                                                                                                                                                                                                                      | 433 |
| <a href="#">LinkPred::NetIndSimlCalculator&lt; Network, DistType, NbHopsType &gt;</a>                                                                                                                                                                                                                                                                                                                                                                            |     |
| Interface for calculating the indirect similarity between nodes in a network . . . . .                                                                                                                                                                                                                                                                                                                                                                           | 438 |
| <a href="#">LinkPred::NetSimlCalculator&lt; Network, DistType, NbHopsType &gt;</a>                                                                                                                                                                                                                                                                                                                                                                               |     |
| Interface for calculating the similarity between nodes in a network . . . . .                                                                                                                                                                                                                                                                                                                                                                                    | 443 |
| <a href="#">LinkPred::NetworkManipulator&lt; Network &gt;</a>                                                                                                                                                                                                                                                                                                                                                                                                    |     |
| Class to manipulate network by removing or adding edges . . . . .                                                                                                                                                                                                                                                                                                                                                                                                | 450 |
| <a href="#">LinkPred::Node2Vec&lt; Network &gt;</a>                                                                                                                                                                                                                                                                                                                                                                                                              |     |
| <a href="#">Node2Vec</a> encoder. References: Grover, A. and Leskovec, J. (2016). Node2vec: Scalable feature learning for networks. In Proceedings of the 22nd ACM SIGKDD International Conference on Knowledge Discovery and Data Mining, KDD'16, pages 855–864, New York, NY, USA. Association for Computing Machinery. This implementation is based on the code <a href="https://github.com/xgfs/node2vec-c">https://github.com/xgfs/node2vec-c</a> . . . . . | 464 |
| <a href="#">LinkPred::DNetwork&lt; LabelT, NodeIDT, EdgeT &gt;::NodeDegIt</a>                                                                                                                                                                                                                                                                                                                                                                                    |     |
| Node-degree iterator. This class can be used to iterate over pairs of node IDs and in and out degrees . . . . .                                                                                                                                                                                                                                                                                                                                                  | 474 |
| <a href="#">LinkPred::UNetwork&lt; LabelT, NodeIDT, EdgeT &gt;::NodeDegIt</a>                                                                                                                                                                                                                                                                                                                                                                                    |     |
| Node-degree iterator. This class can be used to iterate over pairs of node IDs and degrees . . . . .                                                                                                                                                                                                                                                                                                                                                             | 484 |
| <a href="#">LinkPred::UNetwork&lt; LabelT, NodeIDT, EdgeT &gt;::NodeMap&lt; ValueType &gt;</a>                                                                                                                                                                                                                                                                                                                                                                   |     |
| A node map . . . . .                                                                                                                                                                                                                                                                                                                                                                                                                                             | 494 |
| <a href="#">LinkPred::DNetwork&lt; LabelT, NodeIDT, EdgeT &gt;::NodeMap&lt; ValueType &gt;</a>                                                                                                                                                                                                                                                                                                                                                                   |     |
| A node map . . . . .                                                                                                                                                                                                                                                                                                                                                                                                                                             | 499 |
| <a href="#">LinkPred::DNetwork&lt; LabelT, NodeIDT, EdgeT &gt;::NodeSMap&lt; ValueType &gt;</a>                                                                                                                                                                                                                                                                                                                                                                  |     |
| A sparse node map . . . . .                                                                                                                                                                                                                                                                                                                                                                                                                                      | 505 |
| <a href="#">LinkPred::UNetwork&lt; LabelT, NodeIDT, EdgeT &gt;::NodeSMap&lt; ValueType &gt;</a>                                                                                                                                                                                                                                                                                                                                                                  |     |
| A sparse node map . . . . .                                                                                                                                                                                                                                                                                                                                                                                                                                      | 510 |
| <a href="#">LinkPred::UNetwork&lt; LabelT, NodeIDT, EdgeT &gt;::NonEdgeIt</a>                                                                                                                                                                                                                                                                                                                                                                                    |     |
| Nonedges iterator . . . . .                                                                                                                                                                                                                                                                                                                                                                                                                                      | 517 |
| <a href="#">LinkPred::DNetwork&lt; LabelT, NodeIDT, EdgeT &gt;::NonEdgeIt</a>                                                                                                                                                                                                                                                                                                                                                                                    |     |
| Nonedges iterator . . . . .                                                                                                                                                                                                                                                                                                                                                                                                                                      | 526 |
| <a href="#">LinkPred::Utils::PairCompRight&lt; FirstT, SecondT, CompareT &gt;</a>                                                                                                                                                                                                                                                                                                                                                                                |     |
| Class for comparing pairs based on second elements only . . . . .                                                                                                                                                                                                                                                                                                                                                                                                | 536 |
| <a href="#">LinkPred::Pearson</a>                                                                                                                                                                                                                                                                                                                                                                                                                                |     |
| <a href="#">Pearson</a> similarity ( <a href="#">Pearson</a> correlation coefficient) . . . . .                                                                                                                                                                                                                                                                                                                                                                  | 537 |
| <a href="#">LinkPred::PEFactory&lt; Network, LPredictorT, TestDataT, PerfMeasureT &gt;</a>                                                                                                                                                                                                                                                                                                                                                                       |     |
| Factory class to create link predictors and performance measures . . . . .                                                                                                                                                                                                                                                                                                                                                                                       | 540 |
| <a href="#">LinkPred::PerfCurve&lt; PredResultsT &gt;</a>                                                                                                                                                                                                                                                                                                                                                                                                        |     |
| Abstract performance curve . . . . .                                                                                                                                                                                                                                                                                                                                                                                                                             | 541 |
| <a href="#">LinkPred::PerfEvalExpDescp&lt; Network &gt;</a>                                                                                                                                                                                                                                                                                                                                                                                                      |     |
| Structure storing experiment description . . . . .                                                                                                                                                                                                                                                                                                                                                                                                               | 547 |
| <a href="#">LinkPred::PerfEvalExp&lt; Network, TestDataT, LPredictorT, PredResultsT, PerfMeasureT &gt;</a>                                                                                                                                                                                                                                                                                                                                                       |     |
| Performance evaluation experiment . . . . .                                                                                                                                                                                                                                                                                                                                                                                                                      | 549 |
| <a href="#">LinkPred::PerfEvaluator&lt; TestDataT, LPredictorT, PredResultsT, PerfMeasureT &gt;</a>                                                                                                                                                                                                                                                                                                                                                              |     |
| Performance evaluator . . . . .                                                                                                                                                                                                                                                                                                                                                                                                                                  | 555 |
| <a href="#">LinkPred::PerfMeasure&lt; PredResultsT &gt;</a>                                                                                                                                                                                                                                                                                                                                                                                                      |     |
| Abstract performance measure . . . . .                                                                                                                                                                                                                                                                                                                                                                                                                           | 562 |
| <a href="#">LinkPred::Simp::PerfRes</a>                                                                                                                                                                                                                                                                                                                                                                                                                          |     |
| A structure to store performance results . . . . .                                                                                                                                                                                                                                                                                                                                                                                                               | 568 |
| <a href="#">LinkPred::PR&lt; PredResultsT &gt;</a>                                                                                                                                                                                                                                                                                                                                                                                                               |     |
| The precision recall curve . . . . .                                                                                                                                                                                                                                                                                                                                                                                                                             | 569 |
| <a href="#">LinkPred::Simp::Predictor</a>                                                                                                                                                                                                                                                                                                                                                                                                                        |     |
| A class that simplifies the use of link prediction algorithms . . . . .                                                                                                                                                                                                                                                                                                                                                                                          | 578 |
| <a href="#">LinkPred::PredResults&lt; TestDataT, LPredictorT, ScoresContainerT &gt;</a>                                                                                                                                                                                                                                                                                                                                                                          |     |
| A class to store and manage prediction results . . . . .                                                                                                                                                                                                                                                                                                                                                                                                         | 614 |
| <a href="#">LinkPred::Simp::Evaluator::Factory::PSTParams</a>                                                                                                                                                                                                                                                                                                                                                                                                    |     |
| Parameters of PST . . . . .                                                                                                                                                                                                                                                                                                                                                                                                                                      | 626 |



|                                                                                                        |     |
|--------------------------------------------------------------------------------------------------------|-----|
| <a href="#">LinkPred::RandomGen</a>                                                                    |     |
| A random number generator . . . . .                                                                    | 627 |
| <a href="#">LinkPred::RndClassifier&lt; InRndIt, OutRndIt, ScoreRndIt &gt;</a>                         |     |
| Random classifier . . . . .                                                                            | 632 |
| <a href="#">LinkPred::UNetwork&lt; LabelT, NodeIDT, EdgeT &gt;::RndEdgelt</a>                          |     |
| Randomized edges iterator . . . . .                                                                    | 636 |
| <a href="#">LinkPred::DNetwork&lt; LabelT, NodeIDT, EdgeT &gt;::RndEdgelt</a>                          |     |
| Randomized edges iterator . . . . .                                                                    | 641 |
| <a href="#">LinkPred::DNetwork&lt; LabelT, NodeIDT, EdgeT &gt;::RndNodeIt</a>                          |     |
| Randomized Nodes iterator . . . . .                                                                    | 646 |
| <a href="#">LinkPred::UNetwork&lt; LabelT, NodeIDT, EdgeT &gt;::RndNodeIt</a>                          |     |
| Randomized Nodes iterator . . . . .                                                                    | 651 |
| <a href="#">LinkPred::UNetwork&lt; LabelT, NodeIDT, EdgeT &gt;::RndNonEdgelt</a>                       |     |
| Randomized nonedges iterator . . . . .                                                                 | 656 |
| <a href="#">LinkPred::DNetwork&lt; LabelT, NodeIDT, EdgeT &gt;::RndNonEdgelt</a>                       |     |
| Randomized nonedges iterator . . . . .                                                                 | 661 |
| <a href="#">LinkPred::Simp::Evaluator::Factory::RNDParams</a>                                          |     |
| Parameters of RND . . . . .                                                                            | 666 |
| <a href="#">LinkPred::ROC&lt; PredResultsT &gt;</a>                                                    |     |
| Receiver Operating Characteristic curve . . . . .                                                      | 667 |
| <a href="#">LinkPred::Simp::Evaluator::Factory::SBMParams</a>                                          |     |
| Parameters of SBM . . . . .                                                                            | 677 |
| <a href="#">LinkPred::PredResults&lt; TestDataT, LPredictorT, ScoresContainerT &gt;::ScoreIterator</a> |     |
| Score iterator . . . . .                                                                               | 678 |
| <a href="#">LinkPred::Simp::Evaluator::Factory::SHPPParams</a>                                         |     |
| Parameters of SHP . . . . .                                                                            | 689 |
| <a href="#">LinkPred::SimMeasure</a>                                                                   |     |
| Interface of a similarity measure . . . . .                                                            | 690 |
| <a href="#">LinkPred::TestData&lt; Network, EdgeContT &gt;</a>                                         |     |
| Test data . . . . .                                                                                    | 693 |
| <a href="#">LinkPred::TestEdgeGen&lt; Network, EdgeContT &gt;</a>                                      |     |
| Generate true positives and true negatives . . . . .                                                   | 704 |
| <a href="#">LinkPred::TestData&lt; Network, EdgeContT &gt;::TestEdgelt</a>                             |     |
| Test edges iterator . . . . .                                                                          | 709 |
| <a href="#">LinkPred::TestEdgeGen&lt; Network, EdgeContT &gt;::TNEdgelt</a>                            |     |
| TN edges iterator . . . . .                                                                            | 719 |
| <a href="#">LinkPred::TestEdgeGen&lt; Network, EdgeContT &gt;::TPEdgelt</a>                            |     |
| TP edges iterator . . . . .                                                                            | 729 |
| <a href="#">LinkPred::TPR&lt; PredResultsT &gt;</a>                                                    |     |
| Compute top precision . . . . .                                                                        | 738 |
| <a href="#">LinkPred::UADAPredictor&lt; Network, EdgeRndIt, ScoreRndIt, EdgeRndOutIt &gt;</a>          |     |
| Adamic Adar index link predictor . . . . .                                                             | 745 |
| <a href="#">LinkPred::UCNEPredictor&lt; Network, EdgeRndIt, ScoreRndIt, EdgeRndOutIt &gt;</a>          |     |
| Common neighbor link predictor . . . . .                                                               | 751 |
| <a href="#">LinkPred::UCRAPredictor&lt; Network, EdgeRndIt, ScoreRndIt, EdgeRndOutIt &gt;</a>          |     |
| Local path link predictor . . . . .                                                                    | 756 |
| <a href="#">LinkPred::UCSTPredictor&lt; Network, EdgeRndIt, ScoreRndIt, EdgeRndOutIt &gt;</a>          |     |
| Constant link predictor . . . . .                                                                      | 762 |
| <a href="#">LinkPred::UECLPredictor&lt; Network, EdgeRndIt, ScoreRndIt, EdgeRndOutIt &gt;</a>          |     |
| Encoder-classifier link predictor . . . . .                                                            | 768 |
| <a href="#">LinkPred::UESMPredictor&lt; Network, EdgeRndIt, ScoreRndIt, EdgeRndOutIt &gt;</a>          |     |
| Encoder-Similarity measure link predictor . . . . .                                                    | 775 |
| <a href="#">LinkPred::UFBMPredictor&lt; Network, EdgeRndIt, ScoreRndIt, EdgeRndOutIt &gt;</a>          |     |
| Fast blocking model link predictor . . . . .                                                           | 781 |
| <a href="#">LinkPred::UHDIPredictor&lt; Network, EdgeRndIt, ScoreRndIt, EdgeRndOutIt &gt;</a>          |     |
| Hub depromoted index link predictor . . . . .                                                          | 786 |
| <a href="#">LinkPred::UHPIPredictor&lt; Network, EdgeRndIt, ScoreRndIt, EdgeRndOutIt &gt;</a>          |     |
| Hub promoted index link predictor . . . . .                                                            | 792 |

|                                                                                                                                                                                                                                                                                                                                                        |     |
|--------------------------------------------------------------------------------------------------------------------------------------------------------------------------------------------------------------------------------------------------------------------------------------------------------------------------------------------------------|-----|
| <a href="#">LinkPred::UHRGPredictor&lt; Network, EdgeRndIt, ScoreRndIt, EdgeRndOutIt &gt;</a>                                                                                                                                                                                                                                                          |     |
| HRG predictor                                                                                                                                                                                                                                                                                                                                          | 797 |
| <a href="#">LinkPred::UHYPPredictor&lt; Network, EdgeRndIt, ScoreRndIt, EdgeRndOutIt &gt;</a>                                                                                                                                                                                                                                                          |     |
| Hypermap predictor                                                                                                                                                                                                                                                                                                                                     | 803 |
| <a href="#">LinkPred::UJIDPredictor&lt; Network, EdgeRndIt, ScoreRndIt, EdgeRndOutIt &gt;</a>                                                                                                                                                                                                                                                          |     |
| Jackard index link predictor                                                                                                                                                                                                                                                                                                                           | 811 |
| <a href="#">LinkPred::UKABPredictor&lt; Network, EdgeRndIt, ScoreRndIt, EdgeRndOutIt &gt;</a>                                                                                                                                                                                                                                                          |     |
| A scalable popularity similarity link predictor proposed in: "Kerrache, S., Alharbi, R. & Benhi-dour, H. A Scalable Similarity-Popularity Link Prediction Method. Sci Rep 10, 6394 (2020)".<br><a href="https://doi.org/10.1038/s41598-020-62636-1">https://doi.org/10.1038/s41598-020-62636-1</a>                                                     | 817 |
| <a href="#">LinkPred::ULCPPredictor&lt; Network, EdgeRndIt, ScoreRndIt, EdgeRndOutIt &gt;</a>                                                                                                                                                                                                                                                          |     |
| Local path link predictor                                                                                                                                                                                                                                                                                                                              | 824 |
| <a href="#">LinkPred::ULHNPredictor&lt; Network, EdgeRndIt, ScoreRndIt, EdgeRndOutIt &gt;</a>                                                                                                                                                                                                                                                          |     |
| Leicht-Holme-Newman index link predictor                                                                                                                                                                                                                                                                                                               | 829 |
| <a href="#">LinkPred::ULPredictor&lt; NetworkT, EdgeRndItT, ScoreRndItT, EdgeRndOutItT &gt;</a>                                                                                                                                                                                                                                                        |     |
| The interface of a link predictor in an undirected network                                                                                                                                                                                                                                                                                             | 835 |
| <a href="#">LinkPred::UMPSPredictor&lt; Network, EdgeRndIt, ScoreRndIt, EdgeRndOutIt &gt;</a>                                                                                                                                                                                                                                                          |     |
| A scalable popularity similarity link predictor                                                                                                                                                                                                                                                                                                        | 843 |
| <a href="#">LinkPred::UNEDPredictor&lt; Network, EdgeRndIt, ScoreRndIt, EdgeRndOutIt &gt;</a>                                                                                                                                                                                                                                                          |     |
| A neighbors degree link predictor                                                                                                                                                                                                                                                                                                                      | 861 |
| <a href="#">LinkPred::UNetwork&lt; LabelT, NodeIDT, EdgeT &gt;</a>                                                                                                                                                                                                                                                                                     |     |
| This class represents an undirected network in the sense of graph theory                                                                                                                                                                                                                                                                               | 867 |
| <a href="#">LinkPred::UPATPredictor&lt; Network, EdgeRndIt, ScoreRndIt, EdgeRndOutIt &gt;</a>                                                                                                                                                                                                                                                          |     |
| A preferential attachment link predictor                                                                                                                                                                                                                                                                                                               | 895 |
| <a href="#">LinkPred::UPSTPredictor&lt; Network, EdgeRndIt, ScoreRndIt, EdgeRndOutIt &gt;</a>                                                                                                                                                                                                                                                          |     |
| A link predictor that prestores edge scores. This allows to seemingly integrate results from external link prediction algorithms to <a href="#">LinkPred</a> (for example, users may implement their own link prediction algorithm and then use this link predictor to use compare their results to algorithms available in <a href="#">LinkPred</a> ) | 900 |
| <a href="#">LinkPred::URALPredictor&lt; Network, EdgeRndIt, ScoreRndIt, EdgeRndOutIt &gt;</a>                                                                                                                                                                                                                                                          |     |
| A resource allocation link predictor                                                                                                                                                                                                                                                                                                                   | 905 |
| <a href="#">LinkPred::URNDPredictor&lt; Network, EdgeRndIt, ScoreRndIt, EdgeRndOutIt &gt;</a>                                                                                                                                                                                                                                                          |     |
| A random link predictor                                                                                                                                                                                                                                                                                                                                | 911 |
| <a href="#">LinkPred::USAIPredictor&lt; Network, EdgeRndIt, ScoreRndIt, EdgeRndOutIt &gt;</a>                                                                                                                                                                                                                                                          |     |
| A Salton index link predictor                                                                                                                                                                                                                                                                                                                          | 915 |
| <a href="#">LinkPred::USBMPredictor&lt; Network, EdgeRndIt, ScoreRndIt, EdgeRndOutIt &gt;</a>                                                                                                                                                                                                                                                          |     |
| The stochastic block model link predictor                                                                                                                                                                                                                                                                                                              | 922 |
| <a href="#">LinkPred::USHPPredictor&lt; Network, EdgeRndIt, ScoreRndIt, EdgeRndOutIt &gt;</a>                                                                                                                                                                                                                                                          |     |
| A shortest path link predictor link predictor                                                                                                                                                                                                                                                                                                          | 927 |
| <a href="#">LinkPred::USOIPredictor&lt; Network, EdgeRndIt, ScoreRndIt, EdgeRndOutIt &gt;</a>                                                                                                                                                                                                                                                          |     |
| A Sorensen index link predictor                                                                                                                                                                                                                                                                                                                        | 935 |
| <a href="#">LinkPred::USUMPredictor&lt; Network, EdgeRndIt, ScoreRndIt, EdgeRndOutIt &gt;</a>                                                                                                                                                                                                                                                          |     |
| A sum-of-degrees link predictor                                                                                                                                                                                                                                                                                                                        | 941 |
| <a href="#">LinkPred::Vec</a>                                                                                                                                                                                                                                                                                                                          |     |
| This class represent a vector (in the sense of linear algebra)                                                                                                                                                                                                                                                                                         | 946 |

## Chapter 6

# File Index

### 6.1 File List

Here is a list of all documented files with brief descriptions:

|                                                                                                         |      |
|---------------------------------------------------------------------------------------------------------|------|
| bindings/Java/include/ <a href="#">LinkPredJavaConfig.hpp</a>                                           |      |
| Contains configuration options                                                                          | 971  |
| bindings/Python/include/ <a href="#">LinkPredPythonConfig.hpp</a>                                       |      |
| Contains configuration options                                                                          | 971  |
| include/ <a href="#">LinkPredConfig.hpp</a>                                                             |      |
| Contains configuration options                                                                          | 972  |
| include/ <a href="#">linkpred.hpp</a>                                                                   |      |
| Includes all headers of the library                                                                     | 972  |
| include/linkpred/ <a href="#">instantiations.hpp</a>                                                    |      |
| Contains explicit instantiations of template classes                                                    | 1004 |
| include/linkpred/core/ <a href="#">core.hpp</a>                                                         |      |
| Includes the headers related to core classes                                                            | 973  |
| include/linkpred/core/dnetwork/ <a href="#">dnetwork.hpp</a>                                            |      |
| Contains the implementation of a directed network data structure                                        | 974  |
| include/linkpred/core/ds/ <a href="#">bheap.hpp</a>                                                     |      |
| Contains the implementation of a templated binary heap                                                  | 975  |
| include/linkpred/core/ds/ <a href="#">bhmap.hpp</a>                                                     |      |
| Contains the implementation of a templated bidirectional half map                                       | 976  |
| include/linkpred/core/ds/ <a href="#">ds.hpp</a>                                                        |      |
| Includes the headers related to data structures                                                         | 977  |
| include/linkpred/core/ds/ <a href="#">lmapqueue.hpp</a>                                                 |      |
| Contains the implementation of a templated map-priority queue with limit on the capacity                | 978  |
| include/linkpred/core/unetwork/ <a href="#">unetwork.hpp</a>                                            |      |
| Contains the implementation of an undirected network data structure                                     | 979  |
| include/linkpred/graphalg/ <a href="#">graphalg.hpp</a>                                                 |      |
| Includes the headers related to graph algorithms                                                        | 997  |
| include/linkpred/graphalg/encoders/ <a href="#">encoder.hpp</a>                                         |      |
| Contains the interface of a network encoder                                                             | 983  |
| include/linkpred/graphalg/encoders/ <a href="#">encoders.hpp</a>                                        |      |
| Includes the headers related to network encoders                                                        | 984  |
| include/linkpred/graphalg/encoders/deepwalk/ <a href="#">deepwalk.hpp</a>                               |      |
| DeepWalk encoder                                                                                        | 981  |
| include/linkpred/graphalg/encoders/hmsm/ <a href="#">hmsm.hpp</a>                                       |      |
| Contains the implementation of an algorithm for embedding a network using a a hidden metric space model | 985  |

|                                                                                                                                                                                                                                                                                                                                                                                                                                                                                                                                            |      |
|--------------------------------------------------------------------------------------------------------------------------------------------------------------------------------------------------------------------------------------------------------------------------------------------------------------------------------------------------------------------------------------------------------------------------------------------------------------------------------------------------------------------------------------------|------|
| include/linkpred/graphalg/encoders/largevis/largevis.hpp                                                                                                                                                                                                                                                                                                                                                                                                                                                                                   |      |
| LargeVis encoder                                                                                                                                                                                                                                                                                                                                                                                                                                                                                                                           | 987  |
| include/linkpred/graphalg/encoders/lem/lem.hpp                                                                                                                                                                                                                                                                                                                                                                                                                                                                                             |      |
| Contains the implementation of Laplacian eigenmaps embedding (LEM)                                                                                                                                                                                                                                                                                                                                                                                                                                                                         | 988  |
| include/linkpred/graphalg/encoders/line/line.hpp                                                                                                                                                                                                                                                                                                                                                                                                                                                                                           |      |
| The LINE (Large-scale Information Network Embedding) encoder                                                                                                                                                                                                                                                                                                                                                                                                                                                                               | 989  |
| include/linkpred/graphalg/encoders/lle/lle.hpp                                                                                                                                                                                                                                                                                                                                                                                                                                                                                             |      |
| Contains the implementation of locally linear graph embedding (LLE)                                                                                                                                                                                                                                                                                                                                                                                                                                                                        | 991  |
| include/linkpred/graphalg/encoders/matfact/matfact.hpp                                                                                                                                                                                                                                                                                                                                                                                                                                                                                     |      |
| Contains the implementation of an algorithm for embedding a network using matrix factorization. Reference: Koren, Y., Bell, R., and Volinsky, C. (2009). Matrix factorization techniques for recommender systems. Computer, 42(8):30–37 Ahmed, A., Shervashidze, N., Narayanamurthy, S., Josifovski, V., and Smola, A. J. (2013). Distributed large-scale natural graph factorization. In Proceedings of the 22nd International Conference on World Wide Web, WWW '13, pages 37–48, New York, NY, USA. Association for Computing Machinery | 992  |
| include/linkpred/graphalg/encoders/matfact/matfactcg.hpp                                                                                                                                                                                                                                                                                                                                                                                                                                                                                   |      |
| Contains the implementation of the optimization problem associated with matrix factorization                                                                                                                                                                                                                                                                                                                                                                                                                                               | 994  |
| include/linkpred/graphalg/encoders/node2vec/node2vec.hpp                                                                                                                                                                                                                                                                                                                                                                                                                                                                                   |      |
| A node2vec encoder                                                                                                                                                                                                                                                                                                                                                                                                                                                                                                                         | 996  |
| include/linkpred/graphalg/shortestpaths/dijkstra.hpp                                                                                                                                                                                                                                                                                                                                                                                                                                                                                       |      |
| Contains an implementation of Dijkstra's algorithm                                                                                                                                                                                                                                                                                                                                                                                                                                                                                         | 998  |
| include/linkpred/graphalg/shortestpaths/netdistcalculator.hpp                                                                                                                                                                                                                                                                                                                                                                                                                                                                              |      |
| Contains the implementation of classes for computing distances in network                                                                                                                                                                                                                                                                                                                                                                                                                                                                  | 999  |
| include/linkpred/graphalg/shortestpaths/shortestpaths.hpp                                                                                                                                                                                                                                                                                                                                                                                                                                                                                  |      |
| Includes the headers related to shortest paths algorithms                                                                                                                                                                                                                                                                                                                                                                                                                                                                                  | 1001 |
| include/linkpred/graphalg/traversal/graphtraversal.hpp                                                                                                                                                                                                                                                                                                                                                                                                                                                                                     |      |
| Contains the implementation of graph traversal algorithms                                                                                                                                                                                                                                                                                                                                                                                                                                                                                  | 1002 |
| include/linkpred/graphalg/traversal/traversal.hpp                                                                                                                                                                                                                                                                                                                                                                                                                                                                                          |      |
| Includes the headers related to graph traversal algorithms                                                                                                                                                                                                                                                                                                                                                                                                                                                                                 | 1004 |
| include/linkpred/ml/ml.hpp                                                                                                                                                                                                                                                                                                                                                                                                                                                                                                                 |      |
| Includes the headers related to learning-based predictors                                                                                                                                                                                                                                                                                                                                                                                                                                                                                  | 1020 |
| include/linkpred/ml/classifiers/classifier.hpp                                                                                                                                                                                                                                                                                                                                                                                                                                                                                             |      |
| Contains the interface of a classifier                                                                                                                                                                                                                                                                                                                                                                                                                                                                                                     | 1005 |
| include/linkpred/ml/classifiers/classifiers.hpp                                                                                                                                                                                                                                                                                                                                                                                                                                                                                            |      |
| Includes the headers related to classifiers                                                                                                                                                                                                                                                                                                                                                                                                                                                                                                | 1007 |
| include/linkpred/ml/classifiers/ffn/ffn.hpp                                                                                                                                                                                                                                                                                                                                                                                                                                                                                                |      |
| Contains a wrapper of mlpack::ann::FFN (feed-forward neural network)                                                                                                                                                                                                                                                                                                                                                                                                                                                                       | 1008 |
| include/linkpred/ml/classifiers/linearsvm/linearsvm.hpp                                                                                                                                                                                                                                                                                                                                                                                                                                                                                    |      |
| Contains a wrapper of mlpack::smv::LinearSVM                                                                                                                                                                                                                                                                                                                                                                                                                                                                                               | 1010 |
| include/linkpred/ml/classifiers/logistic/logisticregressor.hpp                                                                                                                                                                                                                                                                                                                                                                                                                                                                             |      |
| Contains the implementation of a logistic regression algorithm                                                                                                                                                                                                                                                                                                                                                                                                                                                                             | 1012 |
| include/linkpred/ml/classifiers/logistic/logregcg.hpp                                                                                                                                                                                                                                                                                                                                                                                                                                                                                      |      |
| Contains the implementation of a logistic regression optimization problem                                                                                                                                                                                                                                                                                                                                                                                                                                                                  | 1015 |
| include/linkpred/ml/classifiers/naivebayes/naivebayes.hpp                                                                                                                                                                                                                                                                                                                                                                                                                                                                                  |      |
| Contains a wrapper of mlpack::maive_bayes::NaiveBayesClassifier                                                                                                                                                                                                                                                                                                                                                                                                                                                                            | 1016 |
| include/linkpred/ml/classifiers/rndclassifier/rndclassifier.hpp                                                                                                                                                                                                                                                                                                                                                                                                                                                                            |      |
| Contains a random classifier (for debugging purposes)                                                                                                                                                                                                                                                                                                                                                                                                                                                                                      | 1017 |
| include/linkpred/ml/simmeasures/cosinesim.hpp                                                                                                                                                                                                                                                                                                                                                                                                                                                                                              |      |
| Contains the implementation of cosine similarity                                                                                                                                                                                                                                                                                                                                                                                                                                                                                           | 1021 |
| include/linkpred/ml/simmeasures/dotprod.hpp                                                                                                                                                                                                                                                                                                                                                                                                                                                                                                |      |
| Contains the implementation of the dot product similarity measure                                                                                                                                                                                                                                                                                                                                                                                                                                                                          | 1023 |
| include/linkpred/ml/simmeasures/l1sim.hpp                                                                                                                                                                                                                                                                                                                                                                                                                                                                                                  |      |
| Contains the implementation of L1 similarity                                                                                                                                                                                                                                                                                                                                                                                                                                                                                               | 1025 |
| include/linkpred/ml/simmeasures/l2sim.hpp                                                                                                                                                                                                                                                                                                                                                                                                                                                                                                  |      |
| Contains the implementation of L2 similarity                                                                                                                                                                                                                                                                                                                                                                                                                                                                                               | 1027 |
| include/linkpred/ml/simmeasures/lpsim.hpp                                                                                                                                                                                                                                                                                                                                                                                                                                                                                                  |      |
| Contains the implementation of LP similarity                                                                                                                                                                                                                                                                                                                                                                                                                                                                                               | 1029 |

|                                                                                                                                                   |      |
|---------------------------------------------------------------------------------------------------------------------------------------------------|------|
| include/linkpred/ml/simmeasures/ <a href="#">pearson.hpp</a>                                                                                      |      |
| Contains the implementation of Pearson similarity                                                                                                 | 1031 |
| include/linkpred/ml/simmeasures/ <a href="#">simmeasure.hpp</a>                                                                                   |      |
| Contains the interface of a similarity measure                                                                                                    | 1033 |
| include/linkpred/ml/simmeasures/ <a href="#">simmeasures.hpp</a>                                                                                  |      |
| Includes the headers related to similarity measures                                                                                               | 1034 |
| include/linkpred/numerical/ <a href="#">numerical.hpp</a>                                                                                         |      |
| Includes the headers related to numerical algorithms                                                                                              | 1043 |
| include/linkpred/numerical/linear/ <a href="#">gfmatrix.hpp</a>                                                                                   |      |
| Contains the implementation of a full matrix                                                                                                      | 1035 |
| include/linkpred/numerical/linear/ <a href="#">vec.hpp</a>                                                                                        |      |
| Contains the implementation of a vector (in the sense of linear algebra)                                                                          | 1037 |
| include/linkpred/numerical/mds/ <a href="#">logmdscg.hpp</a>                                                                                      |      |
| Contains the implementation of the optimization problem associated with multidimensional scaling using the logarithmic (MULTISCALE) loss function | 1038 |
| include/linkpred/numerical/mds/ <a href="#">mds.hpp</a>                                                                                           |      |
| Contains the implementation of a solver of the multidimensional scaling problem using the logarithmic (MULTISCALE) loss function                  | 1039 |
| include/linkpred/numerical/mf/ <a href="#">fastsig.hpp</a>                                                                                        |      |
| Contains the implementation of a fast sigmoid                                                                                                     | 1041 |
| include/linkpred/perf/ <a href="#">networkmanipulator.hpp</a>                                                                                     |      |
| Contains the implementation of test data related classes                                                                                          | 1043 |
| include/linkpred/perf/ <a href="#">perf.hpp</a>                                                                                                   |      |
| Includes the headers related to performance evaluation classes                                                                                    | 1046 |
| include/linkpred/perf/ <a href="#">perfevaluator.hpp</a>                                                                                          |      |
| Includes the headers related to core classes                                                                                                      | 1047 |
| include/linkpred/perf/ <a href="#">perfmeasure.hpp</a>                                                                                            |      |
| Contains the implementation of several performance measures                                                                                       | 1049 |
| include/linkpred/perf/ <a href="#">predresults.hpp</a>                                                                                            |      |
| Contains the implementation of a class to store and manage prediction results                                                                     | 1055 |
| include/linkpred/predictors/ <a href="#">predictors.hpp</a>                                                                                       |      |
| Includes the headers of link predictors                                                                                                           | 1076 |
| include/linkpred/predictors/directed/ <a href="#">dadapredictor.hpp</a>                                                                           |      |
| Contains the implementation of a common neighbor link predictor                                                                                   | 1057 |
| include/linkpred/predictors/directed/ <a href="#">dcnepredictor.hpp</a>                                                                           |      |
| Contains the implementation of a common neighbor link predictor                                                                                   | 1059 |
| include/linkpred/predictors/directed/ <a href="#">dhdpredictor.hpp</a>                                                                            |      |
| Contains the implementation of a common neighbor link predictor                                                                                   | 1060 |
| include/linkpred/predictors/directed/ <a href="#">dhpipredictor.hpp</a>                                                                           |      |
| Contains the implementation of a common neighbor link predictor                                                                                   | 1062 |
| include/linkpred/predictors/directed/ <a href="#">directed.hpp</a>                                                                                |      |
| Includes the headers of link predictors for directed networks                                                                                     | 1063 |
| include/linkpred/predictors/directed/ <a href="#">djidpredictor.hpp</a>                                                                           |      |
| Contains the implementation of a common neighbor link predictor                                                                                   | 1064 |
| include/linkpred/predictors/directed/ <a href="#">dlcppredictor.hpp</a>                                                                           |      |
| Contains the implementation of a directed LCP link predictor                                                                                      | 1066 |
| include/linkpred/predictors/directed/ <a href="#">dlhnpredictor.hpp</a>                                                                           |      |
| Contains the implementation of a common neighbor link predictor                                                                                   | 1067 |
| include/linkpred/predictors/directed/ <a href="#">dlpredictor.hpp</a>                                                                             |      |
| Contains the interface of a link predictor                                                                                                        | 1069 |
| include/linkpred/predictors/directed/ <a href="#">dpatpredictor.hpp</a>                                                                           |      |
| Contains the implementation of a common neighbor link predictor                                                                                   | 1070 |
| include/linkpred/predictors/directed/ <a href="#">dpstpredictor.hpp</a>                                                                           |      |
| Contains the implementation of a link predictor that prestores the scores of edges                                                                | 1071 |
| include/linkpred/predictors/directed/ <a href="#">dsaipredictor.hpp</a>                                                                           |      |
| Contains the implementation of a common neighbor link predictor                                                                                   | 1073 |
| include/linkpred/predictors/directed/ <a href="#">dsoipredictor.hpp</a>                                                                           |      |
| Contains the implementation of a common neighbor link predictor                                                                                   | 1074 |

|                                                                                                        |      |
|--------------------------------------------------------------------------------------------------------|------|
| include/linkpred/predictors/undirected/ <a href="#">uadapredictor.hpp</a>                              |      |
| Contains the implementation of an Adamic Adar index link predictor . . . . .                           | 1076 |
| include/linkpred/predictors/undirected/ <a href="#">ucnepredictor.hpp</a>                              |      |
| Contains the implementation of a common neighbor link predictor . . . . .                              | 1078 |
| include/linkpred/predictors/undirected/ <a href="#">ucrapredictor.hpp</a>                              |      |
| Contains the implementation of the Cannistraci Resource Allocation link predictor . . . . .            | 1080 |
| include/linkpred/predictors/undirected/ <a href="#">ucstpredictor.hpp</a>                              |      |
| Contains the implementation of a constant link predictor . . . . .                                     | 1081 |
| include/linkpred/predictors/undirected/ <a href="#">ueclpredictor.hpp</a>                              |      |
| Contains the implementation of an encoder-classifier link predictor . . . . .                          | 1083 |
| include/linkpred/predictors/undirected/ <a href="#">uesmpredictor.hpp</a>                              |      |
| Contains the implementation of an encoder-similarity measure link predictor . . . . .                  | 1084 |
| include/linkpred/predictors/undirected/ <a href="#">ufbmpredictor.hpp</a>                              |      |
| Contains the implementation of the fast blocking model link predictor . . . . .                        | 1086 |
| include/linkpred/predictors/undirected/ <a href="#">uhdipredictor.hpp</a>                              |      |
| Contains the implementation of a hub depromoted index link predictor . . . . .                         | 1087 |
| include/linkpred/predictors/undirected/ <a href="#">uhpipredictor.hpp</a>                              |      |
| Contains the implementation of a hub promoted index link predictor . . . . .                           | 1089 |
| include/linkpred/predictors/undirected/ <a href="#">uhrgpredictor.hpp</a>                              |      |
| Contains the implementation of the HRG link predictor . . . . .                                        | 1090 |
| include/linkpred/predictors/undirected/ <a href="#">uhyppredictor.hpp</a>                              |      |
| Contains the implementation of the hypermap link predictor . . . . .                                   | 1092 |
| include/linkpred/predictors/undirected/ <a href="#">ujidpredictor.hpp</a>                              |      |
| Contains the implementation of a Jackard index link predictor . . . . .                                | 1094 |
| include/linkpred/predictors/undirected/ <a href="#">ukabpredictor.hpp</a>                              |      |
| Contains the implementation of a scalable popularity-similarity link predictor . . . . .               | 1096 |
| include/linkpred/predictors/undirected/ <a href="#">ulcppredictor.hpp</a>                              |      |
| Contains the implementation of a local path link predictor . . . . .                                   | 1098 |
| include/linkpred/predictors/undirected/ <a href="#">ulhnpredictor.hpp</a>                              |      |
| Contains the implementation of a Leicht-Holme-Newman index link predictor . . . . .                    | 1099 |
| include/linkpred/predictors/undirected/ <a href="#">ulpredictor.hpp</a>                                |      |
| Contains the interface of a link predictor . . . . .                                                   | 1101 |
| include/linkpred/predictors/undirected/ <a href="#">umspredictor.hpp</a>                               |      |
| Contains the implementation of a scalable popularity similarity link predictor . . . . .               | 1102 |
| include/linkpred/predictors/undirected/ <a href="#">undirected.hpp</a>                                 |      |
| Includes the headers of link predictors for undirected networks . . . . .                              | 1102 |
| include/linkpred/predictors/undirected/ <a href="#">unedpredictor.hpp</a>                              |      |
| Contains the implementation of a link prediction algorithm based on the degrees of neighbors . . . . . | 1104 |
| include/linkpred/predictors/undirected/ <a href="#">upatpredictor.hpp</a>                              |      |
| Contains the implementation of a preferential attachment link predictor . . . . .                      | 1106 |
| include/linkpred/predictors/undirected/ <a href="#">upstpredictor.hpp</a>                              |      |
| Contains the implementation of a link predictor that prestores the scores of edges . . . . .           | 1108 |
| include/linkpred/predictors/undirected/ <a href="#">uralpredictor.hpp</a>                              |      |
| Contains the implementation of a resource allocation link predictor . . . . .                          | 1109 |
| include/linkpred/predictors/undirected/ <a href="#">urndpredictor.hpp</a>                              |      |
| Contains the implementation of a random link predictor . . . . .                                       | 1111 |
| include/linkpred/predictors/undirected/ <a href="#">usaipredictor.hpp</a>                              |      |
| Contains the implementation of a Salton index link predictor . . . . .                                 | 1113 |
| include/linkpred/predictors/undirected/ <a href="#">usbmpredictor.hpp</a>                              |      |
| Contains the implementation of the stochastic block model link predictor . . . . .                     | 1114 |
| include/linkpred/predictors/undirected/ <a href="#">ushppredictor.hpp</a>                              |      |
| Contains the implementation of a shortest path link predictor . . . . .                                | 1116 |
| include/linkpred/predictors/undirected/ <a href="#">usoipredictor.hpp</a>                              |      |
| Contains the implementation of a Sorensen index link predictor . . . . .                               | 1118 |
| include/linkpred/predictors/undirected/ <a href="#">usumpredictor.hpp</a>                              |      |
| Contains the implementation of a sum-of-degrees link predictor . . . . .                               | 1119 |
| include/linkpred/simp/ <a href="#">edgescore.hpp</a>                                                   |      |
| Contains the definition of a structure to store the score of an edge . . . . .                         | 1121 |

|                                                                                                       |      |
|-------------------------------------------------------------------------------------------------------|------|
| include/linkpred/simp/ <a href="#">evaluator.hpp</a>                                                  |      |
| Contains the definition of a class that simplifies the evaluation of link prediction algorithms . . . | 1122 |
| include/linkpred/simp/ <a href="#">perfres.hpp</a>                                                    |      |
| Contains the definition of a structure to store performance results . . . . .                         | 1123 |
| include/linkpred/simp/ <a href="#">predictor.hpp</a>                                                  |      |
| Contains the definition of a class that simplifies the use of link prediction algorithms . . . . .    | 1125 |
| include/linkpred/simp/ <a href="#">simp.hpp</a>                                                       |      |
| Includes all headers of the essential interface . . . . .                                             | 1126 |
| include/linkpred/utis/ <a href="#">log.hpp</a>                                                        |      |
| Contains the implementation of a log class . . . . .                                                  | 1127 |
| include/linkpred/utis/ <a href="#">loglevel.hpp</a>                                                   |      |
| Contains the definition of log levels . . . . .                                                       | 1128 |
| include/linkpred/utis/ <a href="#">miscutils.hpp</a>                                                  |      |
| Contains the implementation of miscellaneous useful methods . . . . .                                 | 1129 |
| include/linkpred/utis/ <a href="#">randomgen.hpp</a>                                                  |      |
| Contains the implementation of a random number generator . . . . .                                    | 1132 |
| include/linkpred/utis/ <a href="#">utils.hpp</a>                                                      |      |
| Includes the headers related to utility classes . . . . .                                             | 1133 |





## Chapter 7

# Module Documentation

### 7.1 Core classes

This group contains core classes.

#### Files

- file [core.hpp](#)  
*Includes the headers related to core classes.*
- file [dnetwork.hpp](#)  
*Contains the implementation of a directed network data structure.*
- file [bheap.hpp](#)  
*Contains the implementation of a templated binary heap.*
- file [ds.hpp](#)  
*Includes the headers related to data structures.*
- file [lmapqueue.hpp](#)  
*Contains the implementation of a templated map-priority queue with limit on the capacity.*
- file [unetwork.hpp](#)  
*Contains the implementation of an undirected network data structure.*

#### 7.1.1 Detailed Description

This group contains core classes.

## 7.2 Graph algorithms.

This group contains graph algorithms.

### Files

- file [deepwalk.hpp](#)  
*DeepWalk encoder.*
- file [encoder.hpp](#)  
*Contains the interface of a network encoder.*
- file [encoders.hpp](#)  
*Includes the headers related to network encoders.*
- file [hmsm.hpp](#)  
*Contains the implementation of an algorithm for embedding a network using a a hidden metric space model.*
- file [largevis.hpp](#)  
*LargeVis encoder.*
- file [lem.hpp](#)  
*Contains the implementation of Laplacian eigenmaps embedding (LEM).*
- file [line.hpp](#)  
*The LINE (Large-scale Information Network Embedding) encoder.*
- file [lle.hpp](#)  
*Contains the implementation of locally linear graph embedding (LLE).*
- file [matfact.hpp](#)  
*Contains the implementation of an algorithm for embedding a network using matrix factorization. Reference: Koren, Y., Bell, R., and Volinsky, C. (2009). Matrix factorization techniques for recommender systems. Computer, 42(8):30–37 Ahmed, A., Shervashidze, N., Narayanamurthy, S., Josifovski, V., and Smola, A. J. (2013). Distributed large-scale natural graph factorization. In Proceedings of the 22nd International Conference on World Wide Web, WWW '13, pages 37–48, New York, NY, USA. Association for Computing Machinery.*
- file [matfactcg.hpp](#)  
*Contains the implementation of the optimization problem associated with matrix factorization.*
- file [node2vec.hpp](#)  
*A node2vec encoder.*
- file [graphalg.hpp](#)  
*Includes the headers related to graph algorithms.*
- file [dijkstra.hpp](#)  
*Contains an implementation of Dijkstra's algorithm.*
- file [netdistcalculator.hpp](#)  
*Contains the implementation of classes for computing distances in network.*
- file [shortestpaths.hpp](#)  
*Includes the headers related to shortest paths algorithms.*
- file [graphtraversal.hpp](#)  
*Contains the implementation of graph traversal algorithms.*
- file [traversal.hpp](#)  
*Includes the headers related to graph traversal algorithms.*

### 7.2.1 Detailed Description

This group contains graph algorithms.

## 7.3 Machine learning classes

This group contains classes related to supervised learning algorithms.

### Files

- file [classifier.hpp](#)  
*Contains the interface of a classifier.*
- file [classifiers.hpp](#)  
*Includes the headers related to classifiers.*
- file [ffn.hpp](#)  
*Contains a wrapper of `mlpack::ann::FFN` (feed-forward neural network).*
- file [linearsvm.hpp](#)  
*Contains a wrapper of `mlpack::smv::LinearSVM`.*
- file [logisticregresser.hpp](#)  
*Contains the implementation of a logistic regression algorithm.*
- file [logregcg.hpp](#)  
*Contains the implementation of a logistic regression optimization problem.*
- file [naivebayes.hpp](#)  
*Contains a wrapper of `mlpack::naive_bayes::NaiveBayesClassifier`.*
- file [rndclassifier.hpp](#)  
*Contains a random classifier (for debugging purposes).*
- file [ml.hpp](#)  
*Includes the headers related to learning-based predictors.*
- file [cosinesim.hpp](#)  
*Contains the implementation of cosine similarity.*
- file [dotprod.hpp](#)  
*Contains the implementation of the dot product similarity measure.*
- file [l1sim.hpp](#)  
*Contains the implementation of L1 similarity.*
- file [l2sim.hpp](#)  
*Contains the implementation of L2 similarity.*
- file [lpsim.hpp](#)  
*Contains the implementation of LP similarity.*
- file [pearson.hpp](#)  
*Contains the implementation of Pearson similarity.*
- file [simmeasure.hpp](#)  
*Contains the interface of a similarity measure.*
- file [simmeasures.hpp](#)  
*Includes the headers related to similarity measures.*

### 7.3.1 Detailed Description

This group contains classes related to supervised learning algorithms.

## 7.4 Numerical classes and algorithms

This group contains classes related to numerical data structures and algorithms.

### Files

- file [gfmatrix.hpp](#)  
*Contains the implementation of a full matrix.*
- file [vec.hpp](#)  
*Contains the implementation of a vector (in the sense of linear algebra).*
- file [logmdscg.hpp](#)  
*Contains the implementation of the optimization problem associated with multidimensional scaling using the logarithmic (MULTISCALE) loss function.*
- file [mds.hpp](#)  
*Contains the implementation of a solver of the multidimensional scaling problem using the logarithmic (MULTISCALE) loss function.*
- file [fastsig.hpp](#)  
*Contains the implementation of a fast sigmoid.*
- file [numerical.hpp](#)  
*Includes the headers related to numerical algorithms.*

### 7.4.1 Detailed Description

This group contains classes related to numerical data structures and algorithms.

## 7.5 Performance evaluation classes

This group contains classes related to performance evaluation.

### Files

- file [networkmanipulator.hpp](#)  
*Contains the implementation of test data related classes.*
- file [perf.hpp](#)  
*Includes the headers related to performance evaluation classes.*
- file [perfevaluator.hpp](#)  
*Includes the headers related to core classes.*
- file [perfmeasure.hpp](#)  
*Contains the implementation of several performance measures.*
- file [predresults.hpp](#)  
*Contains the implementation of a class to store and manage prediction results.*

### 7.5.1 Detailed Description

This group contains classes related to performance evaluation.

## 7.6 Link prediction algorithms

This group contains link prediction algorithms.

### Files

- file [dadapredictor.hpp](#)  
*Contains the implementation of a common neighbor link predictor.*
- file [dcnepredictor.hpp](#)  
*Contains the implementation of a common neighbor link predictor.*
- file [dhdipredictor.hpp](#)  
*Contains the implementation of a common neighbor link predictor.*
- file [dhpipredictor.hpp](#)  
*Contains the implementation of a common neighbor link predictor.*
- file [directed.hpp](#)  
*Includes the headers of link predictors for directed networks.*
- file [djidpredictor.hpp](#)  
*Contains the implementation of a common neighbor link predictor.*
- file [dlcppredictor.hpp](#)  
*Contains the implementation of a directed LCP link predictor.*
- file [dlhnpredictor.hpp](#)  
*Contains the implementation of a common neighbor link predictor.*
- file [dlpredictor.hpp](#)  
*Contains the interface of a link predictor.*
- file [dpatpredictor.hpp](#)  
*Contains the implementation of a common neighbor link predictor.*
- file [dpstpredictor.hpp](#)  
*Contains the implementation of a link predictor that prestores the scores of edges.*
- file [dsaipredictor.hpp](#)  
*Contains the implementation of a common neighbor link predictor.*
- file [dsoipredictor.hpp](#)  
*Contains the implementation of a common neighbor link predictor.*
- file [predictors.hpp](#)  
*Includes the headers of link predictors.*
- file [uadapredictor.hpp](#)  
*Contains the implementation of an Adamic Adar index link predictor.*
- file [ucnepredictor.hpp](#)  
*Contains the implementation of a common neighbor link predictor.*
- file [ucrapredictor.hpp](#)  
*Contains the implementation of the Cannistraci Resource Allocation link predictor.*
- file [ucstpredictor.hpp](#)  
*Contains the implementation of a constant link predictor.*
- file [ueclpredictor.hpp](#)  
*Contains the implementation of an encoder-classifier link predictor.*
- file [uesmpredictor.hpp](#)  
*Contains the implementation of an encoder-similarity measure link predictor.*
- file [ufbmpredictor.hpp](#)  
*Contains the implementation of the fast blocking model link predictor.*
- file [uhdipredictor.hpp](#)

- Contains the implementation of a hub depromoted index link predictor.*
- file [uhpipredictor.hpp](#)
  - Contains the implementation of a hub promoted index link predictor.*
- file [uhrgpredictor.hpp](#)
  - Contains the implementation of the HRG link predictor.*
- file [uhyppredictor.hpp](#)
  - Contains the implementation of the hypermap link predictor.*
- file [ujidpredictor.hpp](#)
  - Contains the implementation of a Jackard index link predictor.*
- file [ukabpredictor.hpp](#)
  - Contains the implementation of a scalable popularity-similarity link predictor.*
- file [ulcppredictor.hpp](#)
  - Contains the implementation of a local path link predictor.*
- file [ulhnpredictor.hpp](#)
  - Contains the implementation of a Leicht-Holme-Newman index link predictor.*
- file [ulpredictor.hpp](#)
  - Contains the interface of a link predictor.*
- file [umspredictor.hpp](#)
  - Contains the implementation of a scalable popularity similarity link predictor.*
- file [undirected.hpp](#)
  - Includes the headers of link predictors for undirected networks.*
- file [unedpredictor.hpp](#)
  - Contains the implementation of a link prediction algorithm based on the degrees of neighbors.*
- file [upatpredictor.hpp](#)
  - Contains the implementation of a preferential attachment link predictor.*
- file [upstpredictor.hpp](#)
  - Contains the implementation of a link predictor that prestores the scores of edges.*
- file [uralpredictor.hpp](#)
  - Contains the implementation of a resource allocation link predictor.*
- file [urndpredictor.hpp](#)
  - Contains the implementation of a random link predictor.*
- file [usaipredictor.hpp](#)
  - Contains the implementation of a Salton index link predictor.*
- file [usbmpredictor.hpp](#)
  - Contains the implementation of the stochastic block model link predictor.*
- file [ushppredictor.hpp](#)
  - Contains the implementation of a shortest path link predictor.*
- file [usoipredictor.hpp](#)
  - Contains the implementation of a Sorensen index link predictor.*
- file [usumpredictor.hpp](#)
  - Contains the implementation of a sum-of-degrees link predictor.*

### 7.6.1 Detailed Description

This group contains link prediction algorithms.

## 7.7 Simplified interface

This group contains a simplified interface for [LinkPred](#) that includes the essential functionalities.

### Files

- file [edgescore.hpp](#)  
*Contains the definition of a structure to store the score of an edge.*
- file [evaluator.hpp](#)  
*Contains the definition of a class that simplifies the evaluation of link prediction algorithms.*
- file [perfres.hpp](#)  
*Contains the definition of a structure to store performance results.*
- file [predictor.hpp](#)  
*Contains the definition of a class that simplifies the use of link prediction algorithms.*
- file [simp.hpp](#)  
*Includes all headers of the essential interface.*

### 7.7.1 Detailed Description

This group contains a simplified interface for [LinkPred](#) that includes the essential functionalities.



## 7.8 Utility functions and classes

This group contains various utility functions and classes.

### Files

- file [log.hpp](#)  
*Contains the implementation of a log class.*
- file [loglevel.hpp](#)  
*Contains the definition of log levels.*
- file [miscutils.hpp](#)  
*Contains the implementation of miscellaneous useful methods.*
- file [randomgen.hpp](#)  
*Contains the implementation of a random number generator.*
- file [utils.hpp](#)  
*Includes the headers related to utility classes.*

### 7.8.1 Detailed Description

This group contains various utility functions and classes.



## Chapter 8

# Namespace Documentation

### 8.1 LinkPred Namespace Reference

Main namespace.

#### Namespaces

- [Simp](#)  
*Simplified interface. Contains a simplified interface for [LinkPred](#) that includes the essential functionalities.*
- [Utils](#)  
*Some utility functions.*

#### Classes

- class [ASPDistCalculator](#)  
*Approximate shortest path distance calculator.*
- class [ASPDsimCalculator](#)  
*Approximate shortest path dissimilarity calculator.*
- class [BFS](#)  
*[BFS](#) graph traversal.*
- class [BHeap](#)  
*A binary heap.*
- class [Bhmap](#)  
*A bidirectional half map.*
- class [Classifier](#)  
*Interface of a binary classifier.*
- class [Collector](#)  
*A class that collects nodes during traversal.*
- class [CosineSim](#)  
*Cosine similarity.*
- class [Counter](#)  
*A class that counts nodes during traversal.*
- class [DADAPredictor](#)  
*Common neighbor link predictor adapted to directed networks.*

- class [DCNEPredictor](#)  
*Common neighbor link predictor adapted to directed networks.*
- class [DeepWalk](#)  
*DeepWalk encoder. Reference: Perozzi, B., Al-Rfou, R., and Skiena, S. (2014). Deepwalk: Online learning of social representations. In Proceedings of the 20th ACM SIGKDD International Conference on Knowledge Discovery and Data Mining, KDD '14, pages 701–710, New York, NY, USA. Association for Computing Machinery. This implementation is based on the code <https://github.com/xgfs/deepwalk-c>.*
- class [DESPLDistCalculator](#)  
*Exact shortest path distance calculator on a directed network with limits on the number of hops.*
- class [DFS](#)  
*DFS graph traversal.*
- class [DHDIPredictor](#)  
*Common neighbor link predictor adapted to directed networks.*
- class [DHPIPredictor](#)  
*Common neighbor link predictor adapted to directed networks.*
- class [Dijkstra](#)  
*An implementation of [Dijkstra's](#) algorithm.*
- class [DJIDPredictor](#)  
*Common neighbor link predictor adapted to directed networks.*
- class [DLCPPredictor](#)  
*Common neighbor link predictor adapted to directed networks.*
- class [DLHNPredictor](#)  
*Common neighbor link predictor adapted to directed networks.*
- class [DLPredictor](#)  
*The interface of a link predictor in a directed network.*
- class [DNetwork](#)  
*This class represents a directed network in the sense of graph theory.*
- class [DotProd](#)  
*A simple dot product similarity measure.*
- class [DPATPredictor](#)  
*Common neighbor link predictor adapted to directed networks.*
- class [DPSTPredictor](#)  
*A link predictor that prestores edge scores. This allows to seemingly integrate results from external link prediction algorithms to [LinkPred](#) (for example, users may implement their own link prediction algorithm and then use this link predictor to use compare their results to algorithms available in [LinkPred](#)).*
- class [DSAIPredictor](#)  
*Common neighbor link predictor adapted to directed networks.*
- class [DSOIPredictor](#)  
*Common neighbor link predictor adapted to directed networks.*
- class [Encoder](#)  
*The interface of a network encoder.*
- class [ESPDistCalculator](#)  
*Exact shortest path distance calculator.*
- class [ESPDsimCalculator](#)  
*Exact shortest path dissimilarity calculator.*
- class [ESPIndSimlCalculator](#)  
*Exact shortest path distance calculator.*
- class [ESPLDistCalculator](#)  
*Exact shortest path distance calculator with limits on the number of hops.*
- class [ESPLSimlCalculator](#)  
*Exact shortest path distance calculator.*
- class [ESPSimlCalculator](#)

- Exact shortest path distance calculator.*
- class [FastSig](#)
  - A fast sigmoid.*
- class [GCurve](#)
  - General performance curve.*
- class [GFMatrix](#)
  - Generalized full matrix. The storage scheme used is column-major.*
- class [GraphTraversal](#)
  - Graph traversal interface.*
- class [HMSM](#)
  - Contains the implementation of an algorithm for embedding a network using a hidden metric space model. Reference: R. Alharbi, H. Benhidour, and S. Kerrache. "Link Prediction in Complex Networks Based on a Hidden Variables Model". In: 2016 UKSim-AMSS 18th International Conference on Computer Modelling and Simulation (UKSim). 2016, pages 119–124.*
- class [L1Sim](#)
  - L1 similarity (negative the L1 norm or Manhattan distance).*
- class [L2Sim](#)
  - L2 similarity (negative the Euclidean distance).*
- class [LargeVis](#)
  - [LargeVis](#) encoder. Reference: Tang, J., Liu, J., Zhang, M., and Mei, Q. (2016b). Visualizing large-scale and high-dimensional data. In Bourdeau, J., Hendler, J., Nkambou, R., Horrocks, I., and Zhao, B. Y., editors, WWW, pages 287–297. ACM. This implementation is based on the code <https://github.com/lferry007/LargeVis>.*
- class [LINE](#)
  - [LINE](#) encoder.*
- class [LMapQueue](#)
  - A map-priority queue with limit on the capacity.*
- class [Log](#)
  - A log class.*
- class [LogisticRegresser](#)
  - Logistic regression algorithm.*
- class [LogMDSCG](#)
  - Optimization problem associated with multidimensional scaling using the logarithmic (MULTISCALE) loss function.*
- class [LogRegCG](#)
  - Logistic regression optimization problem.*
- class [LPSim](#)
  - LP similarity (negative the Lp norm).*
- class [MatFact](#)
  - Contains the implementation of an algorithm for embedding a network using matrix factorization. Reference: Koren, Y., Bell, R., and Volinsky, C. (2009). Matrix factorization techniques for recommender systems. Computer, 42(8):30–37 Ahmed, A., Shervashidze, N., Narayanamurthy, S., Josifovski, V., and Smola, A. J. (2013). Distributed large-scale natural graph factorization. In Proceedings of the 22nd International Conference on World Wide Web, WWW '13, pages 37–48, New York, NY, USA. Association for Computing Machinery.*
- class [MatFactCG](#)
  - Optimization problem associated with matrix factorization.*
- struct [MatFactPbData](#)
  - A simple structure to store matrix factorization problem data.*
- class [MDS](#)
  - Solve the [MDS](#) problem.*
- class [NetDistCalculator](#)
  - Interface for calculating the distance between nodes in a network.*
- class [NetIndSimiCalculator](#)
  - Interface for calculating the indirect similarity between nodes in a network.*
- class [NetSimiCalculator](#)

- Interface for calculating the similarity between nodes in a network.*

  - class [NetworkManipulator](#)

*Class to manipulate network by removing or adding edges.*
  - class [Node2Vec](#)

*Node2Vec encoder. References: Grover, A. and Leskovec, J. (2016). Node2vec: Scalable feature learning for networks. In Proceedings of the 22nd ACM SIGKDD International Conference on Knowledge Discovery and Data Mining, KDD'16, pages 855–864, New York, NY, USA. Association for Computing Machinery. This implementation is based on the code <https://github.com/xgfs/node2vec-c>.*
  - class [Pearson](#)

*Pearson similarity (Pearson correlation coefficient).*
  - class [PEFactory](#)

*Factory class to create link predictors and performance measures.*
  - class [PerfCurve](#)

*Abstract performance curve.*
  - struct [PerfEvalExpDescp](#)

*Structure storing experiment description.*
  - class [PerfEvalExp](#)

*Performance evaluation experiment.*
  - class [PerfEvaluator](#)

*Performance evaluator.*
  - class [PerfMeasure](#)

*Abstract performance measure.*
  - class [PR](#)

*The precision recall curve.*
  - class [PredResults](#)

*A class to store and manage prediction results.*
  - class [RandomGen](#)

*A random number generator.*
  - class [RndClassifier](#)

*Random classifier.*
  - class [ROC](#)

*Receiver Operating Characteristic curve.*
  - class [SimMeasure](#)

*Interface of a similarity measure.*
  - class [TestData](#)

*Test data.*
  - class [TestEdgeGen](#)

*Generate true positives and true negatives.*
  - class [TPR](#)

*Compute top precision.*
  - class [UADAPredictor](#)

*Adamic Adar index link predictor.*
  - class [UCNEPredictor](#)

*Common neighbor link predictor.*
  - class [UCRAPredictor](#)

*Local path link predictor.*
  - class [UCSTPredictor](#)

*Constant link predictor.*
  - class [UECLPredictor](#)

*Encoder-classifier link predictor.*
  - class [UESMPredictor](#)

- Encoder-Similarity measure link predictor.*
- class [UFBMPredictor](#)
  - Fast blocking model link predictor.*
- class [UHDIPredictor](#)
  - Hub depromoted index link predictor.*
- class [UHPIPredictor](#)
  - Hub promoted index link predictor.*
- class [UHRGPredictor](#)
  - HRG predictor.*
- class [UHYPPredictor](#)
  - Hypermap predictor.*
- class [UJIDPredictor](#)
  - Jackard index link predictor.*
- class [UKABPredictor](#)
  - A scalable popularity similarity link predictor proposed in: "Kerrache, S., Alharbi, R. & Benhidour, H. A Scalable Similarity-Popularity Link Prediction Method. Sci Rep 10, 6394 (2020)". <https://doi.org/10.1038/s41598-020-62636-1>.*
- class [ULCPPredictor](#)
  - Local path link predictor.*
- class [ULHNPredictor](#)
  - Leicht-Holme-Newman index link predictor.*
- class [ULPredictor](#)
  - The interface of a link predictor in an undirected network.*
- class [UMPSPredictor](#)
  - A scalable popularity similarity link predictor.*
- class [UNEDPredictor](#)
  - A neighbors degree link predictor.*
- class [UNetwork](#)
  - This class represents an undirected network in the sense of graph theory.*
- class [UPATPredictor](#)
  - A preferential attachment link predictor.*
- class [UPSTPredictor](#)
  - A link predictor that prestores edge scores. This allows to seemingly integrate results from external link prediction algorithms to [LinkPred](#) (for example, users may implement their own link prediction algorithm and then use this link predictor to use compare their results to algorithms available in [LinkPred](#)).*
- class [URALPredictor](#)
  - A resource allocation link predictor.*
- class [URNDPredictor](#)
  - A random link predictor.*
- class [USAIPredictor](#)
  - A Salton index link predictor.*
- class [USBMPredictor](#)
  - The stochastic block model link predictor.*
- class [USHPPredictor](#)
  - A shortest path link predictor link predictor.*
- class [USOIPredictor](#)
  - A Sorensen index link predictor.*
- class [USUMPredictor](#)
  - A sum-of-degrees link predictor.*
- class [Vec](#)
  - This class represent a vector (in the sense of linear algebra).*

## Typedefs

- using [PerfResults](#) = std::map< std::string, double >

## Enumerations

- enum [CacheLevel](#) { [NoCache](#), [NodeCache](#), [NetworkCache](#) }  
*Cache levels.*
- enum [MDSAlg](#) { [IpoptMDS](#), [CGMDS](#) }  
*MDS solution methods.*
- enum [LinkClass](#) { [TP](#), [FN](#), [FP](#), [TN](#) }  
*Enumeration of all classes of links.*
- enum [LogLevel](#) {  
  [logError](#), [logWarning](#), [logInfo](#), [logDebug](#),  
  [logDebug1](#), [logDebug2](#), [logDebug3](#) }  
*Enumeration of log levels.*
- enum [SortOrder](#) { [None](#), [Inc](#), [Dec](#) }  
*Enumeration of different sorting orders.*

## Functions

- [Vec operator+](#) ([Vec](#) const &v1, [Vec](#) const &v2)
- [Vec operator-](#) ([Vec](#) const &v1, [Vec](#) const &v2)
- [Vec operator\\*](#) ([Vec](#) const &v1, [Vec](#) const &v2)
- [Vec operator/](#) ([Vec](#) const &v1, [Vec](#) const &v2)
- [Vec operator+](#) (double a, [Vec](#) const &v)
- [Vec operator-](#) (double a, [Vec](#) const &v)
- [Vec operator\\*](#) (double a, [Vec](#) const &v)
- [Vec operator/](#) (double a, [Vec](#) const &v)
- [Vec operator+](#) ([Vec](#) const &v, double a)
- [Vec operator-](#) ([Vec](#) const &v, double a)
- [Vec operator\\*](#) ([Vec](#) const &v, double a)
- [Vec operator/](#) ([Vec](#) const &v, double a)
- double [operator^](#) ([Vec](#) const &v1, [Vec](#) const &v2)

## Variables

- constexpr double [MathPI](#) = 3.141592653589793238462643383279502884L

### 8.1.1 Detailed Description

Main namespace.

The main namespace of the library.

### 8.1.2 Typedef Documentation



### 8.1.2.1 PerfResults

```
using LinkPred::PerfResults = typedef std::map<std::string, double>
```

Map of performance results. Performance results are stored in a map, with the key being the identifier of the performance measure and the data being the value.

## 8.1.3 Enumeration Type Documentation

### 8.1.3.1 CacheLevel

```
enum LinkPred::CacheLevel
```

Cache levels.

Enumerator

|              |                         |
|--------------|-------------------------|
| NoCache      | No cache.               |
| NodeCache    | Cache at node level.    |
| NetworkCache | Cache at network level. |

### 8.1.3.2 LinkClass

```
enum LinkPred::LinkClass
```

Enumeration of all classes of links.

Enumerator

|    |                      |
|----|----------------------|
| TP | True positive link.  |
| FN | False negative link. |
| FP | False positive link. |
| TN | True negative link.  |

### 8.1.3.3 LogLevel

```
enum LinkPred::LogLevel
```

Enumeration of log levels.

**Enumerator**

|            |                                             |
|------------|---------------------------------------------|
| logError   | At this level, only errors are reported.    |
| logWarning | Warnings are included at this level.        |
| logInfo    | Running information included at this level. |
| logDebug   | Debug level.                                |
| logDebug1  | Debug level 1.                              |
| logDebug2  | Debug level 2.                              |
| logDebug3  | Debug level 3.                              |

**8.1.3.4 MDSAAlg**

enum `LinkPred::MDSAAlg`

**MDS** solution methods.

**Enumerator**

|          |                                          |
|----------|------------------------------------------|
| lpoptMDS | Solution using lpopt.                    |
| CGMDS    | Solution using the CG Descent algorithm. |

**8.1.3.5 SortOrder**

enum `LinkPred::SortOrder`

Enumeration of different sorting orders.

**Enumerator**

|      |                             |
|------|-----------------------------|
| None | Not sorted.                 |
| Inc  | Sorted in increasing order. |
| Dec  | Sorted in decreasing order. |

**8.1.4 Function Documentation****8.1.4.1 operator\*() [1/3]**

```
Vec LinkPred::operator* (
    double a,
    Vec const & v )
```

Scalar-vector multiplication.

**Parameters**

|          |             |
|----------|-------------|
| <i>a</i> | The scalar. |
| <i>v</i> | The vector. |

**Returns**

$a * v$ .

**8.1.4.2 operator\*() [2/3]**

```
Vec LinkPred::operator* (
    Vec const & v,
    double a )
```

Vector-scalar multiplication.

**Parameters**

|          |             |
|----------|-------------|
| <i>v</i> | The vector. |
| <i>a</i> | The scalar. |

**Returns**

$v * a$ .

**8.1.4.3 operator\*() [3/3]**

```
Vec LinkPred::operator* (
    Vec const & v1,
    Vec const & v2 )
```

Vector element-wise multiplication.

**Parameters**

|           |                    |
|-----------|--------------------|
| <i>v1</i> | The first vector.  |
| <i>v2</i> | The second vector. |

**Returns**

$v1 .* v2$ .

#### 8.1.4.4 operator+() [1/3]

```
Vec LinkPred::operator+ (
    double a,
    Vec const & v )
```

Scalar-vector addition.

##### Parameters

|          |             |
|----------|-------------|
| <i>a</i> | The scalar. |
| <i>v</i> | The vector. |

##### Returns

$a + v$ .

#### 8.1.4.5 operator+() [2/3]

```
Vec LinkPred::operator+ (
    Vec const & v,
    double a )
```

Vector-scalar addition.

##### Parameters

|          |             |
|----------|-------------|
| <i>v</i> | The vector. |
| <i>a</i> | The scalar. |

##### Returns

$v + a$ .

#### 8.1.4.6 operator+() [3/3]

```
Vec LinkPred::operator+ (
    Vec const & v1,
    Vec const & v2 )
```

Vector addition.

##### Parameters

|           |                    |
|-----------|--------------------|
| <i>v1</i> | The first vector.  |
| <i>v2</i> | The second vector. |

**Returns**

$v1 + v2$ .

**8.1.4.7 operator-() [1/3]**

```
Vec LinkPred::operator- (
    double a,
    Vec const & v )
```

Scalar-vector subtraction.

**Parameters**

|     |             |
|-----|-------------|
| $a$ | The scalar. |
| $v$ | The vector. |

**Returns**

$a - v$ .

**8.1.4.8 operator-() [2/3]**

```
Vec LinkPred::operator- (
    Vec const & v,
    double a )
```

Vector-scalar subtraction.

**Parameters**

|     |             |
|-----|-------------|
| $v$ | The vector. |
| $a$ | The scalar. |

**Returns**

$v - a$ .

**8.1.4.9 operator-() [3/3]**

```
Vec LinkPred::operator- (
    Vec const & v1,
    Vec const & v2 )
```

Vector subtraction.

**Parameters**

|           |                    |
|-----------|--------------------|
| <i>v1</i> | The first vector.  |
| <i>v2</i> | The second vector. |

**Returns**

$v1 - v2$ .

**8.1.4.10 operator/() [1/3]**

```
Vec LinkPred::operator/ (
    double a,
    Vec const & v )
```

Scalar-vector division.

**Parameters**

|          |             |
|----------|-------------|
| <i>a</i> | The scalar. |
| <i>v</i> | The vector. |

**Returns**

$a / v$ .

**8.1.4.11 operator/() [2/3]**

```
Vec LinkPred::operator/ (
    Vec const & v,
    double a )
```

Vector-scalar division.

**Parameters**

|          |             |
|----------|-------------|
| <i>v</i> | The vector. |
| <i>a</i> | The scalar. |

**Returns**

$v / a$ .

**8.1.4.12 operator/()** [3/3]

```
Vec LinkPred::operator/ (
    Vec const & v1,
    Vec const & v2 )
```

Vector element-wise division.

**Parameters**

|           |                    |
|-----------|--------------------|
| <i>v1</i> | The first vector.  |
| <i>v2</i> | The second vector. |

**Returns**

$v1 ./ v2$ .

**8.1.4.13 operator^()**

```
double LinkPred::operator^ (
    Vec const & v1,
    Vec const & v2 )
```

Dot product.

**Parameters**

|           |                    |
|-----------|--------------------|
| <i>v1</i> | The first vector.  |
| <i>v2</i> | The second vector. |

**Returns**

$v1' * v2$ .

**8.1.5 Variable Documentation****8.1.5.1 MathPI**

```
constexpr double LinkPred::MathPI = 3.141592653589793238462643383279502884L [constexpr]
```

Pi.



## 8.2 LinkPred::Simp Namespace Reference

Simplified interface. Contains a simplified interface for [LinkPred](#) that includes the essential functionalities.

### Classes

- struct [EdgeScore](#)  
*A structure to store the score of an edge.*
- struct [EdgeScoreByID](#)  
*A structure to store the score of an edge. The node IDs are used instead of labels.*
- class [Evaluator](#)  
*A class that simplifies the evaluation of link prediction algorithms.*
- struct [PerfRes](#)  
*A structure to store performance results.*
- class [Predictor](#)  
*A class that simplifies the use of link prediction algorithms.*

### 8.2.1 Detailed Description

Simplified interface. Contains a simplified interface for [LinkPred](#) that includes the essential functionalities.

## 8.3 LinkPred::Utils Namespace Reference

Some utility functions.

### Classes

- struct [EdgeScore](#)  
*A structure to store the score of an edge.*
- struct [PairCompRight](#)  
*Class for comparing pairs based on second elements only.*

### Functions

- `std::string & ltrim (std::string &str, const char *spaces=" \t\n\r\f\v")`
- `std::string & rtrim (std::string &str, const char *spaces=" \t\n\r\f\v")`
- `std::string & trim (std::string &str, const char *spaces=" \t\n\r\f\v")`
- `template<typename T >  
void clear (std::queue< T > &q)`
- `template<typename IteratorT >  
void sort (IteratorT begin, IteratorT end, SortOrder sortOrder)`
- `std::vector< std::size_t > getRndPerm (std::size_t n)`
- `std::vector< std::size_t > getRndPerm (std::size_t n, long int seed)`
- `std::pair< double, double > pIFit (std::vector< std::size_t > const &data)`
- `std::pair< double, double > pIFit (std::vector< double > const &data)`

- `template<typename T >`  
`void print (std::vector< T > const &v, std::string name)`
- `template<typename U , typename V >`  
`std::pair< V, U > flip (const std::pair< U, V > &p)`
- `template<typename U , typename V >`  
`std::multimap< V, U > flipMap (const std::map< U, V > &map)`
- `template<typename RandomIterator >`  
`std::set< typename std::iterator_traits< RandomIterator >::value_type > selectRandom (RandomIterator begin, RandomIterator end, std::size_t k, long int seed)`
- `template<typename RandomIterator >`  
`void selectRandomInPlace (RandomIterator begin, RandomIterator end, std::size_t k, long int seed)`
- `template<typename T , typename InputIterator , typename InsertIter , typename Compare >`  
`void selectTopK (InputIterator begin, InputIterator end, InsertIter inserter, std::size_t k)`
- `template<typename RandomIterator >`  
`RandomIterator getRandom (RandomIterator begin, RandomIterator end, long int seed)`
- `template<typename T , typename InputIterator , typename InsertIter >`  
`void filter (InputIterator begin, InputIterator end, std::set< T > const &excepts, InsertIter inserter)`
- `template<typename InputIterator >`  
`void print (InputIterator begin, InputIterator end, std::string const &title, std::ostream &out)`
- `template<typename InputIterator >`  
`void print (InputIterator begin, InputIterator end, std::string const &title)`
- `template<typename InputIterator , typename Network >`  
`void printEdges (InputIterator begin, InputIterator end, Network const &net, std::string const &title, std::ostream &out)`
- `template<typename InputIterator , typename Network >`  
`void printEdges (InputIterator begin, InputIterator end, Network const &net, std::string const &title)`
- `template<typename InputIterator >`  
`double norm (InputIterator begin, InputIterator end)`
- `int int_cast (std::size_t source)`
- `template<typename InputIterator >`  
`void assertNoNaN (InputIterator begin, InputIterator end)`
- `std::pair< std::size_t, std::size_t > localRange (std::size_t n, int nbProcs, int proclD)`
- `template<typename RandomIterator >`  
`void shuffle (RandomIterator begin, RandomIterator end, long int seed)`
- `template<typename Label = std::string>`  
`std::vector< std::pair< Label, Label > > readEdges (std::string fileName, bool ignoreLoops=true)`
- `template<typename Label = std::string>`  
`std::vector< EdgeScore< Label > > readEdgeScores (std::string fileName)`
- `template<typename Label = std::string>`  
`void writeEdgeScores (std::string fileName, std::vector< EdgeScore< Label > > const &esv)`

### 8.3.1 Detailed Description

Some utility functions.

### 8.3.2 Function Documentation

### 8.3.2.1 assertNoNaN()

```
template<typename InputIterator >
void LinkPred::Utils::assertNoNaN (
    InputIterator begin,
    InputIterator end )
```

Check for NaN and throws exception if it finds it.

### 8.3.2.2 clear()

```
template<typename T >
void LinkPred::Utils::clear (
    std::queue< T > & q )
```

Clear the queue (q becomes empty after the call).

#### Template Parameters

|          |                                    |
|----------|------------------------------------|
| <i>T</i> | the data type stored in the queue. |
|----------|------------------------------------|

#### Parameters

|          |            |
|----------|------------|
| <i>q</i> | The queue. |
|----------|------------|

### 8.3.2.3 filter()

```
template<typename T , typename InputIterator , typename InserterIt >
void LinkPred::Utils::filter (
    InputIterator begin,
    InputIterator end,
    std::set< T > const & excepts,
    InserterIt inserter )
```

Filter a range.

### 8.3.2.4 flip()

```
template<typename U , typename V >
std::pair<V, U> LinkPred::Utils::flip (
    const std::pair< U, V > & p )
```

Flip a pair.

#### Parameters

|          |                    |
|----------|--------------------|
| <i>p</i> | The original pair. |
|----------|--------------------|

**Returns**

The flipped pair.

**8.3.2.5 flipMap()**

```
template<typename U , typename V >
std::multimap<V, U> LinkPred::Utils::flipMap (
    const std::map< U, V > & map )
```

Flip a map.

**Parameters**

|            |                   |
|------------|-------------------|
| <i>map</i> | The original map. |
|------------|-------------------|

**Returns**

The flipped map.

**8.3.2.6 getRandom()**

```
template<typename RandomIterator >
RandomIterator LinkPred::Utils::getRandom (
    RandomIterator begin,
    RandomIterator end,
    long int seed )
```

Select a random element from a range.

**8.3.2.7 getRndPerm() [1/2]**

```
std::vector<std::size_t> LinkPred::Utils::getRndPerm (
    std::size_t n )
```

**Parameters**

|          |                          |
|----------|--------------------------|
| <i>n</i> | Size of the permutation. |
|----------|--------------------------|

**Returns**

A vector containing a random permutation of [0..n-1].

### 8.3.2.8 getRndPerm() [2/2]

```
std::vector<std::size_t> LinkPred::Utils::getRndPerm (
    std::size_t n,
    long int seed )
```

#### Parameters

|             |                          |
|-------------|--------------------------|
| <i>n</i>    | Size of the permutation. |
| <i>seed</i> | The seed.                |

#### Returns

A vector containing a random permutation of [0..n-1].

### 8.3.2.9 int\_cast()

```
int LinkPred::Utils::int_cast (
    std::size_t source ) [inline]
```

Controlled numerical cast.

### 8.3.2.10 localRange()

```
std::pair<std::size_t, std::size_t> LinkPred::Utils::localRange (
    std::size_t n,
    int nbProcs,
    int procID )
```

Compute local range in a distributed setting.

#### Parameters

|                |                       |
|----------------|-----------------------|
| <i>n</i>       | Total range size.     |
| <i>nbProcs</i> | Number of processors. |
| <i>procID</i>  | The processor ID.     |

#### Returns

Pair containing start and end of the range (end is not included in the range).

### 8.3.2.11 ltrim()

```
std::string& LinkPred::Utils::ltrim (
    std::string & str,
    const char * spaces = " \t\n\r\f\v" ) [inline]
```

Trim the string from left.

#### Parameters

|               |                 |
|---------------|-----------------|
| <i>str</i>    | Input string.   |
| <i>spaces</i> | List of spaces. |

#### 8.3.2.12 norm()

```
template<typename InputIterator >
double LinkPred::Utils::norm (
    InputIterator begin,
    InputIterator end )
```

#### Returns

The norm of a range.

#### 8.3.2.13 plFit() [1/2]

```
std::pair<double, double> LinkPred::Utils::plFit (
    std::vector< double > const & data )
```

Fit a continuous power law.

#### Parameters

|             |                        |
|-------------|------------------------|
| <i>data</i> | The data to be fitted. |
|-------------|------------------------|

#### Returns

A pair containing respectively, the power of the power law and the minimum value.

#### 8.3.2.14 plFit() [2/2]

```
std::pair<double, double> LinkPred::Utils::plFit (
    std::vector< std::size_t > const & data )
```

Fit a discrete power law.

## Parameters

|             |                        |
|-------------|------------------------|
| <i>data</i> | The data to be fitted. |
|-------------|------------------------|

## Returns

A pair containing respectively, the power of the power law and the minimum value.

**8.3.2.15 print()** [1/3]

```
template<typename InputIterator >
void LinkPred::Utils::print (
    InputIterator begin,
    InputIterator end,
    std::string const & title )
```

Print data.

**8.3.2.16 print()** [2/3]

```
template<typename InputIterator >
void LinkPred::Utils::print (
    InputIterator begin,
    InputIterator end,
    std::string const & title,
    std::ostream & out )
```

Print data.

**8.3.2.17 print()** [3/3]

```
template<typename T >
void LinkPred::Utils::print (
    std::vector< T > const & v,
    std::string name )
```

Print vector to standard output.

## Parameters

|             |                               |
|-------------|-------------------------------|
| <i>v</i>    | The vector.                   |
| <i>name</i> | String prefixed to the print. |

**8.3.2.18 printEdges() [1/2]**

```
template<typename InputIterator , typename Network >
void LinkPred::Utils::printEdges (
    InputIterator begin,
    InputIterator end,
    Network const & net,
    std::string const & title )
```

Print edges.

**8.3.2.19 printEdges() [2/2]**

```
template<typename InputIterator , typename Network >
void LinkPred::Utils::printEdges (
    InputIterator begin,
    InputIterator end,
    Network const & net,
    std::string const & title,
    std::ostream & out )
```

Print edges.

**8.3.2.20 readEdges()**

```
template<typename Label = std::string>
std::vector<std::pair<Label, Label> > LinkPred::Utils::readEdges (
    std::string fileName,
    bool ignoreLoops = true )
```

Read edges from file.

**Parameters**

|                    |                                                          |
|--------------------|----------------------------------------------------------|
| <i>fileName</i>    | The file containing the edges.                           |
| <i>ignoreLoops</i> | Whether to ignore loops (an edge from a node to itself). |

**Returns**

A vector containing the edge represented as `std::pair`.

**8.3.2.21 readEdgeScores()**

```
template<typename Label = std::string>
std::vector<EdgeScore<Label> > LinkPred::Utils::readEdgeScores (
    std::string fileName )
```

Read edges and their scores from file.



## Parameters

|                 |                                                 |
|-----------------|-------------------------------------------------|
| <i>fileName</i> | The file containing the edges and their scores. |
|-----------------|-------------------------------------------------|

## Returns

A vector containing the edges with their scores.

**8.3.2.22 rtrim()**

```
std::string& LinkPred::Utils::rtrim (
    std::string & str,
    const char * spaces = " \t\n\r\f\v" ) [inline]
```

Trim the string from right.

## Parameters

|               |                 |
|---------------|-----------------|
| <i>str</i>    | Input string.   |
| <i>spaces</i> | List of spaces. |

**8.3.2.23 selectRandom()**

```
template<typename RandomIterator >
std::set< typename std::iterator_traits<RandomIterator>::value_type> LinkPred::Utils::selectRandom (
    RandomIterator begin,
    RandomIterator end,
    std::size_t k,
    long int seed )
```

Randomly select k elements without repetition using Floyd's selection algorithm.

## Parameters

|              |                                                                                                                   |
|--------------|-------------------------------------------------------------------------------------------------------------------|
| <i>begin</i> | Iterator pointing to the start of elements.                                                                       |
| <i>end</i>   | Iterator pointing to the end of elements.                                                                         |
| <i>k</i>     | The number of elements to select. If k is larger than the actual number of elements, std::out_of_range is thrown. |
| <i>seed</i>  | Seed for the random number generator.                                                                             |

**8.3.2.24 selectRandomInPlace()**

```
template<typename RandomIterator >
void LinkPred::Utils::selectRandomInPlace (
    RandomIterator begin,
    RandomIterator end,
    std::size_t k,
    long int seed )
```

Randomly select *k* elements without repetition using Floyd's selection algorithm. The selected elements are put at the end of the range.

**Parameters**

|              |                                                                                                                                       |
|--------------|---------------------------------------------------------------------------------------------------------------------------------------|
| <i>begin</i> | Iterator pointing to the start of elements.                                                                                           |
| <i>end</i>   | Iterator pointing to the end of elements.                                                                                             |
| <i>k</i>     | The number of elements to select. If <i>k</i> is larger than the actual number of elements, <code>std::out_of_range</code> is thrown. |
| <i>seed</i>  | Seed for the random number generator.                                                                                                 |

**8.3.2.25 selectTopK()**

```
template<typename T , typename InputIterator , typename InserterIt , typename Compare >
void LinkPred::Utils::selectTopK (
    InputIterator begin,
    InputIterator end,
    InserterIt inserter,
    std::size_t k )
```

Randomly select *k* largest or smallest elements.

**Parameters**

|                 |                                                                                                                                       |
|-----------------|---------------------------------------------------------------------------------------------------------------------------------------|
| <i>begin</i>    | Iterator pointing to the start of elements.                                                                                           |
| <i>end</i>      | Iterator pointing to the end of elements.                                                                                             |
| <i>inserter</i> | An inserter iterator where the selected elements will be inserted.                                                                    |
| <i>k</i>        | The number of elements to select. If <i>k</i> is larger than the actual number of elements, <code>std::out_of_range</code> is thrown. |

**8.3.2.26 shuffle()**

```
template<typename RandomIterator >
void LinkPred::Utils::shuffle (
    RandomIterator begin,
    RandomIterator end,
    long int seed )
```

Randomly shuffle a range.

### 8.3.2.27 sort()

```
template<typename IteratorT >
void LinkPred::Utils::sort (
    IteratorT begin,
    IteratorT end,
    SortOrder sortOrder )
```

Sort a range.

#### Template Parameters

|                  |                    |
|------------------|--------------------|
| <i>T</i>         | The data type.     |
| <i>IteratorT</i> | The iterator type. |

#### Parameters

|                  |                                                     |
|------------------|-----------------------------------------------------|
| <i>begin</i>     | Iterator to the first element in the range.         |
| <i>end</i>       | Iterator to one-past-the-last element in the range. |
| <i>sortOrder</i> | The requested sorting order.                        |

### 8.3.2.28 trim()

```
std::string& LinkPred::Utils::trim (
    std::string & str,
    const char * spaces = " \t\n\r\f\v" ) [inline]
```

Trim the string from left and right.

#### Parameters

|               |                 |
|---------------|-----------------|
| <i>str</i>    | Input string.   |
| <i>spaces</i> | List of spaces. |

### 8.3.2.29 writeEdgeScores()

```
template<typename Label = std::string>
void LinkPred::Utils::writeEdgeScores (
    std::string fileName,
    std::vector< EdgeScore< Label >> const & esv )
```

Write edges and their scores to file.

**Parameters**

|                 |                                                            |
|-----------------|------------------------------------------------------------|
| <i>fileName</i> | The file where the edges and their scores will be written. |
| <i>esv</i>      | A vector containing the edges with their scores.           |

## Chapter 9

# Class Documentation

### 9.1 LinkPred::ASPDistCalculator< Network, DistType, NbHopsType > Class Template Reference

Approximate shortest path distance calculator.

```
#include <netdistcalculator.hpp>
```

Inheritance diagram for LinkPred::ASPDistCalculator< Network, DistType, NbHopsType >:

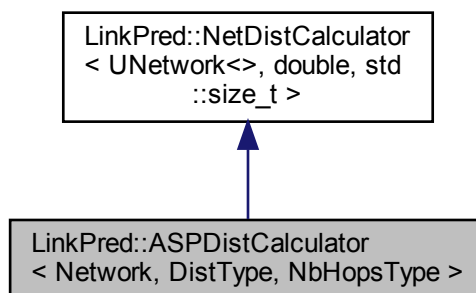

Collaboration diagram for LinkPred::ASPDistCalculator< Network, DistType, NbHopsType >:

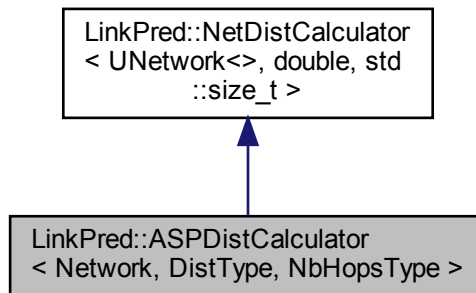

## Public Types

- using [LengthMapIdType](#) = typename [NetDistCalculator](#)< Network, DistType, NbHopsType >::LengthMapIdType
- using [NetworkSP](#) = typename [NetDistCalculator](#)< Network, DistType, NbHopsType >::NetworkSP
- using [NodeID](#) = typename [NetDistCalculator](#)< Network, DistType, NbHopsType >::NodeID
- using [Label](#) = typename [NetDistCalculator](#)< Network, DistType, NbHopsType >::Label
- using [Edge](#) = typename [NetDistCalculator](#)< Network, DistType, NbHopsType >::Edge
- using [NodeDistMap](#) = typename [NetDistCalculator](#)< Network, DistType, NbHopsType >::NodeDistMap
- using [NodeDistMapSP](#) = typename [NetDistCalculator](#)< Network, DistType, NbHopsType >::NodeDistMapSP
- using [EdgeLengthMap](#) = typename [NetDistCalculator](#)< Network, DistType, NbHopsType >::EdgeLengthMap
- using [EdgeLengthMapSP](#) = typename [NetDistCalculator](#)< Network, DistType, NbHopsType >::EdgeLengthMapSP

## Public Member Functions

- [ASPDistCalculator](#) ([Dijkstra](#)< Network, DistType, NbHopsType > &dijkstra, [EdgeLengthMapSP](#) length)
- [ASPDistCalculator](#) ([ASPDistCalculator](#) const &that)=default
- [ASPDistCalculator](#) & operator= ([ASPDistCalculator](#) const &that)=default
- [ASPDistCalculator](#) ([ASPDistCalculator](#) &&that)=default
- [ASPDistCalculator](#) & operator= ([ASPDistCalculator](#) &&that)=default
- template<typename InputIterator >  
void [setLandmarks](#) (InputIterator landmarksBegin, InputIterator landmarksEnd)
- virtual std::pair< DistType, NbHopsType > [getDist](#) ([NodeID](#) const &i, [NodeID](#) const &j)
- virtual std::pair< DistType, NbHopsType > [getIndDist](#) ([NodeID](#) const &i, [NodeID](#) const &j)
- virtual [NodeDistMapSP](#) [getDist](#) ([NodeID](#) const &i)
- virtual ~[ASPDistCalculator](#) ()

### 9.1.1 Detailed Description

```
template<typename Network = UNetwork<>, typename DistType = double, typename NbHopsType = std::size_t>
class LinkPred::ASPDistCalculator< Network, DistType, NbHopsType >
```

Approximate shortest path distance calculator.

This class implements a fast method to approximate shortest path distances in large networks. First, a set of landmarks is provided, then the distance between any two nodes is computed as the minimum over the sums of distances between the two nodes and any landmark.

## Template Parameters

|                   |                                                               |
|-------------------|---------------------------------------------------------------|
| <i>Network</i>    | The network type.                                             |
| <i>DistType</i>   | The distance type (can be an integer or floating point type). |
| <i>NbHopsType</i> | The type of the number of hops (must be an integer type).     |

## 9.1.2 Member Typedef Documentation

## 9.1.2.1 Edge

```
template<typename Network = UNetwork<>, typename DistType = double, typename NbHopsType =
std::size_t>
using LinkPred::ASPDistCalculator< Network, DistType, NbHopsType >::Edge = typename NetDistCalculator<Network,
DistType, NbHopsType>::Edge
```

Edge type.

## 9.1.2.2 EdgeLengthMap

```
template<typename Network = UNetwork<>, typename DistType = double, typename NbHopsType =
std::size_t>
using LinkPred::ASPDistCalculator< Network, DistType, NbHopsType >::EdgeLengthMap = typename
NetDistCalculator<Network, DistType, NbHopsType>::EdgeLengthMap
```

Edge length map.

## 9.1.2.3 EdgeLengthMapSP

```
template<typename Network = UNetwork<>, typename DistType = double, typename NbHopsType =
std::size_t>
using LinkPred::ASPDistCalculator< Network, DistType, NbHopsType >::EdgeLengthMapSP = typename
NetDistCalculator<Network, DistType, NbHopsType>::EdgeLengthMapSP
```

Shared pointer to an edge length map.

## 9.1.2.4 Label

```
template<typename Network = UNetwork<>, typename DistType = double, typename NbHopsType =
std::size_t>
using LinkPred::ASPDistCalculator< Network, DistType, NbHopsType >::Label = typename NetDistCalculator<Network,
DistType, NbHopsType>::Label
```

Nodes label type.

### 9.1.2.5 LengthMapIdType

```
template<typename Network = UNetwork<>, typename DistType = double, typename NbHopsType =
std::size_t>
using LinkPred::ASPDistCalculator< Network, DistType, NbHopsType >::LengthMapIdType = typename
NetDistCalculator<Network, DistType, NbHopsType>::LengthMapIdType
```

Length map ID type.

### 9.1.2.6 NetworkSP

```
template<typename Network = UNetwork<>, typename DistType = double, typename NbHopsType =
std::size_t>
using LinkPred::ASPDistCalculator< Network, DistType, NbHopsType >::NetworkSP = typename
NetDistCalculator<Network, DistType, NbHopsType>::NetworkSP
```

Shared pointer to network.

### 9.1.2.7 NodeDistMap

```
template<typename Network = UNetwork<>, typename DistType = double, typename NbHopsType =
std::size_t>
using LinkPred::ASPDistCalculator< Network, DistType, NbHopsType >::NodeDistMap = typename
NetDistCalculator<Network, DistType, NbHopsType>::NodeDistMap
```

Distance map.

### 9.1.2.8 NodeDistMapSP

```
template<typename Network = UNetwork<>, typename DistType = double, typename NbHopsType =
std::size_t>
using LinkPred::ASPDistCalculator< Network, DistType, NbHopsType >::NodeDistMapSP = typename
NetDistCalculator<Network, DistType, NbHopsType>::NodeDistMapSP
```

Shared pointer to a distance map.

### 9.1.2.9 NodeID

```
template<typename Network = UNetwork<>, typename DistType = double, typename NbHopsType =
std::size_t>
using LinkPred::ASPDistCalculator< Network, DistType, NbHopsType >::NodeID = typename NetDistCalculator<Network,
DistType, NbHopsType>::NodeID
```

Nodes ID type.

## 9.1.3 Constructor & Destructor Documentation

### 9.1.3.1 ASPDistCalculator() [1/3]

```
template<typename Network = UNetwork<>, typename DistType = double, typename NbHopsType =
std::size_t>
LinkPred::ASPDistCalculator< Network, DistType, NbHopsType >::ASPDistCalculator (
    Dijkstra< Network, DistType, NbHopsType > & dijkstra,
    EdgeLengthMapSP length ) [inline]
```

Constructor.



## Parameters

|                 |                                              |
|-----------------|----------------------------------------------|
| <i>dijkstra</i> | A <a href="#">Dijkstra</a> algorithm object. |
| <i>length</i>   | The length map.                              |

## 9.1.3.2 ASPDistCalculator() [2/3]

```
template<typename Network = UNetwork<>, typename DistType = double, typename NbHopsType =
std::size_t>
LinkPred::ASPDistCalculator< Network, DistType, NbHopsType >::ASPDistCalculator (
    ASPDistCalculator< Network, DistType, NbHopsType > const & that ) [default]
```

Copy constructor.

## Parameters

|             |                     |
|-------------|---------------------|
| <i>that</i> | The object to copy. |
|-------------|---------------------|

## 9.1.3.3 ASPDistCalculator() [3/3]

```
template<typename Network = UNetwork<>, typename DistType = double, typename NbHopsType =
std::size_t>
LinkPred::ASPDistCalculator< Network, DistType, NbHopsType >::ASPDistCalculator (
    ASPDistCalculator< Network, DistType, NbHopsType > && that ) [default]
```

Move constructor.

## Parameters

|             |                     |
|-------------|---------------------|
| <i>that</i> | The object to move. |
|-------------|---------------------|

## 9.1.3.4 ~ASPDistCalculator()

```
template<typename Network = UNetwork<>, typename DistType = double, typename NbHopsType =
std::size_t>
virtual LinkPred::ASPDistCalculator< Network, DistType, NbHopsType >::~~ASPDistCalculator ( )
[inline], [virtual]
```

Destructor.

## 9.1.4 Member Function Documentation

#### 9.1.4.1 getDist() [1/2]

```
template<typename Network = UNetwork<>, typename DistType = double, typename NbHopsType =
std::size_t>
virtual NodeDistMapSP LinkPred::ASPDistCalculator< Network, DistType, NbHopsType >::getDist (
    NodeID const & i ) [virtual]
```

##### Parameters

|          |              |
|----------|--------------|
| <i>i</i> | Source node. |
|----------|--------------|

##### Returns

The distance from *i* to all other nodes.

#### 9.1.4.2 getDist() [2/2]

```
template<typename Network = UNetwork<>, typename DistType = double, typename NbHopsType =
std::size_t>
virtual std::pair<DistType, NbHopsType> LinkPred::ASPDistCalculator< Network, DistType, Nb↔
HopsType >::getDist (
    NodeID const & i,
    NodeID const & j ) [virtual]
```

##### Parameters

|          |                           |
|----------|---------------------------|
| <i>i</i> | Index of the source node. |
| <i>j</i> | Index of the end node.    |

##### Returns

The distance between *i* and *j*.

#### 9.1.4.3 getIndDist()

```
template<typename Network = UNetwork<>, typename DistType = double, typename NbHopsType =
std::size_t>
virtual std::pair<DistType, NbHopsType> LinkPred::ASPDistCalculator< Network, DistType, Nb↔
HopsType >::getIndDist (
    NodeID const & i,
    NodeID const & j ) [inline], [virtual]
```

##### Parameters

|          |                           |
|----------|---------------------------|
| <i>i</i> | Index of the source node. |
| <i>j</i> | Index of the end node.    |

**Returns**

The distance between i and j ignoring the edge between i and j.

**9.1.4.4 operator=()** [1/2]

```
template<typename Network = UNetwork<>, typename DistType = double, typename NbHopsType =
std::size_t>
ASPDistCalculator& LinkPred::ASPDistCalculator< Network, DistType, NbHopsType >::operator= (
    ASPDistCalculator< Network, DistType, NbHopsType > && that ) [default]
```

Move assignment operator.

**Parameters**

|             |                     |
|-------------|---------------------|
| <i>that</i> | The object to move. |
|-------------|---------------------|

**9.1.4.5 operator=()** [2/2]

```
template<typename Network = UNetwork<>, typename DistType = double, typename NbHopsType =
std::size_t>
ASPDistCalculator& LinkPred::ASPDistCalculator< Network, DistType, NbHopsType >::operator= (
    ASPDistCalculator< Network, DistType, NbHopsType > const & that ) [default]
```

Copy assignment operator.

**Parameters**

|             |                     |
|-------------|---------------------|
| <i>that</i> | The object to copy. |
|-------------|---------------------|

**9.1.4.6 setLandmarks()**

```
template<typename Network = UNetwork<>, typename DistType = double, typename NbHopsType =
std::size_t>
template<typename InputIterator >
void LinkPred::ASPDistCalculator< Network, DistType, NbHopsType >::setLandmarks (
    InputIterator landmarksBegin,
    InputIterator landmarksEnd ) [inline]
```

Set the landmarks.

**Parameters**

|                       |                                          |
|-----------------------|------------------------------------------|
| <i>landmarksBegin</i> | Iterator to the first landmarks.         |
| <i>landmarksEnd</i>   | Iterator to one past the last landmarks. |

The documentation for this class was generated from the following file:

- [include/linkpred/graphalg/shortestpaths/netdistcalculator.hpp](#)

## 9.2 LinkPred::ASPDsimCalculator< Network, DsimType, NbHopsType > Class Template Reference

Approximate shortest path dissimilarity calculator.

```
#include <netdistcalculator.hpp>
```

Inheritance diagram for LinkPred::ASPDsimCalculator< Network, DsimType, NbHopsType >:

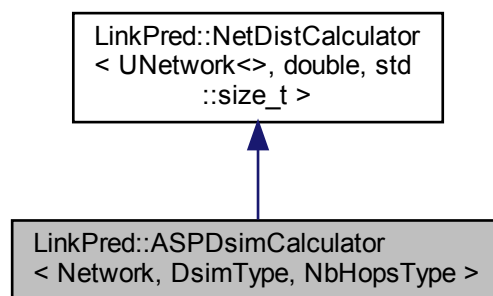

Collaboration diagram for LinkPred::ASPDsimCalculator< Network, DsimType, NbHopsType >:

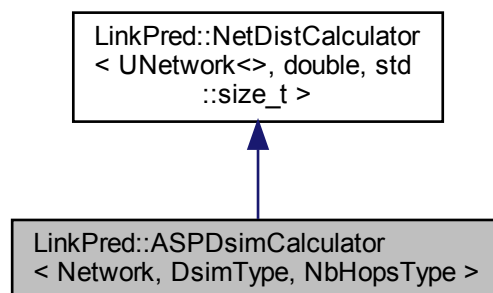

## Public Types

- using [LengthMapIdType](#) = typename [NetDistCalculator](#)< Network, DsimType, NbHopsType >::LengthMapIdType
- using [NetworkSP](#) = typename [NetDistCalculator](#)< Network, DsimType, NbHopsType >::NetworkSP
- using [NodeID](#) = typename [NetDistCalculator](#)< Network, DsimType, NbHopsType >::NodeID
- using [Label](#) = typename [NetDistCalculator](#)< Network, DsimType, NbHopsType >::Label
- using [Edge](#) = typename [NetDistCalculator](#)< Network, DsimType, NbHopsType >::Edge
- using [NodeDsimMap](#) = typename [NetDistCalculator](#)< Network, DsimType, NbHopsType >::NodeDistMap
- using [NodeDsimMapSP](#) = typename [NetDistCalculator](#)< Network, DsimType, NbHopsType >::NodeDistMapSP
- using [EdgeLengthMap](#) = typename [NetDistCalculator](#)< Network, DsimType, NbHopsType >::EdgeLengthMap
- using [EdgeLengthMapSP](#) = typename [NetDistCalculator](#)< Network, DsimType, NbHopsType >::EdgeLengthMapSP

## Public Member Functions

- [ASPDsimCalculator](#) ([Dijkstra](#)< Network, DsimType, NbHopsType > &dijkstra, [EdgeLengthMapSP](#) length)
- [ASPDsimCalculator](#) ([ASPDsimCalculator](#) const &that)=default
- [ASPDsimCalculator](#) & operator= ([ASPDsimCalculator](#) const &that)=default
- [ASPDsimCalculator](#) ([ASPDsimCalculator](#) &&that)=default
- [ASPDsimCalculator](#) & operator= ([ASPDsimCalculator](#) &&that)=default
- template<typename InputIterator >  
void [setLandmarks](#) (InputIterator landmarksBegin, InputIterator landmarksEnd)
- virtual std::pair< DsimType, NbHopsType > [getDist](#) ([NodeID](#) const &i, [NodeID](#) const &j)
- virtual std::pair< DsimType, NbHopsType > [getIndDist](#) ([NodeID](#) const &i, [NodeID](#) const &j)
- virtual [NodeDsimMapSP](#) [getDist](#) ([NodeID](#) const &i)
- virtual ~[ASPDsimCalculator](#) ()

### 9.2.1 Detailed Description

```
template<typename Network = UNetwork<>, typename DsimType = double, typename NbHopsType = std::size_t>
class LinkPred::ASPDsimCalculator< Network, DsimType, NbHopsType >
```

Approximate shortest path dissimilarity calculator.

#### Template Parameters

|                   |                                                               |
|-------------------|---------------------------------------------------------------|
| <i>Network</i>    | The network type.                                             |
| <i>DistType</i>   | The distance type (can be an integer or floating point type). |
| <i>NbHopsType</i> | The type of the number of hops (must be an integer type).     |

### 9.2.2 Member Typedef Documentation

#### 9.2.2.1 Edge

```
template<typename Network = UNetwork<>, typename DsimType = double, typename NbHopsType =
std::size_t>
```

```
using LinkPred::ASPDsimCalculator< Network, DsimType, NbHopsType >::Edge = typename NetDistCalculator<Network,
DsimType, NbHopsType>::Edge
```

Edge type.

### 9.2.2.2 EdgeLengthMap

```
template<typename Network = UNetwork<>, typename DsimType = double, typename NbHopsType =
std::size_t>
using LinkPred::ASPDsimCalculator< Network, DsimType, NbHopsType >::EdgeLengthMap = typename
NetDistCalculator<Network, DsimType, NbHopsType>::EdgeLengthMap
```

Edge length map.

### 9.2.2.3 EdgeLengthMapSP

```
template<typename Network = UNetwork<>, typename DsimType = double, typename NbHopsType =
std::size_t>
using LinkPred::ASPDsimCalculator< Network, DsimType, NbHopsType >::EdgeLengthMapSP = typename
NetDistCalculator<Network, DsimType, NbHopsType>::EdgeLengthMapSP
```

Shared pointer to an edge length map.

### 9.2.2.4 Label

```
template<typename Network = UNetwork<>, typename DsimType = double, typename NbHopsType =
std::size_t>
using LinkPred::ASPDsimCalculator< Network, DsimType, NbHopsType >::Label = typename NetDistCalculator<Network,
DsimType, NbHopsType>::Label
```

Nodes label type.

### 9.2.2.5 LengthMapIdType

```
template<typename Network = UNetwork<>, typename DsimType = double, typename NbHopsType =
std::size_t>
using LinkPred::ASPDsimCalculator< Network, DsimType, NbHopsType >::LengthMapIdType = typename
NetDistCalculator<Network, DsimType, NbHopsType>::LengthMapIdType
```

Length map ID type.

### 9.2.2.6 NetworkSP

```
template<typename Network = UNetwork<>, typename DsimType = double, typename NbHopsType =
std::size_t>
using LinkPred::ASPDsimCalculator< Network, DsimType, NbHopsType >::NetworkSP = typename
NetDistCalculator<Network, DsimType, NbHopsType>::NetworkSP
```

Shared pointer to network.

### 9.2.2.7 NodeDsimMap

```
template<typename Network = UNetwork<>, typename DsimType = double, typename NbHopsType =
std::size_t>
using LinkPred::ASPDsimCalculator< Network, DsimType, NbHopsType >::NodeDsimMap = typename
NetDistCalculator<Network, DsimType, NbHopsType>::NodeDistMap
```

Dissimilarity map.

### 9.2.2.8 NodeDsimMapSP

```
template<typename Network = UNetwork<>, typename DsimType = double, typename NbHopsType =
std::size_t>
using LinkPred::ASPDsimCalculator< Network, DsimType, NbHopsType >::NodeDsimMapSP = typename
NetDistCalculator<Network, DsimType, NbHopsType>::NodeDistMapSP
```

Shared pointer to a Dissimilarity map.

### 9.2.2.9 NodeID

```
template<typename Network = UNetwork<>, typename DsimType = double, typename NbHopsType =
std::size_t>
using LinkPred::ASPDsimCalculator< Network, DsimType, NbHopsType >::NodeID = typename NetDistCalculator<Network,
DsimType, NbHopsType>::NodeID
```

Nodes ID type.

## 9.2.3 Constructor & Destructor Documentation

### 9.2.3.1 ASPDsimCalculator() [1/3]

```
template<typename Network = UNetwork<>, typename DsimType = double, typename NbHopsType =
std::size_t>
LinkPred::ASPDsimCalculator< Network, DsimType, NbHopsType >::ASPDsimCalculator (
    Dijkstra< Network, DsimType, NbHopsType > & dijkstra,
    EdgeLengthMapSP length ) [inline]
```

Constructor.

Parameters

|                 |                                     |
|-----------------|-------------------------------------|
| <i>dijkstra</i> | A <b>Dijkstra</b> algorithm object. |
| <i>length</i>   | The length map.                     |

### 9.2.3.2 ASPDsimCalculator() [2/3]

```
template<typename Network = UNetwork<>, typename DsimType = double, typename NbHopsType =
std::size_t>
LinkPred::ASPDsimCalculator< Network, DsimType, NbHopsType >::ASPDsimCalculator (
    ASPDsimCalculator< Network, DsimType, NbHopsType > const & that ) [default]
```

Copy constructor.

#### Parameters

|             |                     |
|-------------|---------------------|
| <i>that</i> | The object to copy. |
|-------------|---------------------|

### 9.2.3.3 ASPDsimCalculator() [3/3]

```
template<typename Network = UNetwork<>, typename DsimType = double, typename NbHopsType =
std::size_t>
LinkPred::ASPDsimCalculator< Network, DsimType, NbHopsType >::ASPDsimCalculator (
    ASPDsimCalculator< Network, DsimType, NbHopsType > && that ) [default]
```

Move constructor.

#### Parameters

|             |                     |
|-------------|---------------------|
| <i>that</i> | The object to move. |
|-------------|---------------------|

### 9.2.3.4 ~ASPDsimCalculator()

```
template<typename Network = UNetwork<>, typename DsimType = double, typename NbHopsType =
std::size_t>
virtual LinkPred::ASPDsimCalculator< Network, DsimType, NbHopsType >::~~ASPDsimCalculator ( )
[inline], [virtual]
```

Destructor.

## 9.2.4 Member Function Documentation

### 9.2.4.1 getDist() [1/2]

```
template<typename Network = UNetwork<>, typename DsimType = double, typename NbHopsType =
std::size_t>
virtual NodeDsimMapSP LinkPred::ASPDsimCalculator< Network, DsimType, NbHopsType >::getDist (
    NodeID const & i ) [virtual]
```



**Parameters**

|          |              |
|----------|--------------|
| <i>i</i> | Source node. |
|----------|--------------|

**Returns**

The distance from *i* to all other nodes.

**9.2.4.2 getDist() [2/2]**

```
template<typename Network = UNetwork<>, typename DsimType = double, typename NbHopsType =
std::size_t>
virtual std::pair<DsimType, NbHopsType> LinkPred::ASPDsimCalculator< Network, DsimType, Nb↔
HopsType >::getDist (
    NodeID const & i,
    NodeID const & j ) [virtual]
```

**Parameters**

|          |                           |
|----------|---------------------------|
| <i>i</i> | Index of the source node. |
| <i>j</i> | Index of the end node.    |

**Returns**

The distance between *i* and *j*.

**9.2.4.3 getIndDist()**

```
template<typename Network = UNetwork<>, typename DsimType = double, typename NbHopsType =
std::size_t>
virtual std::pair<DsimType, NbHopsType> LinkPred::ASPDsimCalculator< Network, DsimType, Nb↔
HopsType >::getIndDist (
    NodeID const & i,
    NodeID const & j ) [inline], [virtual]
```

**Parameters**

|          |                           |
|----------|---------------------------|
| <i>i</i> | Index of the source node. |
| <i>j</i> | Index of the end node.    |

**Returns**

The distance between *i* and *j* ignoring the edge between *i* and *j*.

#### 9.2.4.4 operator=() [1/2]

```
template<typename Network = UNetwork<>, typename DsimType = double, typename NbHopsType =
std::size_t>
ASPDsimCalculator& LinkPred::ASPDsimCalculator< Network, DsimType, NbHopsType >::operator= (
    ASPDsimCalculator< Network, DsimType, NbHopsType > && that ) [default]
```

Move assignment operator.

##### Parameters

|             |                     |
|-------------|---------------------|
| <i>that</i> | The object to move. |
|-------------|---------------------|

#### 9.2.4.5 operator=() [2/2]

```
template<typename Network = UNetwork<>, typename DsimType = double, typename NbHopsType =
std::size_t>
ASPDsimCalculator& LinkPred::ASPDsimCalculator< Network, DsimType, NbHopsType >::operator= (
    ASPDsimCalculator< Network, DsimType, NbHopsType > const & that ) [default]
```

Copy assignment operator.

##### Parameters

|             |                     |
|-------------|---------------------|
| <i>that</i> | The object to copy. |
|-------------|---------------------|

#### 9.2.4.6 setLandmarks()

```
template<typename Network = UNetwork<>, typename DsimType = double, typename NbHopsType =
std::size_t>
template<typename InputIterator >
void LinkPred::ASPDsimCalculator< Network, DsimType, NbHopsType >::setLandmarks (
    InputIterator landmarksBegin,
    InputIterator landmarksEnd ) [inline]
```

Set the landmarks.

##### Parameters

|                       |                                          |
|-----------------------|------------------------------------------|
| <i>landmarksBegin</i> | Iterator to the first landmarks.         |
| <i>landmarksEnd</i>   | Iterator to one past the last landmarks. |

The documentation for this class was generated from the following file:

- [include/linkpred/graphalg/shortestpaths/netdistcalculator.hpp](#)

## 9.3 LinkPred::BFS< Network, NodeProcessor > Class Template Reference

[BFS](#) graph traversal.

```
#include <graphtraversal.hpp>
```

Inheritance diagram for LinkPred::BFS< Network, NodeProcessor >:

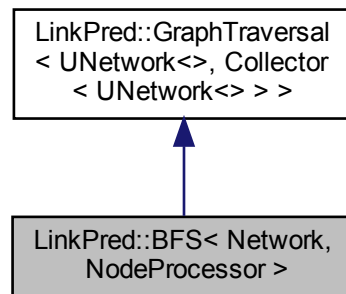

Collaboration diagram for LinkPred::BFS< Network, NodeProcessor >:

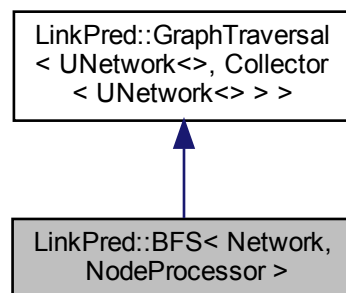

### Public Member Functions

- [BFS](#) (std::shared\_ptr< Network const > net)
- [BFS](#) ([BFS](#) const &that)=default
- [BFS](#) & [operator=](#) ([BFS](#) const &that)=default
- [BFS](#) ([BFS](#) &&that)=default
- [BFS](#) & [operator=](#) ([BFS](#) &&that)=default
- virtual void [traverse](#) (typename Network::NodeID srcNode, NodeProcessor &processor)
- virtual [~BFS](#) ()=default

### 9.3.1 Detailed Description

```
template<typename Network = UNetwork<>, typename NodeProcessor = Collector< Network>>
class LinkPred::BFS< Network, NodeProcessor >
```

**BFS** graph traversal.

Template Parameters

|                      |                          |
|----------------------|--------------------------|
| <i>Network</i>       | The network type.        |
| <i>NodeProcessor</i> | The node processor type. |

### 9.3.2 Constructor & Destructor Documentation

#### 9.3.2.1 BFS() [1/3]

```
template<typename Network = UNetwork<>, typename NodeProcessor = Collector< Network>>
LinkPred::BFS< Network, NodeProcessor >::BFS (
    std::shared_ptr< Network const > net ) [inline]
```

< The network on which traversal is done. Constructor.

Parameters

|            |                                         |
|------------|-----------------------------------------|
| <i>net</i> | The network on which traversal is done. |
|------------|-----------------------------------------|

#### 9.3.2.2 BFS() [2/3]

```
template<typename Network = UNetwork<>, typename NodeProcessor = Collector< Network>>
LinkPred::BFS< Network, NodeProcessor >::BFS (
    BFS< Network, NodeProcessor > const & that ) [default]
```

Copy constructor.

Parameters

|             |                     |
|-------------|---------------------|
| <i>that</i> | The object to copy. |
|-------------|---------------------|

#### 9.3.2.3 BFS() [3/3]

```
template<typename Network = UNetwork<>, typename NodeProcessor = Collector< Network>>
```

```
LinkPred::BFS< Network, NodeProcessor >::BFS (
    BFS< Network, NodeProcessor > && that ) [default]
```

Move constructor.

#### Parameters

|             |                     |
|-------------|---------------------|
| <i>that</i> | The object to move. |
|-------------|---------------------|

#### 9.3.2.4 ~BFS()

```
template<typename Network = UNetwork<>, typename NodeProcessor = Collector< Network>>
virtual LinkPred::BFS< Network, NodeProcessor >::~~BFS ( ) [virtual], [default]
```

Destructor.

### 9.3.3 Member Function Documentation

#### 9.3.3.1 operator=() [1/2]

```
template<typename Network = UNetwork<>, typename NodeProcessor = Collector< Network>>
BFS& LinkPred::BFS< Network, NodeProcessor >::operator= (
    BFS< Network, NodeProcessor > && that ) [default]
```

Move assignment operator.

#### Parameters

|             |                     |
|-------------|---------------------|
| <i>that</i> | The object to move. |
|-------------|---------------------|

#### 9.3.3.2 operator=() [2/2]

```
template<typename Network = UNetwork<>, typename NodeProcessor = Collector< Network>>
BFS& LinkPred::BFS< Network, NodeProcessor >::operator= (
    BFS< Network, NodeProcessor > const & that ) [default]
```

Copy assignment operator.

#### Parameters

|             |                     |
|-------------|---------------------|
| <i>that</i> | The object to copy. |
|-------------|---------------------|

### 9.3.3.3 traverse()

```
template<typename Network = UNetwork<>, typename NodeProcessor = Collector< Network>>
virtual void LinkPred::BFS< Network, NodeProcessor >::traverse (
    typename Network::NodeID srcNode,
    NodeProcessor & processor ) [inline], [virtual]
```

Traverse the graph in [BFS](#) order.

#### Parameters

|                  |                     |
|------------------|---------------------|
| <i>srcNode</i>   | The source node.    |
| <i>processor</i> | The node processor. |

The documentation for this class was generated from the following file:

- [include/linkpred/graphalg/traversal/graphtraversal.hpp](#)

## 9.4 LinkPred::BHeap< T, P, ComparatorT, ComparatorP > Class Template Reference

A binary heap.

```
#include <bheap.hpp>
```

### Public Member Functions

- [BHeap](#) ()
- [BHeap](#) ([BHeap](#) const &that)=default
- [BHeap](#) & [operator=](#) ([BHeap](#) const &that)=default
- [BHeap](#) ([BHeap](#) &&that)=default
- [BHeap](#) & [operator=](#) ([BHeap](#) &&that)=default
- `std::size_t` [size](#) ()
- `bool` [push](#) (T const &elem, P const &pr)
- `const std::pair< T, P > &` [top](#) () const
- `void` [pop](#) ()
- `void` [set](#) (T const &elem, P const &pr)
- `void` [increase](#) (T const &elem, P const &pr)
- `void` [decrease](#) (T const &elem, P const &pr)
- `bool` [tryIncrease](#) (T const &elem, P const &pr)
- `bool` [tryDecrease](#) (T const &elem, P const &pr)
- `bool` [contains](#) (T const &elem)
- `void` [print](#) ()
- `virtual` [~BHeap](#) ()=default

### 9.4.1 Detailed Description

```
template<typename T, typename P = int, typename ComparatorT = std::less<T>, typename ComparatorP = std::less<P>>  
class LinkPred::BHeap< T, P, ComparatorT, ComparatorP >
```

A binary heap.

This class implements a binary heap priority queue offering  $O(\log n)$  insert, remove, and  $O(\log n)^2$  priority update.

## Template Parameters

|                    |                          |
|--------------------|--------------------------|
| <i>T</i>           | The stored data type.    |
| <i>P</i>           | The priority type.       |
| <i>ComparatorT</i> | The data comparator.     |
| <i>ComparatorP</i> | The priority comparator. |

## 9.4.2 Constructor &amp; Destructor Documentation

## 9.4.2.1 BHeap() [1/3]

```
template<typename T , typename P = int, typename ComparatorT = std::less<T>, typename ComparatorP
= std::less<P>>
LinkPred::BHeap< T, P, ComparatorT, ComparatorP >::BHeap ( ) [inline]
```

Constructor.

## 9.4.2.2 BHeap() [2/3]

```
template<typename T , typename P = int, typename ComparatorT = std::less<T>, typename ComparatorP
= std::less<P>>
LinkPred::BHeap< T, P, ComparatorT, ComparatorP >::BHeap (
    BHeap< T, P, ComparatorT, ComparatorP > const & that ) [default]
```

Copy constructor.

## Parameters

|             |                     |
|-------------|---------------------|
| <i>that</i> | The object to copy. |
|-------------|---------------------|

## 9.4.2.3 BHeap() [3/3]

```
template<typename T , typename P = int, typename ComparatorT = std::less<T>, typename ComparatorP
= std::less<P>>
LinkPred::BHeap< T, P, ComparatorT, ComparatorP >::BHeap (
    BHeap< T, P, ComparatorT, ComparatorP > && that ) [default]
```

Move constructor.

## Parameters

|             |                     |
|-------------|---------------------|
| <i>that</i> | The object to move. |
|-------------|---------------------|



#### 9.4.2.4 ~BHeap()

```
template<typename T , typename P = int, typename ComparatorT = std::less<T>, typename ComparatorP
= std::less<P>>
virtual LinkPred::BHeap< T, P, ComparatorT, ComparatorP >::~~BHeap ( ) [virtual], [default]
```

Destructor.

### 9.4.3 Member Function Documentation

#### 9.4.3.1 contains()

```
template<typename T , typename P = int, typename ComparatorT = std::less<T>, typename ComparatorP
= std::less<P>>
bool LinkPred::BHeap< T, P, ComparatorT, ComparatorP >::contains (
    T const & elem ) [inline]
```

Check if an element exists.

##### Parameters

|             |                            |
|-------------|----------------------------|
| <i>elem</i> | The element to be checked. |
|-------------|----------------------------|

##### Returns

True if *elem* exists in the heap, false otherwise.

#### 9.4.3.2 decrease()

```
template<typename T , typename P = int, typename ComparatorT = std::less<T>, typename ComparatorP
= std::less<P>>
void LinkPred::BHeap< T, P, ComparatorT, ComparatorP >::decrease (
    T const & elem,
    P const & pr ) [inline]
```

Decrease the priority of an element.

##### Parameters

|             |                                                                  |
|-------------|------------------------------------------------------------------|
| <i>elem</i> | The element.                                                     |
| <i>pr</i>   | The new priority. This must not be greater than the current one. |

### 9.4.3.3 `increase()`

```
template<typename T , typename P = int, typename ComparatorT = std::less<T>, typename ComparatorP
= std::less<P>>
void LinkPred::BHeap< T, P, ComparatorT, ComparatorP >::increase (
    T const & elem,
    P const & pr ) [inline]
```

Increase the priority of an element.

#### Parameters

|             |                                                                  |
|-------------|------------------------------------------------------------------|
| <i>elem</i> | The element.                                                     |
| <i>pr</i>   | The new priority. This must not be smaller than the current one. |

### 9.4.3.4 `operator=()` [1/2]

```
template<typename T , typename P = int, typename ComparatorT = std::less<T>, typename ComparatorP
= std::less<P>>
BHeap& LinkPred::BHeap< T, P, ComparatorT, ComparatorP >::operator= (
    BHeap< T, P, ComparatorT, ComparatorP > && that ) [default]
```

Move assignment operator.

#### Parameters

|             |                     |
|-------------|---------------------|
| <i>that</i> | The object to move. |
|-------------|---------------------|

### 9.4.3.5 `operator=()` [2/2]

```
template<typename T , typename P = int, typename ComparatorT = std::less<T>, typename ComparatorP
= std::less<P>>
BHeap& LinkPred::BHeap< T, P, ComparatorT, ComparatorP >::operator= (
    BHeap< T, P, ComparatorT, ComparatorP > const & that ) [default]
```

Copy assignment operator.

#### Parameters

|             |                     |
|-------------|---------------------|
| <i>that</i> | The object to copy. |
|-------------|---------------------|

#### 9.4.3.6 pop()

```
template<typename T , typename P = int, typename ComparatorT = std::less<T>, typename ComparatorP
= std::less<P>>
void LinkPred::BHeap< T, P, ComparatorT, ComparatorP >::pop ( ) [inline]
```

Remove the element with the highest priority.

#### 9.4.3.7 print()

```
template<typename T , typename P = int, typename ComparatorT = std::less<T>, typename ComparatorP
= std::less<P>>
void LinkPred::BHeap< T, P, ComparatorT, ComparatorP >::print ( ) [inline]
```

Print the heap content to std::cout.

#### 9.4.3.8 push()

```
template<typename T , typename P = int, typename ComparatorT = std::less<T>, typename ComparatorP
= std::less<P>>
bool LinkPred::BHeap< T, P, ComparatorT, ComparatorP >::push (
    T const & elem,
    P const & pr ) [inline]
```

Push an element. If the element already exists, its priority is updated.

##### Parameters

|             |                           |
|-------------|---------------------------|
| <i>elem</i> | The element to be pushed. |
| <i>pr</i>   | The priority.             |

##### Returns

True if the element is inserted, false if it already exists.

#### 9.4.3.9 set()

```
template<typename T , typename P = int, typename ComparatorT = std::less<T>, typename ComparatorP
= std::less<P>>
void LinkPred::BHeap< T, P, ComparatorT, ComparatorP >::set (
    T const & elem,
    P const & pr ) [inline]
```

Set the priority of an element.

##### Parameters

|             |                   |
|-------------|-------------------|
| <i>elem</i> | The element.      |
| <i>pr</i>   | The new priority. |

#### 9.4.3.10 size()

```
template<typename T , typename P = int, typename ComparatorT = std::less<T>, typename ComparatorP
= std::less<P>>
std::size_t LinkPred::BHeap< T, P, ComparatorT, ComparatorP >::size ( ) [inline]
```

##### Returns

The size of the heap.

#### 9.4.3.11 top()

```
template<typename T , typename P = int, typename ComparatorT = std::less<T>, typename ComparatorP
= std::less<P>>
const std::pair<T, P>& LinkPred::BHeap< T, P, ComparatorT, ComparatorP >::top ( ) const [inline]
```

Return the element with the highest priority. This method does not remove the element.

##### Returns

A constant reference to pair, where the first element is the data and the second is the associated priority.

#### 9.4.3.12 tryDecrease()

```
template<typename T , typename P = int, typename ComparatorT = std::less<T>, typename ComparatorP
= std::less<P>>
bool LinkPred::BHeap< T, P, ComparatorT, ComparatorP >::tryDecrease (
    T const & elem,
    P const & pr ) [inline]
```

Try to decrease the priority.

##### Parameters

|             |                                                                                         |
|-------------|-----------------------------------------------------------------------------------------|
| <i>elem</i> | The element.                                                                            |
| <i>pr</i>   | The new priority. The priority is updated only if this is smaller than the current one. |

##### Returns

True if the priority is updated, false otherwise.

### 9.4.3.13 tryIncrease()

```
template<typename T , typename P = int, typename ComparatorT = std::less<T>, typename ComparatorP
= std::less<P>>
bool LinkPred::BHeap< T, P, ComparatorT, ComparatorP >::tryIncrease (
    T const & elem,
    P const & pr ) [inline]
```

Try to increase the priority.

#### Parameters

|             |                                                                                         |
|-------------|-----------------------------------------------------------------------------------------|
| <i>elem</i> | The element.                                                                            |
| <i>pr</i>   | The new priority. The priority is updated only if this is greater than the current one. |

#### Returns

True if the priority is updated, false otherwise.

The documentation for this class was generated from the following file:

- [include/linkpred/core/ds/bheap.hpp](#)

## 9.5 LinkPred::Bhmap< K, P, Comparator > Class Template Reference

A bidirectional half map.

```
#include <bhmap.hpp>
```

### Public Types

- using [k\\_const\\_iterator](#) = typename std::map< K, P, Comparator >::const\_iterator
- using [p\\_const\\_iterator](#) = typename std::vector< std::pair< P, K > >::const\_iterator

### Public Member Functions

- [Bhmap](#) ()=default
- [Bhmap](#) ([Bhmap](#) const &that)=default
- [Bhmap](#) & [operator=](#) ([Bhmap](#) const &that)=default
- [Bhmap](#) ([Bhmap](#) &&that)=default
- [Bhmap](#) & [operator=](#) ([Bhmap](#) &&that)=default
- std::pair< P, bool > [insert](#) (K const &key)
- std::size\_t [size](#) () const
- [p\\_const\\_iterator](#) [pbegin](#) () const
- [p\\_const\\_iterator](#) [pend](#) () const
- [k\\_const\\_iterator](#) [kbegin](#) () const
- [k\\_const\\_iterator](#) [kend](#) () const
- const P & [pos](#) (K const &key) const
- const K & [key](#) (P const &pos) const
- [k\\_const\\_iterator](#) [pfind](#) (K const &key) const
- [p\\_const\\_iterator](#) [kfind](#) (P const &pos) const
- virtual [~Bhmap](#) ()=default

### 9.5.1 Detailed Description

```
template<typename K, typename P = std::size_t, typename Comparator = std::less<K>>
class LinkPred::Bhmap< K, P, Comparator >
```

A bidirectional half map.

This is a special type of a bidirectional map, where user-provided keys are mapped to positions. The latter are contiguous from 0 to n-1, and are assigned according to insertion order. The lookup of position given the key is done in  $O(\log n)$ , whereas the reverse lookup is done in  $O(1)$ .

#### Template Parameters

|                   |                                      |
|-------------------|--------------------------------------|
| <i>K</i>          | The key type.                        |
| <i>P</i>          | The position type (must be integer). |
| <i>Comparator</i> | Key comparator.                      |

### 9.5.2 Member Typedef Documentation

#### 9.5.2.1 k\_const\_iterator

```
template<typename K , typename P = std::size_t, typename Comparator = std::less<K>>
using LinkPred::Bhmap< K, P, Comparator >::k_const_iterator = typename std::map<K, P, Comparator>↵
::const_iterator
```

Constant iterator over keys.

#### 9.5.2.2 p\_const\_iterator

```
template<typename K , typename P = std::size_t, typename Comparator = std::less<K>>
using LinkPred::Bhmap< K, P, Comparator >::p_const_iterator = typename std::vector<std↵
::pair<P, K> >::const_iterator
```

Constant iterator over positions.

### 9.5.3 Constructor & Destructor Documentation

#### 9.5.3.1 Bhmap() [1/3]

```
template<typename K , typename P = std::size_t, typename Comparator = std::less<K>>
LinkPred::Bhmap< K, P, Comparator >::Bhmap ( ) [default]
```

Constructor.

### 9.5.3.2 Bhmap() [2/3]

```
template<typename K , typename P = std::size_t, typename Comparator = std::less<K>>
LinkPred::Bhmap< K, P, Comparator >::Bhmap (
    Bhmap< K, P, Comparator > const & that ) [default]
```

Copy constructor.

#### Parameters

|             |                     |
|-------------|---------------------|
| <i>that</i> | The object to copy. |
|-------------|---------------------|

### 9.5.3.3 Bhmap() [3/3]

```
template<typename K , typename P = std::size_t, typename Comparator = std::less<K>>
LinkPred::Bhmap< K, P, Comparator >::Bhmap (
    Bhmap< K, P, Comparator > && that ) [default]
```

Move constructor.

#### Parameters

|             |                     |
|-------------|---------------------|
| <i>that</i> | The object to move. |
|-------------|---------------------|

### 9.5.3.4 ~Bhmap()

```
template<typename K , typename P = std::size_t, typename Comparator = std::less<K>>
virtual LinkPred::Bhmap< K, P, Comparator >::~~Bhmap ( ) [virtual], [default]
```

Destructor.

## 9.5.4 Member Function Documentation

### 9.5.4.1 insert()

```
template<typename K , typename P = std::size_t, typename Comparator = std::less<K>>
std::pair<P, bool> LinkPred::Bhmap< K, P, Comparator >::insert (
    K const & key ) [inline]
```

Add an element if it does not already exist.

**Parameters**

|            |          |
|------------|----------|
| <i>key</i> | The key. |
|------------|----------|

**Returns**

True if the key is added, false if it already exists.

**9.5.4.2 kbegin()**

```
template<typename K , typename P = std::size_t, typename Comparator = std::less<K>>
k_const_iterator LinkPred::Bhmap< K, P, Comparator >::kbegin ( ) const [inline]
```

**Returns**

Begin iterator.

**9.5.4.3 kend()**

```
template<typename K , typename P = std::size_t, typename Comparator = std::less<K>>
k_const_iterator LinkPred::Bhmap< K, P, Comparator >::kend ( ) const [inline]
```

**Returns**

End iterator.

**9.5.4.4 key()**

```
template<typename K , typename P = std::size_t, typename Comparator = std::less<K>>
const K& LinkPred::Bhmap< K, P, Comparator >::key (
    P const & pos ) const [inline]
```

**Returns**

A reference to the mapped key.

**9.5.4.5 kfind()**

```
template<typename K , typename P = std::size_t, typename Comparator = std::less<K>>
p_const_iterator LinkPred::Bhmap< K, P, Comparator >::kfind (
    P const & pos ) const [inline]
```

Find a position. This operation is O(1).



## Parameters

|            |               |
|------------|---------------|
| <i>pos</i> | The position. |
|------------|---------------|

## Returns

An iterator to the position.

**9.5.4.6 operator=()** [1/2]

```
template<typename K , typename P = std::size_t, typename Comparator = std::less<K>>
Bhmap& LinkPred::Bhmap< K, P, Comparator >::operator= (
    Bhmap< K, P, Comparator > && that ) [default]
```

Move assignment operator.

## Parameters

|             |                     |
|-------------|---------------------|
| <i>that</i> | The object to move. |
|-------------|---------------------|

**9.5.4.7 operator=()** [2/2]

```
template<typename K , typename P = std::size_t, typename Comparator = std::less<K>>
Bhmap& LinkPred::Bhmap< K, P, Comparator >::operator= (
    Bhmap< K, P, Comparator > const & that ) [default]
```

Copy assignment operator.

## Parameters

|             |                     |
|-------------|---------------------|
| <i>that</i> | The object to copy. |
|-------------|---------------------|

**9.5.4.8 pbegin()**

```
template<typename K , typename P = std::size_t, typename Comparator = std::less<K>>
p_const_iterator LinkPred::Bhmap< K, P, Comparator >::pbegin ( ) const [inline]
```

## Returns

Begin iterator.

#### 9.5.4.9 pend()

```
template<typename K , typename P = std::size_t, typename Comparator = std::less<K>>
k_const_iterator LinkPred::Bhmap< K, P, Comparator >::pend ( ) const [inline]
```

##### Returns

End iterator.

#### 9.5.4.10 pfind()

```
template<typename K , typename P = std::size_t, typename Comparator = std::less<K>>
k_const_iterator LinkPred::Bhmap< K, P, Comparator >::pfind (
    K const & key ) const [inline]
```

Find a key. This operation is  $O(\log(n))$ .

##### Parameters

|            |          |
|------------|----------|
| <i>key</i> | The key. |
|------------|----------|

##### Returns

An iterator to the key.

#### 9.5.4.11 pos()

```
template<typename K , typename P = std::size_t, typename Comparator = std::less<K>>
const P& LinkPred::Bhmap< K, P, Comparator >::pos (
    K const & key ) const [inline]
```

##### Returns

A reference to the mapped key.

#### 9.5.4.12 size()

```
template<typename K , typename P = std::size_t, typename Comparator = std::less<K>>
std::size_t LinkPred::Bhmap< K, P, Comparator >::size ( ) const [inline]
```

##### Returns

The size of the map.

The documentation for this class was generated from the following file:

- [include/linkpred/core/ds/bhmap.hpp](#)

## 9.6 LinkPred::Classifier< InRndIt, OutRndIt, ScoreRndIt > Class Template Reference

Interface of a binary classifier.

```
#include <classifier.hpp>
```

### Public Member Functions

- [Classifier](#) ()=default
- [Classifier](#) ([Classifier](#) const &that)=default
- [Classifier](#) & [operator=](#) ([Classifier](#) const &that)=default
- [Classifier](#) ([Classifier](#) &&that)=default
- [Classifier](#) & [operator=](#) ([Classifier](#) &&that)=default
- virtual void [learn](#) (InRndIt trInBegin, InRndIt trInEnd, OutRndIt trOutBegin, OutRndIt trOutEnd)=0
- virtual void [predict](#) (InRndIt inBegin, InRndIt inEnd, ScoreRndIt scoresBegin)=0
- const std::string & [getName](#) () const
- void [setName](#) (const std::string &name)
- virtual [~Classifier](#) ()=default

### 9.6.1 Detailed Description

```
template<typename InRndIt = typename std::vector<Vec>::iterator, typename OutRndIt = typename std::vector<bool>::iterator,
typename ScoreRndIt = typename std::vector<double>::iterator>
class LinkPred::Classifier< InRndIt, OutRndIt, ScoreRndIt >
```

Interface of a binary classifier.

#### Template Parameters

|                         |                                                                                              |
|-------------------------|----------------------------------------------------------------------------------------------|
| <i>InRndIt</i>          | Input (features) iterator type. Must be a random iterator to <a href="#">LinkPred::Vec</a> . |
| <i>OutRndIt</i>         | Output (class) iterator type. Must be a random iterator to <a href="#">LinkPred::Vec</a> .   |
| <i>Score↵<br/>RndIt</i> | Classification scores iterator type. Must be a random iterator to bool.                      |

### 9.6.2 Constructor & Destructor Documentation

#### 9.6.2.1 Classifier() [1/3]

```
template<typename InRndIt = typename std::vector<Vec>::iterator, typename OutRndIt = typename
std::vector<bool>::iterator, typename ScoreRndIt = typename std::vector<double>::iterator>
LinkPred::Classifier< InRndIt, OutRndIt, ScoreRndIt >::Classifier ( ) [default]
```

Default constructor.

### 9.6.2.2 Classifier() [2/3]

```
template<typename InRndIt = typename std::vector<Vec>::iterator, typename OutRndIt = typename
std::vector<bool>::iterator, typename ScoreRndIt = typename std::vector<double>::iterator>
LinkPred::Classifier< InRndIt, OutRndIt, ScoreRndIt >::Classifier (
    Classifier< InRndIt, OutRndIt, ScoreRndIt > const & that ) [default]
```

Copy constructor.

#### Parameters

|             |                     |
|-------------|---------------------|
| <i>that</i> | The object to copy. |
|-------------|---------------------|

### 9.6.2.3 Classifier() [3/3]

```
template<typename InRndIt = typename std::vector<Vec>::iterator, typename OutRndIt = typename
std::vector<bool>::iterator, typename ScoreRndIt = typename std::vector<double>::iterator>
LinkPred::Classifier< InRndIt, OutRndIt, ScoreRndIt >::Classifier (
    Classifier< InRndIt, OutRndIt, ScoreRndIt > && that ) [default]
```

Move constructor.

#### Parameters

|             |                     |
|-------------|---------------------|
| <i>that</i> | The object to move. |
|-------------|---------------------|

### 9.6.2.4 ~Classifier()

```
template<typename InRndIt = typename std::vector<Vec>::iterator, typename OutRndIt = typename
std::vector<bool>::iterator, typename ScoreRndIt = typename std::vector<double>::iterator>
virtual LinkPred::Classifier< InRndIt, OutRndIt, ScoreRndIt >::~Classifier ( ) [virtual],
[default]
```

Destructor.

## 9.6.3 Member Function Documentation

### 9.6.3.1 getName()

```
template<typename InRndIt = typename std::vector<Vec>::iterator, typename OutRndIt = typename
std::vector<bool>::iterator, typename ScoreRndIt = typename std::vector<double>::iterator>
const std::string& LinkPred::Classifier< InRndIt, OutRndIt, ScoreRndIt >::getName ( ) const
[inline]
```

#### Returns

The name of the classifier.

### 9.6.3.2 learn()

```
template<typename InRndIt = typename std::vector<Vec>::iterator, typename OutRndIt = typename
std::vector<bool>::iterator, typename ScoreRndIt = typename std::vector<double>::iterator>
virtual void LinkPred::Classifier< InRndIt, OutRndIt, ScoreRndIt >::learn (
    InRndIt trInBegin,
    InRndIt trInEnd,
    OutRndIt trOutBegin,
    OutRndIt trOutEnd ) [pure virtual]
```

Learn from data.

#### Parameters

|                   |                                                         |
|-------------------|---------------------------------------------------------|
| <i>trInBegin</i>  | Iterator to the first example features (input).         |
| <i>trInEnd</i>    | Iterator to one-past-the-last example features (input). |
| <i>trOutBegin</i> | Iterator to the first example class (output).           |
| <i>trOutEnd</i>   | Iterator to one-past-the-last example class (output).   |

### 9.6.3.3 operator=() [1/2]

```
template<typename InRndIt = typename std::vector<Vec>::iterator, typename OutRndIt = typename
std::vector<bool>::iterator, typename ScoreRndIt = typename std::vector<double>::iterator>
Classifier& LinkPred::Classifier< InRndIt, OutRndIt, ScoreRndIt >::operator= (
    Classifier< InRndIt, OutRndIt, ScoreRndIt > && that ) [default]
```

Move assignment operator.

#### Parameters

|             |                     |
|-------------|---------------------|
| <i>that</i> | The object to move. |
|-------------|---------------------|

#### 9.6.3.4 operator=() [2/2]

```
template<typename InRndIt = typename std::vector<Vec>::iterator, typename OutRndIt = typename
std::vector<bool>::iterator, typename ScoreRndIt = typename std::vector<double>::iterator>
Classifier& LinkPred::Classifier< InRndIt, OutRndIt, ScoreRndIt >::operator= (
    Classifier< InRndIt, OutRndIt, ScoreRndIt > const & that ) [default]
```

Copy assignment operator.

##### Parameters

|             |                     |
|-------------|---------------------|
| <i>that</i> | The object to copy. |
|-------------|---------------------|

#### 9.6.3.5 predict()

```
template<typename InRndIt = typename std::vector<Vec>::iterator, typename OutRndIt = typename
std::vector<bool>::iterator, typename ScoreRndIt = typename std::vector<double>::iterator>
virtual void LinkPred::Classifier< InRndIt, OutRndIt, ScoreRndIt >::predict (
    InRndIt inBegin,
    InRndIt inEnd,
    ScoreRndIt scoresBegin ) [pure virtual]
```

Predict.

##### Parameters

|                    |                                                                                                |
|--------------------|------------------------------------------------------------------------------------------------|
| <i>inBegin</i>     | Iterator to the first instance features (input).                                               |
| <i>inEnd</i>       | Iterator to one-past-the-last instance features (input).                                       |
| <i>scoresBegin</i> | Iterator to the first location where to store prediction scores. Memory must be pre-allocated. |

#### 9.6.3.6 setName()

```
template<typename InRndIt = typename std::vector<Vec>::iterator, typename OutRndIt = typename
std::vector<bool>::iterator, typename ScoreRndIt = typename std::vector<double>::iterator>
void LinkPred::Classifier< InRndIt, OutRndIt, ScoreRndIt >::setName (
    const std::string & name ) [inline]
```

Set the name of the classifier.

##### Parameters

|             |                                 |
|-------------|---------------------------------|
| <i>name</i> | The new name of the classifier. |
|-------------|---------------------------------|

The documentation for this class was generated from the following file:

- include/linkpred/ml/classifiers/[classifier.hpp](#)

## 9.7 LinkPred::Collector< Network > Class Template Reference

A class that collects nodes during traversal.

```
#include <graphtraversal.hpp>
```

### Public Member Functions

- [Collector](#) ()=default
- [Collector](#) ([Collector](#) const &that)=default
- [Collector](#) & [operator=](#) ([Collector](#) const &that)=default
- [Collector](#) ([Collector](#) &&that)=default
- [Collector](#) & [operator=](#) ([Collector](#) &&that)=default
- bool [process](#) (typename Network::NodeID const &i)
- const std::queue< typename Network::NodeID > & [getVisited](#) () const
- virtual [~Collector](#) ()=default

### 9.7.1 Detailed Description

```
template<typename Network = UNetwork<>>
class LinkPred::Collector< Network >
```

A class that collects nodes during traversal.

Template Parameters

|                |                   |
|----------------|-------------------|
| <i>Network</i> | The network type. |
|----------------|-------------------|

### 9.7.2 Constructor & Destructor Documentation

#### 9.7.2.1 Collector() [1/3]

```
template<typename Network = UNetwork<>>
LinkPred::Collector< Network >::Collector ( ) [default]
```

Constructor.

#### 9.7.2.2 Collector() [2/3]

```
template<typename Network = UNetwork<>>
LinkPred::Collector< Network >::Collector (
    Collector< Network > const & that ) [default]
```

Copy constructor.

## Parameters

|             |                     |
|-------------|---------------------|
| <i>that</i> | The object to copy. |
|-------------|---------------------|

**9.7.2.3 Collector()** [3/3]

```
template<typename Network = UNetwork<>>
LinkPred::Collector< Network >::Collector (
    Collector< Network > && that ) [default]
```

Move constructor.

## Parameters

|             |                     |
|-------------|---------------------|
| <i>that</i> | The object to move. |
|-------------|---------------------|

**9.7.2.4 ~Collector()**

```
template<typename Network = UNetwork<>>
virtual LinkPred::Collector< Network >::~~Collector ( ) [virtual], [default]
```

Destructor.

**9.7.3 Member Function Documentation****9.7.3.1 getVisited()**

```
template<typename Network = UNetwork<>>
const std::queue<typename Network::NodeID>& LinkPred::Collector< Network >::getVisited ( )
const [inline]
```

## Returns

The visited nodes.

**9.7.3.2 operator=()** [1/2]

```
template<typename Network = UNetwork<>>
Collector& LinkPred::Collector< Network >::operator= (
    Collector< Network > && that ) [default]
```

Move assignment operator.



## Parameters

|             |                     |
|-------------|---------------------|
| <i>that</i> | The object to move. |
|-------------|---------------------|

## 9.7.3.3 operator=() [2/2]

```
template<typename Network = UNetwork<>>
Collector& LinkPred::Collector< Network >::operator= (
    Collector< Network > const & that ) [default]
```

Copy assignment operator.

## Parameters

|             |                     |
|-------------|---------------------|
| <i>that</i> | The object to copy. |
|-------------|---------------------|

## 9.7.3.4 process()

```
template<typename Network = UNetwork<>>
bool LinkPred::Collector< Network >::process (
    typename Network::NodeID const & i ) [inline]
```

Node processing.

## Parameters

|          |                |
|----------|----------------|
| <i>i</i> | The node's ID. |
|----------|----------------|

The documentation for this class was generated from the following file:

- [include/linkpred/graphalg/traversal/graphtraversal.hpp](#)

## 9.8 LinkPred::CosineSim Class Reference

Cosine similarity.

```
#include <cosinesim.hpp>
```

Inheritance diagram for LinkPred::CosineSim:

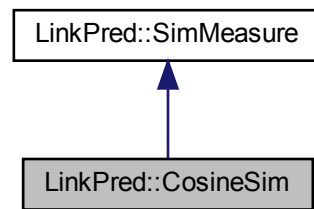

Collaboration diagram for LinkPred::CosineSim:

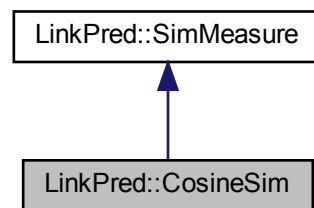

## Public Member Functions

- [CosineSim](#) ()
- [CosineSim](#) ([CosineSim](#) const &that)=default
- [CosineSim](#) & [operator=](#) ([CosineSim](#) const &that)=default
- [CosineSim](#) ([CosineSim](#) &&that)=default
- [CosineSim](#) & [operator=](#) ([CosineSim](#) &&that)=default
- virtual double [sim](#) ([Vec](#) const &v1, [Vec](#) const &v2)
- virtual [~CosineSim](#) ()=default

### 9.8.1 Detailed Description

Cosine similarity.

### 9.8.2 Constructor & Destructor Documentation

### 9.8.2.1 CosineSim() [1/3]

```
LinkPred::CosineSim::CosineSim ( ) [inline]
```

Constructor.

### 9.8.2.2 CosineSim() [2/3]

```
LinkPred::CosineSim::CosineSim (
    CosineSim const & that ) [default]
```

Copy constructor.

Parameters

|             |                     |
|-------------|---------------------|
| <i>that</i> | The object to copy. |
|-------------|---------------------|

### 9.8.2.3 CosineSim() [3/3]

```
LinkPred::CosineSim::CosineSim (
    CosineSim && that ) [default]
```

Move constructor.

Parameters

|             |                     |
|-------------|---------------------|
| <i>that</i> | The object to move. |
|-------------|---------------------|

### 9.8.2.4 ~CosineSim()

```
virtual LinkPred::CosineSim::~~CosineSim ( ) [virtual], [default]
```

Destructor.

## 9.8.3 Member Function Documentation

### 9.8.3.1 operator=() [1/2]

```
CosineSim& LinkPred::CosineSim::operator= (
    CosineSim && that ) [default]
```

Move assignment operator.

## Parameters

|             |                     |
|-------------|---------------------|
| <i>that</i> | The object to move. |
|-------------|---------------------|

**9.8.3.2 operator=()** [2/2]

```
CosineSim& LinkPred::CosineSim::operator= (
    CosineSim const & that ) [default]
```

Copy assignment operator.

## Parameters

|             |                     |
|-------------|---------------------|
| <i>that</i> | The object to copy. |
|-------------|---------------------|

**9.8.3.3 sim()**

```
virtual double LinkPred::CosineSim::sim (
    Vec const & v1,
    Vec const & v2 ) [virtual]
```

Compute the similarity between two vectors.

## Parameters

|           |                                                             |
|-----------|-------------------------------------------------------------|
| <i>v1</i> | First vector.                                               |
| <i>v2</i> | Second vector. Must be of the same dimension as <i>v1</i> . |

## Returns

The similarity between *v1* and *v2*.

Implements [LinkPred::SimMeasure](#).

The documentation for this class was generated from the following file:

- include/linkpred/ml/simmeasures/[cosinesim.hpp](#)

**9.9 LinkPred::Counter< Network > Class Template Reference**

A class that counts nodes during traversal.

```
#include <graphtraversal.hpp>
```

## Public Member Functions

- [Counter](#) ()=default
- [Counter](#) ([Counter](#) const &that)=default
- [Counter](#) & [operator=](#) ([Counter](#) const &that)=default
- [Counter](#) ([Counter](#) &&that)=default
- [Counter](#) & [operator=](#) ([Counter](#) &&that)=default
- bool [process](#) (typename Network::NodeID const &i)
- std::size\_t [getCount](#) () const
- void [resetCount](#) ()
- virtual [~Counter](#) ()=default

### 9.9.1 Detailed Description

```
template<typename Network = UNetwork<>>
class LinkPred::Counter< Network >
```

A class that counts nodes during traversal.

#### Template Parameters

|                |                   |
|----------------|-------------------|
| <i>Network</i> | The network type. |
|----------------|-------------------|

### 9.9.2 Constructor & Destructor Documentation

#### 9.9.2.1 Counter() [1/3]

```
template<typename Network = UNetwork<>>
LinkPred::Counter< Network >::Counter ( ) [default]
```

Constructor.

#### 9.9.2.2 Counter() [2/3]

```
template<typename Network = UNetwork<>>
LinkPred::Counter< Network >::Counter (
    Counter< Network > const & that ) [default]
```

Copy constructor.

#### Parameters

|             |                     |
|-------------|---------------------|
| <i>that</i> | The object to copy. |
|-------------|---------------------|

### 9.9.2.3 Counter() [3/3]

```
template<typename Network = UNetwork<>>
LinkPred::Counter< Network >::Counter (
    Counter< Network > && that ) [default]
```

Move constructor.

#### Parameters

|             |                     |
|-------------|---------------------|
| <i>that</i> | The object to move. |
|-------------|---------------------|

### 9.9.2.4 ~Counter()

```
template<typename Network = UNetwork<>>
virtual LinkPred::Counter< Network >::~~Counter ( ) [virtual], [default]
```

Destructor.

## 9.9.3 Member Function Documentation

### 9.9.3.1 getCount()

```
template<typename Network = UNetwork<>>
std::size_t LinkPred::Counter< Network >::getCount ( ) const [inline]
```

#### Returns

The nodes count.

### 9.9.3.2 operator=() [1/2]

```
template<typename Network = UNetwork<>>
Counter& LinkPred::Counter< Network >::operator= (
    Counter< Network > && that ) [default]
```

Move assignment operator.

## Parameters

|             |                     |
|-------------|---------------------|
| <i>that</i> | The object to move. |
|-------------|---------------------|

**9.9.3.3 operator=()** [2/2]

```
template<typename Network = UNetwork<>>
Counter& LinkPred::Counter< Network >::operator= (
    Counter< Network > const & that ) [default]
```

Copy assignment operator.

## Parameters

|             |                     |
|-------------|---------------------|
| <i>that</i> | The object to copy. |
|-------------|---------------------|

**9.9.3.4 process()**

```
template<typename Network = UNetwork<>>
bool LinkPred::Counter< Network >::process (
    typename Network::NodeID const & i ) [inline]
```

Node processing.

## Parameters

|          |                |
|----------|----------------|
| <i>i</i> | The node's ID. |
|----------|----------------|

**9.9.3.5 resetCount()**

```
template<typename Network = UNetwork<>>
void LinkPred::Counter< Network >::resetCount ( ) [inline]
```

Reset the nodes count to 0.

The documentation for this class was generated from the following file:

- [include/linkpred/graphalg/traversal/graphtraversal.hpp](#)

## 9.10 LinkPred::DADAPredictor< Network, EdgeRndIt, ScoreRndIt, EdgeRndOutIt > Class Template Reference

Common neighbor link predictor adapted to directed networks.

```
#include <dadapredictor.hpp>
```

Inheritance diagram for LinkPred::DADAPredictor< Network, EdgeRndIt, ScoreRndIt, EdgeRndOutIt >:

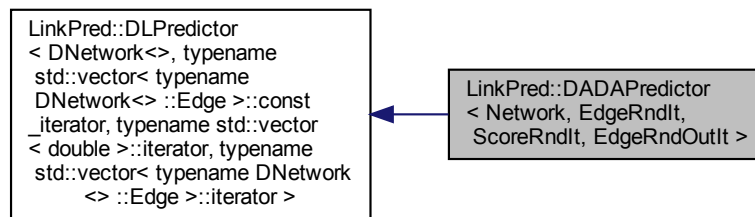

Collaboration diagram for LinkPred::DADAPredictor< Network, EdgeRndIt, ScoreRndIt, EdgeRndOutIt >:

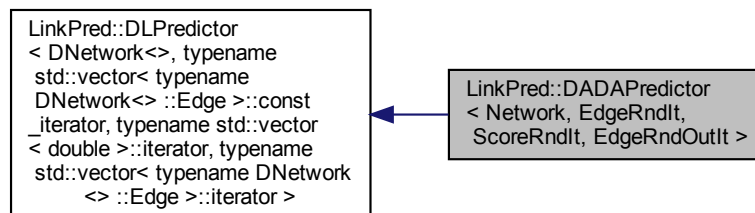

### Public Member Functions

- [DADAPredictor](#) (std::shared\_ptr< [Network](#) const > net)
- [DADAPredictor](#) ([DADAPredictor](#) const &that)=default
- [DADAPredictor](#) & [operator=](#) ([DADAPredictor](#) const &that)=default
- [DADAPredictor](#) ([DADAPredictor](#) &&that)=default
- [DADAPredictor](#) & [operator=](#) ([DADAPredictor](#) &&that)=default
- virtual void [init](#) ()
- virtual void [learn](#) ()
- virtual void [predict](#) ([EdgeRndIt](#) begin, [EdgeRndIt](#) end, [ScoreRndIt](#) scores)
- virtual double [score](#) ([Edge](#) const &e)
- virtual std::size\_t [top](#) (std::size\_t k, [EdgeRndOutIt](#) eit, [ScoreRndIt](#) sit)
- virtual [~DADAPredictor](#) ()=default



## Additional Inherited Members

### 9.10.1 Detailed Description

```
template<typename Network = DNetwork<>, typename EdgeRndIt = typename std::vector<typename Network::Edge>::const_iterator,
typename ScoreRndIt = typename std::vector<double>::iterator, typename EdgeRndOutIt = typename std::vector<typename Network::Edge>::iterator>
class LinkPred::DADAPredictor< Network, EdgeRndIt, ScoreRndIt, EdgeRndOutIt >
```

Common neighbor link predictor adapted to directed networks.

#### Template Parameters

|                   |                                                   |
|-------------------|---------------------------------------------------|
| <i>Network</i>    | The network type.                                 |
| <i>EdgeRndIt</i>  | A random iterator type used to iterate on edges.  |
| <i>ScoreRndIt</i> | A random iterator type used to iterate on scores. |

### 9.10.2 Constructor & Destructor Documentation

#### 9.10.2.1 DADAPredictor() [1/3]

```
template<typename Network = DNetwork<>, typename EdgeRndIt = typename std::vector<typename
Network::Edge>::const_iterator, typename ScoreRndIt = typename std::vector<double>::iterator,
typename EdgeRndOutIt = typename std::vector<typename Network::Edge>::iterator>
LinkPred::DADAPredictor< Network, EdgeRndIt, ScoreRndIt, EdgeRndOutIt >::DADAPredictor (
    std::shared_ptr< Network const > net ) [inline]
```

#### Parameters

|            |              |
|------------|--------------|
| <i>net</i> | The network. |
|------------|--------------|

#### 9.10.2.2 DADAPredictor() [2/3]

```
template<typename Network = DNetwork<>, typename EdgeRndIt = typename std::vector<typename
Network::Edge>::const_iterator, typename ScoreRndIt = typename std::vector<double>::iterator,
typename EdgeRndOutIt = typename std::vector<typename Network::Edge>::iterator>
LinkPred::DADAPredictor< Network, EdgeRndIt, ScoreRndIt, EdgeRndOutIt >::DADAPredictor (
    DADAPredictor< Network, EdgeRndIt, ScoreRndIt, EdgeRndOutIt > const & that )
[default]
```

Copy constructor.

## Parameters

|             |                     |
|-------------|---------------------|
| <i>that</i> | The object to copy. |
|-------------|---------------------|

**9.10.2.3 DADAPredictor()** [3/3]

```
template<typename Network = DNetwork<>, typename EdgeRndIt = typename std::vector<typename
Network::Edge>::const_iterator, typename ScoreRndIt = typename std::vector<double>::iterator,
typename EdgeRndOutIt = typename std::vector<typename Network::Edge>::iterator>
LinkPred::DADAPredictor< Network, EdgeRndIt, ScoreRndIt, EdgeRndOutIt >::DADAPredictor (
    DADAPredictor< Network, EdgeRndIt, ScoreRndIt, EdgeRndOutIt > && that ) [default]
```

Move constructor.

## Parameters

|             |                     |
|-------------|---------------------|
| <i>that</i> | The object to move. |
|-------------|---------------------|

**9.10.2.4 ~DADAPredictor()**

```
template<typename Network = DNetwork<>, typename EdgeRndIt = typename std::vector<typename
Network::Edge>::const_iterator, typename ScoreRndIt = typename std::vector<double>::iterator,
typename EdgeRndOutIt = typename std::vector<typename Network::Edge>::iterator>
virtual LinkPred::DADAPredictor< Network, EdgeRndIt, ScoreRndIt, EdgeRndOutIt >::~~DADAPredictor
( ) [virtual], [default]
```

Destructor.

**9.10.3 Member Function Documentation****9.10.3.1 init()**

```
template<typename Network = DNetwork<>, typename EdgeRndIt = typename std::vector<typename
Network::Edge>::const_iterator, typename ScoreRndIt = typename std::vector<double>::iterator,
typename EdgeRndOutIt = typename std::vector<typename Network::Edge>::iterator>
virtual void LinkPred::DADAPredictor< Network, EdgeRndIt, ScoreRndIt, EdgeRndOutIt >::init ( )
[inline], [virtual]
```

Initialize the solver.

Implements [LinkPred::DLPredictor< DNetwork<>, typename std::vector< typename DNetwork<> ::Edge >::const\\_iterator, typena](#)

### 9.10.3.2 learn()

```
template<typename Network = DNetwork<>, typename EdgeRndIt = typename std::vector<typename
Network::Edge>::const_iterator, typename ScoreRndIt = typename std::vector<double>::iterator,
typename EdgeRndOutIt = typename std::vector<typename Network::Edge>::iterator>
virtual void LinkPred::DADAPredictor< Network, EdgeRndIt, ScoreRndIt, EdgeRndOutIt >::learn (
) [inline], [virtual]
```

Learn.

Implements [LinkPred::DLPredictor< DNetwork<>, typename std::vector< typename DNetwork<> ::Edge >::const\\_iterator, typen](#)

### 9.10.3.3 operator=() [1/2]

```
template<typename Network = DNetwork<>, typename EdgeRndIt = typename std::vector<typename
Network::Edge>::const_iterator, typename ScoreRndIt = typename std::vector<double>::iterator,
typename EdgeRndOutIt = typename std::vector<typename Network::Edge>::iterator>
DADAPredictor& LinkPred::DADAPredictor< Network, EdgeRndIt, ScoreRndIt, EdgeRndOutIt >::operator=
(
    DADAPredictor< Network, EdgeRndIt, ScoreRndIt, EdgeRndOutIt > && that ) [default]
```

Move assignment operator.

#### Parameters

|             |                     |
|-------------|---------------------|
| <i>that</i> | The object to move. |
|-------------|---------------------|

### 9.10.3.4 operator=() [2/2]

```
template<typename Network = DNetwork<>, typename EdgeRndIt = typename std::vector<typename
Network::Edge>::const_iterator, typename ScoreRndIt = typename std::vector<double>::iterator,
typename EdgeRndOutIt = typename std::vector<typename Network::Edge>::iterator>
DADAPredictor& LinkPred::DADAPredictor< Network, EdgeRndIt, ScoreRndIt, EdgeRndOutIt >::operator=
(
    DADAPredictor< Network, EdgeRndIt, ScoreRndIt, EdgeRndOutIt > const & that )
[default]
```

Copy assignment operator.

#### Parameters

|             |                     |
|-------------|---------------------|
| <i>that</i> | The object to copy. |
|-------------|---------------------|

### 9.10.3.5 predict()

```
template<typename Network = DNetwork<>, typename EdgeRndIt = typename std::vector<typename
Network::Edge>::const_iterator, typename ScoreRndIt = typename std::vector<double>::iterator,
typename EdgeRndOutIt = typename std::vector<typename Network::Edge>::iterator>
virtual void LinkPred::DADAPredictor< Network, EdgeRndIt, ScoreRndIt, EdgeRndOutIt >::predict
(
    EdgeRndIt begin,
    EdgeRndIt end,
    ScoreRndIt scores ) [virtual]
```

Predict the links.

#### Parameters

|               |                                         |
|---------------|-----------------------------------------|
| <i>begin</i>  | Beginning of the links to be predicted. |
| <i>end</i>    | end of the links to be predicted.       |
| <i>scores</i> | Beginning of scores.                    |

Reimplemented from [LinkPred::DLPredictor< DNetwork<>, typename std::vector< typename DNetwork<> ::Edge >::const\\_iterator](#)

### 9.10.3.6 score()

```
template<typename Network = DNetwork<>, typename EdgeRndIt = typename std::vector<typename
Network::Edge>::const_iterator, typename ScoreRndIt = typename std::vector<double>::iterator,
typename EdgeRndOutIt = typename std::vector<typename Network::Edge>::iterator>
virtual double LinkPred::DADAPredictor< Network, EdgeRndIt, ScoreRndIt, EdgeRndOutIt >::score
(
    Edge const & e ) [virtual]
```

Compute the score of a single edge.

#### Parameters

|          |           |
|----------|-----------|
| <i>e</i> | The edge. |
|----------|-----------|

#### Returns

The score of e.

### 9.10.3.7 top()

```
template<typename Network = DNetwork<>, typename EdgeRndIt = typename std::vector<typename
Network::Edge>::const_iterator, typename ScoreRndIt = typename std::vector<double>::iterator,
typename EdgeRndOutIt = typename std::vector<typename Network::Edge>::iterator>
```

```
virtual std::size_t LinkPred::DADAPredictor< Network, EdgeRndIt, ScoreRndIt, EdgeRndOutIt >↵
::top (
    std::size_t k,
    EdgeRndOutIt eit,
    ScoreRndIt sit ) [virtual]
```

Finds the k negative edges with the top score. Ties are broken randomly.

#### Parameters

|            |                                                                                                         |
|------------|---------------------------------------------------------------------------------------------------------|
| <i>k</i>   | The number of edges to find.                                                                            |
| <i>eit</i> | An output iterator where the edges are written.                                                         |
| <i>sit</i> | An output iterator where the scores are written. The scores are written in the same order as the edges. |

#### Returns

The number of negative edges inserted. It is the minimum between k and the number of negative edges in the network.

Reimplemented from [LinkPred::DLPredictor< DNetwork<>, typename std::vector< typename DNetwork<> ::Edge >::const\\_iterator](#)

The documentation for this class was generated from the following file:

- [include/linkpred/predictors/directed/dadapredictor.hpp](#)

## 9.11 LinkPred::DCNEPredictor< Network, EdgeRndIt, ScoreRndIt, EdgeRndOutIt > Class Template Reference

Common neighbor link predictor adapted to directed networks.

```
#include <dcnepredictor.hpp>
```

Inheritance diagram for LinkPred::DCNEPredictor< Network, EdgeRndIt, ScoreRndIt, EdgeRndOutIt >:

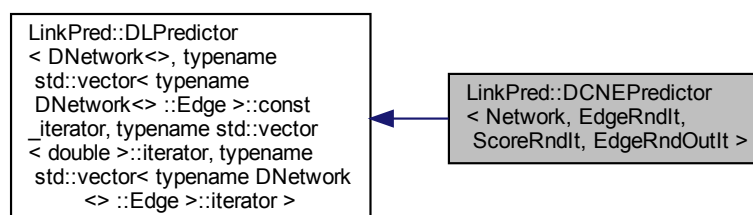

Collaboration diagram for LinkPred::DCNEPredictor< Network, EdgeRndIt, ScoreRndIt, EdgeRndOutIt >:

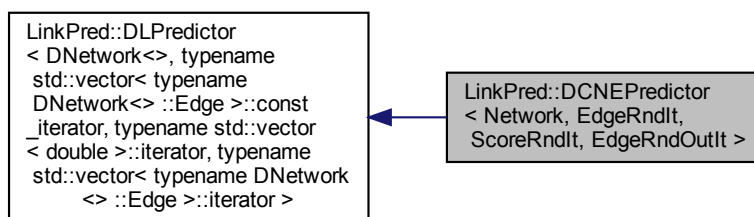

## Public Member Functions

- [DCNEPredictor](#) (std::shared\_ptr< [Network](#) const > net)
- [DCNEPredictor](#) ([DCNEPredictor](#) const &that)=default
- [DCNEPredictor](#) & operator= ([DCNEPredictor](#) const &that)=default
- [DCNEPredictor](#) ([DCNEPredictor](#) &&that)=default
- [DCNEPredictor](#) & operator= ([DCNEPredictor](#) &&that)=default
- virtual void [init](#) ()
- virtual void [learn](#) ()
- virtual void [predict](#) ([EdgeRndIt](#) begin, [EdgeRndIt](#) end, [ScoreRndIt](#) scores)
- virtual double [score](#) ([Edge](#) const &e)
- virtual std::size\_t [top](#) (std::size\_t k, [EdgeRndOutIt](#) eit, [ScoreRndIt](#) sit)
- virtual [~DCNEPredictor](#) ()=default

## Additional Inherited Members

### 9.11.1 Detailed Description

```

template<typename Network = DNetwork<>, typename EdgeRndIt = typename std::vector<typename Network::Edge>::const_iterator,
        typename ScoreRndIt = typename std::vector<double>::iterator, typename EdgeRndOutIt = typename std::vector<typename Network::Edge>::iterator>
class LinkPred::DCNEPredictor< Network, EdgeRndIt, ScoreRndIt, EdgeRndOutIt >
  
```

Common neighbor link predictor adapted to directed networks.

#### Template Parameters

|                              |                                                   |
|------------------------------|---------------------------------------------------|
| <i>Network</i>               | The network type.                                 |
| <i>Edge</i><br><i>RndIt</i>  | A random iterator type used to iterate on edges.  |
| <i>Score</i><br><i>RndIt</i> | A random iterator type used to iterate on scores. |

## 9.11.2 Constructor & Destructor Documentation

### 9.11.2.1 DCNEPredictor() [1/3]

```
template<typename Network = DNetwork<>, typename EdgeRndIt = typename std::vector<typename
Network::Edge>::const_iterator, typename ScoreRndIt = typename std::vector<double>::iterator,
typename EdgeRndOutIt = typename std::vector<typename Network::Edge>::iterator>
LinkPred::DCNEPredictor< Network, EdgeRndIt, ScoreRndIt, EdgeRndOutIt >::DCNEPredictor (
    std::shared_ptr< Network const > net ) [inline]
```

#### Parameters

|            |              |
|------------|--------------|
| <i>net</i> | The network. |
|------------|--------------|

### 9.11.2.2 DCNEPredictor() [2/3]

```
template<typename Network = DNetwork<>, typename EdgeRndIt = typename std::vector<typename
Network::Edge>::const_iterator, typename ScoreRndIt = typename std::vector<double>::iterator,
typename EdgeRndOutIt = typename std::vector<typename Network::Edge>::iterator>
LinkPred::DCNEPredictor< Network, EdgeRndIt, ScoreRndIt, EdgeRndOutIt >::DCNEPredictor (
    DCNEPredictor< Network, EdgeRndIt, ScoreRndIt, EdgeRndOutIt > const & that )
[default]
```

Copy constructor.

#### Parameters

|             |                     |
|-------------|---------------------|
| <i>that</i> | The object to copy. |
|-------------|---------------------|

### 9.11.2.3 DCNEPredictor() [3/3]

```
template<typename Network = DNetwork<>, typename EdgeRndIt = typename std::vector<typename
Network::Edge>::const_iterator, typename ScoreRndIt = typename std::vector<double>::iterator,
typename EdgeRndOutIt = typename std::vector<typename Network::Edge>::iterator>
LinkPred::DCNEPredictor< Network, EdgeRndIt, ScoreRndIt, EdgeRndOutIt >::DCNEPredictor (
    DCNEPredictor< Network, EdgeRndIt, ScoreRndIt, EdgeRndOutIt > && that ) [default]
```

Move constructor.

#### Parameters

|             |                     |
|-------------|---------------------|
| <i>that</i> | The object to move. |
|-------------|---------------------|

#### 9.11.2.4 ~DCNEPredictor()

```
template<typename Network = DNetwork<>, typename EdgeRndIt = typename std::vector<typename
Network::Edge>::const_iterator, typename ScoreRndIt = typename std::vector<double>::iterator,
typename EdgeRndOutIt = typename std::vector<typename Network::Edge>::iterator>
virtual LinkPred::DCNEPredictor< Network, EdgeRndIt, ScoreRndIt, EdgeRndOutIt >::~~DCNEPredictor
( ) [virtual], [default]
```

Destructor.

### 9.11.3 Member Function Documentation

#### 9.11.3.1 init()

```
template<typename Network = DNetwork<>, typename EdgeRndIt = typename std::vector<typename
Network::Edge>::const_iterator, typename ScoreRndIt = typename std::vector<double>::iterator,
typename EdgeRndOutIt = typename std::vector<typename Network::Edge>::iterator>
virtual void LinkPred::DCNEPredictor< Network, EdgeRndIt, ScoreRndIt, EdgeRndOutIt >::init ( )
[inline], [virtual]
```

Initialize the solver.

Implements [LinkPred::DLPredictor< DNetwork<>, typename std::vector< typename DNetwork<> ::Edge >::const\\_iterator, typen](#)

#### 9.11.3.2 learn()

```
template<typename Network = DNetwork<>, typename EdgeRndIt = typename std::vector<typename
Network::Edge>::const_iterator, typename ScoreRndIt = typename std::vector<double>::iterator,
typename EdgeRndOutIt = typename std::vector<typename Network::Edge>::iterator>
virtual void LinkPred::DCNEPredictor< Network, EdgeRndIt, ScoreRndIt, EdgeRndOutIt >::learn (
) [inline], [virtual]
```

Learn.

Implements [LinkPred::DLPredictor< DNetwork<>, typename std::vector< typename DNetwork<> ::Edge >::const\\_iterator, typen](#)

#### 9.11.3.3 operator=() [1/2]

```
template<typename Network = DNetwork<>, typename EdgeRndIt = typename std::vector<typename
Network::Edge>::const_iterator, typename ScoreRndIt = typename std::vector<double>::iterator,
typename EdgeRndOutIt = typename std::vector<typename Network::Edge>::iterator>
DCNEPredictor& LinkPred::DCNEPredictor< Network, EdgeRndIt, ScoreRndIt, EdgeRndOutIt >::operator=
(
    DCNEPredictor< Network, EdgeRndIt, ScoreRndIt, EdgeRndOutIt > && that ) [default]
```

Move assignment operator.



## Parameters

|             |                     |
|-------------|---------------------|
| <i>that</i> | The object to move. |
|-------------|---------------------|

## 9.11.3.4 operator=() [2/2]

```
template<typename Network = DNetwork<>, typename EdgeRndIt = typename std::vector<typename
Network::Edge>::const_iterator, typename ScoreRndIt = typename std::vector<double>::iterator,
typename EdgeRndOutIt = typename std::vector<typename Network::Edge>::iterator>
DCNEPredictor& LinkPred::DCNEPredictor< Network, EdgeRndIt, ScoreRndIt, EdgeRndOutIt >::operator=
(
    DCNEPredictor< Network, EdgeRndIt, ScoreRndIt, EdgeRndOutIt > const & that )
[default]
```

Copy assignment operator.

## Parameters

|             |                     |
|-------------|---------------------|
| <i>that</i> | The object to copy. |
|-------------|---------------------|

## 9.11.3.5 predict()

```
template<typename Network = DNetwork<>, typename EdgeRndIt = typename std::vector<typename
Network::Edge>::const_iterator, typename ScoreRndIt = typename std::vector<double>::iterator,
typename EdgeRndOutIt = typename std::vector<typename Network::Edge>::iterator>
virtual void LinkPred::DCNEPredictor< Network, EdgeRndIt, ScoreRndIt, EdgeRndOutIt >::predict
(
    EdgeRndIt begin,
    EdgeRndIt end,
    ScoreRndIt scores ) [virtual]
```

Predict the links.

## Parameters

|               |                                         |
|---------------|-----------------------------------------|
| <i>begin</i>  | Beginning of the links to be predicted. |
| <i>end</i>    | end of the links to be predicted.       |
| <i>scores</i> | Beginning of scores.                    |

Reimplemented from [LinkPred::DLPredictor< DNetwork<>, typename std::vector< typename DNetwork<> ::Edge >::const\\_iterator](#)

## 9.11.3.6 score()

```
template<typename Network = DNetwork<>, typename EdgeRndIt = typename std::vector<typename
Network::Edge>::const_iterator, typename ScoreRndIt = typename std::vector<double>::iterator,
```

```

typename EdgeRndOutIt = typename std::vector<typename Network::Edge>::iterator>
virtual double LinkPred::DCNEPredictor< Network, EdgeRndIt, ScoreRndIt, EdgeRndOutIt >::score
(
    Edge const & e ) [virtual]

```

Compute the score of a single edge.

#### Parameters

|          |           |
|----------|-----------|
| <i>e</i> | The edge. |
|----------|-----------|

#### Returns

The score of *e*.

### 9.11.3.7 top()

```

template<typename Network = DNetwork<>, typename EdgeRndIt = typename std::vector<typename
Network::Edge>::const_iterator, typename ScoreRndIt = typename std::vector<double>::iterator,
typename EdgeRndOutIt = typename std::vector<typename Network::Edge>::iterator>
virtual std::size_t LinkPred::DCNEPredictor< Network, EdgeRndIt, ScoreRndIt, EdgeRndOutIt >↔
::top (
    std::size_t k,
    EdgeRndOutIt eit,
    ScoreRndIt sit ) [virtual]

```

Finds the *k* negative edges with the top score. Ties are broken randomly.

#### Parameters

|            |                                                                                                         |
|------------|---------------------------------------------------------------------------------------------------------|
| <i>k</i>   | The number of edges to find.                                                                            |
| <i>eit</i> | An output iterator where the edges are written.                                                         |
| <i>sit</i> | An output iterator where the scores are written. The scores are written in the same order as the edges. |

#### Returns

The number of negative edges inserted. It is the minimum between *k* and the number of negative edges in the network.

Reimplemented from [LinkPred::DLPredictor< DNetwork<>, typename std::vector< typename DNetwork<> ::Edge >::const\\_iterator>](#)

The documentation for this class was generated from the following file:

- [include/linkpred/predictors/directed/dcnepredictor.hpp](#)

## 9.12 LinkPred::DeepWalk< Network > Class Template Reference

[DeepWalk](#) encoder. Reference: Perozzi, B., Al-Rfou, R., and Skiena, S. (2014). Deepwalk: Online learning of social representations. In Proceedings of the 20th ACM SIGKDD International Conference on Knowledge Discovery and Data Mining, KDD '14, pages 701–710, New York, NY, USA. Association for Computing Machinery. This implementation is based on the code <https://github.com/xgfs/deepwalk-c>.

```
#include <deepwalk.hpp>
```

Inheritance diagram for LinkPred::DeepWalk< Network >:

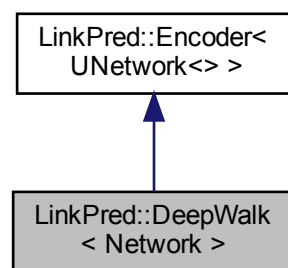

Collaboration diagram for LinkPred::DeepWalk< Network >:

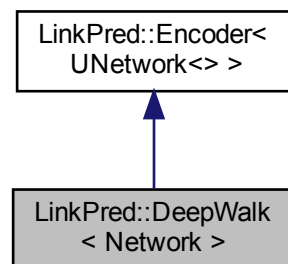

### Public Member Functions

- [DeepWalk](#) (std::shared\_ptr< Network const > net, long int seed)
- [DeepWalk](#) ([DeepWalk](#) const &that)=default
- [DeepWalk](#) & operator= ([DeepWalk](#) const &that)=default
- [DeepWalk](#) ([DeepWalk](#) &&that)=default
- [DeepWalk](#) & operator= ([DeepWalk](#) &&that)=default
- virtual void [init](#) ()

- virtual void `encode` ()
- float `getInitLR` () const
- void `setInitLR` (float initLR)
- int `getNbWalks` () const
- void `setNbWalks` (int nbWalks)
- int `getWalkLength` () const
- void `setWalkLength` (int walkLength)
- int `getWindowSize` () const
- void `setWindowSize` (int windowSize)
- virtual void `setWeightMap` (const `WeightMapSP` &weightMap)
- float `getAlpha` () const
- void `setAlpha` (float alpha)
- const int `getMaxCodeLength` () const
- int `getNbNodeWalks` () const
- void `setNbNodeWalks` (int nbNodeWalks)
- long long `getStepInterval` () const
- void `setStepInterval` (long long stepInterval)
- long long `getTotalSteps` () const
- const int `getDefaultDim` () const
- virtual `~DeepWalk` ()=default

## Additional Inherited Members

### 9.12.1 Detailed Description

```
template<typename Network = UNetwork<>>
class LinkPred::DeepWalk< Network >
```

`DeepWalk` encoder. Reference: Perozzi, B., Al-Rfou, R., and Skiena, S. (2014). Deepwalk: Online learning of social representations. In Proceedings of the 20th ACM SIGKDD International Conference on Knowledge Discovery and Data Mining, KDD '14, pages 701–710, New York, NY, USA. Association for Computing Machinery. This implementation is based on the code <https://github.com/xgfs/deepwalk-c>.

#### Template Parameters

|                |                   |
|----------------|-------------------|
| <i>Network</i> | The network type. |
|----------------|-------------------|

### 9.12.2 Constructor & Destructor Documentation

#### 9.12.2.1 `DeepWalk()` [1/3]

```
template<typename Network = UNetwork<>>
LinkPred::DeepWalk< Network >::DeepWalk (
    std::shared_ptr< Network const > net,
    long int seed ) [inline]
```

Constructor.

## Parameters

|             |                               |
|-------------|-------------------------------|
| <i>net</i>  | The network.                  |
| <i>seed</i> | Random number generator seed. |

**9.12.2.2 DeepWalk()** [2/3]

```
template<typename Network = UNetwork<>>
LinkPred::DeepWalk< Network >::DeepWalk (
    DeepWalk< Network > const & that ) [default]
```

Copy constructor.

## Parameters

|             |                     |
|-------------|---------------------|
| <i>that</i> | The object to copy. |
|-------------|---------------------|

**9.12.2.3 DeepWalk()** [3/3]

```
template<typename Network = UNetwork<>>
LinkPred::DeepWalk< Network >::DeepWalk (
    DeepWalk< Network > && that ) [default]
```

Move constructor.

## Parameters

|             |                     |
|-------------|---------------------|
| <i>that</i> | The object to move. |
|-------------|---------------------|

**9.12.2.4 ~DeepWalk()**

```
template<typename Network = UNetwork<>>
virtual LinkPred::DeepWalk< Network >::~~DeepWalk ( ) [virtual], [default]
```

Destructor.

**9.12.3 Member Function Documentation**

### 9.12.3.1 encode()

```
template<typename Network = UNetwork<>>
virtual void LinkPred::DeepWalk< Network >::encode ( ) [virtual]
```

Encode the network.

Implements [LinkPred::Encoder< UNetwork<> >](#).

### 9.12.3.2 getAlpha()

```
template<typename Network = UNetwork<>>
float LinkPred::DeepWalk< Network >::getAlpha ( ) const [inline]
```

#### Returns

The probability of continuing random walk in initialization.

### 9.12.3.3 getDefaultDim()

```
template<typename Network = UNetwork<>>
const int LinkPred::DeepWalk< Network >::getDefaultDim ( ) const [inline]
```

#### Returns

Default embedding dimension.

### 9.12.3.4 getInitLR()

```
template<typename Network = UNetwork<>>
float LinkPred::DeepWalk< Network >::getInitLR ( ) const [inline]
```

#### Returns

Initial learning rate.

### 9.12.3.5 getMaxCodeLength()

```
template<typename Network = UNetwork<>>
const int LinkPred::DeepWalk< Network >::getMaxCodeLength ( ) const [inline]
```

#### Returns

Maximum code length.

### 9.12.3.6 getNbNodeWalks()

```
template<typename Network = UNetwork<>>
int LinkPred::DeepWalk< Network >::getNbNodeWalks ( ) const [inline]
```

#### Returns

The number of walks per node in the PageRank initialization.

### 9.12.3.7 getNbWalks()

```
template<typename Network = UNetwork<>>
int LinkPred::DeepWalk< Network >::getNbWalks ( ) const [inline]
```

#### Returns

Number of walks per vertex ("gamma").

### 9.12.3.8 getStepInterval()

```
template<typename Network = UNetwork<>>
long long LinkPred::DeepWalk< Network >::getStepInterval ( ) const [inline]
```

#### Returns

The number of steps after which the learning rate is updated.

### 9.12.3.9 getTotalSteps()

```
template<typename Network = UNetwork<>>
long long LinkPred::DeepWalk< Network >::getTotalSteps ( ) const [inline]
```

#### Returns

The total number of steps.

### 9.12.3.10 getWalkLength()

```
template<typename Network = UNetwork<>>
int LinkPred::DeepWalk< Network >::getWalkLength ( ) const [inline]
```

#### Returns

[DeepWalk](#) parameter "t" = length of the walk.

### 9.12.3.11 getWindowSize()

```
template<typename Network = UNetwork<>>
int LinkPred::DeepWalk< Network >::getWindowSize ( ) const [inline]
```

#### Returns

[DeepWalk](#) parameter "w" = window size.

### 9.12.3.12 init()

```
template<typename Network = UNetwork<>>
virtual void LinkPred::DeepWalk< Network >::init ( ) [virtual]
```

Initialize encoder.

Implements [LinkPred::Encoder< UNetwork<>>](#) .

### 9.12.3.13 operator=() [1/2]

```
template<typename Network = UNetwork<>>
DeepWalk& LinkPred::DeepWalk< Network >::operator= (
    DeepWalk< Network > && that ) [default]
```

Move assignment operator.



## Parameters

|             |                     |
|-------------|---------------------|
| <i>that</i> | The object to move. |
|-------------|---------------------|

**9.12.3.14 operator=()** [2/2]

```
template<typename Network = UNetwork<>>
DeepWalk& LinkPred::DeepWalk< Network >::operator= (
    DeepWalk< Network > const & that ) [default]
```

Copy assignment operator.

## Parameters

|             |                     |
|-------------|---------------------|
| <i>that</i> | The object to copy. |
|-------------|---------------------|

**9.12.3.15 setAlpha()**

```
template<typename Network = UNetwork<>>
void LinkPred::DeepWalk< Network >::setAlpha (
    float alpha ) [inline]
```

Set the probability of continuing random walk in initialization.

## Parameters

|              |                                                          |
|--------------|----------------------------------------------------------|
| <i>alpha</i> | Probability of continuing random walk in initialization. |
|--------------|----------------------------------------------------------|

**9.12.3.16 setInitLR()**

```
template<typename Network = UNetwork<>>
void LinkPred::DeepWalk< Network >::setInitLR (
    float initLR ) [inline]
```

Set the initial learning rate.

## Parameters

|               |                        |
|---------------|------------------------|
| <i>initLR</i> | Initial learning rate. |
|---------------|------------------------|

**9.12.3.17 setNbNodeWalks()**

```
template<typename Network = UNetwork<>>
void LinkPred::DeepWalk< Network >::setNbNodeWalks (
    int nbNodeWalks ) [inline]
```

Set the number of walks per node in the PageRank initialization.

**Parameters**

|                    |                                                              |
|--------------------|--------------------------------------------------------------|
| <i>nbNodeWalks</i> | The number of walks per node in the PageRank initialization. |
|--------------------|--------------------------------------------------------------|

**9.12.3.18 setNbWalks()**

```
template<typename Network = UNetwork<>>
void LinkPred::DeepWalk< Network >::setNbWalks (
    int nbWalks ) [inline]
```

Set the number of walks per vertex (" $\gamma$ ").

**Parameters**

|                |                                            |
|----------------|--------------------------------------------|
| <i>nbWalks</i> | Number of walks per vertex (" $\gamma$ "). |
|----------------|--------------------------------------------|

**9.12.3.19 setStepInterval()**

```
template<typename Network = UNetwork<>>
void LinkPred::DeepWalk< Network >::setStepInterval (
    long long stepInterval ) [inline]
```

Set the number of steps after which the learning rate is updated.

**Parameters**

|                     |                                                           |
|---------------------|-----------------------------------------------------------|
| <i>stepInterval</i> | Number of steps after which the learning rate is updated. |
|---------------------|-----------------------------------------------------------|

**9.12.3.20 setWalkLength()**

```
template<typename Network = UNetwork<>>
void LinkPred::DeepWalk< Network >::setWalkLength (
    int walkLength ) [inline]
```

Set the [DeepWalk](#) parameter " $t$ " = length of the walk.

## Parameters

|                   |                                                              |
|-------------------|--------------------------------------------------------------|
| <i>walkLength</i> | <a href="#">DeepWalk</a> parameter "t" = length of the walk. |
|-------------------|--------------------------------------------------------------|

**9.12.3.21 setWeightMap()**

```
template<typename Network = UNetwork<>>
virtual void LinkPred::DeepWalk< Network >::setWeightMap (
    const WeightMapSP & weightMap ) [inline], [virtual]
```

Set edge weight map.

Reimplemented from [LinkPred::Encoder< UNetwork<> >](#).

**9.12.3.22 setWindowSize()**

```
template<typename Network = UNetwork<>>
void LinkPred::DeepWalk< Network >::setWindowSize (
    int windowSize ) [inline]
```

Set the [DeepWalk](#) parameter "w" = window size.

## Parameters

|                   |                                                       |
|-------------------|-------------------------------------------------------|
| <i>windowSize</i> | <a href="#">DeepWalk</a> parameter "w" = window size. |
|-------------------|-------------------------------------------------------|

The documentation for this class was generated from the following file:

- include/linkpred/graphalg/encoders/deepwalk/[deepwalk.hpp](#)

## 9.13 LinkPred::DESPLDistCalculator< Network, DistType, NbHopsType > Class Template Reference

Exact shortest path distance calculator on a directed network with limits on the number of hops.

```
#include <netdistcalculator.hpp>
```

Inheritance diagram for LinkPred::DESPLDistCalculator< Network, DistType, NbHopsType >:

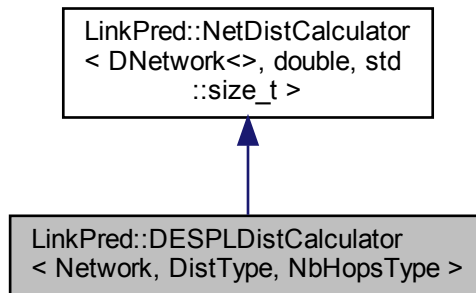

Collaboration diagram for LinkPred::DESPLDistCalculator< Network, DistType, NbHopsType >:

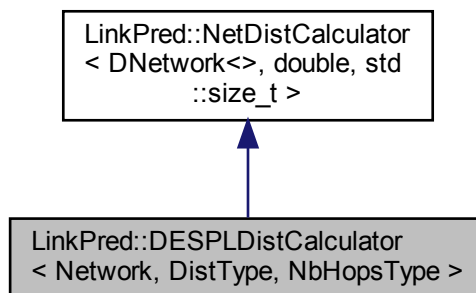

## Public Types

- using [LengthMapIdType](#) = typename [NetDistCalculator](#)< Network, DistType, NbHopsType >::LengthMapIdType
- using [NetworkSP](#) = typename [NetDistCalculator](#)< Network, DistType, NbHopsType >::NetworkSP
- using [NodeID](#) = typename [NetDistCalculator](#)< Network, DistType, NbHopsType >::NodeID
- using [Label](#) = typename [NetDistCalculator](#)< Network, DistType, NbHopsType >::Label
- using [Edge](#) = typename [NetDistCalculator](#)< Network, DistType, NbHopsType >::Edge
- using [NodeDistMap](#) = typename [NetDistCalculator](#)< Network, DistType, NbHopsType >::NodeDistMap
- using [NodeDistMapSP](#) = typename [NetDistCalculator](#)< Network, DistType, NbHopsType >::NodeDistMapSP
- using [NodeSDistMap](#) = typename Network::template NodeSMap< std::pair< DistType, NbHopsType > >
- using [NodeSDistMapSP](#) = typename Network::template NodeSMapSP< std::pair< DistType, NbHopsType > >
- using [EdgeLengthMap](#) = typename [NetDistCalculator](#)< Network, DistType, NbHopsType >::EdgeLengthMap
- using [EdgeLengthMapSP](#) = typename [NetDistCalculator](#)< Network, DistType, NbHopsType >::EdgeLengthMapSP

## Public Member Functions

- [DESPLDistCalculator](#) ([Dijkstra](#)< Network, DistType, NbHopsType > &dijkstra, [EdgeLengthMapSP](#) length, std::size\_t lim, [CacheLevel](#) cacheLevel=CacheLevel::NetworkCache)
- [DESPLDistCalculator](#) ([DESPLDistCalculator](#) const &that)=default
- [DESPLDistCalculator](#) & operator= ([DESPLDistCalculator](#) const &that)=default
- [DESPLDistCalculator](#) ([DESPLDistCalculator](#) &&that)=default
- [DESPLDistCalculator](#) & operator= ([DESPLDistCalculator](#) &&that)=default
- virtual std::pair< DistType, NbHopsType > [getDist](#) ([NodeID](#) const &i, [NodeID](#) const &j)
- virtual std::pair< DistType, NbHopsType > [getIndDist](#) ([NodeID](#) const &i, [NodeID](#) const &j)
- virtual [NodeDistMapSP](#) [getDist](#) ([NodeID](#) const &i)
- virtual [NodeSDistMapSP](#) [getSDistMap](#) ([NodeID](#) const &i)
- virtual [NodeSDistMapSP](#) [getFinDistMapNoNeighb](#) ([NodeID](#) const &srcNode)
- virtual std::pair< DistType, NbHopsType > [getDist](#) ([Edge](#) const &e)
- std::size\_t [getMaxNbNodesInCache](#) () const
- void [setMaxNbNodesInCache](#) (std::size\_t maxNbNodesInCache)
- std::size\_t [getLim](#) () const
- virtual ~ [DESPLDistCalculator](#) ()

### 9.13.1 Detailed Description

```
template<typename Network = DNetwork<>, typename DistType = double, typename NbHopsType = std::size_t>
class LinkPred::DESPLDistCalculator< Network, DistType, NbHopsType >
```

Exact shortest path distance calculator on a directed network with limits on the number of hops.

This class offers an additional layer over [Dijkstra](#) which provides memory management functionalities by caching computed distances.

#### Template Parameters

|                   |                                                               |
|-------------------|---------------------------------------------------------------|
| <i>Network</i>    | The network type.                                             |
| <i>DistType</i>   | The distance type (can be an integer or floating point type). |
| <i>NbHopsType</i> | The type of the number of hops (must be an integer type).     |

### 9.13.2 Member Typedef Documentation

#### 9.13.2.1 Edge

```
template<typename Network = DNetwork<>, typename DistType = double, typename NbHopsType =
std::size_t>
using LinkPred::DESPLDistCalculator< Network, DistType, NbHopsType >::Edge = typename NetDistCalculator<Network,
DistType, NbHopsType>::Edge
```

Edge type.

### 9.13.2.2 EdgeLengthMap

```
template<typename Network = DNetwork<>, typename DistType = double, typename NbHopsType =
std::size_t>
using LinkPred::DESPLDistCalculator< Network, DistType, NbHopsType >::EdgeLengthMap = typename
NetDistCalculator<Network, DistType, NbHopsType>::EdgeLengthMap
```

Edge length map.

### 9.13.2.3 EdgeLengthMapSP

```
template<typename Network = DNetwork<>, typename DistType = double, typename NbHopsType =
std::size_t>
using LinkPred::DESPLDistCalculator< Network, DistType, NbHopsType >::EdgeLengthMapSP = typename
NetDistCalculator<Network, DistType, NbHopsType>::EdgeLengthMapSP
```

Shared pointer to an edge length map.

### 9.13.2.4 Label

```
template<typename Network = DNetwork<>, typename DistType = double, typename NbHopsType =
std::size_t>
using LinkPred::DESPLDistCalculator< Network, DistType, NbHopsType >::Label = typename NetDistCalculator<Network,
DistType, NbHopsType>::Label
```

Nodes label type.

### 9.13.2.5 LengthMapIdType

```
template<typename Network = DNetwork<>, typename DistType = double, typename NbHopsType =
std::size_t>
using LinkPred::DESPLDistCalculator< Network, DistType, NbHopsType >::LengthMapIdType = typename
NetDistCalculator<Network, DistType, NbHopsType>::LengthMapIdType
```

Length map ID type.

### 9.13.2.6 NetworkSP

```
template<typename Network = DNetwork<>, typename DistType = double, typename NbHopsType =
std::size_t>
using LinkPred::DESPLDistCalculator< Network, DistType, NbHopsType >::NetworkSP = typename
NetDistCalculator<Network, DistType, NbHopsType>::NetworkSP
```

Shared pointer to network.

### 9.13.2.7 NodeDistMap

```
template<typename Network = DNetwork<>, typename DistType = double, typename NbHopsType =
std::size_t>
using LinkPred::DESPLDistCalculator< Network, DistType, NbHopsType >::NodeDistMap = typename
NetDistCalculator<Network, DistType, NbHopsType>::NodeDistMap
```

Distance map.

### 9.13.2.8 NodeDistMapSP

```
template<typename Network = DNetwork<>, typename DistType = double, typename NbHopsType =
std::size_t>
using LinkPred::DESPLDistCalculator< Network, DistType, NbHopsType >::NodeDistMapSP = typename
NetDistCalculator<Network, DistType, NbHopsType>::NodeDistMapSP
```

Shared pointer to a distance map.

### 9.13.2.9 NodeID

```
template<typename Network = DNetwork<>, typename DistType = double, typename NbHopsType =
std::size_t>
using LinkPred::DESPLDistCalculator< Network, DistType, NbHopsType >::NodeID = typename NetDistCalculator<Net
DistType, NbHopsType>::NodeID
```

Nodes ID type.

### 9.13.2.10 NodeSDistMap

```
template<typename Network = DNetwork<>, typename DistType = double, typename NbHopsType =
std::size_t>
using LinkPred::DESPLDistCalculator< Network, DistType, NbHopsType >::NodeSDistMap = typename
Network::template NodeSMap<std::pair<DistType, NbHopsType> >
```

Distance map.

### 9.13.2.11 NodeSDistMapSP

```
template<typename Network = DNetwork<>, typename DistType = double, typename NbHopsType =
std::size_t>
using LinkPred::DESPLDistCalculator< Network, DistType, NbHopsType >::NodeSDistMapSP = typename
Network::template NodeSMapSP<std::pair<DistType, NbHopsType> >
```

Shared pointer to a distance map.

## 9.13.3 Constructor & Destructor Documentation

### 9.13.3.1 DESPLDistCalculator() [1/3]

```
template<typename Network = DNetwork<>, typename DistType = double, typename NbHopsType =
std::size_t>
LinkPred::DESPLDistCalculator< Network, DistType, NbHopsType >::DESPLDistCalculator (
    Dijkstra< Network, DistType, NbHopsType > & dijkstra,
    EdgeLengthMapSP length,
    std::size_t lim,
    CacheLevel cacheLevel = CacheLevel::NetworkCache ) [inline]
```

Constructor.

## Parameters

|                   |                                              |
|-------------------|----------------------------------------------|
| <i>dijkstra</i>   | A <a href="#">Dijkstra</a> algorithm object. |
| <i>lim</i>        | Horizon limit.                               |
| <i>length</i>     | The length map.                              |
| <i>cacheLevel</i> | The cache level.                             |

**9.13.3.2 DESPLDistCalculator()** [2/3]

```
template<typename Network = DNetwork<>, typename DistType = double, typename NbHopsType =
std::size_t>
LinkPred::DESPLDistCalculator< Network, DistType, NbHopsType >::DESPLDistCalculator (
    DESPLDistCalculator< Network, DistType, NbHopsType > const & that ) [default]
```

Copy constructor.

## Parameters

|             |                     |
|-------------|---------------------|
| <i>that</i> | The object to copy. |
|-------------|---------------------|

**9.13.3.3 DESPLDistCalculator()** [3/3]

```
template<typename Network = DNetwork<>, typename DistType = double, typename NbHopsType =
std::size_t>
LinkPred::DESPLDistCalculator< Network, DistType, NbHopsType >::DESPLDistCalculator (
    DESPLDistCalculator< Network, DistType, NbHopsType > && that ) [default]
```

Move constructor.

## Parameters

|             |                     |
|-------------|---------------------|
| <i>that</i> | The object to move. |
|-------------|---------------------|

**9.13.3.4 ~DESPLDistCalculator()**

```
template<typename Network = DNetwork<>, typename DistType = double, typename NbHopsType =
std::size_t>
virtual LinkPred::DESPLDistCalculator< Network, DistType, NbHopsType >::~~DESPLDistCalculator
( ) [inline], [virtual]
```

Destructor.



## 9.13.4 Member Function Documentation

### 9.13.4.1 getDist() [1/3]

```
template<typename Network = DNetwork<>, typename DistType = double, typename NbHopsType =
std::size_t>
virtual std::pair<DistType, NbHopsType> LinkPred::DESPLDistCalculator< Network, DistType,
NbHopsType >::getDist (
    Edge const & e ) [inline], [virtual]
```

#### Parameters

|          |                |
|----------|----------------|
| <i>e</i> | An input edge. |
|----------|----------------|

#### Returns

The distance between start and end of *e*.

### 9.13.4.2 getDist() [2/3]

```
template<typename Network = DNetwork<>, typename DistType = double, typename NbHopsType =
std::size_t>
virtual NodeDistMapSP LinkPred::DESPLDistCalculator< Network, DistType, NbHopsType >::getDist
(
    NodeID const & i ) [virtual]
```

#### Returns

The distance from *srcNode*.

#### Parameters

|          |                  |
|----------|------------------|
| <i>i</i> | The source node. |
|----------|------------------|

### 9.13.4.3 getDist() [3/3]

```
template<typename Network = DNetwork<>, typename DistType = double, typename NbHopsType =
std::size_t>
virtual std::pair<DistType, NbHopsType> LinkPred::DESPLDistCalculator< Network, DistType,
NbHopsType >::getDist (
    NodeID const & i,
    NodeID const & j ) [virtual]
```

**Parameters**

|          |                           |
|----------|---------------------------|
| <i>i</i> | Index of the source node. |
| <i>j</i> | Index of the end node.    |

**Returns**

The distance between *i* and *j*.

**9.13.4.4 getFinDistMapNoNeighb()**

```
template<typename Network = DNetwork<>, typename DistType = double, typename NbHopsType =
std::size_t>
virtual NodeSDistMapSP LinkPred::DESPLDistCalculator< Network, DistType, NbHopsType >::getFinDistMapNoNeighb (
    NodeID const & srcNode ) [virtual]
```

**Returns**

A sparse distance map of nodes having finite distance to a given source node. Only nodes not connected to *srcNode* are considered. The node *srcNode* itself is also excluded.

**Parameters**

|                |                  |
|----------------|------------------|
| <i>srcNode</i> | The source node. |
|----------------|------------------|

**9.13.4.5 getIndDist()**

```
template<typename Network = DNetwork<>, typename DistType = double, typename NbHopsType =
std::size_t>
virtual std::pair<DistType, NbHopsType> LinkPred::DESPLDistCalculator< Network, DistType,
NbHopsType >::getIndDist (
    NodeID const & i,
    NodeID const & j ) [inline], [virtual]
```

**Parameters**

|          |                           |
|----------|---------------------------|
| <i>i</i> | Index of the source node. |
| <i>j</i> | Index of the end node.    |

**Returns**

The distance between *i* and *j* ignoring the edge between *i* and *j*.

#### 9.13.4.6 getLim()

```
template<typename Network = DNetwork<>, typename DistType = double, typename NbHopsType =
std::size_t>
std::size_t LinkPred::DESPLDistCalculator< Network, DistType, NbHopsType >::getLim ( ) const
[inline]
```

##### Returns

The limit on the number of hops.

#### 9.13.4.7 getMaxNbNodesInCache()

```
template<typename Network = DNetwork<>, typename DistType = double, typename NbHopsType =
std::size_t>
std::size_t LinkPred::DESPLDistCalculator< Network, DistType, NbHopsType >::getMaxNbNodesInCache ( ) const [inline]
```

##### Returns

The maximum number of nodes allowed in cache.

#### 9.13.4.8 getSDistMap()

```
template<typename Network = DNetwork<>, typename DistType = double, typename NbHopsType =
std::size_t>
virtual NodeSDistMapSP LinkPred::DESPLDistCalculator< Network, DistType, NbHopsType >::getSDistMap (
    NodeID const & i ) [virtual]
```

##### Returns

The sparse distance from srcNode.

##### Parameters

|          |                  |
|----------|------------------|
| <i>i</i> | The source node. |
|----------|------------------|

#### 9.13.4.9 operator=() [1/2]

```
template<typename Network = DNetwork<>, typename DistType = double, typename NbHopsType =
std::size_t>
```

```
DESPLDistCalculator& LinkPred::DESPLDistCalculator< Network, DistType, NbHopsType >::operator=
(
    DESPLDistCalculator< Network, DistType, NbHopsType > && that ) [default]
```

Move assignment operator.

#### Parameters

|             |                     |
|-------------|---------------------|
| <i>that</i> | The object to move. |
|-------------|---------------------|

#### 9.13.4.10 operator=() [2/2]

```
template<typename Network = DNetwork<>, typename DistType = double, typename NbHopsType =
std::size_t>
DESPLDistCalculator& LinkPred::DESPLDistCalculator< Network, DistType, NbHopsType >::operator=
(
    DESPLDistCalculator< Network, DistType, NbHopsType > const & that ) [default]
```

Copy assignment operator.

#### Parameters

|             |                     |
|-------------|---------------------|
| <i>that</i> | The object to copy. |
|-------------|---------------------|

#### 9.13.4.11 setMaxNbNodesInCache()

```
template<typename Network = DNetwork<>, typename DistType = double, typename NbHopsType =
std::size_t>
void LinkPred::DESPLDistCalculator< Network, DistType, NbHopsType >::setMaxNbNodesInCache (
    std::size_t maxNbNodesInCache ) [inline]
```

Set the maximum number of nodes in cache (for each node a map of distance to all other nodes is kept in memory).

#### Parameters

|                          |                                                     |
|--------------------------|-----------------------------------------------------|
| <i>maxNbNodesInCache</i> | New value for the maximum number of nodes in cache. |
|--------------------------|-----------------------------------------------------|

The documentation for this class was generated from the following file:

- include/linkpred/graphalg/shortestpaths/[netdistcalculator.hpp](#)

## 9.14 LinkPred::DFS< Network, NodeProcessor > Class Template Reference

[DFS](#) graph traversal.

```
#include <graphtraversal.hpp>
```

Inheritance diagram for LinkPred::DFS< Network, NodeProcessor >:

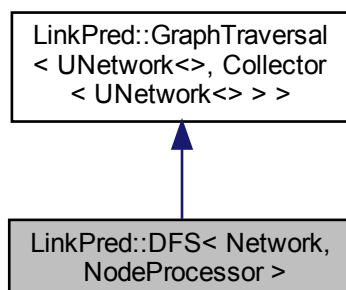

Collaboration diagram for LinkPred::DFS< Network, NodeProcessor >:

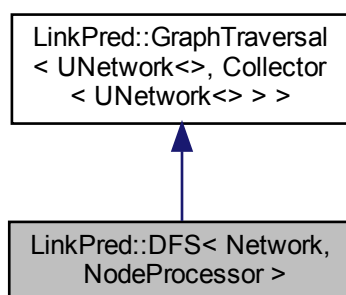

## Public Member Functions

- [DFS](#) (std::shared\_ptr< Network const > net)
- [DFS](#) ([DFS](#) const &that)=default
- [DFS](#) & [operator=](#) ([DFS](#) const &that)=default
- [DFS](#) ([DFS](#) &&that)=default
- [DFS](#) & [operator=](#) ([DFS](#) &&that)=default
- virtual void [traverse](#) (typename Network::NodeID srcNode, NodeProcessor &processor)
- virtual [~DFS](#) ()=default

### 9.14.1 Detailed Description

```
template<typename Network = UNetwork<>, typename NodeProcessor = Collector< Network>>
class LinkPred::DFS< Network, NodeProcessor >
```

[DFS](#) graph traversal.

## Template Parameters

|                      |                          |
|----------------------|--------------------------|
| <i>Network</i>       | The network type.        |
| <i>NodeProcessor</i> | The node processor type. |

## 9.14.2 Constructor & Destructor Documentation

### 9.14.2.1 DFS() [1/3]

```
template<typename Network = UNetwork<>, typename NodeProcessor = Collector< Network>>
LinkPred::DFS< Network, NodeProcessor >::DFS (
    std::shared_ptr< Network const > net ) [inline]
```

< The network on which traversal is done. Constructor.

## Parameters

|            |                                         |
|------------|-----------------------------------------|
| <i>net</i> | The network on which traversal is done. |
|------------|-----------------------------------------|

### 9.14.2.2 DFS() [2/3]

```
template<typename Network = UNetwork<>, typename NodeProcessor = Collector< Network>>
LinkPred::DFS< Network, NodeProcessor >::DFS (
    DFS< Network, NodeProcessor > const & that ) [default]
```

Copy constructor.

## Parameters

|             |                     |
|-------------|---------------------|
| <i>that</i> | The object to copy. |
|-------------|---------------------|

### 9.14.2.3 DFS() [3/3]

```
template<typename Network = UNetwork<>, typename NodeProcessor = Collector< Network>>
LinkPred::DFS< Network, NodeProcessor >::DFS (
    DFS< Network, NodeProcessor > && that ) [default]
```

Move constructor.

## Parameters

|             |                     |
|-------------|---------------------|
| <i>that</i> | The object to move. |
|-------------|---------------------|

#### 9.14.2.4 ~DFS()

```
template<typename Network = UNetwork<>, typename NodeProcessor = Collector< Network>>>
virtual LinkPred::DFS< Network, NodeProcessor >::~~DFS ( ) [virtual], [default]
```

Destructor.

### 9.14.3 Member Function Documentation

#### 9.14.3.1 operator=() [1/2]

```
template<typename Network = UNetwork<>, typename NodeProcessor = Collector< Network>>>
DFS& LinkPred::DFS< Network, NodeProcessor >::operator= (
    DFS< Network, NodeProcessor > && that ) [default]
```

Move assignment operator.

## Parameters

|             |                     |
|-------------|---------------------|
| <i>that</i> | The object to move. |
|-------------|---------------------|

#### 9.14.3.2 operator=() [2/2]

```
template<typename Network = UNetwork<>, typename NodeProcessor = Collector< Network>>>
DFS& LinkPred::DFS< Network, NodeProcessor >::operator= (
    DFS< Network, NodeProcessor > const & that ) [default]
```

Copy assignment operator.

## Parameters

|             |                     |
|-------------|---------------------|
| <i>that</i> | The object to copy. |
|-------------|---------------------|

### 9.14.3.3 traverse()

```
template<typename Network = UNetwork<>, typename NodeProcessor = Collector< Network>>
virtual void LinkPred::DFS< Network, NodeProcessor >::traverse (
    typename Network::NodeID srcNode,
    NodeProcessor & processor ) [inline], [virtual]
```

Traverse the graph in [DFS](#) order.

#### Parameters

|                  |                     |
|------------------|---------------------|
| <i>srcNode</i>   | The source node.    |
| <i>processor</i> | The node processor. |

The documentation for this class was generated from the following file:

- [include/linkpred/graphalg/traversal/graphtraversal.hpp](#)

## 9.15 LinkPred::DHDIPredictor< Network, EdgeRndIt, ScoreRndIt, EdgeRndOutIt > Class Template Reference

Common neighbor link predictor adapted to directed networks.

```
#include <dhdipredictor.hpp>
```

Inheritance diagram for LinkPred::DHDIPredictor< Network, EdgeRndIt, ScoreRndIt, EdgeRndOutIt >:

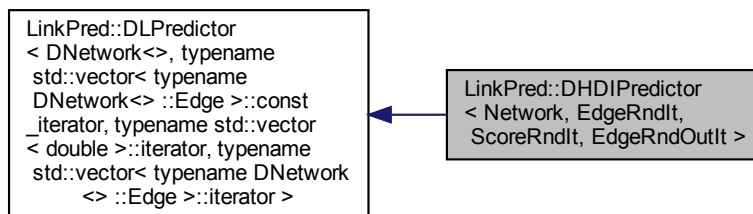

Collaboration diagram for LinkPred::DHDIPredictor< Network, EdgeRndIt, ScoreRndIt, EdgeRndOutIt >:

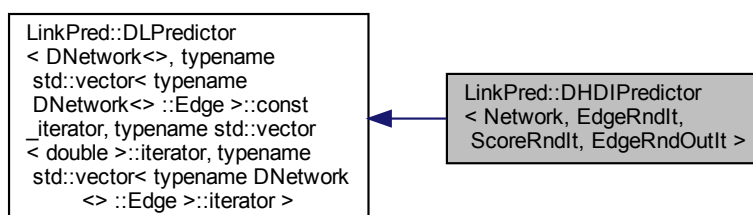



## Public Member Functions

- [DHDIPredictor](#) (std::shared\_ptr< [Network](#) const > net)
- [DHDIPredictor](#) ([DHDIPredictor](#) const &that)=default
- [DHDIPredictor](#) & [operator=](#) ([DHDIPredictor](#) const &that)=default
- [DHDIPredictor](#) ([DHDIPredictor](#) &&that)=default
- [DHDIPredictor](#) & [operator=](#) ([DHDIPredictor](#) &&that)=default
- virtual void [init](#) ()
- virtual void [learn](#) ()
- virtual void [predict](#) ([EdgeRndIt](#) begin, [EdgeRndIt](#) end, [ScoreRndIt](#) scores)
- virtual double [score](#) ([Edge](#) const &e)
- virtual std::size\_t [top](#) (std::size\_t k, [EdgeRndOutIt](#) eit, [ScoreRndIt](#) sit)
- virtual [~DHDIPredictor](#) ()=default

## Additional Inherited Members

### 9.15.1 Detailed Description

```
template<typename Network = DNetwork<>, typename EdgeRndIt = typename std::vector<typename Network::Edge>::const_iterator,
typename ScoreRndIt = typename std::vector<double>::iterator, typename EdgeRndOutIt = typename std::vector<typename Network::Edge>::iterator>
class LinkPred::DHDIPredictor< Network, EdgeRndIt, ScoreRndIt, EdgeRndOutIt >
```

Common neighbor link predictor adapted to directed networks.

#### Template Parameters

|                                           |                                                   |
|-------------------------------------------|---------------------------------------------------|
| <i>Network</i>                            | The network type.                                 |
| <i>Edge</i> <sub>↔</sub><br><i>RndIt</i>  | A random iterator type used to iterate on edges.  |
| <i>Score</i> <sub>↔</sub><br><i>RndIt</i> | A random iterator type used to iterate on scores. |

### 9.15.2 Constructor & Destructor Documentation

#### 9.15.2.1 DHDIPredictor() [1/3]

```
template<typename Network = DNetwork<>, typename EdgeRndIt = typename std::vector<typename
Network::Edge>::const_iterator, typename ScoreRndIt = typename std::vector<double>::iterator,
typename EdgeRndOutIt = typename std::vector<typename Network::Edge>::iterator>
LinkPred::DHDIPredictor< Network, EdgeRndIt, ScoreRndIt, EdgeRndOutIt >::DHDIPredictor (
    std::shared_ptr< Network const > net ) [inline]
```

#### Parameters

|            |              |
|------------|--------------|
| <i>net</i> | The network. |
|------------|--------------|

### 9.15.2.2 DHDIPredictor() [2/3]

```
template<typename Network = DNetwork<>, typename EdgeRndIt = typename std::vector<typename
Network::Edge>::const_iterator, typename ScoreRndIt = typename std::vector<double>::iterator,
typename EdgeRndOutIt = typename std::vector<typename Network::Edge>::iterator>
LinkPred::DHDIPredictor< Network, EdgeRndIt, ScoreRndIt, EdgeRndOutIt >::DHDIPredictor (
    DHDIPredictor< Network, EdgeRndIt, ScoreRndIt, EdgeRndOutIt > const & that )
[default]
```

Copy constructor.

#### Parameters

|             |                     |
|-------------|---------------------|
| <i>that</i> | The object to copy. |
|-------------|---------------------|

### 9.15.2.3 DHDIPredictor() [3/3]

```
template<typename Network = DNetwork<>, typename EdgeRndIt = typename std::vector<typename
Network::Edge>::const_iterator, typename ScoreRndIt = typename std::vector<double>::iterator,
typename EdgeRndOutIt = typename std::vector<typename Network::Edge>::iterator>
LinkPred::DHDIPredictor< Network, EdgeRndIt, ScoreRndIt, EdgeRndOutIt >::DHDIPredictor (
    DHDIPredictor< Network, EdgeRndIt, ScoreRndIt, EdgeRndOutIt > && that ) [default]
```

Move constructor.

#### Parameters

|             |                     |
|-------------|---------------------|
| <i>that</i> | The object to move. |
|-------------|---------------------|

### 9.15.2.4 ~DHDIPredictor()

```
template<typename Network = DNetwork<>, typename EdgeRndIt = typename std::vector<typename
Network::Edge>::const_iterator, typename ScoreRndIt = typename std::vector<double>::iterator,
typename EdgeRndOutIt = typename std::vector<typename Network::Edge>::iterator>
virtual LinkPred::DHDIPredictor< Network, EdgeRndIt, ScoreRndIt, EdgeRndOutIt >::~~DHDIPredictor
( ) [virtual], [default]
```

Destructor.

## 9.15.3 Member Function Documentation

### 9.15.3.1 init()

```
template<typename Network = DNetwork<>, typename EdgeRndIt = typename std::vector<typename
Network::Edge>::const_iterator, typename ScoreRndIt = typename std::vector<double>::iterator,
typename EdgeRndOutIt = typename std::vector<typename Network::Edge>::iterator>
virtual void LinkPred::DHDIPredictor< Network, EdgeRndIt, ScoreRndIt, EdgeRndOutIt >::init ( )
[inline], [virtual]
```

Initialize the solver.

Implements [LinkPred::DLPredictor< DNetwork<>, typename std::vector< typename DNetwork<> ::Edge >::const\\_iterator, typen](#)

### 9.15.3.2 learn()

```
template<typename Network = DNetwork<>, typename EdgeRndIt = typename std::vector<typename
Network::Edge>::const_iterator, typename ScoreRndIt = typename std::vector<double>::iterator,
typename EdgeRndOutIt = typename std::vector<typename Network::Edge>::iterator>
virtual void LinkPred::DHDIPredictor< Network, EdgeRndIt, ScoreRndIt, EdgeRndOutIt >::learn (
) [inline], [virtual]
```

Learn.

Implements [LinkPred::DLPredictor< DNetwork<>, typename std::vector< typename DNetwork<> ::Edge >::const\\_iterator, typen](#)

### 9.15.3.3 operator=() [1/2]

```
template<typename Network = DNetwork<>, typename EdgeRndIt = typename std::vector<typename
Network::Edge>::const_iterator, typename ScoreRndIt = typename std::vector<double>::iterator,
typename EdgeRndOutIt = typename std::vector<typename Network::Edge>::iterator>
DHDIPredictor& LinkPred::DHDIPredictor< Network, EdgeRndIt, ScoreRndIt, EdgeRndOutIt >::operator=
(
    DHDIPredictor< Network, EdgeRndIt, ScoreRndIt, EdgeRndOutIt > && that ) [default]
```

Move assignment operator.

#### Parameters

|             |                     |
|-------------|---------------------|
| <i>that</i> | The object to move. |
|-------------|---------------------|

### 9.15.3.4 operator=() [2/2]

```
template<typename Network = DNetwork<>, typename EdgeRndIt = typename std::vector<typename
Network::Edge>::const_iterator, typename ScoreRndIt = typename std::vector<double>::iterator,
typename EdgeRndOutIt = typename std::vector<typename Network::Edge>::iterator>
```

```
DHDI Predictor& LinkPred::DHDI Predictor< Network, EdgeRndIt, ScoreRndIt, EdgeRndOutIt >::operator=
(
    DHDI Predictor< Network, EdgeRndIt, ScoreRndIt, EdgeRndOutIt > const & that )
[default]
```

Copy assignment operator.

#### Parameters

|             |                     |
|-------------|---------------------|
| <i>that</i> | The object to copy. |
|-------------|---------------------|

### 9.15.3.5 predict()

```
template<typename Network = DNetwork<>, typename EdgeRndIt = typename std::vector<typename
Network::Edge>::const_iterator, typename ScoreRndIt = typename std::vector<double>::iterator,
typename EdgeRndOutIt = typename std::vector<typename Network::Edge>::iterator>
virtual void LinkPred::DHDI Predictor< Network, EdgeRndIt, ScoreRndIt, EdgeRndOutIt >::predict
(
    EdgeRndIt begin,
    EdgeRndIt end,
    ScoreRndIt scores ) [virtual]
```

Predict the links.

#### Parameters

|               |                                         |
|---------------|-----------------------------------------|
| <i>begin</i>  | Beginning of the links to be predicted. |
| <i>end</i>    | end of the links to be predicted.       |
| <i>scores</i> | Beginning of scores.                    |

Reimplemented from [LinkPred::DLPredictor< DNetwork<>, typename std::vector< typename DNetwork<> ::Edge >::const\\_iterator](#)

### 9.15.3.6 score()

```
template<typename Network = DNetwork<>, typename EdgeRndIt = typename std::vector<typename
Network::Edge>::const_iterator, typename ScoreRndIt = typename std::vector<double>::iterator,
typename EdgeRndOutIt = typename std::vector<typename Network::Edge>::iterator>
virtual double LinkPred::DHDI Predictor< Network, EdgeRndIt, ScoreRndIt, EdgeRndOutIt >::score
(
    Edge const & e ) [virtual]
```

Compute the score of a single edge.

#### Parameters

|          |           |
|----------|-----------|
| <i>e</i> | The edge. |
|----------|-----------|

**Returns**

The score of e.

**9.15.3.7 top()**

```
template<typename Network = DNetwork<>, typename EdgeRndIt = typename std::vector<typename
Network::Edge>::const_iterator, typename ScoreRndIt = typename std::vector<double>::iterator,
typename EdgeRndOutIt = typename std::vector<typename Network::Edge>::iterator>
virtual std::size_t LinkPred::DHPIPredictor< Network, EdgeRndIt, ScoreRndIt, EdgeRndOutIt >↵
::top (
    std::size_t k,
    EdgeRndOutIt eit,
    ScoreRndIt sit ) [virtual]
```

Finds the k negative edges with the top score. Ties are broken randomly.

**Parameters**

|            |                                                                                                         |
|------------|---------------------------------------------------------------------------------------------------------|
| <i>k</i>   | The number of edges to find.                                                                            |
| <i>eit</i> | An output iterator where the edges are written.                                                         |
| <i>sit</i> | An output iterator where the scores are written. The scores are written in the same order as the edges. |

**Returns**

The number of negative edges inserted. It is the minimum between k and the number of negative edges in the network.

Reimplemented from [LinkPred::DLPredictor< DNetwork<>, typename std::vector< typename DNetwork<> ::Edge >::const\\_iterator](#)

The documentation for this class was generated from the following file:

- [include/linkpred/predictors/directed/dhdipredictor.hpp](#)

## 9.16 LinkPred::DHPIPredictor< Network, EdgeRndIt, ScoreRndIt, EdgeRndOutIt > Class Template Reference

Common neighbor link predictor adapted to directed networks.

```
#include <dhpipredictor.hpp>
```

Inheritance diagram for LinkPred::DHPIPredictor< Network, EdgeRndIt, ScoreRndIt, EdgeRndOutIt >:

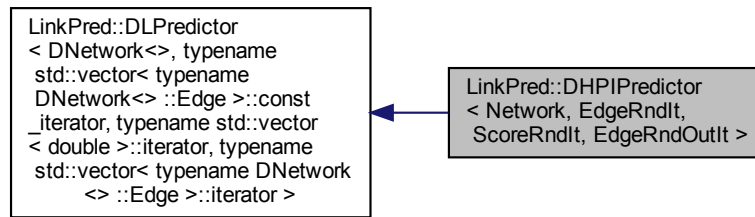

Collaboration diagram for LinkPred::DHPIPredictor< Network, EdgeRndIt, ScoreRndIt, EdgeRndOutIt >:

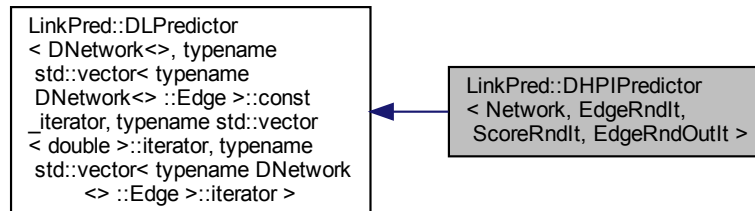

## Public Member Functions

- [DHPIPredictor](#) (std::shared\_ptr< [Network](#) const > net)
- [DHPIPredictor](#) ([DHPIPredictor](#) const &that)=default
- [DHPIPredictor](#) & operator= ([DHPIPredictor](#) const &that)=default
- [DHPIPredictor](#) ([DHPIPredictor](#) &&that)=default
- [DHPIPredictor](#) & operator= ([DHPIPredictor](#) &&that)=default
- virtual void [init](#) ()
- virtual void [learn](#) ()
- virtual void [predict](#) ([EdgeRndIt](#) begin, [EdgeRndIt](#) end, [ScoreRndIt](#) scores)
- virtual double [score](#) ([Edge](#) const &e)
- virtual std::size\_t [top](#) (std::size\_t k, [EdgeRndOutIt](#) eit, [ScoreRndIt](#) sit)
- virtual [~DHPIPredictor](#) ()=default

## Additional Inherited Members

### 9.16.1 Detailed Description

```

template<typename Network = DNetwork<>, typename EdgeRndIt = typename std::vector<typename Network::Edge>::const_iterator,
        typename ScoreRndIt = typename std::vector<double>::iterator, typename EdgeRndOutIt = typename std::vector<typename Network::Edge>::iterator>
class LinkPred::DHPIPredictor< Network, EdgeRndIt, ScoreRndIt, EdgeRndOutIt >
  
```

Common neighbor link predictor adapted to directed networks.

## Template Parameters

|                         |                                                   |
|-------------------------|---------------------------------------------------|
| <i>Network</i>          | The network type.                                 |
| <i>Edge↔<br/>RndIt</i>  | A random iterator type used to iterate on edges.  |
| <i>Score↔<br/>RndIt</i> | A random iterator type used to iterate on scores. |

## 9.16.2 Constructor &amp; Destructor Documentation

## 9.16.2.1 DHPIPredictor() [1/3]

```
template<typename Network = DNetwork<>, typename EdgeRndIt = typename std::vector<typename
Network::Edge>::const_iterator, typename ScoreRndIt = typename std::vector<double>::iterator,
typename EdgeRndOutIt = typename std::vector<typename Network::Edge>::iterator>
LinkPred::DHPIPredictor< Network, EdgeRndIt, ScoreRndIt, EdgeRndOutIt >::DHPIPredictor (
    std::shared_ptr< Network const > net ) [inline]
```

## Parameters

|            |              |
|------------|--------------|
| <i>net</i> | The network. |
|------------|--------------|

## 9.16.2.2 DHPIPredictor() [2/3]

```
template<typename Network = DNetwork<>, typename EdgeRndIt = typename std::vector<typename
Network::Edge>::const_iterator, typename ScoreRndIt = typename std::vector<double>::iterator,
typename EdgeRndOutIt = typename std::vector<typename Network::Edge>::iterator>
LinkPred::DHPIPredictor< Network, EdgeRndIt, ScoreRndIt, EdgeRndOutIt >::DHPIPredictor (
    DHPIPredictor< Network, EdgeRndIt, ScoreRndIt, EdgeRndOutIt > const & that )
[default]
```

Copy constructor.

## Parameters

|             |                     |
|-------------|---------------------|
| <i>that</i> | The object to copy. |
|-------------|---------------------|

## 9.16.2.3 DHPIPredictor() [3/3]

```
template<typename Network = DNetwork<>, typename EdgeRndIt = typename std::vector<typename
Network::Edge>::const_iterator, typename ScoreRndIt = typename std::vector<double>::iterator,
```

```

typename EdgeRndOutIt = typename std::vector<typename Network::Edge>::iterator>
LinkPred::DHPIPredictor< Network, EdgeRndIt, ScoreRndIt, EdgeRndOutIt >::DHPIPredictor (
    DHPIPredictor< Network, EdgeRndIt, ScoreRndIt, EdgeRndOutIt > && that ) [default]

```

Move constructor.

#### Parameters

|             |                     |
|-------------|---------------------|
| <i>that</i> | The object to move. |
|-------------|---------------------|

### 9.16.2.4 ~DHPIPredictor()

```

template<typename Network = DNetwork<>, typename EdgeRndIt = typename std::vector<typename
Network::Edge>::const_iterator, typename ScoreRndIt = typename std::vector<double>::iterator,
typename EdgeRndOutIt = typename std::vector<typename Network::Edge>::iterator>
virtual LinkPred::DHPIPredictor< Network, EdgeRndIt, ScoreRndIt, EdgeRndOutIt >::~~DHPIPredictor
( ) [virtual], [default]

```

Destructor.

## 9.16.3 Member Function Documentation

### 9.16.3.1 init()

```

template<typename Network = DNetwork<>, typename EdgeRndIt = typename std::vector<typename
Network::Edge>::const_iterator, typename ScoreRndIt = typename std::vector<double>::iterator,
typename EdgeRndOutIt = typename std::vector<typename Network::Edge>::iterator>
virtual void LinkPred::DHPIPredictor< Network, EdgeRndIt, ScoreRndIt, EdgeRndOutIt >::init ( )
[inline], [virtual]

```

Initialize the solver.

Implements [LinkPred::DLPredictor< DNetwork<>, typename std::vector< typename DNetwork<> ::Edge >::const\\_iterator, typena](#)

### 9.16.3.2 learn()

```

template<typename Network = DNetwork<>, typename EdgeRndIt = typename std::vector<typename
Network::Edge>::const_iterator, typename ScoreRndIt = typename std::vector<double>::iterator,
typename EdgeRndOutIt = typename std::vector<typename Network::Edge>::iterator>
virtual void LinkPred::DHPIPredictor< Network, EdgeRndIt, ScoreRndIt, EdgeRndOutIt >::learn (
) [inline], [virtual]

```

Learn.

Implements [LinkPred::DLPredictor< DNetwork<>, typename std::vector< typename DNetwork<> ::Edge >::const\\_iterator, typena](#)



### 9.16.3.3 operator=() [1/2]

```
template<typename Network = DNetwork<>, typename EdgeRndIt = typename std::vector<typename
Network::Edge>::const_iterator, typename ScoreRndIt = typename std::vector<double>::iterator,
typename EdgeRndOutIt = typename std::vector<typename Network::Edge>::iterator>
DHPIPredictor& LinkPred::DHPIPredictor< Network, EdgeRndIt, ScoreRndIt, EdgeRndOutIt >::operator=
(
    DHPIPredictor< Network, EdgeRndIt, ScoreRndIt, EdgeRndOutIt > && that ) [default]
```

Move assignment operator.

#### Parameters

|             |                     |
|-------------|---------------------|
| <i>that</i> | The object to move. |
|-------------|---------------------|

### 9.16.3.4 operator=() [2/2]

```
template<typename Network = DNetwork<>, typename EdgeRndIt = typename std::vector<typename
Network::Edge>::const_iterator, typename ScoreRndIt = typename std::vector<double>::iterator,
typename EdgeRndOutIt = typename std::vector<typename Network::Edge>::iterator>
DHPIPredictor& LinkPred::DHPIPredictor< Network, EdgeRndIt, ScoreRndIt, EdgeRndOutIt >::operator=
(
    DHPIPredictor< Network, EdgeRndIt, ScoreRndIt, EdgeRndOutIt > const & that )
[default]
```

Copy assignment operator.

#### Parameters

|             |                     |
|-------------|---------------------|
| <i>that</i> | The object to copy. |
|-------------|---------------------|

### 9.16.3.5 predict()

```
template<typename Network = DNetwork<>, typename EdgeRndIt = typename std::vector<typename
Network::Edge>::const_iterator, typename ScoreRndIt = typename std::vector<double>::iterator,
typename EdgeRndOutIt = typename std::vector<typename Network::Edge>::iterator>
virtual void LinkPred::DHPIPredictor< Network, EdgeRndIt, ScoreRndIt, EdgeRndOutIt >::predict
(
    EdgeRndIt begin,
    EdgeRndIt end,
    ScoreRndIt scores ) [virtual]
```

Predict the links.

#### Parameters

|               |                                         |
|---------------|-----------------------------------------|
| <i>begin</i>  | Beginning of the links to be predicted. |
| <i>end</i>    | end of the links to be predicted.       |
| <i>scores</i> | Beginning of scores.                    |

Reimplemented from [LinkPred::DLPredictor< DNetwork<>, typename std::vector< typename DNetwork<> ::Edge >::const\\_iterator](#)

### 9.16.3.6 score()

```
template<typename Network = DNetwork<>, typename EdgeRndIt = typename std::vector<typename
Network::Edge>::const_iterator, typename ScoreRndIt = typename std::vector<double>::iterator,
typename EdgeRndOutIt = typename std::vector<typename Network::Edge>::iterator>
virtual double LinkPred::DHPIPredictor< Network, EdgeRndIt, ScoreRndIt, EdgeRndOutIt >::score
(
    Edge const & e ) [virtual]
```

Compute the score of a single edge.

#### Parameters

|          |           |
|----------|-----------|
| <i>e</i> | The edge. |
|----------|-----------|

#### Returns

The score of *e*.

### 9.16.3.7 top()

```
template<typename Network = DNetwork<>, typename EdgeRndIt = typename std::vector<typename
Network::Edge>::const_iterator, typename ScoreRndIt = typename std::vector<double>::iterator,
typename EdgeRndOutIt = typename std::vector<typename Network::Edge>::iterator>
virtual std::size_t LinkPred::DHPIPredictor< Network, EdgeRndIt, ScoreRndIt, EdgeRndOutIt >↔
::top (
    std::size_t k,
    EdgeRndOutIt eit,
    ScoreRndIt sit ) [virtual]
```

Finds the *k* negative edges with the top score. Ties are broken randomly.

#### Parameters

|            |                                                                                                         |
|------------|---------------------------------------------------------------------------------------------------------|
| <i>k</i>   | The number of edges to find.                                                                            |
| <i>eit</i> | An output iterator where the edges are written.                                                         |
| <i>sit</i> | An output iterator where the scores are written. The scores are written in the same order as the edges. |

#### Returns

The number of negative edges inserted. It is the minimum between *k* and the number of negative edges in the network.

Reimplemented from [LinkPred::DLPredictor< DNetwork<>, typename std::vector< typename DNetwork<> ::Edge >::const\\_iterator](#)

The documentation for this class was generated from the following file:

- [include/linkpred/predictors/directed/dhpidpredictor.hpp](#)

## 9.17 LinkPred::Dijkstra< Network, DistType, NbHopsType > Class Template Reference

An implementation of [Dijkstra](#)'s algorithm.

```
#include <dijkstra.hpp>
```

### Public Types

- using [LengthMapIdType](#) = long int
- using [NetworkSP](#) = std::shared\_ptr< Network >
- using [NodeId](#) = typename Network::NodeId
- using [Label](#) = typename Network::Label
- using [Edge](#) = typename Network::Edge
- using [NodeDistMap](#) = typename Network::template NodeMap< std::pair< DistType, NbHopsType > >
- using [NodeDistMapSP](#) = typename Network::template NodeMapSP< std::pair< DistType, NbHopsType > >
- using [NodeSDistMapSP](#) = typename Network::template NodeSMapSP< std::pair< DistType, NbHopsType > >
- using [EdgeLengthMap](#) = typename Network::template EdgeMap< DistType >
- using [EdgeLengthMapSP](#) = typename Network::template EdgeMapSP< DistType >
- using [PathType](#) = std::vector< [NodeId](#) >
- using [PathTypeSP](#) = std::shared\_ptr< [PathType](#) >

### Public Member Functions

- [Dijkstra](#) (std::shared\_ptr< Network const > net)
- [Dijkstra](#) ()=default
- [Dijkstra](#) ([Dijkstra](#) const &that)=default
- [Dijkstra](#) & operator= ([Dijkstra](#) const &that)=default
- [Dijkstra](#) ([Dijkstra](#) &&that)=default
- [Dijkstra](#) & operator= ([Dijkstra](#) &&that)=default
- std::shared\_ptr< Network const > [getNet](#) () const
- void [setNet](#) (std::shared\_ptr< const Network > net)
- [LengthMapIdType](#) [registerLengthMap](#) ([EdgeLengthMapSP](#) length)
- void [unregisterLengthMap](#) ([LengthMapIdType](#) const &lengthMapId)
- std::pair< DistType, NbHopsType > [getIndDist](#) ([NodeId](#) const &srcId, [NodeId](#) const &dstId, [LengthMapIdType](#) lengthMapId, DistType discDist=std::numeric\_limits< DistType >::infinity(), NbHopsType discNbHops=std::numeric\_limits< NbHopsType >::max()) const
- [NodeDistMapSP](#) [getIndDistToAll](#) ([NodeId](#) const &srcId, [NodeId](#) const &dstId, [LengthMapIdType](#) lengthMapId, DistType discDist=std::numeric\_limits< DistType >::infinity(), NbHopsType discNbHops=std::numeric\_limits< NbHopsType >::max()) const
- std::pair< [PathTypeSP](#), double > [getShortestPath](#) ([NodeId](#) const &srcId, [NodeId](#) const &dstId, [LengthMapIdType](#) lengthMapId, DistType discDist=std::numeric\_limits< DistType >::infinity(), NbHopsType discNbHops=std::numeric\_limits< NbHopsType >::max()) const
- [NodeDistMapSP](#) [getDist](#) ([NodeId](#) const &srcId, [LengthMapIdType](#) lengthMapId, DistType discDist=std::numeric\_limits< DistType >::infinity(), NbHopsType discNbHops=std::numeric\_limits< NbHopsType >::max()) const

- [NodeSDistMapSP](#) [getDistL](#) ([NodeID](#) const &srcId, [LengthMapIdType](#) lengthMapId, std::size\_t lim, DistType discDist=std::numeric\_limits< DistType >::infinity(), NbHopsType discNbHops=std::numeric\_limits< NbHopsType >::max()) const
- template<typename InputIterator , typename OutputIterator >  
void [getDist](#) (InputIterator begin, InputIterator end, OutputIterator outIt, [LengthMapIdType](#) lengthMapId, DistType discDist=std::numeric\_limits< DistType >::infinity(), NbHopsType discNbHops=std::numeric\_limits< NbHopsType >::max()) const
- template<typename InputIterator , typename OutputIterator >  
void [getSDist](#) (InputIterator begin, InputIterator end, OutputIterator outIt, [LengthMapIdType](#) lengthMapId, DistType discDist=std::numeric\_limits< DistType >::infinity(), NbHopsType discNbHops=std::numeric\_limits< NbHopsType >::max()) const
- [NodeDistMapSP](#) [getDsim](#) ([NodeID](#) const &srcId, [LengthMapIdType](#) lengthMapId, DistType discDist=std::numeric\_limits< DistType >::infinity(), NbHopsType discNbHops=std::numeric\_limits< NbHopsType >::max()) const
- std::pair< DistType, NbHopsType > [getIndDsim](#) ([NodeID](#) const &srcId, [NodeID](#) const &dstId, [LengthMapIdType](#) lengthMapId, DistType discDist=std::numeric\_limits< DistType >::infinity(), NbHopsType discNbHops=std::numeric\_limits< NbHopsType >::max()) const
- std::map< [NodeID](#), [NodeDistMapSP](#) > [getDsim](#) (std::set< [NodeID](#) > const &srcIds, [LengthMapIdType](#) lengthMapId, DistType discDist=std::numeric\_limits< DistType >::infinity(), NbHopsType discNbHops=std::numeric\_limits< NbHopsType >::max()) const
- virtual [~Dijkstra](#) ()=default

### 9.17.1 Detailed Description

```
template<typename Network = UNetwork<>, typename DistType = double, typename NbHopsType = std::size_t>
class LinkPred::Dijkstra< Network, DistType, NbHopsType >
```

An implementation of [Dijkstra](#)'s algorithm.

This class currently implements [Dijkstra](#)'s algorithm using a binary heap, which means that the algorithm runs in  $O(m + n (\log n)^2)$  instead of  $O(m + n \log n)$ .

#### Template Parameters

|                   |                                                               |
|-------------------|---------------------------------------------------------------|
| <i>Network</i>    | The network type.                                             |
| <i>DistType</i>   | The distance type (can be an integer or floating point type). |
| <i>NbHopsType</i> | The type of the number of hops (must be an integer type).     |

### 9.17.2 Member Typedef Documentation

#### 9.17.2.1 Edge

```
template<typename Network = UNetwork<>, typename DistType = double, typename NbHopsType =
std::size_t>
using LinkPred::Dijkstra< Network, DistType, NbHopsType >::Edge = typename Network::Edge
```

Edge type.

### 9.17.2.2 EdgeLengthMap

```
template<typename Network = UNetwork<>, typename DistType = double, typename NbHopsType =
std::size_t>
using LinkPred::Dijkstra< Network, DistType, NbHopsType >::EdgeLengthMap = typename Network↔
::template EdgeMap<DistType>
```

Edge length map.

### 9.17.2.3 EdgeLengthMapSP

```
template<typename Network = UNetwork<>, typename DistType = double, typename NbHopsType =
std::size_t>
using LinkPred::Dijkstra< Network, DistType, NbHopsType >::EdgeLengthMapSP = typename Network↔
::template EdgeMapSP<DistType>
```

Shared pointer to an edge length map.

### 9.17.2.4 Label

```
template<typename Network = UNetwork<>, typename DistType = double, typename NbHopsType =
std::size_t>
using LinkPred::Dijkstra< Network, DistType, NbHopsType >::Label = typename Network::Label
```

Nodes label type.

### 9.17.2.5 LengthMapIdType

```
template<typename Network = UNetwork<>, typename DistType = double, typename NbHopsType =
std::size_t>
using LinkPred::Dijkstra< Network, DistType, NbHopsType >::LengthMapIdType = long int
```

Length map ID type.

### 9.17.2.6 NetworkSP

```
template<typename Network = UNetwork<>, typename DistType = double, typename NbHopsType =
std::size_t>
using LinkPred::Dijkstra< Network, DistType, NbHopsType >::NetworkSP = std::shared_ptr<Network>
```

Shared pointer to network.

### 9.17.2.7 NodeDistMap

```
template<typename Network = UNetwork<>, typename DistType = double, typename NbHopsType =
std::size_t>
using LinkPred::Dijkstra< Network, DistType, NbHopsType >::NodeDistMap = typename Network↔
::template NodeMap<std::pair<DistType, NbHopsType> >
```

Distance map.

### 9.17.2.8 NodeDistMapSP

```
template<typename Network = UNetwork<>, typename DistType = double, typename NbHopsType =
std::size_t>
using LinkPred::Dijkstra< Network, DistType, NbHopsType >::NodeDistMapSP = typename Network↔
::template NodeMapSP<std::pair<DistType, NbHopsType> >
```

Shared pointer to a distance map.

### 9.17.2.9 NodeID

```
template<typename Network = UNetwork<>, typename DistType = double, typename NbHopsType =
std::size_t>
using LinkPred::Dijkstra< Network, DistType, NbHopsType >::NodeID = typename Network::NodeID
```

Nodes ID type.

### 9.17.2.10 NodeSDistMapSP

```
template<typename Network = UNetwork<>, typename DistType = double, typename NbHopsType =
std::size_t>
using LinkPred::Dijkstra< Network, DistType, NbHopsType >::NodeSDistMapSP = typename Network↔
::template NodeSMapSP<std::pair<DistType, NbHopsType> >
```

Shared pointer to a sparse distance map.

### 9.17.2.11 PathType

```
template<typename Network = UNetwork<>, typename DistType = double, typename NbHopsType =
std::size_t>
using LinkPred::Dijkstra< Network, DistType, NbHopsType >::PathType = std::vector<NodeID>
```

Path.

### 9.17.2.12 PathTypeSP

```
template<typename Network = UNetwork<>, typename DistType = double, typename NbHopsType =
std::size_t>
using LinkPred::Dijkstra< Network, DistType, NbHopsType >::PathTypeSP = std::shared_ptr<PathType>
```

Shared pointer to a path.

## 9.17.3 Constructor & Destructor Documentation

**9.17.3.1 Dijkstra()** [1/4]

```
template<typename Network = UNetwork<>, typename DistType = double, typename NbHopsType =
std::size_t>
LinkPred::Dijkstra< Network, DistType, NbHopsType >::Dijkstra (
    std::shared_ptr< Network const > net ) [inline]
```

Constructor.

**9.17.3.2 Dijkstra()** [2/4]

```
template<typename Network = UNetwork<>, typename DistType = double, typename NbHopsType =
std::size_t>
LinkPred::Dijkstra< Network, DistType, NbHopsType >::Dijkstra ( ) [default]
```

Default constructor.

**9.17.3.3 Dijkstra()** [3/4]

```
template<typename Network = UNetwork<>, typename DistType = double, typename NbHopsType =
std::size_t>
LinkPred::Dijkstra< Network, DistType, NbHopsType >::Dijkstra (
    Dijkstra< Network, DistType, NbHopsType > const & that ) [default]
```

Copy constructor.

**Parameters**

|             |                     |
|-------------|---------------------|
| <i>that</i> | The object to copy. |
|-------------|---------------------|

**9.17.3.4 Dijkstra()** [4/4]

```
template<typename Network = UNetwork<>, typename DistType = double, typename NbHopsType =
std::size_t>
LinkPred::Dijkstra< Network, DistType, NbHopsType >::Dijkstra (
    Dijkstra< Network, DistType, NbHopsType > && that ) [default]
```

Move constructor.

**Parameters**

|             |                     |
|-------------|---------------------|
| <i>that</i> | The object to move. |
|-------------|---------------------|

### 9.17.3.5 ~Dijkstra()

```
template<typename Network = UNetwork<>, typename DistType = double, typename NbHopsType =
std::size_t>
virtual LinkPred::Dijkstra< Network, DistType, NbHopsType >::~~Dijkstra ( ) [virtual], [default]
```

Destructor.

## 9.17.4 Member Function Documentation

### 9.17.4.1 getDist() [1/2]

```
template<typename Network = UNetwork<>, typename DistType = double, typename NbHopsType =
std::size_t>
template<typename InputIterator , typename OuputIterator >
void LinkPred::Dijkstra< Network, DistType, NbHopsType >::getDist (
    InputIterator begin,
    InputIterator end,
    OuputIterator outit,
    LengthMapIdType lengthMapId,
    DistType discDist = std::numeric_limits<DistType>::infinity(),
    NbHopsType discNbHops = std::numeric_limits<NbHopsType>::max() ) const [inline]
```

Computes the distance from a list of nodes to all other nodes.

#### Parameters

|                          |                                                                                 |
|--------------------------|---------------------------------------------------------------------------------|
| <i>begin</i>             | Iterator to the first element in the list of source nodes.                      |
| <i>end</i>               | Iterator to one past the last element in the list of source nodes.              |
| <i>outit</i>             | Output iterator.                                                                |
| <i>length↔<br/>MapId</i> | The ID of the map length (as returned by UNetwork::registerLengthMap).          |
| <i>discDist</i>          | The value that should be assigned as distance between disconnected nodes.       |
| <i>discNbHops</i>        | The value that should be assigned as number of hops between disconnected nodes. |

### 9.17.4.2 getDist() [2/2]

```
template<typename Network = UNetwork<>, typename DistType = double, typename NbHopsType =
std::size_t>
NodeDistMapSP LinkPred::Dijkstra< Network, DistType, NbHopsType >::getDist (
    NodeID const & srcId,
    LengthMapIdType lengthMapId,
    DistType discDist = std::numeric_limits< DistType >::infinity(),
    NbHopsType discNbHops = std::numeric_limits< NbHopsType >::max() ) const
```

Computes the distance from a single source node to all other nodes.



## Parameters

|                          |                                                                                 |
|--------------------------|---------------------------------------------------------------------------------|
| <i>srcId</i>             | The ID of the source node.                                                      |
| <i>length↔<br/>MapId</i> | The ID of the map length (as returned by UNetwork::registerLengthMap).          |
| <i>discDist</i>          | The value that should be assigned as distance between disconnected nodes.       |
| <i>discNbHops</i>        | The value that should be assigned as number of hops between disconnected nodes. |

## Returns

The distance map.

## 9.17.4.3 getDistL()

```
template<typename Network = UNetwork<>, typename DistType = double, typename NbHopsType =
std::size_t>
NodeSDistMapSP LinkPred::Dijkstra< Network, DistType, NbHopsType >::getDistL (
    NodeID const & srcId,
    LengthMapIdType lengthMapId,
    std::size_t lim,
    DistType discDist = std::numeric_limits< DistType >::infinity(),
    NbHopsType discNbHops = std::numeric_limits< NbHopsType >::max() ) const
```

Computes the distance with a limit on the number of hops from a single source node to all other nodes.

## Parameters

|                          |                                                                                 |
|--------------------------|---------------------------------------------------------------------------------|
| <i>srcId</i>             | The ID of the source node.                                                      |
| <i>length↔<br/>MapId</i> | The ID of the map length (as returned by UNetwork::registerLengthMap).          |
| <i>lim</i>               | The limit on the number of hops.                                                |
| <i>discDist</i>          | The value that should be assigned as distance between disconnected nodes.       |
| <i>discNbHops</i>        | The value that should be assigned as number of hops between disconnected nodes. |

## Returns

The distance map.

## 9.17.4.4 getDsim() [1/2]

```
template<typename Network = UNetwork<>, typename DistType = double, typename NbHopsType =
std::size_t>
NodeDistMapSP LinkPred::Dijkstra< Network, DistType, NbHopsType >::getDsim (
    NodeID const & srcId,
    LengthMapIdType lengthMapId,
```

```
DistType discDist = std::numeric_limits< DistType >::infinity(),  
NbHopsType discNbHops = std::numeric_limits< NbHopsType >::max() ) const
```

Computes the dissimilarity of a single source node to all other nodes.

## Parameters

|                          |                                                                                 |
|--------------------------|---------------------------------------------------------------------------------|
| <i>srcId</i>             | The ID of the source node.                                                      |
| <i>length↔<br/>MapId</i> | The ID of the map length (as returned by UNetwork::registerLengthMap).          |
| <i>discDist</i>          | The value that should be assigned as distance between disconnected nodes.       |
| <i>discNbHops</i>        | The value that should be assigned as number of hops between disconnected nodes. |

## Returns

The distance map.

## 9.17.4.5 getDsim() [2/2]

```
template<typename Network = UNetwork<>, typename DistType = double, typename NbHopsType =
std::size_t>
std::map<NodeID, NodeDistMapSP> LinkPred::Dijkstra< Network, DistType, NbHopsType >::getDsim
(
    std::set< NodeID > const & srcIds,
    LengthMapIdType lengthMapId,
    DistType discDist = std::numeric_limits< DistType >::infinity(),
    NbHopsType discNbHops = std::numeric_limits< NbHopsType >::max() ) const
```

Computes the dissimilarity of a set of nodes to all other nodes.

## Parameters

|                          |                                                                                 |
|--------------------------|---------------------------------------------------------------------------------|
| <i>srcIds</i>            | The IDs of the source node.                                                     |
| <i>length↔<br/>MapId</i> | The ID of the map length (as returned by UNetwork::registerLengthMap).          |
| <i>discDist</i>          | The value that should be assigned as distance between disconnected nodes.       |
| <i>discNbHops</i>        | The value that should be assigned as number of hops between disconnected nodes. |

## Returns

The distance map.

## 9.17.4.6 getIndDist()

```
template<typename Network = UNetwork<>, typename DistType = double, typename NbHopsType =
std::size_t>
std::pair<DistType, NbHopsType> LinkPred::Dijkstra< Network, DistType, NbHopsType >::getInd↔
Dist (
    NodeID const & srcId,
    NodeID const & dstId,
```

```

LengthMapIdType lengthMapId,
DistType discDist = std::numeric_limits< DistType >::infinity(),
NbHopsType discNbHops = std::numeric_limits< NbHopsType >::max() ) const

```

Computes the distance between two nodes while ignoring the edge between them.

#### Parameters

|                          |                                                                                 |
|--------------------------|---------------------------------------------------------------------------------|
| <i>srcId</i>             | The ID of the source node.                                                      |
| <i>dstId</i>             | The ID of the destination node.                                                 |
| <i>length↔<br/>MapId</i> | The ID of the map length (as returned by UNetwork::registerLengthMap).          |
| <i>discDist</i>          | The value that should be assigned as distance between disconnected nodes.       |
| <i>discNbHops</i>        | The value that should be assigned as number of hops between disconnected nodes. |

#### Returns

The distance map.

#### 9.17.4.7 getIndDistToAll()

```

template<typename Network = UNetwork<>, typename DistType = double, typename NbHopsType =
std::size_t>
NodeDistMapSP LinkPred::Dijkstra< Network, DistType, NbHopsType >::getIndDistToAll (
    NodeID const & srcId,
    NodeID const & dstId,
    LengthMapIdType lengthMapId,
    DistType discDist = std::numeric_limits< DistType >::infinity(),
    NbHopsType discNbHops = std::numeric_limits< NbHopsType >::max() ) const

```

Computes the distance from a single source node to all other nodes while ignoring the edge between the source node and a specific node.

#### Parameters

|                          |                                                                                 |
|--------------------------|---------------------------------------------------------------------------------|
| <i>srcId</i>             | The ID of the source node.                                                      |
| <i>dstId</i>             | The ID of the destination node of the edge to be ignored.                       |
| <i>length↔<br/>MapId</i> | The ID of the map length (as returned by UNetwork::registerLengthMap).          |
| <i>discDist</i>          | The value that should be assigned as distance between disconnected nodes.       |
| <i>discNbHops</i>        | The value that should be assigned as number of hops between disconnected nodes. |

#### Returns

The distance map.

#### 9.17.4.8 getIndDsim()

```
template<typename Network = UNetwork<>, typename DistType = double, typename NbHopsType =
std::size_t>
std::pair<DistType, NbHopsType> LinkPred::Dijkstra< Network, DistType, NbHopsType >::getIndDsim (
    NodeID const & srcId,
    NodeID const & dstId,
    LengthMapIdType lengthMapId,
    DistType discDist = std::numeric_limits< DistType >::infinity(),
    NbHopsType discNbHops = std::numeric_limits< NbHopsType >::max() ) const
```

Computes the dissimilarity between two nodes while ignoring the direction edge between them.

##### Parameters

|                    |                                                                                 |
|--------------------|---------------------------------------------------------------------------------|
| <i>srcId</i>       | The ID of the source node.                                                      |
| <i>dstId</i>       | The ID of the destination node.                                                 |
| <i>lengthMapId</i> | The ID of the map length (as returned by UNetwork::registerLengthMap).          |
| <i>discDist</i>    | The value that should be assigned as distance between disconnected nodes.       |
| <i>discNbHops</i>  | The value that should be assigned as number of hops between disconnected nodes. |

##### Returns

The distance map.

#### 9.17.4.9 getNet()

```
template<typename Network = UNetwork<>, typename DistType = double, typename NbHopsType =
std::size_t>
std::shared_ptr<Network const> LinkPred::Dijkstra< Network, DistType, NbHopsType >::getNet (
) const [inline]
```

##### Returns

The network.

#### 9.17.4.10 getSDist()

```
template<typename Network = UNetwork<>, typename DistType = double, typename NbHopsType =
std::size_t>
template<typename InputIterator , typename OutputIterator >
void LinkPred::Dijkstra< Network, DistType, NbHopsType >::getSDist (
    InputIterator begin,
    InputIterator end,
    OutputIterator outIt,
    LengthMapIdType lengthMapId,
    DistType discDist = std::numeric_limits<DistType>::infinity(),
    NbHopsType discNbHops = std::numeric_limits<NbHopsType>::max() ) const [inline]
```

Computes the inverse similarity from a list of nodes to all other nodes.

## Parameters

|                          |                                                                                 |
|--------------------------|---------------------------------------------------------------------------------|
| <i>begin</i>             | Iterator to the first element in the list of source nodes.                      |
| <i>end</i>               | Iterator to one past the last element in the list of source nodes.              |
| <i>outIt</i>             | Output iterator.                                                                |
| <i>length↔<br/>MapId</i> | The ID of the map length (as returned by UNetwork::registerLengthMap).          |
| <i>discDist</i>          | The value that should be assigned as distance between disconnected nodes.       |
| <i>discNbHops</i>        | The value that should be assigned as number of hops between disconnected nodes. |

## 9.17.4.11 getShortestPath()

```
template<typename Network = UNetwork<>, typename DistType = double, typename NbHopsType =
std::size_t>
std::pair<PathTypeSP, double> LinkPred::Dijkstra< Network, DistType, NbHopsType >::get↔
ShortestPath (
    NodeID const & srcId,
    NodeID const & dstId,
    LengthMapIdType lengthMapId,
    DistType discDist = std::numeric_limits< DistType >::infinity(),
    NbHopsType discNbHops = std::numeric_limits< NbHopsType >::max() ) const
```

Finds the shortest path from a node to another.

## Parameters

|                          |                                                                                 |
|--------------------------|---------------------------------------------------------------------------------|
| <i>srcId</i>             | The ID of the source node.                                                      |
| <i>dstId</i>             | The ID of the destination node.                                                 |
| <i>length↔<br/>MapId</i> | The ID of the map length (as returned by UNetwork::registerLengthMap).          |
| <i>discDist</i>          | The value that should be assigned as distance between disconnected nodes.       |
| <i>discNbHops</i>        | The value that should be assigned as number of hops between disconnected nodes. |

## Returns

A pair containing a pointer to the path and its length.

## 9.17.4.12 operator=() [1/2]

```
template<typename Network = UNetwork<>, typename DistType = double, typename NbHopsType =
std::size_t>
Dijkstra& LinkPred::Dijkstra< Network, DistType, NbHopsType >::operator= (
    Dijkstra< Network, DistType, NbHopsType > && that ) [default]
```

Move assignment operator.

## Parameters

|             |                     |
|-------------|---------------------|
| <i>that</i> | The object to move. |
|-------------|---------------------|

**9.17.4.13 operator=()** [2/2]

```
template<typename Network = UNetwork<>, typename DistType = double, typename NbHopsType =
std::size_t>
Dijkstra& LinkPred::Dijkstra< Network, DistType, NbHopsType >::operator= (
    Dijkstra< Network, DistType, NbHopsType > const & that ) [default]
```

Copy assignment operator.

## Parameters

|             |                     |
|-------------|---------------------|
| <i>that</i> | The object to copy. |
|-------------|---------------------|

**9.17.4.14 registerLengthMap()**

```
template<typename Network = UNetwork<>, typename DistType = double, typename NbHopsType =
std::size_t>
LengthMapIdType LinkPred::Dijkstra< Network, DistType, NbHopsType >::registerLengthMap (
    EdgeLengthMapSP length )
```

Register a length map.

## Parameters

|               |                 |
|---------------|-----------------|
| <i>length</i> | The length map. |
|---------------|-----------------|

## Returns

The ID of the length map.

**9.17.4.15 setNet()**

```
template<typename Network = UNetwork<>, typename DistType = double, typename NbHopsType =
std::size_t>
void LinkPred::Dijkstra< Network, DistType, NbHopsType >::setNet (
    std::shared_ptr< const Network > net ) [inline]
```

Update the network. All length maps are invalidated.

## Parameters

|            |  |
|------------|--|
| <i>net</i> |  |
|------------|--|

**9.17.4.16 unregisterLengthMap()**

```
template<typename Network = UNetwork<>, typename DistType = double, typename NbHopsType =
std::size_t>
void LinkPred::Dijkstra< Network, DistType, NbHopsType >::unregisterLengthMap (
    LengthMapIdType const & lengthMapId )
```

Unregister a length map.

## Parameters

|                          |                           |
|--------------------------|---------------------------|
| <i>length↔<br/>MapId</i> | The ID of the length map. |
|--------------------------|---------------------------|

The documentation for this class was generated from the following file:

- [include/linkpred/graphalg/shortestpaths/dijkstra.hpp](#)

## 9.18 LinkPred::DJIDPredictor< Network, EdgeRndIt, ScoreRndIt, EdgeRndOutIt > Class Template Reference

Common neighbor link predictor adapted to directed networks.

```
#include <djidpredictor.hpp>
```

Inheritance diagram for LinkPred::DJIDPredictor< Network, EdgeRndIt, ScoreRndIt, EdgeRndOutIt >:

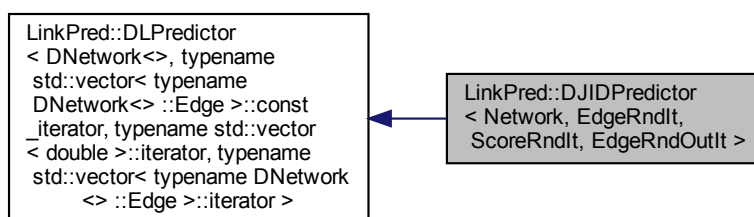



Collaboration diagram for LinkPred::DJIDPredictor< Network, EdgeRndIt, ScoreRndIt, EdgeRndOutIt >:

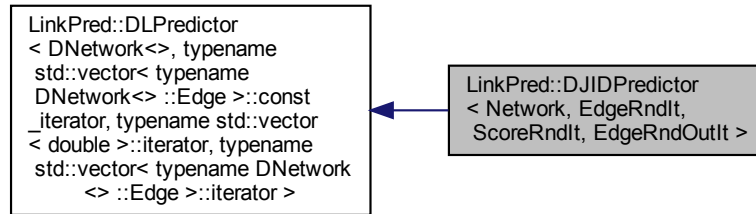

## Public Member Functions

- DJIDPredictor (std::shared\_ptr< Network const > net)
- DJIDPredictor (DJIDPredictor const &that)=default
- DJIDPredictor & operator= (DJIDPredictor const &that)=default
- DJIDPredictor (DJIDPredictor &&that)=default
- DJIDPredictor & operator= (DJIDPredictor &&that)=default
- virtual void init ()
- virtual void learn ()
- virtual void predict (EdgeRndIt begin, EdgeRndIt end, ScoreRndIt scores)
- virtual double score (Edge const &e)
- virtual std::size\_t top (std::size\_t k, EdgeRndOutIt eit, ScoreRndIt sit)
- virtual ~DJIDPredictor ()=default

## Additional Inherited Members

### 9.18.1 Detailed Description

```

template<typename Network = DNetwork<>, typename EdgeRndIt = typename std::vector<typename Network::Edge>::const_iterator,
typename ScoreRndIt = typename std::vector<double>::iterator, typename EdgeRndOutIt = typename std::vector<typename Network::Edge>::iterator>
class LinkPred::DJIDPredictor< Network, EdgeRndIt, ScoreRndIt, EdgeRndOutIt >
  
```

Common neighbor link predictor adapted to directed networks.

#### Template Parameters

|                         |                                                   |
|-------------------------|---------------------------------------------------|
| <i>Network</i>          | The network type.                                 |
| <i>Edge↵<br/>RndIt</i>  | A random iterator type used to iterate on edges.  |
| <i>Score↵<br/>RndIt</i> | A random iterator type used to iterate on scores. |

## 9.18.2 Constructor & Destructor Documentation

### 9.18.2.1 DJIDPredictor() [1/3]

```
template<typename Network = DNetwork<>, typename EdgeRndIt = typename std::vector<typename
Network::Edge>::const_iterator, typename ScoreRndIt = typename std::vector<double>::iterator,
typename EdgeRndOutIt = typename std::vector<typename Network::Edge>::iterator>
LinkPred::DJIDPredictor< Network, EdgeRndIt, ScoreRndIt, EdgeRndOutIt >::DJIDPredictor (
    std::shared_ptr< Network const > net ) [inline]
```

#### Parameters

|            |              |
|------------|--------------|
| <i>net</i> | The network. |
|------------|--------------|

### 9.18.2.2 DJIDPredictor() [2/3]

```
template<typename Network = DNetwork<>, typename EdgeRndIt = typename std::vector<typename
Network::Edge>::const_iterator, typename ScoreRndIt = typename std::vector<double>::iterator,
typename EdgeRndOutIt = typename std::vector<typename Network::Edge>::iterator>
LinkPred::DJIDPredictor< Network, EdgeRndIt, ScoreRndIt, EdgeRndOutIt >::DJIDPredictor (
    DJIDPredictor< Network, EdgeRndIt, ScoreRndIt, EdgeRndOutIt > const & that )
[default]
```

Copy constructor.

#### Parameters

|             |                     |
|-------------|---------------------|
| <i>that</i> | The object to copy. |
|-------------|---------------------|

### 9.18.2.3 DJIDPredictor() [3/3]

```
template<typename Network = DNetwork<>, typename EdgeRndIt = typename std::vector<typename
Network::Edge>::const_iterator, typename ScoreRndIt = typename std::vector<double>::iterator,
typename EdgeRndOutIt = typename std::vector<typename Network::Edge>::iterator>
LinkPred::DJIDPredictor< Network, EdgeRndIt, ScoreRndIt, EdgeRndOutIt >::DJIDPredictor (
    DJIDPredictor< Network, EdgeRndIt, ScoreRndIt, EdgeRndOutIt > && that ) [default]
```

Move constructor.

#### Parameters

|             |                     |
|-------------|---------------------|
| <i>that</i> | The object to move. |
|-------------|---------------------|

#### 9.18.2.4 ~DJIDPredictor()

```
template<typename Network = DNetwork<>, typename EdgeRndIt = typename std::vector<typename
Network::Edge>::const_iterator, typename ScoreRndIt = typename std::vector<double>::iterator,
typename EdgeRndOutIt = typename std::vector<typename Network::Edge>::iterator>
virtual LinkPred::DJIDPredictor< Network, EdgeRndIt, ScoreRndIt, EdgeRndOutIt >::~DJIDPredictor
( ) [virtual], [default]
```

Destructor.

### 9.18.3 Member Function Documentation

#### 9.18.3.1 init()

```
template<typename Network = DNetwork<>, typename EdgeRndIt = typename std::vector<typename
Network::Edge>::const_iterator, typename ScoreRndIt = typename std::vector<double>::iterator,
typename EdgeRndOutIt = typename std::vector<typename Network::Edge>::iterator>
virtual void LinkPred::DJIDPredictor< Network, EdgeRndIt, ScoreRndIt, EdgeRndOutIt >::init ( )
[inline], [virtual]
```

Initialize the solver.

Implements [LinkPred::DLPredictor< DNetwork<>, typename std::vector< typename DNetwork<> ::Edge >::const\\_iterator, typena](#)

#### 9.18.3.2 learn()

```
template<typename Network = DNetwork<>, typename EdgeRndIt = typename std::vector<typename
Network::Edge>::const_iterator, typename ScoreRndIt = typename std::vector<double>::iterator,
typename EdgeRndOutIt = typename std::vector<typename Network::Edge>::iterator>
virtual void LinkPred::DJIDPredictor< Network, EdgeRndIt, ScoreRndIt, EdgeRndOutIt >::learn (
) [inline], [virtual]
```

Learn.

Implements [LinkPred::DLPredictor< DNetwork<>, typename std::vector< typename DNetwork<> ::Edge >::const\\_iterator, typena](#)

#### 9.18.3.3 operator=() [1/2]

```
template<typename Network = DNetwork<>, typename EdgeRndIt = typename std::vector<typename
Network::Edge>::const_iterator, typename ScoreRndIt = typename std::vector<double>::iterator,
typename EdgeRndOutIt = typename std::vector<typename Network::Edge>::iterator>
DJIDPredictor& LinkPred::DJIDPredictor< Network, EdgeRndIt, ScoreRndIt, EdgeRndOutIt >::operator=
(
    DJIDPredictor< Network, EdgeRndIt, ScoreRndIt, EdgeRndOutIt > && that ) [default]
```

Move assignment operator.

## Parameters

|             |                     |
|-------------|---------------------|
| <i>that</i> | The object to move. |
|-------------|---------------------|

**9.18.3.4 operator=()** [2/2]

```
template<typename Network = DNetwork<>, typename EdgeRndIt = typename std::vector<typename
Network::Edge>::const_iterator, typename ScoreRndIt = typename std::vector<double>::iterator,
typename EdgeRndOutIt = typename std::vector<typename Network::Edge>::iterator>
DJIDPredictor& LinkPred::DJIDPredictor< Network, EdgeRndIt, ScoreRndIt, EdgeRndOutIt >::operator=
(
    DJIDPredictor< Network, EdgeRndIt, ScoreRndIt, EdgeRndOutIt > const & that )
[default]
```

Copy assignment operator.

## Parameters

|             |                     |
|-------------|---------------------|
| <i>that</i> | The object to copy. |
|-------------|---------------------|

**9.18.3.5 predict()**

```
template<typename Network = DNetwork<>, typename EdgeRndIt = typename std::vector<typename
Network::Edge>::const_iterator, typename ScoreRndIt = typename std::vector<double>::iterator,
typename EdgeRndOutIt = typename std::vector<typename Network::Edge>::iterator>
virtual void LinkPred::DJIDPredictor< Network, EdgeRndIt, ScoreRndIt, EdgeRndOutIt >::predict
(
    EdgeRndIt begin,
    EdgeRndIt end,
    ScoreRndIt scores ) [virtual]
```

Predict the links.

## Parameters

|               |                                         |
|---------------|-----------------------------------------|
| <i>begin</i>  | Beginning of the links to be predicted. |
| <i>end</i>    | end of the links to be predicted.       |
| <i>scores</i> | Beginning of scores.                    |

Reimplemented from [LinkPred::DLPredictor< DNetwork<>, typename std::vector< typename DNetwork<> ::Edge >::const\\_iterator](#)

**9.18.3.6 score()**

```
template<typename Network = DNetwork<>, typename EdgeRndIt = typename std::vector<typename
Network::Edge>::const_iterator, typename ScoreRndIt = typename std::vector<double>::iterator,
```

```

typename EdgeRndOutIt = typename std::vector<typename Network::Edge>::iterator>
virtual double LinkPred::DJIDPredictor< Network, EdgeRndIt, ScoreRndIt, EdgeRndOutIt >::score
(
    Edge const & e ) [virtual]

```

Compute the score of a single edge.

#### Parameters

|          |           |
|----------|-----------|
| <i>e</i> | The edge. |
|----------|-----------|

#### Returns

The score of *e*.

### 9.18.3.7 top()

```

template<typename Network = DNetwork<>, typename EdgeRndIt = typename std::vector<typename
Network::Edge>::const_iterator, typename ScoreRndIt = typename std::vector<double>::iterator,
typename EdgeRndOutIt = typename std::vector<typename Network::Edge>::iterator>
virtual std::size_t LinkPred::DJIDPredictor< Network, EdgeRndIt, ScoreRndIt, EdgeRndOutIt >↔
::top (
    std::size_t k,
    EdgeRndOutIt eit,
    ScoreRndIt sit ) [virtual]

```

Finds the *k* negative edges with the top score. Ties are broken randomly.

#### Parameters

|            |                                                                                                         |
|------------|---------------------------------------------------------------------------------------------------------|
| <i>k</i>   | The number of edges to find.                                                                            |
| <i>eit</i> | An output iterator where the edges are written.                                                         |
| <i>sit</i> | An output iterator where the scores are written. The scores are written in the same order as the edges. |

#### Returns

The number of negative edges inserted. It is the minimum between *k* and the number of negative edges in the network.

Reimplemented from [LinkPred::DLPredictor< DNetwork<>, typename std::vector< typename DNetwork<> ::Edge >::const\\_iterator](#)

The documentation for this class was generated from the following file:

- [include/linkpred/predictors/directed/djidpredictor.hpp](#)

## 9.19 LinkPred::DLCPredictor< Network, EdgeRndIt, ScoreRndIt, EdgeRndOutIt > Class Template Reference

Common neighbor link predictor adapted to directed networks.

```
#include <dlcppredictor.hpp>
```

Inheritance diagram for LinkPred::DLCPredictor< Network, EdgeRndIt, ScoreRndIt, EdgeRndOutIt >:

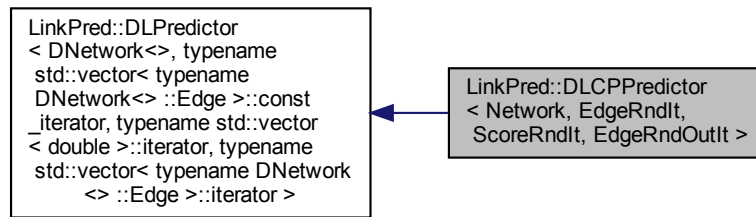

Collaboration diagram for LinkPred::DLCPredictor< Network, EdgeRndIt, ScoreRndIt, EdgeRndOutIt >:

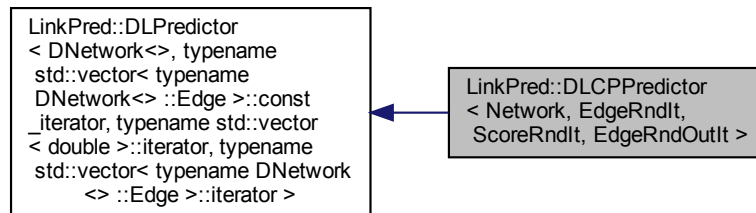

### Public Member Functions

- [DLCPredictor](#) (std::shared\_ptr< [Network](#) const > net)
- [DLCPredictor](#) ([DLCPredictor](#) const &that)=default
- [DLCPredictor](#) & operator= ([DLCPredictor](#) const &that)=default
- [DLCPredictor](#) ([DLCPredictor](#) &&that)=default
- [DLCPredictor](#) & operator= ([DLCPredictor](#) &&that)=default
- virtual void [init](#) ()
- virtual void [learn](#) ()
- virtual void [predict](#) ([EdgeRndIt](#) begin, [EdgeRndIt](#) end, [ScoreRndIt](#) scores)
- virtual double [score](#) ([Edge](#) const &e)
- virtual [~DLCPredictor](#) ()=default

## Additional Inherited Members

### 9.19.1 Detailed Description

```
template<typename Network = DNetwork<>, typename EdgeRndIt = typename std::vector<typename Network::Edge>::const_iterator,
typename ScoreRndIt = typename std::vector<double>::iterator, typename EdgeRndOutIt = typename std::vector<typename Network::Edge>::iterator>
class LinkPred::DLCPredictor< Network, EdgeRndIt, ScoreRndIt, EdgeRndOutIt >
```

Common neighbor link predictor adapted to directed networks.

#### Template Parameters

|                   |                                                   |
|-------------------|---------------------------------------------------|
| <i>Network</i>    | The network type.                                 |
| <i>EdgeRndIt</i>  | A random iterator type used to iterate on edges.  |
| <i>ScoreRndIt</i> | A random iterator type used to iterate on scores. |

### 9.19.2 Constructor & Destructor Documentation

#### 9.19.2.1 DLCPredictor() [1/3]

```
template<typename Network = DNetwork<>, typename EdgeRndIt = typename std::vector<typename
Network::Edge>::const_iterator, typename ScoreRndIt = typename std::vector<double>::iterator,
typename EdgeRndOutIt = typename std::vector<typename Network::Edge>::iterator>
LinkPred::DLCPredictor< Network, EdgeRndIt, ScoreRndIt, EdgeRndOutIt >::DLCPredictor (
    std::shared_ptr< Network const > net ) [inline]
```

#### Parameters

|            |              |
|------------|--------------|
| <i>net</i> | The network. |
|------------|--------------|

#### 9.19.2.2 DLCPredictor() [2/3]

```
template<typename Network = DNetwork<>, typename EdgeRndIt = typename std::vector<typename
Network::Edge>::const_iterator, typename ScoreRndIt = typename std::vector<double>::iterator,
typename EdgeRndOutIt = typename std::vector<typename Network::Edge>::iterator>
LinkPred::DLCPredictor< Network, EdgeRndIt, ScoreRndIt, EdgeRndOutIt >::DLCPredictor (
    DLCPredictor< Network, EdgeRndIt, ScoreRndIt, EdgeRndOutIt > const & that )
[default]
```

Copy constructor.

## Parameters

|             |                     |
|-------------|---------------------|
| <i>that</i> | The object to copy. |
|-------------|---------------------|

**9.19.2.3 DLCPredictor()** [3/3]

```
template<typename Network = DNetwork<>, typename EdgeRndIt = typename std::vector<typename
Network::Edge>::const_iterator, typename ScoreRndIt = typename std::vector<double>::iterator,
typename EdgeRndOutIt = typename std::vector<typename Network::Edge>::iterator>
LinkPred::DLCPredictor< Network, EdgeRndIt, ScoreRndIt, EdgeRndOutIt >::DLCPredictor (
    DLCPredictor< Network, EdgeRndIt, ScoreRndIt, EdgeRndOutIt > && that ) [default]
```

Move constructor.

## Parameters

|             |                     |
|-------------|---------------------|
| <i>that</i> | The object to move. |
|-------------|---------------------|

**9.19.2.4 ~DLCPredictor()**

```
template<typename Network = DNetwork<>, typename EdgeRndIt = typename std::vector<typename
Network::Edge>::const_iterator, typename ScoreRndIt = typename std::vector<double>::iterator,
typename EdgeRndOutIt = typename std::vector<typename Network::Edge>::iterator>
virtual LinkPred::DLCPredictor< Network, EdgeRndIt, ScoreRndIt, EdgeRndOutIt >::~DLCPredictor
( ) [virtual], [default]
```

Finds the k negative edges with the top score. Ties are broken randomly.

## Parameters

|            |                                                                                                         |
|------------|---------------------------------------------------------------------------------------------------------|
| <i>k</i>   | The number of edges to find.                                                                            |
| <i>eit</i> | An output iterator where the edges are written.                                                         |
| <i>sit</i> | An output iterator where the scores are written. The scores are written in the same order as the edges. |

## Returns

The number of negative edges inserted. It is the minimum between k and the number of negative edges in the network. Destructor.

**9.19.3 Member Function Documentation**



### 9.19.3.1 init()

```
template<typename Network = DNetwork<>, typename EdgeRndIt = typename std::vector<typename
Network::Edge>::const_iterator, typename ScoreRndIt = typename std::vector<double>::iterator,
typename EdgeRndOutIt = typename std::vector<typename Network::Edge>::iterator>
virtual void LinkPred::DLCPredictor< Network, EdgeRndIt, ScoreRndIt, EdgeRndOutIt >::init ( )
[inline], [virtual]
```

Initialize the solver.

Implements [LinkPred::DLPredictor< DNetwork<>, typename std::vector< typename DNetwork<> ::Edge >::const\\_iterator, typen](#)

### 9.19.3.2 learn()

```
template<typename Network = DNetwork<>, typename EdgeRndIt = typename std::vector<typename
Network::Edge>::const_iterator, typename ScoreRndIt = typename std::vector<double>::iterator,
typename EdgeRndOutIt = typename std::vector<typename Network::Edge>::iterator>
virtual void LinkPred::DLCPredictor< Network, EdgeRndIt, ScoreRndIt, EdgeRndOutIt >::learn (
) [inline], [virtual]
```

Learn.

Implements [LinkPred::DLPredictor< DNetwork<>, typename std::vector< typename DNetwork<> ::Edge >::const\\_iterator, typen](#)

### 9.19.3.3 operator=() [1/2]

```
template<typename Network = DNetwork<>, typename EdgeRndIt = typename std::vector<typename
Network::Edge>::const_iterator, typename ScoreRndIt = typename std::vector<double>::iterator,
typename EdgeRndOutIt = typename std::vector<typename Network::Edge>::iterator>
DLCPredictor& LinkPred::DLCPredictor< Network, EdgeRndIt, ScoreRndIt, EdgeRndOutIt >::operator=
(
    DLCPredictor< Network, EdgeRndIt, ScoreRndIt, EdgeRndOutIt > && that ) [default]
```

Move assignment operator.

#### Parameters

|             |                     |
|-------------|---------------------|
| <i>that</i> | The object to move. |
|-------------|---------------------|

### 9.19.3.4 operator=() [2/2]

```
template<typename Network = DNetwork<>, typename EdgeRndIt = typename std::vector<typename
Network::Edge>::const_iterator, typename ScoreRndIt = typename std::vector<double>::iterator,
typename EdgeRndOutIt = typename std::vector<typename Network::Edge>::iterator>
```

```

DLCPredictor& LinkPred::DLCPredictor< Network, EdgeRndIt, ScoreRndIt, EdgeRndOutIt >::operator=
(
    DLCPredictor< Network, EdgeRndIt, ScoreRndIt, EdgeRndOutIt > const & that )
[default]

```

Copy assignment operator.

#### Parameters

|             |                     |
|-------------|---------------------|
| <i>that</i> | The object to copy. |
|-------------|---------------------|

### 9.19.3.5 predict()

```

template<typename Network = DNetwork<>, typename EdgeRndIt = typename std::vector<typename
Network::Edge>::const_iterator, typename ScoreRndIt = typename std::vector<double>::iterator,
typename EdgeRndOutIt = typename std::vector<typename Network::Edge>::iterator>
virtual void LinkPred::DLCPredictor< Network, EdgeRndIt, ScoreRndIt, EdgeRndOutIt >::predict
(
    EdgeRndIt begin,
    EdgeRndIt end,
    ScoreRndIt scores ) [virtual]

```

Predict the links.

#### Parameters

|               |                                         |
|---------------|-----------------------------------------|
| <i>begin</i>  | Beginning of the links to be predicted. |
| <i>end</i>    | end of the links to be predicted.       |
| <i>scores</i> | Beginning of scores.                    |

Reimplemented from [LinkPred::DLPredictor< DNetwork<>, typename std::vector< typename DNetwork<> ::Edge >::const\\_iterator](#)

### 9.19.3.6 score()

```

template<typename Network = DNetwork<>, typename EdgeRndIt = typename std::vector<typename
Network::Edge>::const_iterator, typename ScoreRndIt = typename std::vector<double>::iterator,
typename EdgeRndOutIt = typename std::vector<typename Network::Edge>::iterator>
virtual double LinkPred::DLCPredictor< Network, EdgeRndIt, ScoreRndIt, EdgeRndOutIt >::score
(
    Edge const & e ) [virtual]

```

Compute the score of a single edge.

#### Parameters

|          |           |
|----------|-----------|
| <i>e</i> | The edge. |
|----------|-----------|

**Returns**

The score of e.

The documentation for this class was generated from the following file:

- include/linkpred/predictors/directed/dlcppredictor.hpp

## 9.20 LinkPred::DLHNPredictor< Network, EdgeRndIt, ScoreRndIt, EdgeRndOutIt > Class Template Reference

Common neighbor link predictor adapted to directed networks.

```
#include <dlhnpredictor.hpp>
```

Inheritance diagram for LinkPred::DLHNPredictor< Network, EdgeRndIt, ScoreRndIt, EdgeRndOutIt >:

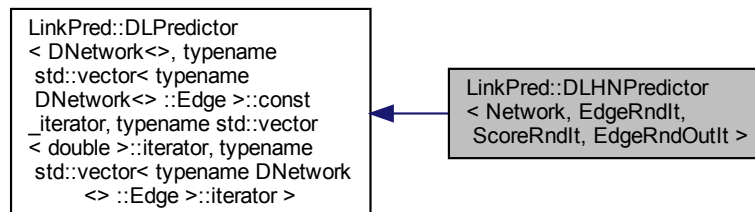

Collaboration diagram for LinkPred::DLHNPredictor< Network, EdgeRndIt, ScoreRndIt, EdgeRndOutIt >:

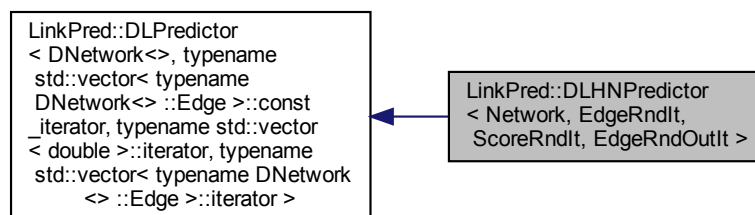

## Public Member Functions

- [DLHNPredictor](#) (std::shared\_ptr< [Network](#) const > net)
- [DLHNPredictor](#) ([DLHNPredictor](#) const &that)=default
- [DLHNPredictor](#) & operator= ([DLHNPredictor](#) const &that)=default
- [DLHNPredictor](#) ([DLHNPredictor](#) &&that)=default
- [DLHNPredictor](#) & operator= ([DLHNPredictor](#) &&that)=default
- virtual void [init](#) ()
- virtual void [learn](#) ()
- virtual void [predict](#) ([EdgeRndIt](#) begin, [EdgeRndIt](#) end, [ScoreRndIt](#) scores)
- virtual double [score](#) ([Edge](#) const &e)
- virtual std::size\_t [top](#) (std::size\_t k, [EdgeRndOutIt](#) eit, [ScoreRndIt](#) sit)
- virtual [~DLHNPredictor](#) ()=default

## Additional Inherited Members

### 9.20.1 Detailed Description

```
template<typename Network = DNetwork<>, typename EdgeRndIt = typename std::vector<typename Network::Edge>::const_iterator,
typename ScoreRndIt = typename std::vector<double>::iterator, typename EdgeRndOutIt = typename std::vector<typename Network::Edge>::iterator>
class LinkPred::DLHNPredictor< Network, EdgeRndIt, ScoreRndIt, EdgeRndOutIt >
```

Common neighbor link predictor adapted to directed networks.

#### Template Parameters

|                                               |                                                   |
|-----------------------------------------------|---------------------------------------------------|
| <i>Network</i>                                | The network type.                                 |
| <i>Edge<math>\leftrightarrow</math>RndIt</i>  | A random iterator type used to iterate on edges.  |
| <i>Score<math>\leftrightarrow</math>RndIt</i> | A random iterator type used to iterate on scores. |

### 9.20.2 Constructor & Destructor Documentation

#### 9.20.2.1 DLHNPredictor() [1/3]

```
template<typename Network = DNetwork<>, typename EdgeRndIt = typename std::vector<typename
Network::Edge>::const_iterator, typename ScoreRndIt = typename std::vector<double>::iterator,
typename EdgeRndOutIt = typename std::vector<typename Network::Edge>::iterator>
LinkPred::DLHNPredictor< Network, EdgeRndIt, ScoreRndIt, EdgeRndOutIt >::DLHNPredictor (
    std::shared_ptr< Network const > net ) [inline]
```

#### Parameters

|            |              |
|------------|--------------|
| <i>net</i> | The network. |
|------------|--------------|

### 9.20.2.2 DLHNPredictor() [2/3]

```
template<typename Network = DNetwork<>, typename EdgeRndIt = typename std::vector<typename
Network::Edge>::const_iterator, typename ScoreRndIt = typename std::vector<double>::iterator,
typename EdgeRndOutIt = typename std::vector<typename Network::Edge>::iterator>
LinkPred::DLHNPredictor< Network, EdgeRndIt, ScoreRndIt, EdgeRndOutIt >::DLHNPredictor (
    DLHNPredictor< Network, EdgeRndIt, ScoreRndIt, EdgeRndOutIt > const & that )
[default]
```

Copy constructor.

#### Parameters

|             |                     |
|-------------|---------------------|
| <i>that</i> | The object to copy. |
|-------------|---------------------|

### 9.20.2.3 DLHNPredictor() [3/3]

```
template<typename Network = DNetwork<>, typename EdgeRndIt = typename std::vector<typename
Network::Edge>::const_iterator, typename ScoreRndIt = typename std::vector<double>::iterator,
typename EdgeRndOutIt = typename std::vector<typename Network::Edge>::iterator>
LinkPred::DLHNPredictor< Network, EdgeRndIt, ScoreRndIt, EdgeRndOutIt >::DLHNPredictor (
    DLHNPredictor< Network, EdgeRndIt, ScoreRndIt, EdgeRndOutIt > && that ) [default]
```

Move constructor.

#### Parameters

|             |                     |
|-------------|---------------------|
| <i>that</i> | The object to move. |
|-------------|---------------------|

### 9.20.2.4 ~DLHNPredictor()

```
template<typename Network = DNetwork<>, typename EdgeRndIt = typename std::vector<typename
Network::Edge>::const_iterator, typename ScoreRndIt = typename std::vector<double>::iterator,
typename EdgeRndOutIt = typename std::vector<typename Network::Edge>::iterator>
virtual LinkPred::DLHNPredictor< Network, EdgeRndIt, ScoreRndIt, EdgeRndOutIt >::~~DLHNPredictor
( ) [virtual], [default]
```

Destructor.

## 9.20.3 Member Function Documentation

### 9.20.3.1 init()

```
template<typename Network = DNetwork<>, typename EdgeRndIt = typename std::vector<typename
Network::Edge>::const_iterator, typename ScoreRndIt = typename std::vector<double>::iterator,
typename EdgeRndOutIt = typename std::vector<typename Network::Edge>::iterator>
virtual void LinkPred::DLHNPredictor< Network, EdgeRndIt, ScoreRndIt, EdgeRndOutIt >::init ( )
[inline], [virtual]
```

Initialize the solver.

Implements [LinkPred::DLPredictor< DNetwork<>, typename std::vector< typename DNetwork<> ::Edge >::const\\_iterator, typen](#)

### 9.20.3.2 learn()

```
template<typename Network = DNetwork<>, typename EdgeRndIt = typename std::vector<typename
Network::Edge>::const_iterator, typename ScoreRndIt = typename std::vector<double>::iterator,
typename EdgeRndOutIt = typename std::vector<typename Network::Edge>::iterator>
virtual void LinkPred::DLHNPredictor< Network, EdgeRndIt, ScoreRndIt, EdgeRndOutIt >::learn (
) [inline], [virtual]
```

Learn.

Implements [LinkPred::DLPredictor< DNetwork<>, typename std::vector< typename DNetwork<> ::Edge >::const\\_iterator, typen](#)

### 9.20.3.3 operator=() [1/2]

```
template<typename Network = DNetwork<>, typename EdgeRndIt = typename std::vector<typename
Network::Edge>::const_iterator, typename ScoreRndIt = typename std::vector<double>::iterator,
typename EdgeRndOutIt = typename std::vector<typename Network::Edge>::iterator>
DLHNPredictor& LinkPred::DLHNPredictor< Network, EdgeRndIt, ScoreRndIt, EdgeRndOutIt >::operator=
(
    DLHNPredictor< Network, EdgeRndIt, ScoreRndIt, EdgeRndOutIt > && that ) [default]
```

Move assignment operator.

Parameters

|             |                     |
|-------------|---------------------|
| <i>that</i> | The object to move. |
|-------------|---------------------|

### 9.20.3.4 operator=() [2/2]

```
template<typename Network = DNetwork<>, typename EdgeRndIt = typename std::vector<typename
Network::Edge>::const_iterator, typename ScoreRndIt = typename std::vector<double>::iterator,
typename EdgeRndOutIt = typename std::vector<typename Network::Edge>::iterator>
```

```
DLHNPredictor& LinkPred::DLHNPredictor< Network, EdgeRndIt, ScoreRndIt, EdgeRndOutIt >::operator=
(
    DLHNPredictor< Network, EdgeRndIt, ScoreRndIt, EdgeRndOutIt > const & that )
[default]
```

Copy assignment operator.

#### Parameters

|             |                     |
|-------------|---------------------|
| <i>that</i> | The object to copy. |
|-------------|---------------------|

### 9.20.3.5 predict()

```
template<typename Network = DNetwork<>, typename EdgeRndIt = typename std::vector<typename
Network::Edge>::const_iterator, typename ScoreRndIt = typename std::vector<double>::iterator,
typename EdgeRndOutIt = typename std::vector<typename Network::Edge>::iterator>
virtual void LinkPred::DLHNPredictor< Network, EdgeRndIt, ScoreRndIt, EdgeRndOutIt >::predict
(
    EdgeRndIt begin,
    EdgeRndIt end,
    ScoreRndIt scores ) [virtual]
```

Predict the links.

#### Parameters

|               |                                         |
|---------------|-----------------------------------------|
| <i>begin</i>  | Beginning of the links to be predicted. |
| <i>end</i>    | end of the links to be predicted.       |
| <i>scores</i> | Beginning of scores.                    |

Reimplemented from [LinkPred::DLPredictor< DNetwork<>, typename std::vector< typename DNetwork<> ::Edge >::const\\_iterator](#)

### 9.20.3.6 score()

```
template<typename Network = DNetwork<>, typename EdgeRndIt = typename std::vector<typename
Network::Edge>::const_iterator, typename ScoreRndIt = typename std::vector<double>::iterator,
typename EdgeRndOutIt = typename std::vector<typename Network::Edge>::iterator>
virtual double LinkPred::DLHNPredictor< Network, EdgeRndIt, ScoreRndIt, EdgeRndOutIt >::score
(
    Edge const & e ) [virtual]
```

Compute the score of a single edge.

#### Parameters

|          |           |
|----------|-----------|
| <i>e</i> | The edge. |
|----------|-----------|

**Returns**

The score of *e*.

**9.20.3.7 top()**

```
template<typename Network = DNetwork<>, typename EdgeRndIt = typename std::vector<typename
Network::Edge>::const_iterator, typename ScoreRndIt = typename std::vector<double>::iterator,
typename EdgeRndOutIt = typename std::vector<typename Network::Edge>::iterator>
virtual std::size_t LinkPred::DLHNPredictor< Network, EdgeRndIt, ScoreRndIt, EdgeRndOutIt >↵
::top (
    std::size_t k,
    EdgeRndOutIt eit,
    ScoreRndIt sit ) [virtual]
```

Finds the *k* negative edges with the top score. Ties are broken randomly.

**Parameters**

|            |                                                                                                         |
|------------|---------------------------------------------------------------------------------------------------------|
| <i>k</i>   | The number of edges to find.                                                                            |
| <i>eit</i> | An output iterator where the edges are written.                                                         |
| <i>sit</i> | An output iterator where the scores are written. The scores are written in the same order as the edges. |

**Returns**

The number of negative edges inserted. It is the minimum between *k* and the number of negative edges in the network.

Reimplemented from [LinkPred::DLPredictor< DNetwork<>, typename std::vector< typename DNetwork<> ::Edge >::const\\_iterator](#)

The documentation for this class was generated from the following file:

- [include/linkpred/predictors/directed/dlhnpredictor.hpp](#)

## 9.21 LinkPred::DLPredictor< NetworkT, EdgeRndItT, ScoreRndItT, EdgeRndOutItT > Class Template Reference

The interface of a link predictor in a directed network.

```
#include <dlpredictor.hpp>
```

**Public Types**

- using [Network](#) = NetworkT
- using [EdgeRndIt](#) = EdgeRndItT
- using [ScoreRndIt](#) = ScoreRndItT
- using [EdgeRndOutIt](#) = EdgeRndOutItT
- using [NodeID](#) = typename Network::NodeID
- using [Edge](#) = typename Network::Edge



## Public Member Functions

- [DLPredictor](#) (std::shared\_ptr< [Network](#) const > net)
- [DLPredictor](#) ([DLPredictor](#) const &that)=default
- [DLPredictor](#) & [operator=](#) ([DLPredictor](#) const &that)=default
- [DLPredictor](#) ([DLPredictor](#) &&that)=default
- [DLPredictor](#) & [operator=](#) ([DLPredictor](#) &&that)=default
- virtual void [init](#) ()=0
- virtual void [learn](#) ()=0
- virtual void [predict](#) ([EdgeRndIt](#) begin, [EdgeRndIt](#) end, [ScoreRndIt](#) scores)
- virtual std::pair< typename [Network](#)::NonEdgeIt, typename [Network](#)::NonEdgeIt > [predictNeg](#) ([ScoreRndIt](#) scores)
- virtual double [score](#) ([Edge](#) const &e)=0
- virtual std::size\_t [top](#) (std::size\_t k, [EdgeRndOutIt](#) eit, [ScoreRndIt](#) sit)
- auto [getNet](#) () const
- const std::string & [getName](#) () const
- void [setName](#) (const std::string &name)
- virtual [~DLPredictor](#) ()=default

### 9.21.1 Detailed Description

```
template<typename NetworkT = DNetwork<>, typename EdgeRndItT = typename std::vector<typename NetworkT::Edge>::const_iterator,
typename ScoreRndItT = typename std::vector<double>::iterator, typename EdgeRndOutItT = typename std::vector<typename NetworkT::Edge>::iterator>
class LinkPred::DLPredictor< NetworkT, EdgeRndItT, ScoreRndItT, EdgeRndOutItT >
```

The interface of a link predictor in a directed network.

#### Template Parameters

|                    |                                                   |
|--------------------|---------------------------------------------------|
| <i>NetworkT</i>    | The network type.                                 |
| <i>EdgeRndItT</i>  | A random iterator type used to iterate on edges.  |
| <i>ScoreRndItT</i> | A random iterator type used to iterate on scores. |

#### Parameters

|                      |                                          |
|----------------------|------------------------------------------|
| <i>EdgeRndOutItT</i> | A random output iterator to write edges. |
|----------------------|------------------------------------------|

### 9.21.2 Member Typedef Documentation

#### 9.21.2.1 Edge

```
template<typename NetworkT = DNetwork<>, typename EdgeRndItT = typename std::vector<typename NetworkT::Edge>::const_iterator,
typename ScoreRndItT = typename std::vector<double>::iterator,
typename EdgeRndOutItT = typename std::vector<typename NetworkT::Edge>::iterator>
using LinkPred::DLPredictor< NetworkT, EdgeRndItT, ScoreRndItT, EdgeRndOutItT >::Edge = typename Network::Edge
```

The edges type.

### 9.21.2.2 EdgeRndIt

```
template<typename NetworkT = DNetwork<>, typename EdgeRndItT = typename std::vector<typename
NetworkT::Edge>::const_iterator, typename ScoreRndItT = typename std::vector<double>::iterator,
typename EdgeRndOutItT = typename std::vector<typename NetworkT::Edge>::iterator>
using LinkPred::DLPredictor< NetworkT, EdgeRndItT, ScoreRndItT, EdgeRndOutItT >::EdgeRndIt =
EdgeRndItT
```

A random iterator type used to iterate on edges.

### 9.21.2.3 EdgeRndOutIt

```
template<typename NetworkT = DNetwork<>, typename EdgeRndItT = typename std::vector<typename
NetworkT::Edge>::const_iterator, typename ScoreRndItT = typename std::vector<double>::iterator,
typename EdgeRndOutItT = typename std::vector<typename NetworkT::Edge>::iterator>
using LinkPred::DLPredictor< NetworkT, EdgeRndItT, ScoreRndItT, EdgeRndOutItT >::EdgeRndOutIt
= EdgeRndOutItT
```

A random output iterator to write edges.

### 9.21.2.4 Network

```
template<typename NetworkT = DNetwork<>, typename EdgeRndItT = typename std::vector<typename
NetworkT::Edge>::const_iterator, typename ScoreRndItT = typename std::vector<double>::iterator,
typename EdgeRndOutItT = typename std::vector<typename NetworkT::Edge>::iterator>
using LinkPred::DLPredictor< NetworkT, EdgeRndItT, ScoreRndItT, EdgeRndOutItT >::Network =
NetworkT
```

The network type.

### 9.21.2.5 NodeID

```
template<typename NetworkT = DNetwork<>, typename EdgeRndItT = typename std::vector<typename
NetworkT::Edge>::const_iterator, typename ScoreRndItT = typename std::vector<double>::iterator,
typename EdgeRndOutItT = typename std::vector<typename NetworkT::Edge>::iterator>
using LinkPred::DLPredictor< NetworkT, EdgeRndItT, ScoreRndItT, EdgeRndOutItT >::NodeID =
typename NetworkT::NodeID
```

The node IDs type.

### 9.21.2.6 ScoreRndIt

```
template<typename NetworkT = DNetwork<>, typename EdgeRndItT = typename std::vector<typename
NetworkT::Edge>::const_iterator, typename ScoreRndItT = typename std::vector<double>::iterator,
typename EdgeRndOutItT = typename std::vector<typename NetworkT::Edge>::iterator>
using LinkPred::DLPredictor< NetworkT, EdgeRndItT, ScoreRndItT, EdgeRndOutItT >::ScoreRndIt =
ScoreRndItT
```

A random iterator type used to iterate on scores.

## 9.21.3 Constructor & Destructor Documentation

### 9.21.3.1 DLPredictor() [1/3]

```
template<typename NetworkT = DNetwork<>, typename EdgeRndItT = typename std::vector<typename
NetworkT::Edge>::const_iterator, typename ScoreRndItT = typename std::vector<double>::iterator,
typename EdgeRndOutItT = typename std::vector<typename NetworkT::Edge>::iterator>
LinkPred::DLPredictor< NetworkT, EdgeRndItT, ScoreRndItT, EdgeRndOutItT >::DLPredictor (
    std::shared_ptr< NetworkT const > net ) [inline]
```

Constructor.

Parameters

|            |              |
|------------|--------------|
| <i>net</i> | The network. |
|------------|--------------|

### 9.21.3.2 DLPredictor() [2/3]

```
template<typename NetworkT = DNetwork<>, typename EdgeRndItT = typename std::vector<typename
NetworkT::Edge>::const_iterator, typename ScoreRndItT = typename std::vector<double>::iterator,
typename EdgeRndOutItT = typename std::vector<typename NetworkT::Edge>::iterator>
LinkPred::DLPredictor< NetworkT, EdgeRndItT, ScoreRndItT, EdgeRndOutItT >::DLPredictor (
    DLPredictor< NetworkT, EdgeRndItT, ScoreRndItT, EdgeRndOutItT > const & that )
[default]
```

Copy constructor.

Parameters

|             |                     |
|-------------|---------------------|
| <i>that</i> | The object to copy. |
|-------------|---------------------|

### 9.21.3.3 DLPredictor() [3/3]

```
template<typename NetworkT = DNetwork<>, typename EdgeRndItT = typename std::vector<typename
NetworkT::Edge>::const_iterator, typename ScoreRndItT = typename std::vector<double>::iterator,
typename EdgeRndOutItT = typename std::vector<typename NetworkT::Edge>::iterator>
LinkPred::DLPredictor< NetworkT, EdgeRndItT, ScoreRndItT, EdgeRndOutItT >::DLPredictor (
    DLPredictor< NetworkT, EdgeRndItT, ScoreRndItT, EdgeRndOutItT > && that ) [default]
```

Move constructor.

Parameters

|             |                     |
|-------------|---------------------|
| <i>that</i> | The object to move. |
|-------------|---------------------|

### 9.21.3.4 ~DLPredictor()

```
template<typename NetworkT = DNetwork<>, typename EdgeRndItT = typename std::vector<typename
NetworkT::Edge>::const_iterator, typename ScoreRndItT = typename std::vector<double>::iterator,
typename EdgeRndOutItT = typename std::vector<typename NetworkT::Edge>::iterator>
virtual LinkPred::DLPredictor< NetworkT, EdgeRndItT, ScoreRndItT, EdgeRndOutItT >::~DLPredictor
( ) [virtual], [default]
```

Destructor.

## 9.21.4 Member Function Documentation

### 9.21.4.1 getName()

```
template<typename NetworkT = DNetwork<>, typename EdgeRndItT = typename std::vector<typename
NetworkT::Edge>::const_iterator, typename ScoreRndItT = typename std::vector<double>::iterator,
typename EdgeRndOutItT = typename std::vector<typename NetworkT::Edge>::iterator>
const std::string& LinkPred::DLPredictor< NetworkT, EdgeRndItT, ScoreRndItT, EdgeRndOutItT >↔
::getName ( ) const [inline]
```

#### Returns

The name of the predictor.

### 9.21.4.2 getNet()

```
template<typename NetworkT = DNetwork<>, typename EdgeRndItT = typename std::vector<typename
NetworkT::Edge>::const_iterator, typename ScoreRndItT = typename std::vector<double>::iterator,
typename EdgeRndOutItT = typename std::vector<typename NetworkT::Edge>::iterator>
auto LinkPred::DLPredictor< NetworkT, EdgeRndItT, ScoreRndItT, EdgeRndOutItT >::getNet ( )
const [inline]
```

#### Returns

The network.

## 9.21.4.3 init()

```
template<typename NetworkT = DNetwork<>, typename EdgeRndItT = typename std::vector<typename
NetworkT::Edge>::const_iterator, typename ScoreRndItT = typename std::vector<double>::iterator,
typename EdgeRndOutItT = typename std::vector<typename NetworkT::Edge>::iterator>
virtual void LinkPred::DLPredictor< NetworkT, EdgeRndItT, ScoreRndItT, EdgeRndOutItT >::init (
) [pure virtual]
```

Initialize the solver.

Implemented in [LinkPred::DPSTPredictor< Network, EdgeRndIt, ScoreRndIt, EdgeRndOutIt >](#), [LinkPred::DADAPredictor< Network, EdgeRndIt, ScoreRndIt, EdgeRndOutIt >](#), [LinkPred::DCNEPredictor< Network, EdgeRndIt, ScoreRndIt, EdgeRndOutIt >](#), [LinkPred::DHDIPredictor< Network, EdgeRndIt, ScoreRndIt, EdgeRndOutIt >](#), [LinkPred::DHPIPredictor< Network, EdgeRndIt, ScoreRndIt, EdgeRndOutIt >](#), [LinkPred::DJIDPredictor< Network, EdgeRndIt, ScoreRndIt, EdgeRndOutIt >](#), [LinkPred::DLCPredictor< Network, EdgeRndIt, ScoreRndIt, EdgeRndOutIt >](#), [LinkPred::DLHNPredictor< Network, EdgeRndIt, ScoreRndIt, EdgeRndOutIt >](#), [LinkPred::DPATPredictor< Network, EdgeRndIt, ScoreRndIt, EdgeRndOutIt >](#), [LinkPred::DSAPredictor< Network, EdgeRndIt, ScoreRndIt, EdgeRndOutIt >](#), and [LinkPred::DSOIPredictor< Network, EdgeRndIt, ScoreRndIt, EdgeRndOutIt >](#).

## 9.21.4.4 learn()

```
template<typename NetworkT = DNetwork<>, typename EdgeRndItT = typename std::vector<typename
NetworkT::Edge>::const_iterator, typename ScoreRndItT = typename std::vector<double>::iterator,
typename EdgeRndOutItT = typename std::vector<typename NetworkT::Edge>::iterator>
virtual void LinkPred::DLPredictor< NetworkT, EdgeRndItT, ScoreRndItT, EdgeRndOutItT >::learn
( ) [pure virtual]
```

Learning.

Implemented in [LinkPred::DPSTPredictor< Network, EdgeRndIt, ScoreRndIt, EdgeRndOutIt >](#), [LinkPred::DADAPredictor< Network, EdgeRndIt, ScoreRndIt, EdgeRndOutIt >](#), [LinkPred::DCNEPredictor< Network, EdgeRndIt, ScoreRndIt, EdgeRndOutIt >](#), [LinkPred::DHDIPredictor< Network, EdgeRndIt, ScoreRndIt, EdgeRndOutIt >](#), [LinkPred::DHPIPredictor< Network, EdgeRndIt, ScoreRndIt, EdgeRndOutIt >](#), [LinkPred::DJIDPredictor< Network, EdgeRndIt, ScoreRndIt, EdgeRndOutIt >](#), [LinkPred::DLCPredictor< Network, EdgeRndIt, ScoreRndIt, EdgeRndOutIt >](#), [LinkPred::DLHNPredictor< Network, EdgeRndIt, ScoreRndIt, EdgeRndOutIt >](#), [LinkPred::DPATPredictor< Network, EdgeRndIt, ScoreRndIt, EdgeRndOutIt >](#), [LinkPred::DSAPredictor< Network, EdgeRndIt, ScoreRndIt, EdgeRndOutIt >](#), and [LinkPred::DSOIPredictor< Network, EdgeRndIt, ScoreRndIt, EdgeRndOutIt >](#).

## 9.21.4.5 operator=() [1/2]

```
template<typename NetworkT = DNetwork<>, typename EdgeRndItT = typename std::vector<typename
NetworkT::Edge>::const_iterator, typename ScoreRndItT = typename std::vector<double>::iterator,
typename EdgeRndOutItT = typename std::vector<typename NetworkT::Edge>::iterator>
DLPredictor& LinkPred::DLPredictor< NetworkT, EdgeRndItT, ScoreRndItT, EdgeRndOutItT >::operator=
(
    DLPredictor< NetworkT, EdgeRndItT, ScoreRndItT, EdgeRndOutItT > && that ) [default]
```

Move assignment operator.

## Parameters

|             |                     |
|-------------|---------------------|
| <i>that</i> | The object to move. |
|-------------|---------------------|

#### 9.21.4.6 operator=() [2/2]

```
template<typename NetworkT = DNetwork<>, typename EdgeRndItT = typename std::vector<typename
NetworkT::Edge>::const_iterator, typename ScoreRndItT = typename std::vector<double>::iterator,
typename EdgeRndOutItT = typename std::vector<typename NetworkT::Edge>::iterator>
DLPredictor& LinkPred::DLPredictor< NetworkT, EdgeRndItT, ScoreRndItT, EdgeRndOutItT >::operator=
(
    DLPredictor< NetworkT, EdgeRndItT, ScoreRndItT, EdgeRndOutItT > const & that )
[default]
```

Copy assignment operator.

##### Parameters

|             |                     |
|-------------|---------------------|
| <i>that</i> | The object to copy. |
|-------------|---------------------|

#### 9.21.4.7 predict()

```
template<typename NetworkT = DNetwork<>, typename EdgeRndItT = typename std::vector<typename
NetworkT::Edge>::const_iterator, typename ScoreRndItT = typename std::vector<double>::iterator,
typename EdgeRndOutItT = typename std::vector<typename NetworkT::Edge>::iterator>
virtual void LinkPred::DLPredictor< NetworkT, EdgeRndItT, ScoreRndItT, EdgeRndOutItT >::predict
(
    EdgeRndIt begin,
    EdgeRndIt end,
    ScoreRndIt scores ) [inline], [virtual]
```

Predict links.

##### Parameters

|               |                                                         |
|---------------|---------------------------------------------------------|
| <i>begin</i>  | Iterator to the first edge to be predicted.             |
| <i>end</i>    | end Iterator to one past the last edge to be predicted. |
| <i>scores</i> | Random output iterator to store the scores.             |

Reimplemented in [LinkPred::DADAPredictor< Network, EdgeRndIt, ScoreRndIt, EdgeRndOutIt >](#), [LinkPred::DCNEPredictor< Network, EdgeRndIt, ScoreRndIt, EdgeRndOutIt >](#), [LinkPred::DHDIPredictor< Network, EdgeRndIt, ScoreRndIt, EdgeRndOutIt >](#), [LinkPred::DHPIPredictor< Network, EdgeRndIt, ScoreRndIt, EdgeRndOutIt >](#), [LinkPred::DJIDPredictor< Network, EdgeRndIt, ScoreRndIt, EdgeRndOutIt >](#), [LinkPred::DLCPPredictor< Network, EdgeRndIt, ScoreRndIt, EdgeRndOutIt >](#), [LinkPred::DLHNPredictor< Network, EdgeRndIt, ScoreRndIt, EdgeRndOutIt >](#), [LinkPred::DPATPredictor< Network, EdgeRndIt, ScoreRndIt, EdgeRndOutIt >](#), [LinkPred::DSALPredictor< Network, EdgeRndIt, ScoreRndIt, EdgeRndOutIt >](#), and [LinkPred::DSOIPredictor< Network, EdgeRndIt, ScoreRndIt, EdgeRndOutIt >](#).

#### 9.21.4.8 predictNeg()

```
template<typename NetworkT = DNetwork<>, typename EdgeRndItT = typename std::vector<typename
NetworkT::Edge>::const_iterator, typename ScoreRndItT = typename std::vector<double>::iterator,
```

```

typename EdgeRndOutItT = typename std::vector<typename NetworkT::Edge>::iterator>
virtual std::pair<typename NetworkT::NonEdgeIt, typename NetworkT::NonEdgeIt> LinkPred::DLPredictor<
NetworkT, EdgeRndItT, ScoreRndItT, EdgeRndOutItT >::predictNeg (
    ScoreRndIt scores ) [inline], [virtual]

```

Predict score for all negative (non-existing) links in the network.

#### Parameters

|                     |                                             |
|---------------------|---------------------------------------------|
| <code>scores</code> | Random output iterator to store the scores. |
|---------------------|---------------------------------------------|

#### Returns

A pair of iterators begin and end to the range of non-existing links predicted by the method.

### 9.21.4.9 score()

```

template<typename NetworkT = DNetwork<>, typename EdgeRndItT = typename std::vector<typename
NetworkT::Edge>::const_iterator, typename ScoreRndItT = typename std::vector<double>::iterator,
typename EdgeRndOutItT = typename std::vector<typename NetworkT::Edge>::iterator>
virtual double LinkPred::DLPredictor< NetworkT, EdgeRndItT, ScoreRndItT, EdgeRndOutItT >↔
::score (
    Edge const & e ) [pure virtual]

```

Compute the score of a single edge.

#### Parameters

|                |           |
|----------------|-----------|
| <code>e</code> | The edge. |
|----------------|-----------|

#### Returns

The score of e.

### 9.21.4.10 setName()

```

template<typename NetworkT = DNetwork<>, typename EdgeRndItT = typename std::vector<typename
NetworkT::Edge>::const_iterator, typename ScoreRndItT = typename std::vector<double>::iterator,
typename EdgeRndOutItT = typename std::vector<typename NetworkT::Edge>::iterator>
void LinkPred::DLPredictor< NetworkT, EdgeRndItT, ScoreRndItT, EdgeRndOutItT >::setName (
    const std::string & name ) [inline]

```

Set the name of the predictor.

## Parameters

|             |                                |
|-------------|--------------------------------|
| <i>name</i> | The new name of the predictor. |
|-------------|--------------------------------|

**9.21.4.11 top()**

```
template<typename NetworkT = DNetwork<>, typename EdgeRndItT = typename std::vector<typename
NetworkT::Edge>::const_iterator, typename ScoreRndItT = typename std::vector<double>::iterator,
typename EdgeRndOutItT = typename std::vector<typename NetworkT::Edge>::iterator>
virtual std::size_t LinkPred::DLPredictor< NetworkT, EdgeRndItT, ScoreRndItT, EdgeRndOutItT
>::top (
    std::size_t k,
    EdgeRndOutIt eit,
    ScoreRndIt sit ) [inline], [virtual]
```

Finds the k negative edges with the top score. Ties are broken randomly.

## Parameters

|            |                                                                                                         |
|------------|---------------------------------------------------------------------------------------------------------|
| <i>k</i>   | The number of edges to find.                                                                            |
| <i>eit</i> | An output iterator where the edges are written.                                                         |
| <i>sit</i> | An output iterator where the scores are written. The scores are written in the same order as the edges. |

## Returns

The number of negative edges inserted. It is the minimum between k and the number of negative edges in the network.

Reimplemented in [LinkPred::DADAPredictor< Network, EdgeRndIt, ScoreRndIt, EdgeRndOutIt >](#), [LinkPred::DCNEPredictor< Network, EdgeRndIt, ScoreRndIt, EdgeRndOutIt >](#), [LinkPred::DHDIPredictor< Network, EdgeRndIt, ScoreRndIt, EdgeRndOutIt >](#), [LinkPred::DHPIPredictor< Network, EdgeRndIt, ScoreRndIt, EdgeRndOutIt >](#), [LinkPred::DJIDPredictor< Network, EdgeRndIt, ScoreRndIt, EdgeRndOutIt >](#), [LinkPred::DLHNPredictor< Network, EdgeRndIt, ScoreRndIt, EdgeRndOutIt >](#), [LinkPred::DSAPredictor< Network, EdgeRndIt, ScoreRndIt, EdgeRndOutIt >](#), and [LinkPred::DSOIPredictor< Network, EdgeRndIt, ScoreRndIt, EdgeRndOutIt >](#).

The documentation for this class was generated from the following file:

- [include/linkpred/predictors/directed/dlpredictor.hpp](#)

## 9.22 LinkPred::DNetwork< LabelT, NodeIDT, EdgeT > Class Template Reference

This class represents a directed network in the sense of graph theory.

```
#include <dnetwork.hpp>
```



## Classes

- class [EdgeMap](#)  
*An edge map.*
- class [NodeDegIt](#)  
*Node-degree iterator. This class can be used to iterate over pairs of node IDs and in and out degrees.*
- class [NodeMap](#)  
*A node map.*
- class [NodeSMap](#)  
*A sparse node map.*
- class [NonEdgeIt](#)  
*Nonedges iterator.*
- class [RndEdgeIt](#)  
*Randomized edges iterator.*
- class [RndNodeIt](#)  
*Randomized Nodes iterator.*
- class [RndNonEdgeIt](#)  
*Randomized nonedges iterator.*

## Public Types

- using [Label](#) = LabelT
- using [NodeID](#) = NodeIDT
- using [Edge](#) = EdgeT
- using [LabelIt](#) = typename [Bhmap](#)< [Label](#), [NodeID](#) >::k\_const\_iterator
- using [NodeIt](#) = typename [Bhmap](#)< [Label](#), [NodeID](#) >::p\_const\_iterator
- using [EdgeIt](#) = typename std::vector< [Edge](#) >::const\_iterator
- template<typename ValueT >  
using [NodeMapSP](#) = std::shared\_ptr< [NodeMap](#)< ValueT > >
- template<typename ValueT >  
using [NodeSMapSP](#) = std::shared\_ptr< [NodeSMap](#)< ValueT > >
- template<typename ValueT >  
using [EdgeMapSP](#) = std::shared\_ptr< [EdgeMap](#)< ValueT > >

## Public Member Functions

- [DNetwork](#) ()=default
- [DNetwork](#) (std::vector< std::pair< [Label](#), [Label](#) >> const &edges)
- [DNetwork](#) ([DNetwork](#) const &that)=default
- [DNetwork](#) & operator= ([DNetwork](#) const &that)=default
- [DNetwork](#) ([DNetwork](#) &&that)=default
- [DNetwork](#) & operator= ([DNetwork](#) &&that)=default
- std::pair< [NodeID](#), bool > [addNode](#) ([Label](#) const &nodeId)
- [NodeID](#) [getID](#) ([Label](#) const &label) const
- [Label](#) [getLabel](#) ([NodeID](#) const &iid) const
- [LabelIt](#) [findLabel](#) ([Label](#) const &label) const
- [NodeIt](#) [findNode](#) ([NodeID](#) const &iid) const
- void [addEdge](#) ([NodeID](#) const &i, [NodeID](#) const &j)
- std::size\_t [coupleOrd](#) ([Edge](#) const &e) const
- std::size\_t [coupleAtOrd](#) (std::size\_t ord) const
- [EdgeIt](#) [neighbBegin](#) ([NodeID](#) const &iid) const
- [EdgeIt](#) [neighbEnd](#) ([NodeID](#) const &iid) const

- [Edgelt outNeighborsBegin](#) (NodeID const &iid) const
- [Edgelt outNeighborsEnd](#) (NodeID const &iid) const
- [Edgelt inNeighborsBegin](#) (NodeID const &iid) const
- [Edgelt inNeighborsEnd](#) (NodeID const &iid) const
- [std::size\\_t getDeg](#) (NodeID const &iid) const
- [std::pair< std::size\\_t, std::size\\_t > getInOutDeg](#) (NodeID const &iid) const
- [std::size\\_t getOutDeg](#) (NodeID const &iid) const
- [std::size\\_t getInDeg](#) (NodeID const &iid) const
- [bool isEdge](#) (NodeID const &ii, NodeID const &ij) const
- [bool isEdge](#) (Edge const &edge) const
- [std::size\\_t getNbNodes](#) () const
- [std::size\\_t getNbCouples](#) () const
- [std::size\\_t getNbEdges](#) () const
- [std::size\\_t getNbNonEdges](#) () const
- [double getAvgDeg](#) () const
- [std::size\\_t getMaxDeg](#) () const
- [std::size\\_t getMinDeg](#) () const
- [double getAvgOutDeg](#) () const
- [std::size\\_t getMaxOutDeg](#) () const
- [std::size\\_t getMinOutDeg](#) () const
- [double getAvgInDeg](#) () const
- [std::size\\_t getMaxInDeg](#) () const
- [std::size\\_t getMinInDeg](#) () const
- [void assemble](#) ()
- [void shuffle](#) (long int seed)
- [LabelIt labelsBegin](#) () const
- [LabelIt labelsEnd](#) () const
- [NodeIt nodesBegin](#) () const
- [NodeIt nodesEnd](#) () const
- [NodeDegIt nodesDegBegin](#) () const
- [NodeDegIt nodesDegEnd](#) () const
- [Edgelt edgesBegin](#) () const
- [Edgelt edgesEnd](#) () const
- [Edgelt outEdgesBegin](#) () const
- [Edgelt outEdgesEnd](#) () const
- [Edgelt inEdgesBegin](#) () const
- [Edgelt inEdgesEnd](#) () const
- [NonEdgelt nonEdgesBegin](#) () const
- [NonEdgelt nonEdgesEnd](#) () const
- [RndNodeIt rndNodesBegin](#) (double ratio, long int seed) const
- [RndNodeIt rndNodesEnd](#) () const
- [RndNonEdgelt rndNonEdgesBegin](#) (double ratio, long int seed) const
- [RndNonEdgelt rndNonEdgesEnd](#) () const
- [RndEdgelt rndEdgesBegin](#) (double ratio, long int seed) const
- [RndEdgelt rndEdgesEnd](#) () const
- [void getDegStat](#) (std::size\_t &minDeg, std::size\_t &maxDeg, double &avgDeg) const
- [void getOutDegStat](#) (std::size\_t &minOutDeg, std::size\_t &maxOutDeg, double &avgOutDeg) const
- [void getInDegStat](#) (std::size\_t &minInDeg, std::size\_t &maxInDeg, double &avgInDeg) const
- [template<typename ValueT >](#)  
[NodeMap< ValueT > createNodeMap](#) () const
- [template<typename ValueT >](#)  
[NodeMapSP< ValueT > createNodeMapSP](#) () const
- [template<typename ValueT >](#)  
[NodeSMap< ValueT > createNodeSMap](#) (ValueT const &defVal) const

- template<typename ValueT >  
NodeSMapSP< ValueT > createNodeSMapSP (ValueT const &defVal) const
- template<typename ValueT >  
EdgeMap< ValueT > createEdgeMap () const
- template<typename ValueT >  
EdgeMapSP< ValueT > createEdgeMapSP () const
- std::shared\_ptr< std::vector< Edge > > readEdges (std::string fileName) const
- void write (std::string fileName) const
- void print () const
- std::size\_t getNbPaths (NodeID const &srcId, NodeID const &endId, std::size\_t length) const
- template<typename ForwardIterator >  
void printEdges (ForwardIterator edgesBegin, ForwardIterator edgesEnd) const
- virtual ~DNetwork ()=default

## Static Public Member Functions

- static Edge makeEdge (NodeID const &i, NodeID const &j)
- static Edge reverseEdge (Edge const &e)
- static const NodeID start (Edge const &edge)
- static const NodeID end (Edge const &edge)
- static bool compareEdgeEnd (Edge const &e1, Edge const &e2)
- static std::shared\_ptr< DNetwork< Label, NodeID, Edge > > read (std::string fileName, bool ignoreRepetitions=false, bool ignoreLoops=false)

### 9.22.1 Detailed Description

```
template<typename LabelT = std::string, typename NodeIDT = unsigned int, typename EdgeT = unsigned long long int>
class LinkPred::DNetwork< LabelT, NodeIDT, EdgeT >
```

This class represents a directed network in the sense of graph theory.

#### Template Parameters

|                |                                                                                                           |
|----------------|-----------------------------------------------------------------------------------------------------------|
| <i>LabelT</i>  | Type of external labels.                                                                                  |
| <i>NodeIDT</i> | Type of internal node IDs. This must be an unsigned integral type.                                        |
| <i>EdgeT</i>   | Type of edges. This must be an unsigned integral type having at least double the size of NodeID DNetwork. |

### 9.22.2 Member Typedef Documentation

#### 9.22.2.1 Edge

```
template<typename LabelT = std::string, typename NodeIDT = unsigned int, typename EdgeT =
unsigned long long int>
using LinkPred::DNetwork< LabelT, NodeIDT, EdgeT >::Edge = EdgeT
```

Internal edge type.

### 9.22.2.2 Edgelt

```
template<typename LabelT = std::string, typename NodeIDT = unsigned int, typename EdgeT =
unsigned long long int>
using LinkPred::DNetwork< LabelT, NodeIDT, EdgeT >::EdgeIt = typename std::vector<Edge>↵
::const_iterator
```

Edge iterator.

### 9.22.2.3 EdgeMapSP

```
template<typename LabelT = std::string, typename NodeIDT = unsigned int, typename EdgeT =
unsigned long long int>
template<typename ValueT >
using LinkPred::DNetwork< LabelT, NodeIDT, EdgeT >::EdgeMapSP = std::shared_ptr<EdgeMap<ValueT>
>
```

Shared pointer to an edge map.

### 9.22.2.4 Label

```
template<typename LabelT = std::string, typename NodeIDT = unsigned int, typename EdgeT =
unsigned long long int>
using LinkPred::DNetwork< LabelT, NodeIDT, EdgeT >::Label = LabelT
```

External label type.

### 9.22.2.5 LabelIt

```
template<typename LabelT = std::string, typename NodeIDT = unsigned int, typename EdgeT =
unsigned long long int>
using LinkPred::DNetwork< LabelT, NodeIDT, EdgeT >::LabelIt = typename Bhmap<Label, NodeID>↵
::k_const_iterator
```

External node iterator that offers the mapping to internal IDs.

### 9.22.2.6 NodeID

```
template<typename LabelT = std::string, typename NodeIDT = unsigned int, typename EdgeT =
unsigned long long int>
using LinkPred::DNetwork< LabelT, NodeIDT, EdgeT >::NodeID = NodeIDT
```

Internal node ID type.

### 9.22.2.7 NodeIt

```
template<typename LabelT = std::string, typename NodeIDT = unsigned int, typename EdgeT =
unsigned long long int>
using LinkPred::DNetwork< LabelT, NodeIDT, EdgeT >::NodeIt = typename Bhmap<Label, NodeID>↵
::p_const_iterator
```

Internal node iterator (random access iterator).

### 9.22.2.8 NodeMapSP

```
template<typename LabelT = std::string, typename NodeIDT = unsigned int, typename EdgeT =
unsigned long long int>
template<typename ValueT >
using LinkPred::DNetwork< LabelT, NodeIDT, EdgeT >::NodeMapSP = std::shared_ptr<NodeMap<ValueT>
>
```

Shared pointer to a node map.

### 9.22.2.9 NodeSMapSP

```
template<typename LabelT = std::string, typename NodeIDT = unsigned int, typename EdgeT =
unsigned long long int>
template<typename ValueT >
using LinkPred::DNetwork< LabelT, NodeIDT, EdgeT >::NodeSMapSP = std::shared_ptr<NodeSMap<ValueT>
>
```

Shared pointer to a node map.

## 9.22.3 Constructor & Destructor Documentation

### 9.22.3.1 DNetwork() [1/4]

```
template<typename LabelT = std::string, typename NodeIDT = unsigned int, typename EdgeT =
unsigned long long int>
LinkPred::DNetwork< LabelT, NodeIDT, EdgeT >::DNetwork ( ) [default]
```

Default constructor.

### 9.22.3.2 DNetwork() [2/4]

```
template<typename LabelT = std::string, typename NodeIDT = unsigned int, typename EdgeT =
unsigned long long int>
LinkPred::DNetwork< LabelT, NodeIDT, EdgeT >::DNetwork (
    std::vector< std::pair< Label, Label >> const & edges )
```

Build the network from a list of edges. The network is assembled within this constructor.

#### Parameters

|              |                |
|--------------|----------------|
| <i>edges</i> | List of edges. |
|--------------|----------------|

### 9.22.3.3 DNetwork() [3/4]

```
template<typename LabelT = std::string, typename NodeIDT = unsigned int, typename EdgeT =
unsigned long long int>
LinkPred::DNetwork< LabelT, NodeIDT, EdgeT >::DNetwork (
    DNetwork< LabelT, NodeIDT, EdgeT > const & that ) [default]
```

Copy constructor.

#### Parameters

|             |                     |
|-------------|---------------------|
| <i>that</i> | The object to copy. |
|-------------|---------------------|

### 9.22.3.4 DNetwork() [4/4]

```
template<typename LabelT = std::string, typename NodeIDT = unsigned int, typename EdgeT =
unsigned long long int>
LinkPred::DNetwork< LabelT, NodeIDT, EdgeT >::DNetwork (
    DNetwork< LabelT, NodeIDT, EdgeT > && that ) [default]
```

Move constructor.

#### Parameters

|             |                     |
|-------------|---------------------|
| <i>that</i> | The object to move. |
|-------------|---------------------|

### 9.22.3.5 ~DNetwork()

```
template<typename LabelT = std::string, typename NodeIDT = unsigned int, typename EdgeT =
unsigned long long int>
virtual LinkPred::DNetwork< LabelT, NodeIDT, EdgeT >::~~DNetwork ( ) [virtual], [default]
```

Destructor.

## 9.22.4 Member Function Documentation

### 9.22.4.1 addEdge()

```
template<typename LabelT = std::string, typename NodeIDT = unsigned int, typename EdgeT =
unsigned long long int>
void LinkPred::DNetwork< LabelT, NodeIDT, EdgeT >::addEdge (
    NodeID const & i,
    NodeID const & j )
```

Add an edge.

## Parameters

|          |                    |
|----------|--------------------|
| <i>i</i> | The starting node. |
| <i>j</i> | The end node.      |

## 9.22.4.2 addNode()

```
template<typename LabelT = std::string, typename NodeIDT = unsigned int, typename EdgeT =
unsigned long long int>
std::pair<NodeID, bool> LinkPred::DNetwork< LabelT, NodeIDT, EdgeT >::addNode (
    Label const & nodeId )
```

Add a node.

## Parameters

|               |                     |
|---------------|---------------------|
| <i>nodeId</i> | The ID of the node. |
|---------------|---------------------|

## Returns

An std::pair, where first is the internal ID, and second is a boolean which is true if the node is actually added.

## 9.22.4.3 assemble()

```
template<typename LabelT = std::string, typename NodeIDT = unsigned int, typename EdgeT =
unsigned long long int>
void LinkPred::DNetwork< LabelT, NodeIDT, EdgeT >::assemble ( )
```

Assemble the network. No changes to the network are allowed after calling this method.

## 9.22.4.4 compareEdgeEnd()

```
template<typename LabelT = std::string, typename NodeIDT = unsigned int, typename EdgeT =
unsigned long long int>
static bool LinkPred::DNetwork< LabelT, NodeIDT, EdgeT >::compareEdgeEnd (
    Edge const & e1,
    Edge const & e2 ) [inline], [static]
```

Compare edge ends.

## Parameters

|           |              |
|-----------|--------------|
| <i>e1</i> | First edge.  |
| <i>e2</i> | Second edge. |

**Returns**

True if the end of e1 is smaller than that of e2 (comparison is based on node IDs).

**9.22.4.5 coupleAtOrd()**

```
template<typename LabelT = std::string, typename NodeIDT = unsigned int, typename EdgeT =
unsigned long long int>
std::size_t LinkPred::DNetwork< LabelT, NodeIDT, EdgeT >::coupleAtOrd (
    std::size_t ord ) const [inline]
```

**Parameters**

|            |                       |
|------------|-----------------------|
| <i>ord</i> | The order of an edge. |
|------------|-----------------------|

**Returns**

The edge given its order.

**9.22.4.6 coupleOrd()**

```
template<typename LabelT = std::string, typename NodeIDT = unsigned int, typename EdgeT =
unsigned long long int>
std::size_t LinkPred::DNetwork< LabelT, NodeIDT, EdgeT >::coupleOrd (
    Edge const & e ) const [inline]
```

**Parameters**

|          |          |
|----------|----------|
| <i>e</i> | An edge. |
|----------|----------|

**Returns**

The order of the edge

**9.22.4.7 createEdgeMap()**

```
template<typename LabelT = std::string, typename NodeIDT = unsigned int, typename EdgeT =
unsigned long long int>
template<typename ValueT >
EdgeMap<ValueT> LinkPred::DNetwork< LabelT, NodeIDT, EdgeT >::createEdgeMap ( ) const [inline]
```



## Template Parameters

|               |             |
|---------------|-------------|
| <i>ValueT</i> | Value type. |
|---------------|-------------|

## Returns

An edge map.

**9.22.4.8 createEdgeMapSP()**

```
template<typename LabelT = std::string, typename NodeIDT = unsigned int, typename EdgeT =
unsigned long long int>
template<typename ValueT >
EdgeMapSP<ValueT> LinkPred::DNetwork< LabelT, NodeIDT, EdgeT >::createEdgeMapSP ( ) const
[inline]
```

## Template Parameters

|               |             |
|---------------|-------------|
| <i>ValueT</i> | Value type. |
|---------------|-------------|

## Returns

A pointer to an edge map.

**9.22.4.9 createNodeMap()**

```
template<typename LabelT = std::string, typename NodeIDT = unsigned int, typename EdgeT =
unsigned long long int>
template<typename ValueT >
NodeMap<ValueT> LinkPred::DNetwork< LabelT, NodeIDT, EdgeT >::createNodeMap ( ) const [inline]
```

## Template Parameters

|               |             |
|---------------|-------------|
| <i>ValueT</i> | Value type. |
|---------------|-------------|

## Returns

A node map.

**9.22.4.10 createNodeMapSP()**

```
template<typename LabelT = std::string, typename NodeIDT = unsigned int, typename EdgeT =
unsigned long long int>
```

```
template<typename ValueT >
NodeMapSP<ValueT> LinkPred::DNetwork< LabelT, NodeIDT, EdgeT >::createNodeMapSP ( ) const
[inline]
```

#### Template Parameters

|               |             |
|---------------|-------------|
| <i>ValueT</i> | Value type. |
|---------------|-------------|

#### Returns

A pointer to a node map.

### 9.22.4.11 createNodeSMap()

```
template<typename LabelT = std::string, typename NodeIDT = unsigned int, typename EdgeT =
unsigned long long int>
template<typename ValueT >
NodeSMap<ValueT> LinkPred::DNetwork< LabelT, NodeIDT, EdgeT >::createNodeSMap (
    ValueT const & defVal ) const [inline]
```

#### Template Parameters

|               |             |
|---------------|-------------|
| <i>ValueT</i> | Value type. |
|---------------|-------------|

#### Returns

A sparse node map.

### 9.22.4.12 createNodeSMapSP()

```
template<typename LabelT = std::string, typename NodeIDT = unsigned int, typename EdgeT =
unsigned long long int>
template<typename ValueT >
NodeSMapSP<ValueT> LinkPred::DNetwork< LabelT, NodeIDT, EdgeT >::createNodeSMapSP (
    ValueT const & defVal ) const [inline]
```

#### Template Parameters

|               |             |
|---------------|-------------|
| <i>ValueT</i> | Value type. |
|---------------|-------------|

#### Returns

A pointer to a sparse node map.

**9.22.4.13 edgesBegin()**

```
template<typename LabelT = std::string, typename NodeIDT = unsigned int, typename EdgeT =
unsigned long long int>
EdgeIt LinkPred::DNetwork< LabelT, NodeIDT, EdgeT >::edgesBegin ( ) const [inline]
```

**Returns**

A read-only (constant) iterator that points to the first edge (with internal ID). Edges are ordered by source node.

**9.22.4.14 edgesEnd()**

```
template<typename LabelT = std::string, typename NodeIDT = unsigned int, typename EdgeT =
unsigned long long int>
EdgeIt LinkPred::DNetwork< LabelT, NodeIDT, EdgeT >::edgesEnd ( ) const [inline]
```

**Returns**

A read-only (constant) iterator that points one past the last edge (with internal ID). Edges are ordered by source node.

**9.22.4.15 end()**

```
template<typename LabelT = std::string, typename NodeIDT = unsigned int, typename EdgeT =
unsigned long long int>
static const NodeID LinkPred::DNetwork< LabelT, NodeIDT, EdgeT >::end (
    Edge const & edge ) [inline], [static]
```

**Parameters**

|             |          |
|-------------|----------|
| <i>edge</i> | An edge. |
|-------------|----------|

**Returns**

The end node of edge.

**9.22.4.16 findLabel()**

```
template<typename LabelT = std::string, typename NodeIDT = unsigned int, typename EdgeT =
unsigned long long int>
LabelIt LinkPred::DNetwork< LabelT, NodeIDT, EdgeT >::findLabel (
    Label const & label ) const [inline]
```

#### Parameters

|              |                      |
|--------------|----------------------|
| <i>label</i> | An external node ID. |
|--------------|----------------------|

#### Returns

Iterator to the external node ID.

#### 9.22.4.17 findNode()

```
template<typename LabelT = std::string, typename NodeIDT = unsigned int, typename EdgeT =
unsigned long long int>
NodeIt LinkPred::DNetwork< LabelT, NodeIDT, EdgeT >::findNode (
    NodeID const & iid ) const [inline]
```

#### Parameters

|            |                      |
|------------|----------------------|
| <i>iid</i> | An internal node ID. |
|------------|----------------------|

#### Returns

Iterator to the internal node ID.

#### 9.22.4.18 getAvgDeg()

```
template<typename LabelT = std::string, typename NodeIDT = unsigned int, typename EdgeT =
unsigned long long int>
double LinkPred::DNetwork< LabelT, NodeIDT, EdgeT >::getAvgDeg ( ) const [inline]
```

#### Returns

Average degree. Can only be called after the network is assembled.

#### 9.22.4.19 getAvgInDeg()

```
template<typename LabelT = std::string, typename NodeIDT = unsigned int, typename EdgeT =
unsigned long long int>
double LinkPred::DNetwork< LabelT, NodeIDT, EdgeT >::getAvgInDeg ( ) const [inline]
```

#### Returns

Average in-degree. Can only be called after the network is assembled.

**9.22.4.20 getAvgOutDeg()**

```
template<typename LabelT = std::string, typename NodeIDT = unsigned int, typename EdgeT =
unsigned long long int>
double LinkPred::DNetwork< LabelT, NodeIDT, EdgeT >::getAvgOutDeg ( ) const [inline]
```

**Returns**

Average out-degree. Can only be called after the network is assembled.

**9.22.4.21 getDeg()**

```
template<typename LabelT = std::string, typename NodeIDT = unsigned int, typename EdgeT =
unsigned long long int>
std::size_t LinkPred::DNetwork< LabelT, NodeIDT, EdgeT >::getDeg (
    NodeID const & iid ) const [inline]
```

**Parameters**

|            |                       |
|------------|-----------------------|
| <i>iid</i> | The node internal ID. |
|------------|-----------------------|

**Returns**

The degree of node iid (sum of in and out-degrees).

**9.22.4.22 getDegStat()**

```
template<typename LabelT = std::string, typename NodeIDT = unsigned int, typename EdgeT =
unsigned long long int>
void LinkPred::DNetwork< LabelT, NodeIDT, EdgeT >::getDegStat (
    std::size_t & minDeg,
    std::size_t & maxDeg,
    double & avgDeg ) const [inline]
```

Compute some degree statistics.

**Parameters**

|               |                                    |
|---------------|------------------------------------|
| <i>minDeg</i> | (output parameter) minimum degree. |
| <i>maxDeg</i> | (output parameter) maximum degree. |
| <i>avgDeg</i> | (output parameter) average degree. |

### 9.22.4.23 getID()

```
template<typename LabelT = std::string, typename NodeIDT = unsigned int, typename EdgeT =
unsigned long long int>
NodeID LinkPred::DNetwork< LabelT, NodeIDT, EdgeT >::getID (
    Label const & label ) const [inline]
```

Translates from external label to internal IDs. This method is  $O(\log n)$ , where  $n$  is the number of nodes.

#### Parameters

|              |                         |
|--------------|-------------------------|
| <i>label</i> | An external node label. |
|--------------|-------------------------|

#### Returns

The internal ID of label;

### 9.22.4.24 getInDeg()

```
template<typename LabelT = std::string, typename NodeIDT = unsigned int, typename EdgeT =
unsigned long long int>
std::size_t LinkPred::DNetwork< LabelT, NodeIDT, EdgeT >::getInDeg (
    NodeID const & iid ) const [inline]
```

#### Parameters

|            |                       |
|------------|-----------------------|
| <i>iid</i> | The node internal ID. |
|------------|-----------------------|

#### Returns

The in-degree of node iid.

### 9.22.4.25 getInDegStat()

```
template<typename LabelT = std::string, typename NodeIDT = unsigned int, typename EdgeT =
unsigned long long int>
void LinkPred::DNetwork< LabelT, NodeIDT, EdgeT >::getInDegStat (
    std::size_t & minInDeg,
    std::size_t & maxInDeg,
    double & avgInDeg ) const [inline]
```

Compute some in-degree statistics.

#### Parameters

|                 |                                      |
|-----------------|--------------------------------------|
| <i>minInDeg</i> | (input parameter) minimum in-degree. |
| <i>maxInDeg</i> | (input parameter) maximum in-degree. |
| <i>avgInDeg</i> | (input parameter) average in-degree. |

#### 9.22.4.26 getInOutDeg()

```
template<typename LabelT = std::string, typename NodeIDT = unsigned int, typename EdgeT =
unsigned long long int>
std::pair<std::size_t, std::size_t> LinkPred::DNetwork< LabelT, NodeIDT, EdgeT >::getInOutDeg
(
    NodeID const & iid ) const [inline]
```

##### Parameters

|            |                       |
|------------|-----------------------|
| <i>iid</i> | The node internal ID. |
|------------|-----------------------|

##### Returns

The in and out-degrees of node iid.

#### 9.22.4.27 getLabel()

```
template<typename LabelT = std::string, typename NodeIDT = unsigned int, typename EdgeT =
unsigned long long int>
Label LinkPred::DNetwork< LabelT, NodeIDT, EdgeT >::getLabel (
    NodeID const & iid ) const [inline]
```

##### Parameters

|            |                      |
|------------|----------------------|
| <i>iid</i> | An internal node ID. |
|------------|----------------------|

##### Returns

The external label of the node iid.

#### 9.22.4.28 getMaxDeg()

```
template<typename LabelT = std::string, typename NodeIDT = unsigned int, typename EdgeT =
unsigned long long int>
std::size_t LinkPred::DNetwork< LabelT, NodeIDT, EdgeT >::getMaxDeg ( ) const [inline]
```

##### Returns

Maximum degree. Can only be called after the network is assembled.

#### 9.22.4.29 getMaxInDeg()

```
template<typename LabelT = std::string, typename NodeIDT = unsigned int, typename EdgeT =
unsigned long long int>
std::size_t LinkPred::DNetwork< LabelT, NodeIDT, EdgeT >::getMaxInDeg ( ) const [inline]
```

##### Returns

Maximum in-degree. Can only be called after the network is assembled.

#### 9.22.4.30 getMaxOutDeg()

```
template<typename LabelT = std::string, typename NodeIDT = unsigned int, typename EdgeT =
unsigned long long int>
std::size_t LinkPred::DNetwork< LabelT, NodeIDT, EdgeT >::getMaxOutDeg ( ) const [inline]
```

##### Returns

Maximum out-degree. Can only be called after the network is assembled.

#### 9.22.4.31 getMinDeg()

```
template<typename LabelT = std::string, typename NodeIDT = unsigned int, typename EdgeT =
unsigned long long int>
std::size_t LinkPred::DNetwork< LabelT, NodeIDT, EdgeT >::getMinDeg ( ) const [inline]
```

##### Returns

Minimum degree. Can only be called after the network is assembled.

#### 9.22.4.32 getMinInDeg()

```
template<typename LabelT = std::string, typename NodeIDT = unsigned int, typename EdgeT =
unsigned long long int>
std::size_t LinkPred::DNetwork< LabelT, NodeIDT, EdgeT >::getMinInDeg ( ) const [inline]
```

##### Returns

Minimum in-degree. Can only be called after the network is assembled.



#### 9.22.4.33 getMinOutDeg()

```
template<typename LabelT = std::string, typename NodeIDT = unsigned int, typename EdgeT =
unsigned long long int>
std::size_t LinkPred::DNetwork< LabelT, NodeIDT, EdgeT >::getMinOutDeg ( ) const [inline]
```

##### Returns

Minimum out-degree. Can only be called after the network is assembled.

#### 9.22.4.34 getNbCouples()

```
template<typename LabelT = std::string, typename NodeIDT = unsigned int, typename EdgeT =
unsigned long long int>
std::size_t LinkPred::DNetwork< LabelT, NodeIDT, EdgeT >::getNbCouples ( ) const [inline]
```

##### Returns

The number of couples in the network.

#### 9.22.4.35 getNbEdges()

```
template<typename LabelT = std::string, typename NodeIDT = unsigned int, typename EdgeT =
unsigned long long int>
std::size_t LinkPred::DNetwork< LabelT, NodeIDT, EdgeT >::getNbEdges ( ) const [inline]
```

##### Returns

The number of edges in the network.

#### 9.22.4.36 getNbNodes()

```
template<typename LabelT = std::string, typename NodeIDT = unsigned int, typename EdgeT =
unsigned long long int>
std::size_t LinkPred::DNetwork< LabelT, NodeIDT, EdgeT >::getNbNodes ( ) const [inline]
```

##### Returns

The number of nodes in the network.

#### 9.22.4.37 getNbNonEdges()

```
template<typename LabelT = std::string, typename NodeIDT = unsigned int, typename EdgeT =
unsigned long long int>
std::size_t LinkPred::DNetwork< LabelT, NodeIDT, EdgeT >::getNbNonEdges ( ) const [inline]
```

##### Returns

The number of non-edges in the network.

#### 9.22.4.38 getNbPaths()

```
template<typename LabelT = std::string, typename NodeIDT = unsigned int, typename EdgeT =
unsigned long long int>
std::size_t LinkPred::DNetwork< LabelT, NodeIDT, EdgeT >::getNbPaths (
    NodeID const & srcId,
    NodeID const & endId,
    std::size_t length ) const
```

##### Parameters

|               |                     |
|---------------|---------------------|
| <i>srcId</i>  | The source node ID. |
| <i>endId</i>  | The end node ID.    |
| <i>length</i> | Specified length.   |

##### Returns

The number of paths of length exactly length joining srcNode and endNode.

#### 9.22.4.39 getOutDeg()

```
template<typename LabelT = std::string, typename NodeIDT = unsigned int, typename EdgeT =
unsigned long long int>
std::size_t LinkPred::DNetwork< LabelT, NodeIDT, EdgeT >::getOutDeg (
    NodeID const & iid ) const [inline]
```

##### Parameters

|            |                       |
|------------|-----------------------|
| <i>iid</i> | The node internal ID. |
|------------|-----------------------|

##### Returns

The out-degree of node iid.

**9.22.4.40 getOutDegStat()**

```
template<typename LabelT = std::string, typename NodeIDT = unsigned int, typename EdgeT =
unsigned long long int>
void LinkPred::DNetwork< LabelT, NodeIDT, EdgeT >::getOutDegStat (
    std::size_t & minOutDeg,
    std::size_t & maxOutDeg,
    double & avgOutDeg ) const [inline]
```

Compute some out-degree statistics.

**Parameters**

|                  |                                        |
|------------------|----------------------------------------|
| <i>minOutDeg</i> | (output parameter) minimum out-degree. |
| <i>maxOutDeg</i> | (output parameter) maximum out-degree. |
| <i>avgOutDeg</i> | (output parameter) average out-degree. |

**9.22.4.41 inEdgesBegin()**

```
template<typename LabelT = std::string, typename NodeIDT = unsigned int, typename EdgeT =
unsigned long long int>
EdgeIt LinkPred::DNetwork< LabelT, NodeIDT, EdgeT >::inEdgesBegin ( ) const [inline]
```

**Returns**

A read-only (constant) iterator that points to the first edge (with internal ID). Edges are ordered by end node.

**9.22.4.42 inEdgesEnd()**

```
template<typename LabelT = std::string, typename NodeIDT = unsigned int, typename EdgeT =
unsigned long long int>
EdgeIt LinkPred::DNetwork< LabelT, NodeIDT, EdgeT >::inEdgesEnd ( ) const [inline]
```

**Returns**

A read-only (constant) iterator that points one past the last edge (with internal ID). Edges are ordered by end node.

**9.22.4.43 inNeighborsBegin()**

```
template<typename LabelT = std::string, typename NodeIDT = unsigned int, typename EdgeT =
unsigned long long int>
EdgeIt LinkPred::DNetwork< LabelT, NodeIDT, EdgeT >::inNeighborsBegin (
    NodeID const & iid ) const [inline]
```

**Parameters**

|            |                      |
|------------|----------------------|
| <i>iid</i> | An internal node ID. |
|------------|----------------------|

**Returns**

An iterator to the first in-neighbor of iid.

**9.22.4.44 inNeighborsEnd()**

```
template<typename LabelT = std::string, typename NodeIDT = unsigned int, typename EdgeT =
unsigned long long int>
EdgeIt LinkPred::DNetwork< LabelT, NodeIDT, EdgeT >::inNeighborsEnd (
    NodeID const & iid ) const [inline]
```

**Parameters**

|            |                      |
|------------|----------------------|
| <i>iid</i> | An internal node ID. |
|------------|----------------------|

**Returns**

An iterator to one past the last in-neighbor of iid.

**9.22.4.45 isEdge() [1/2]**

```
template<typename LabelT = std::string, typename NodeIDT = unsigned int, typename EdgeT =
unsigned long long int>
bool LinkPred::DNetwork< LabelT, NodeIDT, EdgeT >::isEdge (
    Edge const & edge ) const
```

Check if an edge exists in  $O(k_{\max})$ .

**Parameters**

|             |          |
|-------------|----------|
| <i>edge</i> | An edge. |
|-------------|----------|

**Returns**

True if edge exists in the network, false otherwise.

**9.22.4.46 isEdge()** [2/2]

```
template<typename LabelT = std::string, typename NodeIDT = unsigned int, typename EdgeT =
unsigned long long int>
bool LinkPred::DNetwork< LabelT, NodeIDT, EdgeT >::isEdge (
    NodeID const & ii,
    NodeID const & ij ) const [inline]
```

Check if an edge exists in  $O(k\_max)$ .

**Parameters**

|           |                      |
|-----------|----------------------|
| <i>ii</i> | An internal node ID. |
| <i>ij</i> | An internal node ID. |

**Returns**

true if the edge (ii, ij) exists, false otherwise.

**9.22.4.47 labelsBegin()**

```
template<typename LabelT = std::string, typename NodeIDT = unsigned int, typename EdgeT =
unsigned long long int>
LabelIt LinkPred::DNetwork< LabelT, NodeIDT, EdgeT >::labelsBegin ( ) const [inline]
```

**Returns**

A read-only (constant) external node ID iterator that points to the first node.

**9.22.4.48 labelsEnd()**

```
template<typename LabelT = std::string, typename NodeIDT = unsigned int, typename EdgeT =
unsigned long long int>
LabelIt LinkPred::DNetwork< LabelT, NodeIDT, EdgeT >::labelsEnd ( ) const [inline]
```

**Returns**

A read-only (constant) external node ID iterator that points one past the last node.

**9.22.4.49 makeEdge()**

```
template<typename LabelT = std::string, typename NodeIDT = unsigned int, typename EdgeT =
unsigned long long int>
static Edge LinkPred::DNetwork< LabelT, NodeIDT, EdgeT >::makeEdge (
    NodeID const & i,
    NodeID const & j ) [inline], [static]
```

Make an edge in internal representation out of two nodes' internal IDs.

**Parameters**

|          |                    |
|----------|--------------------|
| <i>i</i> | The starting node. |
| <i>j</i> | The end node.      |

**Returns**

The edge (i, j).

**9.22.4.50 neighbBegin()**

```
template<typename LabelT = std::string, typename NodeIDT = unsigned int, typename EdgeT =
unsigned long long int>
EdgeIt LinkPred::DNetwork< LabelT, NodeIDT, EdgeT >::neighbBegin (
    NodeID const & iid ) const [inline]
```

**Parameters**

|            |                      |
|------------|----------------------|
| <i>iid</i> | An internal node ID. |
|------------|----------------------|

**Returns**

An iterator to the first out-neighbor of iid.

**9.22.4.51 neighbEnd()**

```
template<typename LabelT = std::string, typename NodeIDT = unsigned int, typename EdgeT =
unsigned long long int>
EdgeIt LinkPred::DNetwork< LabelT, NodeIDT, EdgeT >::neighbEnd (
    NodeID const & iid ) const [inline]
```

**Parameters**

|            |                      |
|------------|----------------------|
| <i>iid</i> | An internal node ID. |
|------------|----------------------|

**Returns**

An iterator to one past the last out-neighbor of iid.

**9.22.4.52 nodesBegin()**

```
template<typename LabelT = std::string, typename NodeIDT = unsigned int, typename EdgeT =
unsigned long long int>
NodeIt LinkPred::DNetwork< LabelT, NodeIDT, EdgeT >::nodesBegin ( ) const [inline]
```

**Returns**

A read-only (constant) external node ID iterator that points to the first node.

**9.22.4.53 nodesDegBegin()**

```
template<typename LabelT = std::string, typename NodeIDT = unsigned int, typename EdgeT =
unsigned long long int>
NodeDegIt LinkPred::DNetwork< LabelT, NodeIDT, EdgeT >::nodesDegBegin ( ) const [inline]
```

**Returns**

A read-only (constant) external node ID iterator that points to the first node-degree couple.

**9.22.4.54 nodesDegEnd()**

```
template<typename LabelT = std::string, typename NodeIDT = unsigned int, typename EdgeT =
unsigned long long int>
NodeDegIt LinkPred::DNetwork< LabelT, NodeIDT, EdgeT >::nodesDegEnd ( ) const [inline]
```

**Returns**

A read-only (constant) external node ID iterator that points one past the last node-degree couple.

**9.22.4.55 nodesEnd()**

```
template<typename LabelT = std::string, typename NodeIDT = unsigned int, typename EdgeT =
unsigned long long int>
NodeIt LinkPred::DNetwork< LabelT, NodeIDT, EdgeT >::nodesEnd ( ) const [inline]
```

**Returns**

A read-only (constant) external node ID iterator that points one past the last node.

**9.22.4.56 nonEdgesBegin()**

```
template<typename LabelT = std::string, typename NodeIDT = unsigned int, typename EdgeT =
unsigned long long int>
NonEdgeIt LinkPred::DNetwork< LabelT, NodeIDT, EdgeT >::nonEdgesBegin ( ) const [inline]
```

**Returns**

A read-only (constant) iterator that points to the first non-edge (with internal ID).

**9.22.4.57 nonEdgesEnd()**

```
template<typename LabelT = std::string, typename NodeIDT = unsigned int, typename EdgeT =
unsigned long long int>
NonEdgeIt LinkPred::DNetwork< LabelT, NodeIDT, EdgeT >::nonEdgesEnd ( ) const [inline]
```

**Returns**

A read-only (constant) iterator that points one past the last non-edge (with internal ID).

**9.22.4.58 operator=() [1/2]**

```
template<typename LabelT = std::string, typename NodeIDT = unsigned int, typename EdgeT =
unsigned long long int>
DNetwork& LinkPred::DNetwork< LabelT, NodeIDT, EdgeT >::operator= (
    DNetwork< LabelT, NodeIDT, EdgeT > && that ) [default]
```

Move assignment operator.

**Parameters**

|             |                     |
|-------------|---------------------|
| <i>that</i> | The object to move. |
|-------------|---------------------|

**9.22.4.59 operator=() [2/2]**

```
template<typename LabelT = std::string, typename NodeIDT = unsigned int, typename EdgeT =
unsigned long long int>
DNetwork& LinkPred::DNetwork< LabelT, NodeIDT, EdgeT >::operator= (
    DNetwork< LabelT, NodeIDT, EdgeT > const & that ) [default]
```

Copy assignment operator.

**Parameters**

|             |                     |
|-------------|---------------------|
| <i>that</i> | The object to copy. |
|-------------|---------------------|

**9.22.4.60 outEdgesBegin()**

```
template<typename LabelT = std::string, typename NodeIDT = unsigned int, typename EdgeT =
unsigned long long int>
EdgeIt LinkPred::DNetwork< LabelT, NodeIDT, EdgeT >::outEdgesBegin ( ) const [inline]
```



**Returns**

A read-only (constant) iterator that points to the first edge (with internal ID). Edges are ordered by source node.

**9.22.4.61 outEdgesEnd()**

```
template<typename LabelT = std::string, typename NodeIDT = unsigned int, typename EdgeT =
unsigned long long int>
EdgeIt LinkPred::DNetwork< LabelT, NodeIDT, EdgeT >::outEdgesEnd ( ) const [inline]
```

**Returns**

A read-only (constant) iterator that points one past the last edge (with internal ID). Edges are ordered by source node.

**9.22.4.62 outNeighborsBegin()**

```
template<typename LabelT = std::string, typename NodeIDT = unsigned int, typename EdgeT =
unsigned long long int>
EdgeIt LinkPred::DNetwork< LabelT, NodeIDT, EdgeT >::outNeighborsBegin (
    NodeID const & iid ) const [inline]
```

**Parameters**

|            |                      |
|------------|----------------------|
| <i>iid</i> | An internal node ID. |
|------------|----------------------|

**Returns**

An iterator to the first out-neighbor of iid.

**9.22.4.63 outNeighborsEnd()**

```
template<typename LabelT = std::string, typename NodeIDT = unsigned int, typename EdgeT =
unsigned long long int>
EdgeIt LinkPred::DNetwork< LabelT, NodeIDT, EdgeT >::outNeighborsEnd (
    NodeID const & iid ) const [inline]
```

**Parameters**

|            |                      |
|------------|----------------------|
| <i>iid</i> | An internal node ID. |
|------------|----------------------|

**Returns**

An iterator to one past the last out-neighbor of iid.

**9.22.4.64 print()**

```
template<typename LabelT = std::string, typename NodeIDT = unsigned int, typename EdgeT =
unsigned long long int>
void LinkPred::DNetwork< LabelT, NodeIDT, EdgeT >::print ( ) const
```

Print edges to std::cout.

**9.22.4.65 printEdges()**

```
template<typename LabelT = std::string, typename NodeIDT = unsigned int, typename EdgeT =
unsigned long long int>
template<typename ForwardIterator >
void LinkPred::DNetwork< LabelT, NodeIDT, EdgeT >::printEdges (
    ForwardIterator edgesBegin,
    ForwardIterator edgesEnd ) const [inline]
```

Print edges to std::cout.

**Parameters**

|                   |                                                |
|-------------------|------------------------------------------------|
| <i>edgesBegin</i> | Iterator to the beginning of the edges.        |
| <i>edgesEnd</i>   | Iterator to one past the the end of the edges. |

**9.22.4.66 read()**

```
template<typename LabelT = std::string, typename NodeIDT = unsigned int, typename EdgeT =
unsigned long long int>
static std::shared_ptr<DNetwork<Label, NodeID, Edge> > LinkPred::DNetwork< LabelT, NodeIDT,
EdgeT >::read (
    std::string fileName,
    bool ignoreRepetitions = false,
    bool ignoreLoops = false ) [static]
```

Read network from file.

**Parameters**

|                          |                                   |
|--------------------------|-----------------------------------|
| <i>fileName</i>          | The file name.                    |
| <i>ignoreRepetitions</i> | Whether to ignore repeated edges. |
| <i>ignoreLoops</i>       | Whether to ignore loops.          |

**Returns**

The read network.

**9.22.4.67 readEdges()**

```
template<typename LabelT = std::string, typename NodeIDT = unsigned int, typename EdgeT =
unsigned long long int>
std::shared_ptr<std::vector<Edge> > LinkPred::DNetwork< LabelT, NodeIDT, EdgeT >::readEdges
(
    std::string fileName ) const
```

Read couples from file.

**Parameters**

|                 |                |
|-----------------|----------------|
| <i>fileName</i> | The file name. |
|-----------------|----------------|

**Returns**

The edges.

**9.22.4.68 reverseEdge()**

```
template<typename LabelT = std::string, typename NodeIDT = unsigned int, typename EdgeT =
unsigned long long int>
static Edge LinkPred::DNetwork< LabelT, NodeIDT, EdgeT >::reverseEdge (
    Edge const & e ) [inline], [static]
```

**Parameters**

|          |                |
|----------|----------------|
| <i>e</i> | An edge (i,j). |
|----------|----------------|

**Returns**

The edge (j, i).

**9.22.4.69 rndEdgesBegin()**

```
template<typename LabelT = std::string, typename NodeIDT = unsigned int, typename EdgeT =
unsigned long long int>
RndEdgeIt LinkPred::DNetwork< LabelT, NodeIDT, EdgeT >::rndEdgesBegin (
    double ratio,
    long int seed ) const [inline]
```

**Parameters**

|              |                                    |
|--------------|------------------------------------|
| <i>ratio</i> | Ratio of edges that are selected.  |
| <i>seed</i>  | The random number gnerator's seed. |

**Returns**

a read-only (constant) randomized iterator that points to the first edge (with internal ID).

**9.22.4.70 rndEdgesEnd()**

```
template<typename LabelT = std::string, typename NodeIDT = unsigned int, typename EdgeT =
unsigned long long int>
RndEdgeIt LinkPred::DNetwork< LabelT, NodeIDT, EdgeT >::rndEdgesEnd ( ) const [inline]
```

**Returns**

A read-only (constant) randomized iterator that points one past the last edge (with internal ID).

**9.22.4.71 rndNodesBegin()**

```
template<typename LabelT = std::string, typename NodeIDT = unsigned int, typename EdgeT =
unsigned long long int>
RndNodeIt LinkPred::DNetwork< LabelT, NodeIDT, EdgeT >::rndNodesBegin (
    double ratio,
    long int seed ) const [inline]
```

**Parameters**

|              |                                    |
|--------------|------------------------------------|
| <i>ratio</i> | Ratio of nodes that are selected.  |
| <i>seed</i>  | The random number gnerator's seed. |

**Returns**

a read-only (constant) randomized iterator that points to the first node (with internal ID).

**9.22.4.72 rndNodesEnd()**

```
template<typename LabelT = std::string, typename NodeIDT = unsigned int, typename EdgeT =
unsigned long long int>
RndNodeIt LinkPred::DNetwork< LabelT, NodeIDT, EdgeT >::rndNodesEnd ( ) const [inline]
```

**Returns**

A read-only (constant) randomized iterator that points one past the last node (with internal ID).

**9.22.4.73 rndNonEdgesBegin()**

```
template<typename LabelT = std::string, typename NodeIDT = unsigned int, typename EdgeT =
unsigned long long int>
RndNonEdgeIt LinkPred::DNetwork< LabelT, NodeIDT, EdgeT >::rndNonEdgesBegin (
    double ratio,
    long int seed ) const [inline]
```

**Parameters**

|              |                                      |
|--------------|--------------------------------------|
| <i>ratio</i> | Ratio of nonedges that are selected. |
| <i>seed</i>  | The random number gnerator's seed.   |

**Returns**

a read-only (constant) randomized iterator that points to the first non-edge (with internal ID).

**9.22.4.74 rndNonEdgesEnd()**

```
template<typename LabelT = std::string, typename NodeIDT = unsigned int, typename EdgeT =
unsigned long long int>
RndNonEdgeIt LinkPred::DNetwork< LabelT, NodeIDT, EdgeT >::rndNonEdgesEnd ( ) const [inline]
```

**Returns**

A read-only (constant) randomized iterator that points one past the last non-edge (with internal ID).

**9.22.4.75 shuffle()**

```
template<typename LabelT = std::string, typename NodeIDT = unsigned int, typename EdgeT =
unsigned long long int>
void LinkPred::DNetwork< LabelT, NodeIDT, EdgeT >::shuffle (
    long int seed )
```

Shuffles the nodes' internal IDs. This is useful to eliminate bias in methods that depend on node/edge order. Upon calling this method, all iterators and maps associated with the network are invalidated.

## Parameters

|             |                                 |
|-------------|---------------------------------|
| <i>seed</i> | Random number generator's seed. |
|-------------|---------------------------------|

**9.22.4.76 start()**

```
template<typename LabelT = std::string, typename NodeIDT = unsigned int, typename EdgeT =
unsigned long long int>
static const NodeID LinkPred::DNetwork< LabelT, NodeIDT, EdgeT >::start (
    Edge const & edge ) [inline], [static]
```

## Parameters

|             |          |
|-------------|----------|
| <i>edge</i> | An edge. |
|-------------|----------|

## Returns

The starting node of edge.

**9.22.4.77 write()**

```
template<typename LabelT = std::string, typename NodeIDT = unsigned int, typename EdgeT =
unsigned long long int>
void LinkPred::DNetwork< LabelT, NodeIDT, EdgeT >::write (
    std::string fileName ) const
```

Write adjacency matrix in sparse form to file.

## Parameters

|                 |                |
|-----------------|----------------|
| <i>fileName</i> | the file name. |
|-----------------|----------------|

The documentation for this class was generated from the following file:

- [include/linkpred/core/dnetwork/dnetwork.hpp](#)

**9.23 LinkPred::DotProd Class Reference**

A simple dot product similarity measure.

```
#include <dotprod.hpp>
```

Inheritance diagram for LinkPred::DotProd:

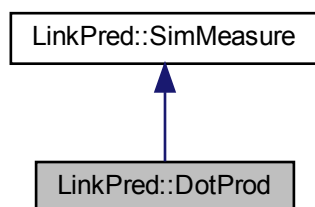

Collaboration diagram for LinkPred::DotProd:

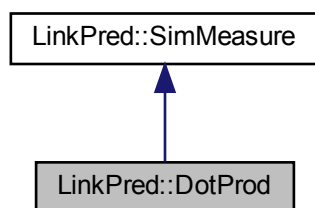

## Public Member Functions

- [DotProd](#) ()
- [DotProd](#) ([DotProd](#) const &that)=default
- [DotProd](#) & [operator=](#) ([DotProd](#) const &that)=default
- [DotProd](#) ([DotProd](#) &&that)=default
- [DotProd](#) & [operator=](#) ([DotProd](#) &&that)=default
- virtual double [sim](#) ([Vec](#) const &v1, [Vec](#) const &v2)
- virtual [~DotProd](#) ()=default

### 9.23.1 Detailed Description

A simple dot product similarity measure.

### 9.23.2 Constructor & Destructor Documentation

### 9.23.2.1 DotProd() [1/3]

```
LinkPred::DotProd::DotProd ( ) [inline]
```

Constructor.

### 9.23.2.2 DotProd() [2/3]

```
LinkPred::DotProd::DotProd (
    DotProd const & that ) [default]
```

Copy constructor.

#### Parameters

|             |                     |
|-------------|---------------------|
| <i>that</i> | The object to copy. |
|-------------|---------------------|

### 9.23.2.3 DotProd() [3/3]

```
LinkPred::DotProd::DotProd (
    DotProd && that ) [default]
```

Move constructor.

#### Parameters

|             |                     |
|-------------|---------------------|
| <i>that</i> | The object to move. |
|-------------|---------------------|

### 9.23.2.4 ~DotProd()

```
virtual LinkPred::DotProd::~~DotProd ( ) [virtual], [default]
```

Destructor.

## 9.23.3 Member Function Documentation

### 9.23.3.1 operator=() [1/2]

```
DotProd& LinkPred::DotProd::operator= (
    DotProd && that ) [default]
```

Move assignment operator.



## Parameters

|             |                     |
|-------------|---------------------|
| <i>that</i> | The object to move. |
|-------------|---------------------|

## 9.23.3.2 operator=() [2/2]

```
DotProd& LinkPred::DotProd::operator= (
    DotProd const & that ) [default]
```

Copy assignment operator.

## Parameters

|             |                     |
|-------------|---------------------|
| <i>that</i> | The object to copy. |
|-------------|---------------------|

## 9.23.3.3 sim()

```
virtual double LinkPred::DotProd::sim (
    Vec const & v1,
    Vec const & v2 ) [virtual]
```

Compute the similarity between two vectors.

## Parameters

|           |                                                     |
|-----------|-----------------------------------------------------|
| <i>v1</i> | First vector.                                       |
| <i>v2</i> | Second vector. Must be of the same dimension as v1. |

## Returns

The similarity between v1 and v2.

Implements [LinkPred::SimMeasure](#).

The documentation for this class was generated from the following file:

- [include/linkpred/ml/simmeasures/dotprod.hpp](#)

## 9.24 LinkPred::DPATPredictor< Network, EdgeRndIt, ScoreRndIt, EdgeRndOutIt > Class Template Reference

Common neighbor link predictor adapted to directed networks.

```
#include <dpatpredictor.hpp>
```

Inheritance diagram for LinkPred::DPATPredictor< Network, EdgeRndIt, ScoreRndIt, EdgeRndOutIt >:

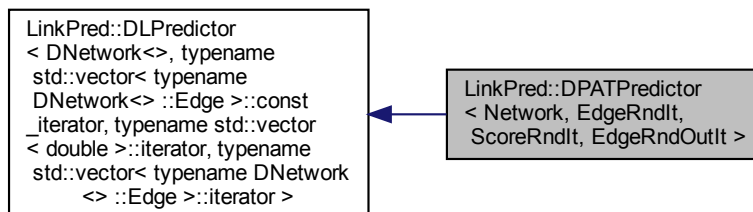

Collaboration diagram for LinkPred::DPATPredictor< Network, EdgeRndIt, ScoreRndIt, EdgeRndOutIt >:

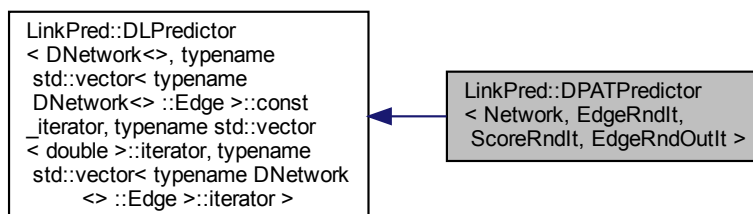

## Public Member Functions

- [DPATPredictor](#) (std::shared\_ptr< [Network](#) const > net)
- [DPATPredictor](#) ([DPATPredictor](#) const &that)=default
- [DPATPredictor](#) & [operator=](#) ([DPATPredictor](#) const &that)=default
- [DPATPredictor](#) ([DPATPredictor](#) &&that)=default
- [DPATPredictor](#) & [operator=](#) ([DPATPredictor](#) &&that)=default
- virtual void [init](#) ()
- virtual void [learn](#) ()
- virtual void [predict](#) ([EdgeRndIt](#) begin, [EdgeRndIt](#) end, [ScoreRndIt](#) scores)
- virtual double [score](#) ([Edge](#) const &e)
- virtual [~DPATPredictor](#) ()=default

## Additional Inherited Members

### 9.24.1 Detailed Description

```
template<typename Network = DNetwork<>, typename EdgeRndIt = typename std::vector<typename Network::Edge>::const_iterator,
typename ScoreRndIt = typename std::vector<double>::iterator, typename EdgeRndOutIt = typename std::vector<typename Network::Edge>::iterator>
class LinkPred::DPATPredictor< Network, EdgeRndIt, ScoreRndIt, EdgeRndOutIt >
```

Common neighbor link predictor adapted to directed networks.

## Template Parameters

|                         |                                                   |
|-------------------------|---------------------------------------------------|
| <i>Network</i>          | The network type.                                 |
| <i>Edge↔<br/>RndIt</i>  | A random iterator type used to iterate on edges.  |
| <i>Score↔<br/>RndIt</i> | A random iterator type used to iterate on scores. |

## 9.24.2 Constructor &amp; Destructor Documentation

## 9.24.2.1 DPATPredictor() [1/3]

```
template<typename Network = DNetwork<>, typename EdgeRndIt = typename std::vector<typename
Network::Edge>::const_iterator, typename ScoreRndIt = typename std::vector<double>::iterator,
typename EdgeRndOutIt = typename std::vector<typename Network::Edge>::iterator>
LinkPred::DPATPredictor< Network, EdgeRndIt, ScoreRndIt, EdgeRndOutIt >::DPATPredictor (
    std::shared_ptr< Network const > net ) [inline]
```

## Parameters

|            |              |
|------------|--------------|
| <i>net</i> | The network. |
|------------|--------------|

## 9.24.2.2 DPATPredictor() [2/3]

```
template<typename Network = DNetwork<>, typename EdgeRndIt = typename std::vector<typename
Network::Edge>::const_iterator, typename ScoreRndIt = typename std::vector<double>::iterator,
typename EdgeRndOutIt = typename std::vector<typename Network::Edge>::iterator>
LinkPred::DPATPredictor< Network, EdgeRndIt, ScoreRndIt, EdgeRndOutIt >::DPATPredictor (
    DPATPredictor< Network, EdgeRndIt, ScoreRndIt, EdgeRndOutIt > const & that )
[default]
```

Copy constructor.

## Parameters

|             |                     |
|-------------|---------------------|
| <i>that</i> | The object to copy. |
|-------------|---------------------|

## 9.24.2.3 DPATPredictor() [3/3]

```
template<typename Network = DNetwork<>, typename EdgeRndIt = typename std::vector<typename
Network::Edge>::const_iterator, typename ScoreRndIt = typename std::vector<double>::iterator,
```

```

typename EdgeRndOutIt = typename std::vector<typename Network::Edge>::iterator>
LinkPred::DPATPredictor< Network, EdgeRndIt, ScoreRndIt, EdgeRndOutIt >::DPATPredictor (
    DPATPredictor< Network, EdgeRndIt, ScoreRndIt, EdgeRndOutIt > && that ) [default]

```

Move constructor.

#### Parameters

|             |                     |
|-------------|---------------------|
| <i>that</i> | The object to move. |
|-------------|---------------------|

### 9.24.2.4 ~DPATPredictor()

```

template<typename Network = DNetwork<>, typename EdgeRndIt = typename std::vector<typename
Network::Edge>::const_iterator, typename ScoreRndIt = typename std::vector<double>::iterator,
typename EdgeRndOutIt = typename std::vector<typename Network::Edge>::iterator>
virtual LinkPred::DPATPredictor< Network, EdgeRndIt, ScoreRndIt, EdgeRndOutIt >::~~DPATPredictor
( ) [virtual], [default]

```

Finds the k negative edges with the top score. Ties are broken randomly.

#### Parameters

|            |                                                                                                         |
|------------|---------------------------------------------------------------------------------------------------------|
| <i>k</i>   | The number of edges to find.                                                                            |
| <i>eit</i> | An output iterator where the edges are written.                                                         |
| <i>sit</i> | An output iterator where the scores are written. The scores are written in the same order as the edges. |

#### Returns

The number of negative edges inserted. It is the minimum between k and the number of negative edges in the network. Destructor.

## 9.24.3 Member Function Documentation

### 9.24.3.1 init()

```

template<typename Network = DNetwork<>, typename EdgeRndIt = typename std::vector<typename
Network::Edge>::const_iterator, typename ScoreRndIt = typename std::vector<double>::iterator,
typename EdgeRndOutIt = typename std::vector<typename Network::Edge>::iterator>
virtual void LinkPred::DPATPredictor< Network, EdgeRndIt, ScoreRndIt, EdgeRndOutIt >::init ( )
[inline], [virtual]

```

Initialize the solver.

Implements `LinkPred::DLPredictor< DNetwork<>, typename std::vector< typename DNetwork<> ::Edge >::const_iterator, typen`

### 9.24.3.2 learn()

```
template<typename Network = DNetwork<>, typename EdgeRndIt = typename std::vector<typename
Network::Edge>::const_iterator, typename ScoreRndIt = typename std::vector<double>::iterator,
typename EdgeRndOutIt = typename std::vector<typename Network::Edge>::iterator>
virtual void LinkPred::DPATPredictor< Network, EdgeRndIt, ScoreRndIt, EdgeRndOutIt >::learn (
) [inline], [virtual]
```

Learn.

Implements [LinkPred::DLPredictor< DNetwork<>, typename std::vector< typename DNetwork<> ::Edge >::const\\_iterator, typen](#)

### 9.24.3.3 operator=() [1/2]

```
template<typename Network = DNetwork<>, typename EdgeRndIt = typename std::vector<typename
Network::Edge>::const_iterator, typename ScoreRndIt = typename std::vector<double>::iterator,
typename EdgeRndOutIt = typename std::vector<typename Network::Edge>::iterator>
DPATPredictor& LinkPred::DPATPredictor< Network, EdgeRndIt, ScoreRndIt, EdgeRndOutIt >::operator=
(
    DPATPredictor< Network, EdgeRndIt, ScoreRndIt, EdgeRndOutIt > && that ) [default]
```

Move assignment operator.

#### Parameters

|             |                     |
|-------------|---------------------|
| <i>that</i> | The object to move. |
|-------------|---------------------|

### 9.24.3.4 operator=() [2/2]

```
template<typename Network = DNetwork<>, typename EdgeRndIt = typename std::vector<typename
Network::Edge>::const_iterator, typename ScoreRndIt = typename std::vector<double>::iterator,
typename EdgeRndOutIt = typename std::vector<typename Network::Edge>::iterator>
DPATPredictor& LinkPred::DPATPredictor< Network, EdgeRndIt, ScoreRndIt, EdgeRndOutIt >::operator=
(
    DPATPredictor< Network, EdgeRndIt, ScoreRndIt, EdgeRndOutIt > const & that )
[default]
```

Copy assignment operator.

#### Parameters

|             |                     |
|-------------|---------------------|
| <i>that</i> | The object to copy. |
|-------------|---------------------|

### 9.24.3.5 predict()

```
template<typename Network = DNetwork<>, typename EdgeRndIt = typename std::vector<typename
Network::Edge>::const_iterator, typename ScoreRndIt = typename std::vector<double>::iterator,
typename EdgeRndOutIt = typename std::vector<typename Network::Edge>::iterator>
virtual void LinkPred::DPATPredictor< Network, EdgeRndIt, ScoreRndIt, EdgeRndOutIt >::predict
(
    EdgeRndIt begin,
    EdgeRndIt end,
    ScoreRndIt scores ) [virtual]
```

Predict the links.

#### Parameters

|               |                                         |
|---------------|-----------------------------------------|
| <i>begin</i>  | Beginning of the links to be predicted. |
| <i>end</i>    | end of the links to be predicted.       |
| <i>scores</i> | Beginning of scores.                    |

Reimplemented from [LinkPred::DLPredictor< DNetwork<>, typename std::vector< typename DNetwork<> ::Edge >::const\\_iterator](#)

### 9.24.3.6 score()

```
template<typename Network = DNetwork<>, typename EdgeRndIt = typename std::vector<typename
Network::Edge>::const_iterator, typename ScoreRndIt = typename std::vector<double>::iterator,
typename EdgeRndOutIt = typename std::vector<typename Network::Edge>::iterator>
virtual double LinkPred::DPATPredictor< Network, EdgeRndIt, ScoreRndIt, EdgeRndOutIt >::score
(
    Edge const & e ) [virtual]
```

Compute the score of a single edge.

#### Parameters

|          |           |
|----------|-----------|
| <i>e</i> | The edge. |
|----------|-----------|

#### Returns

The score of e.

The documentation for this class was generated from the following file:

- include/linkpred/predictors/directed/[dpatpredictor.hpp](#)

## 9.25 LinkPred::DPSTPredictor< Network, EdgeRndIt, ScoreRndIt, EdgeRndOutIt > Class Template Reference

A link predictor that prestores edge scores. This allows to seemingly integrate results from external link prediction algorithms to [LinkPred](#) (for example, users may implement their own link prediction algorithm and then use this link predictor to use compare their results to algorithms available in [LinkPred](#)).

```
#include <dpstp predictor.hpp>
```

Inheritance diagram for LinkPred::DPSTPredictor< Network, EdgeRndIt, ScoreRndIt, EdgeRndOutIt >:

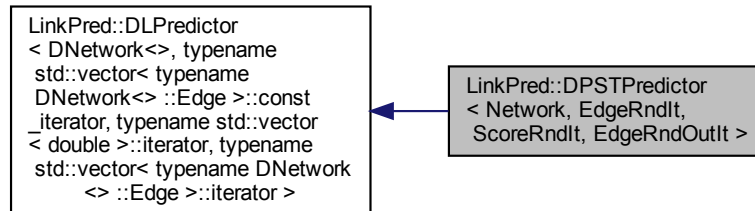

Collaboration diagram for LinkPred::DPSTPredictor< Network, EdgeRndIt, ScoreRndIt, EdgeRndOutIt >:

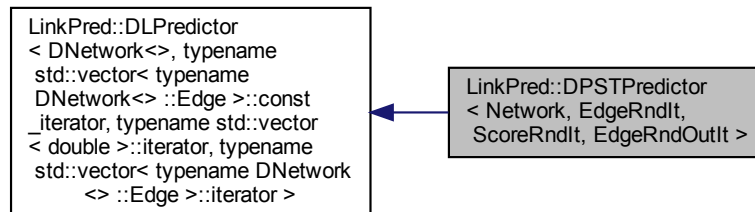

## Public Member Functions

- [DPSTPredictor](#) (std::shared\_ptr< [Network](#) const > net)
- [DPSTPredictor](#) ([DPSTPredictor](#) const &that)=default
- [DPSTPredictor](#) & [operator=](#) ([DPSTPredictor](#) const &that)=default
- [DPSTPredictor](#) ([DPSTPredictor](#) &&that)=default
- [DPSTPredictor](#) & [operator=](#) ([DPSTPredictor](#) &&that)=default
- void [setEdgeScores](#) (typename [Network](#)::template [EdgeMapSP](#)< double > edgeScores)
- void [loadEdgeScores](#) (std::string fileName)
- virtual void [init](#) ()
- virtual void [learn](#) ()
- virtual double [score](#) ([Edge](#) const &e)
- virtual [~DPSTPredictor](#) ()=default

## Additional Inherited Members

### 9.25.1 Detailed Description

```
template<typename Network = DNetwork<>, typename EdgeRndIt = typename std::vector<typename Network::Edge>::const_iterator,
typename ScoreRndIt = typename std::vector<double>::iterator, typename EdgeRndOutIt = typename std::vector<typename Network::Edge>::iterator>
class LinkPred::DPSTPredictor< Network, EdgeRndIt, ScoreRndIt, EdgeRndOutIt >
```

A link predictor that prestores edge scores. This allows to seemingly integrate results from external link prediction algorithms to [LinkPred](#) (for example, users may implement their own link prediction algorithm and then use this link predictor to use compare their results to algorithms available in [LinkPred](#)).

#### Template Parameters

|                   |                                                   |
|-------------------|---------------------------------------------------|
| <i>Network</i>    | The network type.                                 |
| <i>EdgeRndIt</i>  | A random iterator type used to iterate on edges.  |
| <i>ScoreRndIt</i> | A random iterator type used to iterate on scores. |

### 9.25.2 Constructor & Destructor Documentation

#### 9.25.2.1 DPSTPredictor() [1/3]

```
template<typename Network = DNetwork<>, typename EdgeRndIt = typename std::vector<typename
Network::Edge>::const_iterator, typename ScoreRndIt = typename std::vector<double>::iterator,
typename EdgeRndOutIt = typename std::vector<typename Network::Edge>::iterator>
LinkPred::DPSTPredictor< Network, EdgeRndIt, ScoreRndIt, EdgeRndOutIt >::DPSTPredictor (
    std::shared_ptr< Network const > net ) [inline]
```

#### Parameters

|            |              |
|------------|--------------|
| <i>net</i> | The network. |
|------------|--------------|

#### 9.25.2.2 DPSTPredictor() [2/3]

```
template<typename Network = DNetwork<>, typename EdgeRndIt = typename std::vector<typename
Network::Edge>::const_iterator, typename ScoreRndIt = typename std::vector<double>::iterator,
typename EdgeRndOutIt = typename std::vector<typename Network::Edge>::iterator>
LinkPred::DPSTPredictor< Network, EdgeRndIt, ScoreRndIt, EdgeRndOutIt >::DPSTPredictor (
    DPSTPredictor< Network, EdgeRndIt, ScoreRndIt, EdgeRndOutIt > const & that )
[default]
```

Copy constructor.



## Parameters

|             |                     |
|-------------|---------------------|
| <i>that</i> | The object to copy. |
|-------------|---------------------|

## 9.25.2.3 DPSTPredictor() [3/3]

```
template<typename Network = DNetwork<>, typename EdgeRndIt = typename std::vector<typename
Network::Edge>::const_iterator, typename ScoreRndIt = typename std::vector<double>::iterator,
typename EdgeRndOutIt = typename std::vector<typename Network::Edge>::iterator>
LinkPred::DPSTPredictor< Network, EdgeRndIt, ScoreRndIt, EdgeRndOutIt >::DPSTPredictor (
    DPSTPredictor< Network, EdgeRndIt, ScoreRndIt, EdgeRndOutIt > && that ) [default]
```

Move constructor.

## Parameters

|             |                     |
|-------------|---------------------|
| <i>that</i> | The object to move. |
|-------------|---------------------|

## 9.25.2.4 ~DPSTPredictor()

```
template<typename Network = DNetwork<>, typename EdgeRndIt = typename std::vector<typename
Network::Edge>::const_iterator, typename ScoreRndIt = typename std::vector<double>::iterator,
typename EdgeRndOutIt = typename std::vector<typename Network::Edge>::iterator>
virtual LinkPred::DPSTPredictor< Network, EdgeRndIt, ScoreRndIt, EdgeRndOutIt >::~~DPSTPredictor
( ) [virtual], [default]
```

Destructor.

## 9.25.3 Member Function Documentation

## 9.25.3.1 init()

```
template<typename Network = DNetwork<>, typename EdgeRndIt = typename std::vector<typename
Network::Edge>::const_iterator, typename ScoreRndIt = typename std::vector<double>::iterator,
typename EdgeRndOutIt = typename std::vector<typename Network::Edge>::iterator>
virtual void LinkPred::DPSTPredictor< Network, EdgeRndIt, ScoreRndIt, EdgeRndOutIt >::init ( )
[inline], [virtual]
```

Initialize the solver.

Implements [LinkPred::DLPredictor< DNetwork<>, typename std::vector< typename DNetwork<> ::Edge >::const\\_iterator, typena](#)

### 9.25.3.2 learn()

```
template<typename Network = DNetwork<>, typename EdgeRndIt = typename std::vector<typename
Network::Edge>::const_iterator, typename ScoreRndIt = typename std::vector<double>::iterator,
typename EdgeRndOutIt = typename std::vector<typename Network::Edge>::iterator>
virtual void LinkPred::DPSTPredictor< Network, EdgeRndIt, ScoreRndIt, EdgeRndOutIt >::learn (
) [inline], [virtual]
```

Learn.

Implements [LinkPred::DLPredictor< DNetwork<>, typename std::vector< typename DNetwork<> ::Edge >::const\\_iterator, typen](#)

### 9.25.3.3 loadEdgeScores()

```
template<typename Network = DNetwork<>, typename EdgeRndIt = typename std::vector<typename
Network::Edge>::const_iterator, typename ScoreRndIt = typename std::vector<double>::iterator,
typename EdgeRndOutIt = typename std::vector<typename Network::Edge>::iterator>
void LinkPred::DPSTPredictor< Network, EdgeRndIt, ScoreRndIt, EdgeRndOutIt >::loadEdgeScores (
    std::string fileName )
```

Load edge scores from file. This file should contain the scores of all non-exisitng links of net.

#### Parameters

|                 |                                                                                                                                                                                                                                                                                                                                                                                                                                           |
|-----------------|-------------------------------------------------------------------------------------------------------------------------------------------------------------------------------------------------------------------------------------------------------------------------------------------------------------------------------------------------------------------------------------------------------------------------------------------|
| <i>fileName</i> | The name of the file containing edge scores. This should be a text file in which each line contains three columns separate by a space character (one or multiple spaces or tabs). The first two columns contain the the labels (not the internal IDs) of two nodes composing the edge. The third column contains the score. For example: A B 0.35 or: 5 8 2.6 All node labels that appear in this file must already exist in the network. |
|-----------------|-------------------------------------------------------------------------------------------------------------------------------------------------------------------------------------------------------------------------------------------------------------------------------------------------------------------------------------------------------------------------------------------------------------------------------------------|

### 9.25.3.4 operator=() [1/2]

```
template<typename Network = DNetwork<>, typename EdgeRndIt = typename std::vector<typename
Network::Edge>::const_iterator, typename ScoreRndIt = typename std::vector<double>::iterator,
typename EdgeRndOutIt = typename std::vector<typename Network::Edge>::iterator>
DPSTPredictor& LinkPred::DPSTPredictor< Network, EdgeRndIt, ScoreRndIt, EdgeRndOutIt >::operator=
(
    DPSTPredictor< Network, EdgeRndIt, ScoreRndIt, EdgeRndOutIt > && that ) [default]
```

Move assignment operator.

#### Parameters

|             |                     |
|-------------|---------------------|
| <i>that</i> | The object to move. |
|-------------|---------------------|

## 9.25.3.5 operator=() [2/2]

```
template<typename Network = DNetwork<>, typename EdgeRndIt = typename std::vector<typename
Network::Edge>::const_iterator, typename ScoreRndIt = typename std::vector<double>::iterator,
typename EdgeRndOutIt = typename std::vector<typename Network::Edge>::iterator>
DPSTPredictor& LinkPred::DPSTPredictor< Network, EdgeRndIt, ScoreRndIt, EdgeRndOutIt >::operator=
(
    DPSTPredictor< Network, EdgeRndIt, ScoreRndIt, EdgeRndOutIt > const & that )
[default]
```

Copy assignment operator.

## Parameters

|             |                     |
|-------------|---------------------|
| <i>that</i> | The object to copy. |
|-------------|---------------------|

## 9.25.3.6 score()

```
template<typename Network = DNetwork<>, typename EdgeRndIt = typename std::vector<typename
Network::Edge>::const_iterator, typename ScoreRndIt = typename std::vector<double>::iterator,
typename EdgeRndOutIt = typename std::vector<typename Network::Edge>::iterator>
virtual double LinkPred::DPSTPredictor< Network, EdgeRndIt, ScoreRndIt, EdgeRndOutIt >::score
(
    Edge const & e ) [virtual]
```

Compute the score of a single edge.

## Parameters

|          |           |
|----------|-----------|
| <i>e</i> | The edge. |
|----------|-----------|

## Returns

The score of e.

## 9.25.3.7 setEdgeScores()

```
template<typename Network = DNetwork<>, typename EdgeRndIt = typename std::vector<typename
Network::Edge>::const_iterator, typename ScoreRndIt = typename std::vector<double>::iterator,
typename EdgeRndOutIt = typename std::vector<typename Network::Edge>::iterator>
void LinkPred::DPSTPredictor< Network, EdgeRndIt, ScoreRndIt, EdgeRndOutIt >::setEdgeScores (
    typename Network::template EdgeMapSP< double > edgeScores ) [inline]
```

Set the edge scores. This should contain the scores of all non-existing links of net.

## Parameters

|                   |                                                           |
|-------------------|-----------------------------------------------------------|
| <i>edgeScores</i> | A map containing the scores of non-existing links of net. |
|-------------------|-----------------------------------------------------------|

The documentation for this class was generated from the following file:

- [include/linkpred/predictors/directed/dpstpredictor.hpp](#)

## 9.26 LinkPred::DSAPredictor< Network, EdgeRndIt, ScoreRndIt, EdgeRndOutIt > Class Template Reference

Common neighbor link predictor adapted to directed networks.

```
#include <dsaipredictor.hpp>
```

Inheritance diagram for LinkPred::DSAPredictor< Network, EdgeRndIt, ScoreRndIt, EdgeRndOutIt >:

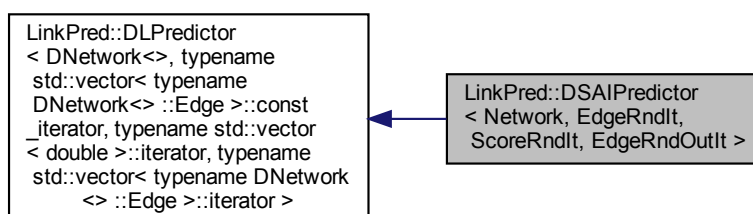

Collaboration diagram for LinkPred::DSAPredictor< Network, EdgeRndIt, ScoreRndIt, EdgeRndOutIt >:

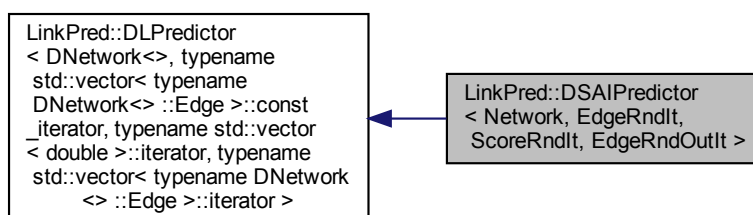

## Public Member Functions

- [DSAPredictor](#) (std::shared\_ptr< [Network](#) const > net)
- [DSAPredictor](#) ([DSAPredictor](#) const &that)=default
- [DSAPredictor](#) & operator= ([DSAPredictor](#) const &that)=default
- [DSAPredictor](#) ([DSAPredictor](#) &&that)=default
- [DSAPredictor](#) & operator= ([DSAPredictor](#) &&that)=default
- virtual void [init](#) ()
- virtual void [learn](#) ()
- virtual void [predict](#) ([EdgeRndIt](#) begin, [EdgeRndIt](#) end, [ScoreRndIt](#) scores)
- virtual double [score](#) ([Edge](#) const &e)
- virtual std::size\_t [top](#) (std::size\_t k, [EdgeRndOutIt](#) eit, [ScoreRndIt](#) sit)
- virtual [~DSAPredictor](#) ()=default

## Additional Inherited Members

### 9.26.1 Detailed Description

```
template<typename Network = DNetwork<>, typename EdgeRndIt = typename std::vector<typename Network::Edge>::const_iterator,
typename ScoreRndIt = typename std::vector<double>::iterator, typename EdgeRndOutIt = typename std::vector<typename Network::Edge>::iterator>
class LinkPred::DSAPredictor< Network, EdgeRndIt, ScoreRndIt, EdgeRndOutIt >
```

Common neighbor link predictor adapted to directed networks.

#### Template Parameters

|                                           |                                                   |
|-------------------------------------------|---------------------------------------------------|
| <i>Network</i>                            | The network type.                                 |
| <i>Edge</i> <sub>↔</sub><br><i>RndIt</i>  | A random iterator type used to iterate on edges.  |
| <i>Score</i> <sub>↔</sub><br><i>RndIt</i> | A random iterator type used to iterate on scores. |

### 9.26.2 Constructor & Destructor Documentation

#### 9.26.2.1 DSAPredictor() [1/3]

```
template<typename Network = DNetwork<>, typename EdgeRndIt = typename std::vector<typename
Network::Edge>::const_iterator, typename ScoreRndIt = typename std::vector<double>::iterator,
typename EdgeRndOutIt = typename std::vector<typename Network::Edge>::iterator>
LinkPred::DSAPredictor< Network, EdgeRndIt, ScoreRndIt, EdgeRndOutIt >::DSAPredictor (
    std::shared_ptr< Network const > net ) [inline]
```

#### Parameters

|            |              |
|------------|--------------|
| <i>net</i> | The network. |
|------------|--------------|

### 9.26.2.2 DSAIPredictor() [2/3]

```
template<typename Network = DNetwork<>, typename EdgeRndIt = typename std::vector<typename
Network::Edge>::const_iterator, typename ScoreRndIt = typename std::vector<double>::iterator,
typename EdgeRndOutIt = typename std::vector<typename Network::Edge>::iterator>
LinkPred::DSAIPredictor< Network, EdgeRndIt, ScoreRndIt, EdgeRndOutIt >::DSAIPredictor (
    DSAIPredictor< Network, EdgeRndIt, ScoreRndIt, EdgeRndOutIt > const & that )
[default]
```

Copy constructor.

#### Parameters

|             |                     |
|-------------|---------------------|
| <i>that</i> | The object to copy. |
|-------------|---------------------|

### 9.26.2.3 DSAIPredictor() [3/3]

```
template<typename Network = DNetwork<>, typename EdgeRndIt = typename std::vector<typename
Network::Edge>::const_iterator, typename ScoreRndIt = typename std::vector<double>::iterator,
typename EdgeRndOutIt = typename std::vector<typename Network::Edge>::iterator>
LinkPred::DSAIPredictor< Network, EdgeRndIt, ScoreRndIt, EdgeRndOutIt >::DSAIPredictor (
    DSAIPredictor< Network, EdgeRndIt, ScoreRndIt, EdgeRndOutIt > && that ) [default]
```

Move constructor.

#### Parameters

|             |                     |
|-------------|---------------------|
| <i>that</i> | The object to move. |
|-------------|---------------------|

### 9.26.2.4 ~DSAIPredictor()

```
template<typename Network = DNetwork<>, typename EdgeRndIt = typename std::vector<typename
Network::Edge>::const_iterator, typename ScoreRndIt = typename std::vector<double>::iterator,
typename EdgeRndOutIt = typename std::vector<typename Network::Edge>::iterator>
virtual LinkPred::DSAIPredictor< Network, EdgeRndIt, ScoreRndIt, EdgeRndOutIt >::~~DSAIPredictor
( ) [virtual], [default]
```

Destructor.

## 9.26.3 Member Function Documentation

### 9.26.3.1 init()

```
template<typename Network = DNetwork<>, typename EdgeRndIt = typename std::vector<typename
Network::Edge>::const_iterator, typename ScoreRndIt = typename std::vector<double>::iterator,
typename EdgeRndOutIt = typename std::vector<typename Network::Edge>::iterator>
virtual void LinkPred::DSAPredictor< Network, EdgeRndIt, ScoreRndIt, EdgeRndOutIt >::init ( )
[inline], [virtual]
```

Initialize the solver.

Implements [LinkPred::DLPredictor< DNetwork<>, typename std::vector< typename DNetwork<> ::Edge >::const\\_iterator, typen](#)

### 9.26.3.2 learn()

```
template<typename Network = DNetwork<>, typename EdgeRndIt = typename std::vector<typename
Network::Edge>::const_iterator, typename ScoreRndIt = typename std::vector<double>::iterator,
typename EdgeRndOutIt = typename std::vector<typename Network::Edge>::iterator>
virtual void LinkPred::DSAPredictor< Network, EdgeRndIt, ScoreRndIt, EdgeRndOutIt >::learn (
) [inline], [virtual]
```

Learn.

Implements [LinkPred::DLPredictor< DNetwork<>, typename std::vector< typename DNetwork<> ::Edge >::const\\_iterator, typen](#)

### 9.26.3.3 operator=() [1/2]

```
template<typename Network = DNetwork<>, typename EdgeRndIt = typename std::vector<typename
Network::Edge>::const_iterator, typename ScoreRndIt = typename std::vector<double>::iterator,
typename EdgeRndOutIt = typename std::vector<typename Network::Edge>::iterator>
DSAPredictor& LinkPred::DSAPredictor< Network, EdgeRndIt, ScoreRndIt, EdgeRndOutIt >::operator=
(
    DSAIPredictor< Network, EdgeRndIt, ScoreRndIt, EdgeRndOutIt > && that ) [default]
```

Move assignment operator.

#### Parameters

|             |                     |
|-------------|---------------------|
| <i>that</i> | The object to move. |
|-------------|---------------------|

### 9.26.3.4 operator=() [2/2]

```
template<typename Network = DNetwork<>, typename EdgeRndIt = typename std::vector<typename
Network::Edge>::const_iterator, typename ScoreRndIt = typename std::vector<double>::iterator,
typename EdgeRndOutIt = typename std::vector<typename Network::Edge>::iterator>
```

```

DSAPredictor& LinkPred::DSAPredictor< Network, EdgeRndIt, ScoreRndIt, EdgeRndOutIt >::operator=
(
    DSAIPredictor< Network, EdgeRndIt, ScoreRndIt, EdgeRndOutIt > const & that )
[default]

```

Copy assignment operator.

#### Parameters

|             |                     |
|-------------|---------------------|
| <i>that</i> | The object to copy. |
|-------------|---------------------|

### 9.26.3.5 predict()

```

template<typename Network = DNetwork<>, typename EdgeRndIt = typename std::vector<typename
Network::Edge>::const_iterator, typename ScoreRndIt = typename std::vector<double>::iterator,
typename EdgeRndOutIt = typename std::vector<typename Network::Edge>::iterator>
virtual void LinkPred::DSAPredictor< Network, EdgeRndIt, ScoreRndIt, EdgeRndOutIt >::predict
(
    EdgeRndIt begin,
    EdgeRndIt end,
    ScoreRndIt scores ) [virtual]

```

Predict the links.

#### Parameters

|               |                                         |
|---------------|-----------------------------------------|
| <i>begin</i>  | Beginning of the links to be predicted. |
| <i>end</i>    | end of the links to be predicted.       |
| <i>scores</i> | Beginning of scores.                    |

Reimplemented from [LinkPred::DLPredictor< DNetwork<>, typename std::vector< typename DNetwork<> ::Edge >::const\\_iterator](#)

### 9.26.3.6 score()

```

template<typename Network = DNetwork<>, typename EdgeRndIt = typename std::vector<typename
Network::Edge>::const_iterator, typename ScoreRndIt = typename std::vector<double>::iterator,
typename EdgeRndOutIt = typename std::vector<typename Network::Edge>::iterator>
virtual double LinkPred::DSAPredictor< Network, EdgeRndIt, ScoreRndIt, EdgeRndOutIt >::score
(
    Edge const & e ) [virtual]

```

Compute the score of a single edge.

#### Parameters

|          |           |
|----------|-----------|
| <i>e</i> | The edge. |
|----------|-----------|



**Returns**

The score of *e*.

**9.26.3.7 top()**

```
template<typename Network = DNetwork<>, typename EdgeRndIt = typename std::vector<typename
Network::Edge>::const_iterator, typename ScoreRndIt = typename std::vector<double>::iterator,
typename EdgeRndOutIt = typename std::vector<typename Network::Edge>::iterator>
virtual std::size_t LinkPred::DSOIPredictor< Network, EdgeRndIt, ScoreRndIt, EdgeRndOutIt >↵
::top (
    std::size_t k,
    EdgeRndOutIt eit,
    ScoreRndIt sit ) [virtual]
```

Finds the *k* negative edges with the top score. Ties are broken randomly.

**Parameters**

|            |                                                                                                         |
|------------|---------------------------------------------------------------------------------------------------------|
| <i>k</i>   | The number of edges to find.                                                                            |
| <i>eit</i> | An output iterator where the edges are written.                                                         |
| <i>sit</i> | An output iterator where the scores are written. The scores are written in the same order as the edges. |

**Returns**

The number of negative edges inserted. It is the minimum between *k* and the number of negative edges in the network.

Reimplemented from [LinkPred::DLPredictor< DNetwork<>, typename std::vector< typename DNetwork<> ::Edge >::const\\_iterator](#)

The documentation for this class was generated from the following file:

- [include/linkpred/predictors/directed/dsaipredictor.hpp](#)

## 9.27 LinkPred::DSOIPredictor< Network, EdgeRndIt, ScoreRndIt, EdgeRndOutIt > Class Template Reference

Common neighbor link predictor adapted to directed networks.

```
#include <dsoipredictor.hpp>
```

Inheritance diagram for LinkPred::DSOIPredictor< Network, EdgeRndIt, ScoreRndIt, EdgeRndOutIt >:

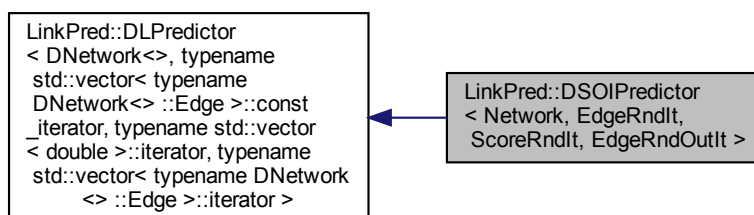

Collaboration diagram for LinkPred::DSOIPredictor< Network, EdgeRndIt, ScoreRndIt, EdgeRndOutIt >:

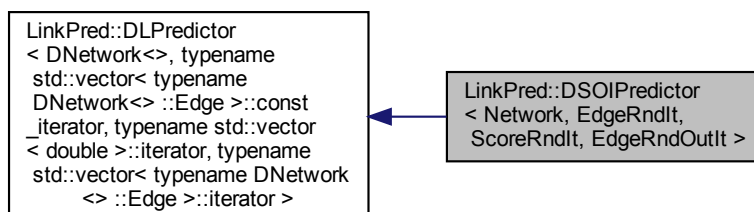

## Public Member Functions

- [DSOIPredictor](#) (std::shared\_ptr< [Network](#) const > net)
- [DSOIPredictor](#) ([DSOIPredictor](#) const &that)=default
- [DSOIPredictor](#) & operator= ([DSOIPredictor](#) const &that)=default
- [DSOIPredictor](#) ([DSOIPredictor](#) &&that)=default
- [DSOIPredictor](#) & operator= ([DSOIPredictor](#) &&that)=default
- virtual void [init](#) ()
- virtual void [learn](#) ()
- virtual void [predict](#) ([EdgeRndIt](#) begin, [EdgeRndIt](#) end, [ScoreRndIt](#) scores)
- virtual double [score](#) ([Edge](#) const &e)
- virtual std::size\_t [top](#) (std::size\_t k, [EdgeRndOutIt](#) eit, [ScoreRndIt](#) sit)
- virtual ~[DSOIPredictor](#) ()=default

## Additional Inherited Members

### 9.27.1 Detailed Description

```

template<typename Network = DNetwork<>, typename EdgeRndIt = typename std::vector<typename Network::Edge>::const_iterator,
        typename ScoreRndIt = typename std::vector<double>::iterator, typename EdgeRndOutIt = typename std::vector<typename Network::Edge>::iterator>
class LinkPred::DSOIPredictor< Network, EdgeRndIt, ScoreRndIt, EdgeRndOutIt >
  
```

Common neighbor link predictor adapted to directed networks.

## Template Parameters

|                         |                                                   |
|-------------------------|---------------------------------------------------|
| <i>Network</i>          | The network type.                                 |
| <i>Edge↔<br/>RndIt</i>  | A random iterator type used to iterate on edges.  |
| <i>Score↔<br/>RndIt</i> | A random iterator type used to iterate on scores. |

## 9.27.2 Constructor &amp; Destructor Documentation

## 9.27.2.1 DSOIPredictor() [1/3]

```
template<typename Network = DNetwork<>, typename EdgeRndIt = typename std::vector<typename
Network::Edge>::const_iterator, typename ScoreRndIt = typename std::vector<double>::iterator,
typename EdgeRndOutIt = typename std::vector<typename Network::Edge>::iterator>
LinkPred::DSOIPredictor< Network, EdgeRndIt, ScoreRndIt, EdgeRndOutIt >::DSOIPredictor (
    std::shared_ptr< Network const > net ) [inline]
```

## Parameters

|            |              |
|------------|--------------|
| <i>net</i> | The network. |
|------------|--------------|

## 9.27.2.2 DSOIPredictor() [2/3]

```
template<typename Network = DNetwork<>, typename EdgeRndIt = typename std::vector<typename
Network::Edge>::const_iterator, typename ScoreRndIt = typename std::vector<double>::iterator,
typename EdgeRndOutIt = typename std::vector<typename Network::Edge>::iterator>
LinkPred::DSOIPredictor< Network, EdgeRndIt, ScoreRndIt, EdgeRndOutIt >::DSOIPredictor (
    DSOIPredictor< Network, EdgeRndIt, ScoreRndIt, EdgeRndOutIt > const & that )
[default]
```

Copy constructor.

## Parameters

|             |                     |
|-------------|---------------------|
| <i>that</i> | The object to copy. |
|-------------|---------------------|

## 9.27.2.3 DSOIPredictor() [3/3]

```
template<typename Network = DNetwork<>, typename EdgeRndIt = typename std::vector<typename
Network::Edge>::const_iterator, typename ScoreRndIt = typename std::vector<double>::iterator,
```

```

typename EdgeRndOutIt = typename std::vector<typename Network::Edge>::iterator>
LinkPred::DSOIPredictor< Network, EdgeRndIt, ScoreRndIt, EdgeRndOutIt >::DSOIPredictor (
    DSOIPredictor< Network, EdgeRndIt, ScoreRndIt, EdgeRndOutIt > && that ) [default]

```

Move constructor.

#### Parameters

|             |                     |
|-------------|---------------------|
| <i>that</i> | The object to move. |
|-------------|---------------------|

### 9.27.2.4 ~DSOIPredictor()

```

template<typename Network = DNetwork<>, typename EdgeRndIt = typename std::vector<typename
Network::Edge>::const_iterator, typename ScoreRndIt = typename std::vector<double>::iterator,
typename EdgeRndOutIt = typename std::vector<typename Network::Edge>::iterator>
virtual LinkPred::DSOIPredictor< Network, EdgeRndIt, ScoreRndIt, EdgeRndOutIt >::~~DSOIPredictor
( ) [virtual], [default]

```

Destructor.

## 9.27.3 Member Function Documentation

### 9.27.3.1 init()

```

template<typename Network = DNetwork<>, typename EdgeRndIt = typename std::vector<typename
Network::Edge>::const_iterator, typename ScoreRndIt = typename std::vector<double>::iterator,
typename EdgeRndOutIt = typename std::vector<typename Network::Edge>::iterator>
virtual void LinkPred::DSOIPredictor< Network, EdgeRndIt, ScoreRndIt, EdgeRndOutIt >::init ( )
[inline], [virtual]

```

Initialize the solver.

Implements [LinkPred::DLPredictor< DNetwork<>, typename std::vector< typename DNetwork<> ::Edge >::const\\_iterator, typena](#)

### 9.27.3.2 learn()

```

template<typename Network = DNetwork<>, typename EdgeRndIt = typename std::vector<typename
Network::Edge>::const_iterator, typename ScoreRndIt = typename std::vector<double>::iterator,
typename EdgeRndOutIt = typename std::vector<typename Network::Edge>::iterator>
virtual void LinkPred::DSOIPredictor< Network, EdgeRndIt, ScoreRndIt, EdgeRndOutIt >::learn (
) [inline], [virtual]

```

Learn.

Implements [LinkPred::DLPredictor< DNetwork<>, typename std::vector< typename DNetwork<> ::Edge >::const\\_iterator, typena](#)

### 9.27.3.3 operator=() [1/2]

```
template<typename Network = DNetwork<>, typename EdgeRndIt = typename std::vector<typename
Network::Edge>::const_iterator, typename ScoreRndIt = typename std::vector<double>::iterator,
typename EdgeRndOutIt = typename std::vector<typename Network::Edge>::iterator>
DSOIPredictor& LinkPred::DSOIPredictor< Network, EdgeRndIt, ScoreRndIt, EdgeRndOutIt >::operator=
(
    DSOIPredictor< Network, EdgeRndIt, ScoreRndIt, EdgeRndOutIt > && that ) [default]
```

Move assignment operator.

#### Parameters

|             |                     |
|-------------|---------------------|
| <i>that</i> | The object to move. |
|-------------|---------------------|

### 9.27.3.4 operator=() [2/2]

```
template<typename Network = DNetwork<>, typename EdgeRndIt = typename std::vector<typename
Network::Edge>::const_iterator, typename ScoreRndIt = typename std::vector<double>::iterator,
typename EdgeRndOutIt = typename std::vector<typename Network::Edge>::iterator>
DSOIPredictor& LinkPred::DSOIPredictor< Network, EdgeRndIt, ScoreRndIt, EdgeRndOutIt >::operator=
(
    DSOIPredictor< Network, EdgeRndIt, ScoreRndIt, EdgeRndOutIt > const & that )
[default]
```

Copy assignment operator.

#### Parameters

|             |                     |
|-------------|---------------------|
| <i>that</i> | The object to copy. |
|-------------|---------------------|

### 9.27.3.5 predict()

```
template<typename Network = DNetwork<>, typename EdgeRndIt = typename std::vector<typename
Network::Edge>::const_iterator, typename ScoreRndIt = typename std::vector<double>::iterator,
typename EdgeRndOutIt = typename std::vector<typename Network::Edge>::iterator>
virtual void LinkPred::DSOIPredictor< Network, EdgeRndIt, ScoreRndIt, EdgeRndOutIt >::predict
(
    EdgeRndIt begin,
    EdgeRndIt end,
    ScoreRndIt scores ) [virtual]
```

Predict the links.

#### Parameters

|               |                                         |
|---------------|-----------------------------------------|
| <i>begin</i>  | Beginning of the links to be predicted. |
| <i>end</i>    | end of the links to be predicted.       |
| <i>scores</i> | Beginning of scores.                    |

Reimplemented from [LinkPred::DLPredictor< DNetwork<>, typename std::vector< typename DNetwork<> ::Edge >::const\\_iterator](#)

### 9.27.3.6 score()

```
template<typename Network = DNetwork<>, typename EdgeRndIt = typename std::vector<typename
Network::Edge>::const_iterator, typename ScoreRndIt = typename std::vector<double>::iterator,
typename EdgeRndOutIt = typename std::vector<typename Network::Edge>::iterator>
virtual double LinkPred::DSOIPredictor< Network, EdgeRndIt, ScoreRndIt, EdgeRndOutIt >::score
(
    Edge const & e ) [virtual]
```

Compute the score of a single edge.

#### Parameters

|          |           |
|----------|-----------|
| <i>e</i> | The edge. |
|----------|-----------|

#### Returns

The score of *e*.

### 9.27.3.7 top()

```
template<typename Network = DNetwork<>, typename EdgeRndIt = typename std::vector<typename
Network::Edge>::const_iterator, typename ScoreRndIt = typename std::vector<double>::iterator,
typename EdgeRndOutIt = typename std::vector<typename Network::Edge>::iterator>
virtual std::size_t LinkPred::DSOIPredictor< Network, EdgeRndIt, ScoreRndIt, EdgeRndOutIt >↔
::top (
    std::size_t k,
    EdgeRndOutIt eit,
    ScoreRndIt sit ) [virtual]
```

Finds the *k* negative edges with the top score. Ties are broken randomly.

#### Parameters

|            |                                                                                                         |
|------------|---------------------------------------------------------------------------------------------------------|
| <i>k</i>   | The number of edges to find.                                                                            |
| <i>eit</i> | An output iterator where the edges are written.                                                         |
| <i>sit</i> | An output iterator where the scores are written. The scores are written in the same order as the edges. |

#### Returns

The number of negative edges inserted. It is the minimum between *k* and the number of negative edges in the network.

Reimplemented from [LinkPred::DLPredictor< DNetwork<>, typename std::vector< typename DNetwork<> ::Edge >::const\\_iterator](#)

The documentation for this class was generated from the following file:

- [include/linkpred/predictors/directed/dsoipredictor.hpp](#)

## 9.28 LinkPred::Simp::Evaluator::Factory::ECLParams Struct Reference

Parameters of ECL.

```
#include <evaluator.hpp>
```

### Public Attributes

- `std::string` `encoderName` = "N2V"
- `std::string` `classifierName` = "LGR"
- `int` `dim` = 0
- `double` `posRatio` = 1.0
- `double` `negRatio` = 1.0
- `long int` `seed` = 0

### 9.28.1 Detailed Description

Parameters of ECL.

### 9.28.2 Member Data Documentation

#### 9.28.2.1 classifierName

```
std::string LinkPred::Simp::Evaluator::Factory::ECLParams::classifierName = "LGR"
```

The name of the classifier. Possible values are: DTP (simple dot product between the features), FFN (feed-forward neural network with default architecture), LSVM (linear SVM), LGR (logistic regression), NVB (naive Bayes). All classifiers except logistic regression require compilation with mlpack.

#### 9.28.2.2 dim

```
int LinkPred::Simp::Evaluator::Factory::ECLParams::dim = 0
```

The dimension of the embedding space. If set to zero, the default value is used (the default dimension depends on the encoder).

#### 9.28.2.3 encoderName

```
std::string LinkPred::Simp::Evaluator::Factory::ECLParams::encoderName = "N2V"
```

The name of the encoder. Possible values are: DPW ([DeepWalk](#)), [HMSM](#) (Hidden Metric Space Model), LVS ([LargeVis](#)), LEM (Laplacian Eigenmaps), LIN ([LINE](#)), LLE (Locally Linear Embedding), MFC (Matrix Factorization) and N2V ([Node2Vec](#)).

#### 9.28.2.4 negRatio

```
double LinkPred::Simp::Evaluator::Factory::ECLParams::negRatio = 1.0
```

Ratio of negative edges used in the training of the classifier.

#### 9.28.2.5 posRatio

```
double LinkPred::Simp::Evaluator::Factory::ECLParams::posRatio = 1.0
```

Ratio of positive edges used in the training of the classifier.

#### 9.28.2.6 seed

```
long int LinkPred::Simp::Evaluator::Factory::ECLParams::seed = 0
```

Seed of the random number generator.

The documentation for this struct was generated from the following file:

- [include/linkpred/simp/evaluator.hpp](#)

## 9.29 LinkPred::UNetwork< LabelT, NodeIDT, EdgeT >::EdgeMap< ValueType > Class Template Reference

An edge map.

```
#include <unetwork.hpp>
```

### Public Types

- using [EdgeMapIt](#) = typename std::map< [Edge](#), ValueType >::iterator
- using [EdgeMapConstIt](#) = typename std::map< [Edge](#), ValueType >::const\_iterator

### Public Member Functions

- [EdgeMap](#) ([EdgeMap](#) const &that)=default
- [EdgeMap](#) & operator= ([EdgeMap](#) const &that)=default
- [EdgeMap](#) ([EdgeMap](#) &&that)=default
- [EdgeMap](#) & operator= ([EdgeMap](#) &&that)=default
- ValueType operator[] ([Edge](#) const &e) const
- ValueType & operator[] ([Edge](#) const &e)
- ValueType at ([Edge](#) const &e) const
- [EdgeMapConstIt](#) find ([Edge](#) const &e) const
- [EdgeMapIt](#) find ([Edge](#) const &e)
- [EdgeMapIt](#) begin ()
- [EdgeMapIt](#) end ()
- [EdgeMapConstIt](#) cbegin () const
- [EdgeMapConstIt](#) cend () const
- std::size\_t size ()
- ~[EdgeMap](#) ()=default



## Friends

- class **UNetwork**

### 9.29.1 Detailed Description

```
template<typename LabelT = std::string, typename NodeIDT = unsigned int, typename EdgeT = unsigned long long int>
template<typename ValueType>
class LinkPred::UNetwork< LabelT, NodeIDT, EdgeT >::EdgeMap< ValueType >
```

An edge map.

This class can be used to assign a value to every edge in the network. Access to values is done in logarithmic time.

#### Template Parameters

|                  |                        |
|------------------|------------------------|
| <i>ValueType</i> | Type of mapped values. |
|------------------|------------------------|

### 9.29.2 Member Typedef Documentation

#### 9.29.2.1 EdgeMapConstIt

```
template<typename LabelT = std::string, typename NodeIDT = unsigned int, typename EdgeT =
unsigned long long int>
template<typename ValueType >
using LinkPred::UNetwork< LabelT, NodeIDT, EdgeT >::EdgeMap< ValueType >::EdgeMapConstIt =
typename std::map<Edge,ValueType>::const_iterator
```

A constant iterator on the map values.

#### 9.29.2.2 EdgeMapIt

```
template<typename LabelT = std::string, typename NodeIDT = unsigned int, typename EdgeT =
unsigned long long int>
template<typename ValueType >
using LinkPred::UNetwork< LabelT, NodeIDT, EdgeT >::EdgeMap< ValueType >::EdgeMapIt = typename
std::map<Edge, ValueType>::iterator
```

Iterator on the map values.

### 9.29.3 Constructor & Destructor Documentation

### 9.29.3.1 EdgeMap() [1/2]

```
template<typename LabelT = std::string, typename NodeIDT = unsigned int, typename EdgeT =
unsigned long long int>
template<typename ValueType >
LinkPred::UNetwork< LabelT, NodeIDT, EdgeT >::EdgeMap< ValueType >::EdgeMap (
    EdgeMap< ValueType > const & that ) [default]
```

Copy constructor.

#### Parameters

|             |                     |
|-------------|---------------------|
| <i>that</i> | The object to copy. |
|-------------|---------------------|

### 9.29.3.2 EdgeMap() [2/2]

```
template<typename LabelT = std::string, typename NodeIDT = unsigned int, typename EdgeT =
unsigned long long int>
template<typename ValueType >
LinkPred::UNetwork< LabelT, NodeIDT, EdgeT >::EdgeMap< ValueType >::EdgeMap (
    EdgeMap< ValueType > && that ) [default]
```

Move constructor.

#### Parameters

|             |                     |
|-------------|---------------------|
| <i>that</i> | The object to move. |
|-------------|---------------------|

### 9.29.3.3 ~EdgeMap()

```
template<typename LabelT = std::string, typename NodeIDT = unsigned int, typename EdgeT =
unsigned long long int>
template<typename ValueType >
LinkPred::UNetwork< LabelT, NodeIDT, EdgeT >::EdgeMap< ValueType >::~EdgeMap ( ) [default]
```

Destructor.

## 9.29.4 Member Function Documentation

### 9.29.4.1 at()

```
template<typename LabelT = std::string, typename NodeIDT = unsigned int, typename EdgeT =
unsigned long long int>
template<typename ValueType >
ValueType LinkPred::UNetwork< LabelT, NodeIDT, EdgeT >::EdgeMap< ValueType >::at (
    Edge const & e ) const [inline]
```

#### Parameters

|          |          |
|----------|----------|
| <i>e</i> | An edge. |
|----------|----------|

#### Returns

The value associated with the edge *e*.

#### 9.29.4.2 begin()

```
template<typename LabelT = std::string, typename NodeIDT = unsigned int, typename EdgeT =
unsigned long long int>
template<typename ValueType >
EdgeMapIt LinkPred::UNetwork< LabelT, NodeIDT, EdgeT >::EdgeMap< ValueType >::begin ( ) [inline]
```

#### Returns

An iterator to the first element in the map.

#### 9.29.4.3 cbegin()

```
template<typename LabelT = std::string, typename NodeIDT = unsigned int, typename EdgeT =
unsigned long long int>
template<typename ValueType >
EdgeMapConstIt LinkPred::UNetwork< LabelT, NodeIDT, EdgeT >::EdgeMap< ValueType >::cbegin ( )
const [inline]
```

#### Returns

A constant iterator to the first element in the map.

#### 9.29.4.4 cend()

```
template<typename LabelT = std::string, typename NodeIDT = unsigned int, typename EdgeT =
unsigned long long int>
template<typename ValueType >
EdgeMapConstIt LinkPred::UNetwork< LabelT, NodeIDT, EdgeT >::EdgeMap< ValueType >::cend ( )
const [inline]
```

#### Returns

A constant iterator to one-past-the-last element in the map.

**9.29.4.5 end()**

```
template<typename LabelT = std::string, typename NodeIDT = unsigned int, typename EdgeT =
unsigned long long int>
template<typename ValueType >
EdgeMapIt LinkPred::UNetwork< LabelT, NodeIDT, EdgeT >::EdgeMap< ValueType >::end ( ) [inline]
```

**Returns**

An iterator to one-past-the-last element in the map.

**9.29.4.6 find() [1/2]**

```
template<typename LabelT = std::string, typename NodeIDT = unsigned int, typename EdgeT =
unsigned long long int>
template<typename ValueType >
EdgeMapIt LinkPred::UNetwork< LabelT, NodeIDT, EdgeT >::EdgeMap< ValueType >::find (
    Edge const & e ) [inline]
```

**Parameters**

|          |          |
|----------|----------|
| <i>e</i> | An edge. |
|----------|----------|

**Returns**

Searches and return an iterator to the edge *e* and its value.

**9.29.4.7 find() [2/2]**

```
template<typename LabelT = std::string, typename NodeIDT = unsigned int, typename EdgeT =
unsigned long long int>
template<typename ValueType >
EdgeMapConstIt LinkPred::UNetwork< LabelT, NodeIDT, EdgeT >::EdgeMap< ValueType >::find (
    Edge const & e ) const [inline]
```

**Parameters**

|          |          |
|----------|----------|
| <i>e</i> | An edge. |
|----------|----------|

**Returns**

Searches and return a const iterator to the edge *e* and its value.

#### 9.29.4.8 operator=() [1/2]

```
template<typename LabelT = std::string, typename NodeIDT = unsigned int, typename EdgeT =
unsigned long long int>
template<typename ValueType >
EdgeMap& LinkPred::UNetwork< LabelT, NodeIDT, EdgeT >::EdgeMap< ValueType >::operator= (
    EdgeMap< ValueType > && that ) [default]
```

Move assignment operator.

##### Parameters

|             |                     |
|-------------|---------------------|
| <i>that</i> | The object to move. |
|-------------|---------------------|

#### 9.29.4.9 operator=() [2/2]

```
template<typename LabelT = std::string, typename NodeIDT = unsigned int, typename EdgeT =
unsigned long long int>
template<typename ValueType >
EdgeMap& LinkPred::UNetwork< LabelT, NodeIDT, EdgeT >::EdgeMap< ValueType >::operator= (
    EdgeMap< ValueType > const & that ) [default]
```

Copy assignment operator.

##### Parameters

|             |                     |
|-------------|---------------------|
| <i>that</i> | The object to copy. |
|-------------|---------------------|

#### 9.29.4.10 operator[]() [1/2]

```
template<typename LabelT = std::string, typename NodeIDT = unsigned int, typename EdgeT =
unsigned long long int>
template<typename ValueType >
ValueType& LinkPred::UNetwork< LabelT, NodeIDT, EdgeT >::EdgeMap< ValueType >::operator[] (
    Edge const & e ) [inline]
```

##### Parameters

|          |          |
|----------|----------|
| <i>e</i> | An edge. |
|----------|----------|

##### Returns

A reference to the value associated with the edge *e*.

**9.29.4.11 operator[]()** [2/2]

```
template<typename LabelT = std::string, typename NodeIDT = unsigned int, typename EdgeT =
unsigned long long int>
template<typename ValueType >
ValueType LinkPred::UNetwork< LabelT, NodeIDT, EdgeT >::EdgeMap< ValueType >::operator[] (
    Edge const & e ) const [inline]
```

**Parameters**

|          |          |
|----------|----------|
| <i>e</i> | An edge. |
|----------|----------|

**Returns**

The value associated with the edge *e*.

**9.29.4.12 size()**

```
template<typename LabelT = std::string, typename NodeIDT = unsigned int, typename EdgeT =
unsigned long long int>
template<typename ValueType >
std::size_t LinkPred::UNetwork< LabelT, NodeIDT, EdgeT >::EdgeMap< ValueType >::size ( )
[inline]
```

**Returns**

The size of the map.

The documentation for this class was generated from the following file:

- [include/linkpred/core/unetwork/unetwork.hpp](#)

## 9.30 LinkPred::DNetwork< LabelT, NodeIDT, EdgeT >::EdgeMap< ValueType > Class Template Reference

An edge map.

```
#include <dnetwork.hpp>
```

**Public Types**

- using [EdgeMapIt](#) = typename std::map< [Edge](#), ValueType >::iterator
- using [EdgeMapConstIt](#) = typename std::map< [Edge](#), ValueType >::const\_iterator

## Public Member Functions

- [EdgeMap](#) ([EdgeMap](#) const &that)=default
- [EdgeMap](#) & [operator=](#) ([EdgeMap](#) const &that)=default
- [EdgeMap](#) ([EdgeMap](#) &&that)=default
- [EdgeMap](#) & [operator=](#) ([EdgeMap](#) &&that)=default
- [ValueType](#) [operator\[\]](#) ([Edge](#) const &e) const
- [ValueType](#) & [operator\[\]](#) ([Edge](#) const &e)
- [ValueType](#) [at](#) ([Edge](#) const &e) const
- [EdgeMapConstIt](#) [find](#) ([Edge](#) const &e) const
- [EdgeMapIt](#) [find](#) ([Edge](#) const &e)
- [EdgeMapIt](#) [begin](#) ()
- [EdgeMapIt](#) [end](#) ()
- [EdgeMapConstIt](#) [cbegin](#) () const
- [EdgeMapConstIt](#) [cend](#) () const
- [std::size\\_t](#) [size](#) ()
- [~EdgeMap](#) ()=default

## Friends

- class **DNetwork**

### 9.30.1 Detailed Description

```
template<typename LabelT = std::string, typename NodeIDT = unsigned int, typename EdgeT = unsigned long long int>
template<typename ValueType>
class LinkPred::DNetwork< LabelT, NodeIDT, EdgeT >::EdgeMap< ValueType >
```

An edge map.

This class can be used to assign a value to every edge in the network. Access to values is done in logarithmic time.

#### Template Parameters

|                  |                        |
|------------------|------------------------|
| <i>ValueType</i> | Type of mapped values. |
|------------------|------------------------|

### 9.30.2 Member Typedef Documentation

#### 9.30.2.1 EdgeMapConstIt

```
template<typename LabelT = std::string, typename NodeIDT = unsigned int, typename EdgeT =
unsigned long long int>
template<typename ValueType>
using LinkPred::DNetwork< LabelT, NodeIDT, EdgeT >::EdgeMap< ValueType >::EdgeMapConstIt =
typename std::map<Edge,ValueType>::const_iterator
```

A constant iterator on the map values.

### 9.30.2.2 EdgeMapIt

```
template<typename LabelT = std::string, typename NodeIDT = unsigned int, typename EdgeT =
unsigned long long int>
template<typename ValueType >
using LinkPred::DNetwork< LabelT, NodeIDT, EdgeT >::EdgeMap< ValueType >::EdgeMapIt = typename
std::map<Edge, ValueType>::iterator
```

Iterator on the map values.

## 9.30.3 Constructor & Destructor Documentation

### 9.30.3.1 EdgeMap() [1/2]

```
template<typename LabelT = std::string, typename NodeIDT = unsigned int, typename EdgeT =
unsigned long long int>
template<typename ValueType >
LinkPred::DNetwork< LabelT, NodeIDT, EdgeT >::EdgeMap< ValueType >::EdgeMap (
    EdgeMap< ValueType > const & that ) [default]
```

Copy constructor.

#### Parameters

|             |                     |
|-------------|---------------------|
| <i>that</i> | The object to copy. |
|-------------|---------------------|

### 9.30.3.2 EdgeMap() [2/2]

```
template<typename LabelT = std::string, typename NodeIDT = unsigned int, typename EdgeT =
unsigned long long int>
template<typename ValueType >
LinkPred::DNetwork< LabelT, NodeIDT, EdgeT >::EdgeMap< ValueType >::EdgeMap (
    EdgeMap< ValueType > && that ) [default]
```

Move constructor.

#### Parameters

|             |                     |
|-------------|---------------------|
| <i>that</i> | The object to move. |
|-------------|---------------------|

### 9.30.3.3 ~EdgeMap()

```
template<typename LabelT = std::string, typename NodeIDT = unsigned int, typename EdgeT =
```



```
unsigned long long int>
template<typename ValueType >
LinkPred::DNetwork< LabelT, NodeIDT, EdgeT >::EdgeMap< ValueType >::~~EdgeMap ( ) [default]
```

Destructor.

## 9.30.4 Member Function Documentation

### 9.30.4.1 at()

```
template<typename LabelT = std::string, typename NodeIDT = unsigned int, typename EdgeT =
unsigned long long int>
template<typename ValueType >
ValueType LinkPred::DNetwork< LabelT, NodeIDT, EdgeT >::EdgeMap< ValueType >::at (
    Edge const & e ) const [inline]
```

#### Parameters

|          |          |
|----------|----------|
| <i>e</i> | An edge. |
|----------|----------|

#### Returns

The value associated with the edge *e*.

### 9.30.4.2 begin()

```
template<typename LabelT = std::string, typename NodeIDT = unsigned int, typename EdgeT =
unsigned long long int>
template<typename ValueType >
EdgeMapIt LinkPred::DNetwork< LabelT, NodeIDT, EdgeT >::EdgeMap< ValueType >::begin ( ) [inline]
```

#### Returns

An iterator to the first element in the map.

### 9.30.4.3 cbegin()

```
template<typename LabelT = std::string, typename NodeIDT = unsigned int, typename EdgeT =
unsigned long long int>
template<typename ValueType >
EdgeMapConstIt LinkPred::DNetwork< LabelT, NodeIDT, EdgeT >::EdgeMap< ValueType >::cbegin ( )
const [inline]
```

#### Returns

A constant iterator to the first element in the map.

#### 9.30.4.4 cend()

```
template<typename LabelT = std::string, typename NodeIDT = unsigned int, typename EdgeT =
unsigned long long int>
template<typename ValueType >
EdgeMapConstIt LinkPred::DNetwork< LabelT, NodeIDT, EdgeT >::EdgeMap< ValueType >::cend ( )
const [inline]
```

##### Returns

A constant iterator to one-past-the-last element in the map.

#### 9.30.4.5 end()

```
template<typename LabelT = std::string, typename NodeIDT = unsigned int, typename EdgeT =
unsigned long long int>
template<typename ValueType >
EdgeMapIt LinkPred::DNetwork< LabelT, NodeIDT, EdgeT >::EdgeMap< ValueType >::end ( ) [inline]
```

##### Returns

An iterator to one-past-the-last element in the map.

#### 9.30.4.6 find() [1/2]

```
template<typename LabelT = std::string, typename NodeIDT = unsigned int, typename EdgeT =
unsigned long long int>
template<typename ValueType >
EdgeMapIt LinkPred::DNetwork< LabelT, NodeIDT, EdgeT >::EdgeMap< ValueType >::find (
    Edge const & e ) [inline]
```

##### Parameters

|          |          |
|----------|----------|
| <i>e</i> | An edge. |
|----------|----------|

##### Returns

Searches and return an iterator to the edge *e* and its value.

#### 9.30.4.7 find() [2/2]

```
template<typename LabelT = std::string, typename NodeIDT = unsigned int, typename EdgeT =
unsigned long long int>
```

```
template<typename ValueType >
EdgeMapConstIt LinkPred::DNetwork< LabelT, NodeIDT, EdgeT >::EdgeMap< ValueType >::find (
    Edge const & e ) const    [inline]
```

#### Parameters

|          |          |
|----------|----------|
| <i>e</i> | An edge. |
|----------|----------|

#### Returns

Searches and return a const iterator to the edge *e* and its value.

#### 9.30.4.8 operator=() [1/2]

```
template<typename LabelT = std::string, typename NodeIDT = unsigned int, typename EdgeT =
unsigned long long int>
template<typename ValueType >
EdgeMap& LinkPred::DNetwork< LabelT, NodeIDT, EdgeT >::EdgeMap< ValueType >::operator= (
    EdgeMap< ValueType > && that ) [default]
```

Move assignment operator.

#### Parameters

|             |                     |
|-------------|---------------------|
| <i>that</i> | The object to move. |
|-------------|---------------------|

#### 9.30.4.9 operator=() [2/2]

```
template<typename LabelT = std::string, typename NodeIDT = unsigned int, typename EdgeT =
unsigned long long int>
template<typename ValueType >
EdgeMap& LinkPred::DNetwork< LabelT, NodeIDT, EdgeT >::EdgeMap< ValueType >::operator= (
    EdgeMap< ValueType > const & that ) [default]
```

Copy assignment operator.

#### Parameters

|             |                     |
|-------------|---------------------|
| <i>that</i> | The object to copy. |
|-------------|---------------------|

#### 9.30.4.10 operator[]() [1/2]

```
template<typename LabelT = std::string, typename NodeIDT = unsigned int, typename EdgeT =
```

```

unsigned long long int>
template<typename ValueType >
ValueType& LinkPred::DNetwork< LabelT, NodeIDT, EdgeT >::EdgeMap< ValueType >::operator[] (
    Edge const & e ) [inline]

```

#### Parameters

|          |          |
|----------|----------|
| <i>e</i> | An edge. |
|----------|----------|

#### Returns

A reference to the value associated with the edge *e*.

### 9.30.4.11 operator[]() [2/2]

```

template<typename LabelT = std::string, typename NodeIDT = unsigned int, typename EdgeT =
unsigned long long int>
template<typename ValueType >
ValueType LinkPred::DNetwork< LabelT, NodeIDT, EdgeT >::EdgeMap< ValueType >::operator[] (
    Edge const & e ) const [inline]

```

#### Parameters

|          |          |
|----------|----------|
| <i>e</i> | An edge. |
|----------|----------|

#### Returns

The value associated with the edge *e*.

### 9.30.4.12 size()

```

template<typename LabelT = std::string, typename NodeIDT = unsigned int, typename EdgeT =
unsigned long long int>
template<typename ValueType >
std::size_t LinkPred::DNetwork< LabelT, NodeIDT, EdgeT >::EdgeMap< ValueType >::size ( )
[inline]

```

#### Returns

The size of the map.

The documentation for this class was generated from the following file:

- [include/linkpred/core/dnetwork/dnetwork.hpp](#)

## 9.31 LinkPred::Utils::EdgeScore< Label > Struct Template Reference

A structure to store the score of an edge.

```
#include <miscutils.hpp>
```

### Public Attributes

- Label [i](#)
- Label [j](#)
- double [score](#)

### 9.31.1 Detailed Description

```
template<typename Label = std::string>  
struct LinkPred::Utils::EdgeScore< Label >
```

A structure to store the score of an edge.

Template Parameters

|              |                 |
|--------------|-----------------|
| <i>Label</i> | The label type. |
|--------------|-----------------|

### 9.31.2 Member Data Documentation

#### 9.31.2.1 [i](#)

```
template<typename Label = std::string>  
Label LinkPred::Utils::EdgeScore< Label >::i
```

The start node.

#### 9.31.2.2 [j](#)

```
template<typename Label = std::string>  
Label LinkPred::Utils::EdgeScore< Label >::j
```

The end node.

### 9.31.2.3 score

```
template<typename Label = std::string>
double LinkPred::Utils::EdgeScore< Label >::score
```

The score.

The documentation for this struct was generated from the following file:

- include/linkpred/utis/miscutils.hpp

## 9.32 LinkPred::Simp::EdgeScore Struct Reference

A structure to store the score of an edge.

```
#include <edgescore.hpp>
```

### Public Attributes

- std::string [i](#)
- std::string [j](#)
- double [score](#)

### 9.32.1 Detailed Description

A structure to store the score of an edge.

### 9.32.2 Member Data Documentation

#### 9.32.2.1 i

```
std::string LinkPred::Simp::EdgeScore::i
```

The label of the start node.

#### 9.32.2.2 j

```
std::string LinkPred::Simp::EdgeScore::j
```

The label of the end node.

### 9.32.2.3 score

```
double LinkPred::Simp::EdgeScore::score
```

The score.

The documentation for this struct was generated from the following file:

- include/linkpred/simp/edgescore.hpp

## 9.33 LinkPred::Simp::EdgeScoreByID Struct Reference

A structure to store the score of an edge. The node IDs are used instead of labels.

```
#include <edgescore.hpp>
```

### Public Attributes

- int [i](#)
- int [j](#)
- double [score](#)

### 9.33.1 Detailed Description

A structure to store the score of an edge. The node IDs are used instead of labels.

This is useful for reducing memory consumption for large networks.

### 9.33.2 Member Data Documentation

#### 9.33.2.1 i

```
int LinkPred::Simp::EdgeScoreByID::i
```

The ID of the start node.

#### 9.33.2.2 j

```
int LinkPred::Simp::EdgeScoreByID::j
```

The ID of the end node.

### 9.33.2.3 score

```
double LinkPred::Simp::EdgeScoreByID::score
```

The score.

The documentation for this struct was generated from the following file:

- include/linkpred/simp/edgescore.hpp

## 9.34 LinkPred::Encoder< Network > Class Template Reference

The interface of a network encoder.

```
#include <encoder.hpp>
```

### Public Types

- using [NodeID](#) = typename Network::NodeID
- using [Edge](#) = typename Network::Edge
- using [CodeMap](#) = typename Network::template NodeMap< [Vec](#) >
- using [CodeMapSP](#) = typename Network::template NodeMapSP< [Vec](#) >
- using [WeightMap](#) = typename Network::template EdgeMap< double >
- using [WeightMapSP](#) = typename Network::template EdgeMapSP< double >

### Public Member Functions

- [Encoder](#) (std::shared\_ptr< Network const > net)
- [Encoder](#) ([Encoder](#) const &that)=default
- [Encoder](#) & operator= ([Encoder](#) const &that)=default
- [Encoder](#) ([Encoder](#) &&that)=default
- [Encoder](#) & operator= ([Encoder](#) &&that)=default
- virtual void [init](#) ()=0
- virtual void [encode](#) ()=0
- [CodeMapSP](#) [getNodeCodeMap](#) ()
- [Vec](#) [getNodeCode](#) ([NodeID](#) const &i)
- virtual [Vec](#) [getEdgeCode](#) ([NodeID](#) const &i, [NodeID](#) const &j)
- [Vec](#) [getEdgeCode](#) ([Edge](#) const &e)
- virtual int [getEdgeCodeDim](#) () const
- int [getDim](#) () const
- void [setDim](#) (int dim)
- const std::string & [getName](#) () const
- void [setName](#) (const std::string &name)
- const [WeightMapSP](#) & [getWeightMap](#) () const
- virtual void [setWeightMap](#) (const [WeightMapSP](#) &weightMap)
- virtual ~[Encoder](#) ()=default

### 9.34.1 Detailed Description

```
template<typename Network = UNetwork<>>
class LinkPred::Encoder< Network >
```

The interface of a network encoder.



## Template Parameters

|                |                   |
|----------------|-------------------|
| <i>Network</i> | The network type. |
|----------------|-------------------|

## 9.34.2 Member Typedef Documentation

### 9.34.2.1 CodeMap

```
template<typename Network = UNetwork<>>
using LinkPred::Encoder< Network >::CodeMap = typename Network::template NodeMap<Vec>
```

Code map type.

### 9.34.2.2 CodeMapSP

```
template<typename Network = UNetwork<>>
using LinkPred::Encoder< Network >::CodeMapSP = typename Network::template NodeMapSP<Vec>
```

Shared pointer to a code map.

### 9.34.2.3 Edge

```
template<typename Network = UNetwork<>>
using LinkPred::Encoder< Network >::Edge = typename Network::Edge
```

Edge type.

### 9.34.2.4 NodeID

```
template<typename Network = UNetwork<>>
using LinkPred::Encoder< Network >::NodeID = typename Network::NodeID
```

Node ID type.

### 9.34.2.5 WeightMap

```
template<typename Network = UNetwork<>>
using LinkPred::Encoder< Network >::WeightMap = typename Network::template EdgeMap<double>
```

Edge weight map type.

### 9.34.2.6 WeightMapSP

```
template<typename Network = UNetwork<>>
using LinkPred::Encoder< Network >::WeightMapSP = typename Network::template EdgeMapSP<double>
```

Shared pointer to an edge weight map.

## 9.34.3 Constructor & Destructor Documentation

### 9.34.3.1 Encoder() [1/3]

```
template<typename Network = UNetwork<>>
LinkPred::Encoder< Network >::Encoder (
    std::shared_ptr< Network const > net ) [inline]
```

Constructor.

#### Parameters

|            |              |
|------------|--------------|
| <i>net</i> | The network. |
|------------|--------------|

### 9.34.3.2 Encoder() [2/3]

```
template<typename Network = UNetwork<>>
LinkPred::Encoder< Network >::Encoder (
    Encoder< Network > const & that ) [default]
```

Copy constructor.

#### Parameters

|             |                     |
|-------------|---------------------|
| <i>that</i> | The object to copy. |
|-------------|---------------------|

### 9.34.3.3 Encoder() [3/3]

```
template<typename Network = UNetwork<>>
LinkPred::Encoder< Network >::Encoder (
    Encoder< Network > && that ) [default]
```

Move constructor.

## Parameters

|             |                     |
|-------------|---------------------|
| <i>that</i> | The object to move. |
|-------------|---------------------|

**9.34.3.4 ~Encoder()**

```
template<typename Network = UNetwork<>>
virtual LinkPred::Encoder< Network >::~~Encoder ( ) [virtual], [default]
```

Destructor.

**9.34.4 Member Function Documentation****9.34.4.1 encode()**

```
template<typename Network = UNetwork<>>
virtual void LinkPred::Encoder< Network >::encode ( ) [pure virtual]
```

Encode the network.

Implemented in [LinkPred::LINE< Network >](#), [LinkPred::Node2Vec< Network >](#), [LinkPred::DeepWalk< Network >](#), [LinkPred::LargeVis< Network >](#), [LinkPred::MatFact< Network >](#), and [LinkPred::HMSM< Network >](#).

**9.34.4.2 getDim()**

```
template<typename Network = UNetwork<>>
int LinkPred::Encoder< Network >::getDim ( ) const [inline]
```

## Returns

The dimension of the embedding (node embedding).

**9.34.4.3 getEdgeCode() [1/2]**

```
template<typename Network = UNetwork<>>
Vec LinkPred::Encoder< Network >::getEdgeCode (
    Edge const & e ) [inline]
```

Shortcut for the previous method.

## Parameters

|          |           |
|----------|-----------|
| <i>e</i> | The edge. |
|----------|-----------|

## Returns

The encoding of *e*.

**9.34.4.4** `getEdgeCode()` [2/2]

```
template<typename Network = UNetwork<>>
virtual Vec LinkPred::Encoder< Network >::getEdgeCode (
    NodeID const & i,
    NodeID const & j ) [inline], [virtual]
```

Return the code of given edge. This is a default implementation that simply concatenates the two node codes. Sub-classes can override this implementation and provide a more complex one.

## Parameters

|          |                    |
|----------|--------------------|
| <i>i</i> | The start node ID. |
| <i>j</i> | The end node ID.   |

## Returns

The encoding of edge (*i*,*j*).

**9.34.4.5** `getEdgeCodeDim()`

```
template<typename Network = UNetwork<>>
virtual int LinkPred::Encoder< Network >::getEdgeCodeDim ( ) const [inline], [virtual]
```

This corresponds to the default edge encoding (see the method `getEdgeCode`).

## Returns

The dimension of the edge codes.

**9.34.4.6** `getName()`

```
template<typename Network = UNetwork<>>
const std::string& LinkPred::Encoder< Network >::getName ( ) const [inline]
```

## Returns

The name of the encoder.

#### 9.34.4.7 getNodeCode()

```
template<typename Network = UNetwork<>>
Vec LinkPred::Encoder< Network >::getNodeCode (
    NodeID const & i ) [inline]
```

Return the code of given node.

##### Parameters

|          |              |
|----------|--------------|
| <i>i</i> | The node ID. |
|----------|--------------|

##### Returns

The encoding of node i.

#### 9.34.4.8 getNodeCodeMap()

```
template<typename Network = UNetwork<>>
CodeMapSP LinkPred::Encoder< Network >::getNodeCodeMap ( ) [inline]
```

Return the encoding of all nodes in the network.

##### Returns

The network encoding in the form of a node map.

#### 9.34.4.9 getWeightMap()

```
template<typename Network = UNetwork<>>
const WeightMapSP& LinkPred::Encoder< Network >::getWeightMap ( ) const [inline]
```

##### Returns

The edge weight map.

#### 9.34.4.10 init()

```
template<typename Network = UNetwork<>>
virtual void LinkPred::Encoder< Network >::init ( ) [pure virtual]
```

Initialize encoder.

Implemented in [LinkPred::LINE< Network >](#), [LinkPred::Node2Vec< Network >](#), [LinkPred::DeepWalk< Network >](#), [LinkPred::LargeVis< Network >](#), [LinkPred::MatFact< Network >](#), and [LinkPred::HMSM< Network >](#).

#### 9.34.4.11 operator=() [1/2]

```
template<typename Network = UNetwork<>>
Encoder& LinkPred::Encoder< Network >::operator= (
    Encoder< Network > && that ) [default]
```

Move assignment operator.

## Parameters

|             |                     |
|-------------|---------------------|
| <i>that</i> | The object to move. |
|-------------|---------------------|

**9.34.4.12 operator=()** [2/2]

```
template<typename Network = UNetwork<>>
Encoder& LinkPred::Encoder< Network >::operator= (
    Encoder< Network > const & that ) [default]
```

Copy assignment operator.

## Parameters

|             |                     |
|-------------|---------------------|
| <i>that</i> | The object to copy. |
|-------------|---------------------|

**9.34.4.13 setDim()**

```
template<typename Network = UNetwork<>>
void LinkPred::Encoder< Network >::setDim (
    int dim ) [inline]
```

Set the dimension of the embedding (node embedding).

## Parameters

|            |                                                  |
|------------|--------------------------------------------------|
| <i>dim</i> | The dimension of the embedding (node embedding). |
|------------|--------------------------------------------------|

**9.34.4.14 setName()**

```
template<typename Network = UNetwork<>>
void LinkPred::Encoder< Network >::setName (
    const std::string & name ) [inline]
```

Set the name of the encoder.

## Parameters

|             |                              |
|-------------|------------------------------|
| <i>name</i> | The new name of the encoder. |
|-------------|------------------------------|

#### 9.34.4.15 setWeightMap()

```
template<typename Network = UNetwork<>>
virtual void LinkPred::Encoder< Network >::setWeightMap (
    const WeightMapSP & weightMap ) [inline], [virtual]
```

Set The edge weight map.

##### Parameters

|                  |                      |
|------------------|----------------------|
| <i>weightMap</i> | The edge weight map. |
|------------------|----------------------|

Reimplemented in [LinkPred::Node2Vec< Network >](#), [LinkPred::DeepWalk< Network >](#), [LinkPred::MatFact< Network >](#), and [LinkPred::HMSM< Network >](#).

The documentation for this class was generated from the following file:

- include/linkpred/graphalg/encoders/[encoder.hpp](#)

## 9.35 LinkPred::Simp::Evaluator::Factory::ESMParams Struct Reference

Parameters of ESM.

```
#include <evaluator.hpp>
```

### Public Attributes

- std::string [encoderName](#) = "N2V"
- std::string [simMeasureName](#) = "L2"
- int [dim](#) = 0
- long int [seed](#) = 0

#### 9.35.1 Detailed Description

Parameters of ESM.

#### 9.35.2 Member Data Documentation

##### 9.35.2.1 dim

```
int LinkPred::Simp::Evaluator::Factory::ESMParams::dim = 0
```

The dimension of the embedding space. If set to zero, the default value is used (the default dimension depends on the encoder).

### 9.35.2.2 encoderName

```
std::string LinkPred::Simp::Evaluator::Factory::ESMPParams::encoderName = "N2V"
```

The name of the encoder. Possible values are: DPW ([DeepWalk](#)), [HMSM](#) (Hidden Metric Space Model), LVS ([LargeVis](#)), LEM (Laplacian Eigenmaps), LIN ([LINE](#)), LLE (Locally Linear Embedding), MFC (Matrix Factorization) and N2V ([Node2Vec](#)).

### 9.35.2.3 seed

```
long int LinkPred::Simp::Evaluator::Factory::ESMPParams::seed = 0
```

Seed of the random number generator.

### 9.35.2.4 simMeasureName

```
std::string LinkPred::Simp::Evaluator::Factory::ESMPParams::simMeasureName = "L2"
```

The name of the similarity measure. Possible values are: CSM (cosine similarity), DTP (dot product), L1 (L1 similarity), L2 (L2 similarity), PRS ([Pearson](#) similarity).

The documentation for this struct was generated from the following file:

- [include/linkpred/simp/evaluator.hpp](#)

## 9.36 LinkPred::ESPDistCalculator< Network, DistType, NbHopsType > Class Template Reference

Exact shortest path distance calculator.

```
#include <netdistcalculator.hpp>
```

Inheritance diagram for LinkPred::ESPDistCalculator< Network, DistType, NbHopsType >:

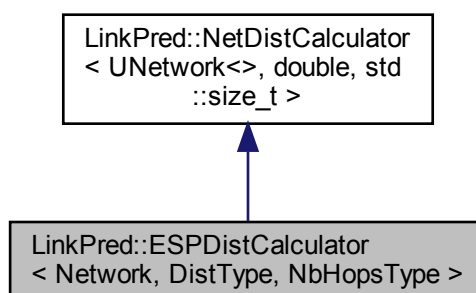



Collaboration diagram for LinkPred::ESPDistCalculator< Network, DistType, NbHopsType >:

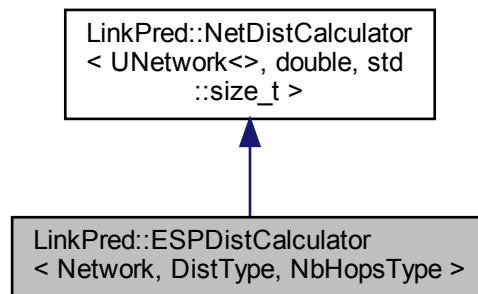

## Public Types

- using [LengthMapIdType](#) = typename [NetDistCalculator](#)< Network, DistType, NbHopsType >::LengthMapIdType
- using [NetworkSP](#) = typename [NetDistCalculator](#)< Network, DistType, NbHopsType >::NetworkSP
- using [NodeID](#) = typename [NetDistCalculator](#)< Network, DistType, NbHopsType >::NodeID
- using [Label](#) = typename [NetDistCalculator](#)< Network, DistType, NbHopsType >::Label
- using [Edge](#) = typename [NetDistCalculator](#)< Network, DistType, NbHopsType >::Edge
- using [NodeDistMap](#) = typename [NetDistCalculator](#)< Network, DistType, NbHopsType >::NodeDistMap
- using [NodeDistMapSP](#) = typename [NetDistCalculator](#)< Network, DistType, NbHopsType >::NodeDistMapSP
- using [EdgeLengthMap](#) = typename [NetDistCalculator](#)< Network, DistType, NbHopsType >::EdgeLengthMap
- using [EdgeLengthMapSP](#) = typename [NetDistCalculator](#)< Network, DistType, NbHopsType >::EdgeLengthMapSP

## Public Member Functions

- [ESPDistCalculator](#) ([Dijkstra](#)< Network, DistType, NbHopsType > &dijkstra, [EdgeLengthMapSP](#) length, [CacheLevel](#) cacheLevel=CacheLevel::NetworkCache)
- [ESPDistCalculator](#) ([ESPDistCalculator](#) const &that)=default
- [ESPDistCalculator](#) & operator= ([ESPDistCalculator](#) const &that)=default
- [ESPDistCalculator](#) ([ESPDistCalculator](#) &&that)=default
- [ESPDistCalculator](#) & operator= ([ESPDistCalculator](#) &&that)=default
- virtual std::pair< DistType, NbHopsType > [getDist](#) ([NodeID](#) const &i, [NodeID](#) const &j)
- virtual [NodeDistMapSP](#) [getDist](#) ([NodeID](#) const &i)
- virtual std::pair< DistType, NbHopsType > [getIndDist](#) ([NodeID](#) const &i, [NodeID](#) const &j)
- std::size\_t [getCacheHits](#) () const
- std::size\_t [getCacheMiss](#) () const
- virtual ~[ESPDistCalculator](#) ()

### 9.36.1 Detailed Description

```
template<typename Network = UNetwork<>, typename DistType = double, typename NbHopsType = std::size_t>
class LinkPred::ESPDistCalculator< Network, DistType, NbHopsType >
```

Exact shortest path distance calculator.

This class offers an additional layer over [Dijkstra](#) which provides memory management functionalities by caching computed distances.

## Template Parameters

|                   |                                                               |
|-------------------|---------------------------------------------------------------|
| <i>Network</i>    | The network type.                                             |
| <i>DistType</i>   | The distance type (can be an integer or floating point type). |
| <i>NbHopsType</i> | The type of the number of hops (must be an integer type).     |

## 9.36.2 Member Typedef Documentation

### 9.36.2.1 Edge

```
template<typename Network = UNetwork<>, typename DistType = double, typename NbHopsType =
std::size_t>
using LinkPred::ESPDistCalculator< Network, DistType, NbHopsType >::Edge = typename NetDistCalculator<Network,
DistType, NbHopsType>::Edge
```

Edge type.

### 9.36.2.2 EdgeLengthMap

```
template<typename Network = UNetwork<>, typename DistType = double, typename NbHopsType =
std::size_t>
using LinkPred::ESPDistCalculator< Network, DistType, NbHopsType >::EdgeLengthMap = typename
NetDistCalculator<Network, DistType, NbHopsType>::EdgeLengthMap
```

Edge length map.

### 9.36.2.3 EdgeLengthMapSP

```
template<typename Network = UNetwork<>, typename DistType = double, typename NbHopsType =
std::size_t>
using LinkPred::ESPDistCalculator< Network, DistType, NbHopsType >::EdgeLengthMapSP = typename
NetDistCalculator<Network, DistType, NbHopsType>::EdgeLengthMapSP
```

Shared pointer to an edge length map.

### 9.36.2.4 Label

```
template<typename Network = UNetwork<>, typename DistType = double, typename NbHopsType =
std::size_t>
using LinkPred::ESPDistCalculator< Network, DistType, NbHopsType >::Label = typename NetDistCalculator<Network,
DistType, NbHopsType>::Label
```

Nodes label type.

### 9.36.2.5 LengthMapIdType

```
template<typename Network = UNetwork<>, typename DistType = double, typename NbHopsType =
std::size_t>
using LinkPred::ESPDistCalculator< Network, DistType, NbHopsType >::LengthMapIdType = typename
NetDistCalculator<Network, DistType, NbHopsType>::LengthMapIdType
```

Length map ID type.

### 9.36.2.6 NetworkSP

```
template<typename Network = UNetwork<>, typename DistType = double, typename NbHopsType =
std::size_t>
using LinkPred::ESPDistCalculator< Network, DistType, NbHopsType >::NetworkSP = typename
NetDistCalculator<Network, DistType, NbHopsType>::NetworkSP
```

Shared pointer to network.

### 9.36.2.7 NodeDistMap

```
template<typename Network = UNetwork<>, typename DistType = double, typename NbHopsType =
std::size_t>
using LinkPred::ESPDistCalculator< Network, DistType, NbHopsType >::NodeDistMap = typename
NetDistCalculator<Network, DistType, NbHopsType>::NodeDistMap
```

Distance map.

### 9.36.2.8 NodeDistMapSP

```
template<typename Network = UNetwork<>, typename DistType = double, typename NbHopsType =
std::size_t>
using LinkPred::ESPDistCalculator< Network, DistType, NbHopsType >::NodeDistMapSP = typename
NetDistCalculator<Network, DistType, NbHopsType>::NodeDistMapSP
```

Shared pointer to a distance map.

### 9.36.2.9 NodeID

```
template<typename Network = UNetwork<>, typename DistType = double, typename NbHopsType =
std::size_t>
using LinkPred::ESPDistCalculator< Network, DistType, NbHopsType >::NodeID = typename NetDistCalculator<Network,
DistType, NbHopsType>::NodeID
```

Nodes ID type.

## 9.36.3 Constructor & Destructor Documentation

### 9.36.3.1 ESPDistCalculator() [1/3]

```
template<typename Network = UNetwork<>, typename DistType = double, typename NbHopsType =
std::size_t>
LinkPred::ESPDistCalculator< Network, DistType, NbHopsType >::ESPDistCalculator (
    Dijkstra< Network, DistType, NbHopsType > & dijkstra,
    EdgeLengthMapSP length,
    CacheLevel cacheLevel = CacheLevel::NetworkCache ) [inline]
```

Constructor.

#### Parameters

|                   |                                              |
|-------------------|----------------------------------------------|
| <i>dijkstra</i>   | A <a href="#">Dijkstra</a> algorithm object. |
| <i>length</i>     | The length map.                              |
| <i>cacheLevel</i> | The cache level.                             |

### 9.36.3.2 ESPDistCalculator() [2/3]

```
template<typename Network = UNetwork<>, typename DistType = double, typename NbHopsType =
std::size_t>
LinkPred::ESPDistCalculator< Network, DistType, NbHopsType >::ESPDistCalculator (
    ESPDistCalculator< Network, DistType, NbHopsType > const & that ) [default]
```

Copy constructor.

#### Parameters

|             |                     |
|-------------|---------------------|
| <i>that</i> | The object to copy. |
|-------------|---------------------|

### 9.36.3.3 ESPDistCalculator() [3/3]

```
template<typename Network = UNetwork<>, typename DistType = double, typename NbHopsType =
std::size_t>
LinkPred::ESPDistCalculator< Network, DistType, NbHopsType >::ESPDistCalculator (
    ESPDistCalculator< Network, DistType, NbHopsType > && that ) [default]
```

Move constructor.

#### Parameters

|             |                     |
|-------------|---------------------|
| <i>that</i> | The object to move. |
|-------------|---------------------|

### 9.36.3.4 ~ESPDistCalculator()

```
template<typename Network = UNetwork<>, typename DistType = double, typename NbHopsType =
std::size_t>
virtual LinkPred::ESPDistCalculator< Network, DistType, NbHopsType >::~~ESPDistCalculator ( )
[inline], [virtual]
```

Destructor.

## 9.36.4 Member Function Documentation

### 9.36.4.1 `getCacheHits()`

```
template<typename Network = UNetwork<>, typename DistType = double, typename NbHopsType =
std::size_t>
std::size_t LinkPred::ESPDistCalculator< Network, DistType, NbHopsType >::getCacheHits ( )
const [inline]
```

#### Returns

The number of cache hits.

### 9.36.4.2 `getCacheMiss()`

```
template<typename Network = UNetwork<>, typename DistType = double, typename NbHopsType =
std::size_t>
std::size_t LinkPred::ESPDistCalculator< Network, DistType, NbHopsType >::getCacheMiss ( )
const [inline]
```

#### Returns

The number of cache misses.

### 9.36.4.3 `getDist()` [1/2]

```
template<typename Network = UNetwork<>, typename DistType = double, typename NbHopsType =
std::size_t>
virtual NodeDistMapSP LinkPred::ESPDistCalculator< Network, DistType, NbHopsType >::getDist (
    NodeID const & i ) [virtual]
```

#### Parameters

|          |              |
|----------|--------------|
| <i>i</i> | Source node. |
|----------|--------------|

#### Returns

The distance from *i* to all other nodes.

**9.36.4.4 getDist() [2/2]**

```
template<typename Network = UNetwork<>, typename DistType = double, typename NbHopsType =
std::size_t>
virtual std::pair<DistType, NbHopsType> LinkPred::ESPDistCalculator< Network, DistType, NbHopsType >::getDist (
    NodeID const & i,
    NodeID const & j ) [virtual]
```

**Parameters**

|          |                           |
|----------|---------------------------|
| <i>i</i> | Index of the source node. |
| <i>j</i> | Index of the end node.    |

**Returns**

The distance between i and j.

**9.36.4.5 getIndDist()**

```
template<typename Network = UNetwork<>, typename DistType = double, typename NbHopsType =
std::size_t>
virtual std::pair<DistType, NbHopsType> LinkPred::ESPDistCalculator< Network, DistType, NbHopsType >::getIndDist (
    NodeID const & i,
    NodeID const & j ) [virtual]
```

**Parameters**

|          |                           |
|----------|---------------------------|
| <i>i</i> | Index of the source node. |
| <i>j</i> | Index of the end node.    |

**Returns**

The distance between i and j ignoring the edge between i and j.

**9.36.4.6 operator=() [1/2]**

```
template<typename Network = UNetwork<>, typename DistType = double, typename NbHopsType =
std::size_t>
ESPDistCalculator& LinkPred::ESPDistCalculator< Network, DistType, NbHopsType >::operator= (
    ESPDistCalculator< Network, DistType, NbHopsType > && that ) [default]
```

Move assignment operator.

## Parameters

|             |                     |
|-------------|---------------------|
| <i>that</i> | The object to move. |
|-------------|---------------------|

**9.36.4.7 operator=()** [2/2]

```
template<typename Network = UNetwork<>, typename DistType = double, typename NbHopsType =
std::size_t>
ESPDistCalculator& LinkPred::ESPDistCalculator< Network, DistType, NbHopsType >::operator= (
    ESPDistCalculator< Network, DistType, NbHopsType > const & that ) [default]
```

Copy assignment operator.

## Parameters

|             |                     |
|-------------|---------------------|
| <i>that</i> | The object to copy. |
|-------------|---------------------|

The documentation for this class was generated from the following file:

- [include/linkpred/graphalg/shortestpaths/netdistcalculator.hpp](#)

## 9.37 LinkPred::ESPDsimCalculator< Network, DsimType, NbHopsType > > Class Template Reference

Exact shortest path dissimilarity calculator.

```
#include <netdistcalculator.hpp>
```

Inheritance diagram for LinkPred::ESPDsimCalculator< Network, DsimType, NbHopsType >:

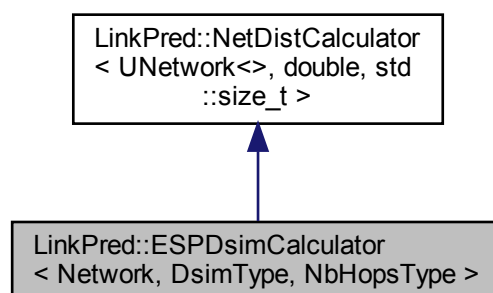



Collaboration diagram for LinkPred::ESPDsimCalculator< Network, DsimType, NbHopsType >:

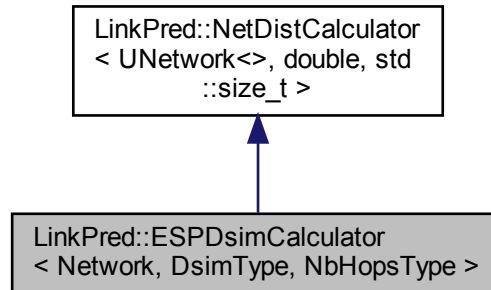

## Public Types

- using [LengthMapIdType](#) = typename [NetDistCalculator](#)< Network, DsimType, NbHopsType >::LengthMapIdType
- using [NetworkSP](#) = typename [NetDistCalculator](#)< Network, DsimType, NbHopsType >::NetworkSP
- using [NodeId](#) = typename [NetDistCalculator](#)< Network, DsimType, NbHopsType >::NodeId
- using [Label](#) = typename [NetDistCalculator](#)< Network, DsimType, NbHopsType >::Label
- using [Edge](#) = typename [NetDistCalculator](#)< Network, DsimType, NbHopsType >::Edge
- using [NodeDsimMap](#) = typename [NetDistCalculator](#)< Network, DsimType, NbHopsType >::NodeDsimMap
- using [NodeDsimMapSP](#) = typename [NetDistCalculator](#)< Network, DsimType, NbHopsType >::NodeDsimMapSP
- using [EdgeLengthMap](#) = typename [NetDistCalculator](#)< Network, DsimType, NbHopsType >::EdgeLengthMap
- using [EdgeLengthMapSP](#) = typename [NetDistCalculator](#)< Network, DsimType, NbHopsType >::EdgeLengthMapSP

## Public Member Functions

- [ESPDsimCalculator](#) ([Dijkstra](#)< Network, DsimType, NbHopsType > &dijkstra, [EdgeLengthMapSP](#) length, [CacheLevel](#) cacheLevel=CacheLevel::NodeCache)
- [ESPDsimCalculator](#) ([ESPDsimCalculator](#) const &that)=default
- [ESPDsimCalculator](#) & operator= ([ESPDsimCalculator](#) const &that)=default
- [ESPDsimCalculator](#) ([ESPDsimCalculator](#) &&that)=default
- [ESPDsimCalculator](#) & operator= ([ESPDsimCalculator](#) &&that)=default
- virtual std::pair< DsimType, NbHopsType > [getDist](#) ([NodeId](#) const &i, [NodeId](#) const &j)
- virtual std::pair< DsimType, NbHopsType > [getIndDist](#) ([NodeId](#) const &i, [NodeId](#) const &j)
- virtual [NodeDsimMapSP](#) [getDist](#) ([NodeId](#) const &i)
- virtual [~ESPDsimCalculator](#) ()

### 9.37.1 Detailed Description

```
template<typename Network = UNetwork<>, typename DsimType = double, typename NbHopsType = std::size_t>
class LinkPred::ESPDsimCalculator< Network, DsimType, NbHopsType >
```

Exact shortest path dissimilarity calculator.

## Template Parameters

|                   |                                                               |
|-------------------|---------------------------------------------------------------|
| <i>Network</i>    | The network type.                                             |
| <i>DistType</i>   | The distance type (can be an integer or floating point type). |
| <i>NbHopsType</i> | The type of the number of hops (must be an integer type).     |

## 9.37.2 Member Typedef Documentation

### 9.37.2.1 Edge

```
template<typename Network = UNetwork<>, typename DsimType = double, typename NbHopsType =
std::size_t>
using LinkPred::ESPDsimCalculator< Network, DsimType, NbHopsType >::Edge = typename NetDistCalculator<Network,
DsimType, NbHopsType>::Edge
```

Edge type.

### 9.37.2.2 EdgeLengthMap

```
template<typename Network = UNetwork<>, typename DsimType = double, typename NbHopsType =
std::size_t>
using LinkPred::ESPDsimCalculator< Network, DsimType, NbHopsType >::EdgeLengthMap = typename
NetDistCalculator<Network, DsimType, NbHopsType>::EdgeLengthMap
```

Edge length map.

### 9.37.2.3 EdgeLengthMapSP

```
template<typename Network = UNetwork<>, typename DsimType = double, typename NbHopsType =
std::size_t>
using LinkPred::ESPDsimCalculator< Network, DsimType, NbHopsType >::EdgeLengthMapSP = typename
NetDistCalculator<Network, DsimType, NbHopsType>::EdgeLengthMapSP
```

Shared pointer to an edge length map.

### 9.37.2.4 Label

```
template<typename Network = UNetwork<>, typename DsimType = double, typename NbHopsType =
std::size_t>
using LinkPred::ESPDsimCalculator< Network, DsimType, NbHopsType >::Label = typename NetDistCalculator<Network,
DsimType, NbHopsType>::Label
```

Nodes label type.

### 9.37.2.5 LengthMapIdType

```
template<typename Network = UNetwork<>, typename DsimType = double, typename NbHopsType =
std::size_t>
using LinkPred::ESPDsimCalculator< Network, DsimType, NbHopsType >::LengthMapIdType = typename
NetDistCalculator<Network, DsimType, NbHopsType>::LengthMapIdType
```

Length map ID type.

### 9.37.2.6 NetworkSP

```
template<typename Network = UNetwork<>, typename DsimType = double, typename NbHopsType =
std::size_t>
using LinkPred::ESPDsimCalculator< Network, DsimType, NbHopsType >::NetworkSP = typename
NetDistCalculator<Network, DsimType, NbHopsType>::NetworkSP
```

Shared pointer to network.

### 9.37.2.7 NodeDsimMap

```
template<typename Network = UNetwork<>, typename DsimType = double, typename NbHopsType =
std::size_t>
using LinkPred::ESPDsimCalculator< Network, DsimType, NbHopsType >::NodeDsimMap = typename
NetDistCalculator<Network, DsimType, NbHopsType>::NodeDistMap
```

Dissimilarity map.

### 9.37.2.8 NodeDsimMapSP

```
template<typename Network = UNetwork<>, typename DsimType = double, typename NbHopsType =
std::size_t>
using LinkPred::ESPDsimCalculator< Network, DsimType, NbHopsType >::NodeDsimMapSP = typename
NetDistCalculator<Network, DsimType, NbHopsType>::NodeDistMapSP
```

Shared pointer to a Dissimilarity map.

### 9.37.2.9 NodeID

```
template<typename Network = UNetwork<>, typename DsimType = double, typename NbHopsType =
std::size_t>
using LinkPred::ESPDsimCalculator< Network, DsimType, NbHopsType >::NodeID = typename NetDistCalculator<Network,
DsimType, NbHopsType>::NodeID
```

Nodes ID type.

## 9.37.3 Constructor & Destructor Documentation

### 9.37.3.1 ESPDsimCalculator() [1/3]

```
template<typename Network = UNetwork<>, typename DsimType = double, typename NbHopsType =
std::size_t>
LinkPred::ESPDsimCalculator< Network, DsimType, NbHopsType >::ESPDsimCalculator (
    Dijkstra< Network, DsimType, NbHopsType > & dijkstra,
    EdgeLengthMapSP length,
    CacheLevel cacheLevel = CacheLevel::NodeCache ) [inline]
```

Constructor.

## Parameters

|                   |                                              |
|-------------------|----------------------------------------------|
| <i>dijkstra</i>   | A <a href="#">Dijkstra</a> algorithm object. |
| <i>length</i>     | The length map.                              |
| <i>cacheLevel</i> | The cache level.                             |

## 9.37.3.2 ESPDsimCalculator() [2/3]

```
template<typename Network = UNetwork<>, typename DsimType = double, typename NbHopsType =
std::size_t>
LinkPred::ESPDsimCalculator< Network, DsimType, NbHopsType >::ESPDsimCalculator (
    ESPDsimCalculator< Network, DsimType, NbHopsType > const & that ) [default]
```

Copy constructor.

## Parameters

|             |                     |
|-------------|---------------------|
| <i>that</i> | The object to copy. |
|-------------|---------------------|

## 9.37.3.3 ESPDsimCalculator() [3/3]

```
template<typename Network = UNetwork<>, typename DsimType = double, typename NbHopsType =
std::size_t>
LinkPred::ESPDsimCalculator< Network, DsimType, NbHopsType >::ESPDsimCalculator (
    ESPDsimCalculator< Network, DsimType, NbHopsType > && that ) [default]
```

Move constructor.

## Parameters

|             |                     |
|-------------|---------------------|
| <i>that</i> | The object to move. |
|-------------|---------------------|

## 9.37.3.4 ~ESPDsimCalculator()

```
template<typename Network = UNetwork<>, typename DsimType = double, typename NbHopsType =
std::size_t>
virtual LinkPred::ESPDsimCalculator< Network, DsimType, NbHopsType >::~~ESPDsimCalculator ( )
[inline], [virtual]
```

Destructor.

## 9.37.4 Member Function Documentation

### 9.37.4.1 `getDist()` [1/2]

```
template<typename Network = UNetwork<>, typename DsimType = double, typename NbHopsType =
std::size_t>
virtual NodeDsimMapSP LinkPred::ESPDsimCalculator< Network, DsimType, NbHopsType >::getDist (
    NodeID const & i ) [virtual]
```

#### Parameters

|          |              |
|----------|--------------|
| <i>i</i> | Source node. |
|----------|--------------|

#### Returns

The distance from *i* to all other nodes.

### 9.37.4.2 `getDist()` [2/2]

```
template<typename Network = UNetwork<>, typename DsimType = double, typename NbHopsType =
std::size_t>
virtual std::pair<DsimType, NbHopsType> LinkPred::ESPDsimCalculator< Network, DsimType, Nb↔
HopsType >::getDist (
    NodeID const & i,
    NodeID const & j ) [virtual]
```

#### Parameters

|          |                           |
|----------|---------------------------|
| <i>i</i> | Index of the source node. |
| <i>j</i> | Index of the end node.    |

#### Returns

The distance between *i* and *j*.

### 9.37.4.3 `getIndDist()`

```
template<typename Network = UNetwork<>, typename DsimType = double, typename NbHopsType =
std::size_t>
virtual std::pair<DsimType, NbHopsType> LinkPred::ESPDsimCalculator< Network, DsimType, Nb↔
HopsType >::getIndDist (
    NodeID const & i,
    NodeID const & j ) [virtual]
```

## Parameters

|          |                           |
|----------|---------------------------|
| <i>i</i> | Index of the source node. |
| <i>j</i> | Index of the end node.    |

## Returns

The distance between *i* and *j* ignoring the edge between *i* and *j*.

## 9.37.4.4 operator=() [1/2]

```
template<typename Network = UNetwork<>, typename DsimType = double, typename NbHopsType =
std::size_t>
ESPDSimCalculator& LinkPred::ESPDSimCalculator< Network, DsimType, NbHopsType >::operator= (
    ESPDSimCalculator< Network, DsimType, NbHopsType > && that ) [default]
```

Move assignment operator.

## Parameters

|             |                     |
|-------------|---------------------|
| <i>that</i> | The object to move. |
|-------------|---------------------|

## 9.37.4.5 operator=() [2/2]

```
template<typename Network = UNetwork<>, typename DsimType = double, typename NbHopsType =
std::size_t>
ESPDSimCalculator& LinkPred::ESPDSimCalculator< Network, DsimType, NbHopsType >::operator= (
    ESPDSimCalculator< Network, DsimType, NbHopsType > const & that ) [default]
```

Copy assignment operator.

## Parameters

|             |                     |
|-------------|---------------------|
| <i>that</i> | The object to copy. |
|-------------|---------------------|

The documentation for this class was generated from the following file:

- include/linkpred/graphalg/shortestpaths/[netdistcalculator.hpp](#)

## 9.38 LinkPred::ESPIndSimlCalculator< Network, DistType, NbHopsType > Class Template Reference

Exact shortest path distance calculator.

```
#include <netdistcalculator.hpp>
```

Inheritance diagram for LinkPred::ESPIndSimlCalculator< Network, DistType, NbHopsType >:

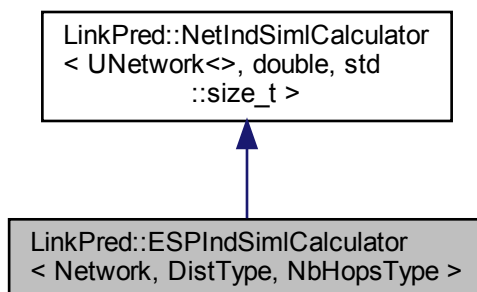

Collaboration diagram for LinkPred::ESPIndSimlCalculator< Network, DistType, NbHopsType >:

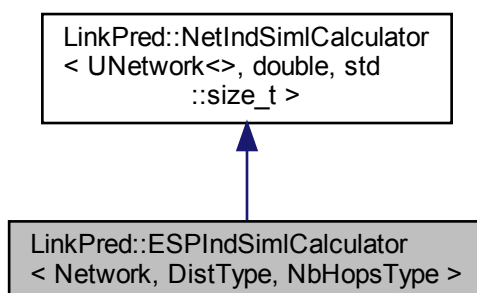

## Public Types

- using [LengthMapIdType](#) = typename [NetIndSimlCalculator](#)< Network, DistType, NbHopsType >↔  
::LengthMapIdType
- using [NetworkSP](#) = typename [NetIndSimlCalculator](#)< Network, DistType, NbHopsType >::NetworkSP
- using [NodeId](#) = typename [NetIndSimlCalculator](#)< Network, DistType, NbHopsType >::NodeId
- using [Label](#) = typename [NetIndSimlCalculator](#)< Network, DistType, NbHopsType >::Label
- using [Edge](#) = typename [NetIndSimlCalculator](#)< Network, DistType, NbHopsType >::Edge
- using [NodeDistMap](#) = typename Network::template NodeMap< std::pair< DistType, NbHopsType > >
- using [NodeDistMapSP](#) = typename Network::template NodeMapSP< std::pair< DistType, NbHopsType > >
- using [EdgeLengthMap](#) = typename [NetIndSimlCalculator](#)< Network, DistType, NbHopsType >↔  
::EdgeLengthMap
- using [EdgeLengthMapSP](#) = typename [NetIndSimlCalculator](#)< Network, DistType, NbHopsType >↔  
::EdgeLengthMapSP



## Public Member Functions

- [ESPIndSimlCalculator](#) ([Dijkstra](#)< Network, DistType, NbHopsType > &dijkstra, [EdgeLengthMapSP](#) length)
- [ESPIndSimlCalculator](#) ([ESPIndSimlCalculator](#) const &that)=default
- [ESPIndSimlCalculator](#) & operator= ([ESPIndSimlCalculator](#) const &that)=default
- [ESPIndSimlCalculator](#) ([ESPIndSimlCalculator](#) &&that)=default
- [ESPIndSimlCalculator](#) & operator= ([ESPIndSimlCalculator](#) &&that)=default
- virtual std::tuple< DistType, DistType, NbHopsType > [getIndSiml](#) ([NodeID](#) const &i, [NodeID](#) const &j)
- virtual std::tuple< DistType, DistType, NbHopsType > [getDirIndSiml](#) ([NodeID](#) const &i, [NodeID](#) const &j)
- virtual [~ESPIndSimlCalculator](#) ()

### 9.38.1 Detailed Description

```
template<typename Network = UNetwork<>, typename DistType = double, typename NbHopsType = std::size_t>
class LinkPred::ESPIndSimlCalculator< Network, DistType, NbHopsType >
```

Exact shortest path distance calculator.

This class offers an additional layer over [Dijkstra](#) which provides memory management functionalities by caching computed distances.

#### Template Parameters

|                   |                                                               |
|-------------------|---------------------------------------------------------------|
| <i>Network</i>    | The network type.                                             |
| <i>DistType</i>   | The distance type (can be an integer or floating point type). |
| <i>NbHopsType</i> | The type of the number of hops (must be an integer type).     |

### 9.38.2 Member Typedef Documentation

#### 9.38.2.1 Edge

```
template<typename Network = UNetwork<>, typename DistType = double, typename NbHopsType =
std::size_t>
using LinkPred::ESPIndSimlCalculator< Network, DistType, NbHopsType >::Edge = typename NetIndSimlCalculator<
DistType, NbHopsType>::Edge
```

Edge type.

#### 9.38.2.2 EdgeLengthMap

```
template<typename Network = UNetwork<>, typename DistType = double, typename NbHopsType =
std::size_t>
using LinkPred::ESPIndSimlCalculator< Network, DistType, NbHopsType >::EdgeLengthMap = typename
NetIndSimlCalculator<Network, DistType, NbHopsType>::EdgeLengthMap
```

Edge length map.

### 9.38.2.3 EdgeLengthMapSP

```
template<typename Network = UNetwork<>, typename DistType = double, typename NbHopsType =
std::size_t>
using LinkPred::ESPIndSimlCalculator< Network, DistType, NbHopsType >::EdgeLengthMapSP =
typename NetIndSimlCalculator<Network, DistType, NbHopsType>::EdgeLengthMapSP
```

Shared pointer to an edge length map.

### 9.38.2.4 Label

```
template<typename Network = UNetwork<>, typename DistType = double, typename NbHopsType =
std::size_t>
using LinkPred::ESPIndSimlCalculator< Network, DistType, NbHopsType >::Label = typename NetIndSimlCalculator<
DistType, NbHopsType>::Label
```

Nodes label type.

### 9.38.2.5 LengthMapIdType

```
template<typename Network = UNetwork<>, typename DistType = double, typename NbHopsType =
std::size_t>
using LinkPred::ESPIndSimlCalculator< Network, DistType, NbHopsType >::LengthMapIdType =
typename NetIndSimlCalculator<Network, DistType, NbHopsType>::LengthMapIdType
```

Length map ID type.

### 9.38.2.6 NetworkSP

```
template<typename Network = UNetwork<>, typename DistType = double, typename NbHopsType =
std::size_t>
using LinkPred::ESPIndSimlCalculator< Network, DistType, NbHopsType >::NetworkSP = typename
NetIndSimlCalculator<Network, DistType, NbHopsType>::NetworkSP
```

Shared pointer to network.

### 9.38.2.7 NodeDistMap

```
template<typename Network = UNetwork<>, typename DistType = double, typename NbHopsType =
std::size_t>
using LinkPred::ESPIndSimlCalculator< Network, DistType, NbHopsType >::NodeDistMap = typename
Network::template NodeMap<std::pair<DistType, NbHopsType> >
```

Distance map.

### 9.38.2.8 NodeDistMapSP

```
template<typename Network = UNetwork<>, typename DistType = double, typename NbHopsType =
std::size_t>
using LinkPred::ESPIndSimlCalculator< Network, DistType, NbHopsType >::NodeDistMapSP = typename
Network::template NodeMapSP<std::pair<DistType, NbHopsType> >
```

Shared pointer to a distance map.

### 9.38.2.9 NodeID

```
template<typename Network = UNetwork<>, typename DistType = double, typename NbHopsType =
std::size_t>
using LinkPred::ESPIndSimlCalculator< Network, DistType, NbHopsType >::NodeID = typename
NetIndSimlCalculator<Network, DistType, NbHopsType>::NodeID
```

Nodes ID type.

## 9.38.3 Constructor & Destructor Documentation

### 9.38.3.1 ESPIndSimlCalculator() [1/3]

```
template<typename Network = UNetwork<>, typename DistType = double, typename NbHopsType =
std::size_t>
LinkPred::ESPIndSimlCalculator< Network, DistType, NbHopsType >::ESPIndSimlCalculator (
    Dijkstra< Network, DistType, NbHopsType > & dijkstra,
    EdgeLengthMapSP length ) [inline]
```

Constructor.

Parameters

|                 |                                              |
|-----------------|----------------------------------------------|
| <i>dijkstra</i> | A <a href="#">Dijkstra</a> algorithm object. |
| <i>length</i>   | The length map.                              |

### 9.38.3.2 ESPIndSimlCalculator() [2/3]

```
template<typename Network = UNetwork<>, typename DistType = double, typename NbHopsType =
std::size_t>
LinkPred::ESPIndSimlCalculator< Network, DistType, NbHopsType >::ESPIndSimlCalculator (
    ESPIndSimlCalculator< Network, DistType, NbHopsType > const & that ) [default]
```

Copy constructor.

Parameters

|             |                     |
|-------------|---------------------|
| <i>that</i> | The object to copy. |
|-------------|---------------------|

### 9.38.3.3 ESPIndSimlCalculator() [3/3]

```
template<typename Network = UNetwork<>, typename DistType = double, typename NbHopsType =
std::size_t>
```

```
LinkPred::ESPIndSimlCalculator< Network, DistType, NbHopsType >::ESPIndSimlCalculator (
    ESPIndSimlCalculator< Network, DistType, NbHopsType > && that ) [default]
```

Move constructor.

#### Parameters

|             |                     |
|-------------|---------------------|
| <i>that</i> | The object to move. |
|-------------|---------------------|

### 9.38.3.4 ~ESPIndSimlCalculator()

```
template<typename Network = UNetwork<>, typename DistType = double, typename NbHopsType =
std::size_t>
virtual LinkPred::ESPIndSimlCalculator< Network, DistType, NbHopsType >::~~ESPIndSimlCalculator
( ) [inline], [virtual]
```

Destructor.

## 9.38.4 Member Function Documentation

### 9.38.4.1 getDirIndSiml()

```
template<typename Network = UNetwork<>, typename DistType = double, typename NbHopsType =
std::size_t>
virtual std::tuple<DistType, DistType, NbHopsType> LinkPred::ESPIndSimlCalculator< Network,
DistType, NbHopsType >::getDirIndSiml (
    NodeID const & i,
    NodeID const & j ) [virtual]
```

#### Parameters

|          |                           |
|----------|---------------------------|
| <i>i</i> | Index of the source node. |
| <i>j</i> | Index of the end node.    |

#### Returns

The directed similarity between *i* and *j* ignoring the edge between *i* and *j*.

### 9.38.4.2 getIndSiml()

```
template<typename Network = UNetwork<>, typename DistType = double, typename NbHopsType =
std::size_t>
```

```
virtual std::tuple<DistType, DistType, NbHopsType> LinkPred::ESPIndSimlCalculator< Network,
DistType, NbHopsType >::getIndSiml (
    NodeID const & i,
    NodeID const & j ) [virtual]
```

**Parameters**

|          |                           |
|----------|---------------------------|
| <i>i</i> | Index of the source node. |
| <i>j</i> | Index of the end node.    |

**Returns**

The similarity between i and j ignoring the edge between i and j.

**9.38.4.3 operator=() [1/2]**

```
template<typename Network = UNetwork<>, typename DistType = double, typename NbHopsType =
std::size_t>
ESPIndSimlCalculator& LinkPred::ESPIndSimlCalculator< Network, DistType, NbHopsType >::operator=
(
    ESPIndSimlCalculator< Network, DistType, NbHopsType > && that ) [default]
```

Move assignment operator.

**Parameters**

|             |                     |
|-------------|---------------------|
| <i>that</i> | The object to move. |
|-------------|---------------------|

**9.38.4.4 operator=() [2/2]**

```
template<typename Network = UNetwork<>, typename DistType = double, typename NbHopsType =
std::size_t>
ESPIndSimlCalculator& LinkPred::ESPIndSimlCalculator< Network, DistType, NbHopsType >::operator=
(
    ESPIndSimlCalculator< Network, DistType, NbHopsType > const & that ) [default]
```

Copy assignment operator.

**Parameters**

|             |                     |
|-------------|---------------------|
| <i>that</i> | The object to copy. |
|-------------|---------------------|

The documentation for this class was generated from the following file:

- [include/linkpred/graphalg/shortestpaths/netdistcalculator.hpp](#)

## 9.39 LinkPred::ESPLDistCalculator< Network, DistType, NbHopsType > Class Template Reference

Exact shortest path distance calculator with limits on the number of hops.

```
#include <netdistcalculator.hpp>
```

Inheritance diagram for LinkPred::ESPLDistCalculator< Network, DistType, NbHopsType >:

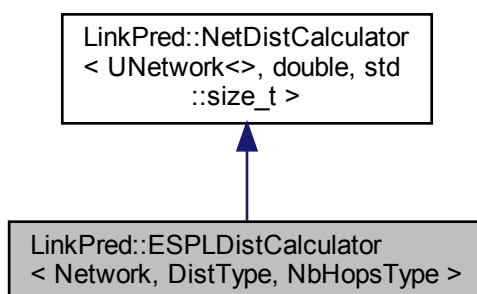

Collaboration diagram for LinkPred::ESPLDistCalculator< Network, DistType, NbHopsType >:

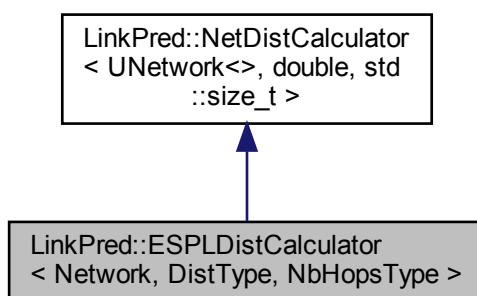

### Public Types

- using [LengthMapIdType](#) = typename [NetDistCalculator](#)< Network, DistType, NbHopsType >::LengthMapIdType
- using [NetworkSP](#) = typename [NetDistCalculator](#)< Network, DistType, NbHopsType >::NetworkSP
- using [NodeId](#) = typename [NetDistCalculator](#)< Network, DistType, NbHopsType >::NodeId
- using [Label](#) = typename [NetDistCalculator](#)< Network, DistType, NbHopsType >::Label
- using [Edge](#) = typename [NetDistCalculator](#)< Network, DistType, NbHopsType >::Edge

- using [NodeDistMap](#) = typename [NetDistCalculator](#)< Network, DistType, NbHopsType >::NodeDistMap
- using [NodeDistMapSP](#) = typename [NetDistCalculator](#)< Network, DistType, NbHopsType >::NodeDistMapSP
- using [NodeSDistMap](#) = typename Network::template NodeSMap< std::pair< DistType, NbHopsType > >
- using [NodeSDistMapSP](#) = typename Network::template NodeSMapSP< std::pair< DistType, NbHopsType > >
- using [EdgeLengthMap](#) = typename [NetDistCalculator](#)< Network, DistType, NbHopsType >::EdgeLengthMap
- using [EdgeLengthMapSP](#) = typename [NetDistCalculator](#)< Network, DistType, NbHopsType >::EdgeLengthMapSP

## Public Member Functions

- [ESPLDistCalculator](#) (Dijkstra< Network, DistType, NbHopsType > &dijkstra, [EdgeLengthMapSP](#) length, std::size\_t lim, [CacheLevel](#) cacheLevel=CacheLevel::NetworkCache)
- [ESPLDistCalculator](#) ([ESPLDistCalculator](#) const &that)=default
- [ESPLDistCalculator](#) & operator= ([ESPLDistCalculator](#) const &that)=default
- [ESPLDistCalculator](#) ([ESPLDistCalculator](#) &&that)=default
- [ESPLDistCalculator](#) & operator= ([ESPLDistCalculator](#) &&that)=default
- virtual std::pair< DistType, NbHopsType > [getDist](#) (NodeID const &i, NodeID const &j)
- virtual std::pair< DistType, NbHopsType > [getIndDist](#) (NodeID const &i, NodeID const &j)
- virtual [NodeDistMapSP](#) [getDist](#) (NodeID const &i)
- virtual [NodeSDistMapSP](#) [getSDistMap](#) (NodeID const &i)
- virtual [NodeSDistMapSP](#) [getFinDistMapNoNeighb](#) (NodeID const &srcNode)
- virtual std::pair< DistType, NbHopsType > [getDist](#) ([Edge](#) const &e)
- std::size\_t [getMaxNbNodesInCache](#) () const
- void [setMaxNbNodesInCache](#) (std::size\_t maxNbNodesInCache)
- std::size\_t [getLim](#) () const
- virtual ~ [ESPLDistCalculator](#) ()

### 9.39.1 Detailed Description

```
template<typename Network = UNetwork<>, typename DistType = double, typename NbHopsType = std::size_t>
class LinkPred::ESPLDistCalculator< Network, DistType, NbHopsType >
```

Exact shortest path distance calculator with limits on the number of hops.

This class offers an additional layer over [Dijkstra](#) which provides memory management functionalities by caching computed distances.

#### Template Parameters

|                   |                                                               |
|-------------------|---------------------------------------------------------------|
| <i>Network</i>    | The network type.                                             |
| <i>DistType</i>   | The distance type (can be an integer or floating point type). |
| <i>NbHopsType</i> | The type of the number of hops (must be an integer type).     |

### 9.39.2 Member Typedef Documentation

### 9.39.2.1 Edge

```
template<typename Network = UNetwork<>, typename DistType = double, typename NbHopsType =
std::size_t>
using LinkPred::ESPLDistCalculator< Network, DistType, NbHopsType >::Edge = typename NetDistCalculator<Network,
DistType, NbHopsType>::Edge
```

Edge type.

### 9.39.2.2 EdgeLengthMap

```
template<typename Network = UNetwork<>, typename DistType = double, typename NbHopsType =
std::size_t>
using LinkPred::ESPLDistCalculator< Network, DistType, NbHopsType >::EdgeLengthMap = typename
NetDistCalculator<Network, DistType, NbHopsType>::EdgeLengthMap
```

Edge length map.

### 9.39.2.3 EdgeLengthMapSP

```
template<typename Network = UNetwork<>, typename DistType = double, typename NbHopsType =
std::size_t>
using LinkPred::ESPLDistCalculator< Network, DistType, NbHopsType >::EdgeLengthMapSP = typename
NetDistCalculator<Network, DistType, NbHopsType>::EdgeLengthMapSP
```

Shared pointer to an edge length map.

### 9.39.2.4 Label

```
template<typename Network = UNetwork<>, typename DistType = double, typename NbHopsType =
std::size_t>
using LinkPred::ESPLDistCalculator< Network, DistType, NbHopsType >::Label = typename NetDistCalculator<Network,
DistType, NbHopsType>::Label
```

Nodes label type.

### 9.39.2.5 LengthMapIdType

```
template<typename Network = UNetwork<>, typename DistType = double, typename NbHopsType =
std::size_t>
using LinkPred::ESPLDistCalculator< Network, DistType, NbHopsType >::LengthMapIdType = typename
NetDistCalculator<Network, DistType, NbHopsType>::LengthMapIdType
```

Length map ID type.

### 9.39.2.6 NetworkSP

```
template<typename Network = UNetwork<>, typename DistType = double, typename NbHopsType =
std::size_t>
using LinkPred::ESPLDistCalculator< Network, DistType, NbHopsType >::NetworkSP = typename
NetDistCalculator<Network, DistType, NbHopsType>::NetworkSP
```

Shared pointer to network.



### 9.39.2.7 NodeDistMap

```
template<typename Network = UNetwork<>, typename DistType = double, typename NbHopsType =
std::size_t>
using LinkPred::ESPLDistCalculator< Network, DistType, NbHopsType >::NodeDistMap = typename
NetDistCalculator<Network, DistType, NbHopsType>::NodeDistMap
```

Distance map.

### 9.39.2.8 NodeDistMapSP

```
template<typename Network = UNetwork<>, typename DistType = double, typename NbHopsType =
std::size_t>
using LinkPred::ESPLDistCalculator< Network, DistType, NbHopsType >::NodeDistMapSP = typename
NetDistCalculator<Network, DistType, NbHopsType>::NodeDistMapSP
```

Shared pointer to a distance map.

### 9.39.2.9 NodeID

```
template<typename Network = UNetwork<>, typename DistType = double, typename NbHopsType =
std::size_t>
using LinkPred::ESPLDistCalculator< Network, DistType, NbHopsType >::NodeID = typename NetDistCalculator<Network,
DistType, NbHopsType>::NodeID
```

Nodes ID type.

### 9.39.2.10 NodeSDistMap

```
template<typename Network = UNetwork<>, typename DistType = double, typename NbHopsType =
std::size_t>
using LinkPred::ESPLDistCalculator< Network, DistType, NbHopsType >::NodeSDistMap = typename
Network::template NodeSMap<std::pair<DistType, NbHopsType> >
```

Distance map.

### 9.39.2.11 NodeSDistMapSP

```
template<typename Network = UNetwork<>, typename DistType = double, typename NbHopsType =
std::size_t>
using LinkPred::ESPLDistCalculator< Network, DistType, NbHopsType >::NodeSDistMapSP = typename
Network::template NodeSMapSP<std::pair<DistType, NbHopsType> >
```

Shared pointer to a distance map.

## 9.39.3 Constructor & Destructor Documentation

**9.39.3.1 ESPLDistCalculator()** [1/3]

```
template<typename Network = UNetwork<>, typename DistType = double, typename NbHopsType =
std::size_t>
LinkPred::ESPLDistCalculator< Network, DistType, NbHopsType >::ESPLDistCalculator (
    Dijkstra< Network, DistType, NbHopsType > & dijkstra,
    EdgeLengthMapSP length,
    std::size_t lim,
    CacheLevel cacheLevel = CacheLevel::NetworkCache ) [inline]
```

Constructor.

**Parameters**

|                   |                                              |
|-------------------|----------------------------------------------|
| <i>dijkstra</i>   | A <a href="#">Dijkstra</a> algorithm object. |
| <i>length</i>     | The length map.                              |
| <i>lim</i>        | Horizon limit.                               |
| <i>cacheLevel</i> | The cache level.                             |

**9.39.3.2 ESPLDistCalculator()** [2/3]

```
template<typename Network = UNetwork<>, typename DistType = double, typename NbHopsType =
std::size_t>
LinkPred::ESPLDistCalculator< Network, DistType, NbHopsType >::ESPLDistCalculator (
    ESPLDistCalculator< Network, DistType, NbHopsType > const & that ) [default]
```

Copy constructor.

**Parameters**

|             |                     |
|-------------|---------------------|
| <i>that</i> | The object to copy. |
|-------------|---------------------|

**9.39.3.3 ESPLDistCalculator()** [3/3]

```
template<typename Network = UNetwork<>, typename DistType = double, typename NbHopsType =
std::size_t>
LinkPred::ESPLDistCalculator< Network, DistType, NbHopsType >::ESPLDistCalculator (
    ESPLDistCalculator< Network, DistType, NbHopsType > && that ) [default]
```

Move constructor.

**Parameters**

|             |                     |
|-------------|---------------------|
| <i>that</i> | The object to move. |
|-------------|---------------------|

### 9.39.3.4 ~ ESPLDistCalculator()

```
template<typename Network = UNetwork<>, typename DistType = double, typename NbHopsType =
std::size_t>
virtual LinkPred::ESPLDistCalculator< Network, DistType, NbHopsType >::~ESPLDistCalculator (
) [inline], [virtual]
```

Destructor.

## 9.39.4 Member Function Documentation

### 9.39.4.1 getDist() [1/3]

```
template<typename Network = UNetwork<>, typename DistType = double, typename NbHopsType =
std::size_t>
virtual std::pair<DistType, NbHopsType> LinkPred::ESPLDistCalculator< Network, DistType, Nb↵
HopsType >::getDist (
    Edge const & e ) [inline], [virtual]
```

#### Parameters

|          |                |
|----------|----------------|
| <i>e</i> | An input edge. |
|----------|----------------|

#### Returns

The distance between start and end of *e*.

### 9.39.4.2 getDist() [2/3]

```
template<typename Network = UNetwork<>, typename DistType = double, typename NbHopsType =
std::size_t>
virtual NodeDistMapSP LinkPred::ESPLDistCalculator< Network, DistType, NbHopsType >::getDist (
    NodeID const & i ) [virtual]
```

#### Returns

The distance from *srcNode*.

#### Parameters

|          |                  |
|----------|------------------|
| <i>i</i> | The source node. |
|----------|------------------|

### 9.39.4.3 getDist() [3/3]

```
template<typename Network = UNetwork<>, typename DistType = double, typename NbHopsType =
std::size_t>
virtual std::pair<DistType, NbHopsType> LinkPred::ESPLDistCalculator< Network, DistType, NbHopsType >::getDist (
    NodeID const & i,
    NodeID const & j ) [virtual]
```

#### Parameters

|          |                           |
|----------|---------------------------|
| <i>i</i> | Index of the source node. |
| <i>j</i> | Index of the end node.    |

#### Returns

The distance between i and j.

### 9.39.4.4 getFinDistMapNoNeighb()

```
template<typename Network = UNetwork<>, typename DistType = double, typename NbHopsType =
std::size_t>
virtual NodeSDistMapSP LinkPred::ESPLDistCalculator< Network, DistType, NbHopsType >::getFinDistMapNoNeighb (
    NodeID const & srcNode ) [virtual]
```

#### Returns

A sparse distance map of nodes having finite distance to a given source node. Only nodes not connected to srcNode are considered. The node srcNode itself is also excluded.

#### Parameters

|                |                  |
|----------------|------------------|
| <i>srcNode</i> | The source node. |
|----------------|------------------|

### 9.39.4.5 getIndDist()

```
template<typename Network = UNetwork<>, typename DistType = double, typename NbHopsType =
std::size_t>
virtual std::pair<DistType, NbHopsType> LinkPred::ESPLDistCalculator< Network, DistType, NbHopsType >::getIndDist (
    NodeID const & i,
    NodeID const & j ) [inline], [virtual]
```

**Parameters**

|          |                           |
|----------|---------------------------|
| <i>i</i> | Index of the source node. |
| <i>j</i> | Index of the end node.    |

**Returns**

The distance between *i* and *j* ignoring the edge between *i* and *j*.

**9.39.4.6 getLim()**

```
template<typename Network = UNetwork<>, typename DistType = double, typename NbHopsType =
std::size_t>
std::size_t LinkPred::ESPLDistCalculator< Network, DistType, NbHopsType >::getLim ( ) const
[inline]
```

**Returns**

The limit on the number of hops.

**9.39.4.7 getMaxNbNodesInCache()**

```
template<typename Network = UNetwork<>, typename DistType = double, typename NbHopsType =
std::size_t>
std::size_t LinkPred::ESPLDistCalculator< Network, DistType, NbHopsType >::getMaxNbNodesIn←
Cache ( ) const [inline]
```

**Returns**

The maximum number of nodes allowed in cache.

**9.39.4.8 getSDistMap()**

```
template<typename Network = UNetwork<>, typename DistType = double, typename NbHopsType =
std::size_t>
virtual NodeSDistMapSP LinkPred::ESPLDistCalculator< Network, DistType, NbHopsType >::getS←
DistMap (
    NodeID const & i ) [virtual]
```

**Returns**

The sparse distance from srcNode.

## Parameters

|          |                  |
|----------|------------------|
| <i>i</i> | The source node. |
|----------|------------------|

**9.39.4.9 operator=()** [1/2]

```
template<typename Network = UNetwork<>, typename DistType = double, typename NbHopsType =
std::size_t>
ESPLDistCalculator& LinkPred::ESPLDistCalculator< Network, DistType, NbHopsType >::operator= (
    ESPLDistCalculator< Network, DistType, NbHopsType > && that ) [default]
```

Move assignment operator.

## Parameters

|             |                     |
|-------------|---------------------|
| <i>that</i> | The object to move. |
|-------------|---------------------|

**9.39.4.10 operator=()** [2/2]

```
template<typename Network = UNetwork<>, typename DistType = double, typename NbHopsType =
std::size_t>
ESPLDistCalculator& LinkPred::ESPLDistCalculator< Network, DistType, NbHopsType >::operator= (
    ESPLDistCalculator< Network, DistType, NbHopsType > const & that ) [default]
```

Copy assignment operator.

## Parameters

|             |                     |
|-------------|---------------------|
| <i>that</i> | The object to copy. |
|-------------|---------------------|

**9.39.4.11 setMaxNbNodesInCache()**

```
template<typename Network = UNetwork<>, typename DistType = double, typename NbHopsType =
std::size_t>
void LinkPred::ESPLDistCalculator< Network, DistType, NbHopsType >::setMaxNbNodesInCache (
    std::size_t maxNbNodesInCache ) [inline]
```

Set the maximum number of nodes in cache (for each node a map of distance to all other nodes is kept in memory).

## Parameters

|                          |                                                     |
|--------------------------|-----------------------------------------------------|
| <i>maxNbNodesInCache</i> | New value for the maximum number of nodes in cache. |
|--------------------------|-----------------------------------------------------|

The documentation for this class was generated from the following file:

- [include/linkpred/graphalg/shortestpaths/netdistcalculator.hpp](#)

## 9.40 LinkPred::ESPLSimlCalculator< Network, DistType, NbHopsType > Class Template Reference

Exact shortest path distance calculator.

```
#include <netdistcalculator.hpp>
```

Inheritance diagram for LinkPred::ESPLSimlCalculator< Network, DistType, NbHopsType >:

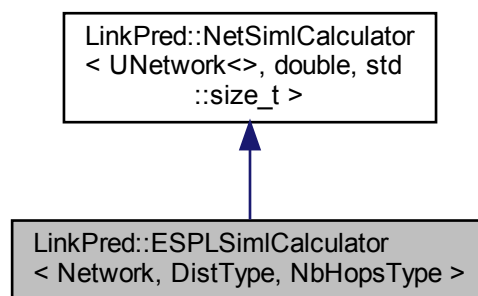

Collaboration diagram for LinkPred::ESPLSimlCalculator< Network, DistType, NbHopsType >:

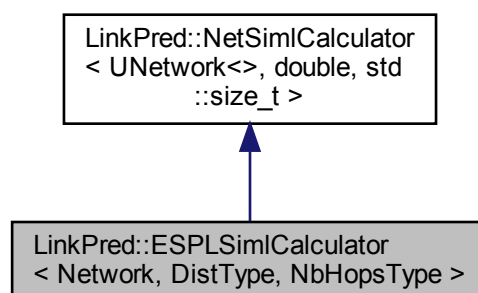

## Public Types

- using [LengthMapIdType](#) = typename [NetSimlCalculator](#)< Network, DistType, NbHopsType >::LengthMapIdType
- using [NetworkSP](#) = typename [NetSimlCalculator](#)< Network, DistType, NbHopsType >::NetworkSP
- using [NodeId](#) = typename [NetSimlCalculator](#)< Network, DistType, NbHopsType >::NodeId
- using [Label](#) = typename [NetSimlCalculator](#)< Network, DistType, NbHopsType >::Label
- using [Edge](#) = typename [NetSimlCalculator](#)< Network, DistType, NbHopsType >::Edge
- using [NodeSDistMap](#) = typename Network::template NodeSMap< std::pair< DistType, NbHopsType > >
- using [NodeSDistMapSP](#) = typename Network::template NodeSMapSP< std::pair< DistType, NbHopsType > >
- using [EdgeLengthMap](#) = typename [NetSimlCalculator](#)< Network, DistType, NbHopsType >::EdgeLengthMap
- using [EdgeLengthMapSP](#) = typename [NetSimlCalculator](#)< Network, DistType, NbHopsType >::EdgeLengthMapSP

## Public Member Functions

- [ESPLSimlCalculator](#) ([Dijkstra](#)< Network, DistType, NbHopsType > &dijkstra, [EdgeLengthMapSP](#) length, std::size\_t lim, [CacheLevel](#) cacheLevel=CacheLevel::NetworkCache)
- [ESPLSimlCalculator](#) ([ESPLSimlCalculator](#) const &that)=default
- [ESPLSimlCalculator](#) & operator= ([ESPLSimlCalculator](#) const &that)=default
- [ESPLSimlCalculator](#) ([ESPLSimlCalculator](#) &&that)=default
- [ESPLSimlCalculator](#) & operator= ([ESPLSimlCalculator](#) &&that)=default
- virtual std::tuple< DistType, DistType, NbHopsType > [getSiml](#) ([NodeId](#) const &i, [NodeId](#) const &j)
- virtual std::tuple< DistType, DistType, NbHopsType > [getDirSiml](#) ([NodeId](#) const &i, [NodeId](#) const &j)
- virtual [NodeSDistMapSP](#) [getNnzSimlMap](#) ([NodeId](#) const &srcNode)
- virtual [NodeSDistMapSP](#) [getNnzSimlMapNoNeighb](#) ([NodeId](#) const &srcNode)
- virtual std::tuple< DistType, DistType, NbHopsType > [getSiml](#) ([Edge](#) const &e)
- virtual std::tuple< DistType, DistType, NbHopsType > [getDirSiml](#) ([Edge](#) const &e)
- std::size\_t [getMaxNbNodesInCache](#) () const
- void [setMaxNbNodesInCache](#) (std::size\_t maxNbNodesInCache)
- std::size\_t [getLim](#) () const
- bool [isUseHops](#) () const
- void [setUseHops](#) (bool useHops)
- virtual ~ [ESPLSimlCalculator](#) ()

### 9.40.1 Detailed Description

```
template<typename Network = UNetwork<>, typename DistType = double, typename NbHopsType = std::size_t>
class LinkPred::ESPLSimlCalculator< Network, DistType, NbHopsType >
```

Exact shortest path distance calculator.

This class offers an additional layer over [Dijkstra](#) which provides memory management functionalities by caching computed distances.

#### Template Parameters

|                   |                                                               |
|-------------------|---------------------------------------------------------------|
| <i>Network</i>    | The network type.                                             |
| <i>DistType</i>   | The distance type (can be an integer or floating point type). |
| <i>NbHopsType</i> | The type of the number of hops (must be an integer type).     |



## 9.40.2 Member Typedef Documentation

### 9.40.2.1 Edge

```
template<typename Network = UNetwork<>, typename DistType = double, typename NbHopsType =
std::size_t>
using LinkPred::ESPLSimlCalculator< Network, DistType, NbHopsType >::Edge = typename NetSimlCalculator<Network,
DistType, NbHopsType>::Edge
```

Edge type.

### 9.40.2.2 EdgeLengthMap

```
template<typename Network = UNetwork<>, typename DistType = double, typename NbHopsType =
std::size_t>
using LinkPred::ESPLSimlCalculator< Network, DistType, NbHopsType >::EdgeLengthMap = typename
NetSimlCalculator<Network, DistType, NbHopsType>::EdgeLengthMap
```

Edge length map.

### 9.40.2.3 EdgeLengthMapSP

```
template<typename Network = UNetwork<>, typename DistType = double, typename NbHopsType =
std::size_t>
using LinkPred::ESPLSimlCalculator< Network, DistType, NbHopsType >::EdgeLengthMapSP = typename
NetSimlCalculator<Network, DistType, NbHopsType>::EdgeLengthMapSP
```

Shared pointer to an edge length map.

### 9.40.2.4 Label

```
template<typename Network = UNetwork<>, typename DistType = double, typename NbHopsType =
std::size_t>
using LinkPred::ESPLSimlCalculator< Network, DistType, NbHopsType >::Label = typename NetSimlCalculator<Network,
DistType, NbHopsType>::Label
```

Nodes label type.

### 9.40.2.5 LengthMapIdType

```
template<typename Network = UNetwork<>, typename DistType = double, typename NbHopsType =
std::size_t>
using LinkPred::ESPLSimlCalculator< Network, DistType, NbHopsType >::LengthMapIdType = typename
NetSimlCalculator<Network, DistType, NbHopsType>::LengthMapIdType
```

Length map ID type.

### 9.40.2.6 NetworkSP

```
template<typename Network = UNetwork<>, typename DistType = double, typename NbHopsType =
std::size_t>
using LinkPred::ESPLSimlCalculator< Network, DistType, NbHopsType >::NetworkSP = typename
NetSimlCalculator<Network, DistType, NbHopsType>::NetworkSP
```

Shared pointer to network.

### 9.40.2.7 NodeID

```
template<typename Network = UNetwork<>, typename DistType = double, typename NbHopsType =
std::size_t>
using LinkPred::ESPLSimlCalculator< Network, DistType, NbHopsType >::NodeID = typename NetSimlCalculator<Netw
DistType, NbHopsType>::NodeID
```

Nodes ID type.

### 9.40.2.8 NodeSDistMap

```
template<typename Network = UNetwork<>, typename DistType = double, typename NbHopsType =
std::size_t>
using LinkPred::ESPLSimlCalculator< Network, DistType, NbHopsType >::NodeSDistMap = typename
Network::template NodeSMap<std::pair<DistType, NbHopsType> >
```

Distance map.

### 9.40.2.9 NodeSDistMapSP

```
template<typename Network = UNetwork<>, typename DistType = double, typename NbHopsType =
std::size_t>
using LinkPred::ESPLSimlCalculator< Network, DistType, NbHopsType >::NodeSDistMapSP = typename
Network::template NodeSMapSP<std::pair<DistType, NbHopsType> >
```

Shared pointer to a distance map.

## 9.40.3 Constructor & Destructor Documentation

### 9.40.3.1 ESPLSimlCalculator() [1/3]

```
template<typename Network = UNetwork<>, typename DistType = double, typename NbHopsType =
std::size_t>
LinkPred::ESPLSimlCalculator< Network, DistType, NbHopsType >::ESPLSimlCalculator (
    Dijkstra< Network, DistType, NbHopsType > & dijkstra,
    EdgeLengthMapSP length,
    std::size_t lim,
    CacheLevel cacheLevel = CacheLevel::NetworkCache ) [inline]
```

Constructor.

## Parameters

|                   |                                              |
|-------------------|----------------------------------------------|
| <i>dijkstra</i>   | A <a href="#">Dijkstra</a> algorithm object. |
| <i>length</i>     | The length map.                              |
| <i>lim</i>        | Horizon limit.                               |
| <i>cacheLevel</i> | The cache level.                             |

## 9.40.3.2 ESPLSimlCalculator() [2/3]

```
template<typename Network = UNetwork<>, typename DistType = double, typename NbHopsType =
std::size_t>
LinkPred::ESPLSimlCalculator< Network, DistType, NbHopsType >::ESPLSimlCalculator (
    ESPLSimlCalculator< Network, DistType, NbHopsType > const & that ) [default]
```

Copy constructor.

## Parameters

|             |                     |
|-------------|---------------------|
| <i>that</i> | The object to copy. |
|-------------|---------------------|

## 9.40.3.3 ESPLSimlCalculator() [3/3]

```
template<typename Network = UNetwork<>, typename DistType = double, typename NbHopsType =
std::size_t>
LinkPred::ESPLSimlCalculator< Network, DistType, NbHopsType >::ESPLSimlCalculator (
    ESPLSimlCalculator< Network, DistType, NbHopsType > && that ) [default]
```

Move constructor.

## Parameters

|             |                     |
|-------------|---------------------|
| <i>that</i> | The object to move. |
|-------------|---------------------|

## 9.40.3.4 ~ ESPLSimlCalculator()

```
template<typename Network = UNetwork<>, typename DistType = double, typename NbHopsType =
std::size_t>
virtual LinkPred::ESPLSimlCalculator< Network, DistType, NbHopsType >::~~ ESPLSimlCalculator (
) [inline], [virtual]
```

Destructor.

## 9.40.4 Member Function Documentation

### 9.40.4.1 getDirSiml() [1/2]

```
template<typename Network = UNetwork<>, typename DistType = double, typename NbHopsType =
std::size_t>
virtual std::tuple<DistType, DistType, NbHopsType> LinkPred::ESPLSimlCalculator< Network,
DistType, NbHopsType >::getDirSiml (
    Edge const & e ) [inline], [virtual]
```

#### Parameters

|          |                |
|----------|----------------|
| <i>e</i> | An input edge. |
|----------|----------------|

#### Returns

The directed similarity between start and end of *e*.

### 9.40.4.2 getDirSiml() [2/2]

```
template<typename Network = UNetwork<>, typename DistType = double, typename NbHopsType =
std::size_t>
virtual std::tuple<DistType, DistType, NbHopsType> LinkPred::ESPLSimlCalculator< Network,
DistType, NbHopsType >::getDirSiml (
    NodeID const & i,
    NodeID const & j ) [virtual]
```

#### Parameters

|          |                           |
|----------|---------------------------|
| <i>i</i> | Index of the source node. |
| <i>j</i> | Index of the end node.    |

#### Returns

The directed similarity between *i* and *j*.

### 9.40.4.3 getLim()

```
template<typename Network = UNetwork<>, typename DistType = double, typename NbHopsType =
std::size_t>
std::size_t LinkPred::ESPLSimlCalculator< Network, DistType, NbHopsType >::getLim ( ) const
[inline]
```

**Returns**

The limit on the number of hops.

**9.40.4.4 getMaxNbNodesInCache()**

```
template<typename Network = UNetwork<>, typename DistType = double, typename NbHopsType =
std::size_t>
std::size_t LinkPred::ESPLSimlCalculator< Network, DistType, NbHopsType >::getMaxNbNodesInCache ( ) const [inline]
```

**Returns**

The maximum number of nodes allowed in cache.

**9.40.4.5 getNnzSimlMap()**

```
template<typename Network = UNetwork<>, typename DistType = double, typename NbHopsType =
std::size_t>
virtual NodeSDistMapSP LinkPred::ESPLSimlCalculator< Network, DistType, NbHopsType >::getNnzSimlMap (
    NodeID const & srcNode ) [virtual]
```

**Returns**

A sparse similarity map of nodes having non-zero similarity to a given source node.

**Parameters**

|                      |                  |
|----------------------|------------------|
| <code>srcNode</code> | The source node. |
|----------------------|------------------|

**9.40.4.6 getNnzSimlMapNoNeighb()**

```
template<typename Network = UNetwork<>, typename DistType = double, typename NbHopsType =
std::size_t>
virtual NodeSDistMapSP LinkPred::ESPLSimlCalculator< Network, DistType, NbHopsType >::getNnzSimlMapNoNeighb (
    NodeID const & srcNode ) [virtual]
```

**Returns**

A sparse similarity map of nodes having non-zero similarity to a given source node. Only nodes not connected to `srcNode` are considered. The node `srcNode` itself is also excluded.

## Parameters

|                |                  |
|----------------|------------------|
| <i>srcNode</i> | The source node. |
|----------------|------------------|

**9.40.4.7 getSiml() [1/2]**

```
template<typename Network = UNetwork<>, typename DistType = double, typename NbHopsType =
std::size_t>
virtual std::tuple<DistType, DistType, NbHopsType> LinkPred::ESPLSimlCalculator< Network,
DistType, NbHopsType >::getSiml (
    Edge const & e ) [inline], [virtual]
```

## Parameters

|          |                |
|----------|----------------|
| <i>e</i> | An input edge. |
|----------|----------------|

## Returns

The similarity between start and end of e.

**9.40.4.8 getSiml() [2/2]**

```
template<typename Network = UNetwork<>, typename DistType = double, typename NbHopsType =
std::size_t>
virtual std::tuple<DistType, DistType, NbHopsType> LinkPred::ESPLSimlCalculator< Network,
DistType, NbHopsType >::getSiml (
    NodeID const & i,
    NodeID const & j ) [virtual]
```

## Parameters

|          |                           |
|----------|---------------------------|
| <i>i</i> | Index of the source node. |
| <i>j</i> | Index of the end node.    |

## Returns

The similarity between i and j.

**9.40.4.9 isUseHops()**

```
template<typename Network = UNetwork<>, typename DistType = double, typename NbHopsType =
std::size_t>
bool LinkPred::ESPLSimlCalculator< Network, DistType, NbHopsType >::isUseHops ( ) const [inline]
```

**Returns**

True if the number of hops is used to compute similarity.

**9.40.4.10 operator=()** [1/2]

```
template<typename Network = UNetwork<>, typename DistType = double, typename NbHopsType =
std::size_t>
ESPLSimlCalculator& LinkPred::ESPLSimlCalculator< Network, DistType, NbHopsType >::operator= (
    ESPLSimlCalculator< Network, DistType, NbHopsType > && that ) [default]
```

Move assignment operator.

**Parameters**

|             |                     |
|-------------|---------------------|
| <i>that</i> | The object to move. |
|-------------|---------------------|

**9.40.4.11 operator=()** [2/2]

```
template<typename Network = UNetwork<>, typename DistType = double, typename NbHopsType =
std::size_t>
ESPLSimlCalculator& LinkPred::ESPLSimlCalculator< Network, DistType, NbHopsType >::operator= (
    ESPLSimlCalculator< Network, DistType, NbHopsType > const & that ) [default]
```

Copy assignment operator.

**Parameters**

|             |                     |
|-------------|---------------------|
| <i>that</i> | The object to copy. |
|-------------|---------------------|

**9.40.4.12 setMaxNbNodesInCache()**

```
template<typename Network = UNetwork<>, typename DistType = double, typename NbHopsType =
std::size_t>
void LinkPred::ESPLSimlCalculator< Network, DistType, NbHopsType >::setMaxNbNodesInCache (
    std::size_t maxNbNodesInCache ) [inline]
```

Set the maximum number of nodes in cache (for each node a map of similarity to all other nodes is kept in memory).

**Parameters**

|                          |                                                     |
|--------------------------|-----------------------------------------------------|
| <i>maxNbNodesInCache</i> | New value for the maximum number of nodes in cache. |
|--------------------------|-----------------------------------------------------|

#### 9.40.4.13 setUseHops()

```
template<typename Network = UNetwork<>, typename DistType = double, typename NbHopsType =
std::size_t>
void LinkPred::ESPSimlCalculator< Network, DistType, NbHopsType >::setUseHops (
    bool useHops ) [inline]
```

##### Parameters

|                |                                                               |
|----------------|---------------------------------------------------------------|
| <i>useHops</i> | Set whether the number of hops is used to compute similarity. |
|----------------|---------------------------------------------------------------|

The documentation for this class was generated from the following file:

- include/linkpred/graphalg/shortestpaths/[netdistcalculator.hpp](#)

## 9.41 LinkPred::ESPSimlCalculator< Network, DistType, NbHopsType > Class Template Reference

Exact shortest path distance calculator.

```
#include <netdistcalculator.hpp>
```

Inheritance diagram for LinkPred::ESPSimlCalculator< Network, DistType, NbHopsType >:

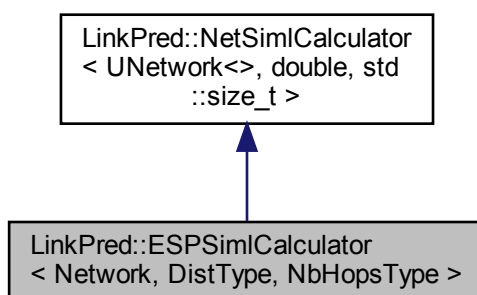



Collaboration diagram for LinkPred::ESPSimlCalculator< Network, DistType, NbHopsType >:

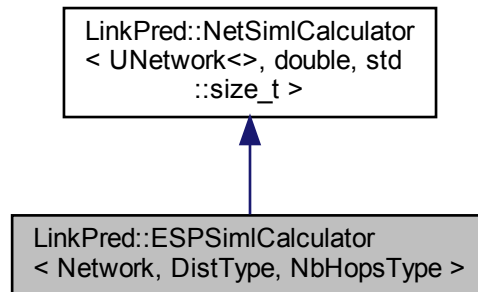

## Public Types

- using [LengthMapIdType](#) = typename [NetSimlCalculator](#)< Network, DistType, NbHopsType >::LengthMapIdType
- using [NetworkSP](#) = typename [NetSimlCalculator](#)< Network, DistType, NbHopsType >::NetworkSP
- using [NodeId](#) = typename [NetSimlCalculator](#)< Network, DistType, NbHopsType >::NodeId
- using [Label](#) = typename [NetSimlCalculator](#)< Network, DistType, NbHopsType >::Label
- using [Edge](#) = typename [NetSimlCalculator](#)< Network, DistType, NbHopsType >::Edge
- using [NodeDistMap](#) = typename Network::template NodeMap< std::pair< DistType, NbHopsType > >
- using [NodeDistMapSP](#) = typename Network::template NodeMapSP< std::pair< DistType, NbHopsType > >
- using [EdgeLengthMap](#) = typename [NetSimlCalculator](#)< Network, DistType, NbHopsType >::EdgeLengthMap
- using [EdgeLengthMapSP](#) = typename [NetSimlCalculator](#)< Network, DistType, NbHopsType >::EdgeLengthMapSP

## Public Member Functions

- [ESPSimlCalculator](#) ([Dijkstra](#)< Network, DistType, NbHopsType > &dijkstra, [EdgeLengthMapSP](#) length, [CacheLevel](#) cacheLevel=CacheLevel::NetworkCache)
- [ESPSimlCalculator](#) ([ESPSimlCalculator](#) const &that)=default
- [ESPSimlCalculator](#) & operator= ([ESPSimlCalculator](#) const &that)=default
- [ESPSimlCalculator](#) ([ESPSimlCalculator](#) &&that)=default
- [ESPSimlCalculator](#) & operator= ([ESPSimlCalculator](#) &&that)=default
- virtual std::tuple< DistType, DistType, NbHopsType > [getSiml](#) ([NodeId](#) const &i, [NodeId](#) const &j)
- virtual std::tuple< DistType, DistType, NbHopsType > [getDirSiml](#) ([NodeId](#) const &i, [NodeId](#) const &j)
- virtual std::tuple< DistType, DistType, NbHopsType > [getSiml](#) ([Edge](#) const &e)
- virtual std::tuple< DistType, DistType, NbHopsType > [getDirSiml](#) ([Edge](#) const &e)
- std::size\_t [getMaxNbNodesInCache](#) () const
- void [setMaxNbNodesInCache](#) (std::size\_t maxNbNodesInCache)
- virtual [~ESPSimlCalculator](#) ()

### 9.41.1 Detailed Description

```
template<typename Network = UNetwork<>, typename DistType = double, typename NbHopsType = std::size_t>
class LinkPred::ESPSimlCalculator< Network, DistType, NbHopsType >
```

Exact shortest path distance calculator.

This class offers an additional layer over [Dijkstra](#) which provides memory management functionalities by caching computed distances.

#### Template Parameters

|                   |                                                               |
|-------------------|---------------------------------------------------------------|
| <i>Network</i>    | The network type.                                             |
| <i>DistType</i>   | The distance type (can be an integer or floating point type). |
| <i>NbHopsType</i> | The type of the number of hops (must be an integer type).     |

### 9.41.2 Member Typedef Documentation

#### 9.41.2.1 Edge

```
template<typename Network = UNetwork<>, typename DistType = double, typename NbHopsType =
std::size_t>
using LinkPred::ESPSimlCalculator< Network, DistType, NbHopsType >::Edge = typename NetSimlCalculator<Network,
DistType, NbHopsType>::Edge
```

Edge type.

#### 9.41.2.2 EdgeLengthMap

```
template<typename Network = UNetwork<>, typename DistType = double, typename NbHopsType =
std::size_t>
using LinkPred::ESPSimlCalculator< Network, DistType, NbHopsType >::EdgeLengthMap = typename
NetSimlCalculator<Network, DistType, NbHopsType>::EdgeLengthMap
```

Edge length map.

#### 9.41.2.3 EdgeLengthMapSP

```
template<typename Network = UNetwork<>, typename DistType = double, typename NbHopsType =
std::size_t>
using LinkPred::ESPSimlCalculator< Network, DistType, NbHopsType >::EdgeLengthMapSP = typename
NetSimlCalculator<Network, DistType, NbHopsType>::EdgeLengthMapSP
```

Shared pointer to an edge length map.

#### 9.41.2.4 Label

```
template<typename Network = UNetwork<>, typename DistType = double, typename NbHopsType =
std::size_t>
using LinkPred::ESPSimlCalculator< Network, DistType, NbHopsType >::Label = typename NetSimlCalculator<Network,
DistType, NbHopsType>::Label
```

Nodes label type.

#### 9.41.2.5 LengthMapIdType

```
template<typename Network = UNetwork<>, typename DistType = double, typename NbHopsType =
std::size_t>
using LinkPred::ESPSimlCalculator< Network, DistType, NbHopsType >::LengthMapIdType = typename
NetSimlCalculator<Network, DistType, NbHopsType>::LengthMapIdType
```

Length map ID type.

#### 9.41.2.6 NetworkSP

```
template<typename Network = UNetwork<>, typename DistType = double, typename NbHopsType =
std::size_t>
using LinkPred::ESPSimlCalculator< Network, DistType, NbHopsType >::NetworkSP = typename
NetSimlCalculator<Network, DistType, NbHopsType>::NetworkSP
```

Shared pointer to network.

#### 9.41.2.7 NodeDistMap

```
template<typename Network = UNetwork<>, typename DistType = double, typename NbHopsType =
std::size_t>
using LinkPred::ESPSimlCalculator< Network, DistType, NbHopsType >::NodeDistMap = typename
Network::template NodeMap<std::pair<DistType, NbHopsType> >
```

Distance map.

#### 9.41.2.8 NodeDistMapSP

```
template<typename Network = UNetwork<>, typename DistType = double, typename NbHopsType =
std::size_t>
using LinkPred::ESPSimlCalculator< Network, DistType, NbHopsType >::NodeDistMapSP = typename
Network::template NodeMapSP<std::pair<DistType, NbHopsType> >
```

Shared pointer to a distance map.

#### 9.41.2.9 NodeID

```
template<typename Network = UNetwork<>, typename DistType = double, typename NbHopsType =
std::size_t>
using LinkPred::ESPSimlCalculator< Network, DistType, NbHopsType >::NodeID = typename NetSimlCalculator<Network,
DistType, NbHopsType>::NodeID
```

Nodes ID type.

## 9.41.3 Constructor & Destructor Documentation

### 9.41.3.1 ESPSimlCalculator() [1/3]

```
template<typename Network = UNetwork<>, typename DistType = double, typename NbHopsType =
std::size_t>
LinkPred::ESPSimlCalculator< Network, DistType, NbHopsType >::ESPSimlCalculator (
    Dijkstra< Network, DistType, NbHopsType > & dijkstra,
    EdgeLengthMapSP length,
    CacheLevel cacheLevel = CacheLevel::NetworkCache ) [inline]
```

Constructor.

Parameters

|                   |                                              |
|-------------------|----------------------------------------------|
| <i>dijkstra</i>   | A <a href="#">Dijkstra</a> algorithm object. |
| <i>length</i>     | The length map.                              |
| <i>cacheLevel</i> | The cache level.                             |

### 9.41.3.2 ESPSimlCalculator() [2/3]

```
template<typename Network = UNetwork<>, typename DistType = double, typename NbHopsType =
std::size_t>
LinkPred::ESPSimlCalculator< Network, DistType, NbHopsType >::ESPSimlCalculator (
    ESPSimlCalculator< Network, DistType, NbHopsType > const & that ) [default]
```

Copy constructor.

Parameters

|             |                     |
|-------------|---------------------|
| <i>that</i> | The object to copy. |
|-------------|---------------------|

### 9.41.3.3 ESPSimlCalculator() [3/3]

```
template<typename Network = UNetwork<>, typename DistType = double, typename NbHopsType =
std::size_t>
LinkPred::ESPSimlCalculator< Network, DistType, NbHopsType >::ESPSimlCalculator (
    ESPSimlCalculator< Network, DistType, NbHopsType > && that ) [default]
```

Move constructor.

## Parameters

|             |                     |
|-------------|---------------------|
| <i>that</i> | The object to move. |
|-------------|---------------------|

## 9.41.3.4 ~ESPSimlCalculator()

```
template<typename Network = UNetwork<>, typename DistType = double, typename NbHopsType =
std::size_t>
virtual LinkPred::ESPSimlCalculator< Network, DistType, NbHopsType >::~~ESPSimlCalculator ( )
[inline], [virtual]
```

Destructor.

## 9.41.4 Member Function Documentation

## 9.41.4.1 getDirSiml() [1/2]

```
template<typename Network = UNetwork<>, typename DistType = double, typename NbHopsType =
std::size_t>
virtual std::tuple<DistType, DistType, NbHopsType> LinkPred::ESPSimlCalculator< Network,
DistType, NbHopsType >::getDirSiml (
    Edge const & e ) [inline], [virtual]
```

## Parameters

|          |                |
|----------|----------------|
| <i>e</i> | An input edge. |
|----------|----------------|

## Returns

The directed similarity between start and end of e.

## 9.41.4.2 getDirSiml() [2/2]

```
template<typename Network = UNetwork<>, typename DistType = double, typename NbHopsType =
std::size_t>
virtual std::tuple<DistType, DistType, NbHopsType> LinkPred::ESPSimlCalculator< Network,
DistType, NbHopsType >::getDirSiml (
    NodeID const & i,
    NodeID const & j ) [virtual]
```

**Parameters**

|          |                           |
|----------|---------------------------|
| <i>i</i> | Index of the source node. |
| <i>j</i> | Index of the end node.    |

**Returns**

The directed similarity between *i* and *j*.

**9.41.4.3 getMaxNbNodesInCache()**

```
template<typename Network = UNetwork<>, typename DistType = double, typename NbHopsType =
std::size_t>
std::size_t LinkPred::ESPSimlCalculator< Network, DistType, NbHopsType >::getMaxNbNodesInCache
( ) const [inline]
```

**Returns**

The maximum number of nodes allowed in cache.

**9.41.4.4 getSiml() [1/2]**

```
template<typename Network = UNetwork<>, typename DistType = double, typename NbHopsType =
std::size_t>
virtual std::tuple<DistType, DistType, NbHopsType> LinkPred::ESPSimlCalculator< Network,
DistType, NbHopsType >::getSiml (
    Edge const & e ) [inline], [virtual]
```

**Parameters**

|          |       |
|----------|-------|
| <i>e</i> | Edge. |
|----------|-------|

**Returns**

The similarity between the two ends of the edge.

**9.41.4.5 getSiml() [2/2]**

```
template<typename Network = UNetwork<>, typename DistType = double, typename NbHopsType =
std::size_t>
virtual std::tuple<DistType, DistType, NbHopsType> LinkPred::ESPSimlCalculator< Network,
DistType, NbHopsType >::getSiml (
    NodeID const & i,
    NodeID const & j ) [virtual]
```

## Parameters

|          |                           |
|----------|---------------------------|
| <i>i</i> | Index of the source node. |
| <i>j</i> | Index of the end node.    |

## Returns

The similarity between *i* and *j*.

## 9.41.4.6 operator=() [1/2]

```
template<typename Network = UNetwork<>, typename DistType = double, typename NbHopsType =
std::size_t>
ESPSimlCalculator& LinkPred::ESPSimlCalculator< Network, DistType, NbHopsType >::operator= (
    ESPSimlCalculator< Network, DistType, NbHopsType > && that ) [default]
```

Move assignment operator.

## Parameters

|             |                     |
|-------------|---------------------|
| <i>that</i> | The object to move. |
|-------------|---------------------|

## 9.41.4.7 operator=() [2/2]

```
template<typename Network = UNetwork<>, typename DistType = double, typename NbHopsType =
std::size_t>
ESPSimlCalculator& LinkPred::ESPSimlCalculator< Network, DistType, NbHopsType >::operator= (
    ESPSimlCalculator< Network, DistType, NbHopsType > const & that ) [default]
```

Copy assignment operator.

## Parameters

|             |                     |
|-------------|---------------------|
| <i>that</i> | The object to copy. |
|-------------|---------------------|

## 9.41.4.8 setMaxNbNodesInCache()

```
template<typename Network = UNetwork<>, typename DistType = double, typename NbHopsType =
std::size_t>
void LinkPred::ESPSimlCalculator< Network, DistType, NbHopsType >::setMaxNbNodesInCache (
    std::size_t maxNbNodesInCache ) [inline]
```

Set the maximum number of nodes in cache (for each node a map of similarity to all other nodes is kept in memory).

## Parameters

|                          |                                                     |
|--------------------------|-----------------------------------------------------|
| <i>maxNbNodesInCache</i> | New value for the maximum number of nodes in cache. |
|--------------------------|-----------------------------------------------------|

The documentation for this class was generated from the following file:

- [include/linkpred/graphalg/shortestpaths/netdistcalculator.hpp](#)

## 9.42 LinkPred::Simp::Evaluator Class Reference

A class that simplifies the evaluation of link prediction algorithms.

```
#include <evaluator.hpp>
```

### Public Member Functions

- [Evaluator](#) ()
- [Evaluator](#) ([Evaluator](#) const &that)=default
- virtual [~Evaluator](#) ()=default
- void [addADA](#) (std::string const &name="ADA")
- void [addCNE](#) (std::string const &name="CNE")
- void [addCRA](#) (std::string const &name="CRA")
- void [addECL](#) (std::string const &name="ECL-N2V-LGR", std::string encoderName="N2V", std::string classifierName="LGR", int dim=0, double posRatio=1.0, double negRatio=1.0, long int seed=0)
- void [addESM](#) (std::string const &name="ESM-N2V-L2", std::string encoderName="N2V", std::string sim↵ MeasureName="L2", int dim=0, long int seed=0)
- void [addFBM](#) (std::string const &name="FBM", int maxIter=50, long int seed=0)
- void [addHDI](#) (std::string const &name="HDI")
- void [addHPI](#) (std::string const &name="HPI")
- void [addHRG](#) (std::string const &name="HRG", int nbBeans=25, int nbSamples=10000, long int seed=0)
- void [addHYP](#) (std::string const &name="HYP", double m=1.5, double L=1, double gamma=2.1, double zeta=1, double T=0.8, long int seed=0)
- void [addJID](#) (std::string const &name="JID")
- void [addKAB](#) (std::string const &name="KAB", int horizLim=2)
- void [addLCP](#) (std::string const &name="LCP", double epsilon=0.001)
- void [addLHN](#) (std::string const &name="LHN")
- void [addPAT](#) (std::string const &name="PAT")
- void [addPST](#) (std::string const &name="PST", std::string fileName="pst.csv")
- void [addRAL](#) (std::string const &name="RAL")
- void [addRND](#) (std::string const &name="RND", long int seed=0)
- void [addSAI](#) (std::string const &name="SAI")
- void [addSBM](#) (std::string const &name="SBM", int maxIter=1000, long int seed=0)
- void [addSHP](#) (std::string const &name="SHP", long int seed=0)
- void [addSOI](#) (std::string const &name="SOI")
- void [addROC](#) ()
- void [addPR](#) ()
- void [addTPR](#) ()
- void [genTestData](#) (std::string const &fullNetFileName, std::string const &obsEdgesFileName, std::string const &remEdgesFileName, double remRatio=0.1, bool keepConnected=false, long int seed=0)
- void [run](#) (std::string const &fullNetFileName, int nbRuns=10, double remRatio=0.1, bool keep↵ Connected=false, long int seed=0)
- void [run](#) (std::string const &obsEdgesFileName, std::string const &remEdgesFileName)
- std::vector< [PerfRes](#) > [getPerfRes](#) (int iter)



## 9.42.1 Detailed Description

A class that simplifies the evaluation of link prediction algorithms.

## 9.42.2 Constructor & Destructor Documentation

### 9.42.2.1 Evaluator() [1/2]

```
LinkPred::Simp::Evaluator::Evaluator ( )
```

#### Parameters

|            |              |
|------------|--------------|
| <i>net</i> | The network. |
|------------|--------------|

### 9.42.2.2 Evaluator() [2/2]

```
LinkPred::Simp::Evaluator::Evaluator (
    Evaluator const & that ) [default]
```

Copy constructor.

#### Parameters

|             |                     |
|-------------|---------------------|
| <i>that</i> | The object to copy. |
|-------------|---------------------|

### 9.42.2.3 ~Evaluator()

```
virtual LinkPred::Simp::Evaluator::~~Evaluator ( ) [virtual], [default]
```

Destructor.

## 9.42.3 Member Function Documentation

### 9.42.3.1 addADA()

```
void LinkPred::Simp::Evaluator::addADA (
    std::string const & name = "ADA" )
```

Add Adamic Adar predictor.

## Parameters

|             |                                        |
|-------------|----------------------------------------|
| <i>name</i> | A unique identifier for the predictor. |
|-------------|----------------------------------------|

**9.42.3.2 addCNE()**

```
void LinkPred::Simp::Evaluator::addCNE (
    std::string const & name = "CNE" )
```

Add common neighbors.

## Parameters

|             |                                        |
|-------------|----------------------------------------|
| <i>name</i> | A unique identifier for the predictor. |
|-------------|----------------------------------------|

**9.42.3.3 addCRA()**

```
void LinkPred::Simp::Evaluator::addCRA (
    std::string const & name = "CRA" )
```

Add Cannistraci resource allocation.

## Parameters

|             |                                        |
|-------------|----------------------------------------|
| <i>name</i> | A unique identifier for the predictor. |
|-------------|----------------------------------------|

**9.42.3.4 addECL()**

```
void LinkPred::Simp::Evaluator::addECL (
    std::string const & name = "ECL-N2V-LGR",
    std::string encoderName = "N2V",
    std::string classifierName = "LGR",
    int dim = 0,
    double posRatio = 1.0,
    double negRatio = 1.0,
    long int seed = 0 )
```

Add an encoder-classifier link predictor.

## Parameters

|             |                                        |
|-------------|----------------------------------------|
| <i>name</i> | A unique identifier for the predictor. |
|-------------|----------------------------------------|

## Parameters

|                       |                                                                                                                                                                                                                                                                                                                                |
|-----------------------|--------------------------------------------------------------------------------------------------------------------------------------------------------------------------------------------------------------------------------------------------------------------------------------------------------------------------------|
| <i>encoderName</i>    | The name of the encoder. Possible values are: DPW ( <a href="#">DeepWalk</a> ), <a href="#">HMSM</a> (Hidden Metric Space Model), LVS ( <a href="#">LargeVis</a> ), LEM (Laplacian Eigenmaps), LIN ( <a href="#">LINE</a> ), LLE (Locally Linear Embedding), MFC (Matrix Factorization), and N2V ( <a href="#">Node2Vec</a> ). |
| <i>classifierName</i> | The name of the classifier. Possible values are: FFN (feed-forward neural network withn default architecture), LSVM (linear SVM), LGR (logistic regression), NVB (naive Bayes). All classifiers except logistic regression requirte compilation with mlpack.                                                                   |
| <i>dim</i>            | The dimension of the embedding space. If set to zero, the default value is used (the default dimension depends on the ecnoder).                                                                                                                                                                                                |
| <i>posRatio</i>       | Ratio of positive edges used in the training of the classifier.                                                                                                                                                                                                                                                                |
| <i>negRatio</i>       | Ratio of negative edges used in the training of the classifier.                                                                                                                                                                                                                                                                |
| <i>seed</i>           | Seed of the random number generator.                                                                                                                                                                                                                                                                                           |

## 9.42.3.5 addESM()

```
void LinkPred::Simp::Evaluator::addESM (
    std::string const & name = "ESM-N2V-L2",
    std::string encoderName = "N2V",
    std::string simMeasureName = "L2",
    int dim = 0,
    long int seed = 0 )
```

Add an encoder-similarity measure link predictor.

## Parameters

|                       |                                                                                                                                                                                                                                                                                                                                |
|-----------------------|--------------------------------------------------------------------------------------------------------------------------------------------------------------------------------------------------------------------------------------------------------------------------------------------------------------------------------|
| <i>name</i>           | A unique identifier for the predictor.                                                                                                                                                                                                                                                                                         |
| <i>encoderName</i>    | The name of the encoder. Possible values are: DPW ( <a href="#">DeepWalk</a> ), <a href="#">HMSM</a> (Hidden Metric Space Model), LVS ( <a href="#">LargeVis</a> ), LEM (Laplacian Eigenmaps), LIN ( <a href="#">LINE</a> ), LLE (Locally Linear Embedding), MFC (Matrix Factorization), and N2V ( <a href="#">Node2Vec</a> ). |
| <i>simMeasureName</i> | The name of the similarity measure. Possible values are: CSM (cosine similarity), DTP (dot product), L1 (L1 similarity), L2 (L2 similarity), PRS ( <a href="#">Pearson</a> similarity).                                                                                                                                        |
| <i>dim</i>            | The dimension of the embedding space. If set to zero, the default value is used (the default dimension depends on the ecnoder).                                                                                                                                                                                                |
| <i>seed</i>           | Seed of the random number generator.                                                                                                                                                                                                                                                                                           |

## 9.42.3.6 addFBM()

```
void LinkPred::Simp::Evaluator::addFBM (
    std::string const & name = "FBM",
    int maxIter = 50,
    long int seed = 0 )
```

Add fast blocking model.

## Parameters

|                |                                        |
|----------------|----------------------------------------|
| <i>name</i>    | A unique identifier for the predictor. |
| <i>maxIter</i> | Maximum number of iterations.          |
| <i>seed</i>    | Seed of the random number generator.   |

**9.42.3.7 addHDI()**

```
void LinkPred::Simp::Evaluator::addHDI (
    std::string const & name = "HDI" )
```

Add hub depromoted index.

## Parameters

|             |                                        |
|-------------|----------------------------------------|
| <i>name</i> | A unique identifier for the predictor. |
|-------------|----------------------------------------|

**9.42.3.8 addHPI()**

```
void LinkPred::Simp::Evaluator::addHPI (
    std::string const & name = "HPI" )
```

Add Hub promoted index.

## Parameters

|             |                                        |
|-------------|----------------------------------------|
| <i>name</i> | A unique identifier for the predictor. |
|-------------|----------------------------------------|

**9.42.3.9 addHRG()**

```
void LinkPred::Simp::Evaluator::addHRG (
    std::string const & name = "HRG",
    int nbBeans = 25,
    int nbSamples = 10000,
    long int seed = 0 )
```

Add hierarchical random graph.

## Parameters

|                  |                                              |
|------------------|----------------------------------------------|
| <i>name</i>      | A unique identifier for the predictor.       |
| <i>nbBeans</i>   | Number of bins in edge statistics histogram. |
| <i>nbSamples</i> | Number of samples to take for predictions.   |
| <i>seed</i>      | Seed of the random number generator.         |

**9.42.3.10 addHYP()**

```
void LinkPred::Simp::Evaluator::addHYP (
    std::string const & name = "HYP",
    double m = 1.5,
    double L = 1,
    double gamma = 2.1,
    double zeta = 1,
    double T = 0.8,
    long int seed = 0 )
```

Add Hypermap.

**Parameters**

|              |                                                               |
|--------------|---------------------------------------------------------------|
| <i>name</i>  | A unique identifier for the predictor.                        |
| <i>m</i>     | The parameter m (see the algorithm description).              |
| <i>L</i>     | The parameter L (see the algorithm description).              |
| <i>gamma</i> | The power law exponent gamma (see the algorithm description). |
| <i>zeta</i>  | The parameter zeta (see the algorithm description).           |
| <i>T</i>     | The parameter T (see the algorithm description).              |
| <i>seed</i>  | The random number generator seed.                             |

**9.42.3.11 addJID()**

```
void LinkPred::Simp::Evaluator::addJID (
    std::string const & name = "JID" )
```

Add Jackard index predictor.

**Parameters**

|             |                                        |
|-------------|----------------------------------------|
| <i>name</i> | A unique identifier for the predictor. |
|-------------|----------------------------------------|

**9.42.3.12 addKAB()**

```
void LinkPred::Simp::Evaluator::addKAB (
    std::string const & name = "KAB",
    int horizLim = 2 )
```

Add the scalable popularity similarity link predictor proposed in: "Kerrache, S., Alharbi, R. & Benhidour, H. A Scalable Similarity-Popularity Link Prediction Method. Sci Rep 10, 6394 (2020)".

## Parameters

|                 |                                        |
|-----------------|----------------------------------------|
| <i>name</i>     | A unique identifier for the predictor. |
| <i>horizLim</i> | Horizon limit.                         |

**9.42.3.13 addLCP()**

```
void LinkPred::Simp::Evaluator::addLCP (
    std::string const & name = "LCP",
    double epsilon = 0.001 )
```

Add local path.

## Parameters

|                |                                        |
|----------------|----------------------------------------|
| <i>name</i>    | A unique identifier for the predictor. |
| <i>epsilon</i> | The weight of paths of length 3.       |

**9.42.3.14 addLHN()**

```
void LinkPred::Simp::Evaluator::addLHN (
    std::string const & name = "LHN" )
```

Add Leicht-Holme-Newman index.

## Parameters

|             |                                        |
|-------------|----------------------------------------|
| <i>name</i> | A unique identifier for the predictor. |
|-------------|----------------------------------------|

**9.42.3.15 addPAT()**

```
void LinkPred::Simp::Evaluator::addPAT (
    std::string const & name = "PAT" )
```

Add preferential attachment index.

## Parameters

|             |                                        |
|-------------|----------------------------------------|
| <i>name</i> | A unique identifier for the predictor. |
|-------------|----------------------------------------|

### 9.42.3.16 addPR()

```
void LinkPred::Simp::Evaluator::addPR ( )
```

Add area under the precision-recall curve.

### 9.42.3.17 addPST()

```
void LinkPred::Simp::Evaluator::addPST (
    std::string const & name = "PST",
    std::string fileName = "pst.csv" )
```

Add pre-stored results. This is designed to work with `run(std::string const &obsEdgesFileName, std::string const &remEdgesFileName, long int seed)` to measure the performance of user-defined prediction algorithms.

#### Parameters

|                 |                                                                                |
|-----------------|--------------------------------------------------------------------------------|
| <i>name</i>     | A unique identifier for the predictor.                                         |
| <i>fileName</i> | File containing the scores of all non-exisityng links in the training network. |

### 9.42.3.18 addRAL()

```
void LinkPred::Simp::Evaluator::addRAL (
    std::string const & name = "RAL" )
```

Add resource allocation index.

#### Parameters

|             |                                        |
|-------------|----------------------------------------|
| <i>name</i> | A unique identifier for the predictor. |
|-------------|----------------------------------------|

### 9.42.3.19 addRND()

```
void LinkPred::Simp::Evaluator::addRND (
    std::string const & name = "RND",
    long int seed = 0 )
```

Add random predictor.

#### Parameters

|             |                                        |
|-------------|----------------------------------------|
| <i>name</i> | A unique identifier for the predictor. |
| <i>seed</i> | The random number generator seed.      |

#### 9.42.3.20 addROC()

```
void LinkPred::Simp::Evaluator::addROC ( )
```

Add area under the ROC curve.

#### 9.42.3.21 addSAI()

```
void LinkPred::Simp::Evaluator::addSAI (
    std::string const & name = "SAI" )
```

Add Salton index.

##### Parameters

|             |                                        |
|-------------|----------------------------------------|
| <i>name</i> | A unique identifier for the predictor. |
|-------------|----------------------------------------|

#### 9.42.3.22 addSBM()

```
void LinkPred::Simp::Evaluator::addSBM (
    std::string const & name = "SBM",
    int maxIter = 1000,
    long int seed = 0 )
```

Add stochastic blocking model.

##### Parameters

|                |                                        |
|----------------|----------------------------------------|
| <i>name</i>    | A unique identifier for the predictor. |
| <i>maxIter</i> | Maximum number of iterations.          |
| <i>seed</i>    | Seed of the random number generator.   |

#### 9.42.3.23 addSHP()

```
void LinkPred::Simp::Evaluator::addSHP (
    std::string const & name = "SHP",
    long int seed = 0 )
```

Add shortest path predictor.



## Parameters

|             |                                        |
|-------------|----------------------------------------|
| <i>name</i> | A unique identifier for the predictor. |
| <i>seed</i> | The random number generator seed.      |

**9.42.3.24 addSOI()**

```
void LinkPred::Simp::Evaluator::addSOI (
    std::string const & name = "SOI" )
```

Add Sorensen index.

## Parameters

|             |                                        |
|-------------|----------------------------------------|
| <i>name</i> | A unique identifier for the predictor. |
|-------------|----------------------------------------|

**9.42.3.25 addTPR()**

```
void LinkPred::Simp::Evaluator::addTPR ( )
```

Add top precision.

**9.42.3.26 genTestData()**

```
void LinkPred::Simp::Evaluator::genTestData (
    std::string const & fullNetFileName,
    std::string const & obsEdgesFileName,
    std::string const & remEdgesFileName,
    double remRatio = 0.1,
    bool keepConnected = false,
    long int seed = 0 )
```

Generate test data and save it to file.

## Parameters

|                         |                                                                                                                                              |
|-------------------------|----------------------------------------------------------------------------------------------------------------------------------------------|
| <i>fullNetFileName</i>  | This the file containing the ground truth network.                                                                                           |
| <i>obsEdgesFileName</i> | The method writes the remaining edges into this file. This constitutes the training set.                                                     |
| <i>remEdgesFileName</i> | The method writes the removed edges into this file. This constitutes the positive examples of the test set.                                  |
| <i>remRatio</i>         | Edge remove ratio.                                                                                                                           |
| <i>keepConnected</i>    | Whether to keep the graph connected when removing edges. This may be impossible for high ratios or if the network is initially disconnected. |
| <i>seed</i>             | Seed for the random number generator                                                                                                         |

### 9.42.3.27 getPerfRes()

```
std::vector<PerfRes> LinkPred::Simp::Evaluator::getPerfRes (
    int iter ) [inline]
```

#### Parameters

|             |                   |
|-------------|-------------------|
| <i>iter</i> | Iteration number. |
|-------------|-------------------|

#### Returns

The performance results at the specified iteration.

### 9.42.3.28 run() [1/2]

```
void LinkPred::Simp::Evaluator::run (
    std::string const & fullNetFileName,
    int nbRuns = 10,
    double remRatio = 0.1,
    bool keepConnected = false,
    long int seed = 0 )
```

Run a performance evaluation. This method creates test data by randomly removing edges from the full network.

#### Parameters

|                        |                                                                                                                                              |
|------------------------|----------------------------------------------------------------------------------------------------------------------------------------------|
| <i>fullNetFileName</i> | The network file name. This is the full network (ground truth) containing all edges.                                                         |
| <i>nbRuns</i>          | Number of times the experiment is run. Each time the test set is changed.                                                                    |
| <i>remRatio</i>        | Edge remove ratio.                                                                                                                           |
| <i>keepConnected</i>   | Whether to keep the graph connected when removing edges. This may be impossible for high ratios or if the network is initially disconnected. |
| <i>seed</i>            | Seed for the random number generator                                                                                                         |

### 9.42.3.29 run() [2/2]

```
void LinkPred::Simp::Evaluator::run (
    std::string const & obsEdgesFileName,
    std::string const & remEdgesFileName )
```

Run a performance evaluation. This method uses the test data given as input

## Parameters

|                         |                                                                          |
|-------------------------|--------------------------------------------------------------------------|
| <i>obsEdgesFileName</i> | A file containing observed edges (training set).                         |
| <i>remEdgesFileName</i> | A file containing removed edges (the positive examples of the test set). |

The documentation for this class was generated from the following file:

- [include/linkpred/simp/evaluator.hpp](#)

## 9.43 LinkPred::FastSig< T > Class Template Reference

A fast sigmoid.

```
#include <fastsig.hpp>
```

### Public Member Functions

- [FastSig](#) ()
- [FastSig](#) (int n, T lowBound, T uppBound)
- [FastSig](#) ([FastSig](#) const &that)=default
- [FastSig](#) & [operator=](#) ([FastSig](#) const &that)=default
- [FastSig](#) ([FastSig](#) &&that)=default
- [FastSig](#) & [operator=](#) ([FastSig](#) &&that)=default
- T [operator\(\)](#) (T x)
- virtual [~FastSig](#) ()=default

### 9.43.1 Detailed Description

```
template<typename T>
class LinkPred::FastSig< T >
```

A fast sigmoid.

#### Template Parameters

|          |                                               |
|----------|-----------------------------------------------|
| <i>T</i> | Function value type (must be floating point). |
|----------|-----------------------------------------------|

### 9.43.2 Constructor & Destructor Documentation

#### 9.43.2.1 FastSig() [1/4]

```
template<typename T >
LinkPred::FastSig< T >::FastSig ( ) [inline]
```

Default constructor.

#### 9.43.2.2 FastSig() [2/4]

```
template<typename T >
LinkPred::FastSig< T >::FastSig (
    int n,
    T lowBound,
    T uppBound ) [inline]
```

Constructor.

##### Parameters

|                 |                                                                       |
|-----------------|-----------------------------------------------------------------------|
| <i>n</i>        | Sigmoid table size.                                                   |
| <i>lowBound</i> | Lower bound. Any input smaller than lowBound is assigned the value 0. |
| <i>uppBound</i> | Upper bound. Any input greater than uppBound is assigned the value 1. |

#### 9.43.2.3 FastSig() [3/4]

```
template<typename T >
LinkPred::FastSig< T >::FastSig (
    FastSig< T > const & that ) [default]
```

Copy constructor.

##### Parameters

|             |                     |
|-------------|---------------------|
| <i>that</i> | The object to copy. |
|-------------|---------------------|

#### 9.43.2.4 FastSig() [4/4]

```
template<typename T >
LinkPred::FastSig< T >::FastSig (
    FastSig< T > && that ) [default]
```

Move constructor.

##### Parameters

|             |                     |
|-------------|---------------------|
| <i>that</i> | The object to move. |
|-------------|---------------------|

### 9.43.2.5 ~FastSig()

```
template<typename T >
virtual LinkPred::FastSig< T >::~~FastSig ( ) [virtual], [default]
```

Destructor.

## 9.43.3 Member Function Documentation

### 9.43.3.1 operator()()

```
template<typename T >
T LinkPred::FastSig< T >::operator() (
    T x ) [inline]
```

#### Parameters

|          |              |
|----------|--------------|
| <i>x</i> | Input value. |
|----------|--------------|

#### Returns

Sigmoid(*x*) (approximated of course).

### 9.43.3.2 operator=() [1/2]

```
template<typename T >
FastSig& LinkPred::FastSig< T >::operator= (
    FastSig< T > && that ) [default]
```

Move assignment operator.

#### Parameters

|             |                     |
|-------------|---------------------|
| <i>that</i> | The object to move. |
|-------------|---------------------|

### 9.43.3.3 operator=() [2/2]

```
template<typename T >
FastSig& LinkPred::FastSig< T >::operator= (
    FastSig< T > const & that ) [default]
```

Copy assignment operator.

#### Parameters

|             |                     |
|-------------|---------------------|
| <i>that</i> | The object to copy. |
|-------------|---------------------|

The documentation for this class was generated from the following file:

- [include/linkpred/numerical/mf/fastsig.hpp](#)

## 9.44 LinkPred::Simp::Evaluator::Factory::FBMParams Struct Reference

Parameters of FBM.

```
#include <evaluator.hpp>
```

### Public Attributes

- int [maxIter](#) = 50
- long int [seed](#) = 0

### 9.44.1 Detailed Description

Parameters of FBM.

### 9.44.2 Member Data Documentation

#### 9.44.2.1 maxIter

```
int LinkPred::Simp::Evaluator::Factory::FBMParams::maxIter = 50
```

Max iterations for FBM.

#### 9.44.2.2 seed

```
long int LinkPred::Simp::Evaluator::Factory::FBMParams::seed = 0
```

Seed for FBM.

The documentation for this struct was generated from the following file:

- [include/linkpred/simp/evaluator.hpp](#)

## 9.45 LinkPred::GCurve< PredResultsT > Class Template Reference

General performance curve.

```
#include <perfmeasure.hpp>
```

Inheritance diagram for LinkPred::GCurve< PredResultsT >:

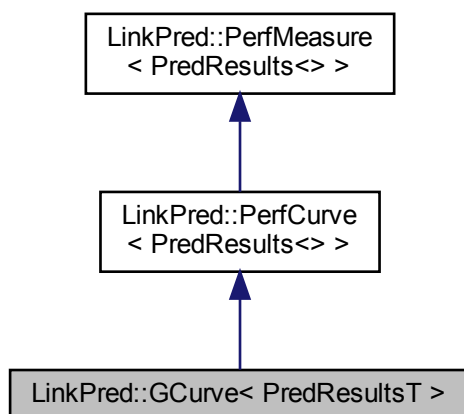

Collaboration diagram for LinkPred::GCurve< PredResultsT >:

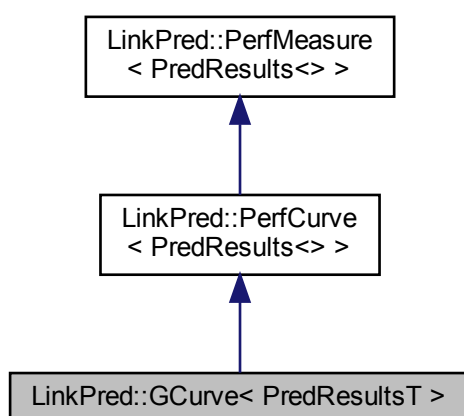

### Public Types

- using `ScoresItT` = typename `PerfMeasure< PredResultsT >::ScoresItT`

## Public Member Functions

- [GCurve](#) (typename [PerfLambda::PerfLambdaT](#) const &xLambda, typename [PerfLambda::PerfLambdaT](#) const &yLambda)
- [GCurve](#) (typename [PerfLambda::PerfLambdaT](#) const &xLambda, typename [PerfLambda::PerfLambdaT](#) const &yLambda, std::string name)
- [GCurve](#) ([GCurve](#) const &that)=default
- [GCurve](#) & operator= ([GCurve](#) const &that)=default
- [GCurve](#) ([GCurve](#) &&that)=default
- [GCurve](#) & operator= ([GCurve](#) &&that)=default
- virtual void [eval](#) (std::shared\_ptr< [PredResultsT](#) > &predResults, [PerfResults](#) &results)
- virtual void [eval](#) ([ScoresItT](#) posScoresBegin, [ScoresItT](#) posScoresEnd, [ScoresItT](#) negScoresBegin, [ScoresItT](#) negScoresEnd, [SortOrder](#) &posSortOrder, [SortOrder](#) &negSortOrder, [PerfResults](#) &results)
- template<typename [ScoresItT](#) >  
std::vector< std::pair< double, double > > [getGCurve](#) ([ScoresItT](#) posScoresBegin, [ScoresItT](#) posScores↵  
End, [ScoresItT](#) negScoresBegin, [ScoresItT](#) negScoresEnd, bool parallel=false)
- virtual std::vector< std::pair< double, double > > [getCurve](#) (std::shared\_ptr< [PredResultsT](#) > &pred↵  
Results)
- virtual std::vector< std::pair< double, double > > [getCurve](#) ([ScoresItT](#) posScoresBegin, [ScoresItT](#) pos↵  
ScoresEnd, [ScoresItT](#) negScoresBegin, [ScoresItT](#) negScoresEnd, [SortOrder](#) &posSortOrder, [SortOrder](#) &negSortOrder)
- virtual [~GCurve](#) ()=default

## Static Public Member Functions

- template<typename [ScoresItT](#) >  
static std::vector< double > [getThresholds](#) ([ScoresItT](#) posScoresBegin, [ScoresItT](#) posScoresEnd, [ScoresItT](#) negScoresBegin, [ScoresItT](#) negScoresEnd)
- static double [getGCurveAuc](#) (std::vector< std::pair< double, double > > const &curve, bool parallel=false)

### 9.45.1 Detailed Description

```
template<typename PredResultsT = PredResults<>>
class LinkPred::GCurve< PredResultsT >
```

General performance curve.

Template Parameters

|                                     |                              |
|-------------------------------------|------------------------------|
| <i><a href="#">PredResultsT</a></i> | The prediction results type. |
|-------------------------------------|------------------------------|

### 9.45.2 Member Typedef Documentation

#### 9.45.2.1 [ScoresItT](#)

```
template<typename PredResultsT = PredResults<>>
using LinkPred::GCurve< PredResultsT >::ScoresItT = typename PerfMeasure<PredResultsT>↵  
::ScoresItT
```



Scores iterator type.

### 9.45.3 Constructor & Destructor Documentation

#### 9.45.3.1 GCurve() [1/4]

```
template<typename PredResultsT = PredResults<>>
LinkPred::GCurve< PredResultsT >::GCurve (
    typename PerfLambda::PerfLambdaT const & xLambda,
    typename PerfLambda::PerfLambdaT const & yLambda ) [inline]
```

Constructor.

Parameters

|                |                                        |
|----------------|----------------------------------------|
| <i>xLambda</i> | A lambda to compute the x-coordinates. |
| <i>yLambda</i> | A lambda to compute the y-coordinates. |

#### 9.45.3.2 GCurve() [2/4]

```
template<typename PredResultsT = PredResults<>>
LinkPred::GCurve< PredResultsT >::GCurve (
    typename PerfLambda::PerfLambdaT const & xLambda,
    typename PerfLambda::PerfLambdaT const & yLambda,
    std::string name ) [inline]
```

Constructor.

Parameters

|                |                                        |
|----------------|----------------------------------------|
| <i>xLambda</i> | A lambda to compute the x-coordinates. |
| <i>yLambda</i> | A lambda to compute the y-coordinates. |
| <i>name</i>    | The name of the performance measure.   |

#### 9.45.3.3 GCurve() [3/4]

```
template<typename PredResultsT = PredResults<>>
LinkPred::GCurve< PredResultsT >::GCurve (
    GCurve< PredResultsT > const & that ) [default]
```

Copy constructor.

## Parameters

|             |                     |
|-------------|---------------------|
| <i>that</i> | The object to copy. |
|-------------|---------------------|

**9.45.3.4 GCurve()** [4/4]

```
template<typename PredResultsT = PredResults<>>
LinkPred::GCurve< PredResultsT >::GCurve (
    GCurve< PredResultsT > && that ) [default]
```

Move constructor.

## Parameters

|             |                     |
|-------------|---------------------|
| <i>that</i> | The object to move. |
|-------------|---------------------|

**9.45.3.5 ~GCurve()**

```
template<typename PredResultsT = PredResults<>>
virtual LinkPred::GCurve< PredResultsT >::~~GCurve ( ) [virtual], [default]
```

Destructor.

**9.45.4 Member Function Documentation****9.45.4.1 eval()** [1/2]

```
template<typename PredResultsT = PredResults<>>
virtual void LinkPred::GCurve< PredResultsT >::eval (
    ScoresItT posScoresBegin,
    ScoresItT posScoresEnd,
    ScoresItT negScoresBegin,
    ScoresItT negScoresEnd,
    SortOrder & posSortOrder,
    SortOrder & negSortOrder,
    PerfResults & results ) [inline], [virtual]
```

Computes the area under the curve.

## Parameters

|                       |                                       |
|-----------------------|---------------------------------------|
| <i>posScoresBegin</i> | Iterator to the first positive score. |
|-----------------------|---------------------------------------|

## Parameters

|                       |                                                                           |
|-----------------------|---------------------------------------------------------------------------|
| <i>posScoresEnd</i>   | Iterator to one-past-the-last positive score.                             |
| <i>negScoresBegin</i> | Iterator to the first negative score.                                     |
| <i>negScoresEnd</i>   | Iterator to one-past-the-last negative score.                             |
| <i>posSortOrder</i>   | The sorting order of positive scores. This may be modified by the method. |
| <i>negSortOrder</i>   | The sorting order of negative scores. This may be modified by the method. |
| <i>results</i>        | To write results.                                                         |

## 9.45.4.2 eval() [2/2]

```
template<typename PredResultsT = PredResults<>>
virtual void LinkPred::GCurve< PredResultsT >::eval (
    std::shared_ptr< PredResultsT > & predResults,
    PerfResults & results ) [inline], [virtual]
```

Computes the area under the curve.

## Parameters

|                    |                            |
|--------------------|----------------------------|
| <i>predResults</i> | The prediction results.    |
| <i>results</i>     | Iterator to write results. |

## 9.45.4.3 getCurve() [1/2]

```
template<typename PredResultsT = PredResults<>>
virtual std::vector<std::pair<double, double> > LinkPred::GCurve< PredResultsT >::getCurve (
    ScoresItT posScoresBegin,
    ScoresItT posScoresEnd,
    ScoresItT negScoresBegin,
    ScoresItT negScoresEnd,
    SortOrder & posSortOrder,
    SortOrder & negSortOrder ) [inline], [virtual]
```

Computes the performance curve.

## Parameters

|                       |                                                                           |
|-----------------------|---------------------------------------------------------------------------|
| <i>posScoresBegin</i> | Iterator to the first positive score.                                     |
| <i>posScoresEnd</i>   | Iterator to one-past-the-last positive score.                             |
| <i>negScoresBegin</i> | Iterator to the first negative score.                                     |
| <i>negScoresEnd</i>   | Iterator to one-past-the-last negative score.                             |
| <i>posSortOrder</i>   | The sorting order of positive scores. This may be modified by the method. |
| <i>negSortOrder</i>   | The sorting order of negative scores. This may be modified by the method. |

**Returns**

A curve in the form of an `std::vector` of pairs representing the x and y coordinates.

**9.45.4.4 `getCurve()` [2/2]**

```
template<typename PredResultsT = PredResults<>>
virtual std::vector<std::pair<double, double> > LinkPred::GCurve< PredResultsT >::getCurve (
    std::shared_ptr< PredResultsT > & predResults ) [inline], [virtual]
```

Computes the performance curve.

**Parameters**

|                    |                         |
|--------------------|-------------------------|
| <i>predResults</i> | The prediction results. |
|--------------------|-------------------------|

**Returns**

A curve in the form of an `std::vector` of pairs representing the x and y coordinates.

**9.45.4.5 `getGCurve()`**

```
template<typename PredResultsT = PredResults<>>
template<typename ScoresItT >
std::vector<std::pair<double, double> > LinkPred::GCurve< PredResultsT >::getGCurve (
    ScoresItT posScoresBegin,
    ScoresItT posScoresEnd,
    ScoresItT negScoresBegin,
    ScoresItT negScoresEnd,
    bool parallel = false ) [inline]
```

Compute the curve. Both ranges must be sorted.

**Parameters**

|                       |                                               |
|-----------------------|-----------------------------------------------|
| <i>posScoresBegin</i> | Iterator to the first positive score.         |
| <i>posScoresEnd</i>   | Iterator to one-past-the-last positive score. |
| <i>negScoresBegin</i> | Iterator to the first negative score.         |
| <i>negScoresEnd</i>   | Iterator to one-past-the-last negative score. |
| <i>parallel</i>       | Whether to run in parallel.                   |

**9.45.4.6 `getGCurveAuc()`**

```
template<typename PredResultsT = PredResults<>>
```

```
static double LinkPred::GCurve< PredResultsT >::getGCurveAuc (
    std::vector< std::pair< double, double >> const & curve,
    bool parallel = false ) [inline], [static]
```

Computes the area under the curve using integration by linear interpolation.

#### Parameters

|                 |                                               |
|-----------------|-----------------------------------------------|
| <i>curve</i>    | The curve represented by its x-y coordinates. |
| <i>parallel</i> | Whether to run in parallel.                   |

#### Returns

The area under the curve.

#### 9.45.4.7 getThresholds()

```
template<typename PredResultsT = PredResults<>>
template<typename ScoresItT >
static std::vector<double> LinkPred::GCurve< PredResultsT >::getThresholds (
    ScoresItT posScoresBegin,
    ScoresItT posScoresEnd,
    ScoresItT negScoresBegin,
    ScoresItT negScoresEnd ) [inline], [static]
```

Compute the threshold of the [GCurve](#) curve. Ranges must be sorted in increasing order.

#### Parameters

|                       |                                               |
|-----------------------|-----------------------------------------------|
| <i>posScoresBegin</i> | Iterator to the first positive score.         |
| <i>posScoresEnd</i>   | Iterator to one-past-the-last positive score. |
| <i>negScoresBegin</i> | Iterator to the first negative score.         |
| <i>negScoresEnd</i>   | Iterator to one-past-the-last negative score. |

#### 9.45.4.8 operator=() [1/2]

```
template<typename PredResultsT = PredResults<>>
GCurve& LinkPred::GCurve< PredResultsT >::operator= (
    GCurve< PredResultsT > && that ) [default]
```

Move assignment operator.

#### Parameters

|             |                     |
|-------------|---------------------|
| <i>that</i> | The object to move. |
|-------------|---------------------|

#### 9.45.4.9 operator=() [2/2]

```
template<typename PredResultsT = PredResults<>>
GCurve& LinkPred::GCurve< PredResultsT >::operator= (
    GCurve< PredResultsT > const & that ) [default]
```

Copy assignment operator.

##### Parameters

|             |                     |
|-------------|---------------------|
| <i>that</i> | The object to copy. |
|-------------|---------------------|

The documentation for this class was generated from the following file:

- include/linkpred/perf/perfmeasure.hpp

## 9.46 LinkPred::GFMatrix Class Reference

Generalized full matrix. The storage scheme used is column-major.

```
#include <gfmatrix.hpp>
```

### Public Member Functions

- [GFMatrix](#) ()=delete
- [GFMatrix](#) (int m, int n, bool initZero=false)
- [GFMatrix](#) ([GFMatrix](#) const &that)
- [GFMatrix](#) & [operator=](#) ([GFMatrix](#) const &that)
- [GFMatrix](#) ([GFMatrix](#) &&that)
- [GFMatrix](#) & [operator=](#) ([GFMatrix](#) &&that)
- bool [operator==](#) (const [GFMatrix](#) &that) const
- bool [operator!=](#) (const [GFMatrix](#) &that) const
- void [set](#) (int i, int j, double v)
- double [get](#) (int i, int j) const
- void [setRow](#) (int i, [Vec](#) const &vec)
- [Vec](#) [getRow](#) (int i) const
- void [setCol](#) (int j, [Vec](#) const &vec)
- [Vec](#) [getCol](#) (int j) const
- [GFMatrix](#) [getRows](#) (std::vector< int > const &rowInd) const
- [GFMatrix](#) [getCols](#) (std::vector< int > const &colInd) const
- [Vec](#) [sumCols](#) () const
- [Vec](#) [sumRows](#) () const
- double [sum](#) ()
- void [print](#) () const
- void [print](#) (std::string name) const
- [Vec](#) [diag](#) () const
- void [setDiag](#) (double v)
- void [removeNaN](#) ()
- int [getM](#) () const
- int [getN](#) () const
- std::string [getName](#) () const
- void [setName](#) (const std::string &name)
- virtual [~GFMatrix](#) ()

## Static Public Member Functions

- static [GFMMatrix mult](#) ([GFMMatrix](#) const &mat1, [GFMMatrix](#) const &mat2, bool trans1=false, bool trans2=false)
- static [GFMMatrix elemMult](#) ([GFMMatrix](#) const &mat1, [GFMMatrix](#) const &mat2)
- static [GFMMatrix mult](#) ([Vec](#) const &v1, [Vec](#) const &v2)

## Friends

- [Vec operator\\*](#) (const [GFMMatrix](#) &mat, const [Vec](#) &vec)
- [GFMMatrix operator\\*](#) (const [GFMMatrix](#) &mat1, const [GFMMatrix](#) &mat2)
- [GFMMatrix operator+](#) (const [GFMMatrix](#) &mat1, const [GFMMatrix](#) &mat2)
- [GFMMatrix operator-](#) (const [GFMMatrix](#) &mat1, const [GFMMatrix](#) &mat2)
- [GFMMatrix operator/](#) (const [GFMMatrix](#) &mat1, const [GFMMatrix](#) &mat2)
- [GFMMatrix operator+](#) (const [GFMMatrix](#) &mat1, const [Vec](#) &mat2)
- [GFMMatrix operator+](#) (const [Vec](#) &mat1, const [GFMMatrix](#) &mat2)
- [GFMMatrix operator-](#) (const [GFMMatrix](#) &mat1, const [Vec](#) &mat2)
- [GFMMatrix operator-](#) (const [Vec](#) &mat1, const [GFMMatrix](#) &mat2)
- [GFMMatrix operator\\*](#) (double a, const [GFMMatrix](#) &mat)
- [GFMMatrix operator\\*](#) (const [GFMMatrix](#) &mat, double a)
- [GFMMatrix operator+](#) (double a, const [GFMMatrix](#) &mat)
- [GFMMatrix operator+](#) (const [GFMMatrix](#) &mat, double a)
- [GFMMatrix operator-](#) (double a, const [GFMMatrix](#) &mat)
- [GFMMatrix operator-](#) (const [GFMMatrix](#) &mat, double a)

### 9.46.1 Detailed Description

Generalized full matrix. The storage scheme used is column-major.

### 9.46.2 Constructor & Destructor Documentation

#### 9.46.2.1 GFMatrix() [1/4]

```
LinkPred::GFMatrix::GFMatrix ( ) [delete]
```

Default constructor.

#### 9.46.2.2 GFMatrix() [2/4]

```
LinkPred::GFMatrix::GFMatrix (
    int m,
    int n,
    bool initZero = false )
```

Constructor.

## Parameters

|                 |                                                    |
|-----------------|----------------------------------------------------|
| <i>m</i>        | The number of rows.                                |
| <i>n</i>        | The number of columns.                             |
| <i>initZero</i> | If set to true, the matrix is initialized to zero. |

**9.46.2.3 GFMatrix()** [3/4]

```
LinkPred::GFMatrix::GFMatrix (
    GFMatrix const & that )
```

Copy constructor.

## Parameters

|             |                     |
|-------------|---------------------|
| <i>that</i> | The object to copy. |
|-------------|---------------------|

**9.46.2.4 GFMatrix()** [4/4]

```
LinkPred::GFMatrix::GFMatrix (
    GFMatrix && that )
```

Move constructor.

## Parameters

|             |                     |
|-------------|---------------------|
| <i>that</i> | The object to move. |
|-------------|---------------------|

**9.46.2.5 ~GFMatrix()**

```
virtual LinkPred::GFMatrix::~~GFMatrix ( ) [virtual]
```

Destructor.

**9.46.3 Member Function Documentation**



### 9.46.3.1 diag()

```
Vec LinkPred::GFMatrix::diag ( ) const
```

#### Returns

The diagonal of the matrix.

### 9.46.3.2 elemMult()

```
static GFMatrix LinkPred::GFMatrix::elemMult (
    GFMatrix const & mat1,
    GFMatrix const & mat2 ) [static]
```

Element-wise matrix multiplication.

#### Parameters

|             |                |
|-------------|----------------|
| <i>mat1</i> | First matrix.  |
| <i>mat2</i> | Second matrix. |

#### Returns

The resulting matrix.

### 9.46.3.3 get()

```
double LinkPred::GFMatrix::get (
    int i,
    int j ) const [inline]
```

Get a matrix entry.

#### Parameters

|          |               |
|----------|---------------|
| <i>i</i> | Row index.    |
| <i>j</i> | Column index. |

### 9.46.3.4 getCol()

```
Vec LinkPred::GFMatrix::getCol (
    int j ) const
```

**Parameters**

|          |                   |
|----------|-------------------|
| <i>j</i> | The column index. |
|----------|-------------------|

**Returns**

The column vector *j*.

**9.46.3.5 getCols()**

```
GFMatrix LinkPred::GFMatrix::getCols (
    std::vector< int > const & colInd ) const
```

**Parameters**

|               |                     |
|---------------|---------------------|
| <i>colInd</i> | The column indexes. |
|---------------|---------------------|

**Returns**

The matrix composed from the specified columns.

**9.46.3.6 getM()**

```
int LinkPred::GFMatrix::getM ( ) const [inline]
```

**Returns**

The number of rows.

**9.46.3.7 getN()**

```
int LinkPred::GFMatrix::getN ( ) const [inline]
```

**Returns**

The number of columns.

### 9.46.3.8 getName()

```
std::string LinkPred::GFMatrix::getName ( ) const [inline]
```

#### Returns

The name of the matrix.

### 9.46.3.9 getRow()

```
Vec LinkPred::GFMatrix::getRow (
    int i ) const
```

#### Parameters

|          |                |
|----------|----------------|
| <i>i</i> | The row index. |
|----------|----------------|

#### Returns

The row vector *i*.

### 9.46.3.10 getRows()

```
GFMatrix LinkPred::GFMatrix::getRows (
    std::vector< int > const & rowInd ) const
```

#### Parameters

|               |                  |
|---------------|------------------|
| <i>rowInd</i> | The row indexes. |
|---------------|------------------|

#### Returns

The matrix composed from the specified rows.

### 9.46.3.11 mult() [1/2]

```
static GFMatrix LinkPred::GFMatrix::mult (
    GFMatrix const & mat1,
    GFMatrix const & mat2,
    bool trans1 = false,
    bool trans2 = false ) [static]
```

Matrix-matrix multiplication with possibility of transposing.

## Parameters

|               |                   |
|---------------|-------------------|
| <i>mat1</i>   | First matrix.     |
| <i>mat2</i>   | Second matrix.    |
| <i>trans1</i> | Transposing mat1. |
| <i>trans2</i> | Transposing mat2. |

## Returns

The resulting matrix.

**9.46.3.12** `mult()` [2/2]

```
static GFMatrix LinkPred::GFMatrix::mult (  
    Vec const & v1,  
    Vec const & v2 ) [static]
```

Vector'-Vector multiplication.

## Parameters

|           |                |
|-----------|----------------|
| <i>v1</i> | First vector.  |
| <i>v2</i> | Second vector. |

## Returns

The resulting matrix.

**9.46.3.13** `operator"!=()`

```
bool LinkPred::GFMatrix::operator!= (  
    const GFMatrix & that ) const
```

## Parameters

|             |                   |
|-------------|-------------------|
| <i>that</i> | The other matrix. |
|-------------|-------------------|

## Returns

True if the two matrices are not equal.

#### 9.46.3.14 operator=() [1/2]

```
GFMatrix& LinkPred::GFMatrix::operator= (
    GFMatrix && that )
```

Move assignment operator.

##### Parameters

|             |                     |
|-------------|---------------------|
| <i>that</i> | The object to move. |
|-------------|---------------------|

#### 9.46.3.15 operator=() [2/2]

```
GFMatrix& LinkPred::GFMatrix::operator= (
    GFMatrix const & that )
```

Copy assignment operator.

##### Parameters

|             |                     |
|-------------|---------------------|
| <i>that</i> | The object to copy. |
|-------------|---------------------|

#### 9.46.3.16 operator==( )

```
bool LinkPred::GFMatrix::operator== (
    const GFMatrix & that ) const
```

##### Parameters

|             |                   |
|-------------|-------------------|
| <i>that</i> | The other matrix. |
|-------------|-------------------|

##### Returns

True if the two matrices are equal.

#### 9.46.3.17 print() [1/2]

```
void LinkPred::GFMatrix::print ( ) const
```

Print matrix to standard output.

### 9.46.3.18 print() [2/2]

```
void LinkPred::GFMatrix::print (
    std::string name ) const
```

Print matrix to standard output adding the name.

#### Parameters

|             |                           |
|-------------|---------------------------|
| <i>name</i> | Name added to the output. |
|-------------|---------------------------|

### 9.46.3.19 removeNaN()

```
void LinkPred::GFMatrix::removeNaN ( )
```

Remove NaN entries.

### 9.46.3.20 set()

```
void LinkPred::GFMatrix::set (
    int i,
    int j,
    double v ) [inline]
```

Set a matrix entry.

#### Parameters

|          |                |
|----------|----------------|
| <i>i</i> | Row index.     |
| <i>j</i> | Column index.  |
| <i>v</i> | The new value. |

### 9.46.3.21 setCol()

```
void LinkPred::GFMatrix::setCol (
    int j,
    Vec const & vec )
```

Set column vector.

#### Parameters

|            |                           |
|------------|---------------------------|
| <i>j</i>   | The column index.         |
| <i>vec</i> | The column vector to set. |

### 9.46.3.22 setDiag()

```
void LinkPred::GFMatrix::setDiag (
    double v )
```

Set diagonal.

#### Parameters

|          |                                      |
|----------|--------------------------------------|
| <i>v</i> | The value to be put in the diagonal. |
|----------|--------------------------------------|

### 9.46.3.23 setName()

```
void LinkPred::GFMatrix::setName (
    const std::string & name ) [inline]
```

Set the name of the matrix.

#### Parameters

|             |                      |
|-------------|----------------------|
| <i>name</i> | The new matrix name. |
|-------------|----------------------|

### 9.46.3.24 setRow()

```
void LinkPred::GFMatrix::setRow (
    int i,
    Vec const & vec )
```

Set row vector.

#### Parameters

|            |                        |
|------------|------------------------|
| <i>i</i>   | The row index.         |
| <i>vec</i> | The row vector to set. |

### 9.46.3.25 sum()

```
double LinkPred::GFMatrix::sum ( )
```

**Returns**

The sum of all elements.

**9.46.3.26 sumCols()**

```
Vec LinkPred::GFMatrix::sumCols ( ) const
```

**Returns**

The sum of the columns of the matrix.

**9.46.3.27 sumRows()**

```
Vec LinkPred::GFMatrix::sumRows ( ) const
```

**Returns**

The sum of the rows of the matrix.

**9.46.4 Friends And Related Function Documentation****9.46.4.1 operator\* [1/4]**

```
Vec operator* (
    const GFMatrix & mat,
    const Vec & vec ) [friend]
```

GFMatrix-vector multiplication.

**Parameters**

|            |                                                   |
|------------|---------------------------------------------------|
| <i>mat</i> | The matrix.                                       |
| <i>vec</i> | The vector that will be multiplied by the matrix. |

**Returns**

The resulting vector.



#### 9.46.4.2 operator\* [2/4]

```
GFMatrix operator* (  
    const GFMatrix & mat,  
    double a ) [friend]
```

GFMatrix \* a.

##### Parameters

|            |                    |
|------------|--------------------|
| <i>mat</i> | The second matrix. |
| <i>a</i>   | scalar.            |

##### Returns

The resulting matrix.

#### 9.46.4.3 operator\* [3/4]

```
GFMatrix operator* (  
    const GFMatrix & mat1,  
    const GFMatrix & mat2 ) [friend]
```

GFMatrix \* GFMatrix.

##### Parameters

|             |                    |
|-------------|--------------------|
| <i>mat1</i> | The first matrix.  |
| <i>mat2</i> | The second matrix. |

##### Returns

The resulting matrix.

#### 9.46.4.4 operator\* [4/4]

```
GFMatrix operator* (  
    double a,  
    const GFMatrix & mat ) [friend]
```

a \* GFMatrix.

##### Parameters

|            |                    |
|------------|--------------------|
| <i>a</i>   | scalar.            |
| <i>mat</i> | The second matrix. |

**Returns**

The resulting matrix.

**9.46.4.5 operator+ [1/5]**

```
GFMMatrix operator+ (  
    const GFMMatrix & mat,  
    double a ) [friend]
```

[GFMMatrix](#) + a.

**Parameters**

|            |                    |
|------------|--------------------|
| <i>mat</i> | The second matrix. |
| <i>a</i>   | A scalar.          |

**Returns**

The resulting matrix.

**9.46.4.6 operator+ [2/5]**

```
GFMMatrix operator+ (  
    const GFMMatrix & mat1,  
    const GFMMatrix & mat2 ) [friend]
```

[GFMMatrix](#) + [GFMMatrix](#).

**Parameters**

|             |                    |
|-------------|--------------------|
| <i>mat1</i> | The first matrix.  |
| <i>mat2</i> | The second matrix. |

**Returns**

The resulting matrix.

**9.46.4.7 operator+ [3/5]**

```
GFMMatrix operator+ (  
    const GFMMatrix & mat1,  
    const Vec & mat2 ) [friend]
```

[GFMMatrix](#) + [Vec](#).

## Parameters

|             |                               |
|-------------|-------------------------------|
| <i>mat1</i> | The first matrix.             |
| <i>mat2</i> | The second matrix (diagonal). |

## Returns

The resulting matrix.

**9.46.4.8 operator+ [4/5]**

```
GFMatrix operator+ (  
    const Vec & mat1,  
    const GFMatrix & mat2 ) [friend]
```

Vec + GFMatrix.

## Parameters

|             |                              |
|-------------|------------------------------|
| <i>mat1</i> | The first matrix (diagonal). |
| <i>mat2</i> | The second matrix.           |

## Returns

The resulting matrix.

**9.46.4.9 operator+ [5/5]**

```
GFMatrix operator+ (  
    double a,  
    const GFMatrix & mat ) [friend]
```

a + GFMatrix.

## Parameters

|            |                    |
|------------|--------------------|
| <i>a</i>   | scalar.            |
| <i>mat</i> | The second matrix. |

## Returns

The resulting matrix.

#### 9.46.4.10 operator- [1/5]

```
GFMMatrix operator- (
    const GFMMatrix & mat,
    double a ) [friend]
```

[GFMMatrix](#) - a.

##### Parameters

|            |                    |
|------------|--------------------|
| <i>mat</i> | The second matrix. |
| <i>a</i>   | scalar.            |

##### Returns

The resulting matrix.

#### 9.46.4.11 operator- [2/5]

```
GFMMatrix operator- (
    const GFMMatrix & mat1,
    const GFMMatrix & mat2 ) [friend]
```

[GFMMatrix](#) - [GFMMatrix](#).

##### Parameters

|             |                    |
|-------------|--------------------|
| <i>mat1</i> | The first matrix.  |
| <i>mat2</i> | The second matrix. |

##### Returns

The resulting matrix.

#### 9.46.4.12 operator- [3/5]

```
GFMMatrix operator- (
    const GFMMatrix & mat1,
    const Vec & mat2 ) [friend]
```

[GFMMatrix](#) - [Vec](#).

##### Parameters

|             |                               |
|-------------|-------------------------------|
| <i>mat1</i> | The first matrix.             |
| <i>mat2</i> | The second matrix (diagonal). |

**Returns**

The resulting matrix.

**9.46.4.13 operator- [4/5]**

```
GFMatrix operator- (
    const Vec & mat1,
    const GFMatrix & mat2 ) [friend]
```

[Vec](#) - [GFMatrix](#).

**Parameters**

|             |                              |
|-------------|------------------------------|
| <i>mat1</i> | The first matrix (diagonal). |
| <i>mat2</i> | The second matrix.           |

**Returns**

The resulting matrix.

**9.46.4.14 operator- [5/5]**

```
GFMatrix operator- (
    double a,
    const GFMatrix & mat ) [friend]
```

[a](#) - [GFMatrix](#).

**Parameters**

|            |                    |
|------------|--------------------|
| <i>a</i>   | scalar.            |
| <i>mat</i> | The second matrix. |

**Returns**

The resulting matrix.

**9.46.4.15 operator/**

```
GFMatrix operator/ (
    const GFMatrix & mat1,
    const GFMatrix & mat2 ) [friend]
```

[GFMatrix](#) / [GFMatrix](#) (element-wise division).

## Parameters

|             |                    |
|-------------|--------------------|
| <i>mat1</i> | The first matrix.  |
| <i>mat2</i> | The second matrix. |

## Returns

The resulting matrix.

The documentation for this class was generated from the following file:

- [include/linkpred/numerical/linear/gfmatrix.hpp](#)

## 9.47 LinkPred::GraphTraversal< Network, NodeProcessor > Class Template Reference

Graph traversal interface.

```
#include <graphtraversal.hpp>
```

### Public Member Functions

- [GraphTraversal](#) (std::shared\_ptr< Network const > net)
- [GraphTraversal](#) ([GraphTraversal](#) const &that)=default
- [GraphTraversal](#) & operator= ([GraphTraversal](#) const &that)=default
- [GraphTraversal](#) ([GraphTraversal](#) &&that)=default
- [GraphTraversal](#) & operator= ([GraphTraversal](#) &&that)=default
- virtual void [traverse](#) (typename Network::NodeID srcNode, NodeProcessor &processor)=0
- virtual [~GraphTraversal](#) ()=default

### 9.47.1 Detailed Description

```
template<typename Network = UNetwork<>, typename NodeProcessor = Collector< Network>>
class LinkPred::GraphTraversal< Network, NodeProcessor >
```

Graph traversal interface.

## Template Parameters

|                      |                          |
|----------------------|--------------------------|
| <i>Network</i>       | The network type.        |
| <i>NodeProcessor</i> | The node processor type. |

### 9.47.2 Constructor & Destructor Documentation

**9.47.2.1 GraphTraversal()** [1/3]

```
template<typename Network = UNetwork<>, typename NodeProcessor = Collector< Network>>
LinkPred::GraphTraversal< Network, NodeProcessor >::GraphTraversal (
    std::shared_ptr< Network const > net ) [inline]
```

Constructor.

Parameters

|            |                                         |
|------------|-----------------------------------------|
| <i>net</i> | The network on which traversal is done. |
|------------|-----------------------------------------|

**9.47.2.2 GraphTraversal()** [2/3]

```
template<typename Network = UNetwork<>, typename NodeProcessor = Collector< Network>>
LinkPred::GraphTraversal< Network, NodeProcessor >::GraphTraversal (
    GraphTraversal< Network, NodeProcessor > const & that ) [default]
```

Copy constructor.

Parameters

|             |                     |
|-------------|---------------------|
| <i>that</i> | The object to copy. |
|-------------|---------------------|

**9.47.2.3 GraphTraversal()** [3/3]

```
template<typename Network = UNetwork<>, typename NodeProcessor = Collector< Network>>
LinkPred::GraphTraversal< Network, NodeProcessor >::GraphTraversal (
    GraphTraversal< Network, NodeProcessor > && that ) [default]
```

Move constructor.

Parameters

|             |                     |
|-------------|---------------------|
| <i>that</i> | The object to move. |
|-------------|---------------------|

**9.47.2.4 ~GraphTraversal()**

```
template<typename Network = UNetwork<>, typename NodeProcessor = Collector< Network>>
virtual LinkPred::GraphTraversal< Network, NodeProcessor >::~~GraphTraversal ( ) [virtual],
[default]
```

Destructor.

## 9.47.3 Member Function Documentation

### 9.47.3.1 operator=() [1/2]

```
template<typename Network = UNetwork<>, typename NodeProcessor = Collector< Network>>
GraphTraversal& LinkPred::GraphTraversal< Network, NodeProcessor >::operator= (
    GraphTraversal< Network, NodeProcessor > && that ) [default]
```

Move assignment operator.

#### Parameters

|             |                     |
|-------------|---------------------|
| <i>that</i> | The object to move. |
|-------------|---------------------|

### 9.47.3.2 operator=() [2/2]

```
template<typename Network = UNetwork<>, typename NodeProcessor = Collector< Network>>
GraphTraversal& LinkPred::GraphTraversal< Network, NodeProcessor >::operator= (
    GraphTraversal< Network, NodeProcessor > const & that ) [default]
```

Copy assignment operator.

#### Parameters

|             |                     |
|-------------|---------------------|
| <i>that</i> | The object to copy. |
|-------------|---------------------|

### 9.47.3.3 traverse()

```
template<typename Network = UNetwork<>, typename NodeProcessor = Collector< Network>>
virtual void LinkPred::GraphTraversal< Network, NodeProcessor >::traverse (
    typename Network::NodeID srcNode,
    NodeProcessor & processor ) [pure virtual]
```

Traverse the graph.

#### Parameters

|                  |                     |
|------------------|---------------------|
| <i>srcNode</i>   | The source node.    |
| <i>processor</i> | The node processor. |

The documentation for this class was generated from the following file:



- [include/linkpred/graphalg/traversal/graphtraversal.hpp](#)

## 9.48 LinkPred::HMSM< Network > Class Template Reference

Contains the implementation of an algorithm for embedding a network using a a hidden metric space model. Reference: R. Alharbi, H. Benhidour, and S. Kerrache. "Link Prediction in Complex Net-works Based on a Hidden Variables Model". In: 2016 UKSim-AMSS 18th Inter-national Conference on Computer Modelling and Simulation (UKSim). 2016,pages 119–124.

```
#include <hmsm.hpp>
```

Inheritance diagram for LinkPred::HMSM< Network >:

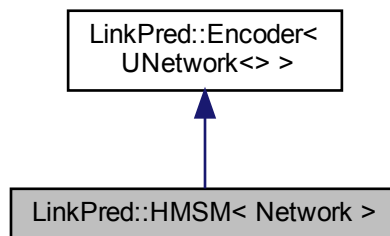

Collaboration diagram for LinkPred::HMSM< Network >:

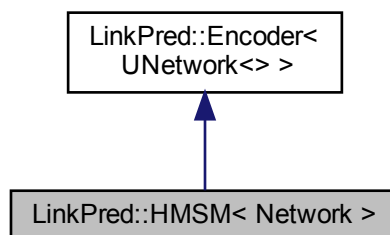

### Public Member Functions

- [HMSM](#) (std::shared\_ptr< Network const > net, long int seed)
- [HMSM](#) ([HMSM](#) const &that)=default
- [HMSM](#) & [operator=](#) ([HMSM](#) const &that)=default
- [HMSM](#) ([HMSM](#) &&that)=default

- `HMSM & operator= (HMSM &&that)=default`
- `virtual void init ()`
- `virtual void encode ()`
- `virtual void setWeightMap (const WeightMapSP &weightMap)`
- `const int getDefaultDim () const`
- `double getAlpha () const`
- `void setAlpha (double alpha)`
- `double getEps () const`
- `void setEps (double eps)`
- `double getHProb () const`
- `void setHProb (double hProb)`
- `double getLProb () const`
- `void setProb (double lProb)`
- `int getNbMdsRuns () const`
- `void setNbMdsRuns (int nbMdsRuns)`
- `double getTol () const`
- `void setTol (double tol)`
- `virtual ~HMSM ()=default`

## Additional Inherited Members

### 9.48.1 Detailed Description

```
template<typename Network = UNetwork<>>
class LinkPred::HMSM< Network >
```

Contains the implementation of an algorithm for embedding a network using a a hidden metric space model. Reference: R. Alharbi, H. Benhidour, and S. Kerrache. "Link Prediction in Complex Net-works Based on a Hidden Variables Model". In: 2016 UKSim-AMSS 18th Inter-national Conference on Computer Modelling and Simulation (UKSim). 2016,pages 119–124.

#### Template Parameters

|                |                   |
|----------------|-------------------|
| <i>Network</i> | The network type. |
|----------------|-------------------|

### 9.48.2 Constructor & Destructor Documentation

#### 9.48.2.1 HMSM() [1/3]

```
template<typename Network = UNetwork<>>
LinkPred::HMSM< Network >::HMSM (
    std::shared_ptr< Network const > net,
    long int seed ) [inline]
```

Constructor.

## Parameters

|             |                               |
|-------------|-------------------------------|
| <i>net</i>  | The network.                  |
| <i>seed</i> | Random number generator seed. |

**9.48.2.2 HMSM()** [2/3]

```
template<typename Network = UNetwork<>>
LinkPred::HMSM< Network >::HMSM (
    HMSM< Network > const & that ) [default]
```

Copy constructor.

## Parameters

|             |                     |
|-------------|---------------------|
| <i>that</i> | The object to copy. |
|-------------|---------------------|

**9.48.2.3 HMSM()** [3/3]

```
template<typename Network = UNetwork<>>
LinkPred::HMSM< Network >::HMSM (
    HMSM< Network > && that ) [default]
```

Move constructor.

## Parameters

|             |                     |
|-------------|---------------------|
| <i>that</i> | The object to move. |
|-------------|---------------------|

**9.48.2.4 ~HMSM()**

```
template<typename Network = UNetwork<>>
virtual LinkPred::HMSM< Network >::~~HMSM ( ) [virtual], [default]
```

Destructor.

**9.48.3 Member Function Documentation**

### 9.48.3.1 encode()

```
template<typename Network = UNetwork<>>
virtual void LinkPred::HMSM< Network >::encode ( ) [virtual]
```

Encode the network.

Implements [LinkPred::Encoder< UNetwork<> >](#).

### 9.48.3.2 getAlpha()

```
template<typename Network = UNetwork<>>
double LinkPred::HMSM< Network >::getAlpha ( ) const [inline]
```

#### Returns

The parameter alpha of the [HMSM](#) model.

### 9.48.3.3 getDefaultDim()

```
template<typename Network = UNetwork<>>
const int LinkPred::HMSM< Network >::getDefaultDim ( ) const [inline]
```

#### Returns

The default embedding dimension.

### 9.48.3.4 getEps()

```
template<typename Network = UNetwork<>>
double LinkPred::HMSM< Network >::getEps ( ) const [inline]
```

#### Returns

Degree product when of the nodes has degree 0.

### 9.48.3.5 getHProb()

```
template<typename Network = UNetwork<>>
double LinkPred::HMSM< Network >::getHProb ( ) const [inline]
```

Probability assigned to connected couples.

### 9.48.3.6 getLProb()

```
template<typename Network = UNetwork<>>
double LinkPred::HMSM< Network >::getLProb ( ) const [inline]
```

Probability assigned to disconnected couples.

### 9.48.3.7 getNbMdsRuns()

```
template<typename Network = UNetwork<>>
int LinkPred::HMSM< Network >::getNbMdsRuns ( ) const [inline]
```

#### Returns

The number of times [MDS](#) is run (with default starting point).

### 9.48.3.8 getTol()

```
template<typename Network = UNetwork<>>
double LinkPred::HMSM< Network >::getTol ( ) const [inline]
```

#### Returns

Tolerance for stopping the [MDS](#) optimization problem.

### 9.48.3.9 init()

```
template<typename Network = UNetwork<>>
virtual void LinkPred::HMSM< Network >::init ( ) [virtual]
```

Initialize encoder.

Implements [LinkPred::Encoder< UNetwork<>>](#) .

### 9.48.3.10 operator=() [1/2]

```
template<typename Network = UNetwork<>>
HMSM& LinkPred::HMSM< Network >::operator= (
    HMSM< Network > && that ) [default]
```

Move assignment operator.

## Parameters

|             |                     |
|-------------|---------------------|
| <i>that</i> | The object to move. |
|-------------|---------------------|

**9.48.3.11 operator=()** [2/2]

```
template<typename Network = UNetwork<>>
HMSM& LinkPred::HMSM< Network >::operator= (
    HMSM< Network > const & that ) [default]
```

Copy assignment operator.

## Parameters

|             |                     |
|-------------|---------------------|
| <i>that</i> | The object to copy. |
|-------------|---------------------|

**9.48.3.12 setAlpha()**

```
template<typename Network = UNetwork<>>
void LinkPred::HMSM< Network >::setAlpha (
    double alpha ) [inline]
```

Set the parameter alpha of the [HMSM](#) model.

## Parameters

|              |                                                        |
|--------------|--------------------------------------------------------|
| <i>alpha</i> | The parameter alpha of the <a href="#">HMSM</a> model. |
|--------------|--------------------------------------------------------|

**9.48.3.13 setEps()**

```
template<typename Network = UNetwork<>>
void LinkPred::HMSM< Network >::setEps (
    double eps ) [inline]
```

Set degree product when of the nodes has degree 0.

## Parameters

|            |                                                |
|------------|------------------------------------------------|
| <i>eps</i> | Degree product when of the nodes has degree 0. |
|------------|------------------------------------------------|

### 9.48.3.14 setHProb()

```
template<typename Network = UNetwork<>>
void LinkPred::HMSM< Network >::setHProb (
    double hProb ) [inline]
```

Set the probability assigned to connected couples.

#### Parameters

|              |                                            |
|--------------|--------------------------------------------|
| <i>hProb</i> | Probability assigned to connected couples. |
|--------------|--------------------------------------------|

### 9.48.3.15 setNbMdsRuns()

```
template<typename Network = UNetwork<>>
void LinkPred::HMSM< Network >::setNbMdsRuns (
    int nbMdsRuns ) [inline]
```

Set the number of times **MDS** is run (with default starting point).

#### Parameters

|                  |                                                                  |
|------------------|------------------------------------------------------------------|
| <i>nbMdsRuns</i> | Number of times <b>MDS</b> is run (with default starting point). |
|------------------|------------------------------------------------------------------|

### 9.48.3.16 setProb()

```
template<typename Network = UNetwork<>>
void LinkPred::HMSM< Network >::setProb (
    double lProb ) [inline]
```

Set the probability assigned to disconnected couples.

#### Parameters

|              |                                               |
|--------------|-----------------------------------------------|
| <i>lProb</i> | Probability assigned to disconnected couples. |
|--------------|-----------------------------------------------|

### 9.48.3.17 setTol()

```
template<typename Network = UNetwork<>>
void LinkPred::HMSM< Network >::setTol (
    double tol ) [inline]
```

Set the tolerance for stopping the **MDS** optimization problem.

## Parameters

|            |                                                                      |
|------------|----------------------------------------------------------------------|
| <i>tol</i> | Tolerance for stopping the <a href="#">MDS</a> optimization problem. |
|------------|----------------------------------------------------------------------|

**9.48.3.18 setWeightMap()**

```
template<typename Network = UNetwork<>>
virtual void LinkPred::HMSM< Network >::setWeightMap (
    const WeightMapSP & weightMap ) [inline], [virtual]
```

Set edge weight map.

## Parameters

|                  |                  |
|------------------|------------------|
| <i>weightMap</i> | Edge weight map. |
|------------------|------------------|

Reimplemented from [LinkPred::Encoder< UNetwork<> >](#).

The documentation for this class was generated from the following file:

- [include/linkpred/graphalg/encoders/hmsm/hmsm.hpp](#)

**9.49 LinkPred::Simp::Evaluator::Factory::HRGParams Struct Reference**

Parameters of HRG.

```
#include <evaluator.hpp>
```

**Public Attributes**

- int [nbBeans](#) = 25
- int [nbSamples](#) = 10000
- long int [seed](#) = 0

**9.49.1 Detailed Description**

Parameters of HRG.

**9.49.2 Member Data Documentation**



#### 9.49.2.1 nbBeans

```
int LinkPred::Simp::Evaluator::Factory::HRGParams::nbBeans = 25
```

Number of bins in edge statistics histogram in HRG.

#### 9.49.2.2 nbSamples

```
int LinkPred::Simp::Evaluator::Factory::HRGParams::nbSamples = 10000
```

Number of samples to take for predictions in HRG.

#### 9.49.2.3 seed

```
long int LinkPred::Simp::Evaluator::Factory::HRGParams::seed = 0
```

Seed for HRG

The documentation for this struct was generated from the following file:

- `include/linkpred/simp/evaluator.hpp`

## 9.50 LinkPred::Simp::Evaluator::Factory::HYPParams Struct Reference

Parameters of HYP.

```
#include <evaluator.hpp>
```

### Public Attributes

- double `m` = 1.5
- double `L` = 1
- double `gamma` = 2.1
- double `zeta` = 1
- double `T` = 0.8
- long int `seed` = 0

### 9.50.1 Detailed Description

Parameters of HYP.

### 9.50.2 Member Data Documentation

### 9.50.2.1 gamma

```
double LinkPred::Simp::Evaluator::Factory::HYPParams::gamma = 2.1
```

The power law exponent gamma (see the HYP algorithm description).

### 9.50.2.2 L

```
double LinkPred::Simp::Evaluator::Factory::HYPParams::L = 1
```

The parameter L (see the HYP algorithm description).

### 9.50.2.3 m

```
double LinkPred::Simp::Evaluator::Factory::HYPParams::m = 1.5
```

The parameter m (see the HYP algorithm description).

### 9.50.2.4 seed

```
long int LinkPred::Simp::Evaluator::Factory::HYPParams::seed = 0
```

The random number generator seed for HYP.

### 9.50.2.5 T

```
double LinkPred::Simp::Evaluator::Factory::HYPParams::T = 0.8
```

The parameter T (see the HYP algorithm description).

### 9.50.2.6 zeta

```
double LinkPred::Simp::Evaluator::Factory::HYPParams::zeta = 1
```

The parameter zeta (see the HYP algorithm description).

The documentation for this struct was generated from the following file:

- `include/linkpred/simp/evaluator.hpp`

## 9.51 LinkPred::Simp::Evaluator::Factory::KABParams Struct Reference

Parameters of KAB.

```
#include <evaluator.hpp>
```

## Public Attributes

- int [horizLim](#) = 2

### 9.51.1 Detailed Description

Parameters of KAB.

### 9.51.2 Member Data Documentation

#### 9.51.2.1 horizLim

```
int LinkPred::Simp::Evaluator::Factory::KABParams::horizLim = 2
```

Horizon limit for KAB.

The documentation for this struct was generated from the following file:

- [include/linkpred/simp/evaluator.hpp](#)

## 9.52 LinkPred::L1Sim Class Reference

L1 similarity (negative the L1 norm or Manhattan distance).

```
#include <l1sim.hpp>
```

Inheritance diagram for LinkPred::L1Sim:

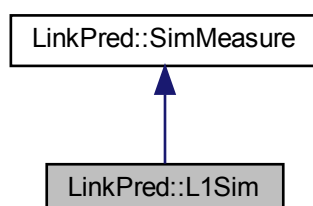

Collaboration diagram for LinkPred::L1Sim:

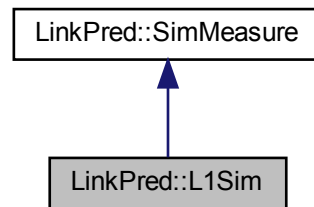

## Public Member Functions

- `L1Sim ()`
- `L1Sim (L1Sim const &that)=default`
- `L1Sim & operator= (L1Sim const &that)=default`
- `L1Sim (L1Sim &&that)=default`
- `L1Sim & operator= (L1Sim &&that)=default`
- virtual double `sim (Vec const &v1, Vec const &v2)`
- virtual `~L1Sim ()=default`

### 9.52.1 Detailed Description

L1 similarity (negative the L1 norm or Manhattan distance).

### 9.52.2 Constructor & Destructor Documentation

#### 9.52.2.1 L1Sim() [1/3]

```
LinkPred::L1Sim::L1Sim ( ) [inline]
```

Constructor.

#### 9.52.2.2 L1Sim() [2/3]

```
LinkPred::L1Sim::L1Sim (
    L1Sim const & that ) [default]
```

Copy constructor.

## Parameters

|             |                     |
|-------------|---------------------|
| <i>that</i> | The object to copy. |
|-------------|---------------------|

**9.52.2.3 L1Sim()** [3/3]

```
LinkPred::L1Sim::L1Sim (  
    L1Sim && that ) [default]
```

Move constructor.

## Parameters

|             |                     |
|-------------|---------------------|
| <i>that</i> | The object to move. |
|-------------|---------------------|

**9.52.2.4 ~L1Sim()**

```
virtual LinkPred::L1Sim::~~L1Sim ( ) [virtual], [default]
```

Destructor.

**9.52.3 Member Function Documentation****9.52.3.1 operator=()** [1/2]

```
L1Sim& LinkPred::L1Sim::operator= (  
    L1Sim && that ) [default]
```

Move assignment operator.

## Parameters

|             |                     |
|-------------|---------------------|
| <i>that</i> | The object to move. |
|-------------|---------------------|

**9.52.3.2 operator=()** [2/2]

```
L1Sim& LinkPred::L1Sim::operator= (  
    L1Sim const & that ) [default]
```

Copy assignment operator.

#### Parameters

|             |                     |
|-------------|---------------------|
| <i>that</i> | The object to copy. |
|-------------|---------------------|

### 9.52.3.3 `sim()`

```
virtual double LinkPred::L1Sim::sim (
    Vec const & v1,
    Vec const & v2 ) [virtual]
```

Compute the similarity between two vectors.

#### Parameters

|           |                                                             |
|-----------|-------------------------------------------------------------|
| <i>v1</i> | First vector.                                               |
| <i>v2</i> | Second vector. Must be of the same dimension as <i>v1</i> . |

#### Returns

The similarity between *v1* and *v2*.

Implements [LinkPred::SimMeasure](#).

The documentation for this class was generated from the following file:

- [include/linkpred/ml/simmeasures/l1sim.hpp](#)

## 9.53 LinkPred::L2Sim Class Reference

L2 similarity (negative the Euclidean distance).

```
#include <l2sim.hpp>
```

Inheritance diagram for LinkPred::L2Sim:

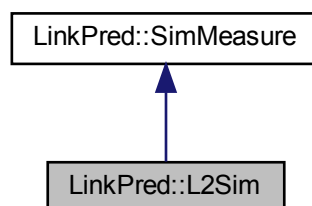

Collaboration diagram for LinkPred::L2Sim:

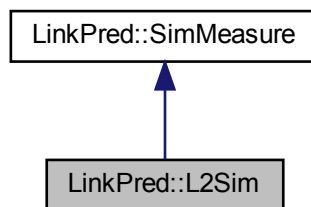

## Public Member Functions

- [L2Sim](#) ()
- [L2Sim](#) ([L2Sim](#) const &that)=default
- [L2Sim](#) & [operator=](#) ([L2Sim](#) const &that)=default
- [L2Sim](#) ([L2Sim](#) &&that)=default
- [L2Sim](#) & [operator=](#) ([L2Sim](#) &&that)=default
- virtual double [sim](#) ([Vec](#) const &v1, [Vec](#) const &v2)
- virtual [~L2Sim](#) ()=default

### 9.53.1 Detailed Description

L2 similarity (negative the Euclidean distance).

### 9.53.2 Constructor & Destructor Documentation

#### 9.53.2.1 L2Sim() [1/3]

```
LinkPred::L2Sim::L2Sim ( ) [inline]
```

Constructor.

#### 9.53.2.2 L2Sim() [2/3]

```
LinkPred::L2Sim::L2Sim (
    L2Sim const & that ) [default]
```

Copy constructor.

**Parameters**

|             |                     |
|-------------|---------------------|
| <i>that</i> | The object to copy. |
|-------------|---------------------|

**9.53.2.3 L2Sim()** [3/3]

```
LinkPred::L2Sim::L2Sim (  
    L2Sim && that ) [default]
```

Move constructor.

**Parameters**

|             |                     |
|-------------|---------------------|
| <i>that</i> | The object to move. |
|-------------|---------------------|

**9.53.2.4 ~L2Sim()**

```
virtual LinkPred::L2Sim::~~L2Sim ( ) [virtual], [default]
```

Destructor.

**9.53.3 Member Function Documentation****9.53.3.1 operator=()** [1/2]

```
L2Sim& LinkPred::L2Sim::operator= (  
    L2Sim && that ) [default]
```

Move assignment operator.

**Parameters**

|             |                     |
|-------------|---------------------|
| <i>that</i> | The object to move. |
|-------------|---------------------|

**9.53.3.2 operator=()** [2/2]

```
L2Sim& LinkPred::L2Sim::operator= (  
    L2Sim const & that ) [default]
```



Copy assignment operator.

#### Parameters

|             |                     |
|-------------|---------------------|
| <i>that</i> | The object to copy. |
|-------------|---------------------|

### 9.53.3.3 sim()

```
virtual double LinkPred::L2Sim::sim (
    Vec const & v1,
    Vec const & v2 ) [virtual]
```

Compute the similarity between two vectors.

#### Parameters

|           |                                                             |
|-----------|-------------------------------------------------------------|
| <i>v1</i> | First vector.                                               |
| <i>v2</i> | Second vector. Must be of the same dimension as <i>v1</i> . |

#### Returns

The similarity between *v1* and *v2*.

Implements [LinkPred::SimMeasure](#).

The documentation for this class was generated from the following file:

- [include/linkpred/ml/simmeasures/l2sim.hpp](#)

## 9.54 LinkPred::LargeVis< Network > Class Template Reference

[LargeVis](#) encoder. Reference: Tang, J., Liu, J., Zhang, M., and Mei, Q. (2016b). Visualizing large-scale and high-dimensional data. In Bourdeau, J., Hendler, J., Nkambou, R., Horrocks, I., and Zhao, B. Y., editors, WWW, pages 287–297. ACM. This implementation is based on the code <https://github.com/lferry007/LargeVis>.

```
#include <largevis.hpp>
```

Inheritance diagram for LinkPred::LargeVis< Network >:

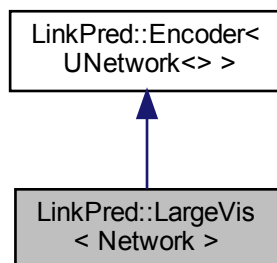

Collaboration diagram for LinkPred::LargeVis< Network >:

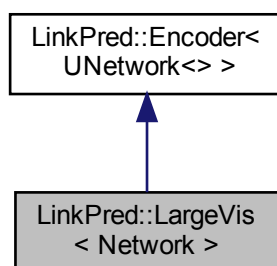

## Public Member Functions

- [LargeVis](#) (std::shared\_ptr< Network const > net, long int seed)
- [LargeVis](#) ([LargeVis](#) const &that)=default
- [LargeVis](#) & [operator=](#) ([LargeVis](#) const &that)=default
- [LargeVis](#) ([LargeVis](#) &&that)=default
- [LargeVis](#) & [operator=](#) ([LargeVis](#) &&that)=default
- virtual void [init](#) ()
- virtual void [encode](#) ()
- void [setNbSamples](#) ()
- float [getGamma](#) () const
- void [setGamma](#) (float gamma)
- float [getInitLR](#) () const
- void [setInitLR](#) (float initLR)
- long long [getNbNegSamples](#) () const
- void [setNbNegSamples](#) (long long nbNegSamples)
- long long [getNbSamples](#) () const

- void [setNbSamples](#) (long long nbSamples)
- long long [getNegSize](#) () const
- void [setNegSize](#) (long long negSize)
- float [getNegSamplingPower](#) () const
- void [setNegSamplingPower](#) (float negSamplingPower)
- const int [getDefaultDim](#) () const
- virtual [~LargeVis](#) ()=default

## Additional Inherited Members

### 9.54.1 Detailed Description

```
template<typename Network = UNetwork<>>
class LinkPred::LargeVis< Network >
```

[LargeVis](#) encoder. Reference: Tang, J., Liu, J., Zhang, M., and Mei, Q. (2016b). Visualizing large-scale and high-dimensional data. In Bourdeau, J., Hendler, J., Nkambou, R., Horrocks, I., and Zhao, B. Y., editors, WWW, pages 287–297. ACM. This implementation is based on the code <https://github.com/lferry007/LargeVis>.

#### Template Parameters

|                |                   |
|----------------|-------------------|
| <i>Network</i> | The network type. |
|----------------|-------------------|

### 9.54.2 Constructor & Destructor Documentation

#### 9.54.2.1 LargeVis() [1/3]

```
template<typename Network = UNetwork<>>
LinkPred::LargeVis< Network >::LargeVis (
    std::shared_ptr< Network const > net,
    long int seed ) [inline]
```

Constructor.

#### Parameters

|             |                               |
|-------------|-------------------------------|
| <i>net</i>  | The network.                  |
| <i>seed</i> | Random number generator seed. |

#### 9.54.2.2 LargeVis() [2/3]

```
template<typename Network = UNetwork<>>
```

```
LinkPred::LargeVis< Network >::LargeVis (
    LargeVis< Network > const & that ) [default]
```

Copy constructor.

#### Parameters

|             |                     |
|-------------|---------------------|
| <i>that</i> | The object to copy. |
|-------------|---------------------|

### 9.54.2.3 LargeVis() [3/3]

```
template<typename Network = UNetwork<>>
LinkPred::LargeVis< Network >::LargeVis (
    LargeVis< Network > && that ) [default]
```

Move constructor.

#### Parameters

|             |                     |
|-------------|---------------------|
| <i>that</i> | The object to move. |
|-------------|---------------------|

### 9.54.2.4 ~LargeVis()

```
template<typename Network = UNetwork<>>
virtual LinkPred::LargeVis< Network >::~~LargeVis ( ) [virtual], [default]
```

Destructor.

## 9.54.3 Member Function Documentation

### 9.54.3.1 encode()

```
template<typename Network = UNetwork<>>
virtual void LinkPred::LargeVis< Network >::encode ( ) [virtual]
```

Encode the network.

Implements [LinkPred::Encoder< UNetwork<>>](#).

### 9.54.3.2 getDefaultDim()

```
template<typename Network = UNetwork<>>
const int LinkPred::LargeVis< Network >::getDefaultDim ( ) const [inline]
```

#### Returns

The default embedding dimension.

### 9.54.3.3 getGamma()

```
template<typename Network = UNetwork<>>
float LinkPred::LargeVis< Network >::getGamma ( ) const [inline]
```

#### Returns

The parameter gamma.

### 9.54.3.4 getInitLR()

```
template<typename Network = UNetwork<>>
float LinkPred::LargeVis< Network >::getInitLR ( ) const [inline]
```

#### Returns

Initial learning rate.

### 9.54.3.5 getNbNegSamples()

```
template<typename Network = UNetwork<>>
long long LinkPred::LargeVis< Network >::getNbNegSamples ( ) const [inline]
```

#### Returns

Number of negative samples.

### 9.54.3.6 getNbSamples()

```
template<typename Network = UNetwork<>>
long long LinkPred::LargeVis< Network >::getNbSamples ( ) const [inline]
```

#### Returns

Number of samples.

### 9.54.3.7 getNegSamplingPower()

```
template<typename Network = UNetwork<>>
float LinkPred::LargeVis< Network >::getNegSamplingPower ( ) const [inline]
```

## Parameters

|              |                            |
|--------------|----------------------------|
| <i>Power</i> | used in negative sampling. |
|--------------|----------------------------|

**9.54.3.8 getNegSize()**

```
template<typename Network = UNetwork<>>
long long LinkPred::LargeVis< Network >::getNegSize ( ) const [inline]
```

## Returns

The size of the table used in negative sampling.

**9.54.3.9 init()**

```
template<typename Network = UNetwork<>>
virtual void LinkPred::LargeVis< Network >::init ( ) [virtual]
```

Initialize encoder.

Implements [LinkPred::Encoder< UNetwork<> >](#).

**9.54.3.10 operator=() [1/2]**

```
template<typename Network = UNetwork<>>
LargeVis& LinkPred::LargeVis< Network >::operator= (
    LargeVis< Network > && that ) [default]
```

Move assignment operator.

## Parameters

|             |                     |
|-------------|---------------------|
| <i>that</i> | The object to move. |
|-------------|---------------------|

**9.54.3.11 operator=() [2/2]**

```
template<typename Network = UNetwork<>>
LargeVis& LinkPred::LargeVis< Network >::operator= (
    LargeVis< Network > const & that ) [default]
```

Copy assignment operator.

## Parameters

|             |                     |
|-------------|---------------------|
| <i>that</i> | The object to copy. |
|-------------|---------------------|

**9.54.3.12 setGamma()**

```
template<typename Network = UNetwork<>>
void LinkPred::LargeVis< Network >::setGamma (
    float gamma ) [inline]
```

Set the parameter gamma.

## Parameters

|              |                      |
|--------------|----------------------|
| <i>gamma</i> | The parameter gamma. |
|--------------|----------------------|

**9.54.3.13 setInitLR()**

```
template<typename Network = UNetwork<>>
void LinkPred::LargeVis< Network >::setInitLR (
    float initLR ) [inline]
```

Set the initial learning rate.

## Parameters

|               |                            |
|---------------|----------------------------|
| <i>initLR</i> | The initial learning rate. |
|---------------|----------------------------|

**9.54.3.14 setNbNegSamples()**

```
template<typename Network = UNetwork<>>
void LinkPred::LargeVis< Network >::setNbNegSamples (
    long long nbNegSamples ) [inline]
```

Set the number of negative samples.

## Parameters

|                     |                                 |
|---------------------|---------------------------------|
| <i>nbNegSamples</i> | The number of negative samples. |
|---------------------|---------------------------------|



**9.54.3.15 setNbSamples()** [1/2]

```
template<typename Network = UNetwork<>>
void LinkPred::LargeVis< Network >::setNbSamples ( )
```

Set nbSamples using a simple rule of thumb.

**9.54.3.16 setNbSamples()** [2/2]

```
template<typename Network = UNetwork<>>
void LinkPred::LargeVis< Network >::setNbSamples (
    long long nbSamples ) [inline]
```

Set the number of samples.

**Parameters**

|                  |                        |
|------------------|------------------------|
| <i>nbSamples</i> | The number of samples. |
|------------------|------------------------|

**9.54.3.17 setNegSamplingPower()**

```
template<typename Network = UNetwork<>>
void LinkPred::LargeVis< Network >::setNegSamplingPower (
    float negSamplingPower ) [inline]
```

Set the power used in negative sampling.

**Parameters**

|                         |                                  |
|-------------------------|----------------------------------|
| <i>negSamplingPower</i> | Power used in negative sampling. |
|-------------------------|----------------------------------|

**9.54.3.18 setNegSize()**

```
template<typename Network = UNetwork<>>
void LinkPred::LargeVis< Network >::setNegSize (
    long long negSize ) [inline]
```

Set the size of the table used in negative sampling.

**Parameters**

|                |                                              |
|----------------|----------------------------------------------|
| <i>negSize</i> | Size of the table used in negative sampling. |
|----------------|----------------------------------------------|

The documentation for this class was generated from the following file:

- [include/linkpred/graphalg/encoders/largevis/largevis.hpp](#)

## 9.55 LinkPred::Simp::Evaluator::Factory::LCPParams Struct Reference

Parameters of LCP.

```
#include <evaluator.hpp>
```

### Public Attributes

- double [epsilon](#) = 0.001

### 9.55.1 Detailed Description

Parameters of LCP.

### 9.55.2 Member Data Documentation

#### 9.55.2.1 epsilon

```
double LinkPred::Simp::Evaluator::Factory::LCPParams::epsilon = 0.001
```

The weight of paths of length 3 in LCP.

The documentation for this struct was generated from the following file:

- [include/linkpred/simp/evaluator.hpp](#)

## 9.56 LinkPred::LINE< Network > Class Template Reference

LINE encoder.

```
#include <line.hpp>
```

Inheritance diagram for LinkPred::LINE< Network >:

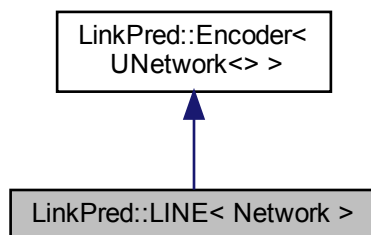

Collaboration diagram for LinkPred::LINE< Network >:

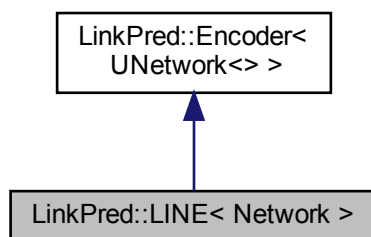

### Public Member Functions

- [LINE](#) (std::shared\_ptr< Network const > net, long int seed)
- [LINE](#) (LINE const &that)=default
- [LINE](#) & operator= (LINE const &that)=default
- [LINE](#) (LINE &&that)=default
- [LINE](#) & operator= (LINE &&that)=default
- virtual void [init](#) ()
- virtual void [encode](#) ()
- float [getInitLr](#) () const
- void [setInitLr](#) (float initLR)
- int [getNbNegSamples](#) () const
- void [setNbNegSamples](#) (int nbNegSamples)

- int `getOrder` () const
- void `setOrder` (int order)
- float `getNegSamplingPower` () const
- void `setNegSamplingPower` (float negSamplingPower)
- long long `getNegSize` () const
- void `setNegSize` (long long negSize)
- bool `isEnableReconstruct` () const
- void `setEnableReconstruct` (bool enableReconstruct)
- const std::shared\_ptr< const Network > `getRecNet` () const
- const `WeightMapSP` & `getRecWeightMap` () const
- const int `getDefaultDim` () const
- virtual `~LINE` ()=default

## Additional Inherited Members

### 9.56.1 Detailed Description

```
template<typename Network = UNetwork<>>
class LinkPred::LINE< Network >
```

`LINE` encoder.

This implementation is based on the code <https://github.com/tangjianpku/LINE> Reference: Tang, J., Qu, M., Wang, M., Zhang, M., Yan, J., and Mei, Q. (2015). `LINE`: Large-Scale Information Network Embedding, page 1067–1077. International World Wide Web Conferences Steering Committee, Republic and Canton of Geneva, CHE.

#### Template Parameters

|                |                   |
|----------------|-------------------|
| <i>Network</i> | The network type. |
|----------------|-------------------|

### 9.56.2 Constructor & Destructor Documentation

#### 9.56.2.1 `LINE()` [1/3]

```
template<typename Network = UNetwork<>>
LinkPred::LINE< Network >::LINE (
    std::shared_ptr< Network const > net,
    long int seed ) [inline]
```

Constructor.

#### Parameters

|             |                               |
|-------------|-------------------------------|
| <i>net</i>  | The network.                  |
| <i>seed</i> | Random number generator seed. |

### 9.56.2.2 LINE() [2/3]

```
template<typename Network = UNetwork<>>
LinkPred::LINE< Network >::LINE (
    LINE< Network > const & that ) [default]
```

Copy constructor.

#### Parameters

|             |                     |
|-------------|---------------------|
| <i>that</i> | The object to copy. |
|-------------|---------------------|

### 9.56.2.3 LINE() [3/3]

```
template<typename Network = UNetwork<>>
LinkPred::LINE< Network >::LINE (
    LINE< Network > && that ) [default]
```

Move constructor.

#### Parameters

|             |                     |
|-------------|---------------------|
| <i>that</i> | The object to move. |
|-------------|---------------------|

### 9.56.2.4 ~LINE()

```
template<typename Network = UNetwork<>>
virtual LinkPred::LINE< Network >::~~LINE ( ) [virtual], [default]
```

Destructor.

## 9.56.3 Member Function Documentation

### 9.56.3.1 encode()

```
template<typename Network = UNetwork<>>
virtual void LinkPred::LINE< Network >::encode ( ) [virtual]
```

Encode the network.

Implements [LinkPred::Encoder< UNetwork<>>](#) .

### 9.56.3.2 getDefaultDim()

```
template<typename Network = UNetwork<>>
const int LinkPred::LINE< Network >::getDefaultDim ( ) const [inline]
```

#### Returns

The default embedding dimension.

### 9.56.3.3 getInitLr()

```
template<typename Network = UNetwork<>>
float LinkPred::LINE< Network >::getInitLr ( ) const [inline]
```

#### Returns

Initial learning rate.

### 9.56.3.4 getNbNegSamples()

```
template<typename Network = UNetwork<>>
int LinkPred::LINE< Network >::getNbNegSamples ( ) const [inline]
```

#### Returns

Number of negative samples.

### 9.56.3.5 getNegSamplingPower()

```
template<typename Network = UNetwork<>>
float LinkPred::LINE< Network >::getNegSamplingPower ( ) const [inline]
```

#### Parameters

|              |                            |
|--------------|----------------------------|
| <i>Power</i> | used in negative sampling. |
|--------------|----------------------------|

### 9.56.3.6 getNegSize()

```
template<typename Network = UNetwork<>>
long long LinkPred::LINE< Network >::getNegSize ( ) const [inline]
```

**Returns**

The size of the table used in negative sampling.

**9.56.3.7 getOrder()**

```
template<typename Network = UNetwork<>>
int LinkPred::LINE< Network >::getOrder ( ) const [inline]
```

**Returns**

The order of similarity. Possible values are: 1 (first order), 2 (second order), and 12 (concatenate first and second order). When order = 12, the embedding dimension is split between first order codes and second order codes.

**9.56.3.8 getRecNet()**

```
template<typename Network = UNetwork<>>
const std::shared_ptr<const Network> LinkPred::LINE< Network >::getRecNet ( ) const [inline]
```

**Returns**

The reconstructed network.

**9.56.3.9 getRecWeightMap()**

```
template<typename Network = UNetwork<>>
const WeightMapSP& LinkPred::LINE< Network >::getRecWeightMap ( ) const [inline]
```

**Returns**

The weight map of the reconstructed network.

**9.56.3.10 init()**

```
template<typename Network = UNetwork<>>
virtual void LinkPred::LINE< Network >::init ( ) [virtual]
```

Initialize encoder.

Implements [LinkPred::Encoder< UNetwork<> >](#).

### 9.56.3.11 isEnabledReconstruct()

```
template<typename Network = UNetwork<>>
bool LinkPred::LINE< Network >::isEnabledReconstruct ( ) const [inline]
```

#### Returns

Whether the network is reconstructed (expanded).

### 9.56.3.12 operator=() [1/2]

```
template<typename Network = UNetwork<>>
LINE& LinkPred::LINE< Network >::operator= (
    LINE< Network > && that ) [default]
```

Move assignment operator.

#### Parameters

|             |                     |
|-------------|---------------------|
| <i>that</i> | The object to move. |
|-------------|---------------------|

### 9.56.3.13 operator=() [2/2]

```
template<typename Network = UNetwork<>>
LINE& LinkPred::LINE< Network >::operator= (
    LINE< Network > const & that ) [default]
```

Copy assignment operator.

#### Parameters

|             |                     |
|-------------|---------------------|
| <i>that</i> | The object to copy. |
|-------------|---------------------|

### 9.56.3.14 setEnableReconstruct()

```
template<typename Network = UNetwork<>>
void LinkPred::LINE< Network >::setEnableReconstruct (
    bool enableReconstruct ) [inline]
```

Set whether the network is reconstructed (expanded).



## Parameters

|                          |                                                  |
|--------------------------|--------------------------------------------------|
| <i>enableReconstruct</i> | Whether the network is reconstructed (expanded). |
|--------------------------|--------------------------------------------------|

**9.56.3.15 setInitLr()**

```
template<typename Network = UNetwork<>>
void LinkPred::LINE< Network >::setInitLr (
    float initLR ) [inline]
```

Set the initial learning rate.

## Parameters

|               |                            |
|---------------|----------------------------|
| <i>initLR</i> | The initial learning rate. |
|---------------|----------------------------|

**9.56.3.16 setNbNegSamples()**

```
template<typename Network = UNetwork<>>
void LinkPred::LINE< Network >::setNbNegSamples (
    int nbNegSamples ) [inline]
```

Set the number of negative samples.

## Parameters

|                     |                                 |
|---------------------|---------------------------------|
| <i>nbNegSamples</i> | The number of negative samples. |
|---------------------|---------------------------------|

**9.56.3.17 setNegSamplingPower()**

```
template<typename Network = UNetwork<>>
void LinkPred::LINE< Network >::setNegSamplingPower (
    float negSamplingPower ) [inline]
```

Set the power used in negative sampling.

## Parameters

|                         |                                  |
|-------------------------|----------------------------------|
| <i>negSamplingPower</i> | Power used in negative sampling. |
|-------------------------|----------------------------------|

### 9.56.3.18 setNegSize()

```
template<typename Network = UNetwork<>>
void LinkPred::LINE< Network >::setNegSize (
    long long negSize ) [inline]
```

Set the size of the table used in negative sampling.

#### Parameters

|                |                                              |
|----------------|----------------------------------------------|
| <i>negSize</i> | Size of the table used in negative sampling. |
|----------------|----------------------------------------------|

### 9.56.3.19 setOrder()

```
template<typename Network = UNetwork<>>
void LinkPred::LINE< Network >::setOrder (
    int order ) [inline]
```

Set the order of similarity. Possible values are: 1 (first order), 2 (second order), and 12 (concatenate first and second order). When order = 12, the embedding dimension is split between first order codes and second order codes.

#### Parameters

|              |                      |
|--------------|----------------------|
| <i>order</i> | Order of similarity. |
|--------------|----------------------|

The documentation for this class was generated from the following file:

- [include/linkpred/graphalg/encoders/line/line.hpp](#)

## 9.57 LinkPred::LMapQueue< K, P, KComparator, PComparator > Class Template Reference

A map-priority queue with limit on the capacity.

```
#include <lmapqueue.hpp>
```

### Public Member Functions

- [LMapQueue](#) (std::size\_t l)
- [LMapQueue](#) ([LMapQueue](#) const &that)=default
- [LMapQueue](#) & operator= ([LMapQueue](#) const &that)=default
- [LMapQueue](#) ([LMapQueue](#) &&that)=default
- [LMapQueue](#) & operator= ([LMapQueue](#) &&that)=default
- const std::pair< K, P > & [top](#) () const
- bool [empty](#) () const

- `std::size_t size () const`
- `void printPQ ()`
- `bool push (std::pair< K, P > const &elem)`
- `bool push (K const &key, P const &pr)`
- `bool compareTop (P const &pr)`
- `P & at (K const &key)`
- `const P & at (K const &key) const`
- `void pop ()`
- `void pop (P const pr)`
- `auto begin ()`
- `auto begin () const`
- `auto cbegin () const`
- `auto end ()`
- `auto end () const`
- `auto cend () const`
- `std::size_t getL () const`
- `void clear ()`
- `std::size_t count (K const &key) const`
- `auto find (K const &key) const`
- `virtual ~LMapQueue ()=default`

## Static Public Member Functions

- `template<typename RandomIterator >`  
`static LMapQueue< K, P, KComparator, PComparator > merge (std::size_t k, RandomIterator begin,`  
`RandomIterator end)`

### 9.57.1 Detailed Description

```
template<typename K, typename P, typename KComparator = std::less<K>, typename PComparator = std::greater<P>>
class LinkPred::LMapQueue< K, P, KComparator, PComparator >
```

A map-priority queue with limit on the capacity.

#### Template Parameters

|                    |                      |
|--------------------|----------------------|
| <i>K</i>           | The key type.        |
| <i>P</i>           | The priority type.   |
| <i>KComparator</i> | Key comparator.      |
| <i>PComparator</i> | Priority comparator. |

### 9.57.2 Constructor & Destructor Documentation

#### 9.57.2.1 LMapQueue() [1/3]

```
template<typename K , typename P , typename KComparator = std::less<K>, typename PComparator
= std::greater<P>>
```

```
LinkPred::LMapQueue< K, P, KComparator, PComparator >::LMapQueue (
    std::size_t l ) [inline]
```

Constructor.

Parameters

|   |                                      |
|---|--------------------------------------|
| / | The capacity limit of the container. |
|---|--------------------------------------|

### 9.57.2.2 LMapQueue() [2/3]

```
template<typename K , typename P , typename KComparator = std::less<K>, typename PComparator
= std::greater<P>>
LinkPred::LMapQueue< K, P, KComparator, PComparator >::LMapQueue (
    LMapQueue< K, P, KComparator, PComparator > const & that ) [default]
```

Copy constructor.

Parameters

|             |                     |
|-------------|---------------------|
| <i>that</i> | The object to copy. |
|-------------|---------------------|

### 9.57.2.3 LMapQueue() [3/3]

```
template<typename K , typename P , typename KComparator = std::less<K>, typename PComparator
= std::greater<P>>
LinkPred::LMapQueue< K, P, KComparator, PComparator >::LMapQueue (
    LMapQueue< K, P, KComparator, PComparator > && that ) [default]
```

Move constructor.

Parameters

|             |                     |
|-------------|---------------------|
| <i>that</i> | The object to move. |
|-------------|---------------------|

### 9.57.2.4 ~LMapQueue()

```
template<typename K , typename P , typename KComparator = std::less<K>, typename PComparator
= std::greater<P>>
virtual LinkPred::LMapQueue< K, P, KComparator, PComparator >::~~LMapQueue ( ) [virtual],
[default]
```

Destructor.

### 9.57.3 Member Function Documentation

#### 9.57.3.1 at() [1/2]

```
template<typename K , typename P , typename KComparator = std::less<K>, typename PComparator
= std::greater<P>>
P& LinkPred::LMapQueue< K, P, KComparator, PComparator >::at (
    K const & key ) [inline]
```

Returns a reference to the priority of the element with key equivalent to key. If no such element exists, an exception of type `std::out_of_range` is thrown.

##### Parameters

|            |                                 |
|------------|---------------------------------|
| <i>key</i> | The key of the element to find. |
|------------|---------------------------------|

##### Returns

Reference to the priority of the requested element

#### 9.57.3.2 at() [2/2]

```
template<typename K , typename P , typename KComparator = std::less<K>, typename PComparator
= std::greater<P>>
const P& LinkPred::LMapQueue< K, P, KComparator, PComparator >::at (
    K const & key ) const [inline]
```

Returns a reference to the priority of the element with key equivalent to key. If no such element exists, an exception of type `std::out_of_range` is thrown.

##### Parameters

|            |                                 |
|------------|---------------------------------|
| <i>key</i> | The key of the element to find. |
|------------|---------------------------------|

##### Returns

Reference to the priority of the requested element

#### 9.57.3.3 begin() [1/2]

```
template<typename K , typename P , typename KComparator = std::less<K>, typename PComparator
= std::greater<P>>
auto LinkPred::LMapQueue< K, P, KComparator, PComparator >::begin ( ) [inline]
```

**Returns**

An iterator to the first element in the map.

**9.57.3.4 begin() [2/2]**

```
template<typename K , typename P , typename KComparator = std::less<K>, typename PComparator
= std::greater<P>>
auto LinkPred::LMapQueue< K, P, KComparator, PComparator >::begin ( ) const [inline]
```

**Returns**

A constant iterator to the first element in the map.

**9.57.3.5 cbegin()**

```
template<typename K , typename P , typename KComparator = std::less<K>, typename PComparator
= std::greater<P>>
auto LinkPred::LMapQueue< K, P, KComparator, PComparator >::cbegin ( ) const [inline]
```

**Returns**

A constant iterator to the first element in the map.

**9.57.3.6 cend()**

```
template<typename K , typename P , typename KComparator = std::less<K>, typename PComparator
= std::greater<P>>
auto LinkPred::LMapQueue< K, P, KComparator, PComparator >::cend ( ) const [inline]
```

**Returns**

A constant iterator to the one-past-the-last element in the map.

**9.57.3.7 clear()**

```
template<typename K , typename P , typename KComparator = std::less<K>, typename PComparator
= std::greater<P>>
void LinkPred::LMapQueue< K, P, KComparator, PComparator >::clear ( ) [inline]
```

Clear the content of the container.

**9.57.3.8 compareTop()**

```
template<typename K , typename P , typename KComparator = std::less<K>, typename PComparator
= std::greater<P>>
bool LinkPred::LMapQueue< K, P, KComparator, PComparator >::compareTop (
    P const & pr ) [inline]
```

Compares the input priority to the priority of the top element in the queue. The queue must not be empty. A true return value means that an element with priority pr will be inserted to the queue.

## Parameters

|           |                              |
|-----------|------------------------------|
| <i>pr</i> | The priority to be compared. |
|-----------|------------------------------|

## Returns

True result of comparing the priority of top to pr.

## 9.57.3.9 count()

```
template<typename K , typename P , typename KComparator = std::less<K>, typename PComparator
= std::greater<P>>
std::size_t LinkPred::LMapQueue< K, P, KComparator, PComparator >::count (
    K const & key ) const [inline]
```

## Parameters

|            |                                     |
|------------|-------------------------------------|
| <i>key</i> | key value of the elements to count. |
|------------|-------------------------------------|

## Returns

Number of elements with key that compares equivalent to key, which is either 1 or 0.

## 9.57.3.10 empty()

```
template<typename K , typename P , typename KComparator = std::less<K>, typename PComparator
= std::greater<P>>
bool LinkPred::LMapQueue< K, P, KComparator, PComparator >::empty ( ) const [inline]
```

Checks whether the container is empty.

## Returns

True if the container is empty, false otherwise.

## 9.57.3.11 end() [1/2]

```
template<typename K , typename P , typename KComparator = std::less<K>, typename PComparator
= std::greater<P>>
auto LinkPred::LMapQueue< K, P, KComparator, PComparator >::end ( ) [inline]
```

## Returns

An iterator to the one-past-the-last element in the map.

**9.57.3.12 end()** [2/2]

```
template<typename K , typename P , typename KComparator = std::less<K>, typename PComparator
= std::greater<P>>
auto LinkPred::LMapQueue< K, P, KComparator, PComparator >::end ( ) const [inline]
```

**Returns**

A constant iterator to the one-past-the-last element in the map.

**9.57.3.13 find()**

```
template<typename K , typename P , typename KComparator = std::less<K>, typename PComparator
= std::greater<P>>
auto LinkPred::LMapQueue< K, P, KComparator, PComparator >::find (
    K const & key ) const [inline]
```

**Parameters**

|            |                                     |
|------------|-------------------------------------|
| <i>key</i> | value of the element to search for. |
|------------|-------------------------------------|

**Returns**

Iterator to an element with key equivalent to key. If no such element is found, past-the-end (see [end\(\)](#)) iterator is returned.

**9.57.3.14 getL()**

```
template<typename K , typename P , typename KComparator = std::less<K>, typename PComparator
= std::greater<P>>
std::size_t LinkPred::LMapQueue< K, P, KComparator, PComparator >::getL ( ) const [inline]
```

**Returns**

The value of the limiting capacity.

**9.57.3.15 merge()**

```
template<typename K , typename P , typename KComparator = std::less<K>, typename PComparator
= std::greater<P>>
template<typename RandomIterator >
static LMapQueue<K, P, KComparator, PComparator> LinkPred::LMapQueue< K, P, KComparator, P↔
Comparator >::merge (
    std::size_t k,
    RandomIterator begin,
    RandomIterator end ) [inline], [static]
```

Merge several queues by selecting at most the top k elements. The elements selected are unique. In case of duplication, the highest priority is considered. The input queues are emptied.



**9.57.3.16 operator=()** [1/2]

```
template<typename K , typename P , typename KComparator = std::less<K>, typename PComparator
= std::greater<P>>
LMapQueue& LinkPred::LMapQueue< K, P, KComparator, PComparator >::operator= (
    LMapQueue< K, P, KComparator, PComparator > && that ) [default]
```

Move assignment operator.

**Parameters**

|             |                     |
|-------------|---------------------|
| <i>that</i> | The object to move. |
|-------------|---------------------|

**9.57.3.17 operator=()** [2/2]

```
template<typename K , typename P , typename KComparator = std::less<K>, typename PComparator
= std::greater<P>>
LMapQueue& LinkPred::LMapQueue< K, P, KComparator, PComparator >::operator= (
    LMapQueue< K, P, KComparator, PComparator > const & that ) [default]
```

Copy assignment operator.

**Parameters**

|             |                     |
|-------------|---------------------|
| <i>that</i> | The object to copy. |
|-------------|---------------------|

**9.57.3.18 pop()** [1/2]

```
template<typename K , typename P , typename KComparator = std::less<K>, typename PComparator
= std::greater<P>>
void LinkPred::LMapQueue< K, P, KComparator, PComparator >::pop ( ) [inline]
```

Removes the top element from the priority queue.

**9.57.3.19 pop()** [2/2]

```
template<typename K , typename P , typename KComparator = std::less<K>, typename PComparator
= std::greater<P>>
void LinkPred::LMapQueue< K, P, KComparator, PComparator >::pop (
    P const pr ) [inline]
```

Removes all element with priority strictly less than the specified value.

## Parameters

|           |                         |
|-----------|-------------------------|
| <i>pr</i> | The threshold priority. |
|-----------|-------------------------|

**9.57.3.20 printPQ()**

```
template<typename K , typename P , typename KComparator = std::less<K>, typename PComparator
= std::greater<P>>
void LinkPred::LMapQueue< K, P, KComparator, PComparator >::printPQ ( ) [inline]
```

Print the content of the queue.

**9.57.3.21 push() [1/2]**

```
template<typename K , typename P , typename KComparator = std::less<K>, typename PComparator
= std::greater<P>>
bool LinkPred::LMapQueue< K, P, KComparator, PComparator >::push (
    K const & key,
    P const & pr ) [inline]
```

Insert an element into the map. Only the top *l* elements are kept.

## Parameters

|            |                                    |
|------------|------------------------------------|
| <i>key</i> | The key of the element top insert. |
| <i>pr</i>  | The priority of the element.       |

## Returns

True if the insertion takes place, false otherwise.

**9.57.3.22 push() [2/2]**

```
template<typename K , typename P , typename KComparator = std::less<K>, typename PComparator
= std::greater<P>>
bool LinkPred::LMapQueue< K, P, KComparator, PComparator >::push (
    std::pair< K, P > const & elem ) [inline]
```

Insert an element into the map. Only the top *l* elements are kept.

## Parameters

|             |                                                                                                                             |
|-------------|-----------------------------------------------------------------------------------------------------------------------------|
| <i>elem</i> | A pair where the first element is the key of the element top insert, and the second element is the priority of the element. |
|-------------|-----------------------------------------------------------------------------------------------------------------------------|

**Returns**

True if the insertion takes place, false otherwise.

**9.57.3.23 size()**

```
template<typename K , typename P , typename KComparator = std::less<K>, typename PComparator
= std::greater<P>>
std::size_t LinkPred::LMapQueue< K, P, KComparator, PComparator >::size ( ) const [inline]
```

**Returns**

The number of elements in the container.

**9.57.3.24 top()**

```
template<typename K , typename P , typename KComparator = std::less<K>, typename PComparator
= std::greater<P>>
const std::pair<K, P>& LinkPred::LMapQueue< K, P, KComparator, PComparator >::top ( ) const
[inline]
```

**Returns**

A reference to the element with the highest priority.

The documentation for this class was generated from the following file:

- [include/linkpred/core/ds/lmapqueue.hpp](#)

## 9.58 LinkPred::Log Class Reference

A log class.

```
#include <log.hpp>
```

**Public Member Functions**

- [Log](#) (LogLevel level=logError)
- [template<typename T > Log & operator<< \(T const &value\)](#)
- [~Log](#) ()

## Static Public Attributes

- static constexpr std::ostream \* [DefaultOutputStream](#) = &std::cerr
- static const [LogLevel](#) [DefaultLogLevel](#) = [logError](#)
- static std::ostream \* [out](#)
- static [LogLevel](#) [logLevel](#)

### 9.58.1 Detailed Description

A log class.

### 9.58.2 Constructor & Destructor Documentation

#### 9.58.2.1 Log()

```
LinkPred::Log::Log (
    LogLevel level = logError ) [inline]
```

Constructor.

#### 9.58.2.2 ~Log()

```
LinkPred::Log::~~Log ( ) [inline]
```

Destructor.

### 9.58.3 Member Function Documentation

#### 9.58.3.1 operator<<()

```
template<typename T >
Log& LinkPred::Log::operator<< (
    T const & value ) [inline]
```

Copy constructor.

#### Parameters

|              |                     |
|--------------|---------------------|
| <i>value</i> | Value to be logged. |
|--------------|---------------------|

## 9.58.4 Member Data Documentation

### 9.58.4.1 DefaultLogLevel

```
const LogLevel LinkPred::Log::DefaultLogLevel = logError [static]
```

Default log level.

### 9.58.4.2 DefaultOutputStream

```
constexpr std::ostream* LinkPred::Log::DefaultOutputStream = &std::cerr [static], [constexpr]
```

Default output stream.

### 9.58.4.3 logLevel

```
LogLevel LinkPred::Log::logLevel [static]
```

Log level.

### 9.58.4.4 out

```
std::ostream* LinkPred::Log::out [static]
```

Output file.

The documentation for this class was generated from the following file:

- [include/linkpred/utls/log.hpp](#)

## 9.59 LinkPred::LogisticRegressor< InRndIt, OutRndIt, ScoreRndIt > Class Template Reference

Logistic regression algorithm.

```
#include <logisticregressor.hpp>
```

Inheritance diagram for LinkPred::LogisticRegressor< InRndIt, OutRndIt, ScoreRndIt >:

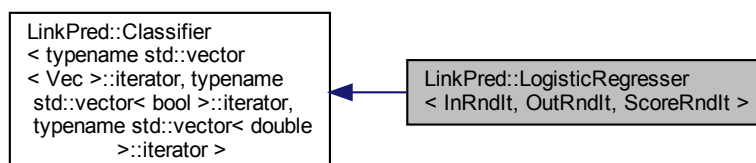

Collaboration diagram for LinkPred::LogisticRegressor< InRndIt, OutRndIt, ScoreRndIt >:

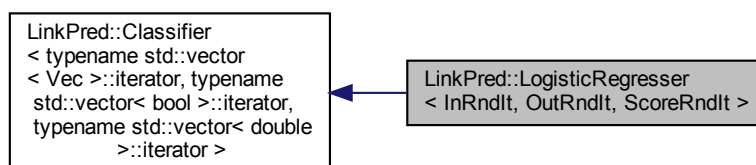

### Public Member Functions

- [LogisticRegressor](#) (double lambda, long int seed)
- [LogisticRegressor](#) ([LogisticRegressor](#) const &that)=default
- [LogisticRegressor](#) & [operator=](#) ([LogisticRegressor](#) const &that)=default
- [LogisticRegressor](#) ([LogisticRegressor](#) &&that)=default
- [LogisticRegressor](#) & [operator=](#) ([LogisticRegressor](#) &&that)=default
- virtual void [learn](#) (InRndIt trInBegin, InRndIt trInEnd, OutRndIt trOutBegin, OutRndIt trOutEnd)
- virtual void [predict](#) (InRndIt inBegin, InRndIt inEnd, ScoreRndIt scoresBegin)
- double [getLambda](#) () const
- void [setLambda](#) (double lambda)
- double [getTol](#) () const
- void [setTol](#) (double tol)
- const [Vec](#) & [getTheta](#) () const
- virtual [~LogisticRegressor](#) ()=default

### 9.59.1 Detailed Description

```
template<typename InRndIt = typename std::vector<Vec>::iterator, typename OutRndIt = typename std::vector<bool>::iterator, typename ScoreRndIt = typename std::vector<double>::iterator>
class LinkPred::LogisticRegressor< InRndIt, OutRndIt, ScoreRndIt >
```

Logistic regression algorithm.

#### Template Parameters

|                              |                                      |
|------------------------------|--------------------------------------|
| <i>InRndIt</i>               | Input (features) iterator type.      |
| <i>OutRndIt</i>              | Output (class) iterator type.        |
| <i>Score</i><br><i>RndIt</i> | Classification scores iterator type. |

### 9.59.2 Constructor & Destructor Documentation

#### 9.59.2.1 LogisticRegressor() [1/3]

```
template<typename InRndIt = typename std::vector<Vec>::iterator, typename OutRndIt = typename
std::vector<bool>::iterator, typename ScoreRndIt = typename std::vector<double>::iterator>
LinkPred::LogisticRegressor< InRndIt, OutRndIt, ScoreRndIt >::LogisticRegressor (
    double lambda,
    long int seed ) [inline]
```

Constructor.

#### Parameters

|               |                                     |
|---------------|-------------------------------------|
| <i>lambda</i> | Regularization coefficient.         |
| <i>seed</i>   | The random number generator's seed. |

#### 9.59.2.2 LogisticRegressor() [2/3]

```
template<typename InRndIt = typename std::vector<Vec>::iterator, typename OutRndIt = typename
std::vector<bool>::iterator, typename ScoreRndIt = typename std::vector<double>::iterator>
LinkPred::LogisticRegressor< InRndIt, OutRndIt, ScoreRndIt >::LogisticRegressor (
    LogisticRegressor< InRndIt, OutRndIt, ScoreRndIt > const & that ) [default]
```

Copy constructor.

#### Parameters

|             |                     |
|-------------|---------------------|
| <i>that</i> | The object to copy. |
|-------------|---------------------|

### 9.59.2.3 LogisticRegressor() [3/3]

```
template<typename InRndIt = typename std::vector<Vec>::iterator, typename OutRndIt = typename
std::vector<bool>::iterator, typename ScoreRndIt = typename std::vector<double>::iterator>
LinkPred::LogisticRegressor< InRndIt, OutRndIt, ScoreRndIt >::LogisticRegressor (
    LogisticRegressor< InRndIt, OutRndIt, ScoreRndIt > && that ) [default]
```

Move constructor.

#### Parameters

|             |                     |
|-------------|---------------------|
| <i>that</i> | The object to move. |
|-------------|---------------------|

### 9.59.2.4 ~LogisticRegressor()

```
template<typename InRndIt = typename std::vector<Vec>::iterator, typename OutRndIt = typename
std::vector<bool>::iterator, typename ScoreRndIt = typename std::vector<double>::iterator>
virtual LinkPred::LogisticRegressor< InRndIt, OutRndIt, ScoreRndIt >::~~LogisticRegressor ( )
[virtual], [default]
```

Destructor.

## 9.59.3 Member Function Documentation

### 9.59.3.1 getLambda()

```
template<typename InRndIt = typename std::vector<Vec>::iterator, typename OutRndIt = typename
std::vector<bool>::iterator, typename ScoreRndIt = typename std::vector<double>::iterator>
double LinkPred::LogisticRegressor< InRndIt, OutRndIt, ScoreRndIt >::getLambda ( ) const
[inline]
```

#### Returns

The regularization coefficient.



### 9.59.3.2 getTheta()

```
template<typename InRndIt = typename std::vector<Vec>::iterator, typename OutRndIt = typename
std::vector<bool>::iterator, typename ScoreRndIt = typename std::vector<double>::iterator>
const Vec& LinkPred::LogisticRegressor< InRndIt, OutRndIt, ScoreRndIt >::getTheta ( ) const
[inline]
```

#### Returns

The model parameters.

### 9.59.3.3 getTol()

```
template<typename InRndIt = typename std::vector<Vec>::iterator, typename OutRndIt = typename
std::vector<bool>::iterator, typename ScoreRndIt = typename std::vector<double>::iterator>
double LinkPred::LogisticRegressor< InRndIt, OutRndIt, ScoreRndIt >::getTol ( ) const [inline]
```

#### Returns

The tolerance.

### 9.59.3.4 learn()

```
template<typename InRndIt = typename std::vector<Vec>::iterator, typename OutRndIt = typename
std::vector<bool>::iterator, typename ScoreRndIt = typename std::vector<double>::iterator>
virtual void LinkPred::LogisticRegressor< InRndIt, OutRndIt, ScoreRndIt >::learn (
    InRndIt trInBegin,
    InRndIt trInEnd,
    OutRndIt trOutBegin,
    OutRndIt trOutEnd ) [virtual]
```

Learn from data.

#### Parameters

|                   |                                                         |
|-------------------|---------------------------------------------------------|
| <i>trInBegin</i>  | Iterator to the first example features (input).         |
| <i>trInEnd</i>    | Iterator to one-past-the-last example features (input). |
| <i>trOutBegin</i> | Iterator to the first example class (output).           |
| <i>trOutEnd</i>   | Iterator to one-past-the-last example class (output).   |

### 9.59.3.5 operator=() [1/2]

```
template<typename InRndIt = typename std::vector<Vec>::iterator, typename OutRndIt = typename
std::vector<bool>::iterator, typename ScoreRndIt = typename std::vector<double>::iterator>
```

```
LogisticRegressor& LinkPred::LogisticRegressor< InRndIt, OutRndIt, ScoreRndIt >::operator= (
    LogisticRegressor< InRndIt, OutRndIt, ScoreRndIt > && that ) [default]
```

Move assignment operator.

#### Parameters

|             |                     |
|-------------|---------------------|
| <i>that</i> | The object to move. |
|-------------|---------------------|

### 9.59.3.6 operator=() [2/2]

```
template<typename InRndIt = typename std::vector<Vec>::iterator, typename OutRndIt = typename
std::vector<bool>::iterator, typename ScoreRndIt = typename std::vector<double>::iterator>
LogisticRegressor& LinkPred::LogisticRegressor< InRndIt, OutRndIt, ScoreRndIt >::operator= (
    LogisticRegressor< InRndIt, OutRndIt, ScoreRndIt > const & that ) [default]
```

Copy assignment operator.

#### Parameters

|             |                     |
|-------------|---------------------|
| <i>that</i> | The object to copy. |
|-------------|---------------------|

### 9.59.3.7 predict()

```
template<typename InRndIt = typename std::vector<Vec>::iterator, typename OutRndIt = typename
std::vector<bool>::iterator, typename ScoreRndIt = typename std::vector<double>::iterator>
virtual void LinkPred::LogisticRegressor< InRndIt, OutRndIt, ScoreRndIt >::predict (
    InRndIt inBegin,
    InRndIt inEnd,
    ScoreRndIt scoresBegin ) [virtual]
```

Predict.

#### Parameters

|                    |                                                                  |
|--------------------|------------------------------------------------------------------|
| <i>inBegin</i>     | Iterator to the first instance features (input).                 |
| <i>inEnd</i>       | Iterator to one-past-the-last instance features (input).         |
| <i>scoresBegin</i> | Iterator to the first location where to store prediction scores. |

### 9.59.3.8 setLambda()

```
template<typename InRndIt = typename std::vector<Vec>::iterator, typename OutRndIt = typename
std::vector<bool>::iterator, typename ScoreRndIt = typename std::vector<double>::iterator>
```

```
void LinkPred::LogisticRegressor< InRndIt, OutRndIt, ScoreRndIt >::setLambda (
    double lambda ) [inline]
```

Set the regularization coefficient.

#### Parameters

|               |                                     |
|---------------|-------------------------------------|
| <i>lambda</i> | The new regularization coefficient. |
|---------------|-------------------------------------|

### 9.59.3.9 setTol()

```
template<typename InRndIt = typename std::vector<Vec>::iterator, typename OutRndIt = typename
std::vector<bool>::iterator, typename ScoreRndIt = typename std::vector<double>::iterator>
void LinkPred::LogisticRegressor< InRndIt, OutRndIt, ScoreRndIt >::setTol (
    double tol ) [inline]
```

Set the tolerance.

#### Parameters

|            |                                 |
|------------|---------------------------------|
| <i>tol</i> | The new value of the tolerance. |
|------------|---------------------------------|

The documentation for this class was generated from the following file:

- [include/linkpred/ml/classifiers/logistic/logisticregresser.hpp](#)

## 9.60 LinkPred::LogMDSCG Class Reference

Optimization problem associated with multidimensional scaling using the logarithmic (MULTISCALE) loss function.

```
#include <logmdscg.hpp>
```

Inheritance diagram for LinkPred::LogMDSCG:

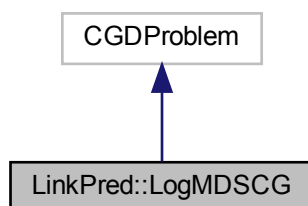

Collaboration diagram for LinkPred::LogMDSCG:

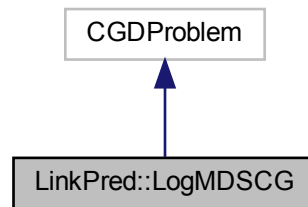

## Public Member Functions

- `LogMDSCG` (`std::size_t nbNodes`, `std::size_t nbKnownCouples`, `double *sqDist`, `double *weight`, `std::size_t dim`, `double *coords`, `long int seed`)
- `LogMDSCG` (`const LogMDSCG &that`)=`delete`
- `LogMDSCG &operator=` (`const LogMDSCG &that`)=`delete`
- `LogMDSCG` (`LogMDSCG &&that`)=`delete`
- `LogMDSCG &operator=` (`LogMDSCG &&that`)=`delete`
- virtual void `init` (`double *x`, `CG::INT n`)
- virtual double `f` (`double *x`, `CG::INT n`)
- virtual void `grad` (`double *grad_f`, `double *x`, `CG::INT n`)
- virtual double `fgrad` (`double *grad_f`, `double *x`, `CG::INT n`)
- virtual void `finalize` (`double *x`, `CG::INT n`)
- virtual `~LogMDSCG` ()=`default`

### 9.60.1 Detailed Description

Optimization problem associated with multidimensional scaling using the logarithmic (MULTISCALE) loss function.

### 9.60.2 Constructor & Destructor Documentation

#### 9.60.2.1 LogMDSCG() [1/3]

```

LinkPred::LogMDSCG::LogMDSCG (
    std::size_t nbNodes,
    std::size_t nbKnownCouples,
    double * sqDist,
    double * weight,
    std::size_t dim,
    double * coords,
    long int seed )

```

Constructor.

## Parameters

|                       |                                                                                                      |
|-----------------------|------------------------------------------------------------------------------------------------------|
| <i>nbNodes</i>        | Number of nodes (or more generally, the number of data points).                                      |
| <i>nbKnownCouples</i> | Number of couples for which the target distance is specified.                                        |
| <i>sqDist</i>         | Upper triangular matrix of squared distances without the diagonal stored sequentially as one vector. |
| <i>weight</i>         | The weight associated with every distance (can be zero, if the distance is not relevant or unknown). |
| <i>dim</i>            | The problem dimensionality.                                                                          |
| <i>coords</i>         | The coordinates (this is the solution to the problem).                                               |
| <i>seed</i>           | The random number generator's seed.                                                                  |

**9.60.2.2 LogMDSCG()** [2/3]

```
LinkPred::LogMDSCG::LogMDSCG (  
    const LogMDSCG & that ) [delete]
```

Deleted copy constructor.

## Parameters

|             |                     |
|-------------|---------------------|
| <i>that</i> | The object to copy. |
|-------------|---------------------|

**9.60.2.3 LogMDSCG()** [3/3]

```
LinkPred::LogMDSCG::LogMDSCG (  
    LogMDSCG && that ) [delete]
```

Deleted move constructor.

## Parameters

|             |                     |
|-------------|---------------------|
| <i>that</i> | The object to move. |
|-------------|---------------------|

**9.60.2.4 ~LogMDSCG()**

```
virtual LinkPred::LogMDSCG::~~LogMDSCG ( ) [virtual], [default]
```

Default destructor.

### 9.60.3 Member Function Documentation

#### 9.60.3.1 f()

```
virtual double LinkPred::LogMDSCG::f (
    double * x,
    CG::INT n ) [virtual]
```

Objective function.

##### Parameters

|     |                |
|-----|----------------|
| $x$ | The variables. |
| $n$ | The size.      |

##### Returns

The value of the objective.

#### 9.60.3.2 fgrad()

```
virtual double LinkPred::LogMDSCG::fgrad (
    double * grad_f,
    double * x,
    CG::INT n ) [virtual]
```

Compute objective and gradient at the same time. This is a default implementation that should be overloaded if needed.

##### Parameters

|                       |                        |
|-----------------------|------------------------|
| $grad_{\leftarrow f}$ | The gradient (output). |
| $x$                   | The variables.         |
| $n$                   | The size.              |

##### Returns

The value of the objective.

#### 9.60.3.3 finalize()

```
virtual void LinkPred::LogMDSCG::finalize (
    double * x,
    CG::INT n ) [virtual]
```

Finalize the solution.

#### Parameters

|     |                |
|-----|----------------|
| $x$ | The variables. |
| $n$ | The size.      |

### 9.60.3.4 grad()

```
virtual void LinkPred::LogMDSCG::grad (
    double * grad_f,
    double * x,
    CG::INT n ) [virtual]
```

Gradient.

#### Parameters

|                              |                        |
|------------------------------|------------------------|
| $\text{grad}_{\leftarrow f}$ | The gradient (output). |
| $x$                          | The variables.         |
| $n$                          | The size.              |

### 9.60.3.5 init()

```
virtual void LinkPred::LogMDSCG::init (
    double * x,
    CG::INT n ) [virtual]
```

Initializes  $x$ .

#### Parameters

|     |                |
|-----|----------------|
| $x$ | The variables. |
| $n$ | The size.      |

### 9.60.3.6 operator=() [1/2]

```
LogMDSCG& LinkPred::LogMDSCG::operator= (
    const LogMDSCG & that ) [delete]
```

Deleted copy assignment operator.

## Parameters

|             |                     |
|-------------|---------------------|
| <i>that</i> | The object to copy. |
|-------------|---------------------|

**9.60.3.7 operator=()** [2/2]

```
LogMDSCG& LinkPred::LogMDSCG::operator= (
    LogMDSCG && that ) [delete]
```

Deleted move assignment operator.

## Parameters

|             |                     |
|-------------|---------------------|
| <i>that</i> | The object to move. |
|-------------|---------------------|

The documentation for this class was generated from the following file:

- [include/linkpred/numerical/mds/logmdscg.hpp](#)

## 9.61 LinkPred::LogRegCG< InRndIt, OutRndIt > Class Template Reference

Logistic regression optimization problem.

```
#include <logregcg.hpp>
```

Inheritance diagram for LinkPred::LogRegCG< InRndIt, OutRndIt >:

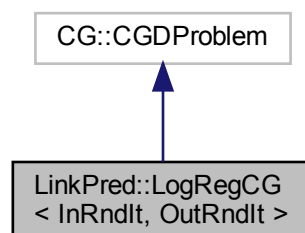



Collaboration diagram for LinkPred::LogRegCG< InRndIt, OutRndIt >:

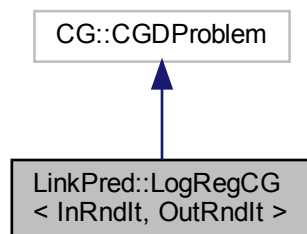

## Public Member Functions

- [LogRegCG](#) (InRndIt trInBegin, InRndIt trInEnd, OutRndIt trOutBegin, OutRndIt trOutEnd, double lambda, long int seed)
- [LogRegCG](#) (const [LogRegCG](#) &that)=delete
- [LogRegCG](#) & [operator=](#) (const [LogRegCG](#) &that)=delete
- [LogRegCG](#) ([LogRegCG](#) &&that)=delete
- [LogRegCG](#) & [operator=](#) ([LogRegCG](#) &&that)=delete
- virtual void [init](#) (double \*theta, CG::INT n)
- virtual double [f](#) (double \*theta, CG::INT n)
- virtual void [grad](#) (double \*grad\_f, double \*theta, CG::INT n)
- virtual double [fgrad](#) (double \*grad\_f, double \*theta, CG::INT n)
- virtual void [finalize](#) (double \*theta, CG::INT n)
- double [getLambda](#) () const
- void [setLambda](#) (double lambda)
- virtual [~LogRegCG](#) ()=default

### 9.61.1 Detailed Description

```
template<typename InRndIt = typename std::vector<Vec>::iterator, typename OutRndIt = typename std::vector<bool>::iterator>
class LinkPred::LogRegCG< InRndIt, OutRndIt >
```

Logistic regression optimization problem.

#### Template Parameters

|                 |                                 |
|-----------------|---------------------------------|
| <i>InRndIt</i>  | Input (features) iterator type. |
| <i>OutRndIt</i> | Output (class) iterator type.   |

## 9.61.2 Constructor & Destructor Documentation

### 9.61.2.1 LogRegCG() [1/3]

```
template<typename InRndIt = typename std::vector<Vec>::iterator, typename OutRndIt = typename
std::vector<bool>::iterator>
LinkPred::LogRegCG< InRndIt, OutRndIt >::LogRegCG (
    InRndIt trInBegin,
    InRndIt trInEnd,
    OutRndIt trOutBegin,
    OutRndIt trOutEnd,
    double lambda,
    long int seed ) [inline]
```

Constructor.

#### Parameters

|                   |                                                         |
|-------------------|---------------------------------------------------------|
| <i>trInBegin</i>  | Iterator to the first example features (input).         |
| <i>trInEnd</i>    | Iterator to one-past-the-last example features (input). |
| <i>trOutBegin</i> | Iterator to the first example class (output).           |
| <i>trOutEnd</i>   | Iterator to one-past-the-last example class (output).   |
| <i>lambda</i>     | Regularization coefficient.                             |
| <i>seed</i>       | The random number generator's seed.                     |

### 9.61.2.2 LogRegCG() [2/3]

```
template<typename InRndIt = typename std::vector<Vec>::iterator, typename OutRndIt = typename
std::vector<bool>::iterator>
LinkPred::LogRegCG< InRndIt, OutRndIt >::LogRegCG (
    const LogRegCG< InRndIt, OutRndIt > & that ) [delete]
```

Deleted copy constructor.

#### Parameters

|             |                     |
|-------------|---------------------|
| <i>that</i> | The object to copy. |
|-------------|---------------------|

### 9.61.2.3 LogRegCG() [3/3]

```
template<typename InRndIt = typename std::vector<Vec>::iterator, typename OutRndIt = typename
std::vector<bool>::iterator>
```

```
LinkPred::LogRegCG< InRndIt, OutRndIt >::LogRegCG (
    LogRegCG< InRndIt, OutRndIt > && that ) [delete]
```

Deleted move constructor.

#### Parameters

|             |                     |
|-------------|---------------------|
| <i>that</i> | The object to move. |
|-------------|---------------------|

### 9.61.2.4 ~LogRegCG()

```
template<typename InRndIt = typename std::vector<Vec>::iterator, typename OutRndIt = typename
std::vector<bool>::iterator>
virtual LinkPred::LogRegCG< InRndIt, OutRndIt >::~~LogRegCG ( ) [virtual], [default]
```

Destructor.

## 9.61.3 Member Function Documentation

### 9.61.3.1 f()

```
template<typename InRndIt = typename std::vector<Vec>::iterator, typename OutRndIt = typename
std::vector<bool>::iterator>
virtual double LinkPred::LogRegCG< InRndIt, OutRndIt >::f (
    double * theta,
    CG::INT n ) [virtual]
```

Objective function.

#### Parameters

|              |                |
|--------------|----------------|
| <i>theta</i> | The variables. |
| <i>n</i>     | The size.      |

#### Returns

The value of the objective.

### 9.61.3.2 fgrad()

```
template<typename InRndIt = typename std::vector<Vec>::iterator, typename OutRndIt = typename
std::vector<bool>::iterator>
```

```
virtual double LinkPred::LogRegCG< InRndIt, OutRndIt >::fgrad (
    double * grad_f,
    double * theta,
    CG::INT n ) [virtual]
```

Compute objective and gradient at the same time. This is a default implementation that should be overloaded if needed.

#### Parameters

|                         |                        |
|-------------------------|------------------------|
| <i>grad<sub>f</sub></i> | The gradient (output). |
| <i>theta</i>            | The variables.         |
| <i>n</i>                | The size.              |

#### Returns

The value of the objective.

### 9.61.3.3 finalize()

```
template<typename InRndIt = typename std::vector<Vec>::iterator, typename OutRndIt = typename
std::vector<bool>::iterator>
virtual void LinkPred::LogRegCG< InRndIt, OutRndIt >::finalize (
    double * theta,
    CG::INT n ) [inline], [virtual]
```

Finalize the solution.

#### Parameters

|              |                |
|--------------|----------------|
| <i>theta</i> | The variables. |
| <i>n</i>     | The size.      |

### 9.61.3.4 getLambda()

```
template<typename InRndIt = typename std::vector<Vec>::iterator, typename OutRndIt = typename
std::vector<bool>::iterator>
double LinkPred::LogRegCG< InRndIt, OutRndIt >::getLambda ( ) const [inline]
```

#### Returns

The regularization coefficient.

### 9.61.3.5 grad()

```
template<typename InRndIt = typename std::vector<Vec>::iterator, typename OutRndIt = typename
std::vector<bool>::iterator>
virtual void LinkPred::LogRegCG< InRndIt, OutRndIt >::grad (
    double * grad_f,
    double * theta,
    CG::INT n ) [virtual]
```

Gradient.

#### Parameters

|               |                        |
|---------------|------------------------|
| <i>grad_f</i> | The gradient (output). |
| <i>theta</i>  | The variables.         |
| <i>n</i>      | The size.              |

### 9.61.3.6 init()

```
template<typename InRndIt = typename std::vector<Vec>::iterator, typename OutRndIt = typename
std::vector<bool>::iterator>
virtual void LinkPred::LogRegCG< InRndIt, OutRndIt >::init (
    double * theta,
    CG::INT n ) [virtual]
```

Initializes theta.

#### Parameters

|              |                |
|--------------|----------------|
| <i>theta</i> | The variables. |
| <i>n</i>     | The size.      |

### 9.61.3.7 operator=() [1/2]

```
template<typename InRndIt = typename std::vector<Vec>::iterator, typename OutRndIt = typename
std::vector<bool>::iterator>
LogRegCG& LinkPred::LogRegCG< InRndIt, OutRndIt >::operator= (
    const LogRegCG< InRndIt, OutRndIt > & that ) [delete]
```

Deleted copy assignment operator.

#### Parameters

|             |                     |
|-------------|---------------------|
| <i>that</i> | The object to copy. |
|-------------|---------------------|

### 9.61.3.8 operator=() [2/2]

```
template<typename InRndIt = typename std::vector<Vec>::iterator, typename OutRndIt = typename
std::vector<bool>::iterator>
LogRegCG& LinkPred::LogRegCG< InRndIt, OutRndIt >::operator= (
    LogRegCG< InRndIt, OutRndIt > && that ) [delete]
```

Deleted move assignment operator.

#### Parameters

|             |                     |
|-------------|---------------------|
| <i>that</i> | The object to move. |
|-------------|---------------------|

### 9.61.3.9 setLambda()

```
template<typename InRndIt = typename std::vector<Vec>::iterator, typename OutRndIt = typename
std::vector<bool>::iterator>
void LinkPred::LogRegCG< InRndIt, OutRndIt >::setLambda (
    double lambda ) [inline]
```

Set the regularization coefficient.

#### Parameters

|               |                                     |
|---------------|-------------------------------------|
| <i>lambda</i> | The new regularization coefficient. |
|---------------|-------------------------------------|

The documentation for this class was generated from the following file:

- [include/linkpred/ml/classifiers/logistic/logregcg.hpp](#)

## 9.62 LinkPred::LPSim Class Reference

LP similarity (negative the Lp norm).

```
#include <lpsim.hpp>
```

Inheritance diagram for LinkPred::LPSim:

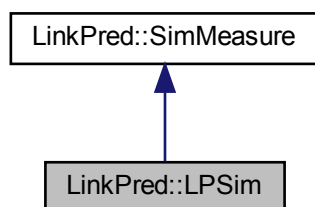

Collaboration diagram for LinkPred::LPSim:

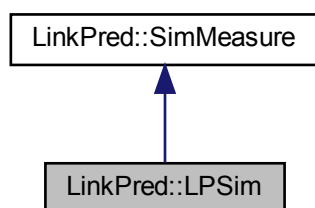

## Public Member Functions

- [LPSim](#) (double p)
- [LPSim](#) ([LPSim](#) const &that)=default
- [LPSim](#) & [operator=](#) ([LPSim](#) const &that)=default
- [LPSim](#) ([LPSim](#) &&that)=default
- [LPSim](#) & [operator=](#) ([LPSim](#) &&that)=default
- virtual double [sim](#) ([Vec](#) const &v1, [Vec](#) const &v2)
- double [getP](#) () const
- void [setP](#) (double p)
- virtual [~LPSim](#) ()=default

### 9.62.1 Detailed Description

LP similarity (negative the Lp norm).

### 9.62.2 Constructor & Destructor Documentation

**9.62.2.1 LPSim()** [1/3]

```
LinkPred::LPSim::LPSim (
    double p ) [inline]
```

Constructor.

Parameters

|          |                    |
|----------|--------------------|
| <i>p</i> | The p of the norm. |
|----------|--------------------|

**9.62.2.2 LPSim()** [2/3]

```
LinkPred::LPSim::LPSim (
    LPSim const & that ) [default]
```

Copy constructor.

Parameters

|             |                     |
|-------------|---------------------|
| <i>that</i> | The object to copy. |
|-------------|---------------------|

**9.62.2.3 LPSim()** [3/3]

```
LinkPred::LPSim::LPSim (
    LPSim && that ) [default]
```

Move constructor.

Parameters

|             |                     |
|-------------|---------------------|
| <i>that</i> | The object to move. |
|-------------|---------------------|

**9.62.2.4 ~LPSim()**

```
virtual LinkPred::LPSim::~~LPSim ( ) [virtual], [default]
```

Destructor.

**9.62.3 Member Function Documentation**



### 9.62.3.1 getP()

```
double LinkPred::LPSim::getP ( ) const [inline]
```

#### Returns

The power  $p$  of the norm.

### 9.62.3.2 operator=() [1/2]

```
LPSim& LinkPred::LPSim::operator= (
    LPSim && that ) [default]
```

Move assignment operator.

#### Parameters

|             |                     |
|-------------|---------------------|
| <i>that</i> | The object to move. |
|-------------|---------------------|

### 9.62.3.3 operator=() [2/2]

```
LPSim& LinkPred::LPSim::operator= (
    LPSim const & that ) [default]
```

Copy assignment operator.

#### Parameters

|             |                     |
|-------------|---------------------|
| <i>that</i> | The object to copy. |
|-------------|---------------------|

### 9.62.3.4 setP()

```
void LinkPred::LPSim::setP (
    double p ) [inline]
```

Set the power  $p$  of the norm.

#### Parameters

|     |                            |
|-----|----------------------------|
| $p$ | The power $p$ of the norm. |
|-----|----------------------------|

### 9.62.3.5 sim()

```
virtual double LinkPred::LPSim::sim (
    Vec const & v1,
    Vec const & v2 ) [virtual]
```

Compute the similarity between two vectors.

#### Parameters

|           |                                                             |
|-----------|-------------------------------------------------------------|
| <i>v1</i> | First vector.                                               |
| <i>v2</i> | Second vector. Must be of the same dimension as <i>v1</i> . |

#### Returns

The similarity between *v1* and *v2*.

Implements [LinkPred::SimMeasure](#).

The documentation for this class was generated from the following file:

- [include/linkpred/ml/simmeasures/lpsim.hpp](#)

## 9.63 LinkPred::MatFact< Network > Class Template Reference

Contains the implementation of an algorithm for embedding a network using matrix factorization. Reference: Koren, Y., Bell, R., and Volinsky, C. (2009). Matrix factorization techniques for recommender systems. *Computer*, 42(8):30–37 Ahmed, A., Shervashidze, N., Narayanamurthy, S., Josifovski, V., and Smola, A. J. (2013). Distributed large-scale natural graph factorization. In *Proceedings of the 22nd International Conference on World Wide Web, WWW '13*, pages 37–48, New York, NY, USA. Association for Computing Machinery.

```
#include <matfact.hpp>
```

Inheritance diagram for LinkPred::MatFact< Network >:

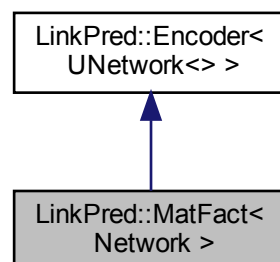

Collaboration diagram for LinkPred::MatFact< Network >:

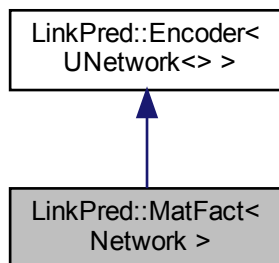

## Public Member Functions

- [MatFact](#) (std::shared\_ptr< Network const > net, long int seed)
- [MatFact](#) (MatFact const &that)=default
- [MatFact](#) & [operator=](#) (MatFact const &that)=default
- [MatFact](#) (MatFact &&that)=default
- [MatFact](#) & [operator=](#) (MatFact &&that)=default
- virtual void [init](#) ()
- virtual void [encode](#) ()
- const int [getDefaultDim](#) () const
- double [getLambda](#) () const
- void [setLambda](#) (double lambda)
- double [getNegRatio](#) () const
- void [setNegRatio](#) (double negRatio)
- double [getPosRatio](#) () const
- void [setPosRatio](#) (double posRatio)
- double [getTol](#) () const
- void [setTol](#) (double tol)
- virtual void [setWeightMap](#) (const [WeightMapSP](#) &weightMap)
- virtual [~MatFact](#) ()=default

## Additional Inherited Members

### 9.63.1 Detailed Description

```
template<typename Network = UNetwork<>>
class LinkPred::MatFact< Network >
```

Contains the implementation of an algorithm for embedding a network using matrix factorization. Reference: Koren, Y., Bell, R., and Volinsky, C. (2009). Matrix factorization techniques for recommender systems. *Computer*, 42(8):30–37 Ahmed, A., Shervashidze, N., Narayanamurthy, S., Josifovski, V., and Smola, A. J. (2013). Distributed large-scale natural graph factorization. In *Proceedings of the 22nd International Conference on World Wide Web, WWW '13*, pages 37–48, New York, NY, USA. Association for Computing Machinery.

## Template Parameters

|                |                   |
|----------------|-------------------|
| <i>Network</i> | The network type. |
|----------------|-------------------|

## 9.63.2 Constructor & Destructor Documentation

### 9.63.2.1 MatFact() [1/3]

```
template<typename Network = UNetwork<>>
LinkPred::MatFact< Network >::MatFact (
    std::shared_ptr< Network const > net,
    long int seed ) [inline]
```

Constructor.

## Parameters

|             |                               |
|-------------|-------------------------------|
| <i>net</i>  | The network.                  |
| <i>seed</i> | Random number generator seed. |

### 9.63.2.2 MatFact() [2/3]

```
template<typename Network = UNetwork<>>
LinkPred::MatFact< Network >::MatFact (
    MatFact< Network > const & that ) [default]
```

Copy constructor.

## Parameters

|             |                     |
|-------------|---------------------|
| <i>that</i> | The object to copy. |
|-------------|---------------------|

### 9.63.2.3 MatFact() [3/3]

```
template<typename Network = UNetwork<>>
LinkPred::MatFact< Network >::MatFact (
    MatFact< Network > && that ) [default]
```

Move constructor.

## Parameters

|             |                     |
|-------------|---------------------|
| <i>that</i> | The object to move. |
|-------------|---------------------|

**9.63.2.4 ~MatFact()**

```
template<typename Network = UNetwork<>>
virtual LinkPred::MatFact< Network >::~~MatFact ( ) [virtual], [default]
```

Destructor.

**9.63.3 Member Function Documentation****9.63.3.1 encode()**

```
template<typename Network = UNetwork<>>
virtual void LinkPred::MatFact< Network >::encode ( ) [virtual]
```

Encode the network.

Implements [LinkPred::Encoder< UNetwork<> >](#).

**9.63.3.2 getDefaultDim()**

```
template<typename Network = UNetwork<>>
const int LinkPred::MatFact< Network >::getDefaultDim ( ) const [inline]
```

## Returns

The default embedding dimension.

**9.63.3.3 getLambda()**

```
template<typename Network = UNetwork<>>
double LinkPred::MatFact< Network >::getLambda ( ) const [inline]
```

## Returns

The regularization coefficient.

#### 9.63.3.4 getNegRatio()

```
template<typename Network = UNetwork<>>
double LinkPred::MatFact< Network >::getNegRatio ( ) const [inline]
```

##### Returns

The ratio of negative edges used for fitting the model.

#### 9.63.3.5 getPosRatio()

```
template<typename Network = UNetwork<>>
double LinkPred::MatFact< Network >::getPosRatio ( ) const [inline]
```

##### Returns

The ratio of positive edges used for fitting the model.

#### 9.63.3.6 getTol()

```
template<typename Network = UNetwork<>>
double LinkPred::MatFact< Network >::getTol ( ) const [inline]
```

##### Returns

The tolerance for stopping the optimization.

#### 9.63.3.7 init()

```
template<typename Network = UNetwork<>>
virtual void LinkPred::MatFact< Network >::init ( ) [virtual]
```

Initialize encoder.

Implements [LinkPred::Encoder< UNetwork<> >](#).

#### 9.63.3.8 operator=() [1/2]

```
template<typename Network = UNetwork<>>
MatFact& LinkPred::MatFact< Network >::operator= (
    MatFact< Network > && that ) [default]
```

Move assignment operator.

## Parameters

|             |                     |
|-------------|---------------------|
| <i>that</i> | The object to move. |
|-------------|---------------------|

**9.63.3.9 operator=()** [2/2]

```
template<typename Network = UNetwork<>>
MatFact& LinkPred::MatFact< Network >::operator= (
    MatFact< Network > const & that ) [default]
```

Copy assignment operator.

## Parameters

|             |                     |
|-------------|---------------------|
| <i>that</i> | The object to copy. |
|-------------|---------------------|

**9.63.3.10 setLambda()**

```
template<typename Network = UNetwork<>>
void LinkPred::MatFact< Network >::setLambda (
    double lambda ) [inline]
```

Set the regularization coefficient.

## Parameters

|               |                                 |
|---------------|---------------------------------|
| <i>lambda</i> | The regularization coefficient. |
|---------------|---------------------------------|

**9.63.3.11 setNegRatio()**

```
template<typename Network = UNetwork<>>
void LinkPred::MatFact< Network >::setNegRatio (
    double negRatio ) [inline]
```

Set the ratio of negative edges used for fitting the model.

## Parameters

|                 |                                                         |
|-----------------|---------------------------------------------------------|
| <i>negRatio</i> | The ratio of negative edges used for fitting the model. |
|-----------------|---------------------------------------------------------|

**9.63.3.12 setPosRatio()**

```
template<typename Network = UNetwork<>>
void LinkPred::MatFact< Network >::setPosRatio (
    double posRatio ) [inline]
```

Set the ratio of positive edges used for fitting the model.

**Parameters**

|                 |                                                         |
|-----------------|---------------------------------------------------------|
| <i>posRatio</i> | The ratio of positive edges used for fitting the model. |
|-----------------|---------------------------------------------------------|

**9.63.3.13 setTol()**

```
template<typename Network = UNetwork<>>
void LinkPred::MatFact< Network >::setTol (
    double tol ) [inline]
```

Set the tolerance for stopping the optimization.

**Parameters**

|            |                                              |
|------------|----------------------------------------------|
| <i>tol</i> | The tolerance for stopping the optimization. |
|------------|----------------------------------------------|

**9.63.3.14 setWeightMap()**

```
template<typename Network = UNetwork<>>
virtual void LinkPred::MatFact< Network >::setWeightMap (
    const WeightMapSP & weightMap ) [inline], [virtual]
```

Set the edge weight map.

**Parameters**

|                  |                      |
|------------------|----------------------|
| <i>weightMap</i> | The edge weight map. |
|------------------|----------------------|

Reimplemented from [LinkPred::Encoder< UNetwork<> >](#).

The documentation for this class was generated from the following file:

- [include/linkpred/graphalg/encoders/matfact/matfact.hpp](#)



## 9.64 LinkPred::MatFactCG Class Reference

Optimization problem associated with matrix factorization.

```
#include <matfactcg.hpp>
```

Inheritance diagram for LinkPred::MatFactCG:

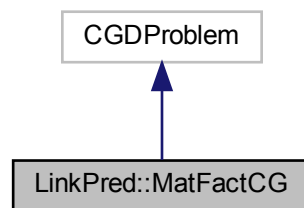

Collaboration diagram for LinkPred::MatFactCG:

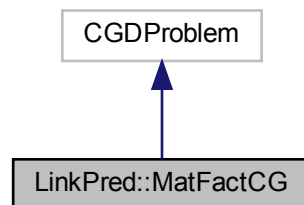

### Public Member Functions

- `MatFactCG` (long int nbNodes, std::vector< `MatFactPbData` > const &pbData, int dim, double lambda, long int seed)
- `MatFactCG` (const `MatFactCG` &that)=delete
- `MatFactCG` & `operator=` (const `MatFactCG` &that)=delete
- `MatFactCG` (`MatFactCG` &&that)=delete
- `MatFactCG` & `operator=` (`MatFactCG` &&that)=delete
- virtual void `init` (double \*x, CG::INT n)
- virtual double `f` (double \*x, CG::INT n)
- virtual void `grad` (double \*grad\_f, double \*x, CG::INT n)
- virtual double `fgrad` (double \*grad\_f, double \*x, CG::INT n)
- virtual void `finalize` (double \*x, CG::INT n)
- virtual `~MatFactCG` ()=default

## 9.64.1 Detailed Description

Optimization problem associated with matrix factorization.

## 9.64.2 Constructor & Destructor Documentation

### 9.64.2.1 MatFactCG() [1/3]

```
LinkPred::MatFactCG::MatFactCG (
    long int nbNodes,
    std::vector< MatFactPbData > const & pbData,
    int dim,
    double lambda,
    long int seed )
```

Constructor.

#### Parameters

|                |                                     |
|----------------|-------------------------------------|
| <i>nbNodes</i> | The number of nodes in the network. |
| <i>pbData</i>  | The problem data.                   |
| <i>dim</i>     | The problem dimensionality.         |
| <i>lambda</i>  | Regularization coefficient.         |
| <i>seed</i>    | The random number generator's seed. |

### 9.64.2.2 MatFactCG() [2/3]

```
LinkPred::MatFactCG::MatFactCG (
    const MatFactCG & that ) [delete]
```

Deleted copy constructor.

#### Parameters

|             |                     |
|-------------|---------------------|
| <i>that</i> | The object to copy. |
|-------------|---------------------|

### 9.64.2.3 MatFactCG() [3/3]

```
LinkPred::MatFactCG::MatFactCG (
    MatFactCG && that ) [delete]
```

Deleted move constructor.

## Parameters

|             |                     |
|-------------|---------------------|
| <i>that</i> | The object to move. |
|-------------|---------------------|

**9.64.2.4 ~MatFactCG()**

```
virtual LinkPred::MatFactCG::~MatFactCG ( ) [virtual], [default]
```

Default destructor.

**9.64.3 Member Function Documentation****9.64.3.1 f()**

```
virtual double LinkPred::MatFactCG::f (
    double * x,
    CG::INT n ) [virtual]
```

Objective function.

## Parameters

|          |                |
|----------|----------------|
| <i>x</i> | The variables. |
| <i>n</i> | The size.      |

## Returns

The value of the objective.

**9.64.3.2 fgrad()**

```
virtual double LinkPred::MatFactCG::fgrad (
    double * grad_f,
    double * x,
    CG::INT n ) [virtual]
```

Compute objective and gradient at the same time. This is a default implementation that should be overloaded if needed.

**Parameters**

|                       |                        |
|-----------------------|------------------------|
| $grad_{\leftarrow f}$ | The gradient (output). |
| $x$                   | The variables.         |
| $n$                   | The size.              |

**Returns**

The value of the objective.

**9.64.3.3 finalize()**

```
virtual void LinkPred::MatFactCG::finalize (
    double *  $x$ ,
    CG::INT  $n$  ) [virtual]
```

Finalize the solution.

**Parameters**

|     |                |
|-----|----------------|
| $x$ | The variables. |
| $n$ | The size.      |

**9.64.3.4 grad()**

```
virtual void LinkPred::MatFactCG::grad (
    double *  $grad_f$ ,
    double *  $x$ ,
    CG::INT  $n$  ) [virtual]
```

Gradient.

**Parameters**

|                       |                        |
|-----------------------|------------------------|
| $grad_{\leftarrow f}$ | The gradient (output). |
| $x$                   | The variables.         |
| $n$                   | The size.              |

**9.64.3.5 init()**

```
virtual void LinkPred::MatFactCG::init (
```

```
double * x,
CG::INT n ) [virtual]
```

Initializes x.

#### Parameters

|          |                |
|----------|----------------|
| <i>x</i> | The variables. |
| <i>n</i> | The size.      |

#### 9.64.3.6 operator=() [1/2]

```
MatFactCG& LinkPred::MatFactCG::operator= (
    const MatFactCG & that ) [delete]
```

Deleted copy assignment operator.

#### Parameters

|             |                     |
|-------------|---------------------|
| <i>that</i> | The object to copy. |
|-------------|---------------------|

#### 9.64.3.7 operator=() [2/2]

```
MatFactCG& LinkPred::MatFactCG::operator= (
    MatFactCG && that ) [delete]
```

Deleted move assignment operator.

#### Parameters

|             |                     |
|-------------|---------------------|
| <i>that</i> | The object to move. |
|-------------|---------------------|

The documentation for this class was generated from the following file:

- include/linkpred/graphalg/encoders/matfact/[matfactcg.hpp](#)

## 9.65 LinkPred::MatFactPbData Struct Reference

A simple structure to store matrix factiozation problem data.

```
#include <matfactcg.hpp>
```

## Public Attributes

- long int [i](#)
- long int [j](#)
- double [target](#)

### 9.65.1 Detailed Description

A simple structure to store matrix factoization problem data.

### 9.65.2 Member Data Documentation

#### 9.65.2.1 [i](#)

```
long int LinkPred::MatFactPbData::i
```

Start node.

#### 9.65.2.2 [j](#)

```
long int LinkPred::MatFactPbData::j
```

End node.

#### 9.65.2.3 [target](#)

```
double LinkPred::MatFactPbData::target
```

Target value (0/1 for unweighted graphs).

The documentation for this struct was generated from the following file:

- [include/linkpred/graphalg/encoders/matfact/matfactcg.hpp](#)

## 9.66 LinkPred::MDS Class Reference

Solve the [MDS](#) problem.

```
#include <mds.hpp>
```

## Public Member Functions

- [MDS](#) ()=default
- [MDS](#) ([MDSAlg](#) alg, double tol, std::size\_t nbRuns)
- [MDSAlg](#) getAlg ()
- void [setAlg](#) ([MDSAlg](#) alg)
- double [getTol](#) ()
- void [setTol](#) (double tol)
- std::size\_t [getNbRuns](#) ()
- void [setNbRuns](#) (std::size\_t nbRuns)
- double [solve](#) (std::size\_t nbNodes, std::size\_t nbKnownCouples, double \*sqDist, double \*weight, std::size\_t dim, double \*coord, long int seed, bool init=true)
- double [cgMDS](#) (std::size\_t nbNodes, std::size\_t nbKnownCouples, std::size\_t dim, double \*sqDist, double \*weight, double \*coord, long int seed, bool init)
- virtual [~MDS](#) ()=default

### 9.66.1 Detailed Description

Solve the [MDS](#) problem.

### 9.66.2 Constructor & Destructor Documentation

#### 9.66.2.1 [MDS\(\)](#) [1/2]

```
LinkPred::MDS::MDS ( ) [default]
```

Constructor.

#### 9.66.2.2 [MDS\(\)](#) [2/2]

```
LinkPred::MDS::MDS (
    MDSAlg alg,
    double tol,
    std::size_t nbRuns ) [inline]
```

Constructor.

#### Parameters

|               |                                                                                               |
|---------------|-----------------------------------------------------------------------------------------------|
| <i>alg</i>    | The algorithm used to solve the <a href="#">MDS</a> problem.                                  |
| <i>tol</i>    | The tolerance.                                                                                |
| <i>nbRuns</i> | The number of times multidimensional scaling is run using different random initial positions. |

### 9.66.2.3 ~MDS()

```
virtual LinkPred::MDS::~~MDS ( ) [virtual], [default]
```

Destructor.

## 9.66.3 Member Function Documentation

### 9.66.3.1 cgMDS()

```
double LinkPred::MDS::cgMDS (
    std::size_t nbNodes,
    std::size_t nbKnownCouples,
    std::size_t dim,
    double * sqDist,
    double * weight,
    double * coord,
    long int seed,
    bool init )
```

[MDS](#) using CG.

#### Parameters

|                       |                                                                                                                                 |
|-----------------------|---------------------------------------------------------------------------------------------------------------------------------|
| <i>nbNodes</i>        | Number of nodes (or more generally, the number of data points).                                                                 |
| <i>nbKnownCouples</i> | Number of couples for which the target distance is specified.                                                                   |
| <i>sqDist</i>         | Upper triangular matrix of squared distances without the diagonal stored sequentially as one vector.                            |
| <i>weight</i>         | The weight associated with every distance (can be zero, if the distance is not relevant or unknown).                            |
| <i>dim</i>            | The problem dimensionality.                                                                                                     |
| <i>coord</i>          | The coordinates (this is the solution to the problem).                                                                          |
| <i>seed</i>           | The random number generator's seed.                                                                                             |
| <i>init</i>           | Whether to initialize points randomly or use the current values of the coordinates as the initial positions of the data points. |

#### Returns

The objective function value.

### 9.66.3.2 getAlg()

```
MDSAlg LinkPred::MDS::getAlg ( ) [inline]
```

#### Returns

The algorithm used to solve the [MDS](#) problem.



### 9.66.3.3 getNbRuns()

```
std::size_t LinkPred::MDS::getNbRuns ( ) [inline]
```

#### Returns

The number of times multidimensional scaling is run using different random initial positions.

### 9.66.3.4 getTol()

```
double LinkPred::MDS::getTol ( ) [inline]
```

#### Returns

The tolerance.

### 9.66.3.5 setAlg()

```
void LinkPred::MDS::setAlg (
    MDSAlg alg ) [inline]
```

Set the [MDS](#) algorithm.

#### Parameters

|            |                                                              |
|------------|--------------------------------------------------------------|
| <i>alg</i> | The algorithm used to solve the <a href="#">MDS</a> problem. |
|------------|--------------------------------------------------------------|

### 9.66.3.6 setNbRuns()

```
void LinkPred::MDS::setNbRuns (
    std::size_t nbRuns ) [inline]
```

Set the number of runs.

#### Parameters

|               |                                      |
|---------------|--------------------------------------|
| <i>nbRuns</i> | The new value of the number of runs. |
|---------------|--------------------------------------|

### 9.66.3.7 setTol()

```
void LinkPred::MDS::setTol (
    double tol ) [inline]
```

Set the tolerance.

#### Parameters

|            |                                 |
|------------|---------------------------------|
| <i>tol</i> | The new value of the tolerance. |
|------------|---------------------------------|

### 9.66.3.8 solve()

```
double LinkPred::MDS::solve (
    std::size_t nbNodes,
    std::size_t nbKnownCouples,
    double * sqDist,
    double * weight,
    std::size_t dim,
    double * coord,
    long int seed,
    bool init = true )
```

Solve the [MDS](#) problem.

#### Parameters

|                       |                                                                                                                                 |
|-----------------------|---------------------------------------------------------------------------------------------------------------------------------|
| <i>nbNodes</i>        | Number of nodes (or more generally, the number of data points).                                                                 |
| <i>nbKnownCouples</i> | Number of couples for which the target distance is specified.                                                                   |
| <i>sqDist</i>         | Upper triangular matrix of squared distances without the diagonal stored sequentially as one vector.                            |
| <i>weight</i>         | The weight associated with every distance (can be zero, if the distance is not relevant or unknown).                            |
| <i>dim</i>            | The problem dimensionality.                                                                                                     |
| <i>coord</i>          | The coordinates (this is the solution to the problem).                                                                          |
| <i>seed</i>           | The random number generator's seed.                                                                                             |
| <i>init</i>           | Whether to initialize points randomly or use the current values of the coordinates as the initial positions of the data points. |

#### Returns

The objective function value.

The documentation for this class was generated from the following file:

- [include/linkpred/numerical/mds/mds.hpp](#)

## 9.67 LinkPred::NetDistCalculator< Network, DistType, NbHopsType > Class Template Reference

Interface for calculating the distance between nodes in a network.

```
#include <netdistcalculator.hpp>
```

### Public Types

- using [LengthMapIdType](#) = long int
- using [NetworkSP](#) = std::shared\_ptr< Network >
- using [NodeID](#) = typename Network::NodeID
- using [Label](#) = typename Network::Label
- using [Edge](#) = typename Network::Edge
- using [NodeDistMap](#) = typename Network::template NodeMap< std::pair< DistType, NbHopsType > >
- using [NodeDistMapSP](#) = typename Network::template NodeMapSP< std::pair< DistType, NbHopsType > >
- using [EdgeLengthMap](#) = typename Network::template EdgeMap< DistType >
- using [EdgeLengthMapSP](#) = typename Network::template EdgeMapSP< DistType >

### Public Member Functions

- virtual std::pair< DistType, NbHopsType > [getDist](#) (NodeID const &i, NodeID const &j)=0
- virtual std::pair< DistType, NbHopsType > [getIndDist](#) (NodeID const &i, NodeID const &j)=0
- virtual [NodeDistMapSP](#) [getDist](#) (NodeID const &i)=0
- virtual std::pair< DistType, NbHopsType > [getMaxDist](#) (NodeID const &i)
- double [getDiscDist](#) () const
- void [setDiscDist](#) (DistType discDist)
- std::size\_t [getDiscNbHops](#) () const
- void [setDiscNbHops](#) (NbHopsType discNbHops)
- virtual [~NetDistCalculator](#) ()=default

#### 9.67.1 Detailed Description

```
template<typename Network, typename DistType, typename NbHopsType>
class LinkPred::NetDistCalculator< Network, DistType, NbHopsType >
```

Interface for calculating the distance between nodes in a network.

#### Template Parameters

|                   |                                                               |
|-------------------|---------------------------------------------------------------|
| <i>Network</i>    | The network type.                                             |
| <i>DistType</i>   | The distance type (can be an integer or floating point type). |
| <i>NbHopsType</i> | The type of the number of hops (must be an integer type).     |

#### 9.67.2 Member Typedef Documentation

### 9.67.2.1 Edge

```
template<typename Network , typename DistType , typename NbHopsType >
using LinkPred::NetDistCalculator< Network, DistType, NbHopsType >::Edge = typename Network↔
::Edge
```

Edge type.

### 9.67.2.2 EdgeLengthMap

```
template<typename Network , typename DistType , typename NbHopsType >
using LinkPred::NetDistCalculator< Network, DistType, NbHopsType >::EdgeLengthMap = typename
Network::template EdgeMap<DistType>
```

Edge length map.

### 9.67.2.3 EdgeLengthMapSP

```
template<typename Network , typename DistType , typename NbHopsType >
using LinkPred::NetDistCalculator< Network, DistType, NbHopsType >::EdgeLengthMapSP = typename
Network::template EdgeMapSP<DistType>
```

Shared pointer to an edge length map.

### 9.67.2.4 Label

```
template<typename Network , typename DistType , typename NbHopsType >
using LinkPred::NetDistCalculator< Network, DistType, NbHopsType >::Label = typename Network↔
::Label
```

Nodes label type.

### 9.67.2.5 LengthMapIdType

```
template<typename Network , typename DistType , typename NbHopsType >
using LinkPred::NetDistCalculator< Network, DistType, NbHopsType >::LengthMapIdType = long int
```

Length map ID type.

### 9.67.2.6 NetworkSP

```
template<typename Network , typename DistType , typename NbHopsType >
using LinkPred::NetDistCalculator< Network, DistType, NbHopsType >::NetworkSP = std::shared_↔
ptr<Network>
```

Shared pointer to network.

### 9.67.2.7 NodeDistMap

```
template<typename Network , typename DistType , typename NbHopsType >
using LinkPred::NetDistCalculator< Network, DistType, NbHopsType >::NodeDistMap = typename
Network::template NodeMap<std::pair<DistType, NbHopsType> >
```

Distance map.

### 9.67.2.8 NodeDistMapSP

```
template<typename Network , typename DistType , typename NbHopsType >
using LinkPred::NetDistCalculator< Network, DistType, NbHopsType >::NodeDistMapSP = typename
Network::template NodeMapSP<std::pair<DistType, NbHopsType> >
```

Shared pointer to a distance map.

### 9.67.2.9 NodeID

```
template<typename Network , typename DistType , typename NbHopsType >
using LinkPred::NetDistCalculator< Network, DistType, NbHopsType >::NodeID = typename Network↔
::NodeID
```

Nodes ID type.

## 9.67.3 Constructor & Destructor Documentation

### 9.67.3.1 ~NetDistCalculator()

```
template<typename Network , typename DistType , typename NbHopsType >
virtual LinkPred::NetDistCalculator< Network, DistType, NbHopsType >::~~NetDistCalculator ( )
[virtual], [default]
```

Destructor.

## 9.67.4 Member Function Documentation

### 9.67.4.1 getDiscDist()

```
template<typename Network , typename DistType , typename NbHopsType >
double LinkPred::NetDistCalculator< Network, DistType, NbHopsType >::getDiscDist ( ) const
[inline]
```

#### Returns

The distance assigned to disconnected nodes.

### 9.67.4.2 getDiscNbHops()

```
template<typename Network , typename DistType , typename NbHopsType >
std::size_t LinkPred::NetDistCalculator< Network, DistType, NbHopsType >::getDiscNbHops ( )
const [inline]
```

#### Returns

The value that should be assigned as number of hops between disconnected nodes.

### 9.67.4.3 getDist() [1/2]

```
template<typename Network , typename DistType , typename NbHopsType >
virtual NodeDistMapSP LinkPred::NetDistCalculator< Network, DistType, NbHopsType >::getDist (
    NodeID const & i ) [pure virtual]
```

#### Parameters

|          |              |
|----------|--------------|
| <i>i</i> | Source node. |
|----------|--------------|

#### Returns

The distance from *i* to all other nodes.

Implemented in [LinkPred::ESPLDistCalculator< UNetwork<>, double, std::size\\_t >](#).

### 9.67.4.4 getDist() [2/2]

```
template<typename Network , typename DistType , typename NbHopsType >
virtual std::pair<DistType, NbHopsType> LinkPred::NetDistCalculator< Network, DistType, Nb↔
HopsType >::getDist (
    NodeID const & i,
    NodeID const & j ) [pure virtual]
```

#### Parameters

|          |                           |
|----------|---------------------------|
| <i>i</i> | Index of the source node. |
| <i>j</i> | Index of the end node.    |

#### Returns

The distance between *i* and *j*.

Implemented in [LinkPred::ESPLDistCalculator< UNetwork<>, double, std::size\\_t >](#).

## 9.67.4.5 getIndDist()

```
template<typename Network , typename DistType , typename NbHopsType >
virtual std::pair<DistType, NbHopsType> LinkPred::NetDistCalculator< Network, DistType, NbHopsType >::getIndDist (
    NodeID const & i,
    NodeID const & j ) [pure virtual]
```

## Parameters

|          |                           |
|----------|---------------------------|
| <i>i</i> | Index of the source node. |
| <i>j</i> | Index of the end node.    |

## Returns

The distance between i and j ignoring the edge between i and j.

Implemented in [LinkPred::ESPLDistCalculator< UNetwork<>, double, std::size\\_t >](#).

## 9.67.4.6 getMaxDist()

```
template<typename Network , typename DistType , typename NbHopsType >
virtual std::pair<DistType, NbHopsType> LinkPred::NetDistCalculator< Network, DistType, NbHopsType >::getMaxDist (
    NodeID const & i ) [inline], [virtual]
```

## Parameters

|          |                           |
|----------|---------------------------|
| <i>i</i> | Index of the source node. |
|----------|---------------------------|

## Returns

The maximum distance from i to any other node in the same connected component.

## 9.67.4.7 setDiscDist()

```
template<typename Network , typename DistType , typename NbHopsType >
void LinkPred::NetDistCalculator< Network, DistType, NbHopsType >::setDiscDist (
    DistType discDist ) [inline]
```

Set the distance assigned to disconnected nodes.

## Parameters

|                 |                                              |
|-----------------|----------------------------------------------|
| <i>discDist</i> | The distance assigned to disconnected nodes. |
|-----------------|----------------------------------------------|

### 9.67.4.8 setDiscNbHops()

```
template<typename Network , typename DistType , typename NbHopsType >
void LinkPred::NetDistCalculator< Network, DistType, NbHopsType >::setDiscNbHops (
    NbHopsType discNbHops ) [inline]
```

Set the value that should be assigned as number of hops between disconnected nodes.

#### Parameters

|                   |                                                                                 |
|-------------------|---------------------------------------------------------------------------------|
| <i>discNbHops</i> | The value that should be assigned as number of hops between disconnected nodes. |
|-------------------|---------------------------------------------------------------------------------|

The documentation for this class was generated from the following file:

- include/linkpred/graphalg/shortestpaths/netdistcalculator.hpp

## 9.68 LinkPred::NetIndSimlCalculator< Network, DistType, NbHopsType > > Class Template Reference

Interface for calculating the indirect similarity between nodes in a network.

```
#include <netdistcalculator.hpp>
```

### Public Types

- using [LengthMapIdType](#) = long int
- using [NetworkSP](#) = std::shared\_ptr< Network >
- using [NodeID](#) = typename Network::NodeID
- using [Label](#) = typename Network::Label
- using [Edge](#) = typename Network::Edge
- using [EdgeLengthMap](#) = typename Network::template EdgeMap< DistType >
- using [EdgeLengthMapSP](#) = typename Network::template EdgeMapSP< DistType >

### Public Member Functions

- virtual std::tuple< DistType, DistType, NbHopsType > [getIndSiml](#) ([NodeID](#) const &i, [NodeID](#) const &j)=0
- virtual std::tuple< DistType, DistType, NbHopsType > [getDirIndSiml](#) ([NodeID](#) const &i, [NodeID](#) const &j)=0
- double [getSelfSiml](#) () const
- void [setSelfSiml](#) (DistType selfSiml)
- double [getDiscDist](#) () const
- void [setDiscDist](#) (DistType discDist)
- std::size\_t [getDiscNbHops](#) () const
- void [setDiscNbHops](#) (NbHopsType discNbHops)
- double [getLambda](#) () const
- void [setLambda](#) (double lambda)
- virtual [~NetIndSimlCalculator](#) ()=default



### 9.68.1 Detailed Description

```
template<typename Network, typename DistType, typename NbHopsType>
class LinkPred::NetIndSimlCalculator< Network, DistType, NbHopsType >
```

Interface for calculating the indirect similarity between nodes in a network.

#### Template Parameters

|                   |                                                                              |
|-------------------|------------------------------------------------------------------------------|
| <i>Network</i>    | The network type.                                                            |
| <i>DistType</i>   | The distance and similarity type (can be an integer or floating point type). |
| <i>NbHopsType</i> | The type of the number of hops (must be an integer type).                    |

### 9.68.2 Member Typedef Documentation

#### 9.68.2.1 Edge

```
template<typename Network , typename DistType , typename NbHopsType >
using LinkPred::NetIndSimlCalculator< Network, DistType, NbHopsType >::Edge = typename Network↵
::Edge
```

Edge type.

#### 9.68.2.2 EdgeLengthMap

```
template<typename Network , typename DistType , typename NbHopsType >
using LinkPred::NetIndSimlCalculator< Network, DistType, NbHopsType >::EdgeLengthMap = typename
Network::template EdgeMap<DistType>
```

Edge length map.

#### 9.68.2.3 EdgeLengthMapSP

```
template<typename Network , typename DistType , typename NbHopsType >
using LinkPred::NetIndSimlCalculator< Network, DistType, NbHopsType >::EdgeLengthMapSP =
typename Network::template EdgeMapSP<DistType>
```

Shared pointer to an edge length map.

#### 9.68.2.4 Label

```
template<typename Network , typename DistType , typename NbHopsType >
using LinkPred::NetIndSimlCalculator< Network, DistType, NbHopsType >::Label = typename Network↵
::Label
```

Nodes label type.

### 9.68.2.5 LengthMapIdType

```
template<typename Network , typename DistType , typename NbHopsType >
using LinkPred::NetIndSimlCalculator< Network, DistType, NbHopsType >::LengthMapIdType = long
int
```

Length map ID type.

### 9.68.2.6 NetworkSP

```
template<typename Network , typename DistType , typename NbHopsType >
using LinkPred::NetIndSimlCalculator< Network, DistType, NbHopsType >::NetworkSP = std::shared<
_ptr<Network>
```

Shared pointer to network.

### 9.68.2.7 NodeID

```
template<typename Network , typename DistType , typename NbHopsType >
using LinkPred::NetIndSimlCalculator< Network, DistType, NbHopsType >::NodeID = typename
Network::NodeID
```

Nodes ID type.

## 9.68.3 Constructor & Destructor Documentation

### 9.68.3.1 ~NetIndSimlCalculator()

```
template<typename Network , typename DistType , typename NbHopsType >
virtual LinkPred::NetIndSimlCalculator< Network, DistType, NbHopsType >::~~NetIndSimlCalculator
( ) [virtual], [default]
```

Destructor.

## 9.68.4 Member Function Documentation

### 9.68.4.1 getDirIndSiml()

```
template<typename Network , typename DistType , typename NbHopsType >
virtual std::tuple<DistType, DistType, NbHopsType> LinkPred::NetIndSimlCalculator< Network,
DistType, NbHopsType >::getDirIndSiml (
    NodeID const & i,
    NodeID const & j ) [pure virtual]
```

## Parameters

|          |                           |
|----------|---------------------------|
| <i>i</i> | Index of the source node. |
| <i>j</i> | Index of the end node.    |

## Returns

The directed similarity between *i* and *j* ignoring the edge between *i* and *j*.

## 9.68.4.2 getDiscDist()

```
template<typename Network , typename DistType , typename NbHopsType >
double LinkPred::NetIndSimlCalculator< Network, DistType, NbHopsType >::getDiscDist ( ) const
[inline]
```

## Returns

The distance assigned to disconnected nodes.

## 9.68.4.3 getDiscNbHops()

```
template<typename Network , typename DistType , typename NbHopsType >
std::size_t LinkPred::NetIndSimlCalculator< Network, DistType, NbHopsType >::getDiscNbHops ( )
const [inline]
```

## Returns

The value that should be assigned as number of hops between disconnected nodes.

## 9.68.4.4 getIndSiml()

```
template<typename Network , typename DistType , typename NbHopsType >
virtual std::tuple<DistType, DistType, NbHopsType> LinkPred::NetIndSimlCalculator< Network,
DistType, NbHopsType >::getIndSiml (
    NodeID const & i,
    NodeID const & j ) [pure virtual]
```

## Parameters

|          |                           |
|----------|---------------------------|
| <i>i</i> | Index of the source node. |
| <i>j</i> | Index of the end node.    |

**Returns**

The similarity between i and j ignoring the edge between i and j.

**9.68.4.5 getLambda()**

```
template<typename Network , typename DistType , typename NbHopsType >
double LinkPred::NetIndSimlCalculator< Network, DistType, NbHopsType >::getLambda ( ) const
[inline]
```

**Returns**

The conductance.

**9.68.4.6 getSelfSiml()**

```
template<typename Network , typename DistType , typename NbHopsType >
double LinkPred::NetIndSimlCalculator< Network, DistType, NbHopsType >::getSelfSiml ( ) const
[inline]
```

**Returns**

The similarity between a node and itself.

**9.68.4.7 setDiscDist()**

```
template<typename Network , typename DistType , typename NbHopsType >
void LinkPred::NetIndSimlCalculator< Network, DistType, NbHopsType >::setDiscDist (
    DistType discDist ) [inline]
```

Set the distance assigned to disconnected nodes.

**Parameters**

|                 |                                              |
|-----------------|----------------------------------------------|
| <i>discDist</i> | The distance assigned to disconnected nodes. |
|-----------------|----------------------------------------------|

**9.68.4.8 setDiscNbHops()**

```
template<typename Network , typename DistType , typename NbHopsType >
void LinkPred::NetIndSimlCalculator< Network, DistType, NbHopsType >::setDiscNbHops (
    NbHopsType discNbHops ) [inline]
```

Set the value that should be assigned as number of hops between disconnected nodes.

#### Parameters

|                   |                                                                                 |
|-------------------|---------------------------------------------------------------------------------|
| <i>discNbHops</i> | The value that should be assigned as number of hops between disconnected nodes. |
|-------------------|---------------------------------------------------------------------------------|

#### 9.68.4.9 setLambda()

```
template<typename Network , typename DistType , typename NbHopsType >
void LinkPred::NetIndSimlCalculator< Network, DistType, NbHopsType >::setLambda (
    double lambda ) [inline]
```

Set the conductance.

#### Parameters

|               |                              |
|---------------|------------------------------|
| <i>lambda</i> | The new value of the weight. |
|---------------|------------------------------|

#### 9.68.4.10 setSelfSiml()

```
template<typename Network , typename DistType , typename NbHopsType >
void LinkPred::NetIndSimlCalculator< Network, DistType, NbHopsType >::setSelfSiml (
    DistType selfSiml ) [inline]
```

Set the similarity between a node and itself.

#### Parameters

|                 |                                                      |
|-----------------|------------------------------------------------------|
| <i>selfSiml</i> | The similarity similarity between a node and itself. |
|-----------------|------------------------------------------------------|

The documentation for this class was generated from the following file:

- include/linkpred/graphalg/shortestpaths/netdistcalculator.hpp

## 9.69 LinkPred::NetSimlCalculator< Network, DistType, NbHopsType > Class Template Reference

Interface for calculating the similarity between nodes in a network.

```
#include <netdistcalculator.hpp>
```

## Public Types

- using [LengthMapIdType](#) = long int
- using [NetworkSP](#) = std::shared\_ptr< Network >
- using [NodeID](#) = typename Network::NodeID
- using [Label](#) = typename Network::Label
- using [Edge](#) = typename Network::Edge
- using [EdgeLengthMap](#) = typename Network::template EdgeMap< DistType >
- using [EdgeLengthMapSP](#) = typename Network::template EdgeMapSP< DistType >
- using [NodeSDistMap](#) = typename Network::template NodeSMap< std::pair< DistType, NbHopsType > >
- using [NodeSDistMapSP](#) = typename Network::template NodeSMapSP< std::pair< DistType, NbHopsType > >

## Public Member Functions

- virtual std::tuple< DistType, DistType, NbHopsType > [getSiml](#) ([NodeID](#) const &i, [NodeID](#) const &j)=0
- virtual std::tuple< DistType, DistType, NbHopsType > [getDirSiml](#) ([NodeID](#) const &i, [NodeID](#) const &j)=0
- virtual [NodeSDistMapSP](#) [getNnzSimlMap](#) ([NodeID](#) const &srcNode)
- virtual [NodeSDistMapSP](#) [getNnzSimlMapNoNeighb](#) ([NodeID](#) const &srcNode)
- double [getSelfSiml](#) () const
- void [setSelfSiml](#) (DistType selfSiml)
- double [getDiscDist](#) () const
- void [setDiscDist](#) (DistType discDist)
- std::size\_t [getDiscNbHops](#) () const
- void [setDiscNbHops](#) (NbHopsType discNbHops)
- double [getLambda](#) () const
- void [setLambda](#) (double lambda)
- virtual [~NetSimlCalculator](#) ()=default

### 9.69.1 Detailed Description

```
template<typename Network, typename DistType, typename NbHopsType>
class LinkPred::NetSimlCalculator< Network, DistType, NbHopsType >
```

Interface for calculating the similarity between nodes in a network.

#### Template Parameters

|                   |                                                                              |
|-------------------|------------------------------------------------------------------------------|
| <i>Network</i>    | The network type.                                                            |
| <i>DistType</i>   | The distance and similarity type (can be an integer or floating point type). |
| <i>NbHopsType</i> | The type of the number of hops (must be an integer type).                    |

### 9.69.2 Member Typedef Documentation

### 9.69.2.1 Edge

```
template<typename Network , typename DistType , typename NbHopsType >
using LinkPred::NetSimlCalculator< Network, DistType, NbHopsType >::Edge = typename Network↔
::Edge
```

Edge type.

### 9.69.2.2 EdgeLengthMap

```
template<typename Network , typename DistType , typename NbHopsType >
using LinkPred::NetSimlCalculator< Network, DistType, NbHopsType >::EdgeLengthMap = typename
Network::template EdgeMap<DistType>
```

Edge length map.

### 9.69.2.3 EdgeLengthMapSP

```
template<typename Network , typename DistType , typename NbHopsType >
using LinkPred::NetSimlCalculator< Network, DistType, NbHopsType >::EdgeLengthMapSP = typename
Network::template EdgeMapSP<DistType>
```

Shared pointer to an edge length map.

### 9.69.2.4 Label

```
template<typename Network , typename DistType , typename NbHopsType >
using LinkPred::NetSimlCalculator< Network, DistType, NbHopsType >::Label = typename Network↔
::Label
```

Nodes label type.

### 9.69.2.5 LengthMapIdType

```
template<typename Network , typename DistType , typename NbHopsType >
using LinkPred::NetSimlCalculator< Network, DistType, NbHopsType >::LengthMapIdType = long int
```

Length map ID type.

### 9.69.2.6 NetworkSP

```
template<typename Network , typename DistType , typename NbHopsType >
using LinkPred::NetSimlCalculator< Network, DistType, NbHopsType >::NetworkSP = std::shared_↔
ptr<Network>
```

Shared pointer to network.

### 9.69.2.7 NodeID

```
template<typename Network , typename DistType , typename NbHopsType >
using LinkPred::NetSimlCalculator< Network, DistType, NbHopsType >::NodeID = typename Network↔
::NodeID
```

Nodes ID type.

### 9.69.2.8 NodeSDistMap

```
template<typename Network , typename DistType , typename NbHopsType >
using LinkPred::NetSimlCalculator< Network, DistType, NbHopsType >::NodeSDistMap = typename
Network::template NodeSMap<std::pair<DistType, NbHopsType> >
```

Distance map.

### 9.69.2.9 NodeSDistMapSP

```
template<typename Network , typename DistType , typename NbHopsType >
using LinkPred::NetSimlCalculator< Network, DistType, NbHopsType >::NodeSDistMapSP = typename
Network::template NodeSMapSP<std::pair<DistType, NbHopsType> >
```

Shared pointer to a distance map.

## 9.69.3 Constructor & Destructor Documentation

### 9.69.3.1 ~NetSimlCalculator()

```
template<typename Network , typename DistType , typename NbHopsType >
virtual LinkPred::NetSimlCalculator< Network, DistType, NbHopsType >::~~NetSimlCalculator ( )
[virtual], [default]
```

Destructor.

## 9.69.4 Member Function Documentation

### 9.69.4.1 getDirSiml()

```
template<typename Network , typename DistType , typename NbHopsType >
virtual std::tuple<DistType, DistType, NbHopsType> LinkPred::NetSimlCalculator< Network,
DistType, NbHopsType >::getDirSiml (
    NodeID const & i,
    NodeID const & j ) [pure virtual]
```



**Parameters**

|          |                           |
|----------|---------------------------|
| <i>i</i> | Index of the source node. |
| <i>j</i> | Index of the end node.    |

**Returns**

The directed similarity between *i* and *j*.

**9.69.4.2 getDiscDist()**

```
template<typename Network , typename DistType , typename NbHopsType >
double LinkPred::NetSimlCalculator< Network, DistType, NbHopsType >::getDiscDist ( ) const
[inline]
```

**Returns**

The distance assigned to disconnected nodes.

**9.69.4.3 getDiscNbHops()**

```
template<typename Network , typename DistType , typename NbHopsType >
std::size_t LinkPred::NetSimlCalculator< Network, DistType, NbHopsType >::getDiscNbHops ( )
const [inline]
```

**Returns**

The value that should be assigned as number of hops between disconnected nodes.

**9.69.4.4 getLambda()**

```
template<typename Network , typename DistType , typename NbHopsType >
double LinkPred::NetSimlCalculator< Network, DistType, NbHopsType >::getLambda ( ) const
[inline]
```

**Returns**

The conductance.

**9.69.4.5 getNnzSimlMap()**

```
template<typename Network , typename DistType , typename NbHopsType >
virtual NodeSDisMapSP LinkPred::NetSimlCalculator< Network, DistType, NbHopsType >::getNnzSimlMap (
    NodeID const & srcNode ) [inline], [virtual]
```

**Returns**

A sparse similarity map of nodes having non-zero similarity to a given source node. Only nodes not connected to *srcNode* are considered.

## Parameters

|                |                  |
|----------------|------------------|
| <i>srcNode</i> | The source node. |
|----------------|------------------|

**9.69.4.6 getNnzSimlMapNoNeighb()**

```
template<typename Network , typename DistType , typename NbHopsType >
virtual NodeSDistMapSP LinkPred::NetSimlCalculator< Network, DistType, NbHopsType >::getNnzSimlMapNoNeighb (
    NodeID const & srcNode ) [inline], [virtual]
```

## Returns

A sparse similarity map of nodes having non-zero similarity to a given source node. Only nodes not connected to *srcNode* are considered. The node *srcNode* itself is also excluded.

## Parameters

|                |                  |
|----------------|------------------|
| <i>srcNode</i> | The source node. |
|----------------|------------------|

**9.69.4.7 getSelfSiml()**

```
template<typename Network , typename DistType , typename NbHopsType >
double LinkPred::NetSimlCalculator< Network, DistType, NbHopsType >::getSelfSiml ( ) const
[inline]
```

## Returns

The similarity between a node and itself.

**9.69.4.8 getSiml()**

```
template<typename Network , typename DistType , typename NbHopsType >
virtual std::tuple<DistType, DistType, NbHopsType> LinkPred::NetSimlCalculator< Network,
DistType, NbHopsType >::getSiml (
    NodeID const & i,
    NodeID const & j ) [pure virtual]
```

## Parameters

|          |                           |
|----------|---------------------------|
| <i>i</i> | Index of the source node. |
| <i>j</i> | Index of the end node.    |

### Returns

The similarity between i and j.

#### 9.69.4.9 setDiscDist()

```
template<typename Network , typename DistType , typename NbHopsType >
void LinkPred::NetSimlCalculator< Network, DistType, NbHopsType >::setDiscDist (
    DistType discDist ) [inline]
```

Set the distance assigned to disconnected nodes.

### Parameters

|                 |                                              |
|-----------------|----------------------------------------------|
| <i>discDist</i> | The distance assigned to disconnected nodes. |
|-----------------|----------------------------------------------|

#### 9.69.4.10 setDiscNbHops()

```
template<typename Network , typename DistType , typename NbHopsType >
void LinkPred::NetSimlCalculator< Network, DistType, NbHopsType >::setDiscNbHops (
    NbHopsType discNbHops ) [inline]
```

Set the value that should be assigned as number of hops between disconnected nodes.

### Parameters

|                   |                                                                                 |
|-------------------|---------------------------------------------------------------------------------|
| <i>discNbHops</i> | The value that should be assigned as number of hops between disconnected nodes. |
|-------------------|---------------------------------------------------------------------------------|

#### 9.69.4.11 setLambda()

```
template<typename Network , typename DistType , typename NbHopsType >
void LinkPred::NetSimlCalculator< Network, DistType, NbHopsType >::setLambda (
    double lambda ) [inline]
```

Set the conductance.

### Parameters

|               |                                   |
|---------------|-----------------------------------|
| <i>lambda</i> | The new value of the conductance. |
|---------------|-----------------------------------|

#### 9.69.4.12 setSelfSiml()

```
template<typename Network , typename DistType , typename NbHopsType >
void LinkPred::NetSimlCalculator< Network, DistType, NbHopsType >::setSelfSiml (
    DistType selfSiml ) [inline]
```

Set the similarity between a node and itself.

##### Parameters

|                 |                                                      |
|-----------------|------------------------------------------------------|
| <i>selfSiml</i> | The similarity similarity between a node and itself. |
|-----------------|------------------------------------------------------|

The documentation for this class was generated from the following file:

- include/linkpred/graphalg/shortestpaths/netdistcalculator.hpp

## 9.70 LinkPred::NetworkManipulator< Network > Class Template Reference

Class to manipulate network by removing or adding edges.

```
#include <networkmanipulator.hpp>
```

### Public Types

- using [NetworkSP](#) = std::shared\_ptr< Network >
- using [NetworkCSP](#) = std::shared\_ptr< const Network >
- using [NodeID](#) = typename Network::NodeID
- using [Label](#) = typename Network::Label
- using [Edge](#) = typename Network::Edge
- template<typename ValueT >
 using [NodeMap](#) = typename Network::template [NodeMap](#)< ValueT >
- template<typename ValueT >
 using [EdgeMap](#) = typename Network::template [EdgeMap](#)< ValueT >

### Public Member Functions

- [NetworkManipulator](#) ()=default
- virtual [~NetworkManipulator](#) ()=default

## Static Public Member Functions

- `template<typename InserterIt >`  
static void `rst` (`NetworkCSP` net, long int seed, InserterIt inserter)
- static `std::pair< NetworkCSP, std::shared_ptr< std::vector< Edge > > >` `rndConExtract` (`NetworkCSP` net, double ratio, long int seed)
- static `std::pair< NetworkCSP, std::shared_ptr< std::vector< Edge > > >` `rndExtract` (`NetworkCSP` net, double ratio, long int seed)
- `template<typename InserterIt >`  
static void `getAllNegLinksExcept` (`NetworkCSP` net, `std::set< Edge >` const &excepts, InserterIt inserter)
- `template<typename InserterIt >`  
static void `getRndNegLinksExcept` (`NetworkCSP` net, double ratio, long int seed, `std::set< Edge >` const &excepts, InserterIt inserter)
- `template<typename InserterIt >`  
static void `getRndPosLinksExcept` (`NetworkCSP` net, double ratio, long int seed, `std::set< Edge >` const &excepts, InserterIt inserter)
- static `TestData< Network, std::vector< Edge > >` `createTestDataRem` (`NetworkCSP` refNet, double remRatio, bool keepConnected, bool aTP, double tpRatio, bool aTN, double tnRatio, long int seed, bool preGenerateTPN=true)
- static `TestData< Network, std::vector< Edge > >` `createTestDataRem` (`NetworkCSP` refNet, double remRatio, long int seed, bool preGenerateTPN=true)
- static `TestData< Network, std::vector< Edge > >` `createTestDataAdd` (`NetworkCSP` refNet, double addRatio, bool aTP, double tpRatio, bool aTN, double tnRatio, long int seed, bool preGenerateTPN=true)
- static `TestData< Network, std::vector< Edge > >` `createTestDataAdd` (`NetworkCSP` refNet, double addRatio, long int seed, bool preGenerateTPN=true)
- static `TestData< Network, std::vector< Edge > >` `createTestData` (`NetworkCSP` refNet, double remRatio, double addRatio, bool keepConnected, bool aTP, double tpRatio, bool aTN, double tnRatio, `LinkClass` posClass, `LinkClass` negClass, long int seed, bool preGenerateTPN=true)
- static `TestData< Network, std::vector< Edge > >` `createTestData` (`NetworkCSP` refNet, double remRatio, double addRatio, `LinkClass` posClass, `LinkClass` negClass, long int seed, bool preGenerateTPN=true)
- static `TestData< Network, std::vector< Edge > >` `createTestDataSeqInter` (`NetworkCSP` firstNet, `NetworkCSP` secondNet, bool aTP, double tpRatio, bool aTN, double tnRatio, `LinkClass` posClass, `LinkClass` negClass, long int seed, bool preGenerateTPN=true)
- static `TestData< Network, std::vector< Edge > >` `createTestDataSeq` (`NetworkCSP` firstNet, `NetworkCSP` secondNet, bool aTP, double tpRatio, bool aTN, double tnRatio, `LinkClass` posClass, `LinkClass` negClass, long int seed, bool preGenerateTPN=true)
- static `TestData< Network, std::vector< Edge > >` `loadTestData` (std::string obsEdgesFileName, std::string remEdgesFileName, std::string addEdgesFileName, bool aTP, double tpRatio, bool aTN, double tnRatio, `LinkClass` posClass, `LinkClass` negClass, long int seed, bool preGenerateTPN=true)
- static `TestData< Network, std::vector< Edge > >` `loadTestDataRem` (std::string obsEdgesFileName, std::string remEdgesFileName, bool preGenerateTPN=true)
- static `TestData< Network, std::vector< Edge > >` `loadTestDataAdd` (std::string obsEdgesFileName, std::string addEdgesFileName, bool preGenerateTPN=true)
- static bool `isConnected` (`NetworkCSP` net)

### 9.70.1 Detailed Description

```
template<typename Network = UNetwork<>>
class LinkPred::NetworkManipulator< Network >
```

Class to manipulate network by removing or adding edges.

The following terminology is used: When removing links: TP: Edges of observed network TN: Non-edges of reference network FP: None FN: Removed links When adding links: TP: Edges of reference network TN: Non-edges of observed network FP: Added links FN: None When adding/removing links: TP: Edges of observed network - added links = Edges of reference network - removed links TN: Non-edges of observed network - removed links = Non-edges of reference network - added links FP: Added links FN: Removed links

## Template Parameters

|                |                   |
|----------------|-------------------|
| <i>Network</i> | The network type. |
|----------------|-------------------|

## 9.70.2 Member Typedef Documentation

### 9.70.2.1 Edge

```
template<typename Network = UNetwork<>>
using LinkPred::NetworkManipulator< Network >::Edge = typename Network::Edge
```

The edge type.

### 9.70.2.2 EdgeMap

```
template<typename Network = UNetwork<>>
template<typename ValueT >
using LinkPred::NetworkManipulator< Network >::EdgeMap = typename Network::template EdgeMap<ValueT>
```

Edge map.

### 9.70.2.3 Label

```
template<typename Network = UNetwork<>>
using LinkPred::NetworkManipulator< Network >::Label = typename Network::Label
```

Nodes labels type.

### 9.70.2.4 NetworkCSP

```
template<typename Network = UNetwork<>>
using LinkPred::NetworkManipulator< Network >::NetworkCSP = std::shared_ptr<const Network>
```

Constant shared pointer to a network.

### 9.70.2.5 NetworkSP

```
template<typename Network = UNetwork<>>
using LinkPred::NetworkManipulator< Network >::NetworkSP = std::shared_ptr<Network>
```

Shared pointer to a network.

### 9.70.2.6 NodeID

```
template<typename Network = UNetwork<>>
using LinkPred::NetworkManipulator< Network >::NodeID = typename Network::NodeID
```

Nodes IDs type.

### 9.70.2.7 NodeMap

```
template<typename Network = UNetwork<>>
template<typename ValueT >
using LinkPred::NetworkManipulator< Network >::NodeMap = typename Network::template NodeMap<ValueT>
```

Node map.

## 9.70.3 Constructor & Destructor Documentation

### 9.70.3.1 NetworkManipulator()

```
template<typename Network = UNetwork<>>
LinkPred::NetworkManipulator< Network >::NetworkManipulator ( ) [default]
```

Constructor.

### 9.70.3.2 ~NetworkManipulator()

```
template<typename Network = UNetwork<>>
virtual LinkPred::NetworkManipulator< Network >::~~NetworkManipulator ( ) [virtual], [default]
```

Destructor.

## 9.70.4 Member Function Documentation

### 9.70.4.1 createTestData() [1/2]

```
template<typename Network = UNetwork<>>
static TestData<Network, std::vector<Edge>> > LinkPred::NetworkManipulator< Network >::create←
TestData (
    NetworkCSP refNet,
    double remRatio,
    double addRatio,
    bool keepConnected,
    bool aTP,
    double tpRatio,
    bool aTN,
    double tnRatio,
    LinkClass posClass,
    LinkClass negClass,
    long int seed,
    bool preGenerateTPN = true ) [static]
```

Creates test data by adding/removing edges from a network. The reference network is not modified. The two networks have the same external-internal ID mapping.

## Parameters

|                       |                                                                                                            |
|-----------------------|------------------------------------------------------------------------------------------------------------|
| <i>refNet</i>         | The reference network.                                                                                     |
| <i>remRatio</i>       | Value between 0 and 1 that specifies the percentage of edges that are removed.                             |
| <i>addRatio</i>       | Value between 0 and 1 that specifies the percentage of edges that are added.                               |
| <i>keepConnected</i>  | Whether to keep the network connected.                                                                     |
| <i>aTP</i>            | Whether to use all true positive links in the test set.                                                    |
| <i>tpRatio</i>        | Ratio of true positive links to e used in the test set. This parameter is only relevant when aTP is false. |
| <i>aTN</i>            | Whether to use all true negative links in the test set.                                                    |
| <i>tnRatio</i>        | Ratio of true negative links to e used in the test set. This parameter is only relevant when aTN is false. |
| <i>posClass</i>       | Indicates which links will be considered the positive links.                                               |
| <i>negClass</i>       | Indicates which links will be considered the negative links.                                               |
| <i>seed</i>           | The random number generator's seed.                                                                        |
| <i>preGenerateTPN</i> | Whether to pre-generate true positives and true negatives.                                                 |

## Returns

The test data.

## 9.70.4.2 createTestData() [2/2]

```
template<typename Network = UNetwork<>>
static TestData<Network, std::vector<Edge>> > LinkPred::NetworkManipulator< Network >::create←
TestData (
    NetworkCSP refNet,
    double remRatio,
    double addRatio,
    LinkClass posClass,
    LinkClass negClass,
    long int seed,
    bool preGenerateTPN = true ) [static]
```

Creates test data by adding/removing edges from a network. The reference network is not modified. The two networks have the same external-internal ID mapping.

## Parameters

|                       |                                                                                |
|-----------------------|--------------------------------------------------------------------------------|
| <i>refNet</i>         | The reference network.                                                         |
| <i>remRatio</i>       | Value between 0 and 1 that specifies the percentage of edges that are removed. |
| <i>addRatio</i>       | Value between 0 and 1 that specifies the percentage of edges that are added.   |
| <i>posClass</i>       | Indicates which links will be considered the positive links.                   |
| <i>negClass</i>       | Indicates which links will be considered the negative links.                   |
| <i>seed</i>           | The random number generator's seed.                                            |
| <i>preGenerateTPN</i> | Whether to pre-generate true positives and true negatives.                     |



**Returns**

The test data.

**9.70.4.3 createTestDataAdd() [1/2]**

```
template<typename Network = UNetwork<>>
static TestData<Network, std::vector<Edge> > LinkPred::NetworkManipulator< Network >::create←
TestDataAdd (
    NetworkCSP refNet,
    double addRatio,
    bool aTP,
    double tpRatio,
    bool aTN,
    double tnRatio,
    long int seed,
    bool preGenerateTPN = true ) [static]
```

Creates test data by adding edges to a network. The reference network is not modified. The two networks have the same external-internal ID mapping.

**Parameters**

|                       |                                                                                                           |
|-----------------------|-----------------------------------------------------------------------------------------------------------|
| <i>refNet</i>         | The reference network.                                                                                    |
| <i>addRatio</i>       | Value between 0 and 1 that specifies the percentage of edges that are added.                              |
| <i>aTP</i>            | Whether to use all true positive links in the test set.                                                   |
| <i>tpRatio</i>        | Ratio of true positive inks to e used in the test set. This parameter is only relevant when aTP is false. |
| <i>aTN</i>            | Whether to use all true negative links in the test set.                                                   |
| <i>tnRatio</i>        | Ratio of true negative inks to e used in the test set. This parameter is only relevant when aTN is false. |
| <i>seed</i>           | The random number generator's seed.                                                                       |
| <i>preGenerateTPN</i> | Whether to pre-generate true positives and true negatives.                                                |

**Returns**

The test data.

**9.70.4.4 createTestDataAdd() [2/2]**

```
template<typename Network = UNetwork<>>
static TestData<Network, std::vector<Edge> > LinkPred::NetworkManipulator< Network >::create←
TestDataAdd (
    NetworkCSP refNet,
    double addRatio,
    long int seed,
    bool preGenerateTPN = true ) [static]
```

Creates test data by adding edges to a network. The reference network is not modified. The two networks have the same external-internal ID mapping.

## Parameters

|                       |                                                                              |
|-----------------------|------------------------------------------------------------------------------|
| <i>refNet</i>         | The reference network.                                                       |
| <i>addRatio</i>       | Value between 0 and 1 that specifies the percentage of edges that are added. |
| <i>seed</i>           | The random number generator's seed.                                          |
| <i>preGenerateTPN</i> | Whether to pre-generate true positives and true negatives.                   |

## Returns

The test data.

## 9.70.4.5 createTestDataRem() [1/2]

```
template<typename Network = UNetwork<>>
static TestData<Network, std::vector<Edge> > LinkPred::NetworkManipulator< Network >::create←
TestDataRem (
    NetworkCSP refNet,
    double remRatio,
    bool keepConnected,
    bool aTP,
    double tpRatio,
    bool aTN,
    double tnRatio,
    long int seed,
    bool preGenerateTPN = true ) [static]
```

Creates test data by removing edges from a network. The reference network is not modified. The two networks have the same external-internal ID mapping.

## Parameters

|                       |                                                                                                           |
|-----------------------|-----------------------------------------------------------------------------------------------------------|
| <i>refNet</i>         | The reference network.                                                                                    |
| <i>remRatio</i>       | Value between 0 and 1 that specifies the percentage of edges that are removed.                            |
| <i>keepConnected</i>  | Whether to keep the network connected.                                                                    |
| <i>aTP</i>            | Whether to use all true positive links in the test set.                                                   |
| <i>tpRatio</i>        | Ratio of true positive inks to e used in the test set. This parameter is only relevant when aTP is false. |
| <i>aTN</i>            | Whether to use all true negative links in the test set.                                                   |
| <i>tnRatio</i>        | Ratio of true negative inks to e used in the test set. This parameter is only relevant when aTN is false. |
| <i>seed</i>           | The random number generator's seed.                                                                       |
| <i>preGenerateTPN</i> | Whether to pre-generate true positives and true negatives.                                                |

## Returns

The test data.

**9.70.4.6 createTestDataRem() [2/2]**

```
template<typename Network = UNetwork<>>
static TestData<Network, std::vector<Edge> > LinkPred::NetworkManipulator< Network >::create←
TestDataRem (
    NetworkCSP refNet,
    double remRatio,
    long int seed,
    bool preGenerateTPN = true ) [static]
```

Creates test data by removing edges from a network. The reference network is not modified. The two networks have the same external-internal ID mapping.

**Parameters**

|                       |                                                                                |
|-----------------------|--------------------------------------------------------------------------------|
| <i>refNet</i>         | The reference network.                                                         |
| <i>remRatio</i>       | Value between 0 and 1 that specifies the percentage of edges that are removed. |
| <i>seed</i>           | The random number generator's seed.                                            |
| <i>preGenerateTPN</i> | Whether to pre-generate true positives and true negatives.                     |

**Returns**

The test data.

**9.70.4.7 createTestDataSeq()**

```
template<typename Network = UNetwork<>>
static TestData<Network, std::vector<Edge> > LinkPred::NetworkManipulator< Network >::create←
TestDataSeq (
    NetworkCSP firstNet,
    NetworkCSP secondNet,
    bool aTP,
    double tpRatio,
    bool aTN,
    double tnRatio,
    LinkClass posClass,
    LinkClass negClass,
    long int seed,
    bool preGenerateTPN = true ) [static]
```

Creates test data from two networks. Nodes not present in the second network and associated edges are removed from the test set.

**Parameters**

|                  |                                                                                                            |
|------------------|------------------------------------------------------------------------------------------------------------|
| <i>firstNet</i>  | The first network.                                                                                         |
| <i>secondNet</i> | The second network.                                                                                        |
| <i>aTP</i>       | Whether to use all true positive links in the test set.                                                    |
| <i>tpRatio</i>   | Ratio of true positive links to e used in the test set. This parameter is only relevant when aTP is false. |
| <i>aTN</i>       | Whether to use all true negative links in the test set.                                                    |

## Parameters

|                       |                                                                                                           |
|-----------------------|-----------------------------------------------------------------------------------------------------------|
| <i>tnRatio</i>        | Ratio of true negative inks to e used in the test set. This parameter is only relevant when aTN is false. |
| <i>posClass</i>       | Indicates which links will be considered the positive links.                                              |
| <i>negClass</i>       | Indicates which links will be considered the negative links.                                              |
| <i>seed</i>           | The random number generator's seed.                                                                       |
| <i>preGenerateTPN</i> | Whether to pre-generate true positives and true negatives.                                                |

## Returns

The test data.

## 9.70.4.8 createTestDataSeqInter()

```
template<typename Network = UNetwork<>>
static TestData<Network, std::vector<Edge> > LinkPred::NetworkManipulator< Network >::create←
TestDataSeqInter (
    NetworkCSP firstNet,
    NetworkCSP secondNet,
    bool aTP,
    double tpRatio,
    bool aTN,
    double tnRatio,
    LinkClass posClass,
    LinkClass negClass,
    long int seed,
    bool preGenerateTPN = true ) [static]
```

Creates test data from two networks. Only nodes common to both networks are considered.

## Parameters

|                       |                                                                                                           |
|-----------------------|-----------------------------------------------------------------------------------------------------------|
| <i>firstNet</i>       | The first network.                                                                                        |
| <i>secondNet</i>      | The second network.                                                                                       |
| <i>aTP</i>            | Whether to use all true positive links in the test set.                                                   |
| <i>tpRatio</i>        | Ratio of true positive inks to e used in the test set. This parameter is only relevant when aTP is false. |
| <i>aTN</i>            | Whether to use all true negative links in the test set.                                                   |
| <i>tnRatio</i>        | Ratio of true negative inks to e used in the test set. This parameter is only relevant when aTN is false. |
| <i>posClass</i>       | Indicates which links will be considered the positive links.                                              |
| <i>negClass</i>       | Indicates which links will be considered the negative links.                                              |
| <i>seed</i>           | The random number generator's seed.                                                                       |
| <i>preGenerateTPN</i> | Whether to pre-generate true positives and true negatives.                                                |

## Returns

The test data.

#### 9.70.4.9 getAllNegLinksExcept()

```
template<typename Network = UNetwork<>>
template<typename InserterIt >
static void LinkPred::NetworkManipulator< Network >::getAllNegLinksExcept (
    NetworkCSP net,
    std::set< Edge > const & excepts,
    InserterIt inserter ) [inline], [static]
```

Return all negative links except those passed in parameter. Be aware that this can be computationally intensive both in term of time and space.

##### Parameters

|                 |                              |
|-----------------|------------------------------|
| <i>net</i>      | The network.                 |
| <i>excepts</i>  | The links that are excepted. |
| <i>inserter</i> | An inserter iterator.        |

#### 9.70.4.10 getRndNegLinksExcept()

```
template<typename Network = UNetwork<>>
template<typename InserterIt >
static void LinkPred::NetworkManipulator< Network >::getRndNegLinksExcept (
    NetworkCSP net,
    double ratio,
    long int seed,
    std::set< Edge > const & excepts,
    InserterIt inserter ) [inline], [static]
```

Select random negative links except those passed in parameter.

##### Parameters

|                 |                                                                  |
|-----------------|------------------------------------------------------------------|
| <i>net</i>      | The network.                                                     |
| <i>ratio</i>    | The ratio of negative links to be selected.                      |
| <i>seed</i>     | The random seed.                                                 |
| <i>excepts</i>  | The links that are excepted.                                     |
| <i>inserter</i> | The inserter iterator where the selected edges will be inserted. |

#### 9.70.4.11 getRndPosLinksExcept()

```
template<typename Network = UNetwork<>>
template<typename InserterIt >
```

```
static void LinkPred::NetworkManipulator< Network >::getRndPosLinksExcept (
    NetworkCSP net,
    double ratio,
    long int seed,
    std::set< Edge > const & excepts,
    InserterIt inserter ) [inline], [static]
```

Select random negative links except those passed in parameter.

#### Parameters

|                 |                                                                  |
|-----------------|------------------------------------------------------------------|
| <i>net</i>      | The network.                                                     |
| <i>ratio</i>    | The ratio of positive links to be selected.                      |
| <i>seed</i>     | The random seed.                                                 |
| <i>excepts</i>  | The links that are excepted.                                     |
| <i>inserter</i> | The inserter iterator where the selected edges will be inserted. |

#### 9.70.4.12 isConnected()

```
template<typename Network = UNetwork<>>
static bool LinkPred::NetworkManipulator< Network >::isConnected (
    NetworkCSP net ) [inline], [static]
```

Check if a network is connected.

#### Parameters

|            |              |
|------------|--------------|
| <i>net</i> | The network. |
|------------|--------------|

#### Returns

True if the network net is connected, false otherwise.

#### 9.70.4.13 loadTestData()

```
template<typename Network = UNetwork<>>
static TestData<Network, std::vector<Edge> > LinkPred::NetworkManipulator< Network >::load↵
TestData (
    std::string obsEdgesFileName,
    std::string remEdgesFileName,
    std::string addEdgesFileName,
    bool aTP,
    double tpRatio,
    bool aTN,
    double tnRatio,
    LinkClass posClass,
    LinkClass negClass,
```

```
long int seed,  
bool preGenerateTPN = true ) [static]
```

Read test data from file.

## Parameters

|                         |                                                                                                           |
|-------------------------|-----------------------------------------------------------------------------------------------------------|
| <i>obsEdgesFileName</i> | A file containing the observed edges (edge list format).                                                  |
| <i>remEdgesFileName</i> | A file containing the removed edges (edge list format). This is ignored if equal to empty string "".      |
| <i>addEdgesFileName</i> | A file containing the add edges (edge list format). This is ignored if equal to empty string "".          |
| <i>aTP</i>              | Whether to use all true positive links in the test set.                                                   |
| <i>tpRatio</i>          | Ratio of true positive inks to e used in the test set. This parameter is only relevant when aTP is false. |
| <i>aTN</i>              | Whether to use all true negative links in the test set.                                                   |
| <i>tnRatio</i>          | Ratio of true negative inks to e used in the test set. This parameter is only relevant when aTN is false. |
| <i>posClass</i>         | Indicates which links will be considered the positive links.                                              |
| <i>negClass</i>         | Indicates which links will be considered the negative links.                                              |
| <i>seed</i>             | The random number generator's seed.                                                                       |
| <i>preGenerateTPN</i>   | Whether to pre-generate true positives and true negatives.                                                |

## Returns

The test data.

## 9.70.4.14 loadTestDataAdd()

```
template<typename Network = UNetwork<>>
static TestData<Network, std::vector<Edge> > LinkPred::NetworkManipulator< Network >::load←
TestDataAdd (
    std::string obsEdgesFileName,
    std::string addEdgesFileName,
    bool preGenerateTPN = true ) [static]
```

Read test data from file (test data obtained by adding edges).

## Parameters

|                         |                                                            |
|-------------------------|------------------------------------------------------------|
| <i>obsEdgesFileName</i> | A file containing the observed edges (edge list format).   |
| <i>addEdgesFileName</i> | A file containing the added edges (edge list format).      |
| <i>preGenerateTPN</i>   | Whether to pre-generate true positives and true negatives. |

## Returns

The test data.

## 9.70.4.15 loadTestDataRem()

```
template<typename Network = UNetwork<>>
static TestData<Network, std::vector<Edge> > LinkPred::NetworkManipulator< Network >::load←
```



```
TestDataRem (
    std::string obsEdgesFileName,
    std::string remEdgesFileName,
    bool preGenerateTPN = true ) [static]
```

Read test data from file (test data obtained by removing edges).

#### Parameters

|                         |                                                            |
|-------------------------|------------------------------------------------------------|
| <i>obsEdgesFileName</i> | A file containing the observed edges (edge list format).   |
| <i>remEdgesFileName</i> | A file containing the removed edges (edge list format).    |
| <i>preGenerateTPN</i>   | Whether to pre-generate true positives and true negatives. |

#### Returns

The test data.

#### 9.70.4.16 rndConExtract()

```
template<typename Network = UNetwork<>>
static std::pair<NetworkCSP, std::shared_ptr<std::vector<Edge>>> > LinkPred::NetworkManipulator<
Network >::rndConExtract (
    NetworkCSP net,
    double ratio,
    long int seed ) [static]
```

Creates a new connected network from the current by extracting uniformly randomly a specified ratio of edges. The reference network is not modified. The two networks have the same external-internal ID mapping.

#### Parameters

|              |                                                                                |
|--------------|--------------------------------------------------------------------------------|
| <i>net</i>   | The reference network.                                                         |
| <i>ratio</i> | Value between 0 and 1 that specifies the percentage of edges that are removed. |
| <i>seed</i>  | The random number generator's seed.                                            |

#### Returns

A pair that contains a pointer to the resulting network and pointer to the set of extracted links.

#### 9.70.4.17 rndExtract()

```
template<typename Network = UNetwork<>>
static std::pair<NetworkCSP, std::shared_ptr<std::vector<Edge>>> > LinkPred::NetworkManipulator<
Network >::rndExtract (
    NetworkCSP net,
```

```
double ratio,
long int seed ) [static]
```

Creates a new network from the current by extracting uniformly randomly a specified ratio of edges. The reference network is not modified. The two networks have the same external-internal ID mapping.

#### Parameters

|              |                                                                                |
|--------------|--------------------------------------------------------------------------------|
| <i>net</i>   | The reference network.                                                         |
| <i>ratio</i> | Value between 0 and 1 that specifies the percentage of edges that are removed. |
| <i>seed</i>  | The random number generator's seed.                                            |

#### Returns

A pair that contains a pointer to the resulting network and pointer to the set of extracted links.

#### 9.70.4.18 rst()

```
template<typename Network = UNetwork<>>
template<typename InserterIt >
static void LinkPred::NetworkManipulator< Network >::rst (
    NetworkCSP net,
    long int seed,
    InserterIt inserter ) [inline], [static]
```

Generate a random spanning tree.

#### Template Parameters

|                   |                                        |
|-------------------|----------------------------------------|
| <i>InserterIt</i> | Type of iterator to insert tree edges. |
|-------------------|----------------------------------------|

#### Parameters

|                 |                                                |
|-----------------|------------------------------------------------|
| <i>net</i>      | The network.                                   |
| <i>seed</i>     | The random number generator's seed.            |
| <i>inserter</i> | An inserter iterator to insert the tree edges. |

The documentation for this class was generated from the following file:

- include/linkpred/perf/[networkmanipulator.hpp](#)

## 9.71 LinkPred::Node2Vec< Network > Class Template Reference

[Node2Vec](#) encoder. References: Grover, A. and Leskovec, J. (2016). Node2vec: Scalable feature learning for networks. In Proceedings of the 22nd ACM SIGKDD International Conference on Knowledge Discovery and Data

Mining, KDD'16, pages 855–864, New York, NY, USA. Association for Computing Machinery. This implementation is based on the code <https://github.com/xgfs/node2vec-c>.

```
#include <node2vec.hpp>
```

Inheritance diagram for LinkPred::Node2Vec< Network >:

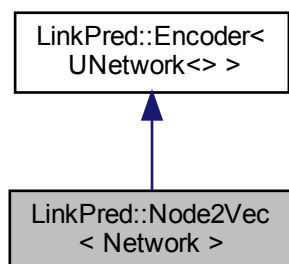

Collaboration diagram for LinkPred::Node2Vec< Network >:

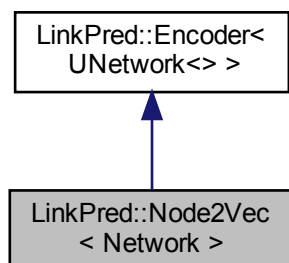

## Public Member Functions

- [Node2Vec](#) (std::shared\_ptr< Network const > net, long int seed)
- [Node2Vec](#) ([Node2Vec](#) const &that)=default
- [Node2Vec](#) & [operator=](#) ([Node2Vec](#) const &that)=default
- [Node2Vec](#) ([Node2Vec](#) &&that)=default
- [Node2Vec](#) & [operator=](#) ([Node2Vec](#) &&that)=default
- virtual void [init](#) ()
- virtual void [encode](#) ()
- float [getInitLR](#) () const
- void [setInitLR](#) (float initLR)
- int [getNbNegSamples](#) () const
- void [setNbNegSamples](#) (int nbNegSamples)

- int [getNbWalks](#) () const
- void [setNbWalks](#) (int nbWalks)
- float [getP](#) () const
- void [setP](#) (float p)
- float [getQ](#) () const
- void [setQ](#) (float q)
- int [getWalkLength](#) () const
- void [setWalkLength](#) (int walkLength)
- int [getWindowSize](#) () const
- void [setWindowSize](#) (int windowSize)
- virtual void [setWeightMap](#) (const [WeightMapSP](#) &weightMap)
- long long [getStepInterval](#) () const
- void [setStepInterval](#) (long long stepInterval)
- long long [getTotalSteps](#) () const
- const int [getDefaultDim](#) () const
- float [getSubSample](#) () const
- void [setSubSample](#) (float subSample)
- virtual [~Node2Vec](#) ()=default

## Additional Inherited Members

### 9.71.1 Detailed Description

```
template<typename Network = UNetwork<>>
class LinkPred::Node2Vec< Network >
```

[Node2Vec](#) encoder. References: Grover, A. and Leskovec, J. (2016). Node2vec: Scalable feature learning for networks. In Proceedings of the 22nd ACM SIGKDD International Conference on Knowledge Discovery and Data Mining, KDD'16, pages 855–864, New York, NY, USA. Association for Computing Machinery. This implementation is based on the code <https://github.com/xgfs/node2vec-c>.

#### Template Parameters

|                |                   |
|----------------|-------------------|
| <i>Network</i> | The network type. |
|----------------|-------------------|

### 9.71.2 Constructor & Destructor Documentation

#### 9.71.2.1 Node2Vec() [1/3]

```
template<typename Network = UNetwork<>>
LinkPred::Node2Vec< Network >::Node2Vec (
    std::shared_ptr< Network const > net,
    long int seed ) [inline]
```

Constructor.

## Parameters

|             |                               |
|-------------|-------------------------------|
| <i>net</i>  | The network.                  |
| <i>seed</i> | Random number generator seed. |

**9.71.2.2 Node2Vec()** [2/3]

```
template<typename Network = UNetwork<>>
LinkPred::Node2Vec< Network >::Node2Vec (
    Node2Vec< Network > const & that ) [default]
```

Copy constructor.

## Parameters

|             |                     |
|-------------|---------------------|
| <i>that</i> | The object to copy. |
|-------------|---------------------|

**9.71.2.3 Node2Vec()** [3/3]

```
template<typename Network = UNetwork<>>
LinkPred::Node2Vec< Network >::Node2Vec (
    Node2Vec< Network > && that ) [default]
```

Move constructor.

## Parameters

|             |                     |
|-------------|---------------------|
| <i>that</i> | The object to move. |
|-------------|---------------------|

**9.71.2.4 ~Node2Vec()**

```
template<typename Network = UNetwork<>>
virtual LinkPred::Node2Vec< Network >::~~Node2Vec ( ) [virtual], [default]
```

Destructor.

**9.71.3 Member Function Documentation**

### 9.71.3.1 encode()

```
template<typename Network = UNetwork<>>
virtual void LinkPred::Node2Vec< Network >::encode ( ) [virtual]
```

Encode the network.

Implements [LinkPred::Encoder< UNetwork<> >](#).

### 9.71.3.2 getDefaultDim()

```
template<typename Network = UNetwork<>>
const int LinkPred::Node2Vec< Network >::getDefaultDim ( ) const [inline]
```

#### Returns

Default embedding dimension.

### 9.71.3.3 getInitLR()

```
template<typename Network = UNetwork<>>
float LinkPred::Node2Vec< Network >::getInitLR ( ) const [inline]
```

#### Returns

Initial learning rate.

### 9.71.3.4 getNbNegSamples()

```
template<typename Network = UNetwork<>>
int LinkPred::Node2Vec< Network >::getNbNegSamples ( ) const [inline]
```

#### Returns

Number of negative samples.

### 9.71.3.5 getNbWalks()

```
template<typename Network = UNetwork<>>
int LinkPred::Node2Vec< Network >::getNbWalks ( ) const [inline]
```

#### Returns

Number of walks per vertex ("gamma").

### 9.71.3.6 getP()

```
template<typename Network = UNetwork<>>
float LinkPred::Node2Vec< Network >::getP ( ) const [inline]
```

#### Returns

The parameter p.

### 9.71.3.7 getQ()

```
template<typename Network = UNetwork<>>
float LinkPred::Node2Vec< Network >::getQ ( ) const [inline]
```

#### Returns

The parameter q.

### 9.71.3.8 getStepInterval()

```
template<typename Network = UNetwork<>>
long long LinkPred::Node2Vec< Network >::getStepInterval ( ) const [inline]
```

#### Returns

The number of steps after which the learning rate is updated.

**9.71.3.9 getSubSample()**

```
template<typename Network = UNetwork<>>
float LinkPred::Node2Vec< Network >::getSubSample ( ) const [inline]
```

**Returns**

Sub-sample size.

**9.71.3.10 getTotalSteps()**

```
template<typename Network = UNetwork<>>
long long LinkPred::Node2Vec< Network >::getTotalSteps ( ) const [inline]
```

**Returns**

The total number of steps.

**9.71.3.11 getWalkLength()**

```
template<typename Network = UNetwork<>>
int LinkPred::Node2Vec< Network >::getWalkLength ( ) const [inline]
```

**Returns**

[DeepWalk](#) parameter "t" = length of the walk.

**9.71.3.12 getWindowSize()**

```
template<typename Network = UNetwork<>>
int LinkPred::Node2Vec< Network >::getWindowSize ( ) const [inline]
```

**Returns**

[DeepWalk](#) parameter "w" = window size.

**9.71.3.13 init()**

```
template<typename Network = UNetwork<>>
virtual void LinkPred::Node2Vec< Network >::init ( ) [virtual]
```

Initialize encoder.

Implements [LinkPred::Encoder< UNetwork<>>](#) .

**9.71.3.14 operator=() [1/2]**

```
template<typename Network = UNetwork<>>
Node2Vec& LinkPred::Node2Vec< Network >::operator= (
    Node2Vec< Network > && that ) [default]
```

Move assignment operator.



## Parameters

|             |                     |
|-------------|---------------------|
| <i>that</i> | The object to move. |
|-------------|---------------------|

**9.71.3.15 operator=()** [2/2]

```
template<typename Network = UNetwork<>>
Node2Vec& LinkPred::Node2Vec< Network >::operator= (
    Node2Vec< Network > const & that ) [default]
```

Copy assignment operator.

## Parameters

|             |                     |
|-------------|---------------------|
| <i>that</i> | The object to copy. |
|-------------|---------------------|

**9.71.3.16 setInitLR()**

```
template<typename Network = UNetwork<>>
void LinkPred::Node2Vec< Network >::setInitLR (
    float initLR ) [inline]
```

Set the initial learning rate.

## Parameters

|               |                        |
|---------------|------------------------|
| <i>initLR</i> | Initial learning rate. |
|---------------|------------------------|

**9.71.3.17 setNbNegSamples()**

```
template<typename Network = UNetwork<>>
void LinkPred::Node2Vec< Network >::setNbNegSamples (
    int nbNegSamples ) [inline]
```

Set the number of negative samples.

## Parameters

|                     |                                 |
|---------------------|---------------------------------|
| <i>nbNegSamples</i> | The number of negative samples. |
|---------------------|---------------------------------|

**9.71.3.18 setNbWalks()**

```
template<typename Network = UNetwork<>>
void LinkPred::Node2Vec< Network >::setNbWalks (
    int nbWalks ) [inline]
```

Set the number of walks per vertex (" $\gamma$ ").

**Parameters**

|                |                                            |
|----------------|--------------------------------------------|
| <i>nbWalks</i> | Number of walks per vertex (" $\gamma$ "). |
|----------------|--------------------------------------------|

**9.71.3.19 setP()**

```
template<typename Network = UNetwork<>>
void LinkPred::Node2Vec< Network >::setP (
    float p ) [inline]
```

Set the parameter  $p$ .

**Parameters**

|     |                     |
|-----|---------------------|
| $p$ | The parameter $p$ . |
|-----|---------------------|

**9.71.3.20 setQ()**

```
template<typename Network = UNetwork<>>
void LinkPred::Node2Vec< Network >::setQ (
    float q ) [inline]
```

Set the parameter  $q$ .

**Parameters**

|     |                     |
|-----|---------------------|
| $q$ | The parameter $q$ . |
|-----|---------------------|

**9.71.3.21 setStepInterval()**

```
template<typename Network = UNetwork<>>
void LinkPred::Node2Vec< Network >::setStepInterval (
    long long stepInterval ) [inline]
```

Set the number of steps after which the learning rate is updated.

## Parameters

|                     |                                                           |
|---------------------|-----------------------------------------------------------|
| <i>stepInterval</i> | Number of steps after which the learning rate is updated. |
|---------------------|-----------------------------------------------------------|

**9.71.3.22 setSubSample()**

```
template<typename Network = UNetwork<>>
void LinkPred::Node2Vec< Network >::setSubSample (
    float subSample ) [inline]
```

Set sub-sample size.

## Parameters

|                  |                  |
|------------------|------------------|
| <i>subSample</i> | Sub-sample size. |
|------------------|------------------|

**9.71.3.23 setWalkLength()**

```
template<typename Network = UNetwork<>>
void LinkPred::Node2Vec< Network >::setWalkLength (
    int walkLength ) [inline]
```

Set the [DeepWalk](#) parameter "t" = length of the walk.

## Parameters

|                   |                                                              |
|-------------------|--------------------------------------------------------------|
| <i>walkLength</i> | <a href="#">DeepWalk</a> parameter "t" = length of the walk. |
|-------------------|--------------------------------------------------------------|

**9.71.3.24 setWeightMap()**

```
template<typename Network = UNetwork<>>
virtual void LinkPred::Node2Vec< Network >::setWeightMap (
    const WeightMapSP & weightMap ) [inline], [virtual]
```

Set edge weight map.

Reimplemented from [LinkPred::Encoder< UNetwork<> >](#).

### 9.71.3.25 setWindowSize()

```
template<typename Network = UNetwork<>>
void LinkPred::Node2Vec< Network >::setWindowSize (
    int windowSize ) [inline]
```

Set the [DeepWalk](#) parameter "w" = window size.

#### Parameters

|                   |                                                       |
|-------------------|-------------------------------------------------------|
| <i>windowSize</i> | <a href="#">DeepWalk</a> parameter "w" = window size. |
|-------------------|-------------------------------------------------------|

The documentation for this class was generated from the following file:

- [include/linkpred/graphalg/encoders/node2vec/node2vec.hpp](#)

## 9.72 LinkPred::DNetwork< LabelT, NodeIDT, EdgeT >::NodeDegIt Class Reference

Node-degree iterator. This class can be used to iterate over pairs of node IDs and in and out degrees.

```
#include <dnetwork.hpp>
```

Inheritance diagram for LinkPred::DNetwork< LabelT, NodeIDT, EdgeT >::NodeDegIt:

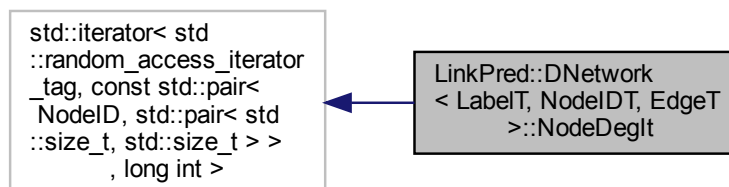

Collaboration diagram for LinkPred::DNetwork< LabelT, NodeIDT, EdgeT >::NodeDegIt:

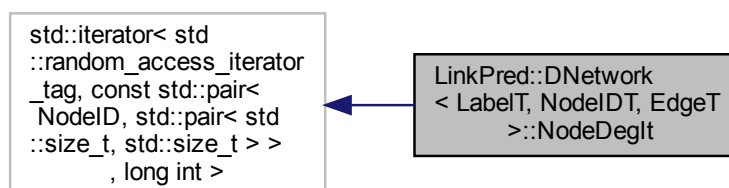

## Public Types

- using [pointer](#) = typename std::iterator< std::random\_access\_iterator\_tag, const std::pair< [NodeID](#), std::pair< std::size\_t, std::size\_t >, long int >::[pointer](#)
- using [reference](#) = typename std::iterator< std::random\_access\_iterator\_tag, const std::pair< [NodeID](#), std::pair< std::size\_t, std::size\_t >, long int >::[reference](#)
- using [difference\\_type](#) = typename std::iterator< std::random\_access\_iterator\_tag, const std::pair< [NodeID](#), std::pair< std::size\_t, std::size\_t >, long int >::[difference\\_type](#)

## Public Member Functions

- [NodeDegIt](#) ([NodeDegIt](#) const &that)=default
- [NodeDegIt](#) & [operator=](#) ([NodeDegIt](#) const &that)=default
- [NodeDegIt](#) ([NodeDegIt](#) &&that)=default
- [NodeDegIt](#) & [operator=](#) ([NodeDegIt](#) &&that)=default
- [reference operator\\*](#) ()
- [pointer operator->](#) ()
- [NodeDegIt](#) & [operator++](#) ()
- [NodeDegIt](#) & [operator--](#) ()
- [NodeDegIt](#) [operator++](#) (int)
- [NodeDegIt](#) [operator--](#) (int)
- [NodeDegIt](#) [operator+](#) (const [difference\\_type](#) &n) const
- [NodeDegIt](#) & [operator+=](#) (const [difference\\_type](#) &n)
- [NodeDegIt](#) [operator-](#) (const [difference\\_type](#) &n) const
- [NodeDegIt](#) & [operator-=](#) (const [difference\\_type](#) &n)
- [difference\\_type operator-](#) (const [NodeDegIt](#) &that) const
- bool [operator==](#) (const [NodeDegIt](#) &that) const
- bool [operator!=](#) (const [NodeDegIt](#) &that) const
- bool [operator<](#) (const [NodeDegIt](#) &that) const
- bool [operator>](#) (const [NodeDegIt](#) &that) const
- bool [operator<=](#) (const [NodeDegIt](#) &that) const
- bool [operator>=](#) (const [NodeDegIt](#) &that) const

## Friends

- class [DNetwork](#)

### 9.72.1 Detailed Description

```
template<typename LabelT = std::string, typename NodeIDT = unsigned int, typename EdgeT = unsigned long long int>
class LinkPred::DNetwork< LabelT, NodeIDT, EdgeT >::NodeDegIt
```

Node-degree iterator. This class can be used to iterate over pairs of node IDs and in and out degrees.

### 9.72.2 Member Typedef Documentation

### 9.72.2.1 difference\_type

```
template<typename LabelT = std::string, typename NodeIDT = unsigned int, typename EdgeT =
unsigned long long int>
using LinkPred::DNetwork< LabelT, NodeIDT, EdgeT >::NodeDegIt::difference_type = typename
std::iterator<std::random_access_iterator_tag, const std::pair<NodeID, std::pair<std::size_t,
std::size_t> >, long int>::difference_type
```

The difference type associated with the iterator.

### 9.72.2.2 pointer

```
template<typename LabelT = std::string, typename NodeIDT = unsigned int, typename EdgeT =
unsigned long long int>
using LinkPred::DNetwork< LabelT, NodeIDT, EdgeT >::NodeDegIt::pointer = typename std::iterator<std::
random_access_iterator_tag, const std::pair<NodeID, std::pair<std::size_t, std::size_t> >,
long int>::pointer
```

The pointer type associated with the iterator.

### 9.72.2.3 reference

```
template<typename LabelT = std::string, typename NodeIDT = unsigned int, typename EdgeT =
unsigned long long int>
using LinkPred::DNetwork< LabelT, NodeIDT, EdgeT >::NodeDegIt::reference = typename std::
iterator<std::random_access_iterator_tag, const std::pair<NodeID, std::pair<std::size_t,
std::size_t> >, long int>::reference
```

The reference type associated with the iterator.

## 9.72.3 Constructor & Destructor Documentation

### 9.72.3.1 NodeDegIt() [1/2]

```
template<typename LabelT = std::string, typename NodeIDT = unsigned int, typename EdgeT =
unsigned long long int>
LinkPred::DNetwork< LabelT, NodeIDT, EdgeT >::NodeDegIt::NodeDegIt (
    NodeDegIt const & that ) [default]
```

Copy constructor.

#### Parameters

|             |                     |
|-------------|---------------------|
| <i>that</i> | The object to copy. |
|-------------|---------------------|

### 9.72.3.2 NodeDegIt() [2/2]

```
template<typename LabelT = std::string, typename NodeIDT = unsigned int, typename EdgeT =
unsigned long long int>
LinkPred::DNetwork< LabelT, NodeIDT, EdgeT >::NodeDegIt::NodeDegIt (
    NodeDegIt && that ) [default]
```

Move constructor.

#### Parameters

|             |                     |
|-------------|---------------------|
| <i>that</i> | The object to move. |
|-------------|---------------------|

## 9.72.4 Member Function Documentation

### 9.72.4.1 operator!=(())

```
template<typename LabelT = std::string, typename NodeIDT = unsigned int, typename EdgeT =
unsigned long long int>
bool LinkPred::DNetwork< LabelT, NodeIDT, EdgeT >::NodeDegIt::operator!= (
    const NodeDegIt & that ) const [inline]
```

#### Parameters

|             |                     |
|-------------|---------------------|
| <i>that</i> | The other iterator. |
|-------------|---------------------|

#### Returns

True if this is not equal to that.

### 9.72.4.2 operator\*()

```
template<typename LabelT = std::string, typename NodeIDT = unsigned int, typename EdgeT =
unsigned long long int>
reference LinkPred::DNetwork< LabelT, NodeIDT, EdgeT >::NodeDegIt::operator* ( ) [inline]
```

Dereference operator.

#### Returns

A reference to the object to which the iterator points.

### 9.72.4.3 operator+()

```
template<typename LabelT = std::string, typename NodeIDT = unsigned int, typename EdgeT =
unsigned long long int>
NodeDegIt LinkPred::DNetwork< LabelT, NodeIDT, EdgeT >::NodeDegIt::operator+ (
    const difference_type & n ) const [inline]
```

Arithmetic + operator.

#### Parameters

|          |                  |
|----------|------------------|
| <i>n</i> | Increment value. |
|----------|------------------|

#### Returns

The new iterator.

### 9.72.4.4 operator++() [1/2]

```
template<typename LabelT = std::string, typename NodeIDT = unsigned int, typename EdgeT =
unsigned long long int>
NodeDegIt& LinkPred::DNetwork< LabelT, NodeIDT, EdgeT >::NodeDegIt::operator++ ( ) [inline]
```

Pre-increment operator.

#### Returns

A reference to the new iterator.

### 9.72.4.5 operator++() [2/2]

```
template<typename LabelT = std::string, typename NodeIDT = unsigned int, typename EdgeT =
unsigned long long int>
NodeDegIt LinkPred::DNetwork< LabelT, NodeIDT, EdgeT >::NodeDegIt::operator++ (
    int ) [inline]
```

Post-increment operator.

#### Returns

A reference to the new iterator.

### 9.72.4.6 operator+=()

```
template<typename LabelT = std::string, typename NodeIDT = unsigned int, typename EdgeT =
unsigned long long int>
NodeDegIt& LinkPred::DNetwork< LabelT, NodeIDT, EdgeT >::NodeDegIt::operator+= (
    const difference_type & n ) [inline]
```

Arithmetic += operator.



## Parameters

|          |                  |
|----------|------------------|
| <i>n</i> | Increment value. |
|----------|------------------|

## Returns

A reference to the new iterator.

**9.72.4.7 operator-() [1/2]**

```
template<typename LabelT = std::string, typename NodeIDT = unsigned int, typename EdgeT =
unsigned long long int>
NodeDegIt LinkPred::DNetwork< LabelT, NodeIDT, EdgeT >::NodeDegIt::operator- (
    const difference_type & n ) const [inline]
```

Arithmetic - operator.

## Parameters

|          |                  |
|----------|------------------|
| <i>n</i> | Decrement value. |
|----------|------------------|

## Returns

The new iterator.

**9.72.4.8 operator-() [2/2]**

```
template<typename LabelT = std::string, typename NodeIDT = unsigned int, typename EdgeT =
unsigned long long int>
difference_type LinkPred::DNetwork< LabelT, NodeIDT, EdgeT >::NodeDegIt::operator- (
    const NodeDegIt & that ) const [inline]
```

Difference between the present iterator and the one passed as parameter.

## Parameters

|             |                     |
|-------------|---------------------|
| <i>that</i> | The other iterator. |
|-------------|---------------------|

## Returns

The difference between the current and that iterator.

**9.72.4.9 operator--() [1/2]**

```
template<typename LabelT = std::string, typename NodeIDT = unsigned int, typename EdgeT =
unsigned long long int>
NodeDegIt& LinkPred::DNetwork< LabelT, NodeIDT, EdgeT >::NodeDegIt::operator-- ( ) [inline]
```

Pre-decrement operator.

**Returns**

A reference to the new iterator.

**9.72.4.10 operator--() [2/2]**

```
template<typename LabelT = std::string, typename NodeIDT = unsigned int, typename EdgeT =
unsigned long long int>
NodeDegIt LinkPred::DNetwork< LabelT, NodeIDT, EdgeT >::NodeDegIt::operator-- (
    int ) [inline]
```

Post-decrement operator.

**Returns**

A reference to the new iterator.

**9.72.4.11 operator-=( )**

```
template<typename LabelT = std::string, typename NodeIDT = unsigned int, typename EdgeT =
unsigned long long int>
NodeDegIt& LinkPred::DNetwork< LabelT, NodeIDT, EdgeT >::NodeDegIt::operator-= (
    const difference_type & n ) [inline]
```

Arithmetic -= operator.

**Parameters**

|          |                  |
|----------|------------------|
| <i>n</i> | Decrement value. |
|----------|------------------|

**Returns**

A reference to the new iterator.

#### 9.72.4.12 operator->()

```
template<typename LabelT = std::string, typename NodeIDT = unsigned int, typename EdgeT =
unsigned long long int>
pointer LinkPred::DNetwork< LabelT, NodeIDT, EdgeT >::NodeDegIt::operator-> ( ) [inline]
```

Arrow operator.

##### Returns

A pointer to the object to which the iterator points.

#### 9.72.4.13 operator<()

```
template<typename LabelT = std::string, typename NodeIDT = unsigned int, typename EdgeT =
unsigned long long int>
bool LinkPred::DNetwork< LabelT, NodeIDT, EdgeT >::NodeDegIt::operator< (
    const NodeDegIt & that ) const [inline]
```

##### Parameters

|             |                     |
|-------------|---------------------|
| <i>that</i> | The other iterator. |
|-------------|---------------------|

##### Returns

True if this is less than that.

#### 9.72.4.14 operator<=()

```
template<typename LabelT = std::string, typename NodeIDT = unsigned int, typename EdgeT =
unsigned long long int>
bool LinkPred::DNetwork< LabelT, NodeIDT, EdgeT >::NodeDegIt::operator<= (
    const NodeDegIt & that ) const [inline]
```

##### Parameters

|             |                     |
|-------------|---------------------|
| <i>that</i> | The other iterator. |
|-------------|---------------------|

##### Returns

True if this is greater or equal to that.

#### 9.72.4.15 operator=() [1/2]

```
template<typename LabelT = std::string, typename NodeIDT = unsigned int, typename EdgeT =
unsigned long long int>
NodeDegIt& LinkPred::DNetwork< LabelT, NodeIDT, EdgeT >::NodeDegIt::operator= (
    NodeDegIt && that ) [default]
```

Move assignment operator.

##### Parameters

|             |                     |
|-------------|---------------------|
| <i>that</i> | The object to move. |
|-------------|---------------------|

#### 9.72.4.16 operator=() [2/2]

```
template<typename LabelT = std::string, typename NodeIDT = unsigned int, typename EdgeT =
unsigned long long int>
NodeDegIt& LinkPred::DNetwork< LabelT, NodeIDT, EdgeT >::NodeDegIt::operator= (
    NodeDegIt const & that ) [default]
```

Copy assignment operator.

##### Parameters

|             |                     |
|-------------|---------------------|
| <i>that</i> | The object to copy. |
|-------------|---------------------|

#### 9.72.4.17 operator==( )

```
template<typename LabelT = std::string, typename NodeIDT = unsigned int, typename EdgeT =
unsigned long long int>
bool LinkPred::DNetwork< LabelT, NodeIDT, EdgeT >::NodeDegIt::operator== (
    const NodeDegIt & that ) const [inline]
```

##### Parameters

|             |                     |
|-------------|---------------------|
| <i>that</i> | The other iterator. |
|-------------|---------------------|

##### Returns

True if this equals that.

#### 9.72.4.18 operator>()

```
template<typename LabelT = std::string, typename NodeIDT = unsigned int, typename EdgeT =
unsigned long long int>
bool LinkPred::DNetwork< LabelT, NodeIDT, EdgeT >::NodeDegIt::operator> (
    const NodeDegIt & that ) const [inline]
```

##### Parameters

|             |                     |
|-------------|---------------------|
| <i>that</i> | The other iterator. |
|-------------|---------------------|

##### Returns

True if this is greater than that.

#### 9.72.4.19 operator>=()

```
template<typename LabelT = std::string, typename NodeIDT = unsigned int, typename EdgeT =
unsigned long long int>
bool LinkPred::DNetwork< LabelT, NodeIDT, EdgeT >::NodeDegIt::operator>= (
    const NodeDegIt & that ) const [inline]
```

##### Parameters

|             |                     |
|-------------|---------------------|
| <i>that</i> | The other iterator. |
|-------------|---------------------|

##### Returns

True if this is less or equal to that.

### 9.72.5 Friends And Related Function Documentation

#### 9.72.5.1 DNetwork

```
template<typename LabelT = std::string, typename NodeIDT = unsigned int, typename EdgeT =
unsigned long long int>
friend class DNetwork [friend]
```

[DNetwork](#) is a friend.

The documentation for this class was generated from the following file:

- [include/linkpred/core/dnetwork/dnetwork.hpp](#)

## 9.73 LinkPred::UNetwork< LabelT, NodeIDT, EdgeT >::NodeDegIt Class Reference

Node-degree iterator. This class can be used to iterate over pairs of node IDs and degrees.

```
#include <unetwork.hpp>
```

Inheritance diagram for LinkPred::UNetwork< LabelT, NodeIDT, EdgeT >::NodeDegIt:

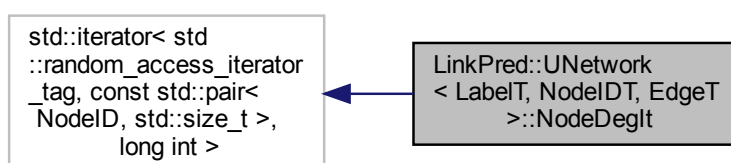

Collaboration diagram for LinkPred::UNetwork< LabelT, NodeIDT, EdgeT >::NodeDegIt:

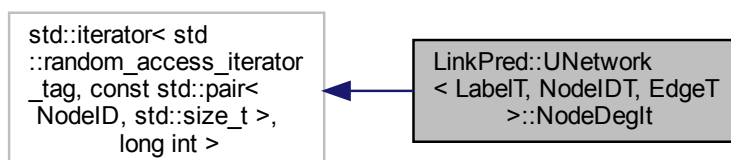

### Public Types

- using [pointer](#) = typename std::iterator< std::random\_access\_iterator\_tag, const std::pair< [NodeID](#), std::size\_t >, long int >::pointer
- using [reference](#) = typename std::iterator< std::random\_access\_iterator\_tag, const std::pair< [NodeID](#), std::size\_t >, long int >::reference
- using [difference\\_type](#) = typename std::iterator< std::random\_access\_iterator\_tag, const std::pair< [NodeID](#), std::size\_t >, long int >::difference\_type

### Public Member Functions

- [NodeDegIt](#) ([NodeDegIt](#) const &that)=default
- [NodeDegIt](#) & operator= ([NodeDegIt](#) const &that)=default
- [NodeDegIt](#) ([NodeDegIt](#) &&that)=default
- [NodeDegIt](#) & operator= ([NodeDegIt](#) &&that)=default

- [reference operator\\*](#) ()
- [pointer operator->](#) ()
- [NodeDegIt & operator++](#) ()
- [NodeDegIt & operator--](#) ()
- [NodeDegIt operator++](#) (int)
- [NodeDegIt operator--](#) (int)
- [NodeDegIt operator+](#) (const [difference\\_type](#) &n) const
- [NodeDegIt & operator+=](#) (const [difference\\_type](#) &n)
- [NodeDegIt operator-](#) (const [difference\\_type](#) &n) const
- [NodeDegIt & operator-=](#) (const [difference\\_type](#) &n)
- [difference\\_type operator-](#) (const [NodeDegIt](#) &that) const
- [bool operator==](#) (const [NodeDegIt](#) &that) const
- [bool operator!=](#) (const [NodeDegIt](#) &that) const
- [bool operator<](#) (const [NodeDegIt](#) &that) const
- [bool operator>](#) (const [NodeDegIt](#) &that) const
- [bool operator<=](#) (const [NodeDegIt](#) &that) const
- [bool operator>=](#) (const [NodeDegIt](#) &that) const

## Friends

- class [UNetwork](#)

## 9.73.1 Detailed Description

```
template<typename LabelT = std::string, typename NodeIDT = unsigned int, typename EdgeT = unsigned long long int>
class LinkPred::UNetwork< LabelT, NodeIDT, EdgeT >::NodeDegIt
```

Node-degree iterator. This class can be used to iterate over pairs of node IDs and degrees.

## 9.73.2 Member Typedef Documentation

### 9.73.2.1 difference\_type

```
template<typename LabelT = std::string, typename NodeIDT = unsigned int, typename EdgeT =
unsigned long long int>
using LinkPred::UNetwork< LabelT, NodeIDT, EdgeT >::NodeDegIt::difference_type = typename
std::iterator<std::random_access_iterator_tag, const std::pair<NodeID, std::size_t>, long
int>::difference_type
```

The difference type associated with the iterator.

### 9.73.2.2 pointer

```
template<typename LabelT = std::string, typename NodeIDT = unsigned int, typename EdgeT =
unsigned long long int>
using LinkPred::UNetwork< LabelT, NodeIDT, EdgeT >::NodeDegIt::pointer = typename std::iterator<std::random_access_iterator_tag, const std::pair<NodeID, std::size_t>, long int>::pointer
```

The pointer type associated with the iterator.

### 9.73.2.3 reference

```
template<typename LabelT = std::string, typename NodeIDT = unsigned int, typename EdgeT =
unsigned long long int>
using LinkPred::UNetwork< LabelT, NodeIDT, EdgeT >::NodeDegIt::reference = typename std::
::iterator<std::random_access_iterator_tag, const std::pair<NodeID, std::size_t>, long int>::
::reference
```

The reference type associated with the iterator.

## 9.73.3 Constructor & Destructor Documentation

### 9.73.3.1 NodeDegIt() [1/2]

```
template<typename LabelT = std::string, typename NodeIDT = unsigned int, typename EdgeT =
unsigned long long int>
LinkPred::UNetwork< LabelT, NodeIDT, EdgeT >::NodeDegIt::NodeDegIt (
    NodeDegIt const & that ) [default]
```

Copy constructor.

#### Parameters

|             |                     |
|-------------|---------------------|
| <i>that</i> | The object to copy. |
|-------------|---------------------|

### 9.73.3.2 NodeDegIt() [2/2]

```
template<typename LabelT = std::string, typename NodeIDT = unsigned int, typename EdgeT =
unsigned long long int>
LinkPred::UNetwork< LabelT, NodeIDT, EdgeT >::NodeDegIt::NodeDegIt (
    NodeDegIt && that ) [default]
```

Move constructor.

#### Parameters

|             |                     |
|-------------|---------------------|
| <i>that</i> | The object to move. |
|-------------|---------------------|

## 9.73.4 Member Function Documentation



#### 9.73.4.1 operator"!="()

```
template<typename LabelT = std::string, typename NodeIDT = unsigned int, typename EdgeT =
unsigned long long int>
bool LinkPred::UNetwork< LabelT, NodeIDT, EdgeT >::NodeDegIt::operator!= (
    const NodeDegIt & that ) const [inline]
```

##### Parameters

|             |                     |
|-------------|---------------------|
| <i>that</i> | The other iterator. |
|-------------|---------------------|

##### Returns

True if this is not equal to that.

#### 9.73.4.2 operator\*()

```
template<typename LabelT = std::string, typename NodeIDT = unsigned int, typename EdgeT =
unsigned long long int>
reference LinkPred::UNetwork< LabelT, NodeIDT, EdgeT >::NodeDegIt::operator* ( ) [inline]
```

Dereference operator.

##### Returns

A reference to the object to which the iterator points.

#### 9.73.4.3 operator+()

```
template<typename LabelT = std::string, typename NodeIDT = unsigned int, typename EdgeT =
unsigned long long int>
NodeDegIt LinkPred::UNetwork< LabelT, NodeIDT, EdgeT >::NodeDegIt::operator+ (
    const difference_type & n ) const [inline]
```

Arithmetic + operator.

##### Parameters

|          |                  |
|----------|------------------|
| <i>n</i> | Increment value. |
|----------|------------------|

##### Returns

The new iterator.

**9.73.4.4 operator++() [1/2]**

```
template<typename LabelT = std::string, typename NodeIDT = unsigned int, typename EdgeT =
unsigned long long int>
NodeDegIt& LinkPred::UNetwork< LabelT, NodeIDT, EdgeT >::NodeDegIt::operator++ ( ) [inline]
```

Pre-increment operator.

**Returns**

A reference to the new iterator.

**9.73.4.5 operator++() [2/2]**

```
template<typename LabelT = std::string, typename NodeIDT = unsigned int, typename EdgeT =
unsigned long long int>
NodeDegIt LinkPred::UNetwork< LabelT, NodeIDT, EdgeT >::NodeDegIt::operator++ (
    int ) [inline]
```

Post-increment operator.

**Returns**

A reference to the new iterator.

**9.73.4.6 operator+=( )**

```
template<typename LabelT = std::string, typename NodeIDT = unsigned int, typename EdgeT =
unsigned long long int>
NodeDegIt& LinkPred::UNetwork< LabelT, NodeIDT, EdgeT >::NodeDegIt::operator+=( (
    const difference_type & n ) [inline]
```

Arithmetic += operator.

**Parameters**

|          |                  |
|----------|------------------|
| <i>n</i> | Increment value. |
|----------|------------------|

**Returns**

A reference to the new iterator.

**9.73.4.7 operator-() [1/2]**

```
template<typename LabelT = std::string, typename NodeIDT = unsigned int, typename EdgeT =
unsigned long long int>
NodeDegIt LinkPred::UNetwork< LabelT, NodeIDT, EdgeT >::NodeDegIt::operator- (
    const difference_type & n ) const [inline]
```

Arithmetic - operator.

**Parameters**

|          |                  |
|----------|------------------|
| <i>n</i> | Decrement value. |
|----------|------------------|

**Returns**

The new iterator.

**9.73.4.8 operator-() [2/2]**

```
template<typename LabelT = std::string, typename NodeIDT = unsigned int, typename EdgeT =
unsigned long long int>
difference_type LinkPred::UNetwork< LabelT, NodeIDT, EdgeT >::NodeDegIt::operator- (
    const NodeDegIt & that ) const [inline]
```

Difference between the present iterator and the one passed as parameter.

**Parameters**

|             |                     |
|-------------|---------------------|
| <i>that</i> | The other iterator. |
|-------------|---------------------|

**Returns**

The difference between the current and that iterator.

**9.73.4.9 operator--() [1/2]**

```
template<typename LabelT = std::string, typename NodeIDT = unsigned int, typename EdgeT =
unsigned long long int>
NodeDegIt& LinkPred::UNetwork< LabelT, NodeIDT, EdgeT >::NodeDegIt::operator-- ( ) [inline]
```

Pre-decrement operator.

**Returns**

A reference to the new iterator.

**9.73.4.10 operator--()** [2/2]

```
template<typename LabelT = std::string, typename NodeIDT = unsigned int, typename EdgeT =
unsigned long long int>
NodeDegIt LinkPred::UNetwork< LabelT, NodeIDT, EdgeT >::NodeDegIt::operator-- (
    int ) [inline]
```

Post-decrement operator.

**Returns**

A reference to the new iterator.

**9.73.4.11 operator-=( )**

```
template<typename LabelT = std::string, typename NodeIDT = unsigned int, typename EdgeT =
unsigned long long int>
NodeDegIt & LinkPred::UNetwork< LabelT, NodeIDT, EdgeT >::NodeDegIt::operator-= (
    const difference_type & n ) [inline]
```

Arithmetic -= operator.

**Parameters**

|          |                  |
|----------|------------------|
| <i>n</i> | Decrement value. |
|----------|------------------|

**Returns**

A reference to the new iterator.

**9.73.4.12 operator->( )**

```
template<typename LabelT = std::string, typename NodeIDT = unsigned int, typename EdgeT =
unsigned long long int>
pointer LinkPred::UNetwork< LabelT, NodeIDT, EdgeT >::NodeDegIt::operator-> ( ) [inline]
```

Arrow operator.

**Returns**

A pointer to the object to which the iterator points.

**9.73.4.13 operator<( )**

```
template<typename LabelT = std::string, typename NodeIDT = unsigned int, typename EdgeT =
unsigned long long int>
bool LinkPred::UNetwork< LabelT, NodeIDT, EdgeT >::NodeDegIt::operator< (
    const NodeDegIt & that ) const [inline]
```

## Parameters

|             |                     |
|-------------|---------------------|
| <i>that</i> | The other iterator. |
|-------------|---------------------|

## Returns

True if this is less than that.

**9.73.4.14 operator<=()**

```
template<typename LabelT = std::string, typename NodeIDT = unsigned int, typename EdgeT =
unsigned long long int>
bool LinkPred::UNetwork< LabelT, NodeIDT, EdgeT >::NodeDegIt::operator<= (
    const NodeDegIt & that ) const [inline]
```

## Parameters

|             |                     |
|-------------|---------------------|
| <i>that</i> | The other iterator. |
|-------------|---------------------|

## Returns

True if this is greater or equal to that.

**9.73.4.15 operator=() [1/2]**

```
template<typename LabelT = std::string, typename NodeIDT = unsigned int, typename EdgeT =
unsigned long long int>
NodeDegIt& LinkPred::UNetwork< LabelT, NodeIDT, EdgeT >::NodeDegIt::operator= (
    NodeDegIt && that ) [default]
```

Move assignment operator.

## Parameters

|             |                     |
|-------------|---------------------|
| <i>that</i> | The object to move. |
|-------------|---------------------|

**9.73.4.16 operator=() [2/2]**

```
template<typename LabelT = std::string, typename NodeIDT = unsigned int, typename EdgeT =
unsigned long long int>
```

```
NodeDegIt& LinkPred::UNetwork< LabelT, NodeIDT, EdgeT >::NodeDegIt::operator= (  
    NodeDegIt const & that ) [default]
```

Copy assignment operator.

## Parameters

|             |                     |
|-------------|---------------------|
| <i>that</i> | The object to copy. |
|-------------|---------------------|

**9.73.4.17 operator==()**

```
template<typename LabelT = std::string, typename NodeIDT = unsigned int, typename EdgeT =
unsigned long long int>
bool LinkPred::UNetwork< LabelT, NodeIDT, EdgeT >::NodeDegIt::operator== (
    const NodeDegIt & that ) const [inline]
```

## Parameters

|             |                     |
|-------------|---------------------|
| <i>that</i> | The other iterator. |
|-------------|---------------------|

## Returns

True if this equals that.

**9.73.4.18 operator>()**

```
template<typename LabelT = std::string, typename NodeIDT = unsigned int, typename EdgeT =
unsigned long long int>
bool LinkPred::UNetwork< LabelT, NodeIDT, EdgeT >::NodeDegIt::operator> (
    const NodeDegIt & that ) const [inline]
```

## Parameters

|             |                     |
|-------------|---------------------|
| <i>that</i> | The other iterator. |
|-------------|---------------------|

## Returns

True if this is greater than that.

**9.73.4.19 operator>=()**

```
template<typename LabelT = std::string, typename NodeIDT = unsigned int, typename EdgeT =
unsigned long long int>
bool LinkPred::UNetwork< LabelT, NodeIDT, EdgeT >::NodeDegIt::operator>= (
    const NodeDegIt & that ) const [inline]
```

## Parameters

|             |                     |
|-------------|---------------------|
| <i>that</i> | The other iterator. |
|-------------|---------------------|

## Returns

True if this is less or equal to that.

## 9.73.5 Friends And Related Function Documentation

### 9.73.5.1 UNetwork

```
template<typename LabelT = std::string, typename NodeIDT = unsigned int, typename EdgeT =
unsigned long long int>
friend class UNetwork [friend]
```

UNetwork is a friend.

The documentation for this class was generated from the following file:

- include/linkpred/core/unetwork/unetwork.hpp

## 9.74 LinkPred::UNetwork< LabelT, NodeIDT, EdgeT >::NodeMap< ValueType > Class Template Reference

A node map.

```
#include <unetwork.hpp>
```

### Public Types

- using [NodeMapIt](#) = typename std::vector< ValueType >::iterator
- using [NodeMapConstIt](#) = typename std::vector< ValueType >::const\_iterator

### Public Member Functions

- [NodeMap](#) ([NodeMap](#) const &that)=default
- [NodeMap](#) & [operator=](#) ([NodeMap](#) const &that)=default
- [NodeMap](#) ([NodeMap](#) &&that)=default
- [NodeMap](#) & [operator=](#) ([NodeMap](#) &&that)=default
- ValueType [operator\[\]](#) ([NodeID](#) const &i) const
- ValueType & [operator\[\]](#) ([NodeID](#) const &i)
- ValueType [at](#) ([NodeID](#) const &i) const
- [NodeMapIt](#) [begin](#) ()
- [NodeMapIt](#) [end](#) ()
- [NodeMapConstIt](#) [cbegin](#) () const
- [NodeMapConstIt](#) [cend](#) () const
- [~NodeMap](#) ()=default



## Friends

- class **UNetwork**

### 9.74.1 Detailed Description

```
template<typename LabelT = std::string, typename NodeIDT = unsigned int, typename EdgeT = unsigned long long int>
template<typename ValueType>
class LinkPred::UNetwork< LabelT, NodeIDT, EdgeT >::NodeMap< ValueType >
```

A node map.

This class can be used to assign a value to every node in the network. Access to values is done in constant time.

#### Template Parameters

|                  |                        |
|------------------|------------------------|
| <i>ValueType</i> | Type of mapped values. |
|------------------|------------------------|

### 9.74.2 Member Typedef Documentation

#### 9.74.2.1 NodeMapConstIt

```
template<typename LabelT = std::string, typename NodeIDT = unsigned int, typename EdgeT =
unsigned long long int>
template<typename ValueType >
using LinkPred::UNetwork< LabelT, NodeIDT, EdgeT >::NodeMap< ValueType >::NodeMapConstIt =
typename std::vector<ValueType>::const_iterator
```

A constant iterator on the map values.

#### 9.74.2.2 NodeMapIt

```
template<typename LabelT = std::string, typename NodeIDT = unsigned int, typename EdgeT =
unsigned long long int>
template<typename ValueType >
using LinkPred::UNetwork< LabelT, NodeIDT, EdgeT >::NodeMap< ValueType >::NodeMapIt = typename
std::vector<ValueType>::iterator
```

Iterator on the map values.

### 9.74.3 Constructor & Destructor Documentation

### 9.74.3.1 NodeMap() [1/2]

```
template<typename LabelT = std::string, typename NodeIDT = unsigned int, typename EdgeT =
unsigned long long int>
template<typename ValueType >
LinkPred::UNetwork< LabelT, NodeIDT, EdgeT >::NodeMap< ValueType >::NodeMap (
    NodeMap< ValueType > const & that ) [default]
```

Copy constructor.

#### Parameters

|             |                     |
|-------------|---------------------|
| <i>that</i> | The object to copy. |
|-------------|---------------------|

### 9.74.3.2 NodeMap() [2/2]

```
template<typename LabelT = std::string, typename NodeIDT = unsigned int, typename EdgeT =
unsigned long long int>
template<typename ValueType >
LinkPred::UNetwork< LabelT, NodeIDT, EdgeT >::NodeMap< ValueType >::NodeMap (
    NodeMap< ValueType > && that ) [default]
```

Move constructor.

#### Parameters

|             |                     |
|-------------|---------------------|
| <i>that</i> | The object to move. |
|-------------|---------------------|

### 9.74.3.3 ~NodeMap()

```
template<typename LabelT = std::string, typename NodeIDT = unsigned int, typename EdgeT =
unsigned long long int>
template<typename ValueType >
LinkPred::UNetwork< LabelT, NodeIDT, EdgeT >::NodeMap< ValueType >::~NodeMap ( ) [default]
```

Destructor.

## 9.74.4 Member Function Documentation

### 9.74.4.1 at()

```
template<typename LabelT = std::string, typename NodeIDT = unsigned int, typename EdgeT =
unsigned long long int>
template<typename ValueType >
ValueType LinkPred::UNetwork< LabelT, NodeIDT, EdgeT >::NodeMap< ValueType >::at (
    NodeID const & i ) const [inline]
```

#### Parameters

|          |            |
|----------|------------|
| <i>i</i> | A node ID. |
|----------|------------|

#### Returns

The value associated with the node *i*.

#### 9.74.4.2 begin()

```
template<typename LabelT = std::string, typename NodeIDT = unsigned int, typename EdgeT =
unsigned long long int>
template<typename ValueType >
NodeMapIt LinkPred::UNetwork< LabelT, NodeIDT, EdgeT >::NodeMap< ValueType >::begin ( ) [inline]
```

#### Returns

An iterator to the first element in the map.

#### 9.74.4.3 cbegin()

```
template<typename LabelT = std::string, typename NodeIDT = unsigned int, typename EdgeT =
unsigned long long int>
template<typename ValueType >
NodeMapConstIt LinkPred::UNetwork< LabelT, NodeIDT, EdgeT >::NodeMap< ValueType >::cbegin ( )
const [inline]
```

#### Returns

A constant iterator to the first element in the map.

#### 9.74.4.4 cend()

```
template<typename LabelT = std::string, typename NodeIDT = unsigned int, typename EdgeT =
unsigned long long int>
template<typename ValueType >
NodeMapConstIt LinkPred::UNetwork< LabelT, NodeIDT, EdgeT >::NodeMap< ValueType >::cend ( )
const [inline]
```

#### Returns

A constant iterator to one-past-the-last element in the map.

#### 9.74.4.5 end()

```
template<typename LabelT = std::string, typename NodeIDT = unsigned int, typename EdgeT =
unsigned long long int>
template<typename ValueType >
NodeMapIt LinkPred::UNetwork< LabelT, NodeIDT, EdgeT >::NodeMap< ValueType >::end ( ) [inline]
```

##### Returns

An iterator to one-past-the-last element in the map.

#### 9.74.4.6 operator=() [1/2]

```
template<typename LabelT = std::string, typename NodeIDT = unsigned int, typename EdgeT =
unsigned long long int>
template<typename ValueType >
NodeMap& LinkPred::UNetwork< LabelT, NodeIDT, EdgeT >::NodeMap< ValueType >::operator= (
    NodeMap< ValueType > && that ) [default]
```

Move assignment operator.

##### Parameters

|             |                     |
|-------------|---------------------|
| <i>that</i> | The object to move. |
|-------------|---------------------|

#### 9.74.4.7 operator=() [2/2]

```
template<typename LabelT = std::string, typename NodeIDT = unsigned int, typename EdgeT =
unsigned long long int>
template<typename ValueType >
NodeMap& LinkPred::UNetwork< LabelT, NodeIDT, EdgeT >::NodeMap< ValueType >::operator= (
    NodeMap< ValueType > const & that ) [default]
```

Copy assignment operator.

##### Parameters

|             |                     |
|-------------|---------------------|
| <i>that</i> | The object to copy. |
|-------------|---------------------|

#### 9.74.4.8 operator[]() [1/2]

```
template<typename LabelT = std::string, typename NodeIDT = unsigned int, typename EdgeT =
unsigned long long int>
```

```
template<typename ValueType >
ValueType& LinkPred::UNetwork< LabelT, NodeIDT, EdgeT >::NodeMap< ValueType >::operator[] (
    NodeID const & i ) [inline]
```

**Parameters**

|          |            |
|----------|------------|
| <i>i</i> | A node ID. |
|----------|------------|

**Returns**

A reference to the value associated with the node *i*.

**9.74.4.9 operator[]() [2/2]**

```
template<typename LabelT = std::string, typename NodeIDT = unsigned int, typename EdgeT =
unsigned long long int>
template<typename ValueType >
ValueType LinkPred::UNetwork< LabelT, NodeIDT, EdgeT >::NodeMap< ValueType >::operator[] (
    NodeID const & i ) const [inline]
```

**Parameters**

|          |            |
|----------|------------|
| <i>i</i> | A node ID. |
|----------|------------|

**Returns**

The value associated with the node *i*.

The documentation for this class was generated from the following file:

- [include/linkpred/core/unetwork/unetwork.hpp](#)

## 9.75 LinkPred::DNetwork< LabelT, NodeIDT, EdgeT >::NodeMap< ValueType > Class Template Reference

A node map.

```
#include <dnetwork.hpp>
```

**Public Types**

- using [NodeMapIt](#) = typename std::vector< ValueType >::iterator
- using [NodeMapConstIt](#) = typename std::vector< ValueType >::const\_iterator

## Public Member Functions

- [NodeMap](#) ([NodeMap](#) const &that)=default
- [NodeMap](#) & [operator=](#) ([NodeMap](#) const &that)=default
- [NodeMap](#) ([NodeMap](#) &&that)=default
- [NodeMap](#) & [operator=](#) ([NodeMap](#) &&that)=default
- [ValueType](#) [operator\[\]](#) ([NodeID](#) const &i) const
- [ValueType](#) & [operator\[\]](#) ([NodeID](#) const &i)
- [ValueType](#) [at](#) ([NodeID](#) const &i) const
- [NodeMapIt](#) [begin](#) ()
- [NodeMapIt](#) [end](#) ()
- [NodeMapConstIt](#) [cbegin](#) () const
- [NodeMapConstIt](#) [cend](#) () const
- [~NodeMap](#) ()=default

## Friends

- class **DNetwork**

### 9.75.1 Detailed Description

```
template<typename LabelT = std::string, typename NodeIDT = unsigned int, typename EdgeT = unsigned long long int>
template<typename ValueType>
class LinkPred::DNetwork< LabelT, NodeIDT, EdgeT >::NodeMap< ValueType >
```

A node map.

This class can be used to assign a value to every node in the network. Access to values is done in constant time.

#### Template Parameters

|                  |                        |
|------------------|------------------------|
| <i>ValueType</i> | Type of mapped values. |
|------------------|------------------------|

### 9.75.2 Member Typedef Documentation

#### 9.75.2.1 NodeMapConstIt

```
template<typename LabelT = std::string, typename NodeIDT = unsigned int, typename EdgeT =
unsigned long long int>
template<typename ValueType>
using LinkPred::DNetwork< LabelT, NodeIDT, EdgeT >::NodeMap< ValueType >::NodeMapConstIt =
typename std::vector<ValueType>::const_iterator
```

A constant iterator on the map values.

### 9.75.2.2 NodeMapIt

```
template<typename LabelT = std::string, typename NodeIDT = unsigned int, typename EdgeT =
unsigned long long int>
template<typename ValueType >
using LinkPred::DNetwork< LabelT, NodeIDT, EdgeT >::NodeMap< ValueType >::NodeMapIt = typename
std::vector<ValueType>::iterator
```

Iterator on the map values.

## 9.75.3 Constructor & Destructor Documentation

### 9.75.3.1 NodeMap() [1/2]

```
template<typename LabelT = std::string, typename NodeIDT = unsigned int, typename EdgeT =
unsigned long long int>
template<typename ValueType >
LinkPred::DNetwork< LabelT, NodeIDT, EdgeT >::NodeMap< ValueType >::NodeMap (
    NodeMap< ValueType > const & that ) [default]
```

Copy constructor.

#### Parameters

|             |                     |
|-------------|---------------------|
| <i>that</i> | The object to copy. |
|-------------|---------------------|

### 9.75.3.2 NodeMap() [2/2]

```
template<typename LabelT = std::string, typename NodeIDT = unsigned int, typename EdgeT =
unsigned long long int>
template<typename ValueType >
LinkPred::DNetwork< LabelT, NodeIDT, EdgeT >::NodeMap< ValueType >::NodeMap (
    NodeMap< ValueType > && that ) [default]
```

Move constructor.

#### Parameters

|             |                     |
|-------------|---------------------|
| <i>that</i> | The object to move. |
|-------------|---------------------|

### 9.75.3.3 ~NodeMap()

```
template<typename LabelT = std::string, typename NodeIDT = unsigned int, typename EdgeT =
```

```

unsigned long long int>
template<typename ValueType >
LinkPred::DNetwork< LabelT, NodeIDT, EdgeT >::~NodeMap< ValueType >::~~NodeMap ( ) [default]

```

Destructor.

## 9.75.4 Member Function Documentation

### 9.75.4.1 at()

```

template<typename LabelT = std::string, typename NodeIDT = unsigned int, typename EdgeT =
unsigned long long int>
template<typename ValueType >
ValueType LinkPred::DNetwork< LabelT, NodeIDT, EdgeT >::~NodeMap< ValueType >::at (
    NodeID const & i ) const [inline]

```

#### Parameters

|          |            |
|----------|------------|
| <i>i</i> | A node ID. |
|----------|------------|

#### Returns

The value associated with the node *i*.

### 9.75.4.2 begin()

```

template<typename LabelT = std::string, typename NodeIDT = unsigned int, typename EdgeT =
unsigned long long int>
template<typename ValueType >
NodeMapIt LinkPred::DNetwork< LabelT, NodeIDT, EdgeT >::~NodeMap< ValueType >::begin ( ) [inline]

```

#### Returns

An iterator to the first element in the map.

### 9.75.4.3 cbegin()

```

template<typename LabelT = std::string, typename NodeIDT = unsigned int, typename EdgeT =
unsigned long long int>
template<typename ValueType >
NodeMapConstIt LinkPred::DNetwork< LabelT, NodeIDT, EdgeT >::~NodeMap< ValueType >::cbegin ( )
const [inline]

```

#### Returns

A constant iterator to the first element in the map.



#### 9.75.4.4 cend()

```
template<typename LabelT = std::string, typename NodeIDT = unsigned int, typename EdgeT =
unsigned long long int>
template<typename ValueType >
NodeMapConstIt LinkPred::DNetwork< LabelT, NodeIDT, EdgeT >::NodeMap< ValueType >::cend ( )
const [inline]
```

##### Returns

A constant iterator to one-past-the-last element in the map.

#### 9.75.4.5 end()

```
template<typename LabelT = std::string, typename NodeIDT = unsigned int, typename EdgeT =
unsigned long long int>
template<typename ValueType >
NodeMapIt LinkPred::DNetwork< LabelT, NodeIDT, EdgeT >::NodeMap< ValueType >::end ( ) [inline]
```

##### Returns

An iterator to one-past-the-last element in the map.

#### 9.75.4.6 operator=() [1/2]

```
template<typename LabelT = std::string, typename NodeIDT = unsigned int, typename EdgeT =
unsigned long long int>
template<typename ValueType >
NodeMap& LinkPred::DNetwork< LabelT, NodeIDT, EdgeT >::NodeMap< ValueType >::operator= (
NodeMap< ValueType > && that ) [default]
```

Move assignment operator.

##### Parameters

|             |                     |
|-------------|---------------------|
| <i>that</i> | The object to move. |
|-------------|---------------------|

#### 9.75.4.7 operator=() [2/2]

```
template<typename LabelT = std::string, typename NodeIDT = unsigned int, typename EdgeT =
unsigned long long int>
template<typename ValueType >
```

```
NodeMap& LinkPred::DNetwork< LabelT, NodeIDT, EdgeT >::NodeMap< ValueType >::operator= (
    NodeMap< ValueType > const & that ) [default]
```

Copy assignment operator.

#### Parameters

|             |                     |
|-------------|---------------------|
| <i>that</i> | The object to copy. |
|-------------|---------------------|

### 9.75.4.8 operator[]() [1/2]

```
template<typename LabelT = std::string, typename NodeIDT = unsigned int, typename EdgeT =
unsigned long long int>
template<typename ValueType >
ValueType& LinkPred::DNetwork< LabelT, NodeIDT, EdgeT >::NodeMap< ValueType >::operator[] (
    NodeID const & i ) [inline]
```

#### Parameters

|          |            |
|----------|------------|
| <i>i</i> | A node ID. |
|----------|------------|

#### Returns

A reference to the value associated with the node *i*.

### 9.75.4.9 operator[]() [2/2]

```
template<typename LabelT = std::string, typename NodeIDT = unsigned int, typename EdgeT =
unsigned long long int>
template<typename ValueType >
ValueType LinkPred::DNetwork< LabelT, NodeIDT, EdgeT >::NodeMap< ValueType >::operator[] (
    NodeID const & i ) const [inline]
```

#### Parameters

|          |            |
|----------|------------|
| <i>i</i> | A node ID. |
|----------|------------|

#### Returns

The value associated with the node *i*.

The documentation for this class was generated from the following file:

- [include/linkpred/core/dnetwork/dnetwork.hpp](#)

## 9.76 LinkPred::DNetwork< LabelT, NodeIDT, EdgeT >::NodeSMap< ValueType > Class Template Reference

A sparse node map.

```
#include <dnetwork.hpp>
```

### Public Types

- using [NodeSMapIterator](#) = typename std::map< [NodeID](#), ValueType >::iterator
- using [NodeSMapConstIterator](#) = typename std::map< [NodeID](#), ValueType >::const\_iterator

### Public Member Functions

- [NodeSMap](#) ([NodeSMap](#) const &that)=default
- [NodeSMap](#) & [operator=](#) ([NodeSMap](#) const &that)=default
- [NodeSMap](#) ([NodeSMap](#) &&that)=default
- [NodeSMap](#) & [operator=](#) ([NodeSMap](#) &&that)=default
- auto [find](#) ([NodeID](#) const &i)
- ValueType [operator\[\]](#) ([NodeID](#) const &i) const
- ValueType & [operator\[\]](#) ([NodeID](#) const &i)
- ValueType [at](#) ([NodeID](#) const &i) const
- [NodeSMapIterator](#) [begin](#) ()
- [NodeSMapIterator](#) [end](#) ()
- [NodeSMapConstIterator](#) [cbegin](#) () const
- [NodeSMapConstIterator](#) [cend](#) () const
- std::size\_t [size](#) () const
- [~NodeSMap](#) ()=default

### Friends

- class [DNetwork](#)

#### 9.76.1 Detailed Description

```
template<typename LabelT = std::string, typename NodeIDT = unsigned int, typename EdgeT = unsigned long long int>
template<typename ValueType>
class LinkPred::DNetwork< LabelT, NodeIDT, EdgeT >::NodeSMap< ValueType >
```

A sparse node map.

This class can be used to assign a value to every node in the network. Access to values is done in constant time.

#### Template Parameters

|                  |                        |
|------------------|------------------------|
| <i>ValueType</i> | Type of mapped values. |
|------------------|------------------------|

## 9.76.2 Member Typedef Documentation

### 9.76.2.1 NodeSMapConstIterator

```
template<typename LabelT = std::string, typename NodeIDT = unsigned int, typename EdgeT =
unsigned long long int>
template<typename ValueType >
using LinkPred::DNetwork< LabelT, NodeIDT, EdgeT >::NodeSMap< ValueType >::NodeSMapConstIterator
= typename std::map<NodeID, ValueType>::const_iterator
```

A constant iterator on the map values.

### 9.76.2.2 NodeSMapIterator

```
template<typename LabelT = std::string, typename NodeIDT = unsigned int, typename EdgeT =
unsigned long long int>
template<typename ValueType >
using LinkPred::DNetwork< LabelT, NodeIDT, EdgeT >::NodeSMap< ValueType >::NodeSMapIterator =
typename std::map<NodeID, ValueType>::iterator
```

Iterator on the map values.

## 9.76.3 Constructor & Destructor Documentation

### 9.76.3.1 NodeSMap() [1/2]

```
template<typename LabelT = std::string, typename NodeIDT = unsigned int, typename EdgeT =
unsigned long long int>
template<typename ValueType >
LinkPred::DNetwork< LabelT, NodeIDT, EdgeT >::NodeSMap< ValueType >::NodeSMap (
    NodeSMap< ValueType > const & that ) [default]
```

Copy constructor.

#### Parameters

|             |                     |
|-------------|---------------------|
| <i>that</i> | The object to copy. |
|-------------|---------------------|

### 9.76.3.2 NodeSMap() [2/2]

```
template<typename LabelT = std::string, typename NodeIDT = unsigned int, typename EdgeT =
unsigned long long int>
```

```
template<typename ValueType >
LinkPred::DNetwork< LabelT, NodeIDT, EdgeT >::NodeSMap< ValueType >::NodeSMap (
    NodeSMap< ValueType > && that ) [default]
```

Move constructor.

#### Parameters

|             |                     |
|-------------|---------------------|
| <i>that</i> | The object to move. |
|-------------|---------------------|

### 9.76.3.3 ~NodeSMap()

```
template<typename LabelT = std::string, typename NodeIDT = unsigned int, typename EdgeT =
unsigned long long int>
template<typename ValueType >
LinkPred::DNetwork< LabelT, NodeIDT, EdgeT >::NodeSMap< ValueType >::~~NodeSMap ( ) [default]
```

Destructor.

## 9.76.4 Member Function Documentation

### 9.76.4.1 at()

```
template<typename LabelT = std::string, typename NodeIDT = unsigned int, typename EdgeT =
unsigned long long int>
template<typename ValueType >
ValueType LinkPred::DNetwork< LabelT, NodeIDT, EdgeT >::NodeSMap< ValueType >::at (
    NodeID const & i ) const [inline]
```

#### Parameters

|          |            |
|----------|------------|
| <i>i</i> | A node ID. |
|----------|------------|

#### Returns

The value associated with the node *i*.

### 9.76.4.2 begin()

```
template<typename LabelT = std::string, typename NodeIDT = unsigned int, typename EdgeT =
unsigned long long int>
template<typename ValueType >
NodeSMapIterator LinkPred::DNetwork< LabelT, NodeIDT, EdgeT >::NodeSMap< ValueType >::begin (
) [inline]
```

**Returns**

An iterator to the first element in the map.

**9.76.4.3 cbegin()**

```
template<typename LabelT = std::string, typename NodeIDT = unsigned int, typename EdgeT =
unsigned long long int>
template<typename ValueType >
NodeSMapConstIterator LinkPred::DNetwork< LabelT, NodeIDT, EdgeT >::NodeSMap< ValueType >↵
::cbegin ( ) const [inline]
```

**Returns**

A constant iterator to the first element in the map.

**9.76.4.4 cend()**

```
template<typename LabelT = std::string, typename NodeIDT = unsigned int, typename EdgeT =
unsigned long long int>
template<typename ValueType >
NodeSMapConstIterator LinkPred::DNetwork< LabelT, NodeIDT, EdgeT >::NodeSMap< ValueType >↵
::cend ( ) const [inline]
```

**Returns**

A constant iterator to one-past-the-last element in the map.

**9.76.4.5 end()**

```
template<typename LabelT = std::string, typename NodeIDT = unsigned int, typename EdgeT =
unsigned long long int>
template<typename ValueType >
NodeSMapIterator LinkPred::DNetwork< LabelT, NodeIDT, EdgeT >::NodeSMap< ValueType >::end ( )
[inline]
```

**Returns**

An iterator to one-past-the-last element in the map.

**9.76.4.6 find()**

```
template<typename LabelT = std::string, typename NodeIDT = unsigned int, typename EdgeT =
unsigned long long int>
template<typename ValueType >
auto LinkPred::DNetwork< LabelT, NodeIDT, EdgeT >::NodeSMap< ValueType >::find (
NodeID const & i ) [inline]
```

## Parameters

|          |            |
|----------|------------|
| <i>i</i> | A node ID. |
|----------|------------|

## Returns

An iterator to the element with key *i*.

**9.76.4.7 operator=()** [1/2]

```
template<typename LabelT = std::string, typename NodeIDT = unsigned int, typename EdgeT =
unsigned long long int>
template<typename ValueType >
NodeSMap& LinkPred::DNetwork< LabelT, NodeIDT, EdgeT >::NodeSMap< ValueType >::operator= (
    NodeSMap< ValueType > && that ) [default]
```

Move assignment operator.

## Parameters

|             |                     |
|-------------|---------------------|
| <i>that</i> | The object to move. |
|-------------|---------------------|

**9.76.4.8 operator=()** [2/2]

```
template<typename LabelT = std::string, typename NodeIDT = unsigned int, typename EdgeT =
unsigned long long int>
template<typename ValueType >
NodeSMap& LinkPred::DNetwork< LabelT, NodeIDT, EdgeT >::NodeSMap< ValueType >::operator= (
    NodeSMap< ValueType > const & that ) [default]
```

Copy assignment operator.

## Parameters

|             |                     |
|-------------|---------------------|
| <i>that</i> | The object to copy. |
|-------------|---------------------|

**9.76.4.9 operator[]()** [1/2]

```
template<typename LabelT = std::string, typename NodeIDT = unsigned int, typename EdgeT =
unsigned long long int>
template<typename ValueType >
ValueType& LinkPred::DNetwork< LabelT, NodeIDT, EdgeT >::NodeSMap< ValueType >::operator[] (
    NodeID const & i ) [inline]
```

**Parameters**

|          |            |
|----------|------------|
| <i>i</i> | A node ID. |
|----------|------------|

**Returns**

A reference to the value associated with the node *i*.

**9.76.4.10 operator[]() [2/2]**

```
template<typename LabelT = std::string, typename NodeIDT = unsigned int, typename EdgeT =
unsigned long long int>
template<typename ValueType >
ValueType LinkPred::DNetwork< LabelT, NodeIDT, EdgeT >::NodeSMap< ValueType >::operator[] (
    NodeID const & i ) const [inline]
```

**Parameters**

|          |            |
|----------|------------|
| <i>i</i> | A node ID. |
|----------|------------|

**Returns**

The value associated with the node *i*.

**9.76.4.11 size()**

```
template<typename LabelT = std::string, typename NodeIDT = unsigned int, typename EdgeT =
unsigned long long int>
template<typename ValueType >
std::size_t LinkPred::DNetwork< LabelT, NodeIDT, EdgeT >::NodeSMap< ValueType >::size ( )
const [inline]
```

**Returns**

The number of elements in the map (those that were explicitly inserted).

The documentation for this class was generated from the following file:

- [include/linkpred/core/dnetwork/dnetwork.hpp](#)

## 9.77 LinkPred::UNetwork< LabelT, NodeIDT, EdgeT >::NodeSMap< ValueType > Class Template Reference

A sparse node map.

```
#include <unetwork.hpp>
```



## Public Types

- using [NodeSMapIterator](#) = typename std::map< [NodeID](#), ValueType >::iterator
- using [NodeSMapConstIterator](#) = typename std::map< [NodeID](#), ValueType >::const\_iterator

## Public Member Functions

- [NodeSMap](#) ([NodeSMap](#) const &that)=default
- [NodeSMap](#) & [operator=](#) ([NodeSMap](#) const &that)=default
- [NodeSMap](#) ([NodeSMap](#) &&that)=default
- [NodeSMap](#) & [operator=](#) ([NodeSMap](#) &&that)=default
- auto [find](#) ([NodeID](#) const &i)
- ValueType [operator\[\]](#) ([NodeID](#) const &i) const
- ValueType & [operator\[\]](#) ([NodeID](#) const &i)
- ValueType [at](#) ([NodeID](#) const &i) const
- [NodeSMapIterator](#) [begin](#) ()
- [NodeSMapIterator](#) [end](#) ()
- [NodeSMapConstIterator](#) [cbegin](#) () const
- [NodeSMapConstIterator](#) [cend](#) () const
- std::size\_t [size](#) () const
- [~NodeSMap](#) ()=default

## Friends

- class [UNetwork](#)

### 9.77.1 Detailed Description

```
template<typename LabelT = std::string, typename NodeIDT = unsigned int, typename EdgeT = unsigned long long int>
template<typename ValueType>
class LinkPred::UNetwork< LabelT, NodeIDT, EdgeT >::NodeSMap< ValueType >
```

A sparse node map.

This class can be used to assign a value to every node in the network. Access to values is done in constant time.

#### Template Parameters

|                  |                        |
|------------------|------------------------|
| <i>ValueType</i> | Type of mapped values. |
|------------------|------------------------|

### 9.77.2 Member Typedef Documentation

#### 9.77.2.1 NodeSMapConstIterator

```
template<typename LabelT = std::string, typename NodeIDT = unsigned int, typename EdgeT =
unsigned long long int>
```

```
template<typename ValueType >
using LinkPred::UNetwork< LabelT, NodeIDT, EdgeT >::NodeSMap< ValueType >::NodeSMapConstIterator
= typename std::map<NodeID, ValueType>::const_iterator
```

A constant iterator on the map values.

### 9.77.2.2 NodeSMapIterator

```
template<typename LabelT = std::string, typename NodeIDT = unsigned int, typename EdgeT =
unsigned long long int>
template<typename ValueType >
using LinkPred::UNetwork< LabelT, NodeIDT, EdgeT >::NodeSMap< ValueType >::NodeSMapIterator =
typename std::map<NodeID, ValueType>::iterator
```

Iterator on the map values.

## 9.77.3 Constructor & Destructor Documentation

### 9.77.3.1 NodeSMap() [1/2]

```
template<typename LabelT = std::string, typename NodeIDT = unsigned int, typename EdgeT =
unsigned long long int>
template<typename ValueType >
LinkPred::UNetwork< LabelT, NodeIDT, EdgeT >::NodeSMap< ValueType >::NodeSMap (
    NodeSMap< ValueType > const & that ) [default]
```

Copy constructor.

#### Parameters

|             |                     |
|-------------|---------------------|
| <i>that</i> | The object to copy. |
|-------------|---------------------|

### 9.77.3.2 NodeSMap() [2/2]

```
template<typename LabelT = std::string, typename NodeIDT = unsigned int, typename EdgeT =
unsigned long long int>
template<typename ValueType >
LinkPred::UNetwork< LabelT, NodeIDT, EdgeT >::NodeSMap< ValueType >::NodeSMap (
    NodeSMap< ValueType > && that ) [default]
```

Move constructor.

#### Parameters

|             |                     |
|-------------|---------------------|
| <i>that</i> | The object to move. |
|-------------|---------------------|

### 9.77.3.3 ~NodeSMap()

```
template<typename LabelT = std::string, typename NodeIDT = unsigned int, typename EdgeT =
unsigned long long int>
template<typename ValueType >
LinkPred::UNetwork< LabelT, NodeIDT, EdgeT >::NodeSMap< ValueType >::~~NodeSMap ( ) [default]
```

Destructor.

## 9.77.4 Member Function Documentation

### 9.77.4.1 at()

```
template<typename LabelT = std::string, typename NodeIDT = unsigned int, typename EdgeT =
unsigned long long int>
template<typename ValueType >
ValueType LinkPred::UNetwork< LabelT, NodeIDT, EdgeT >::NodeSMap< ValueType >::at (
    NodeID const & i ) const [inline]
```

#### Parameters

|          |            |
|----------|------------|
| <i>i</i> | A node ID. |
|----------|------------|

#### Returns

The value associated with the node *i*.

### 9.77.4.2 begin()

```
template<typename LabelT = std::string, typename NodeIDT = unsigned int, typename EdgeT =
unsigned long long int>
template<typename ValueType >
NodeSMapIterator LinkPred::UNetwork< LabelT, NodeIDT, EdgeT >::NodeSMap< ValueType >::begin (
) [inline]
```

#### Returns

An iterator to the first element in the map.

### 9.77.4.3 cbegin()

```
template<typename LabelT = std::string, typename NodeIDT = unsigned int, typename EdgeT =
unsigned long long int>
template<typename ValueType >
NodeSMapConstIterator LinkPred::UNetwork< LabelT, NodeIDT, EdgeT >::NodeSMap< ValueType >↔
::cbegin ( ) const [inline]
```

#### Returns

A constant iterator to the first element in the map.

### 9.77.4.4 cend()

```
template<typename LabelT = std::string, typename NodeIDT = unsigned int, typename EdgeT =
unsigned long long int>
template<typename ValueType >
NodeSMapConstIterator LinkPred::UNetwork< LabelT, NodeIDT, EdgeT >::NodeSMap< ValueType >↔
::cend ( ) const [inline]
```

#### Returns

A constant iterator to one-past-the-last element in the map.

### 9.77.4.5 end()

```
template<typename LabelT = std::string, typename NodeIDT = unsigned int, typename EdgeT =
unsigned long long int>
template<typename ValueType >
NodeSMapIterator LinkPred::UNetwork< LabelT, NodeIDT, EdgeT >::NodeSMap< ValueType >::end ( )
[inline]
```

#### Returns

An iterator to one-past-the-last element in the map.

### 9.77.4.6 find()

```
template<typename LabelT = std::string, typename NodeIDT = unsigned int, typename EdgeT =
unsigned long long int>
template<typename ValueType >
auto LinkPred::UNetwork< LabelT, NodeIDT, EdgeT >::NodeSMap< ValueType >::find (
NodeID const & i ) [inline]
```

## Parameters

|          |            |
|----------|------------|
| <i>i</i> | A node ID. |
|----------|------------|

## Returns

An iterator to the element with key *i*.

**9.77.4.7 operator=()** [1/2]

```
template<typename LabelT = std::string, typename NodeIDT = unsigned int, typename EdgeT =
unsigned long long int>
template<typename ValueType >
NodeSMap& LinkPred::UNetwork< LabelT, NodeIDT, EdgeT >::NodeSMap< ValueType >::operator= (
    NodeSMap< ValueType > && that ) [default]
```

Move assignment operator.

## Parameters

|             |                     |
|-------------|---------------------|
| <i>that</i> | The object to move. |
|-------------|---------------------|

**9.77.4.8 operator=()** [2/2]

```
template<typename LabelT = std::string, typename NodeIDT = unsigned int, typename EdgeT =
unsigned long long int>
template<typename ValueType >
NodeSMap& LinkPred::UNetwork< LabelT, NodeIDT, EdgeT >::NodeSMap< ValueType >::operator= (
    NodeSMap< ValueType > const & that ) [default]
```

Copy assignment operator.

## Parameters

|             |                     |
|-------------|---------------------|
| <i>that</i> | The object to copy. |
|-------------|---------------------|

**9.77.4.9 operator[]()** [1/2]

```
template<typename LabelT = std::string, typename NodeIDT = unsigned int, typename EdgeT =
unsigned long long int>
template<typename ValueType >
ValueType& LinkPred::UNetwork< LabelT, NodeIDT, EdgeT >::NodeSMap< ValueType >::operator[] (
    NodeID const & i ) [inline]
```

**Parameters**

|          |            |
|----------|------------|
| <i>i</i> | A node ID. |
|----------|------------|

**Returns**

A reference to the value associated with the node *i*.

**9.77.4.10 operator[]() [2/2]**

```
template<typename LabelT = std::string, typename NodeIDT = unsigned int, typename EdgeT =
unsigned long long int>
template<typename ValueType >
ValueType LinkPred::UNetwork< LabelT, NodeIDT, EdgeT >::NodeSMap< ValueType >::operator[] (
    NodeID const & i ) const [inline]
```

**Parameters**

|          |            |
|----------|------------|
| <i>i</i> | A node ID. |
|----------|------------|

**Returns**

The value associated with the node *i*.

**9.77.4.11 size()**

```
template<typename LabelT = std::string, typename NodeIDT = unsigned int, typename EdgeT =
unsigned long long int>
template<typename ValueType >
std::size_t LinkPred::UNetwork< LabelT, NodeIDT, EdgeT >::NodeSMap< ValueType >::size ( )
const [inline]
```

**Returns**

The number of elements in the map (those that were explicitly inserted).

The documentation for this class was generated from the following file:

- [include/linkpred/core/unetwork/unetwork.hpp](#)

## 9.78 LinkPred::UNetwork< LabelT, NodeIDT, EdgeT >::NonEdgelt Class Reference

Nonedges iterator.

```
#include <unetwork.hpp>
```

Inheritance diagram for LinkPred::UNetwork< LabelT, NodeIDT, EdgeT >::NonEdgelt:

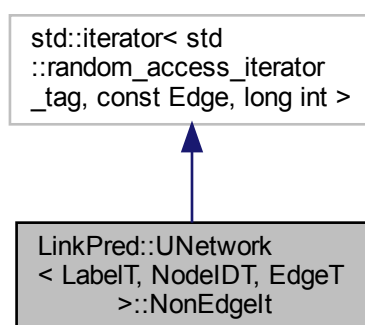

Collaboration diagram for LinkPred::UNetwork< LabelT, NodeIDT, EdgeT >::NonEdgelt:

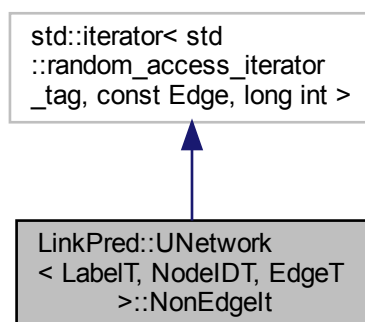

### Public Types

- using [pointer](#) = typename std::iterator< std::random\_access\_iterator\_tag, const [Edge](#), long int >::pointer
- using [reference](#) = typename std::iterator< std::random\_access\_iterator\_tag, const [Edge](#), long int >::reference
- using [difference\\_type](#) = typename std::iterator< std::random\_access\_iterator\_tag, const [Edge](#), long int >::difference\_type

## Public Member Functions

- [NonEdgelt](#) ([NonEdgelt](#) const &that)=default
- [NonEdgelt](#) & [operator=](#) ([NonEdgelt](#) const &that)=default
- [NonEdgelt](#) ([NonEdgelt](#) &&that)=default
- [NonEdgelt](#) & [operator=](#) ([NonEdgelt](#) &&that)=default
- [reference operator\\*](#) ()
- [pointer operator->](#) ()
- [NonEdgelt](#) & [operator++](#) ()
- [NonEdgelt](#) & [operator--](#) ()
- [NonEdgelt](#) [operator++](#) (int)
- [NonEdgelt](#) [operator--](#) (int)
- [NonEdgelt](#) [operator+](#) (const [difference\\_type](#) &n) const
- [NonEdgelt](#) & [operator+=](#) (const [difference\\_type](#) &n)
- [NonEdgelt](#) [operator-](#) (const [difference\\_type](#) &n) const
- [NonEdgelt](#) & [operator-=](#) (const [difference\\_type](#) &n)
- [difference\\_type](#) [operator-](#) (const [NonEdgelt](#) &that) const
- bool [operator==](#) (const [NonEdgelt](#) &that) const
- bool [operator!=](#) (const [NonEdgelt](#) &that) const
- bool [operator<](#) (const [NonEdgelt](#) &that) const
- bool [operator>](#) (const [NonEdgelt](#) &that) const
- bool [operator<=](#) (const [NonEdgelt](#) &that) const
- bool [operator>=](#) (const [NonEdgelt](#) &that) const

## Friends

- class [UNetwork](#)

### 9.78.1 Detailed Description

```
template<typename LabelT = std::string, typename NodeIDT = unsigned int, typename EdgeT = unsigned long long int>
class LinkPred::UNetwork< LabelT, NodeIDT, EdgeT >::NonEdgelt
```

Nonedges iterator.

### 9.78.2 Member Typedef Documentation

#### 9.78.2.1 [difference\\_type](#)

```
template<typename LabelT = std::string, typename NodeIDT = unsigned int, typename EdgeT =
unsigned long long int>
using LinkPred::UNetwork< LabelT, NodeIDT, EdgeT >::NonEdgeIt::difference_type = typename
std::iterator<std::random_access_iterator_tag, const Edge, long int>::difference_type
```

The difference type associated with the iterator.



### 9.78.2.2 pointer

```
template<typename LabelT = std::string, typename NodeIDT = unsigned int, typename EdgeT =
unsigned long long int>
using LinkPred::UNetwork< LabelT, NodeIDT, EdgeT >::NonEdgeIt::pointer = typename std::iterator<std::
::random_access_iterator_tag, const Edge, long int>::pointer
```

The pointer type associated with the iterator.

### 9.78.2.3 reference

```
template<typename LabelT = std::string, typename NodeIDT = unsigned int, typename EdgeT =
unsigned long long int>
using LinkPred::UNetwork< LabelT, NodeIDT, EdgeT >::NonEdgeIt::reference = typename std::
::iterator<std::random_access_iterator_tag, const Edge, long int>::reference
```

The reference type associated with the iterator.

## 9.78.3 Constructor & Destructor Documentation

### 9.78.3.1 NonEdgeIt() [1/2]

```
template<typename LabelT = std::string, typename NodeIDT = unsigned int, typename EdgeT =
unsigned long long int>
LinkPred::UNetwork< LabelT, NodeIDT, EdgeT >::NonEdgeIt::NonEdgeIt (
    NonEdgeIt const & that ) [default]
```

Copy constructor.

#### Parameters

|             |                     |
|-------------|---------------------|
| <i>that</i> | The object to copy. |
|-------------|---------------------|

### 9.78.3.2 NonEdgeIt() [2/2]

```
template<typename LabelT = std::string, typename NodeIDT = unsigned int, typename EdgeT =
unsigned long long int>
LinkPred::UNetwork< LabelT, NodeIDT, EdgeT >::NonEdgeIt::NonEdgeIt (
    NonEdgeIt && that ) [default]
```

Move constructor.

#### Parameters

|             |                     |
|-------------|---------------------|
| <i>that</i> | The object to move. |
|-------------|---------------------|

## 9.78.4 Member Function Documentation

### 9.78.4.1 operator"!="()

```
template<typename LabelT = std::string, typename NodeIDT = unsigned int, typename EdgeT =
unsigned long long int>
bool LinkPred::UNetwork< LabelT, NodeIDT, EdgeT >::NonEdgeIt::operator!= (
    const NonEdgeIt & that ) const [inline]
```

#### Parameters

|             |                     |
|-------------|---------------------|
| <i>that</i> | The other iterator. |
|-------------|---------------------|

#### Returns

True if this is not equal to that.

### 9.78.4.2 operator\*()

```
template<typename LabelT = std::string, typename NodeIDT = unsigned int, typename EdgeT =
unsigned long long int>
reference LinkPred::UNetwork< LabelT, NodeIDT, EdgeT >::NonEdgeIt::operator* ( ) [inline]
```

Dereference operator.

#### Returns

A reference to the object to which the iterator points.

### 9.78.4.3 operator+()

```
template<typename LabelT = std::string, typename NodeIDT = unsigned int, typename EdgeT =
unsigned long long int>
NonEdgeIt LinkPred::UNetwork< LabelT, NodeIDT, EdgeT >::NonEdgeIt::operator+ (
    const difference_type & n ) const [inline]
```

Arithmetic + operator.

#### Parameters

|          |                  |
|----------|------------------|
| <i>n</i> | Increment value. |
|----------|------------------|

**Returns**

The new iterator.

**9.78.4.4 operator++() [1/2]**

```
template<typename LabelT = std::string, typename NodeIDT = unsigned int, typename EdgeT =
unsigned long long int>
NonEdgeIt& LinkPred::UNetwork< LabelT, NodeIDT, EdgeT >::NonEdgeIt::operator++ ( ) [inline]
```

Pre-increment operator.

**Returns**

A reference to the new iterator.

**9.78.4.5 operator++() [2/2]**

```
template<typename LabelT = std::string, typename NodeIDT = unsigned int, typename EdgeT =
unsigned long long int>
NonEdgeIt LinkPred::UNetwork< LabelT, NodeIDT, EdgeT >::NonEdgeIt::operator++ (
    int ) [inline]
```

Post-increment operator.

**Returns**

A reference to the new iterator.

**9.78.4.6 operator+=()**

```
template<typename LabelT = std::string, typename NodeIDT = unsigned int, typename EdgeT =
unsigned long long int>
NonEdgeIt& LinkPred::UNetwork< LabelT, NodeIDT, EdgeT >::NonEdgeIt::operator+= (
    const difference_type & n ) [inline]
```

Arithmetic += operator.

**Parameters**

|          |                  |
|----------|------------------|
| <i>n</i> | Increment value. |
|----------|------------------|

**Returns**

A reference to the new iterator.

**9.78.4.7 operator-() [1/2]**

```
template<typename LabelT = std::string, typename NodeIDT = unsigned int, typename EdgeT =
unsigned long long int>
NonEdgeIt LinkPred::UNetwork< LabelT, NodeIDT, EdgeT >::NonEdgeIt::operator- (
    const difference_type & n ) const [inline]
```

Arithmetic - operator.

**Parameters**

|          |                  |
|----------|------------------|
| <i>n</i> | Decrement value. |
|----------|------------------|

**Returns**

The new iterator.

**9.78.4.8 operator-() [2/2]**

```
template<typename LabelT = std::string, typename NodeIDT = unsigned int, typename EdgeT =
unsigned long long int>
difference_type LinkPred::UNetwork< LabelT, NodeIDT, EdgeT >::NonEdgeIt::operator- (
    const NonEdgeIt & that ) const [inline]
```

Difference between the present iterator and the one passed as parameter.

**Parameters**

|             |                     |
|-------------|---------------------|
| <i>that</i> | The other iterator. |
|-------------|---------------------|

**Returns**

The difference between the current and that iterator.

**9.78.4.9 operator--() [1/2]**

```
template<typename LabelT = std::string, typename NodeIDT = unsigned int, typename EdgeT =
unsigned long long int>
NonEdgeIt& LinkPred::UNetwork< LabelT, NodeIDT, EdgeT >::NonEdgeIt::operator-- ( ) [inline]
```

Pre-decrement operator.

**Returns**

A reference to the new iterator.

**9.78.4.10 operator--() [2/2]**

```
template<typename LabelT = std::string, typename NodeIDT = unsigned int, typename EdgeT =
unsigned long long int>
NonEdgeIt LinkPred::UNetwork< LabelT, NodeIDT, EdgeT >::NonEdgeIt::operator-- (
    int ) [inline]
```

Post-decrement operator.

**Returns**

A reference to the new iterator.

**9.78.4.11 operator-=()**

```
template<typename LabelT = std::string, typename NodeIDT = unsigned int, typename EdgeT =
unsigned long long int>
NonEdgeIt& LinkPred::UNetwork< LabelT, NodeIDT, EdgeT >::NonEdgeIt::operator-= (
    const difference_type & n ) [inline]
```

Arithmetic -= operator.

**Parameters**

|          |                  |
|----------|------------------|
| <i>n</i> | Decrement value. |
|----------|------------------|

**Returns**

A reference to the new iterator.

**9.78.4.12 operator->()**

```
template<typename LabelT = std::string, typename NodeIDT = unsigned int, typename EdgeT =
unsigned long long int>
pointer LinkPred::UNetwork< LabelT, NodeIDT, EdgeT >::NonEdgeIt::operator-> ( ) [inline]
```

Arrow operator.

**Returns**

A pointer to the object to which the iterator points.

### 9.78.4.13 operator<()

```
template<typename LabelT = std::string, typename NodeIDT = unsigned int, typename EdgeT =
unsigned long long int>
bool LinkPred::UNetwork< LabelT, NodeIDT, EdgeT >::NonEdgeIt::operator< (
    const NonEdgeIt & that ) const [inline]
```

#### Parameters

|             |                     |
|-------------|---------------------|
| <i>that</i> | The other iterator. |
|-------------|---------------------|

#### Returns

True if this is less than that.

### 9.78.4.14 operator<=()

```
template<typename LabelT = std::string, typename NodeIDT = unsigned int, typename EdgeT =
unsigned long long int>
bool LinkPred::UNetwork< LabelT, NodeIDT, EdgeT >::NonEdgeIt::operator<= (
    const NonEdgeIt & that ) const [inline]
```

#### Parameters

|             |                     |
|-------------|---------------------|
| <i>that</i> | The other iterator. |
|-------------|---------------------|

#### Returns

True if this is greater or equal to that.

### 9.78.4.15 operator=() [1/2]

```
template<typename LabelT = std::string, typename NodeIDT = unsigned int, typename EdgeT =
unsigned long long int>
NonEdgeIt& LinkPred::UNetwork< LabelT, NodeIDT, EdgeT >::NonEdgeIt::operator= (
    NonEdgeIt && that ) [default]
```

Move assignment operator.

#### Parameters

|             |                     |
|-------------|---------------------|
| <i>that</i> | The object to move. |
|-------------|---------------------|

#### 9.78.4.16 operator=() [2/2]

```
template<typename LabelT = std::string, typename NodeIDT = unsigned int, typename EdgeT =
unsigned long long int>
NonEdgeIt& LinkPred::UNetwork< LabelT, NodeIDT, EdgeT >::NonEdgeIt::operator= (
    NonEdgeIt const & that ) [default]
```

Copy assignment operator.

##### Parameters

|             |                     |
|-------------|---------------------|
| <i>that</i> | The object to copy. |
|-------------|---------------------|

#### 9.78.4.17 operator==( )

```
template<typename LabelT = std::string, typename NodeIDT = unsigned int, typename EdgeT =
unsigned long long int>
bool LinkPred::UNetwork< LabelT, NodeIDT, EdgeT >::NonEdgeIt::operator== (
    const NonEdgeIt & that ) const [inline]
```

##### Parameters

|             |                     |
|-------------|---------------------|
| <i>that</i> | The other iterator. |
|-------------|---------------------|

##### Returns

True if this equals that.

#### 9.78.4.18 operator>()

```
template<typename LabelT = std::string, typename NodeIDT = unsigned int, typename EdgeT =
unsigned long long int>
bool LinkPred::UNetwork< LabelT, NodeIDT, EdgeT >::NonEdgeIt::operator> (
    const NonEdgeIt & that ) const [inline]
```

##### Parameters

|             |                     |
|-------------|---------------------|
| <i>that</i> | The other iterator. |
|-------------|---------------------|

##### Returns

True if this is greater than that.

### 9.78.4.19 operator>=()

```
template<typename LabelT = std::string, typename NodeIDT = unsigned int, typename EdgeT =
unsigned long long int>
bool LinkPred::UNetwork< LabelT, NodeIDT, EdgeT >::NonEdgeIt::operator>= (
    const NonEdgeIt & that ) const [inline]
```

#### Parameters

|             |                     |
|-------------|---------------------|
| <i>that</i> | The other iterator. |
|-------------|---------------------|

#### Returns

True if this is less or equal to that.

## 9.78.5 Friends And Related Function Documentation

### 9.78.5.1 UNetwork

```
template<typename LabelT = std::string, typename NodeIDT = unsigned int, typename EdgeT =
unsigned long long int>
friend class UNetwork [friend]
```

UNetwork is a friend.

The documentation for this class was generated from the following file:

- [include/linkpred/core/unetwork/unetwork.hpp](#)

## 9.79 LinkPred::DNetwork< LabelT, NodeIDT, EdgeT >::NonEdgeIt Class Reference

Nonedges iterator.

```
#include <dnetwork.hpp>
```

Inheritance diagram for LinkPred::DNetwork< LabelT, NodeIDT, EdgeT >::NonEdgeIt:

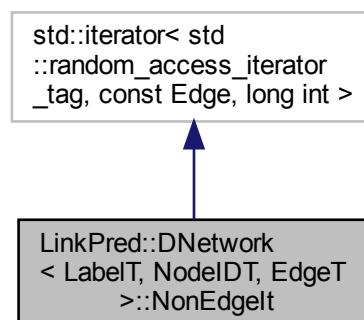



Collaboration diagram for LinkPred::DNetwork< LabelT, NodeIDT, EdgeT >::NonEdgelt:

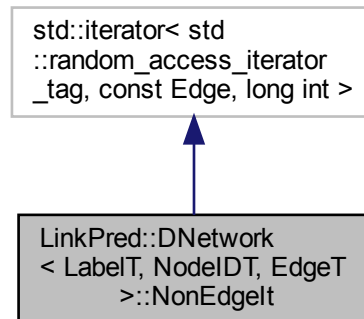

## Public Types

- using `pointer` = typename `std::iterator< std::random_access_iterator_tag, const Edge, long int >::pointer`
- using `reference` = typename `std::iterator< std::random_access_iterator_tag, const Edge, long int >::reference`
- using `difference_type` = typename `std::iterator< std::random_access_iterator_tag, const Edge, long int >::difference_type`

## Public Member Functions

- `NonEdgelt (NonEdgelt const &that)=default`
- `NonEdgelt & operator= (NonEdgelt const &that)=default`
- `NonEdgelt (NonEdgelt &&that)=default`
- `NonEdgelt & operator= (NonEdgelt &&that)=default`
- `reference operator* ()`
- `pointer operator-> ()`
- `NonEdgelt & operator++ ()`
- `NonEdgelt & operator-- ()`
- `NonEdgelt operator++ (int)`
- `NonEdgelt operator-- (int)`
- `NonEdgelt operator+ (const difference_type &n) const`
- `NonEdgelt & operator+= (const difference_type &n)`
- `NonEdgelt operator- (const difference_type &n) const`
- `NonEdgelt & operator-= (const difference_type &n)`
- `difference_type operator- (const NonEdgelt &that) const`
- `bool operator== (const NonEdgelt &that) const`
- `bool operator!= (const NonEdgelt &that) const`
- `bool operator< (const NonEdgelt &that) const`
- `bool operator> (const NonEdgelt &that) const`
- `bool operator<= (const NonEdgelt &that) const`
- `bool operator>= (const NonEdgelt &that) const`

## Friends

- class [DNetwork](#)

### 9.79.1 Detailed Description

```
template<typename LabelT = std::string, typename NodeIDT = unsigned int, typename EdgeT = unsigned long long int>
class LinkPred::DNetwork< LabelT, NodeIDT, EdgeT >::NonEdgeIt
```

Nonedges iterator.

### 9.79.2 Member Typedef Documentation

#### 9.79.2.1 difference\_type

```
template<typename LabelT = std::string, typename NodeIDT = unsigned int, typename EdgeT =
unsigned long long int>
using LinkPred::DNetwork< LabelT, NodeIDT, EdgeT >::NonEdgeIt::difference_type = typename
std::iterator<std::random_access_iterator_tag, const Edge, long int>::difference_type
```

The difference type associated with the iterator.

#### 9.79.2.2 pointer

```
template<typename LabelT = std::string, typename NodeIDT = unsigned int, typename EdgeT =
unsigned long long int>
using LinkPred::DNetwork< LabelT, NodeIDT, EdgeT >::NonEdgeIt::pointer = typename std::iterator<std::
::random_access_iterator_tag, const Edge, long int>::pointer
```

The pointer type associated with the iterator.

#### 9.79.2.3 reference

```
template<typename LabelT = std::string, typename NodeIDT = unsigned int, typename EdgeT =
unsigned long long int>
using LinkPred::DNetwork< LabelT, NodeIDT, EdgeT >::NonEdgeIt::reference = typename std::
::iterator<std::random_access_iterator_tag, const Edge, long int>::reference
```

The reference type associated with the iterator.

### 9.79.3 Constructor & Destructor Documentation

#### 9.79.3.1 NonEdgeIt() [1/2]

```
template<typename LabelT = std::string, typename NodeIDT = unsigned int, typename EdgeT =
unsigned long long int>
LinkPred::DNetwork< LabelT, NodeIDT, EdgeT >::NonEdgeIt::NonEdgeIt (
    NonEdgeIt const & that ) [default]
```

Copy constructor.

## Parameters

|             |                     |
|-------------|---------------------|
| <i>that</i> | The object to copy. |
|-------------|---------------------|

**9.79.3.2 NonEdgeIt()** [2/2]

```
template<typename LabelT = std::string, typename NodeIDT = unsigned int, typename EdgeT =
unsigned long long int>
LinkPred::DNetwork< LabelT, NodeIDT, EdgeT >::NonEdgeIt::NonEdgeIt (
    NonEdgeIt && that ) [default]
```

Move constructor.

## Parameters

|             |                     |
|-------------|---------------------|
| <i>that</i> | The object to move. |
|-------------|---------------------|

**9.79.4 Member Function Documentation****9.79.4.1 operator!=(())**

```
template<typename LabelT = std::string, typename NodeIDT = unsigned int, typename EdgeT =
unsigned long long int>
bool LinkPred::DNetwork< LabelT, NodeIDT, EdgeT >::NonEdgeIt::operator!=(
    const NonEdgeIt & that ) const [inline]
```

## Parameters

|             |                     |
|-------------|---------------------|
| <i>that</i> | The other iterator. |
|-------------|---------------------|

## Returns

True if this is not equal to that.

**9.79.4.2 operator\*()**

```
template<typename LabelT = std::string, typename NodeIDT = unsigned int, typename EdgeT =
unsigned long long int>
reference LinkPred::DNetwork< LabelT, NodeIDT, EdgeT >::NonEdgeIt::operator* ( ) [inline]
```

Dereference operator.

**Returns**

A reference to the object to which the iterator points.

**9.79.4.3 operator+()**

```
template<typename LabelT = std::string, typename NodeIDT = unsigned int, typename EdgeT =
unsigned long long int>
NonEdgeIt LinkPred::DNetwork< LabelT, NodeIDT, EdgeT >::NonEdgeIt::operator+ (
    const difference_type & n ) const [inline]
```

Arithmetic + operator.

**Parameters**

|          |                  |
|----------|------------------|
| <i>n</i> | Increment value. |
|----------|------------------|

**Returns**

The new iterator.

**9.79.4.4 operator++() [1/2]**

```
template<typename LabelT = std::string, typename NodeIDT = unsigned int, typename EdgeT =
unsigned long long int>
NonEdgeIt& LinkPred::DNetwork< LabelT, NodeIDT, EdgeT >::NonEdgeIt::operator++ ( ) [inline]
```

Pre-increment operator.

**Returns**

A reference to the new iterator.

**9.79.4.5 operator++() [2/2]**

```
template<typename LabelT = std::string, typename NodeIDT = unsigned int, typename EdgeT =
unsigned long long int>
NonEdgeIt LinkPred::DNetwork< LabelT, NodeIDT, EdgeT >::NonEdgeIt::operator++ (
    int ) [inline]
```

Post-increment operator.

**Returns**

A reference to the new iterator.

#### 9.79.4.6 operator+=()

```
template<typename LabelT = std::string, typename NodeIDT = unsigned int, typename EdgeT =
unsigned long long int>
NonEdgeIt & LinkPred::DNetwork< LabelT, NodeIDT, EdgeT >::NonEdgeIt::operator+= (
    const difference_type & n ) [inline]
```

Arithmetic += operator.

##### Parameters

|          |                  |
|----------|------------------|
| <i>n</i> | Increment value. |
|----------|------------------|

##### Returns

A reference to the new iterator.

#### 9.79.4.7 operator-() [1/2]

```
template<typename LabelT = std::string, typename NodeIDT = unsigned int, typename EdgeT =
unsigned long long int>
NonEdgeIt LinkPred::DNetwork< LabelT, NodeIDT, EdgeT >::NonEdgeIt::operator- (
    const difference_type & n ) const [inline]
```

Arithmetic - operator.

##### Parameters

|          |                  |
|----------|------------------|
| <i>n</i> | Decrement value. |
|----------|------------------|

##### Returns

The new iterator.

#### 9.79.4.8 operator-() [2/2]

```
template<typename LabelT = std::string, typename NodeIDT = unsigned int, typename EdgeT =
unsigned long long int>
difference_type LinkPred::DNetwork< LabelT, NodeIDT, EdgeT >::NonEdgeIt::operator- (
    const NonEdgeIt & that ) const [inline]
```

Difference between the present iterator and the one passed as parameter.

##### Parameters

|             |                     |
|-------------|---------------------|
| <i>that</i> | The other iterator. |
|-------------|---------------------|

**Returns**

The difference between the current and that iterator.

**9.79.4.9 operator--() [1/2]**

```
template<typename LabelT = std::string, typename NodeIDT = unsigned int, typename EdgeT =
unsigned long long int>
NonEdgeIt& LinkPred::DNetwork< LabelT, NodeIDT, EdgeT >::NonEdgeIt::operator-- ( ) [inline]
```

Pre-decrement operator.

**Returns**

A reference to the new iterator.

**9.79.4.10 operator--() [2/2]**

```
template<typename LabelT = std::string, typename NodeIDT = unsigned int, typename EdgeT =
unsigned long long int>
NonEdgeIt LinkPred::DNetwork< LabelT, NodeIDT, EdgeT >::NonEdgeIt::operator-- (
    int ) [inline]
```

Post-decrement operator.

**Returns**

A reference to the new iterator.

**9.79.4.11 operator-=()**

```
template<typename LabelT = std::string, typename NodeIDT = unsigned int, typename EdgeT =
unsigned long long int>
NonEdgeIt& LinkPred::DNetwork< LabelT, NodeIDT, EdgeT >::NonEdgeIt::operator-= (
    const difference_type & n ) [inline]
```

Arithmetic -= operator.

**Parameters**

|          |                  |
|----------|------------------|
| <i>n</i> | Decrement value. |
|----------|------------------|

**Returns**

A reference to the new iterator.

**9.79.4.12 operator->()**

```
template<typename LabelT = std::string, typename NodeIDT = unsigned int, typename EdgeT =
unsigned long long int>
pointer LinkPred::DNetwork< LabelT, NodeIDT, EdgeT >::NonEdgeIt::operator-> ( ) [inline]
```

Arrow operator.

**Returns**

A pointer to the object to which the iterator points.

**9.79.4.13 operator<()**

```
template<typename LabelT = std::string, typename NodeIDT = unsigned int, typename EdgeT =
unsigned long long int>
bool LinkPred::DNetwork< LabelT, NodeIDT, EdgeT >::NonEdgeIt::operator< (
    const NonEdgeIt & that ) const [inline]
```

**Parameters**

|             |                     |
|-------------|---------------------|
| <i>that</i> | The other iterator. |
|-------------|---------------------|

**Returns**

True if this is less than that.

**9.79.4.14 operator<=()**

```
template<typename LabelT = std::string, typename NodeIDT = unsigned int, typename EdgeT =
unsigned long long int>
bool LinkPred::DNetwork< LabelT, NodeIDT, EdgeT >::NonEdgeIt::operator<= (
    const NonEdgeIt & that ) const [inline]
```

**Parameters**

|             |                     |
|-------------|---------------------|
| <i>that</i> | The other iterator. |
|-------------|---------------------|

**Returns**

True if this is greater or equal to that.

**9.79.4.15 operator=()** [1/2]

```
template<typename LabelT = std::string, typename NodeIDT = unsigned int, typename EdgeT =
unsigned long long int>
NonEdgeIt& LinkPred::DNetwork< LabelT, NodeIDT, EdgeT >::NonEdgeIt::operator= (
    NonEdgeIt && that ) [default]
```

Move assignment operator.

**Parameters**

|             |                     |
|-------------|---------------------|
| <i>that</i> | The object to move. |
|-------------|---------------------|

**9.79.4.16 operator=()** [2/2]

```
template<typename LabelT = std::string, typename NodeIDT = unsigned int, typename EdgeT =
unsigned long long int>
NonEdgeIt& LinkPred::DNetwork< LabelT, NodeIDT, EdgeT >::NonEdgeIt::operator= (
    NonEdgeIt const & that ) [default]
```

Copy assignment operator.

**Parameters**

|             |                     |
|-------------|---------------------|
| <i>that</i> | The object to copy. |
|-------------|---------------------|

**9.79.4.17 operator==()**

```
template<typename LabelT = std::string, typename NodeIDT = unsigned int, typename EdgeT =
unsigned long long int>
bool LinkPred::DNetwork< LabelT, NodeIDT, EdgeT >::NonEdgeIt::operator== (
    const NonEdgeIt & that ) const [inline]
```

**Parameters**

|             |                     |
|-------------|---------------------|
| <i>that</i> | The other iterator. |
|-------------|---------------------|



**Returns**

True if this equals that.

**9.79.4.18 operator>()**

```
template<typename LabelT = std::string, typename NodeIDT = unsigned int, typename EdgeT =
unsigned long long int>
bool LinkPred::DNetwork< LabelT, NodeIDT, EdgeT >::NonEdgeIt::operator> (
    const NonEdgeIt & that ) const [inline]
```

**Parameters**

|             |                     |
|-------------|---------------------|
| <i>that</i> | The other iterator. |
|-------------|---------------------|

**Returns**

True if this is greater that.

**9.79.4.19 operator>=()**

```
template<typename LabelT = std::string, typename NodeIDT = unsigned int, typename EdgeT =
unsigned long long int>
bool LinkPred::DNetwork< LabelT, NodeIDT, EdgeT >::NonEdgeIt::operator>= (
    const NonEdgeIt & that ) const [inline]
```

**Parameters**

|             |                     |
|-------------|---------------------|
| <i>that</i> | The other iterator. |
|-------------|---------------------|

**Returns**

True if this is less or equal to that.

**9.79.5 Friends And Related Function Documentation****9.79.5.1 DNetwork**

```
template<typename LabelT = std::string, typename NodeIDT = unsigned int, typename EdgeT =
unsigned long long int>
friend class DNetwork [friend]
```

[DNetwork](#) is a friend.

The documentation for this class was generated from the following file:

- [include/linkpred/core/dnetwork/dnetwork.hpp](#)

## 9.80 LinkPred::Utils::PairCompRight< FirstT, SecondT, CompareT > Struct Template Reference

Class for comparing pairs based on second elements only.

```
#include <miscutils.hpp>
```

### Public Member Functions

- bool [operator\(\)](#) (std::pair< FirstT, SecondT > const &l, std::pair< FirstT, SecondT > const &r) const

#### 9.80.1 Detailed Description

```
template<typename FirstT, typename SecondT, typename CompareT>
struct LinkPred::Utils::PairCompRight< FirstT, SecondT, CompareT >
```

Class for comparing pairs based on second elements only.

##### Template Parameters

|                 |                       |
|-----------------|-----------------------|
| <i>FirstT</i>   | The first pair type.  |
| <i>SecondT</i>  | The second pair type. |
| <i>CompareT</i> | The comparator type.  |

#### 9.80.2 Member Function Documentation

##### 9.80.2.1 operator()

```
template<typename FirstT , typename SecondT , typename CompareT >
bool LinkPred::Utils::PairCompRight< FirstT, SecondT, CompareT >::operator() (
    std::pair< FirstT, SecondT > const & l,
    std::pair< FirstT, SecondT > const & r ) const [inline]
```

Compare pair based on second elements.

##### Parameters

|          |                  |
|----------|------------------|
| <i>l</i> | The first pair.  |
| <i>r</i> | The second pair. |

##### Returns

The result of the comparison.

The documentation for this struct was generated from the following file:

- include/linkpred/utis/[miscutils.hpp](#)

## 9.81 LinkPred::Pearson Class Reference

[Pearson](#) similarity ([Pearson](#) correlation coefficient).

```
#include <pearson.hpp>
```

Inheritance diagram for LinkPred::Pearson:

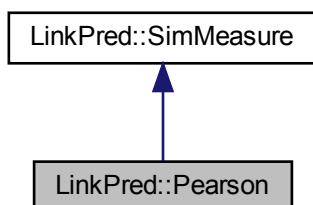

Collaboration diagram for LinkPred::Pearson:

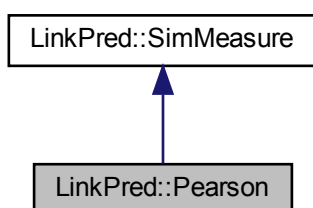

### Public Member Functions

- [Pearson](#) ()
- [Pearson](#) ([Pearson](#) const &that)=default
- [Pearson](#) & [operator=](#) ([Pearson](#) const &that)=default
- [Pearson](#) ([Pearson](#) &&that)=default
- [Pearson](#) & [operator=](#) ([Pearson](#) &&that)=default
- virtual double [sim](#) ([Vec](#) const &v1, [Vec](#) const &v2)
- virtual [~Pearson](#) ()=default

## 9.81.1 Detailed Description

[Pearson](#) similarity ([Pearson](#) correlation coefficient).

## 9.81.2 Constructor & Destructor Documentation

### 9.81.2.1 [Pearson\(\)](#) [1/3]

```
LinkPred::Pearson::Pearson ( ) [inline]
```

Constructor.

### 9.81.2.2 [Pearson\(\)](#) [2/3]

```
LinkPred::Pearson::Pearson (
    Pearson const & that ) [default]
```

Copy constructor.

#### Parameters

|             |                     |
|-------------|---------------------|
| <i>that</i> | The object to copy. |
|-------------|---------------------|

### 9.81.2.3 [Pearson\(\)](#) [3/3]

```
LinkPred::Pearson::Pearson (
    Pearson && that ) [default]
```

Move constructor.

#### Parameters

|             |                     |
|-------------|---------------------|
| <i>that</i> | The object to move. |
|-------------|---------------------|

### 9.81.2.4 [~Pearson\(\)](#)

```
virtual LinkPred::Pearson::~~Pearson ( ) [virtual], [default]
```

Destructor.

## 9.81.3 Member Function Documentation

### 9.81.3.1 operator=() [1/2]

```
Pearson& LinkPred::Pearson::operator= (
    Pearson && that ) [default]
```

Move assignment operator.

#### Parameters

|             |                     |
|-------------|---------------------|
| <i>that</i> | The object to move. |
|-------------|---------------------|

### 9.81.3.2 operator=() [2/2]

```
Pearson& LinkPred::Pearson::operator= (
    Pearson const & that ) [default]
```

Copy assignment operator.

#### Parameters

|             |                     |
|-------------|---------------------|
| <i>that</i> | The object to copy. |
|-------------|---------------------|

### 9.81.3.3 sim()

```
virtual double LinkPred::Pearson::sim (
    Vec const & v1,
    Vec const & v2 ) [virtual]
```

Compute the similarity between two vectors.

#### Parameters

|           |                                                     |
|-----------|-----------------------------------------------------|
| <i>v1</i> | First vector.                                       |
| <i>v2</i> | Second vector. Must be of the same dimension as v1. |

#### Returns

The similarity between v1 and v2.

Implements [LinkPred::SimMeasure](#).

The documentation for this class was generated from the following file:

- [include/linkpred/ml/simmeasures/pearson.hpp](#)

## 9.82 LinkPred::PEFactory< Network, LPredictorT, TestDataT, PerfMeasureT > Class Template Reference

Factory class to create link predictors and performance measures.

```
#include <perfevaluator.hpp>
```

### Public Member Functions

- virtual `std::vector< std::shared_ptr< LPredictorT > >` [getPredictors](#) (`std::shared_ptr< Network const >` obsNet)=0
- virtual `std::vector< std::shared_ptr< PerfMeasureT > >` [getPerfMeasures](#) (`TestDataT const &testData`)=0
- virtual `~PEFactory` ()=default

### 9.82.1 Detailed Description

```
template<typename Network = UNetwork<>, typename LPredictorT = ULPredictor<>, typename TestDataT = TestData<>,
typename PerfMeasureT = PerfMeasure< PredResults<TestDataT, LPredictorT>>>>
class LinkPred::PEFactory< Network, LPredictorT, TestDataT, PerfMeasureT >
```

Factory class to create link predictors and performance measures.

#### Template Parameters

|                     |                               |
|---------------------|-------------------------------|
| <i>Network</i>      | The network data type.        |
| <i>LPredictorT</i>  | The link predictor type.      |
| <i>TestDataT</i>    | The test data type.           |
| <i>PerfMeasureT</i> | The performance measure type. |

### 9.82.2 Constructor & Destructor Documentation

#### 9.82.2.1 ~PEFactory()

```
template<typename Network = UNetwork<>, typename LPredictorT = ULPredictor<>, typename TestDataT = TestData<>,
typename PerfMeasureT = PerfMeasure< PredResults<TestDataT, LPredictorT>>>>
virtual LinkPred::PEFactory< Network, LPredictorT, TestDataT, PerfMeasureT >::~~PEFactory ( )
[virtual], [default]
```

Destructor.

## 9.82.3 Member Function Documentation

### 9.82.3.1 getPerfMeasures()

```
template<typename Network = UNetwork<>, typename LPredictorT = ULPredictor<>, typename Test↵
DataT = TestData<>, typename PerfMeasureT = PerfMeasure< PredResults<TestDataT, LPredictor↵
T>>>
virtual std::vector<std::shared_ptr<PerfMeasureT> > LinkPred::PEFactory< Network, LPredictorT,
TestDataT, PerfMeasureT >::getPerfMeasures (
    TestDataT const & testData ) [pure virtual]
```

#### Returns

A vector of performance measures.

### 9.82.3.2 getPredictors()

```
template<typename Network = UNetwork<>, typename LPredictorT = ULPredictor<>, typename Test↵
DataT = TestData<>, typename PerfMeasureT = PerfMeasure< PredResults<TestDataT, LPredictor↵
T>>>
virtual std::vector<std::shared_ptr<LPredictorT> > LinkPred::PEFactory< Network, LPredictorT,
TestDataT, PerfMeasureT >::getPredictors (
    std::shared_ptr< Network const > obsNet ) [pure virtual]
```

#### Returns

A vector of predictors.

The documentation for this class was generated from the following file:

- include/linkpred/perf/perfevaluator.hpp

## 9.83 LinkPred::PerfCurve< PredResultsT > Class Template Reference

Abstract performance curve.

```
#include <perfmeasure.hpp>
```

Inheritance diagram for LinkPred::PerfCurve< PredResultsT >:

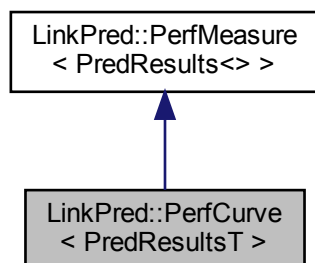

Collaboration diagram for LinkPred::PerfCurve< PredResultsT >:

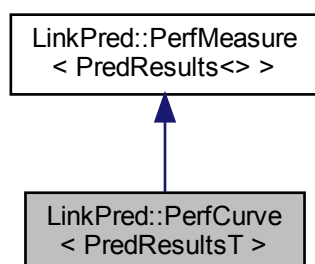

## Public Types

- using [ScoresItT](#) = typename [PerfMeasure](#)< PredResultsT >::[ScoresItT](#)

## Public Member Functions

- [PerfCurve](#) ()=default
- [PerfCurve](#) (std::string name)
- [PerfCurve](#) ([PerfCurve](#) const &that)=default
- [PerfCurve](#) & operator= ([PerfCurve](#) const &that)=default
- [PerfCurve](#) ([PerfCurve](#) &&that)=default
- [PerfCurve](#) & operator= ([PerfCurve](#) &&that)=default
- virtual void [eval](#) (std::shared\_ptr< PredResultsT > &predResults, [PerfResults](#) &results)=0
- virtual void [eval](#) ([ScoresItT](#) posScoresBegin, [ScoresItT](#) posScoresEnd, [ScoresItT](#) negScoresBegin, [ScoresItT](#) negScoresEnd, [SortOrder](#) &posSortOrder, [SortOrder](#) &negSortOrder, [PerfResults](#) &results)=0
- virtual std::vector< std::pair< double, double > > [getCurve](#) (std::shared\_ptr< PredResultsT > &predResults)=0



- virtual `std::vector< std::pair< double, double > >` `getCurve` (`ScoresItT` posScoresBegin, `ScoresItT` posScoresEnd, `ScoresItT` negScoresBegin, `ScoresItT` negScoresEnd, `SortOrder` &posSortOrder, `SortOrder` &negSortOrder)=0
- virtual `~PerfCurve` ()=default

### 9.83.1 Detailed Description

```
template<typename PredResultsT = PredResults<>>
class LinkPred::PerfCurve< PredResultsT >
```

Abstract performance curve.

#### Template Parameters

|                     |                              |
|---------------------|------------------------------|
| <i>PredResultsT</i> | The prediction results type. |
|---------------------|------------------------------|

### 9.83.2 Member Typedef Documentation

#### 9.83.2.1 ScoresItT

```
template<typename PredResultsT = PredResults<>>
using LinkPred::PerfCurve< PredResultsT >::ScoresItT = typename PerfMeasure<PredResultsT>::ScoresItT
```

Scores iterator type.

### 9.83.3 Constructor & Destructor Documentation

#### 9.83.3.1 PerfCurve() [1/4]

```
template<typename PredResultsT = PredResults<>>
LinkPred::PerfCurve< PredResultsT >::PerfCurve ( ) [default]
```

< The name of the performance measure. Constructor.

#### 9.83.3.2 PerfCurve() [2/4]

```
template<typename PredResultsT = PredResults<>>
LinkPred::PerfCurve< PredResultsT >::PerfCurve (
    std::string name ) [inline]
```

Constructor.

## Parameters

|             |                                      |
|-------------|--------------------------------------|
| <i>name</i> | The name of the performance measure. |
|-------------|--------------------------------------|

**9.83.3.3 PerfCurve()** [3/4]

```
template<typename PredResultsT = PredResults<>>
LinkPred::PerfCurve< PredResultsT >::PerfCurve (
    PerfCurve< PredResultsT > const & that ) [default]
```

Copy constructor.

## Parameters

|             |                     |
|-------------|---------------------|
| <i>that</i> | The object to copy. |
|-------------|---------------------|

**9.83.3.4 PerfCurve()** [4/4]

```
template<typename PredResultsT = PredResults<>>
LinkPred::PerfCurve< PredResultsT >::PerfCurve (
    PerfCurve< PredResultsT > && that ) [default]
```

Move constructor.

## Parameters

|             |                     |
|-------------|---------------------|
| <i>that</i> | The object to move. |
|-------------|---------------------|

**9.83.3.5 ~PerfCurve()**

```
template<typename PredResultsT = PredResults<>>
virtual LinkPred::PerfCurve< PredResultsT >::~~PerfCurve ( ) [virtual], [default]
```

Destructor.

**9.83.4 Member Function Documentation**

**9.83.4.1 eval()** [1/2]

```
template<typename PredResultsT = PredResults<>>
virtual void LinkPred::PerfCurve< PredResultsT >::eval (
    ScoresItT posScoresBegin,
    ScoresItT posScoresEnd,
    ScoresItT negScoresBegin,
    ScoresItT negScoresEnd,
    SortOrder & posSortOrder,
    SortOrder & negSortOrder,
    PerfResults & results ) [pure virtual]
```

Computes the performance measure.

**Parameters**

|                       |                                                                           |
|-----------------------|---------------------------------------------------------------------------|
| <i>posScoresBegin</i> | Iterator to the first positive score.                                     |
| <i>posScoresEnd</i>   | Iterator to one-past-the-last positive score.                             |
| <i>negScoresBegin</i> | Iterator to the first negative score.                                     |
| <i>negScoresEnd</i>   | Iterator to one-past-the-last negative score.                             |
| <i>posSortOrder</i>   | The sorting order of positive scores. This may be modified by the method. |
| <i>negSortOrder</i>   | The sorting order of negative scores. This may be modified by the method. |
| <i>results</i>        | To write results.                                                         |

**9.83.4.2 eval()** [2/2]

```
template<typename PredResultsT = PredResults<>>
virtual void LinkPred::PerfCurve< PredResultsT >::eval (
    std::shared_ptr< PredResultsT > & predResults,
    PerfResults & results ) [pure virtual]
```

Computes the performance measure (typically the area under the curve or AUC).

**Parameters**

|                    |                         |
|--------------------|-------------------------|
| <i>predResults</i> | The prediction results. |
| <i>results</i>     | To write results.       |

**9.83.4.3 getCurve()** [1/2]

```
template<typename PredResultsT = PredResults<>>
virtual std::vector<std::pair<double, double> > LinkPred::PerfCurve< PredResultsT >::get↵
Curve (
    ScoresItT posScoresBegin,
    ScoresItT posScoresEnd,
    ScoresItT negScoresBegin,
```

```

    ScoresItT negScoresEnd,
    SortOrder & posSortOrder,
    SortOrder & negSortOrder ) [pure virtual]

```

Computes the performance curve.

#### Parameters

|                       |                                                                           |
|-----------------------|---------------------------------------------------------------------------|
| <i>posScoresBegin</i> | Iterator to the first positive score.                                     |
| <i>posScoresEnd</i>   | Iterator to one-past-the-last positive score.                             |
| <i>negScoresBegin</i> | Iterator to the first negative score.                                     |
| <i>negScoresEnd</i>   | Iterator to one-past-the-last negative score.                             |
| <i>posSortOrder</i>   | The sorting order of positive scores. This may be modified by the method. |
| <i>negSortOrder</i>   | The sorting order of negative scores. This may be modified by the method. |

#### Returns

A curve in the form of an `std::vector` of pairs representing the x and y coordinates.

#### 9.83.4.4 `getCurve()` [2/2]

```

template<typename PredResultsT = PredResults<>>
virtual std::vector<std::pair<double, double> > LinkPred::PerfCurve< PredResultsT >::get↵
Curve (
    std::shared_ptr< PredResultsT > & predResults ) [pure virtual]

```

Computes the performance curve.

#### Parameters

|                    |                         |
|--------------------|-------------------------|
| <i>predResults</i> | The prediction results. |
|--------------------|-------------------------|

#### Returns

A curve in the form of an `std::vector` of pairs representing the x and y coordinates.

#### 9.83.4.5 `operator=()` [1/2]

```

template<typename PredResultsT = PredResults<>>
PerfCurve& LinkPred::PerfCurve< PredResultsT >::operator= (
    PerfCurve< PredResultsT > && that ) [default]

```

Move assignment operator.

## Parameters

|             |                     |
|-------------|---------------------|
| <i>that</i> | The object to move. |
|-------------|---------------------|

## 9.83.4.6 operator=() [2/2]

```
template<typename PredResultsT = PredResults<>>
PerfCurve& LinkPred::PerfCurve< PredResultsT >::operator= (
    PerfCurve< PredResultsT > const & that ) [default]
```

Copy assignment operator.

## Parameters

|             |                     |
|-------------|---------------------|
| <i>that</i> | The object to copy. |
|-------------|---------------------|

The documentation for this class was generated from the following file:

- include/linkpred/perf/perfmeasure.hpp

## 9.84 LinkPred::PerfeEvalExpDescp< Network > Struct Template Reference

Structure storing experiment description.

```
#include <perfevaluator.hpp>
```

### Public Attributes

- bool [timingEnabled](#) = false
- std::ostream \* [out](#) = &std::cout
- std::size\_t [nbTestRuns](#) = 1
- std::shared\_ptr< Network > [refNet](#)
- bool [keepConnected](#) = false
- double [fnRatio](#) = 1
- double [tnRatio](#) = 1
- double [ratioStart](#) = 0.1
- double [ratioEnd](#) = 0.1
- double [ratioStep](#) = 0.1
- long int [seed](#) = 0

### 9.84.1 Detailed Description

```
template<typename Network = UNetwork<>>
struct LinkPred::PerfeEvalExpDescp< Network >
```

Structure storing experiment description.

## 9.84.2 Member Data Documentation

### 9.84.2.1 fnRatio

```
template<typename Network = UNetwork<>>
double LinkPred::PerfeEvalExpDescp< Network >::fnRatio = 1
```

Ratio of false negatives used in the test set.

### 9.84.2.2 keepConnected

```
template<typename Network = UNetwork<>>
bool LinkPred::PerfeEvalExpDescp< Network >::keepConnected = false
```

Whether to keep the network connected.

### 9.84.2.3 nbTestRuns

```
template<typename Network = UNetwork<>>
std::size_t LinkPred::PerfeEvalExpDescp< Network >::nbTestRuns = 1
```

Number of test runs.

### 9.84.2.4 out

```
template<typename Network = UNetwork<>>
std::ostream* LinkPred::PerfeEvalExpDescp< Network >::out = &std::cout
```

Output file.

### 9.84.2.5 ratioEnd

```
template<typename Network = UNetwork<>>
double LinkPred::PerfeEvalExpDescp< Network >::ratioEnd = 0.1
```

End value of the ratio of removed edges. This is adjusted if keepConnected is set to true.

### 9.84.2.6 ratioStart

```
template<typename Network = UNetwork<>>
double LinkPred::PerfeEvalExpDescp< Network >::ratioStart = 0.1
```

Start value of the ratio of removed edges.

#### 9.84.2.7 ratioStep

```
template<typename Network = UNetwork<>>
double LinkPred::PerfEvalExpDescp< Network >::ratioStep = 0.1
```

Step size of the ratio of removed edges.

#### 9.84.2.8 refNet

```
template<typename Network = UNetwork<>>
std::shared_ptr<Network> LinkPred::PerfEvalExpDescp< Network >::refNet
```

Reference network.

#### 9.84.2.9 seed

```
template<typename Network = UNetwork<>>
long int LinkPred::PerfEvalExpDescp< Network >::seed = 0
```

Seed for the random number generator.

#### 9.84.2.10 timingEnabled

```
template<typename Network = UNetwork<>>
bool LinkPred::PerfEvalExpDescp< Network >::timingEnabled = false
```

Enable/disable timing.

#### 9.84.2.11 tnRatio

```
template<typename Network = UNetwork<>>
double LinkPred::PerfEvalExpDescp< Network >::tnRatio = 1
```

Ratio of true negatives used in the test set.

The documentation for this struct was generated from the following file:

- [include/linkpred/perf/perfevaluator.hpp](#)

## 9.85 LinkPred::PerfEvalExp< Network, TestDataT, LPredictorT, PredResultsT, PerfMeasureT > Class Template Reference

Performance evaluation experiment.

```
#include <perfevaluator.hpp>
```

## Public Member Functions

- [PerfEvalExp](#) ([PerfeEvalExpDescp](#)< Network > const &ped, std::shared\_ptr< [PEFactory](#)< Network, LPredictorT, TestDataT, PerfMeasureT >> const &factory)
- [PerfEvalExp](#) ([PerfEvalExp](#) const &that)=default
- [PerfEvalExp](#) & [operator=](#) ([PerfEvalExp](#) const &that)=default
- [PerfEvalExp](#) ([PerfEvalExp](#) &&that)=default
- [PerfEvalExp](#) & [operator=](#) ([PerfEvalExp](#) &&that)=default
- void [run](#) ()
- void [runNoTiming](#) ()
- void [runTiming](#) ()
- auto [resultsBegin](#) () const
- auto [resultsEnd](#) () const
- const std::shared\_ptr< [PEFactory](#)< Network, LPredictorT, TestDataT, PerfMeasureT >> & [getFactory](#) () const
- int [getOutPrec](#) () const
- void [setOutPrec](#) (int outPrec)
- const [PerfeEvalExpDescp](#)< Network > & [getPed](#) () const
- virtual [~PerfEvalExp](#) ()=default

### 9.85.1 Detailed Description

```
template<typename Network = UNetwork<>, typename TestDataT = TestData<>, typename LPredictorT = ULPredictor<>,
typename PredResultsT = PredResults<TestDataT, LPredictorT>, typename PerfMeasureT = PerfMeasure<PredResultsT>>
class LinkPred::PerfEvalExp< Network, TestDataT, LPredictorT, PredResultsT, PerfMeasureT >
```

Performance evaluation experiment.

#### Template Parameters

|                     |                               |
|---------------------|-------------------------------|
| <i>Network</i>      | The network data type.        |
| <i>TestDataT</i>    | The test data type.           |
| <i>PredResultsT</i> | The prediction results type.  |
| <i>PerfMeasureT</i> | The performance measure type. |

### 9.85.2 Constructor & Destructor Documentation

#### 9.85.2.1 PerfEvalExp() [1/3]

```
template<typename Network = UNetwork<>, typename TestDataT = TestData<>, typename LPredictorT = ULPredictor<>,
typename PredResultsT = PredResults<TestDataT, LPredictorT>, typename PerfMeasureT = PerfMeasure<PredResultsT>>
LinkPred::PerfEvalExp< Network, TestDataT, LPredictorT, PredResultsT, PerfMeasureT >::PerfEvalExp
(
    PerfeEvalExpDescp< Network > const & ped,
    std::shared_ptr< PEFactory< Network, LPredictorT, TestDataT, PerfMeasureT >>
const & factory ) [inline]
```

Constructor.



## Parameters

|                |                                                                  |
|----------------|------------------------------------------------------------------|
| <i>ped</i>     | The experiment description.                                      |
| <i>factory</i> | Factory bject to create link predictor and performance measures. |

## 9.85.2.2 PerfEvalExp() [2/3]

```
template<typename Network = UNetwork<>, typename TestDataT = TestData<>, typename LPredictorT
= ULPredictor<>, typename PredResultsT = PredResults<TestDataT, LPredictorT>, typename Perf↵
MeasureT = PerfMeasure<PredResultsT>>
LinkPred::PerfEvalExp< Network, TestDataT, LPredictorT, PredResultsT, PerfMeasureT >::PerfEvalExp
(
    PerfEvalExp< Network, TestDataT, LPredictorT, PredResultsT, PerfMeasureT > const
& that ) [default]
```

Copy constructor.

## Parameters

|             |                     |
|-------------|---------------------|
| <i>that</i> | The object to copy. |
|-------------|---------------------|

## 9.85.2.3 PerfEvalExp() [3/3]

```
template<typename Network = UNetwork<>, typename TestDataT = TestData<>, typename LPredictorT
= ULPredictor<>, typename PredResultsT = PredResults<TestDataT, LPredictorT>, typename Perf↵
MeasureT = PerfMeasure<PredResultsT>>
LinkPred::PerfEvalExp< Network, TestDataT, LPredictorT, PredResultsT, PerfMeasureT >::PerfEvalExp
(
    PerfEvalExp< Network, TestDataT, LPredictorT, PredResultsT, PerfMeasureT > &&
that ) [default]
```

Move constructor.

## Parameters

|             |                     |
|-------------|---------------------|
| <i>that</i> | The object to move. |
|-------------|---------------------|

## 9.85.2.4 ~PerfEvalExp()

```
template<typename Network = UNetwork<>, typename TestDataT = TestData<>, typename LPredictorT
= ULPredictor<>, typename PredResultsT = PredResults<TestDataT, LPredictorT>, typename Perf↵
MeasureT = PerfMeasure<PredResultsT>>
```

```
virtual LinkPred::PerfEvalExp< Network, TestDataT, LPredictorT, PredResultsT, PerfMeasureT >↵
::~PerfEvalExp ( ) [virtual], [default]
```

Destructor.

### 9.85.3 Member Function Documentation

#### 9.85.3.1 [getFactory\(\)](#)

```
template<typename Network = UNetwork<>, typename TestDataT = TestData<>, typename LPredictorT
= ULPredictor<>, typename PredResultsT = PredResults<TestDataT, LPredictorT>, typename Perf↵
MeasureT = PerfMeasure<PredResultsT>>
const std::shared_ptr< PEFactory<Network, LPredictorT, TestDataT, PerfMeasureT> >& LinkPred::PerfEvalExp<
Network, TestDataT, LPredictorT, PredResultsT, PerfMeasureT >::getFactory ( ) const [inline]
```

##### Returns

The factory.

#### 9.85.3.2 [getOutPrec\(\)](#)

```
template<typename Network = UNetwork<>, typename TestDataT = TestData<>, typename LPredictorT
= ULPredictor<>, typename PredResultsT = PredResults<TestDataT, LPredictorT>, typename Perf↵
MeasureT = PerfMeasure<PredResultsT>>
int LinkPred::PerfEvalExp< Network, TestDataT, LPredictorT, PredResultsT, PerfMeasureT >↵
::getOutPrec ( ) const [inline]
```

##### Returns

Output precision (for double).

#### 9.85.3.3 [getPed\(\)](#)

```
template<typename Network = UNetwork<>, typename TestDataT = TestData<>, typename LPredictorT
= ULPredictor<>, typename PredResultsT = PredResults<TestDataT, LPredictorT>, typename Perf↵
MeasureT = PerfMeasure<PredResultsT>>
const PerfEvalExpDescp<Network>& LinkPred::PerfEvalExp< Network, TestDataT, LPredictorT,
PredResultsT, PerfMeasureT >::getPed ( ) const [inline]
```

##### Returns

The experience descriptor.

### 9.85.3.4 operator=() [1/2]

```
template<typename Network = UNetwork<>, typename TestDataT = TestData<>, typename LPredictorT = ULPredictor<>, typename PredResultsT = PredResults<TestDataT, LPredictorT>, typename PerfMeasureT = PerfMeasure<PredResultsT>>
PerfEvalExp& LinkPred::PerfEvalExp< Network, TestDataT, LPredictorT, PredResultsT, PerfMeasureT >::operator= (
    PerfEvalExp< Network, TestDataT, LPredictorT, PredResultsT, PerfMeasureT > &&
    that ) [default]
```

Move assignment operator.

#### Parameters

|             |                     |
|-------------|---------------------|
| <i>that</i> | The object to move. |
|-------------|---------------------|

### 9.85.3.5 operator=() [2/2]

```
template<typename Network = UNetwork<>, typename TestDataT = TestData<>, typename LPredictorT = ULPredictor<>, typename PredResultsT = PredResults<TestDataT, LPredictorT>, typename PerfMeasureT = PerfMeasure<PredResultsT>>
PerfEvalExp& LinkPred::PerfEvalExp< Network, TestDataT, LPredictorT, PredResultsT, PerfMeasureT >::operator= (
    PerfEvalExp< Network, TestDataT, LPredictorT, PredResultsT, PerfMeasureT > const
    & that ) [default]
```

Copy assignment operator.

#### Parameters

|             |                     |
|-------------|---------------------|
| <i>that</i> | The object to copy. |
|-------------|---------------------|

### 9.85.3.6 resultsBegin()

```
template<typename Network = UNetwork<>, typename TestDataT = TestData<>, typename LPredictorT = ULPredictor<>, typename PredResultsT = PredResults<TestDataT, LPredictorT>, typename PerfMeasureT = PerfMeasure<PredResultsT>>
auto LinkPred::PerfEvalExp< Network, TestDataT, LPredictorT, PredResultsT, PerfMeasureT >::resultsBegin ( ) const [inline]
```

#### Returns

An iterator to the first performance result.

### 9.85.3.7 resultsEnd()

```
template<typename Network = UNetwork<>, typename TestDatumT = TestDatum<>, typename LPredictorT
= ULPredictor<>, typename PredResultsT = PredResults<TestDatumT, LPredictorT>, typename Perf↵
MeasureT = PerfMeasure<PredResultsT>>
auto LinkPred::PerfEvalExp< Network, TestDatumT, LPredictorT, PredResultsT, PerfMeasureT >↵
::resultsEnd ( ) const [inline]
```

#### Returns

An iterator to one-past-the-last first performance result.

### 9.85.3.8 run()

```
template<typename Network = UNetwork<>, typename TestDatumT = TestDatum<>, typename LPredictorT
= ULPredictor<>, typename PredResultsT = PredResults<TestDatumT, LPredictorT>, typename Perf↵
MeasureT = PerfMeasure<PredResultsT>>
void LinkPred::PerfEvalExp< Network, TestDatumT, LPredictorT, PredResultsT, PerfMeasureT >↵
::run
( )
```

Run the performance evaluation experiment.

### 9.85.3.9 runNoTiming()

```
template<typename Network = UNetwork<>, typename TestDatumT = TestDatum<>, typename LPredictorT
= ULPredictor<>, typename PredResultsT = PredResults<TestDatumT, LPredictorT>, typename Perf↵
MeasureT = PerfMeasure<PredResultsT>>
void LinkPred::PerfEvalExp< Network, TestDatumT, LPredictorT, PredResultsT, PerfMeasureT >↵
::runNoTiming
( )
```

Runs the performance evaluation without timing.

### 9.85.3.10 runTiming()

```
template<typename Network = UNetwork<>, typename TestDatumT = TestDatum<>, typename LPredictorT
= ULPredictor<>, typename PredResultsT = PredResults<TestDatumT, LPredictorT>, typename Perf↵
MeasureT = PerfMeasure<PredResultsT>>
void LinkPred::PerfEvalExp< Network, TestDatumT, LPredictorT, PredResultsT, PerfMeasureT >↵
::runTiming
( )
```

Runs the performance evaluation with timing.

### 9.85.3.11 setOutPrec()

```
template<typename Network = UNetwork<>, typename TestDatumT = TestDatum<>, typename LPredictorT
= ULPredictor<>, typename PredResultsT = PredResults<TestDatumT, LPredictorT>, typename Perf↵
MeasureT = PerfMeasure<PredResultsT>>
void LinkPred::PerfEvalExp< Network, TestDatumT, LPredictorT, PredResultsT, PerfMeasureT >↵
::setOutPrec
(
    int outPrec ) [inline]
```

## Parameters

|                |                                |
|----------------|--------------------------------|
| <i>outPrec</i> | Output precision (for double). |
|----------------|--------------------------------|

The documentation for this class was generated from the following file:

- [include/linkpred/perf/perfevaluator.hpp](#)

## 9.86 LinkPred::PerfEvaluator< TestDataT, LPredictorT, PredResultsT, PerfMeasureT > Class Template Reference

Performance evaluator.

```
#include <perfevaluator.hpp>
```

### Public Member Functions

- [PerfEvaluator](#) (TestDataT testData)
- [PerfEvaluator](#) ([PerfEvaluator](#) const &that)=default
- [PerfEvaluator](#) & [operator=](#) ([PerfEvaluator](#) const &that)=default
- [PerfEvaluator](#) ([PerfEvaluator](#) &&that)=default
- [PerfEvaluator](#) & [operator=](#) ([PerfEvaluator](#) &&that)=default
- [std::size\\_t addPredictor](#) (std::shared\_ptr< LPredictorT > predictor)
- [std::size\\_t addPerfMeasure](#) (std::shared\_ptr< PerfMeasureT > measure)
- [std::size\\_t getNbPredictors](#) () const
- [std::size\\_t getNbPerfMeasures](#) () const
- [auto getPredictor](#) (std::size\_t i) const
- [void eval](#) ()
- [void evalNoTiming](#) ()
- [void evalTiming](#) ()
- [bool isTimingEnabled](#) () const
- [void setTimingEnabled](#) (bool timingEnabled)
- [auto resultsBegin](#) () const
- [auto resultsEnd](#) () const
- [virtual ~PerfEvaluator](#) ()=default

### 9.86.1 Detailed Description

```
template<typename TestDataT = TestData<>, typename LPredictorT = ULPredictor<>, typename PredResultsT = Pred<
Results<TestDataT, LPredictorT>, typename PerfMeasureT = PerfMeasure<PredResultsT>>>
class LinkPred::PerfEvaluator< TestDataT, LPredictorT, PredResultsT, PerfMeasureT >
```

Performance evaluator.

#### Template Parameters

|                     |                               |
|---------------------|-------------------------------|
| <i>TestDataT</i>    | The test data type.           |
| <i>PredResultsT</i> | The prediction results type.  |
| <i>PerfMeasureT</i> | The performance measure type. |

## 9.86.2 Constructor & Destructor Documentation

### 9.86.2.1 PerfEvaluator() [1/3]

```
template<typename TestDataT = TestData<>, typename LPredictorT = ULPredictor<>, typename
PredResultsT = PredResults<TestDataT, LPredictorT>, typename PerfMeasureT = PerfMeasure<↔
PredResultsT>>>
LinkPred::PerfEvaluator< TestDataT, LPredictorT, PredResultsT, PerfMeasureT >::PerfEvaluator (
    TestDataT testData ) [inline]
```

Constructor.

Parameters

|                 |                |
|-----------------|----------------|
| <i>testData</i> | The test data. |
|-----------------|----------------|

### 9.86.2.2 PerfEvaluator() [2/3]

```
template<typename TestDataT = TestData<>, typename LPredictorT = ULPredictor<>, typename
PredResultsT = PredResults<TestDataT, LPredictorT>, typename PerfMeasureT = PerfMeasure<↔
PredResultsT>>>
LinkPred::PerfEvaluator< TestDataT, LPredictorT, PredResultsT, PerfMeasureT >::PerfEvaluator (
    PerfEvaluator< TestDataT, LPredictorT, PredResultsT, PerfMeasureT > const & that
) [default]
```

Copy constructor.

Parameters

|             |                     |
|-------------|---------------------|
| <i>that</i> | The object to copy. |
|-------------|---------------------|

### 9.86.2.3 PerfEvaluator() [3/3]

```
template<typename TestDataT = TestData<>, typename LPredictorT = ULPredictor<>, typename
PredResultsT = PredResults<TestDataT, LPredictorT>, typename PerfMeasureT = PerfMeasure<↔
PredResultsT>>>
LinkPred::PerfEvaluator< TestDataT, LPredictorT, PredResultsT, PerfMeasureT >::PerfEvaluator (
    PerfEvaluator< TestDataT, LPredictorT, PredResultsT, PerfMeasureT > && that )
[default]
```

Move constructor.

## Parameters

|             |                     |
|-------------|---------------------|
| <i>that</i> | The object to move. |
|-------------|---------------------|

## 9.86.2.4 ~PerfEvaluator()

```
template<typename TestDataT = TestData<>, typename LPredictorT = ULPredictor<>, typename
PredResultsT = PredResults<TestDataT, LPredictorT>, typename PerfMeasureT = PerfMeasure<↔
PredResultsT>>
virtual LinkPred::PerfEvaluator< TestDataT, LPredictorT, PredResultsT, PerfMeasureT >::~~PerfEvaluator
( ) [virtual], [default]
```

Destructor.

## 9.86.3 Member Function Documentation

## 9.86.3.1 addPerfMeasure()

```
template<typename TestDataT = TestData<>, typename LPredictorT = ULPredictor<>, typename
PredResultsT = PredResults<TestDataT, LPredictorT>, typename PerfMeasureT = PerfMeasure<↔
PredResultsT>>
std::size_t LinkPred::PerfEvaluator< TestDataT, LPredictorT, PredResultsT, PerfMeasureT >↔
::addPerfMeasure (
    std::shared_ptr< PerfMeasureT > measure ) [inline]
```

Add a performance measure.

## Parameters

|                |                         |
|----------------|-------------------------|
| <i>measure</i> | A performanmce measure. |
|----------------|-------------------------|

## Returns

An ID.

## 9.86.3.2 addPredictor()

```
template<typename TestDataT = TestData<>, typename LPredictorT = ULPredictor<>, typename
PredResultsT = PredResults<TestDataT, LPredictorT>, typename PerfMeasureT = PerfMeasure<↔
PredResultsT>>
```

```
std::size_t LinkPred::PerfEvaluator< TestDataT, LPredictorT, PredResultsT, PerfMeasureT >←  
::addPredictor (   
    std::shared_ptr< LPredictorT > predictor ) [inline]
```

Add a predictor.



## Parameters

|                  |                   |
|------------------|-------------------|
| <i>predictor</i> | A link predictor. |
|------------------|-------------------|

## Returns

An ID.

**9.86.3.3 eval()**

```
template<typename TestDataT = TestData<>, typename LPredictorT = ULPredictor<>, typename
PredResultsT = PredResults<TestDataT, LPredictorT>, typename PerfMeasureT = PerfMeasure<↳
PredResultsT>>
void LinkPred::PerfEvaluator< TestDataT, LPredictorT, PredResultsT, PerfMeasureT >::eval ( )
[inline]
```

Run the performance evaluation.

**9.86.3.4 evalNoTiming()**

```
template<typename TestDataT = TestData<>, typename LPredictorT = ULPredictor<>, typename
PredResultsT = PredResults<TestDataT, LPredictorT>, typename PerfMeasureT = PerfMeasure<↳
PredResultsT>>
void LinkPred::PerfEvaluator< TestDataT, LPredictorT, PredResultsT, PerfMeasureT >::evalNo↳
Timing ( )
```

Runs the performance evaluation without timing.

**9.86.3.5 evalTiming()**

```
template<typename TestDataT = TestData<>, typename LPredictorT = ULPredictor<>, typename
PredResultsT = PredResults<TestDataT, LPredictorT>, typename PerfMeasureT = PerfMeasure<↳
PredResultsT>>
void LinkPred::PerfEvaluator< TestDataT, LPredictorT, PredResultsT, PerfMeasureT >::evalTiming
( )
```

Runs the performance evaluation with timing.

**9.86.3.6 getNbPerfMeasures()**

```
template<typename TestDataT = TestData<>, typename LPredictorT = ULPredictor<>, typename
PredResultsT = PredResults<TestDataT, LPredictorT>, typename PerfMeasureT = PerfMeasure<↳
PredResultsT>>
std::size_t LinkPred::PerfEvaluator< TestDataT, LPredictorT, PredResultsT, PerfMeasureT >↳
::getNbPerfMeasures ( ) const [inline]
```

## Returns

The number of performance measures.

### 9.86.3.7 getNbPredictors()

```
template<typename TestDataT = TestData<>, typename LPredictorT = ULPredictor<>, typename
PredResultsT = PredResults<TestDataT, LPredictorT>, typename PerfMeasureT = PerfMeasure<↵
PredResultsT>>
std::size_t LinkPred::PerfEvaluator< TestDataT, LPredictorT, PredResultsT, PerfMeasureT >↵
::getNbPredictors ( ) const [inline]
```

#### Returns

The number of predictors.

### 9.86.3.8 getPredictor()

```
template<typename TestDataT = TestData<>, typename LPredictorT = ULPredictor<>, typename
PredResultsT = PredResults<TestDataT, LPredictorT>, typename PerfMeasureT = PerfMeasure<↵
PredResultsT>>
auto LinkPred::PerfEvaluator< TestDataT, LPredictorT, PredResultsT, PerfMeasureT >::get↵
Predictor (
    std::size_t i ) const [inline]
```

#### Parameters

|          |                         |
|----------|-------------------------|
| <i>i</i> | Index of the predictor. |
|----------|-------------------------|

#### Returns

The predictor of index *i*.

### 9.86.3.9 isTimingEnabled()

```
template<typename TestDataT = TestData<>, typename LPredictorT = ULPredictor<>, typename
PredResultsT = PredResults<TestDataT, LPredictorT>, typename PerfMeasureT = PerfMeasure<↵
PredResultsT>>
bool LinkPred::PerfEvaluator< TestDataT, LPredictorT, PredResultsT, PerfMeasureT >::isTiming↵
Enabled ( ) const [inline]
```

#### Returns

Whether timing is enabled.

### 9.86.3.10 operator=() [1/2]

```
template<typename TestDataT = TestData<>, typename LPredictorT = ULPredictor<>, typename
PredResultsT = PredResults<TestDataT, LPredictorT>, typename PerfMeasureT = PerfMeasure<↳
PredResultsT>>
PerfEvaluator& LinkPred::PerfEvaluator< TestDataT, LPredictorT, PredResultsT, PerfMeasureT >↳
::operator= (
    PerfEvaluator< TestDataT, LPredictorT, PredResultsT, PerfMeasureT > && that )
[default]
```

Move assignment operator.

#### Parameters

|             |                     |
|-------------|---------------------|
| <i>that</i> | The object to move. |
|-------------|---------------------|

### 9.86.3.11 operator=() [2/2]

```
template<typename TestDataT = TestData<>, typename LPredictorT = ULPredictor<>, typename
PredResultsT = PredResults<TestDataT, LPredictorT>, typename PerfMeasureT = PerfMeasure<↳
PredResultsT>>
PerfEvaluator& LinkPred::PerfEvaluator< TestDataT, LPredictorT, PredResultsT, PerfMeasureT >↳
::operator= (
    PerfEvaluator< TestDataT, LPredictorT, PredResultsT, PerfMeasureT > const & that
) [default]
```

Copy assignment operator.

#### Parameters

|             |                     |
|-------------|---------------------|
| <i>that</i> | The object to copy. |
|-------------|---------------------|

### 9.86.3.12 resultsBegin()

```
template<typename TestDataT = TestData<>, typename LPredictorT = ULPredictor<>, typename
PredResultsT = PredResults<TestDataT, LPredictorT>, typename PerfMeasureT = PerfMeasure<↳
PredResultsT>>
auto LinkPred::PerfEvaluator< TestDataT, LPredictorT, PredResultsT, PerfMeasureT >::results↳
Begin ( ) const [inline]
```

#### Returns

An iterator to the first performance result.

### 9.86.3.13 resultsEnd()

```
template<typename TestDatumT = TestDatum<>, typename LPredictorT = ULPredictor<>, typename
PredResultsT = PredResults<TestDatumT, LPredictorT>, typename PerfMeasureT = PerfMeasure<↔
PredResultsT>>>
auto LinkPred::PerfEvaluator< TestDatumT, LPredictorT, PredResultsT, PerfMeasureT >::resultsEnd
( ) const [inline]
```

#### Returns

An iterator to one-past-the-last first performance result.

### 9.86.3.14 setTimingEnabled()

```
template<typename TestDatumT = TestDatum<>, typename LPredictorT = ULPredictor<>, typename
PredResultsT = PredResults<TestDatumT, LPredictorT>, typename PerfMeasureT = PerfMeasure<↔
PredResultsT>>>
void LinkPred::PerfEvaluator< TestDatumT, LPredictorT, PredResultsT, PerfMeasureT >::set↔
TimingEnabled (
    bool timingEnabled ) [inline]
```

Enable/disable timing.

#### Parameters

|                      |                |
|----------------------|----------------|
| <i>timingEnabled</i> | The new value. |
|----------------------|----------------|

The documentation for this class was generated from the following file:

- [include/linkpred/perf/perfevaluator.hpp](#)

## 9.87 LinkPred::PerfMeasure< PredResultsT > Class Template Reference

Abstract performance measure.

```
#include <perfmeasure.hpp>
```

### Public Types

- using [ScoresItT](#) = typename PredResultsT::ScoresItT

## Public Member Functions

- [PerfMeasure](#) ()=default
- [PerfMeasure](#) (std::string const &name)
- [PerfMeasure](#) ([PerfMeasure](#) const &that)=default
- [PerfMeasure](#) & [operator=](#) ([PerfMeasure](#) const &that)=default
- [PerfMeasure](#) ([PerfMeasure](#) &&that)=default
- [PerfMeasure](#) & [operator=](#) ([PerfMeasure](#) &&that)=default
- const std::string & [getName](#) () const
- void [setName](#) (std::string const &name)
- virtual bool [requiresPos](#) () const
- virtual bool [requiresNeg](#) () const
- virtual bool [requiresShuffling](#) () const
- virtual void [eval](#) (std::shared\_ptr< PredResultsT > &predResults, [PerfResults](#) &results)=0
- virtual void [eval](#) ([ScoresItT](#) posScoresBegin, [ScoresItT](#) posScoresEnd, [ScoresItT](#) negScoresBegin, [ScoresItT](#) negScoresEnd, [SortOrder](#) &posSortOrder, [SortOrder](#) &negSortOrder, [PerfResults](#) &results)=0
- virtual [~PerfMeasure](#) ()=default

### 9.87.1 Detailed Description

```
template<typename PredResultsT = PredResults<>>
class LinkPred::PerfMeasure< PredResultsT >
```

Abstract performance measure.

Template Parameters

|                     |                              |
|---------------------|------------------------------|
| <i>PredResultsT</i> | The prediction results type. |
|---------------------|------------------------------|

### 9.87.2 Member Typedef Documentation

#### 9.87.2.1 ScoresItT

```
template<typename PredResultsT = PredResults<>>
using LinkPred::PerfMeasure< PredResultsT >::ScoresItT = typename PredResultsT::ScoresItT
```

Scores iterator type.

### 9.87.3 Constructor & Destructor Documentation

### 9.87.3.1 PerfMeasure() [1/4]

```
template<typename PredResultsT = PredResults<>>
LinkPred::PerfMeasure< PredResultsT >::PerfMeasure ( ) [default]
```

Constructor.

### 9.87.3.2 PerfMeasure() [2/4]

```
template<typename PredResultsT = PredResults<>>
LinkPred::PerfMeasure< PredResultsT >::PerfMeasure (
    std::string const & name ) [inline]
```

Constructor.

#### Parameters

|             |                                      |
|-------------|--------------------------------------|
| <i>name</i> | The name of the performance measure. |
|-------------|--------------------------------------|

### 9.87.3.3 PerfMeasure() [3/4]

```
template<typename PredResultsT = PredResults<>>
LinkPred::PerfMeasure< PredResultsT >::PerfMeasure (
    PerfMeasure< PredResultsT > const & that ) [default]
```

Copy constructor.

#### Parameters

|             |                     |
|-------------|---------------------|
| <i>that</i> | The object to copy. |
|-------------|---------------------|

### 9.87.3.4 PerfMeasure() [4/4]

```
template<typename PredResultsT = PredResults<>>
LinkPred::PerfMeasure< PredResultsT >::PerfMeasure (
    PerfMeasure< PredResultsT > && that ) [default]
```

Move constructor.

#### Parameters

|             |                     |
|-------------|---------------------|
| <i>that</i> | The object to move. |
|-------------|---------------------|

### 9.87.3.5 ~PerfMeasure()

```
template<typename PredResultsT = PredResults<>>
virtual LinkPred::PerfMeasure< PredResultsT >::~~PerfMeasure ( ) [virtual], [default]
```

Destructor.

## 9.87.4 Member Function Documentation

### 9.87.4.1 eval() [1/2]

```
template<typename PredResultsT = PredResults<>>
virtual void LinkPred::PerfMeasure< PredResultsT >::eval (
    ScoresItT posScoresBegin,
    ScoresItT posScoresEnd,
    ScoresItT negScoresBegin,
    ScoresItT negScoresEnd,
    SortOrder & posSortOrder,
    SortOrder & negSortOrder,
    PerfResults & results ) [pure virtual]
```

Computes the performance measure.

#### Parameters

|                       |                                                                           |
|-----------------------|---------------------------------------------------------------------------|
| <i>posScoresBegin</i> | Iterator to the first positive score.                                     |
| <i>posScoresEnd</i>   | Iterator to one-past-the-last positive score.                             |
| <i>negScoresBegin</i> | Iterator to the first negative score.                                     |
| <i>negScoresEnd</i>   | Iterator to one-past-the-last negative score.                             |
| <i>posSortOrder</i>   | The sorting order of positive scores. This may be modified by the method. |
| <i>negSortOrder</i>   | The sorting order of negative scores. This may be modified by the method. |
| <i>results</i>        | To write results.                                                         |

Implemented in [LinkPred::PerfCurve< PredResults<>> >](#).

### 9.87.4.2 eval() [2/2]

```
template<typename PredResultsT = PredResults<>>
virtual void LinkPred::PerfMeasure< PredResultsT >::eval (
    std::shared_ptr< PredResultsT > & predResults,
    PerfResults & results ) [pure virtual]
```

Computes the performance measure.

## Parameters

|                    |                         |
|--------------------|-------------------------|
| <i>predResults</i> | The prediction results. |
| <i>results</i>     | To write results.       |

Implemented in [LinkPred::PerfCurve< PredResults<> >](#).

### 9.87.4.3 getName()

```
template<typename PredResultsT = PredResults<>>
const std::string& LinkPred::PerfMeasure< PredResultsT >::getName ( ) const [inline]
```

## Returns

The name of the performance measure.

### 9.87.4.4 operator=() [1/2]

```
template<typename PredResultsT = PredResults<>>
PerfMeasure& LinkPred::PerfMeasure< PredResultsT >::operator= (
    PerfMeasure< PredResultsT > && that ) [default]
```

Move assignment operator.

## Parameters

|             |                     |
|-------------|---------------------|
| <i>that</i> | The object to move. |
|-------------|---------------------|

### 9.87.4.5 operator=() [2/2]

```
template<typename PredResultsT = PredResults<>>
PerfMeasure& LinkPred::PerfMeasure< PredResultsT >::operator= (
    PerfMeasure< PredResultsT > const & that ) [default]
```

Copy assignment operator.

## Parameters

|             |                     |
|-------------|---------------------|
| <i>that</i> | The object to copy. |
|-------------|---------------------|



#### 9.87.4.6 requiresNeg()

```
template<typename PredResultsT = PredResults<>>
virtual bool LinkPred::PerfMeasure< PredResultsT >::requiresNeg ( ) const [inline], [virtual]
```

##### Returns

Whether the performance measure requires the generation of negative set. The default value is true.

#### 9.87.4.7 requiresPos()

```
template<typename PredResultsT = PredResults<>>
virtual bool LinkPred::PerfMeasure< PredResultsT >::requiresPos ( ) const [inline], [virtual]
```

##### Returns

Whether the performance measure requires the generation of positive set. The default value is true.

#### 9.87.4.8 requiresShuffling()

```
template<typename PredResultsT = PredResults<>>
virtual bool LinkPred::PerfMeasure< PredResultsT >::requiresShuffling ( ) const [inline],
[virtual]
```

##### Returns

Whether the performance measure requires network shuffling.

#### 9.87.4.9 setName()

```
template<typename PredResultsT = PredResults<>>
void LinkPred::PerfMeasure< PredResultsT >::setName (
    std::string const & name ) [inline]
```

##### Parameters

|             |                                      |
|-------------|--------------------------------------|
| <i>name</i> | The name of the performance measure. |
|-------------|--------------------------------------|

The documentation for this class was generated from the following file:

- include/linkpred/perf/perfmeasure.hpp

## 9.88 LinkPred::Simp::PerfRes Struct Reference

A structure to store performance results.

```
#include <perfres.hpp>
```

### Public Attributes

- `std::string` [name](#)
- `double` [res](#)

### 9.88.1 Detailed Description

A structure to store performance results.

### 9.88.2 Member Data Documentation

#### 9.88.2.1 name

```
std::string LinkPred::Simp::PerfRes::name
```

Concatenation of the name of the performance mneasure and that of the predictor.

#### 9.88.2.2 res

```
double LinkPred::Simp::PerfRes::res
```

The result.

The documentation for this struct was generated from the following file:

- `include/linkpred/simp/perfres.hpp`

## 9.89 LinkPred::PR< PredResultsT > Class Template Reference

The precision recall curve.

```
#include <perfmeasure.hpp>
```

Inheritance diagram for LinkPred::PR< PredResultsT >:

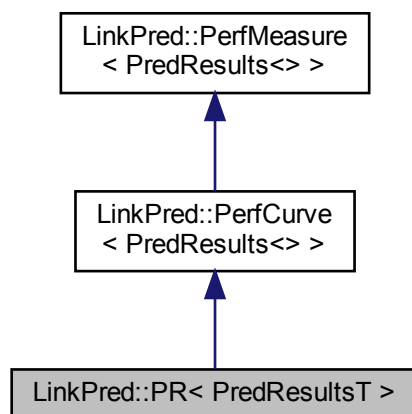

Collaboration diagram for LinkPred::PR< PredResultsT >:

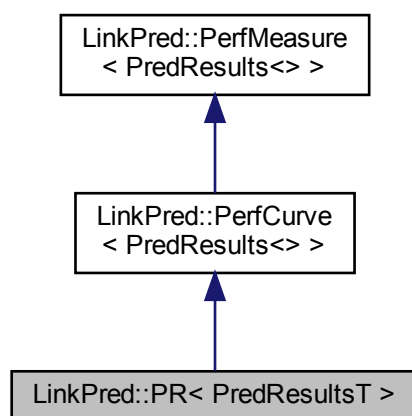

### Public Types

- enum `InterpolMethod` { `LIN`, `DGI` }  
*Interpolation methods used for the computation of the PR-AUC.*
- using `ScoresItT` = typename `PerfMeasure< PredResultsT >::ScoresItT`

## Public Member Functions

- [PR](#) ()
- [PR](#) (std::string name)
- [PR](#) ([PR](#) const &that)=default
- [PR](#) & [operator=](#) ([PR](#) const &that)=default
- [PR](#) ([PR](#) &&that)=default
- [PR](#) & [operator=](#) ([PR](#) &&that)=default
- virtual void [eval](#) (std::shared\_ptr< PredResultsT > &predResults, [PerfResults](#) &results)
- virtual void [eval](#) ([ScoresItT](#) posScoresBegin, [ScoresItT](#) posScoresEnd, [ScoresItT](#) negScoresBegin, [ScoresItT](#) negScoresEnd, [SortOrder](#) &posSortOrder, [SortOrder](#) &negSortOrder, [PerfResults](#) &results)
- virtual std::vector< std::pair< double, double > > [getCurve](#) (std::shared\_ptr< PredResultsT > &predResults)
- virtual std::vector< std::pair< double, double > > [getCurve](#) ([ScoresItT](#) posScoresBegin, [ScoresItT](#) posScoresEnd, [ScoresItT](#) negScoresBegin, [ScoresItT](#) negScoresEnd, [SortOrder](#) &posSortOrder, [SortOrder](#) &negSortOrder)
- [InterpolMethod](#) [getInterpolMethod](#) () const
- void [setInterpolMethod](#) ([InterpolMethod](#) interpolMethod)
- virtual ~[PR](#) ()=default

## Static Public Member Functions

- template<typename CountItT >  
static double [getPRAucLIN](#) (CountItT tpsBegin, CountItT tpsEnd, CountItT fpsBegin, CountItT fpsEnd, std::size\_t P, bool bcz, bool parallel=false)
- template<typename CountItT >  
static double [getPRAucDGI](#) (CountItT tpsBegin, CountItT tpsEnd, CountItT fpsBegin, CountItT fpsEnd, std::size\_t P, bool bcz, bool parallel=false)
- template<typename ScoresItT >  
static double [getPRAuc](#) ([ScoresItT](#) posScoresBegin, [ScoresItT](#) posScoresEnd, [ScoresItT](#) negScoresBegin, [ScoresItT](#) negScoresEnd, [InterpolMethod](#) interpolMethod, bool parallel=false)
- template<typename ScoresItT >  
static std::vector< double > [getThresholds](#) ([ScoresItT](#) posScoresBegin, [ScoresItT](#) posScoresEnd, [ScoresItT](#) negScoresBegin, [ScoresItT](#) negScoresEnd)
- template<typename ScoresItT >  
static std::vector< std::pair< double, double > > [getPRCurve](#) ([ScoresItT](#) posScoresBegin, [ScoresItT](#) posScoresEnd, [ScoresItT](#) negScoresBegin, [ScoresItT](#) negScoresEnd, bool parallel=false)

### 9.89.1 Detailed Description

```
template<typename PredResultsT = PredResults<>>
class LinkPred::PR< PredResultsT >
```

The precision recall curve.

#### Template Parameters

|                     |                              |
|---------------------|------------------------------|
| <i>PredResultsT</i> | The prediction results type. |
|---------------------|------------------------------|

## 9.89.2 Member Typedef Documentation

### 9.89.2.1 ScoresItT

```
template<typename PredResultsT = PredResults<>>
using LinkPred::PR< PredResultsT >::ScoresItT = typename PerfMeasure<PredResultsT>::ScoresItT
```

Scores iterator type.

## 9.89.3 Member Enumeration Documentation

### 9.89.3.1 InterpolMethod

```
template<typename PredResultsT = PredResults<>>
enum LinkPred::PR::InterpolMethod
```

Interpolation methods used for the computation of the PR-AUC.

< The name of the performance measure.

Enumerator

|     |                                          |
|-----|------------------------------------------|
| LIN | Linear interpolation (Trapezoidal rule). |
| DGI | Davis-Goadrich nonlinear interpolation.  |

## 9.89.4 Constructor & Destructor Documentation

### 9.89.4.1 PR() [1/4]

```
template<typename PredResultsT = PredResults<>>
LinkPred::PR< PredResultsT >::PR ( ) [inline]
```

Constructor.

### 9.89.4.2 PR() [2/4]

```
template<typename PredResultsT = PredResults<>>
LinkPred::PR< PredResultsT >::PR (
    std::string name ) [inline]
```

Constructor.

## Parameters

|             |                                      |
|-------------|--------------------------------------|
| <i>name</i> | The name of the performance measure. |
|-------------|--------------------------------------|

**9.89.4.3 PR()** [3/4]

```
template<typename PredResultsT = PredResults<>>
LinkPred::PR< PredResultsT >::PR (
    PR< PredResultsT > const & that ) [default]
```

Copy constructor.

## Parameters

|             |                     |
|-------------|---------------------|
| <i>that</i> | The object to copy. |
|-------------|---------------------|

**9.89.4.4 PR()** [4/4]

```
template<typename PredResultsT = PredResults<>>
LinkPred::PR< PredResultsT >::PR (
    PR< PredResultsT > && that ) [default]
```

Move constructor.

## Parameters

|             |                     |
|-------------|---------------------|
| <i>that</i> | The object to move. |
|-------------|---------------------|

**9.89.4.5 ~PR()**

```
template<typename PredResultsT = PredResults<>>
virtual LinkPred::PR< PredResultsT >::~~PR ( ) [virtual], [default]
```

Destructor.

**9.89.5 Member Function Documentation**

**9.89.5.1 eval()** [1/2]

```
template<typename PredResultsT = PredResults<>>
virtual void LinkPred::PR< PredResultsT >::eval (
    ScoresItT posScoresBegin,
    ScoresItT posScoresEnd,
    ScoresItT negScoresBegin,
    ScoresItT negScoresEnd,
    SortOrder & posSortOrder,
    SortOrder & negSortOrder,
    PerfResults & results ) [inline], [virtual]
```

Computes the area under the **PR** curve.

**Parameters**

|                       |                                                                           |
|-----------------------|---------------------------------------------------------------------------|
| <i>posScoresBegin</i> | Iterator to the first positive score.                                     |
| <i>posScoresEnd</i>   | Iterator to one-past-the-last positive score.                             |
| <i>negScoresBegin</i> | Iterator to the first negative score.                                     |
| <i>negScoresEnd</i>   | Iterator to one-past-the-last negative score.                             |
| <i>posSortOrder</i>   | The sorting order of positive scores. This may be modified by the method. |
| <i>negSortOrder</i>   | The sorting order of negative scores. This may be modified by the method. |
| <i>results</i>        | To write results.                                                         |

**9.89.5.2 eval()** [2/2]

```
template<typename PredResultsT = PredResults<>>
virtual void LinkPred::PR< PredResultsT >::eval (
    std::shared_ptr< PredResultsT > & predResults,
    PerfResults & results ) [inline], [virtual]
```

Computes the performance measure.

**Parameters**

|                    |                            |
|--------------------|----------------------------|
| <i>predResults</i> | The prediction results.    |
| <i>results</i>     | Iterator to write results. |

**9.89.5.3 getCurve()** [1/2]

```
template<typename PredResultsT = PredResults<>>
virtual std::vector<std::pair<double, double> > LinkPred::PR< PredResultsT >::getCurve (
    ScoresItT posScoresBegin,
    ScoresItT posScoresEnd,
    ScoresItT negScoresBegin,
    ScoresItT negScoresEnd,
```

```
SortOrder & posSortOrder,
SortOrder & negSortOrder ) [inline], [virtual]
```

Compute the [PR](#) curve.

#### Parameters

|                       |                                                                           |
|-----------------------|---------------------------------------------------------------------------|
| <i>posScoresBegin</i> | Iterator to the first positive score.                                     |
| <i>posScoresEnd</i>   | Iterator to one-past-the-last positive score.                             |
| <i>negScoresBegin</i> | Iterator to the first negative score.                                     |
| <i>negScoresEnd</i>   | Iterator to one-past-the-last negative score.                             |
| <i>posSortOrder</i>   | The sorting order of positive scores. This may be modified by the method. |
| <i>negSortOrder</i>   | The sorting order of negative scores. This may be modified by the method. |

#### Returns

A curve in the form of an `std::vector` of pairs representing the x and y coordinates.

#### 9.89.5.4 `getCurve()` [2/2]

```
template<typename PredResultsT = PredResults<>>
virtual std::vector<std::pair<double, double> > LinkPred::PR< PredResultsT >::getCurve (
    std::shared_ptr< PredResultsT > & predResults ) [inline], [virtual]
```

Compute the [PR](#) curve.

#### Parameters

|                    |                         |
|--------------------|-------------------------|
| <i>predResults</i> | The prediction results. |
|--------------------|-------------------------|

#### Returns

A curve in the form of an `std::vector` of pairs representing the x and y coordinates.

#### 9.89.5.5 `getInterpolMethod()`

```
template<typename PredResultsT = PredResults<>>
InterpolMethod LinkPred::PR< PredResultsT >::getInterpolMethod ( ) const [inline]
```

#### Returns

The interpolation method.



## 9.89.5.6 getPRAuc()

```
template<typename PredResultsT = PredResults<>>
template<typename ScoresItT >
static double LinkPred::PR< PredResultsT >::getPRAuc (
    ScoresItT posScoresBegin,
    ScoresItT posScoresEnd,
    ScoresItT negScoresBegin,
    ScoresItT negScoresEnd,
    InterpolMethod interpolMethod,
    bool parallel = false ) [inline], [static]
```

Compute the area under the Precision-Recall Curve. Ranges must be sorted in increasing order.

## Parameters

|                       |                                               |
|-----------------------|-----------------------------------------------|
| <i>posScoresBegin</i> | Iterator to the first positive score.         |
| <i>posScoresEnd</i>   | Iterator to one-past-the-last positive score. |
| <i>negScoresBegin</i> | Iterator to the first negative score.         |
| <i>negScoresEnd</i>   | Iterator to one-past-the-last negative score. |
| <i>interpolMethod</i> | Interpolation method used in the integral.    |
| <i>parallel</i>       | Whether to run in parallel.                   |

## 9.89.5.7 getPRAucDGI()

```
template<typename PredResultsT = PredResults<>>
template<typename CountItT >
static double LinkPred::PR< PredResultsT >::getPRAucDGI (
    CountItT tpsBegin,
    CountItT tpsEnd,
    CountItT fpsBegin,
    CountItT fpsEnd,
    std::size_t P,
    bool bcz,
    bool parallel = false ) [inline], [static]
```

Compute the area under the Precision-Recall Curve using Davis-Goadrich nonlinear interpolation. See: Jesse Davis and Mark Goadrich (2006) The relationship between Precision-Recall and ROC curves. Proceedings of the 23rd international conference on Machine learning. pp.233–240

## Parameters

|                 |                                                     |
|-----------------|-----------------------------------------------------|
| <i>tpsBegin</i> | Iterator to the first true positive count.          |
| <i>tpsEnd</i>   | Iterator to one-past-the-last true positive count.  |
| <i>fpsBegin</i> | Iterator to the first false positive count.         |
| <i>fpsEnd</i>   | Iterator to one-past-the-last false positive count. |
| <i>P</i>        | The number of positive instances.                   |
| <i>bcz</i>      | Whether the boundary value of precision is zero.    |
| <i>parallel</i> | Whether to run in parallel.                         |

### 9.89.5.8 getPRAucLIN()

```
template<typename PredResultsT = PredResults<>>
template<typename CountItT >
static double LinkPred::PR< PredResultsT >::getPRAucLIN (
    CountItT tpsBegin,
    CountItT tpsEnd,
    CountItT fpsBegin,
    CountItT fpsEnd,
    std::size_t P,
    bool bcz,
    bool parallel = false ) [inline], [static]
```

Compute the area under the Precision-Recall Curve using linear interpolation (trapezoidal rule). Notice that this method may over-estimate the actual area especially when the points on the curve are distant from one-another.

#### Parameters

|                 |                                                     |
|-----------------|-----------------------------------------------------|
| <i>tpsBegin</i> | Iterator to the first true positive count.          |
| <i>tpsEnd</i>   | Iterator to one-past-the-last true positive count.  |
| <i>fpsBegin</i> | Iterator to the first false positive count.         |
| <i>fpsEnd</i>   | Iterator to one-past-the-last false positive count. |
| <i>P</i>        | The number of positive instances.                   |
| <i>bcz</i>      | Whether the boundary value of precision is zero.    |
| <i>parallel</i> | Whether to run in parallel.                         |

### 9.89.5.9 getPRCurve()

```
template<typename PredResultsT = PredResults<>>
template<typename ScoresItT >
static std::vector<std::pair<double, double> > LinkPred::PR< PredResultsT >::getPRCurve (
    ScoresItT posScoresBegin,
    ScoresItT posScoresEnd,
    ScoresItT negScoresBegin,
    ScoresItT negScoresEnd,
    bool parallel = false ) [inline], [static]
```

Compute the Precision-Recall Curve. Ranges must sorted in increasing order.

#### Parameters

|                       |                                               |
|-----------------------|-----------------------------------------------|
| <i>posScoresBegin</i> | Iterator to the first positive score.         |
| <i>posScoresEnd</i>   | Iterator to one-past-the-last positive score. |
| <i>negScoresBegin</i> | Iterator to the first negative score.         |
| <i>negScoresEnd</i>   | Iterator to one-past-the-last negative score. |
| <i>parallel</i>       | Whether to run in parallel.                   |

**9.89.5.10 getThresholds()**

```
template<typename PredResultsT = PredResults<>>
template<typename ScoresItT >
static std::vector<double> LinkPred::PR< PredResultsT >::getThresholds (
    ScoresItT posScoresBegin,
    ScoresItT posScoresEnd,
    ScoresItT negScoresBegin,
    ScoresItT negScoresEnd ) [inline], [static]
```

Compute the threshold of the Precision-Recall Curve. Ranges must be sorted in increasing order.

**Parameters**

|                       |                                               |
|-----------------------|-----------------------------------------------|
| <i>posScoresBegin</i> | Iterator to the first positive score.         |
| <i>posScoresEnd</i>   | Iterator to one-past-the-last positive score. |
| <i>negScoresBegin</i> | Iterator to the first negative score.         |
| <i>negScoresEnd</i>   | Iterator to one-past-the-last negative score. |

**9.89.5.11 operator=() [1/2]**

```
template<typename PredResultsT = PredResults<>>
PR& LinkPred::PR< PredResultsT >::operator= (
    PR< PredResultsT > && that ) [default]
```

Move assignment operator.

**Parameters**

|             |                     |
|-------------|---------------------|
| <i>that</i> | The object to move. |
|-------------|---------------------|

**9.89.5.12 operator=() [2/2]**

```
template<typename PredResultsT = PredResults<>>
PR& LinkPred::PR< PredResultsT >::operator= (
    PR< PredResultsT > const & that ) [default]
```

Copy assignment operator.

**Parameters**

|             |                     |
|-------------|---------------------|
| <i>that</i> | The object to copy. |
|-------------|---------------------|

### 9.89.5.13 setInterpolMethod()

```
template<typename PredResultsT = PredResults<>>
void LinkPred::PR< PredResultsT >::setInterpolMethod (
    InterpolMethod interpolMethod ) [inline]
```

Set the interpolation method.

#### Parameters

|                       |                                            |
|-----------------------|--------------------------------------------|
| <i>interpolMethod</i> | The new value of the interpolation method. |
|-----------------------|--------------------------------------------|

The documentation for this class was generated from the following file:

- include/linkpred/perf/perfmeasure.hpp

## 9.90 LinkPred::Simp::Predictor Class Reference

A class that simplifies the use of link prediction algorithms.

```
#include <predictor.hpp>
```

### Public Member Functions

- [Predictor](#) ()=default
- [Predictor](#) ([Predictor](#) const &that)=default
- virtual [~Predictor](#) ()=default
- int [getNbNodes](#) () const
- std::string [getLabel](#) (int i) const
- int [getID](#) (std::string const &i) const
- bool [isEdgeByID](#) (int i, int j) const
- bool [isEdgeByLabel](#) (std::string const &i, std::string const &j) const
- void [loadnet](#) (std::string fileName)
- std::vector< [EdgeScore](#) > [predAllADA](#) ()
- void [predADA](#) (std::vector< [EdgeScore](#) > &edgeScores)
- std::vector< [EdgeScore](#) > [predTopADA](#) (int k)
- std::vector< [EdgeScore](#) > [predAllCNE](#) ()
- void [predCNE](#) (std::vector< [EdgeScore](#) > &edgeScores)
- std::vector< [EdgeScore](#) > [predTopCNE](#) (int k)
- std::vector< [EdgeScore](#) > [predAllCRA](#) ()
- void [predCRA](#) (std::vector< [EdgeScore](#) > &edgeScores)
- std::vector< [EdgeScore](#) > [predTopCRA](#) (int k)
- std::vector< [EdgeScore](#) > [predAllECL](#) (std::string encoderName="N2V", std::string classifierName="LGR", int dim=0, double posRatio=1.0, double negRatio=1.0, long int seed=0)
- void [predECL](#) (std::vector< [EdgeScore](#) > &edgeScores, std::string encoderName="N2V", std::string classifierName="LGR", int dim=0, double posRatio=1.0, double negRatio=1.0, long int seed=0)

- `std::vector< EdgeScore > predTopECL` (int k, std::string encoderName="N2V", std::string classifierName="LGR", int dim=0, double posRatio=1.0, double negRatio=1.0, long int seed=0)
- `std::vector< EdgeScore > predAllESM` (std::string encoderName="N2V", std::string simMeasureName="L2", int dim=0, long int seed=0)
- `void predESM` (std::vector< [EdgeScore](#) > &edgeScores, std::string encoderName="N2V", std::string simMeasureName="L2", int dim=0, long int seed=0)
- `std::vector< EdgeScore > predTopESM` (int k, std::string encoderName="N2V", std::string simMeasureName="L2", int dim=0, long int seed=0)
- `std::vector< EdgeScore > predAllFBM` (int maxIter=50, long int seed=0)
- `void predFBM` (std::vector< [EdgeScore](#) > &edgeScores, int maxIter=50, long int seed=0)
- `std::vector< EdgeScore > predTopFBM` (int k, int maxIter=50, long int seed=0)
- `std::vector< EdgeScore > predAllHDI` ()
- `void predHDI` (std::vector< [EdgeScore](#) > &edgeScores)
- `std::vector< EdgeScore > predTopHDI` (int k)
- `std::vector< EdgeScore > predAllHPI` ()
- `void predHPI` (std::vector< [EdgeScore](#) > &edgeScores)
- `std::vector< EdgeScore > predTopHPI` (int k)
- `std::vector< EdgeScore > predAllHRG` (int nbBeans=25, int nbSamples=10000, long int seed=0)
- `void predHRG` (std::vector< [EdgeScore](#) > &edgeScores, int nbBeans=25, int nbSamples=10000, long int seed=0)
- `std::vector< EdgeScore > predTopHRG` (int k, int nbBeans=25, int nbSamples=10000, long int seed=0)
- `std::vector< EdgeScore > predAllHYP` (double m=1.5, double L=1, double gamma=2.1, double zeta=1, double T=0.8, long int seed=0)
- `void predHYP` (std::vector< [EdgeScore](#) > &edgeScores, double m=1.5, double L=1, double gamma=2.1, double zeta=1, double T=0.8, long int seed=0)
- `std::vector< EdgeScore > predTopHYP` (int k, double m=1.5, double L=1, double gamma=2.1, double zeta=1, double T=0.8, long int seed=0)
- `std::vector< EdgeScore > predAllJID` ()
- `void predJID` (std::vector< [EdgeScore](#) > &edgeScores)
- `std::vector< EdgeScore > predTopJID` (int k)
- `std::vector< EdgeScore > predAllKAB` (int horizLim=2)
- `void predKAB` (std::vector< [EdgeScore](#) > &edgeScores, int horizLim=2)
- `std::vector< EdgeScore > predTopKAB` (int k, int horizLim=2)
- `std::vector< EdgeScore > predAllLCP` (double epsilon=0.001)
- `void predLCP` (std::vector< [EdgeScore](#) > &edgeScores, double epsilon=0.001)
- `std::vector< EdgeScore > predTopLCP` (int k, double epsilon=0.001)
- `std::vector< EdgeScore > predAllLHN` ()
- `void predLHN` (std::vector< [EdgeScore](#) > &edgeScores)
- `std::vector< EdgeScore > predTopLHN` (int k)
- `std::vector< EdgeScore > predAllPAT` ()
- `void predPAT` (std::vector< [EdgeScore](#) > &edgeScores)
- `std::vector< EdgeScore > predTopPAT` (int k)
- `std::vector< EdgeScore > predAllRAL` ()
- `void predRAL` (std::vector< [EdgeScore](#) > &edgeScores)
- `std::vector< EdgeScore > predTopRAL` (int k)
- `std::vector< EdgeScore > predAllRND` (long int seed=0)
- `void predRND` (std::vector< [EdgeScore](#) > &edgeScores, long int seed=0)
- `std::vector< EdgeScore > predTopRND` (int k, long int seed=0)
- `std::vector< EdgeScore > predAllSAI` ()
- `void predSAI` (std::vector< [EdgeScore](#) > &edgeScores)
- `std::vector< EdgeScore > predTopSAI` (int k)
- `std::vector< EdgeScore > predAllSBM` (int maxIter=1000, long int seed=0)
- `void predSBM` (std::vector< [EdgeScore](#) > &edgeScores, int maxIter=1000, long int seed=0)
- `std::vector< EdgeScore > predTopSBM` (int k, int maxIter=1000, long int seed=0)
- `std::vector< EdgeScore > predAllSHP` (long int seed=0)

- void [predSHP](#) (std::vector< [EdgeScore](#) > &edgeScores, long int seed=0)
- std::vector< [EdgeScore](#) > [predTopSHP](#) (int k, long int seed=0)
- std::vector< [EdgeScore](#) > [predAllSOI](#) ()
- void [predSOI](#) (std::vector< [EdgeScore](#) > &edgeScores)
- std::vector< [EdgeScore](#) > [predTopSOI](#) (int k)
- std::vector< [EdgeScoreByID](#) > [predAllADABylD](#) ()
- std::vector< [EdgeScoreByID](#) > [predAllCNEBylD](#) ()
- std::vector< [EdgeScoreByID](#) > [predAllCRABylD](#) ()
- std::vector< [EdgeScoreByID](#) > [predAllECLBylD](#) (std::string encoderName="N2V", std::string classifier←Name="LGR", int dim=0, double posRatio=1.0, double negRatio=1.0, long int seed=0)
- std::vector< [EdgeScoreByID](#) > [predAllESMBylD](#) (std::string encoderName="N2V", std::string simMeasure←Name="L2", int dim=0, long int seed=0)
- std::vector< [EdgeScoreByID](#) > [predAllFBMBylD](#) (int maxIter=50, long int seed=0)
- std::vector< [EdgeScoreByID](#) > [predAllHDIBylD](#) ()
- std::vector< [EdgeScoreByID](#) > [predAllHPIBylD](#) ()
- std::vector< [EdgeScoreByID](#) > [predAllHRGBylD](#) (int nbBeans=25, int nbSamples=10000, long int seed=0)
- std::vector< [EdgeScoreByID](#) > [predAllHYPBylD](#) (double m=1.5, double L=1, double gamma=2.1, double zeta=1, double T=0.8, long int seed=0)
- std::vector< [EdgeScoreByID](#) > [predAllJIDBylD](#) ()
- std::vector< [EdgeScoreByID](#) > [predAllKABBylD](#) (int horizLim=2)
- std::vector< [EdgeScoreByID](#) > [predAllLCPBylD](#) (double epsilon=0.001)
- std::vector< [EdgeScoreByID](#) > [predAllLHNBylD](#) ()
- std::vector< [EdgeScoreByID](#) > [predAllPATBylD](#) ()
- std::vector< [EdgeScoreByID](#) > [predAllRALBylD](#) ()
- std::vector< [EdgeScoreByID](#) > [predAllRNDBylD](#) (long int seed=0)
- std::vector< [EdgeScoreByID](#) > [predAllSAIBylD](#) ()
- std::vector< [EdgeScoreByID](#) > [predAllSBMBylD](#) (int maxIter=1000, long int seed=0)
- std::vector< [EdgeScoreByID](#) > [predAllSHPBylD](#) (long int seed=0)
- std::vector< [EdgeScoreByID](#) > [predAllSOIBylD](#) ()

### 9.90.1 Detailed Description

A class that simplifies the use of link prediction algorithms.

### 9.90.2 Constructor & Destructor Documentation

#### 9.90.2.1 Predictor() [1/2]

```
LinkPred::Simp::Predictor::Predictor ( ) [default]
```

##### Parameters

|            |              |
|------------|--------------|
| <i>net</i> | The network. |
|------------|--------------|

### 9.90.2.2 Predictor() [2/2]

```
LinkPred::Simp::Predictor::Predictor (  
    Predictor const & that ) [default]
```

Copy constructor.

#### Parameters

|             |                     |
|-------------|---------------------|
| <i>that</i> | The object to copy. |
|-------------|---------------------|

### 9.90.2.3 ~Predictor()

```
virtual LinkPred::Simp::Predictor::~~Predictor ( ) [virtual], [default]
```

Destructor.

## 9.90.3 Member Function Documentation

### 9.90.3.1 getID()

```
int LinkPred::Simp::Predictor::getID (  
    std::string const & i ) const
```

Translate node label to ID.

#### Parameters

|          |             |
|----------|-------------|
| <i>i</i> | Node label. |
|----------|-------------|

#### Returns

The node ID.

### 9.90.3.2 getLabel()

```
std::string LinkPred::Simp::Predictor::getLabel (  
    int i ) const
```

Translate node ID to label.

**Parameters**

|          |                                                    |
|----------|----------------------------------------------------|
| <i>i</i> | Node internal ID (sequential from 0 to nbNodes-1). |
|----------|----------------------------------------------------|

**Returns**

The node label.

**9.90.3.3 getNbNodes()**

```
int LinkPred::Simp::Predictor::getNbNodes ( ) const
```

Returns the number of nodes in the network.

**Returns**

The number of nodes in the network.

**9.90.3.4 isEdgeByID()**

```
bool LinkPred::Simp::Predictor::isEdgeByID (
    int i,
    int j ) const
```

Check if an edge exists using internal node IDs.

**Parameters**

|          |                   |
|----------|-------------------|
| <i>i</i> | ID of start node. |
| <i>j</i> | ID of end node.   |

**Returns**

True if (i, j) is an edge, false otherwise.

**9.90.3.5 isEdgeByLabel()**

```
bool LinkPred::Simp::Predictor::isEdgeByLabel (
    std::string const & i,
    std::string const & j ) const
```

Check if an edge exists using internal node IDs.



## Parameters

|          |                   |
|----------|-------------------|
| <i>i</i> | ID of start node. |
| <i>j</i> | ID of end node.   |

## Returns

True if (i, j) is an edge, false otherwise.

**9.90.3.6 loadnet()**

```
void LinkPred::Simp::Predictor::loadnet (
    std::string fileName )
```

Load network from file. The format is list of edges. Comments must be on separate lines and start with #.

## Parameters

|                 |                |
|-----------------|----------------|
| <i>fileName</i> | The file name. |
|-----------------|----------------|

**9.90.3.7 predADA()**

```
void LinkPred::Simp::Predictor::predADA (
    std::vector< EdgeScore > & edgeScores )
```

Adamic Adar predictor.

## Parameters

|                   |                                                                                               |
|-------------------|-----------------------------------------------------------------------------------------------|
| <i>edgeScores</i> | A input vector of negative edges. The score of each edge will be written in the member score. |
|-------------------|-----------------------------------------------------------------------------------------------|

**9.90.3.8 predAllADA()**

```
std::vector<EdgeScore> LinkPred::Simp::Predictor::predAllADA ( )
```

Adamic Adar predictor.

## Returns

The score of all negative edges.

### 9.90.3.9 predAllADAByID()

```
std::vector<EdgeScoreByID> LinkPred::Simp::Predictor::predAllADAByID ( )
```

Adamic Adar predictor.

#### Returns

The score of all negative edges.

### 9.90.3.10 predAllCNE()

```
std::vector<EdgeScore> LinkPred::Simp::Predictor::predAllCNE ( )
```

Common neighbors.

#### Returns

The score of all negative edges.

### 9.90.3.11 predAllCNEByID()

```
std::vector<EdgeScoreByID> LinkPred::Simp::Predictor::predAllCNEByID ( )
```

Common neighbors.

#### Returns

The score of all negative edges.

### 9.90.3.12 predAllCRA()

```
std::vector<EdgeScore> LinkPred::Simp::Predictor::predAllCRA ( )
```

Cannistraci resource allocation.

#### Returns

The score of all negative edges.

**9.90.3.13 predAllCRAByID()**

```
std::vector<EdgeScoreByID> LinkPred::Simp::Predictor::predAllCRAByID ( )
```

Cannistraci resource allocation.

**Returns**

The score of all negative edges.

**9.90.3.14 predAllECL()**

```
std::vector<EdgeScore> LinkPred::Simp::Predictor::predAllECL (
    std::string encoderName = "N2V",
    std::string classifierName = "LGR",
    int dim = 0,
    double posRatio = 1.0,
    double negRatio = 1.0,
    long int seed = 0 )
```

Encoder-classifier link predictor.

**Parameters**

|                       |                                                                                                                                                                                                                                                                                                                |
|-----------------------|----------------------------------------------------------------------------------------------------------------------------------------------------------------------------------------------------------------------------------------------------------------------------------------------------------------|
| <i>encoderName</i>    | The name of the encoder. Possible values are: DPW ( <a href="#">DeepWalk</a> ), HMSM (Hidden Metric Space Model), LVS ( <a href="#">LargeVis</a> ), LEM (Laplacian Eigenmaps), LIN ( <a href="#">LINE</a> ), LLE (Locally Linear Embedding), MFC (Matrix Factorization), and N2V ( <a href="#">Node2Vec</a> ). |
| <i>classifierName</i> | The name of the classifier. Possible values are: FFN (feed-forward neural network withn default architecture), LSVM (linear SVM), LGR (logistic regression), NVB (naive Bayes). All classifiers except logistic regression requirte compilation with mlpack.                                                   |
| <i>dim</i>            | The dimension of the embedding space. If set to zero, the default value is used (the default dimension depends on the ecnoder).                                                                                                                                                                                |
| <i>posRatio</i>       | Ratio of positive edges used in the training of the classifier.                                                                                                                                                                                                                                                |
| <i>negRatio</i>       | Ratio of negative edges used in the training of the classifier.                                                                                                                                                                                                                                                |
| <i>seed</i>           | Seed of the random number generator.                                                                                                                                                                                                                                                                           |

**Returns**

The score of all negative edges.

**9.90.3.15 predAllECLByID()**

```
std::vector<EdgeScoreByID> LinkPred::Simp::Predictor::predAllECLByID (
    std::string encoderName = "N2V",
    std::string classifierName = "LGR",
    int dim = 0,
```

```
double posRatio = 1.0,
double negRatio = 1.0,
long int seed = 0 )
```

Encoder-classifier link predictor.

#### Parameters

|                       |                                                                                                                                                                                                                                                                                                                                |
|-----------------------|--------------------------------------------------------------------------------------------------------------------------------------------------------------------------------------------------------------------------------------------------------------------------------------------------------------------------------|
| <i>encoderName</i>    | The name of the encoder. Possible values are: DPW ( <a href="#">DeepWalk</a> ), <a href="#">HMSM</a> (Hidden Metric Space Model), LVS ( <a href="#">LargeVis</a> ), LEM (Laplacian Eigenmaps), LIN ( <a href="#">LINE</a> ), LLE (Locally Linear Embedding), MFC (Matrix Factorization), and N2V ( <a href="#">Node2Vec</a> ). |
| <i>classifierName</i> | The name of the classifier. Possible values are: FFN (feed-forward neural network withn default architecture), LSVM (linear SVM), LGR (logistic regression), NVB (naive Bayes). All classifiers except logistic regression requirte compilation with mlpack.                                                                   |
| <i>dim</i>            | The dimension of the embedding space. If set to zero, the default value is used (the default dimension depends on the ecnoder).                                                                                                                                                                                                |
| <i>posRatio</i>       | Ratio of positive edges used in the training of the classifier.                                                                                                                                                                                                                                                                |
| <i>negRatio</i>       | Ratio of negative edges used in the training of the classifier.                                                                                                                                                                                                                                                                |
| <i>seed</i>           | Seed of the random number generator.                                                                                                                                                                                                                                                                                           |

#### Returns

The score of all negative edges.

### 9.90.3.16 predAllESM()

```
std::vector<EdgeScore> LinkPred::Simp::Predictor::predAllESM (
    std::string encoderName = "N2V",
    std::string simMeasureName = "L2",
    int dim = 0,
    long int seed = 0 )
```

Encoder-similarity measure link predictor.

#### Parameters

|                       |                                                                                                                                                                                                                                                                                                                                |
|-----------------------|--------------------------------------------------------------------------------------------------------------------------------------------------------------------------------------------------------------------------------------------------------------------------------------------------------------------------------|
| <i>encoderName</i>    | The name of the encoder. Possible values are: DPW ( <a href="#">DeepWalk</a> ), <a href="#">HMSM</a> (Hidden Metric Space Model), LVS ( <a href="#">LargeVis</a> ), LEM (Laplacian Eigenmaps), LIN ( <a href="#">LINE</a> ), LLE (Locally Linear Embedding), MFC (Matrix Factorization), and N2V ( <a href="#">Node2Vec</a> ). |
| <i>simMeasureName</i> | The name of the similarity measure. Possible values are: CSM (cosine similarity), DTP (dot product), L1 (L1 similarity), L2 (L2 similarity), PRS ( <a href="#">Pearson</a> similarity).                                                                                                                                        |
| <i>dim</i>            | The dimension of the embedding space. If set to zero, the default value is used (the default dimension depends on the ecnoder).                                                                                                                                                                                                |
| <i>seed</i>           | Seed of the random number generator.                                                                                                                                                                                                                                                                                           |

#### Returns

The score of all negative edges.

**9.90.3.17 predAllESMByID()**

```
std::vector<EdgeScoreByID> LinkPred::Simp::Predictor::predAllESMByID (
    std::string encoderName = "N2V",
    std::string simMeasureName = "L2",
    int dim = 0,
    long int seed = 0 )
```

Encoder-similarity measure link predictor.

**Parameters**

|                       |                                                                                                                                                                                                                                                                                                                |
|-----------------------|----------------------------------------------------------------------------------------------------------------------------------------------------------------------------------------------------------------------------------------------------------------------------------------------------------------|
| <i>encoderName</i>    | The name of the encoder. Possible values are: DPW ( <a href="#">DeepWalk</a> ), HMSM (Hidden Metric Space Model), LVS ( <a href="#">LargeVis</a> ), LEM (Laplacian Eigenmaps), LIN ( <a href="#">LINE</a> ), LLE (Locally Linear Embedding), MFC (Matrix Factorization), and N2V ( <a href="#">Node2Vec</a> ). |
| <i>simMeasureName</i> | The name of the similarity measure. Possible values are: CSM (cosine similarity), DTP (dot product), L1 (L1 similarity), L2 (L2 similarity), PRS ( <a href="#">Pearson</a> similarity).                                                                                                                        |
| <i>dim</i>            | The dimension of the embedding space. If set to zero, the default value is used (the default dimension depends on the encoder).                                                                                                                                                                                |
| <i>seed</i>           | Seed of the random number generator.                                                                                                                                                                                                                                                                           |

**Returns**

The score of all negative edges.

**9.90.3.18 predAllFBM()**

```
std::vector<EdgeScore> LinkPred::Simp::Predictor::predAllFBM (
    int maxIter = 50,
    long int seed = 0 )
```

Fast blocking model.

**Parameters**

|                |                                      |
|----------------|--------------------------------------|
| <i>maxIter</i> | Maximum number of iterations.        |
| <i>seed</i>    | Seed of the random number generator. |

**Returns**

The score of all negative edges.

**9.90.3.19 predAllFBMByID()**

```
std::vector<EdgeScoreByID> LinkPred::Simp::Predictor::predAllFBMByID (
    int maxIter = 50,
    long int seed = 0 )
```

Fast blocking model.

## Parameters

|                |                                      |
|----------------|--------------------------------------|
| <i>maxIter</i> | Maximum number of iterations.        |
| <i>seed</i>    | Seed of the random number generator. |

## Returns

The score of all negative edges.

**9.90.3.20 predAllHDI()**

```
std::vector<EdgeScore> LinkPred::Simp::Predictor::predAllHDI ( )
```

Hub depromoted index.

## Returns

The score of all negative edges.

**9.90.3.21 predAllHDIByID()**

```
std::vector<EdgeScoreByID> LinkPred::Simp::Predictor::predAllHDIByID ( )
```

Hub depromoted index.

## Returns

The score of all negative edges.

**9.90.3.22 predAllHPI()**

```
std::vector<EdgeScore> LinkPred::Simp::Predictor::predAllHPI ( )
```

Hub promoted index.

## Returns

The score of all negative edges.

### 9.90.3.23 predAllHPIByID()

```
std::vector<EdgeScoreByID> LinkPred::Simp::Predictor::predAllHPIByID ( )
```

Hub promoted index.

#### Returns

The score of all negative edges.

### 9.90.3.24 predAllHRG()

```
std::vector<EdgeScore> LinkPred::Simp::Predictor::predAllHRG (
    int nbBeans = 25,
    int nbSamples = 10000,
    long int seed = 0 )
```

Hierarchical random graph.

#### Parameters

|                  |                                              |
|------------------|----------------------------------------------|
| <i>nbBeans</i>   | Number of bins in edge statistics histogram. |
| <i>nbSamples</i> | Number of samples to take for predictions.   |
| <i>seed</i>      | Seed of the random number generator.         |

#### Returns

The score of all negative edges.

### 9.90.3.25 predAllHRGByID()

```
std::vector<EdgeScoreByID> LinkPred::Simp::Predictor::predAllHRGByID (
    int nbBeans = 25,
    int nbSamples = 10000,
    long int seed = 0 )
```

Hierarchical random graph.

#### Parameters

|                  |                                              |
|------------------|----------------------------------------------|
| <i>nbBeans</i>   | Number of bins in edge statistics histogram. |
| <i>nbSamples</i> | Number of samples to take for predictions.   |
| <i>seed</i>      | Seed of the random number generator.         |



**Returns**

The score of all negative edges.

**9.90.3.26 predAllHYP()**

```
std::vector<EdgeScore> LinkPred::Simp::Predictor::predAllHYP (
    double m = 1.5,
    double L = 1,
    double gamma = 2.1,
    double zeta = 1,
    double T = 0.8,
    long int seed = 0 )
```

Hypermap.

**Parameters**

|              |                                                               |
|--------------|---------------------------------------------------------------|
| <i>m</i>     | The parameter m (see the algorithm description).              |
| <i>L</i>     | The parameter L (see the algorithm description).              |
| <i>gamma</i> | The power law exponent gamma (see the algorithm description). |
| <i>zeta</i>  | The parameter zeta (see the algorithm description).           |
| <i>T</i>     | The parameter T (see the algorithm description).              |
| <i>seed</i>  | The random number generator seed.                             |

**Returns**

The score of all negative edges.

**9.90.3.27 predAllHYPByID()**

```
std::vector<EdgeScoreByID> LinkPred::Simp::Predictor::predAllHYPByID (
    double m = 1.5,
    double L = 1,
    double gamma = 2.1,
    double zeta = 1,
    double T = 0.8,
    long int seed = 0 )
```

Hypermap.

**Parameters**

|              |                                                               |
|--------------|---------------------------------------------------------------|
| <i>m</i>     | The parameter m (see the algorithm description).              |
| <i>L</i>     | The parameter L (see the algorithm description).              |
| <i>gamma</i> | The power law exponent gamma (see the algorithm description). |
| <i>zeta</i>  | The parameter zeta (see the algorithm description).           |
| <i>T</i>     | The parameter T (see the algorithm description).              |
| <i>seed</i>  | The random number generator seed.                             |

**Returns**

The score of all negative edges.

**9.90.3.28 predAllJID()**

```
std::vector<EdgeScore> LinkPred::Simp::Predictor::predAllJID ( )
```

Jackard index.

**Returns**

The score of all negative edges.

**9.90.3.29 predAllJIDByID()**

```
std::vector<EdgeScoreByID> LinkPred::Simp::Predictor::predAllJIDByID ( )
```

Jackard index.

**Returns**

The score of all negative edges.

**9.90.3.30 predAllKAB()**

```
std::vector<EdgeScore> LinkPred::Simp::Predictor::predAllKAB (
    int horizLim = 2 )
```

A scalable popularity similarity link predictor proposed in: "Kerrache, S., Alharbi, R. & Benhidour, H. A Scalable Similarity-Popularity Link Prediction Method. Sci Rep 10, 6394 (2020)".

**Parameters**

|                 |                |
|-----------------|----------------|
| <i>horizLim</i> | Horizon limit. |
|-----------------|----------------|

**Returns**

The score of all negative edges.

### 9.90.3.31 predAllKABByID()

```
std::vector<EdgeScoreByID> LinkPred::Simp::Predictor::predAllKABByID (
    int horizLim = 2 )
```

A scalable popularity similarity link predictor proposed in: "Kerrache, S., Alharbi, R. & Benhidour, H. A Scalable Similarity-Popularity Link Prediction Method. Sci Rep 10, 6394 (2020)".

#### Parameters

|                 |                |
|-----------------|----------------|
| <i>horizLim</i> | Horizon limit. |
|-----------------|----------------|

#### Returns

The score of all negative edges.

### 9.90.3.32 predAllLCP()

```
std::vector<EdgeScore> LinkPred::Simp::Predictor::predAllLCP (
    double epsilon = 0.001 )
```

Local path.

#### Parameters

|                |                                  |
|----------------|----------------------------------|
| <i>epsilon</i> | The weight of paths of length 3. |
|----------------|----------------------------------|

#### Returns

The score of all negative edges.

### 9.90.3.33 predAllLCPByID()

```
std::vector<EdgeScoreByID> LinkPred::Simp::Predictor::predAllLCPByID (
    double epsilon = 0.001 )
```

Local path.

#### Parameters

|                |                                  |
|----------------|----------------------------------|
| <i>epsilon</i> | The weight of paths of length 3. |
|----------------|----------------------------------|

**Returns**

The score of all negative edges.

**9.90.3.34 predAllLHN()**

```
std::vector<EdgeScore> LinkPred::Simp::Predictor::predAllLHN ( )
```

Leicht-Holme-Newman index.

**Returns**

The score of all negative edges.

**9.90.3.35 predAllLHNByID()**

```
std::vector<EdgeScoreByID> LinkPred::Simp::Predictor::predAllLHNByID ( )
```

Leicht-Holme-Newman index.

**Returns**

The score of all negative edges.

**9.90.3.36 predAllPAT()**

```
std::vector<EdgeScore> LinkPred::Simp::Predictor::predAllPAT ( )
```

Preferential attachment index.

**Returns**

The score of all negative edges.

**9.90.3.37 predAllPATByID()**

```
std::vector<EdgeScoreByID> LinkPred::Simp::Predictor::predAllPATByID ( )
```

Preferential attachment index.

**Returns**

The score of all negative edges.

### 9.90.3.38 predAllRAL()

```
std::vector<EdgeScore> LinkPred::Simp::Predictor::predAllRAL ( )
```

Resource allocation index.

#### Returns

The score of all negative edges.

### 9.90.3.39 predAllRALByID()

```
std::vector<EdgeScoreByID> LinkPred::Simp::Predictor::predAllRALByID ( )
```

Resource allocation index.

#### Returns

The score of all negative edges.

### 9.90.3.40 predAllRND()

```
std::vector<EdgeScore> LinkPred::Simp::Predictor::predAllRND (
    long int seed = 0 )
```

Random predictor.

#### Parameters

|             |                                   |
|-------------|-----------------------------------|
| <i>seed</i> | The random number generator seed. |
|-------------|-----------------------------------|

#### Returns

The score of all negative edges.

### 9.90.3.41 predAllRNDByID()

```
std::vector<EdgeScoreByID> LinkPred::Simp::Predictor::predAllRNDByID (
    long int seed = 0 )
```

Random predictor.

**Parameters**

|             |                                   |
|-------------|-----------------------------------|
| <i>seed</i> | The random number generator seed. |
|-------------|-----------------------------------|

**Returns**

The score of all negative edges.

**9.90.3.42 predAllSAI()**

```
std::vector<EdgeScore> LinkPred::Simp::Predictor::predAllSAI ( )
```

Salton index.

**Returns**

The score of all negative edges.

**9.90.3.43 predAllSAIByID()**

```
std::vector<EdgeScoreByID> LinkPred::Simp::Predictor::predAllSAIByID ( )
```

Salton index.

**Returns**

The score of all negative edges.

**9.90.3.44 predAllSBM()**

```
std::vector<EdgeScore> LinkPred::Simp::Predictor::predAllSBM (
    int maxIter = 1000,
    long int seed = 0 )
```

Stochastic blocking model.

**Parameters**

|                |                                      |
|----------------|--------------------------------------|
| <i>maxIter</i> | Maximum number of iterations.        |
| <i>seed</i>    | Seed of the random number generator. |

**Returns**

The score of all negative edges.

**9.90.3.45 predAllSBMByID()**

```
std::vector<EdgeScoreByID> LinkPred::Simp::Predictor::predAllSBMByID (
    int maxIter = 1000,
    long int seed = 0 )
```

Stochastic blocking model.

**Parameters**

|                |                                      |
|----------------|--------------------------------------|
| <i>maxIter</i> | Maximum number of iterations.        |
| <i>seed</i>    | Seed of the random number generator. |

**Returns**

The score of all negative edges.

**9.90.3.46 predAllSHP()**

```
std::vector<EdgeScore> LinkPred::Simp::Predictor::predAllSHP (
    long int seed = 0 )
```

Shortest path predictor.

**Parameters**

|             |                                   |
|-------------|-----------------------------------|
| <i>seed</i> | The random number generator seed. |
|-------------|-----------------------------------|

**Returns**

The score of all negative edges.

**9.90.3.47 predAllSHPByID()**

```
std::vector<EdgeScoreByID> LinkPred::Simp::Predictor::predAllSHPByID (
    long int seed = 0 )
```

Shortest path predictor.

**Parameters**

|             |                                   |
|-------------|-----------------------------------|
| <i>seed</i> | The random number generator seed. |
|-------------|-----------------------------------|

**Returns**

The score of all negative edges.

**9.90.3.48 predAllSOI()**

```
std::vector<EdgeScore> LinkPred::Simp::Predictor::predAllSOI ( )
```

Sorensen index.

**Returns**

The score of all negative edges.

**9.90.3.49 predAllSOIByID()**

```
std::vector<EdgeScoreByID> LinkPred::Simp::Predictor::predAllSOIByID ( )
```

Sorensen index.

**Returns**

The score of all negative edges.

**9.90.3.50 predCNE()**

```
void LinkPred::Simp::Predictor::predCNE (
    std::vector< EdgeScore > & edgeScores )
```

Common neighbors.

**Parameters**

|                   |                                                                                               |
|-------------------|-----------------------------------------------------------------------------------------------|
| <i>edgeScores</i> | A input vector of negative edges. The score of each edge will be written in the member score. |
|-------------------|-----------------------------------------------------------------------------------------------|



### 9.90.3.51 predCRA()

```
void LinkPred::Simp::Predictor::predCRA (
    std::vector< EdgeScore > & edgeScores )
```

Cannistraci resource allocation.

#### Parameters

|                   |                                                                                               |
|-------------------|-----------------------------------------------------------------------------------------------|
| <i>edgeScores</i> | A input vector of negative edges. The score of each edge will be written in the member score. |
|-------------------|-----------------------------------------------------------------------------------------------|

### 9.90.3.52 predECL()

```
void LinkPred::Simp::Predictor::predECL (
    std::vector< EdgeScore > & edgeScores,
    std::string encoderName = "N2V",
    std::string classifierName = "LGR",
    int dim = 0,
    double posRatio = 1.0,
    double negRatio = 1.0,
    long int seed = 0 )
```

Encoder-classifier link predictor.

#### Parameters

|                       |                                                                                                                                                                                                                                                                                                                                |
|-----------------------|--------------------------------------------------------------------------------------------------------------------------------------------------------------------------------------------------------------------------------------------------------------------------------------------------------------------------------|
| <i>edgeScores</i>     | A input vector of negative edges. The score of each edge will be written in the member score.                                                                                                                                                                                                                                  |
| <i>encoderName</i>    | The name of the encoder. Possible values are: DPW ( <a href="#">DeepWalk</a> ), <a href="#">HMSM</a> (Hidden Metric Space Model), LVS ( <a href="#">LargeVis</a> ), LEM (Laplacian Eigenmaps), LIN ( <a href="#">LINE</a> ), LLE (Locally Linear Embedding), MFC (Matrix Factorization), and N2V ( <a href="#">Node2Vec</a> ). |
| <i>classifierName</i> | The name of the classifier. Possible values are: FFN (feed-forward neural network withn default architecture), LSVM (linear SVM), LGR (logistic regression), NVB (naive Bayes). All classifiers except logistic regression requirte compilation with mlpack.                                                                   |
| <i>dim</i>            | The dimension of the embedding space. If set to zero, the default value is used (the default dimension depends on the ecnoder).                                                                                                                                                                                                |
| <i>posRatio</i>       | Ratio of positive edges used in the training of the classifier.                                                                                                                                                                                                                                                                |
| <i>negRatio</i>       | Ratio of negative edges used in the training of the classifier.                                                                                                                                                                                                                                                                |
| <i>seed</i>           | Seed of the random number generator.                                                                                                                                                                                                                                                                                           |

### 9.90.3.53 predESM()

```
void LinkPred::Simp::Predictor::predESM (
    std::vector< EdgeScore > & edgeScores,
    std::string encoderName = "N2V",
    std::string simMeasureName = "L2",
```

```
int dim = 0,
long int seed = 0 )
```

Encoder-similarity measure link predictor.

#### Parameters

|                       |                                                                                                                                                                                                                                                                                                                |
|-----------------------|----------------------------------------------------------------------------------------------------------------------------------------------------------------------------------------------------------------------------------------------------------------------------------------------------------------|
| <i>edgeScores</i>     | A input vector of negative edges. The score of each edge will be written in the member score.                                                                                                                                                                                                                  |
| <i>encoderName</i>    | The name of the encoder. Possible values are: DPW ( <a href="#">DeepWalk</a> ), HMSM (Hidden Metric Space Model), LVS ( <a href="#">LargeVis</a> ), LEM (Laplacian Eigenmaps), LIN ( <a href="#">LINE</a> ), LLE (Locally Linear Embedding), MFC (Matrix Factorization), and N2V ( <a href="#">Node2Vec</a> ). |
| <i>simMeasureName</i> | The name of the similarity measure. Possible values are: CSM (cosine similarity), DTP (dot product), L1 (L1 similarity), L2 (L2 similarity), PRS ( <a href="#">Pearson</a> similarity).                                                                                                                        |
| <i>dim</i>            | The dimension of the embedding space. If set to zero, the default value is used (the default dimension depends on the encoder).                                                                                                                                                                                |
| <i>seed</i>           | Seed of the random number generator.                                                                                                                                                                                                                                                                           |

#### 9.90.3.54 predFBM()

```
void LinkPred::Simp::Predictor::predFBM (
    std::vector< EdgeScore > & edgeScores,
    int maxIter = 50,
    long int seed = 0 )
```

Fast blocking model.

#### Parameters

|                   |                                                                                               |
|-------------------|-----------------------------------------------------------------------------------------------|
| <i>edgeScores</i> | A input vector of negative edges. The score of each edge will be written in the member score. |
| <i>maxIter</i>    | Maximum number of iterations.                                                                 |
| <i>seed</i>       | Seed of the random number generator.                                                          |

#### 9.90.3.55 predHDI()

```
void LinkPred::Simp::Predictor::predHDI (
    std::vector< EdgeScore > & edgeScores )
```

Hub depromoted index.

#### Parameters

|                   |                                                                                               |
|-------------------|-----------------------------------------------------------------------------------------------|
| <i>edgeScores</i> | A input vector of negative edges. The score of each edge will be written in the member score. |
|-------------------|-----------------------------------------------------------------------------------------------|

**9.90.3.56 predHPI()**

```
void LinkPred::Simp::Predictor::predHPI (
    std::vector< EdgeScore > & edgeScores )
```

Hub promoted index.

**Parameters**

|                   |                                                                                               |
|-------------------|-----------------------------------------------------------------------------------------------|
| <i>edgeScores</i> | A input vector of negative edges. The score of each edge will be written in the member score. |
|-------------------|-----------------------------------------------------------------------------------------------|

**9.90.3.57 predHRG()**

```
void LinkPred::Simp::Predictor::predHRG (
    std::vector< EdgeScore > & edgeScores,
    int nbBeans = 25,
    int nbSamples = 10000,
    long int seed = 0 )
```

Hierarchical random graph.

**Parameters**

|                   |                                                                                               |
|-------------------|-----------------------------------------------------------------------------------------------|
| <i>edgeScores</i> | A input vector of negative edges. The score of each edge will be written in the member score. |
| <i>nbBeans</i>    | Number of bins in edge statistics histogram.                                                  |
| <i>nbSamples</i>  | Number of samples to take for predictions.                                                    |
| <i>seed</i>       | Seed of the random number generator.                                                          |

**9.90.3.58 predHYP()**

```
void LinkPred::Simp::Predictor::predHYP (
    std::vector< EdgeScore > & edgeScores,
    double m = 1.5,
    double L = 1,
    double gamma = 2.1,
    double zeta = 1,
    double T = 0.8,
    long int seed = 0 )
```

Hypermap.

**Parameters**

|                   |                                                                                               |
|-------------------|-----------------------------------------------------------------------------------------------|
| <i>edgeScores</i> | A input vector of negative edges. The score of each edge will be written in the member score. |
| <i>m</i>          | The parameter m (see the algorithm description).                                              |
| <i>L</i>          | The parameter L (see the algorithm description).                                              |

## Parameters

|              |                                                               |
|--------------|---------------------------------------------------------------|
| <i>gamma</i> | The power law exponent gamma (see the algorithm description). |
| <i>zeta</i>  | The parameter zeta (see the algorithm description).           |
| <i>T</i>     | The parameter T (see the algorithm description).              |
| <i>seed</i>  | The random number generator seed.                             |

**9.90.3.59 predJID()**

```
void LinkPred::Simp::Predictor::predJID (
    std::vector< EdgeScore > & edgeScores )
```

Jackard index.

## Parameters

|                   |                                                                                               |
|-------------------|-----------------------------------------------------------------------------------------------|
| <i>edgeScores</i> | A input vector of negative edges. The score of each edge will be written in the member score. |
|-------------------|-----------------------------------------------------------------------------------------------|

**9.90.3.60 predKAB()**

```
void LinkPred::Simp::Predictor::predKAB (
    std::vector< EdgeScore > & edgeScores,
    int horizLim = 2 )
```

A scalable popularity similarity link predictor proposed in: "Kerrache, S., Alharbi, R. & Benhidour, H. A Scalable Similarity-Popularity Link Prediction Method. Sci Rep 10, 6394 (2020)".

## Parameters

|                   |                                                                                               |
|-------------------|-----------------------------------------------------------------------------------------------|
| <i>edgeScores</i> | A input vector of negative edges. The score of each edge will be written in the member score. |
| <i>horizLim</i>   | Horizon limit.                                                                                |

**9.90.3.61 predLCP()**

```
void LinkPred::Simp::Predictor::predLCP (
    std::vector< EdgeScore > & edgeScores,
    double epsilon = 0.001 )
```

Local path.

## Parameters

|                   |                                                                                               |
|-------------------|-----------------------------------------------------------------------------------------------|
| <i>edgeScores</i> | A input vector of negative edges. The score of each edge will be written in the member score. |
| <i>epsilon</i>    | The weight of paths of length 3.                                                              |

**9.90.3.62 predLHN()**

```
void LinkPred::Simp::Predictor::predLHN (
    std::vector< EdgeScore > & edgeScores )
```

Leicht-Holme-Newman index.

## Parameters

|                   |                                                                                               |
|-------------------|-----------------------------------------------------------------------------------------------|
| <i>edgeScores</i> | A input vector of negative edges. The score of each edge will be written in the member score. |
|-------------------|-----------------------------------------------------------------------------------------------|

**9.90.3.63 predPAT()**

```
void LinkPred::Simp::Predictor::predPAT (
    std::vector< EdgeScore > & edgeScores )
```

Preferential attachment index.

## Parameters

|                   |                                                                                               |
|-------------------|-----------------------------------------------------------------------------------------------|
| <i>edgeScores</i> | A input vector of negative edges. The score of each edge will be written in the member score. |
|-------------------|-----------------------------------------------------------------------------------------------|

**9.90.3.64 predRAL()**

```
void LinkPred::Simp::Predictor::predRAL (
    std::vector< EdgeScore > & edgeScores )
```

Resource allocation index.

## Parameters

|                   |                                                                                               |
|-------------------|-----------------------------------------------------------------------------------------------|
| <i>edgeScores</i> | A input vector of negative edges. The score of each edge will be written in the member score. |
|-------------------|-----------------------------------------------------------------------------------------------|

### 9.90.3.65 predRND()

```
void LinkPred::Simp::Predictor::predRND (
    std::vector< EdgeScore > & edgeScores,
    long int seed = 0 )
```

Random predictor.

#### Parameters

|                   |                                                                                               |
|-------------------|-----------------------------------------------------------------------------------------------|
| <i>edgeScores</i> | A input vector of negative edges. The score of each edge will be written in the member score. |
| <i>seed</i>       | The random number generator seed.                                                             |

### 9.90.3.66 predSAI()

```
void LinkPred::Simp::Predictor::predSAI (
    std::vector< EdgeScore > & edgeScores )
```

Salton index.

#### Parameters

|                   |                                                                                               |
|-------------------|-----------------------------------------------------------------------------------------------|
| <i>edgeScores</i> | A input vector of negative edges. The score of each edge will be written in the member score. |
|-------------------|-----------------------------------------------------------------------------------------------|

### 9.90.3.67 predSBM()

```
void LinkPred::Simp::Predictor::predSBM (
    std::vector< EdgeScore > & edgeScores,
    int maxIter = 1000,
    long int seed = 0 )
```

Stochastic blocking model.

#### Parameters

|                   |                                                                                               |
|-------------------|-----------------------------------------------------------------------------------------------|
| <i>edgeScores</i> | A input vector of negative edges. The score of each edge will be written in the member score. |
| <i>maxIter</i>    | Maximum number of iterations.                                                                 |
| <i>seed</i>       | Seed of the random number generator.                                                          |

### 9.90.3.68 predSHP()

```
void LinkPred::Simp::Predictor::predSHP (
```

```
std::vector< EdgeScore > & edgeScores,  
long int seed = 0 )
```

Shortest path predictor.

#### Parameters

|                   |                                                                                               |
|-------------------|-----------------------------------------------------------------------------------------------|
| <i>edgeScores</i> | A input vector of negative edges. The score of each edge will be written in the member score. |
| <i>seed</i>       | The random number generator seed.                                                             |

#### 9.90.3.69 predSOI()

```
void LinkPred::Simp::Predictor::predSOI (  
    std::vector< EdgeScore > & edgeScores )
```

Sorensen index.

#### Parameters

|                   |                                                                                               |
|-------------------|-----------------------------------------------------------------------------------------------|
| <i>edgeScores</i> | A input vector of negative edges. The score of each edge will be written in the member score. |
|-------------------|-----------------------------------------------------------------------------------------------|

#### 9.90.3.70 predTopADA()

```
std::vector<EdgeScore> LinkPred::Simp::Predictor::predTopADA (  
    int k )
```

Adamic Adar predictor.

#### Parameters

|          |                                                                    |
|----------|--------------------------------------------------------------------|
| <i>k</i> | Number of edges to be returned (the actual number may be smaller). |
|----------|--------------------------------------------------------------------|

#### Returns

The top k negative edge scores (the actual size may of the output be smaller than k).

#### 9.90.3.71 predTopCNE()

```
std::vector<EdgeScore> LinkPred::Simp::Predictor::predTopCNE (  
    int k )
```

Common neighbors.

**Parameters**

|          |                                                                    |
|----------|--------------------------------------------------------------------|
| <i>k</i> | Number of edges to be returned (the actual number may be smaller). |
|----------|--------------------------------------------------------------------|

**Returns**

The top *k* negative edge scores (the actual size may of the output be smaller than *k*).

**9.90.3.72 predTopCRA()**

```
std::vector<EdgeScore> LinkPred::Simp::Predictor::predTopCRA (
    int k )
```

Cannistraci resource allocation.

**Parameters**

|          |                                                                    |
|----------|--------------------------------------------------------------------|
| <i>k</i> | Number of edges to be returned (the actual number may be smaller). |
|----------|--------------------------------------------------------------------|

**Returns**

The top *k* negative edge scores (the actual size may of the output be smaller than *k*).

**9.90.3.73 predTopECL()**

```
std::vector<EdgeScore> LinkPred::Simp::Predictor::predTopECL (
    int k,
    std::string encoderName = "N2V",
    std::string classifierName = "LGR",
    int dim = 0,
    double posRatio = 1.0,
    double negRatio = 1.0,
    long int seed = 0 )
```

Encoder-classifier link predictor.

**Parameters**

|                       |                                                                                                                                                                                                                                                                                                                |
|-----------------------|----------------------------------------------------------------------------------------------------------------------------------------------------------------------------------------------------------------------------------------------------------------------------------------------------------------|
| <i>k</i>              | Number of edges to be returned (the actual number may be smaller).                                                                                                                                                                                                                                             |
| <i>encoderName</i>    | The name of the encoder. Possible values are: DPW ( <a href="#">DeepWalk</a> ), HMSM (Hidden Metric Space Model), LVS ( <a href="#">LargeVis</a> ), LEM (Laplacian Eigenmaps), LIN ( <a href="#">LINE</a> ), LLE (Locally Linear Embedding), MFC (Matrix Factorization), and N2V ( <a href="#">Node2Vec</a> ). |
| <i>classifierName</i> | The name of the classifier. Possible values are: FFN (feed-forward neural network withn default architecture), LSVM (linear SVM), LGR (logistic regression), NVB (naive Bayes). All classifiers except logistic regression requirte compilation with mlpack.                                                   |



## Parameters

|                 |                                                                                                                                 |
|-----------------|---------------------------------------------------------------------------------------------------------------------------------|
| <i>dim</i>      | The dimension of the embedding space. If set to zero, the default value is used (the default dimension depends on the ecnoder). |
| <i>posRatio</i> | Ratio of positive edges used in the training of the classifier.                                                                 |
| <i>negRatio</i> | Ratio of negative edges used in the training of the classifier.                                                                 |
| <i>seed</i>     | Seed of the random number generator.                                                                                            |

## Returns

The top k negative edge scores (the actual size may of the output be smaller than k).

## 9.90.3.74 predTopESM()

```
std::vector<EdgeScore> LinkPred::Simp::Predictor::predTopESM (
    int k,
    std::string encoderName = "N2V",
    std::string simMeasureName = "L2",
    int dim = 0,
    long int seed = 0 )
```

Encoder-similarity measure link predictor.

## Parameters

|                       |                                                                                                                                                                                                                                                                                                                |
|-----------------------|----------------------------------------------------------------------------------------------------------------------------------------------------------------------------------------------------------------------------------------------------------------------------------------------------------------|
| <i>k</i>              | Number of edges to be returned (the actual number may be smaller).                                                                                                                                                                                                                                             |
| <i>encoderName</i>    | The name of the encoder. Possible values are: DPW ( <a href="#">DeepWalk</a> ), HMSM (Hidden Metric Space Model), LVS ( <a href="#">LargeVis</a> ), LEM (Laplacian Eigenmaps), LIN ( <a href="#">LINE</a> ), LLE (Locally Linear Embedding), MFC (Matrix Factorization), and N2V ( <a href="#">Node2Vec</a> ). |
| <i>simMeasureName</i> | The name of the similarity measure. Possible values are: CSM (cosine similarity), DTP (dot product), L1 (L1 similarity), L2 (L2 similarity), PRS ( <a href="#">Pearson</a> similarity).                                                                                                                        |
| <i>dim</i>            | The dimension of the embedding space. If set to zero, the default value is used (the default dimension depends on the ecnoder).                                                                                                                                                                                |
| <i>seed</i>           | Seed of the random number generator.                                                                                                                                                                                                                                                                           |

## Returns

The top k negative edge scores (the actual size may of the output be smaller than k).

## 9.90.3.75 predTopFBM()

```
std::vector<EdgeScore> LinkPred::Simp::Predictor::predTopFBM (
    int k,
    int maxIter = 50,
    long int seed = 0 )
```

Fast blocking model.

**Parameters**

|                |                                                                    |
|----------------|--------------------------------------------------------------------|
| <i>k</i>       | Number of edges to be returned (the actual number may be smaller). |
| <i>maxIter</i> | Maximum number of iterations.                                      |
| <i>seed</i>    | Seed of the random number generator.                               |

**Returns**

The top k negative edge scores (the actual size may of the output be smaller than k).

**9.90.3.76 predTopHDI()**

```
std::vector<EdgeScore> LinkPred::Simp::Predictor::predTopHDI (
    int k )
```

Hub depromoted index.

**Parameters**

|          |                                                                    |
|----------|--------------------------------------------------------------------|
| <i>k</i> | Number of edges to be returned (the actual number may be smaller). |
|----------|--------------------------------------------------------------------|

**Returns**

The top k negative edge scores (the actual size may of the output be smaller than k).

**9.90.3.77 predTopHPI()**

```
std::vector<EdgeScore> LinkPred::Simp::Predictor::predTopHPI (
    int k )
```

Hub promoted index.

**Parameters**

|          |                                                                    |
|----------|--------------------------------------------------------------------|
| <i>k</i> | Number of edges to be returned (the actual number may be smaller). |
|----------|--------------------------------------------------------------------|

**Returns**

The top k negative edge scores (the actual size may of the output be smaller than k).

**9.90.3.78 predTopHRG()**

```
std::vector<EdgeScore> LinkPred::Simp::Predictor::predTopHRG (
    int k,
    int nbBeans = 25,
    int nbSamples = 10000,
    long int seed = 0 )
```

Hierarchical random graph.

**Parameters**

|                  |                                                                    |
|------------------|--------------------------------------------------------------------|
| <i>k</i>         | Number of edges to be returned (the actual number may be smaller). |
| <i>nbBeans</i>   | Number of bins in edge statistics histogram.                       |
| <i>nbSamples</i> | Number of samples to take for predictions.                         |
| <i>seed</i>      | Seed of the random number generator.                               |

**Returns**

The top k negative edge scores (the actual size may of the output be smaller than k).

**9.90.3.79 predTopHYP()**

```
std::vector<EdgeScore> LinkPred::Simp::Predictor::predTopHYP (
    int k,
    double m = 1.5,
    double L = 1,
    double gamma = 2.1,
    double zeta = 1,
    double T = 0.8,
    long int seed = 0 )
```

Hypermap.

**Parameters**

|              |                                                                    |
|--------------|--------------------------------------------------------------------|
| <i>k</i>     | Number of edges to be returned (the actual number may be smaller). |
| <i>m</i>     | The parameter m (see the algorithm description).                   |
| <i>L</i>     | The parameter L (see the algorithm description).                   |
| <i>gamma</i> | The power law exponent gamma (see the algorithm description).      |
| <i>zeta</i>  | The parameter zeta (see the algorithm description).                |
| <i>T</i>     | The parameter T (see the algorithm description).                   |
| <i>seed</i>  | The random number generator seed.                                  |

**Returns**

The top k negative edge scores (the actual size may of the output be smaller than k).

**9.90.3.80 predTopJID()**

```
std::vector<EdgeScore> LinkPred::Simp::Predictor::predTopJID (
    int k )
```

Jackard index.

**Parameters**

|          |                                                                    |
|----------|--------------------------------------------------------------------|
| <i>k</i> | Number of edges to be returned (the actual number may be smaller). |
|----------|--------------------------------------------------------------------|

**Returns**

The top k negative edge scores (the actual size may of the output be smaller than k).

**9.90.3.81 predTopKAB()**

```
std::vector<EdgeScore> LinkPred::Simp::Predictor::predTopKAB (
    int k,
    int horizLim = 2 )
```

A scalable popularity similarity link predictor proposed in: "Kerrache, S., Alharbi, R. & Benhidour, H. A Scalable Similarity-Popularity Link Prediction Method. Sci Rep 10, 6394 (2020)".

**Parameters**

|                 |                                                                    |
|-----------------|--------------------------------------------------------------------|
| <i>k</i>        | Number of edges to be returned (the actual number may be smaller). |
| <i>horizLim</i> | Horizon limit.                                                     |

**Returns**

The top k negative edge scores (the actual size may of the output be smaller than k).

**9.90.3.82 predTopLCP()**

```
std::vector<EdgeScore> LinkPred::Simp::Predictor::predTopLCP (
    int k,
    double epsilon = 0.001 )
```

Local path.

**Parameters**

|                |                                                                    |
|----------------|--------------------------------------------------------------------|
| <i>k</i>       | Number of edges to be returned (the actual number may be smaller). |
| <i>epsilon</i> | The weight of paths of length 3.                                   |

**Returns**

The top k negative edge scores (the actual size may of the output be smaller than k).

**9.90.3.83 predTopLHN()**

```
std::vector<EdgeScore> LinkPred::Simp::Predictor::predTopLHN (  
    int k )
```

Leicht-Holme-Newman index.

**Parameters**

|          |                                                                    |
|----------|--------------------------------------------------------------------|
| <i>k</i> | Number of edges to be returned (the actual number may be smaller). |
|----------|--------------------------------------------------------------------|

**Returns**

The top k negative edge scores (the actual size may of the output be smaller than k).

**9.90.3.84 predTopPAT()**

```
std::vector<EdgeScore> LinkPred::Simp::Predictor::predTopPAT (  
    int k )
```

Preferential attachment index.

**Parameters**

|          |                                                                    |
|----------|--------------------------------------------------------------------|
| <i>k</i> | Number of edges to be returned (the actual number may be smaller). |
|----------|--------------------------------------------------------------------|

**Returns**

The top k negative edge scores (the actual size may of the output be smaller than k).

**9.90.3.85 predTopRAL()**

```
std::vector<EdgeScore> LinkPred::Simp::Predictor::predTopRAL (  
    int k )
```

Resource allocation index.

**Parameters**

|          |                                                                    |
|----------|--------------------------------------------------------------------|
| <i>k</i> | Number of edges to be returned (the actual number may be smaller). |
|----------|--------------------------------------------------------------------|

**Returns**

The top *k* negative edge scores (the actual size may of the output be smaller than *k*).

**9.90.3.86 predTopRND()**

```
std::vector<EdgeScore> LinkPred::Simp::Predictor::predTopRND (  
    int k,  
    long int seed = 0 )
```

Random predictor.

**Parameters**

|             |                                                                    |
|-------------|--------------------------------------------------------------------|
| <i>k</i>    | Number of edges to be returned (the actual number may be smaller). |
| <i>seed</i> | The random number generator seed.                                  |

**Returns**

The top *k* negative edge scores (the actual size may of the output be smaller than *k*).

**9.90.3.87 predTopSAI()**

```
std::vector<EdgeScore> LinkPred::Simp::Predictor::predTopSAI (  
    int k )
```

Salton index.

**Parameters**

|          |                                                                    |
|----------|--------------------------------------------------------------------|
| <i>k</i> | Number of edges to be returned (the actual number may be smaller). |
|----------|--------------------------------------------------------------------|

**Returns**

The top *k* negative edge scores (the actual size may of the output be smaller than *k*).

### 9.90.3.88 predTopSBM()

```
std::vector<EdgeScore> LinkPred::Simp::Predictor::predTopSBM (
    int k,
    int maxIter = 1000,
    long int seed = 0 )
```

Stochastic blocking model.

#### Parameters

|                |                                                                    |
|----------------|--------------------------------------------------------------------|
| <i>k</i>       | Number of edges to be returned (the actual number may be smaller). |
| <i>maxIter</i> | Maximum number of iterations.                                      |
| <i>seed</i>    | Seed of the random number generator.                               |

#### Returns

The top k negative edge scores (the actual size may of the output be smaller than k).

### 9.90.3.89 predTopSHP()

```
std::vector<EdgeScore> LinkPred::Simp::Predictor::predTopSHP (
    int k,
    long int seed = 0 )
```

Shortest path predictor.

#### Parameters

|             |                                                                    |
|-------------|--------------------------------------------------------------------|
| <i>k</i>    | Number of edges to be returned (the actual number may be smaller). |
| <i>seed</i> | The random number generator seed.                                  |

#### Returns

The top k negative edge scores (the actual size may of the output be smaller than k).

### 9.90.3.90 predTopSOI()

```
std::vector<EdgeScore> LinkPred::Simp::Predictor::predTopSOI (
    int k )
```

Sorensen index.

**Parameters**

|          |                                                                    |
|----------|--------------------------------------------------------------------|
| <i>k</i> | Number of edges to be returned (the actual number may be smaller). |
|----------|--------------------------------------------------------------------|

**Returns**

The top *k* negative edge scores (the actual size may of the output be smaller than *k*).

The documentation for this class was generated from the following file:

- include/linkpred/simp/[predictor.hpp](#)

## 9.91 LinkPred::PredResults< TestDataT, LPredictorT, ScoresContainerT > Class Template Reference

A class to store and manage prediction results.

```
#include <predresults.hpp>
```

**Classes**

- class [ScoreIterator](#)  
*Score iterator.*

**Public Types**

- using [ScoresItT](#) = typename ScoresContainerT::iterator

**Public Member Functions**

- [PredResults](#) (TestDataT testData, std::shared\_ptr< LPredictorT > const &predictor)
- [PredResults](#) ([PredResults](#) const &that)=default
- [PredResults](#) & operator= ([PredResults](#) const &that)=default
- [PredResults](#) ([PredResults](#) &&that)=default
- [PredResults](#) & operator= ([PredResults](#) &&that)=default
- void [compPosScores](#) ()
- void [compNegScores](#) ()
- void [compTopScores](#) (std::size\_t l)
- auto [posBegin](#) () const
- auto [posEnd](#) () const
- auto [negBegin](#) () const
- auto [negEnd](#) () const
- auto [posStrmBegin](#) () const
- auto [posStrmEnd](#) () const
- auto [negStrmBegin](#) () const
- auto [negStrmEnd](#) () const
- auto [topBegin](#) () const



- auto [topEnd](#) () const
- auto [topEdgesBegin](#) () const
- auto [topEdgesEnd](#) () const
- bool [isNegComputed](#) () const
- [SortOrder](#) [getNegSortOrder](#) () const
- void [sortNeg](#) ([SortOrder](#) negSortOrder)
- bool [isPosComputed](#) () const
- [SortOrder](#) [getPosSortOrder](#) () const
- void [sortPos](#) ([SortOrder](#) posSortOrder)
- bool [isTopComputed](#) () const
- const std::shared\_ptr< LPredictorT > & [getPredictor](#) () const
- TestDataT & [getTestData](#) ()
- std::size\_t [getNbTop](#) () const
- virtual [~PredResults](#) ()=default

### 9.91.1 Detailed Description

```
template<typename TestDataT = TestData<>, typename LPredictorT = ULPredictor<>, typename ScoresContainerT = std::vector<double>>
class LinkPred::PredResults< TestDataT, LPredictorT, ScoresContainerT >
```

A class to store and manage prediction results.

Template Parameters

|                         |                                       |
|-------------------------|---------------------------------------|
| <i>TestDataT</i>        | The test data type.                   |
| <i>LPredictorT</i>      | The link predictor type.              |
| <i>ScoresContainerT</i> | The type of container storing scores. |

### 9.91.2 Member Typedef Documentation

#### 9.91.2.1 ScoresItT

```
template<typename TestDataT = TestData<>, typename LPredictorT = ULPredictor<>, typename
ScoresContainerT = std::vector<double>>
using LinkPred::PredResults< TestDataT, LPredictorT, ScoresContainerT >::ScoresItT = typename
ScoresContainerT::iterator
```

Scores iterator type.

### 9.91.3 Constructor & Destructor Documentation

**9.91.3.1 PredResults()** [1/3]

```
template<typename TestDataT = TestData<>, typename LPredictorT = ULPredictor<>, typename
ScoresContainerT = std::vector<double>>
LinkPred::PredResults< TestDataT, LPredictorT, ScoresContainerT >::PredResults (
    TestDataT testData,
    std::shared_ptr< LPredictorT > const & predictor ) [inline]
```

Constructor.

**Parameters**

|                  |                 |
|------------------|-----------------|
| <i>testData</i>  | The test data.  |
| <i>predictor</i> | Link predictor. |

**9.91.3.2 PredResults()** [2/3]

```
template<typename TestDataT = TestData<>, typename LPredictorT = ULPredictor<>, typename
ScoresContainerT = std::vector<double>>
LinkPred::PredResults< TestDataT, LPredictorT, ScoresContainerT >::PredResults (
    PredResults< TestDataT, LPredictorT, ScoresContainerT > const & that ) [default]
```

Copy constructor.

**Parameters**

|             |                     |
|-------------|---------------------|
| <i>that</i> | The object to copy. |
|-------------|---------------------|

**9.91.3.3 PredResults()** [3/3]

```
template<typename TestDataT = TestData<>, typename LPredictorT = ULPredictor<>, typename
ScoresContainerT = std::vector<double>>
LinkPred::PredResults< TestDataT, LPredictorT, ScoresContainerT >::PredResults (
    PredResults< TestDataT, LPredictorT, ScoresContainerT > && that ) [default]
```

Move constructor.

**Parameters**

|             |                     |
|-------------|---------------------|
| <i>that</i> | The object to move. |
|-------------|---------------------|

**9.91.3.4 ~PredResults()**

```
template<typename TestDataT = TestData<>, typename LPredictorT = ULPredictor<>, typename
```

```
ScoresContainerT = std::vector<double>>
virtual LinkPred::PredResults< TestDataT, LPredictorT, ScoresContainerT >::~PredResults ( )
[virtual], [default]
```

Destructor.

## 9.91.4 Member Function Documentation

### 9.91.4.1 compNegScores()

```
template<typename TestDataT = TestData<>, typename LPredictorT = ULPredictor<>, typename
ScoresContainerT = std::vector<double>>
void LinkPred::PredResults< TestDataT, LPredictorT, ScoresContainerT >::compNegScores ( )
[inline]
```

Compute scores for negative links.

### 9.91.4.2 compPosScores()

```
template<typename TestDataT = TestData<>, typename LPredictorT = ULPredictor<>, typename
ScoresContainerT = std::vector<double>>
void LinkPred::PredResults< TestDataT, LPredictorT, ScoresContainerT >::compPosScores ( )
[inline]
```

Compute scores for positive links.

### 9.91.4.3 compTopScores()

```
template<typename TestDataT = TestData<>, typename LPredictorT = ULPredictor<>, typename
ScoresContainerT = std::vector<double>>
void LinkPred::PredResults< TestDataT, LPredictorT, ScoresContainerT >::compTopScores (
    std::size_t l ) [inline]
```

Compute top scores. This method finds the negative edges with the highest scores.

#### Parameters

|   |                                 |
|---|---------------------------------|
| / | Number of top links to compute. |
|---|---------------------------------|

### 9.91.4.4 getNbTop()

```
template<typename TestDataT = TestData<>, typename LPredictorT = ULPredictor<>, typename
ScoresContainerT = std::vector<double>>
std::size_t LinkPred::PredResults< TestDataT, LPredictorT, ScoresContainerT >::getNbTop ( )
const [inline]
```

**Returns**

The number of computed top edges.

**9.91.4.5 getNegSortOrder()**

```
template<typename TestDataT = TestData<>, typename LPredictorT = ULPredictor<>, typename
ScoresContainerT = std::vector<double>>
SortOrder LinkPred::PredResults< TestDataT, LPredictorT, ScoresContainerT >::getNegSortOrder (
) const [inline]
```

**Returns**

The sorting order of the negative scores.

**9.91.4.6 getPosSortOrder()**

```
template<typename TestDataT = TestData<>, typename LPredictorT = ULPredictor<>, typename
ScoresContainerT = std::vector<double>>
SortOrder LinkPred::PredResults< TestDataT, LPredictorT, ScoresContainerT >::getPosSortOrder (
) const [inline]
```

**Returns**

The sorting order of the positive scores. }

**9.91.4.7 getPredictor()**

```
template<typename TestDataT = TestData<>, typename LPredictorT = ULPredictor<>, typename
ScoresContainerT = std::vector<double>>
const std::shared_ptr<LPredictorT>& LinkPred::PredResults< TestDataT, LPredictorT, Scores↵
ContainerT >::getPredictor ( ) const [inline]
```

**Returns**

The link predictor.

#### 9.91.4.8 getTestData()

```
template<typename TestDataT = TestData<>, typename LPredictorT = ULPredictor<>, typename
ScoresContainerT = std::vector<double>>
TestDataT& LinkPred::PredResults< TestDataT, LPredictorT, ScoresContainerT >::getTestData ( )
[inline]
```

##### Returns

The test data.

#### 9.91.4.9 isNegComputed()

```
template<typename TestDataT = TestData<>, typename LPredictorT = ULPredictor<>, typename
ScoresContainerT = std::vector<double>>
bool LinkPred::PredResults< TestDataT, LPredictorT, ScoresContainerT >::isNegComputed ( )
const [inline]
```

##### Returns

Whether the negative scores have been computed.

#### 9.91.4.10 isPosComputed()

```
template<typename TestDataT = TestData<>, typename LPredictorT = ULPredictor<>, typename
ScoresContainerT = std::vector<double>>
bool LinkPred::PredResults< TestDataT, LPredictorT, ScoresContainerT >::isPosComputed ( )
const [inline]
```

##### Returns

Whether the positive scores have been computed.

#### 9.91.4.11 isTopComputed()

```
template<typename TestDataT = TestData<>, typename LPredictorT = ULPredictor<>, typename
ScoresContainerT = std::vector<double>>
bool LinkPred::PredResults< TestDataT, LPredictorT, ScoresContainerT >::isTopComputed ( )
const [inline]
```

##### Returns

Whether the top scores have been computed.

#### 9.91.4.12 negBegin()

```
template<typename TestDataT = TestData<>, typename LPredictorT = ULPredictor<>, typename
ScoresContainerT = std::vector<double>>
auto LinkPred::PredResults< TestDataT, LPredictorT, ScoresContainerT >::negBegin ( ) const
[inline]
```

##### Returns

Iterator to the first element in the scores of negative links.

#### 9.91.4.13 negEnd()

```
template<typename TestDataT = TestData<>, typename LPredictorT = ULPredictor<>, typename
ScoresContainerT = std::vector<double>>
auto LinkPred::PredResults< TestDataT, LPredictorT, ScoresContainerT >::negEnd ( ) const
[inline]
```

##### Returns

Iterator to one-past the last element in the scores of negative links.

#### 9.91.4.14 negStrmBegin()

```
template<typename TestDataT = TestData<>, typename LPredictorT = ULPredictor<>, typename
ScoresContainerT = std::vector<double>>
auto LinkPred::PredResults< TestDataT, LPredictorT, ScoresContainerT >::negStrmBegin ( ) const
[inline]
```

##### Returns

Iterator to the first element in the scores of negative links. The scores here may be streamed and not pre-computed.

#### 9.91.4.15 negStrmEnd()

```
template<typename TestDataT = TestData<>, typename LPredictorT = ULPredictor<>, typename
ScoresContainerT = std::vector<double>>
auto LinkPred::PredResults< TestDataT, LPredictorT, ScoresContainerT >::negStrmEnd ( ) const
[inline]
```

##### Returns

Iterator to one-past the last element in the scores of negative links. The scores here may be streamed and not pre-computed.

**9.91.4.16 operator=()** [1/2]

```
template<typename TestDataT = TestData<>, typename LPredictorT = ULPredictor<>, typename
ScoresContainerT = std::vector<double>>
PredResults& LinkPred::PredResults< TestDataT, LPredictorT, ScoresContainerT >::operator= (
    PredResults< TestDataT, LPredictorT, ScoresContainerT > && that ) [default]
```

Move assignment operator.

## Parameters

|             |                     |
|-------------|---------------------|
| <i>that</i> | The object to move. |
|-------------|---------------------|

**9.91.4.17 operator=()** [2/2]

```
template<typename TestDataT = TestData<>, typename LPredictorT = ULPredictor<>, typename
ScoresContainerT = std::vector<double>>
PredResults& LinkPred::PredResults< TestDataT, LPredictorT, ScoresContainerT >::operator= (
    PredResults< TestDataT, LPredictorT, ScoresContainerT > const & that ) [default]
```

Copy assignment operator.

## Parameters

|             |                     |
|-------------|---------------------|
| <i>that</i> | The object to copy. |
|-------------|---------------------|

**9.91.4.18 posBegin()**

```
template<typename TestDataT = TestData<>, typename LPredictorT = ULPredictor<>, typename
ScoresContainerT = std::vector<double>>
auto LinkPred::PredResults< TestDataT, LPredictorT, ScoresContainerT >::posBegin ( ) const
[inline]
```

## Returns

Iterator to the first element in the scores of positive links.

**9.91.4.19 posEnd()**

```
template<typename TestDataT = TestData<>, typename LPredictorT = ULPredictor<>, typename
ScoresContainerT = std::vector<double>>
auto LinkPred::PredResults< TestDataT, LPredictorT, ScoresContainerT >::posEnd ( ) const
[inline]
```

## Returns

Iterator to one-past the last element in the scores of positive links.



#### 9.91.4.20 posStrmBegin()

```
template<typename TestDataT = TestData<>, typename LPredictorT = ULPredictor<>, typename
ScoresContainerT = std::vector<double>>
auto LinkPred::PredResults< TestDataT, LPredictorT, ScoresContainerT >::posStrmBegin ( ) const
[inline]
```

##### Returns

Iterator to the first element in the scores of positive links. The scores here may be streamed and not pre-computed.

#### 9.91.4.21 posStrmEnd()

```
template<typename TestDataT = TestData<>, typename LPredictorT = ULPredictor<>, typename
ScoresContainerT = std::vector<double>>
auto LinkPred::PredResults< TestDataT, LPredictorT, ScoresContainerT >::posStrmEnd ( ) const
[inline]
```

##### Returns

Iterator to one-past the last element in the scores of positive links. The scores here may be streamed and not pre-computed.

#### 9.91.4.22 sortNeg()

```
template<typename TestDataT = TestData<>, typename LPredictorT = ULPredictor<>, typename
ScoresContainerT = std::vector<double>>
void LinkPred::PredResults< TestDataT, LPredictorT, ScoresContainerT >::sortNeg (
    SortOrder negSortOrder ) [inline]
```

Sort the negative scores.

##### Parameters

|                     |                            |
|---------------------|----------------------------|
| <i>negSortOrder</i> | The request sorting order. |
|---------------------|----------------------------|

#### 9.91.4.23 sortPos()

```
template<typename TestDataT = TestData<>, typename LPredictorT = ULPredictor<>, typename
ScoresContainerT = std::vector<double>>
void LinkPred::PredResults< TestDataT, LPredictorT, ScoresContainerT >::sortPos (
    SortOrder posSortOrder ) [inline]
```

Sort the positive scores.

#### Parameters

|                     |                            |
|---------------------|----------------------------|
| <i>posSortOrder</i> | The request sorting order. |
|---------------------|----------------------------|

#### 9.91.4.24 topBegin()

```
template<typename TestDataT = TestData<>, typename LPredictorT = ULPredictor<>, typename
ScoresContainerT = std::vector<double>>
auto LinkPred::PredResults< TestDataT, LPredictorT, ScoresContainerT >::topBegin ( ) const
[inline]
```

#### Returns

Iterator to the first element in the top scores.

#### 9.91.4.25 topEdgesBegin()

```
template<typename TestDataT = TestData<>, typename LPredictorT = ULPredictor<>, typename
ScoresContainerT = std::vector<double>>
auto LinkPred::PredResults< TestDataT, LPredictorT, ScoresContainerT >::topEdgesBegin ( )
const [inline]
```

#### Returns

Iterator to the first element in the top edges.

#### 9.91.4.26 topEdgesEnd()

```
template<typename TestDataT = TestData<>, typename LPredictorT = ULPredictor<>, typename
ScoresContainerT = std::vector<double>>
auto LinkPred::PredResults< TestDataT, LPredictorT, ScoresContainerT >::topEdgesEnd ( ) const
[inline]
```

#### Returns

Iterator to one-past the last element in the top edges.

#### 9.91.4.27 topEnd()

```
template<typename TestDataT = TestData<>, typename LPredictorT = ULPredictor<>, typename
ScoresContainerT = std::vector<double>>
auto LinkPred::PredResults< TestDataT, LPredictorT, ScoresContainerT >::topEnd ( ) const
[inline]
```

##### Returns

Iterator to one-past the last element in the top scores.

The documentation for this class was generated from the following file:

- include/linkpred/perf/predresults.hpp

## 9.92 LinkPred::Simp::Evaluator::Factory::PSTParams Struct Reference

Parameters of PST.

```
#include <evaluator.hpp>
```

### Public Attributes

- std::string [fileName](#)

#### 9.92.1 Detailed Description

Parameters of PST.

#### 9.92.2 Member Data Documentation

##### 9.92.2.1 fileName

```
std::string LinkPred::Simp::Evaluator::Factory::PSTParams::fileName
```

File containing the scores of all non-exisityng links in the training network.

The documentation for this struct was generated from the following file:

- include/linkpred/simp/evaluator.hpp

## 9.93 LinkPred::RandomGen Class Reference

A random number generator.

```
#include <randomgen.hpp>
```

### Public Member Functions

- [RandomGen](#) ()
- [RandomGen](#) (long int seed)
- [RandomGen](#) ([RandomGen](#) const &that)=default
- [RandomGen](#) & [operator=](#) ([RandomGen](#) const &that)=default
- [RandomGen](#) ([RandomGen](#) &&that)=default
- [RandomGen](#) & [operator=](#) ([RandomGen](#) &&that)=default
- auto [getSeed](#) ()
- auto [getInt](#) ()
- std::size\_t [getUInt](#) (std::size\_t low, std::size\_t high)
- int [getSInt](#) (int low, int high)
- double [getDouble](#) (double low, double high)
- bool [getBool](#) ()
- double [getPL](#) (double minV, double maxV, double gamma)
- unsigned long int [getGeo](#) (double p)
- virtual [~RandomGen](#) ()=default

### 9.93.1 Detailed Description

A random number generator.

This is mainly a wrapper that simplifies access to C++11 random generating classes/methods.

### 9.93.2 Constructor & Destructor Documentation

#### 9.93.2.1 RandomGen() [1/4]

```
LinkPred::RandomGen::RandomGen ( ) [inline]
```

Constructor.

#### 9.93.2.2 RandomGen() [2/4]

```
LinkPred::RandomGen::RandomGen (
    long int seed ) [inline]
```

Constructor with seed.

## Parameters

|             |           |
|-------------|-----------|
| <i>seed</i> | The seed. |
|-------------|-----------|

**9.93.2.3 RandomGen()** [3/4]

```
LinkPred::RandomGen::RandomGen (
    RandomGen const & that ) [default]
```

Copy constructor.

## Parameters

|             |                     |
|-------------|---------------------|
| <i>that</i> | The object to copy. |
|-------------|---------------------|

**9.93.2.4 RandomGen()** [4/4]

```
LinkPred::RandomGen::RandomGen (
    RandomGen && that ) [default]
```

Move constructor.

## Parameters

|             |                     |
|-------------|---------------------|
| <i>that</i> | The object to move. |
|-------------|---------------------|

**9.93.2.5 ~RandomGen()**

```
virtual LinkPred::RandomGen::~~RandomGen ( ) [virtual], [default]
```

Destructor.

**9.93.3 Member Function Documentation****9.93.3.1 getBool()**

```
bool LinkPred::RandomGen::getBool ( ) [inline]
```

## Returns

A uniformly distributed boolean (a fair coin toss).

### 9.93.3.2 getDouble()

```
double LinkPred::RandomGen::getDouble (
    double low,
    double high ) [inline]
```

Generate a uniformly distributed double in the specified interval.

#### Parameters

|             |                                  |
|-------------|----------------------------------|
| <i>low</i>  | The left limit of the interval.  |
| <i>high</i> | The right limit of the interval. |

#### Returns

A double uniformly distributed in the interval [low, high).

### 9.93.3.3 getGeo()

```
unsigned long int LinkPred::RandomGen::getGeo (
    double p ) [inline]
```

#### Parameters

|          |                                                                     |
|----------|---------------------------------------------------------------------|
| <i>p</i> | The probability of success of the associated Bernouli distribution. |
|----------|---------------------------------------------------------------------|

#### Returns

A sample from a geometric distribution.

### 9.93.3.4 getInt()

```
auto LinkPred::RandomGen::getInt ( ) [inline]
```

#### Returns

A random integer.

### 9.93.3.5 getPL()

```
double LinkPred::RandomGen::getPL (
    double minV,
    double maxV,
    double gamma ) [inline]
```

#### Returns

Sample from a power law distribution.

#### Parameters

|              |                                |
|--------------|--------------------------------|
| <i>minV</i>  | The minimum value.             |
| <i>maxV</i>  | The maximum value.             |
| <i>gamma</i> | The exponent of the power law. |

### 9.93.3.6 getSeed()

```
auto LinkPred::RandomGen::getSeed ( ) [inline]
```

#### Returns

The seed.

### 9.93.3.7 getSInt()

```
int LinkPred::RandomGen::getSInt (
    int low,
    int high ) [inline]
```

#### Returns

A random signed integer in the interval [low, high] (inclusive of the boundaries).

#### Parameters

|             |                                  |
|-------------|----------------------------------|
| <i>low</i>  | The lower bound of the interval. |
| <i>high</i> | The upper bound of the interval. |



### 9.93.3.8 getUInt()

```
std::size_t LinkPred::RandomGen::getUInt (
    std::size_t low,
    std::size_t high ) [inline]
```

#### Returns

A random unsigned integer in the interval [low, high] (inclusive of the boundaries).

#### Parameters

|             |                                  |
|-------------|----------------------------------|
| <i>low</i>  | The lower bound of the interval. |
| <i>high</i> | The upper bound of the interval. |

### 9.93.3.9 operator=() [1/2]

```
RandomGen& LinkPred::RandomGen::operator= (
    RandomGen && that ) [default]
```

Move assignment operator.

#### Parameters

|             |                     |
|-------------|---------------------|
| <i>that</i> | The object to move. |
|-------------|---------------------|

### 9.93.3.10 operator=() [2/2]

```
RandomGen& LinkPred::RandomGen::operator= (
    RandomGen const & that ) [default]
```

Copy assignment operator.

#### Parameters

|             |                     |
|-------------|---------------------|
| <i>that</i> | The object to copy. |
|-------------|---------------------|

The documentation for this class was generated from the following file:

- include/linkpred/utis/randomgen.hpp

## 9.94 LinkPred::RndClassifier< InRndIt, OutRndIt, ScoreRndIt > Class Template Reference

Random classifier.

```
#include <rndclassifier.hpp>
```

Inheritance diagram for LinkPred::RndClassifier< InRndIt, OutRndIt, ScoreRndIt >:

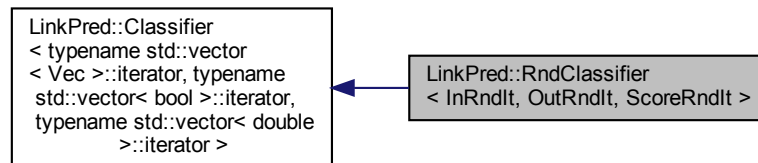

Collaboration diagram for LinkPred::RndClassifier< InRndIt, OutRndIt, ScoreRndIt >:

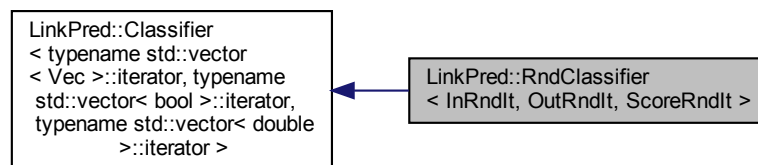

### Public Member Functions

- [RndClassifier](#) (long int seed)
- [RndClassifier](#) ([RndClassifier](#) const &that)=default
- [RndClassifier](#) & [operator=](#) ([RndClassifier](#) const &that)=default
- [RndClassifier](#) ([RndClassifier](#) &&that)=default
- [RndClassifier](#) & [operator=](#) ([RndClassifier](#) &&that)=default
- virtual void [learn](#) (InRndIt trInBegin, InRndIt trInEnd, OutRndIt trOutBegin, OutRndIt trOutEnd)
- virtual void [predict](#) (InRndIt inBegin, InRndIt inEnd, ScoreRndIt scoresBegin)
- virtual [~RndClassifier](#) ()=default

### 9.94.1 Detailed Description

```
template<typename InRndIt = typename std::vector<Vec>::iterator, typename OutRndIt = typename std::vector<bool>::iterator,
typename ScoreRndIt = typename std::vector<double>::iterator>
class LinkPred::RndClassifier< InRndIt, OutRndIt, ScoreRndIt >
```

Random classifier.

## Template Parameters

|                         |                                      |
|-------------------------|--------------------------------------|
| <i>InRndIt</i>          | Input (features) iterator type.      |
| <i>OutRndIt</i>         | Output (class) iterator type.        |
| <i>Score↔<br/>RndIt</i> | Classification scores iterator type. |

## 9.94.2 Constructor &amp; Destructor Documentation

## 9.94.2.1 RndClassifier() [1/3]

```
template<typename InRndIt = typename std::vector<Vec>::iterator, typename OutRndIt = typename
std::vector<bool>::iterator, typename ScoreRndIt = typename std::vector<double>::iterator>
LinkPred::RndClassifier< InRndIt, OutRndIt, ScoreRndIt >::RndClassifier (
    long int seed ) [inline]
```

Constructor.

## Parameters

|             |                                     |
|-------------|-------------------------------------|
| <i>seed</i> | The random number generator's seed. |
|-------------|-------------------------------------|

## 9.94.2.2 RndClassifier() [2/3]

```
template<typename InRndIt = typename std::vector<Vec>::iterator, typename OutRndIt = typename
std::vector<bool>::iterator, typename ScoreRndIt = typename std::vector<double>::iterator>
LinkPred::RndClassifier< InRndIt, OutRndIt, ScoreRndIt >::RndClassifier (
    RndClassifier< InRndIt, OutRndIt, ScoreRndIt > const & that ) [default]
```

Copy constructor.

## Parameters

|             |                     |
|-------------|---------------------|
| <i>that</i> | The object to copy. |
|-------------|---------------------|

## 9.94.2.3 RndClassifier() [3/3]

```
template<typename InRndIt = typename std::vector<Vec>::iterator, typename OutRndIt = typename
std::vector<bool>::iterator, typename ScoreRndIt = typename std::vector<double>::iterator>
```

```
LinkPred::RndClassifier< InRndIt, OutRndIt, ScoreRndIt >::RndClassifier (
    RndClassifier< InRndIt, OutRndIt, ScoreRndIt > && that ) [default]
```

Move constructor.

## Parameters

|             |                     |
|-------------|---------------------|
| <i>that</i> | The object to move. |
|-------------|---------------------|

## 9.94.2.4 ~RndClassifier()

```
template<typename InRndIt = typename std::vector<Vec>::iterator, typename OutRndIt = typename
std::vector<bool>::iterator, typename ScoreRndIt = typename std::vector<double>::iterator>
virtual LinkPred::RndClassifier< InRndIt, OutRndIt, ScoreRndIt >::~~RndClassifier ( ) [virtual],
[default]
```

Destructor.

## 9.94.3 Member Function Documentation

## 9.94.3.1 learn()

```
template<typename InRndIt = typename std::vector<Vec>::iterator, typename OutRndIt = typename
std::vector<bool>::iterator, typename ScoreRndIt = typename std::vector<double>::iterator>
virtual void LinkPred::RndClassifier< InRndIt, OutRndIt, ScoreRndIt >::learn (
    InRndIt trInBegin,
    InRndIt trInEnd,
    OutRndIt trOutBegin,
    OutRndIt trOutEnd ) [virtual]
```

Learn from data.

## Parameters

|                   |                                                         |
|-------------------|---------------------------------------------------------|
| <i>trInBegin</i>  | Iterator to the first example features (input).         |
| <i>trInEnd</i>    | Iterator to one-past-the-last example features (input). |
| <i>trOutBegin</i> | Iterator to the first example class (output).           |
| <i>trOutEnd</i>   | Iterator to one-past-the-last example class (output).   |

## 9.94.3.2 operator=() [1/2]

```
template<typename InRndIt = typename std::vector<Vec>::iterator, typename OutRndIt = typename
std::vector<bool>::iterator, typename ScoreRndIt = typename std::vector<double>::iterator>
RndClassifier& LinkPred::RndClassifier< InRndIt, OutRndIt, ScoreRndIt >::operator= (
    RndClassifier< InRndIt, OutRndIt, ScoreRndIt > && that ) [default]
```

Move assignment operator.

## Parameters

|             |                     |
|-------------|---------------------|
| <i>that</i> | The object to move. |
|-------------|---------------------|

**9.94.3.3 operator=()** [2/2]

```
template<typename InRndIt = typename std::vector<Vec>::iterator, typename OutRndIt = typename
std::vector<bool>::iterator, typename ScoreRndIt = typename std::vector<double>::iterator>
RndClassifier& LinkPred::RndClassifier< InRndIt, OutRndIt, ScoreRndIt >::operator= (
    RndClassifier< InRndIt, OutRndIt, ScoreRndIt > const & that ) [default]
```

Copy assignment operator.

## Parameters

|             |                     |
|-------------|---------------------|
| <i>that</i> | The object to copy. |
|-------------|---------------------|

**9.94.3.4 predict()**

```
template<typename InRndIt = typename std::vector<Vec>::iterator, typename OutRndIt = typename
std::vector<bool>::iterator, typename ScoreRndIt = typename std::vector<double>::iterator>
virtual void LinkPred::RndClassifier< InRndIt, OutRndIt, ScoreRndIt >::predict (
    InRndIt inBegin,
    InRndIt inEnd,
    ScoreRndIt scoresBegin ) [virtual]
```

Predict.

## Parameters

|                    |                                                                  |
|--------------------|------------------------------------------------------------------|
| <i>inBegin</i>     | Iterator to the first instance features (input).                 |
| <i>inEnd</i>       | Iterator to one-past-the-last instance features (input).         |
| <i>scoresBegin</i> | Iterator to the first location where to store prediction scores. |

The documentation for this class was generated from the following file:

- [include/linkpred/ml/classifiers/rndclassifier/rndclassifier.hpp](#)

**9.95 LinkPred::UNetwork< LabelT, NodeIDT, EdgeT >::RndEdgeIt Class Reference**

Randomized edges iterator.

```
#include <unetwork.hpp>
```

Inheritance diagram for LinkPred::UNetwork< LabelT, NodeIDT, EdgeT >::RndEdgelt:

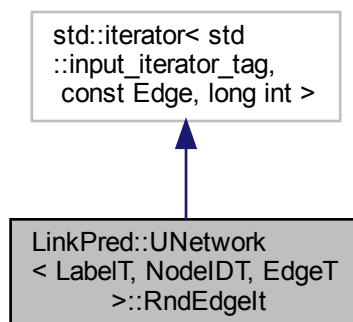

Collaboration diagram for LinkPred::UNetwork< LabelT, NodeIDT, EdgeT >::RndEdgelt:

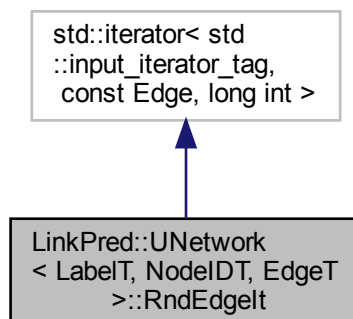

## Public Types

- using [pointer](#) = typename std::iterator< std::input\_iterator\_tag, const [Edge](#), long int >::pointer
- using [reference](#) = typename std::iterator< std::input\_iterator\_tag, const [Edge](#), long int >::reference

## Public Member Functions

- [RndEdgelt](#) ([RndEdgelt](#) const &that)=default
- [RndEdgelt](#) & operator= ([RndEdgelt](#) const &that)=default
- [RndEdgelt](#) ([RndEdgelt](#) &&that)=default
- [RndEdgelt](#) & operator= ([RndEdgelt](#) &&that)=default

- [reference operator\\*](#) () const
- [pointer operator->](#) () const
- [RndEdgeIt & operator++](#) ()
- [RndEdgeIt operator++](#) (int)
- bool [operator==](#) (const [RndEdgeIt](#) &that) const
- bool [operator!=](#) (const [RndEdgeIt](#) &that) const

## Friends

- class [UNetwork](#)

### 9.95.1 Detailed Description

```
template<typename LabelT = std::string, typename NodeIDT = unsigned int, typename EdgeT = unsigned long long int>
class LinkPred::UNetwork< LabelT, NodeIDT, EdgeT >::RndEdgeIt
```

Randomized edges iterator.

This is forward iterator that can be used to randomly sample a subset of the edges.

### 9.95.2 Member Typedef Documentation

#### 9.95.2.1 pointer

```
template<typename LabelT = std::string, typename NodeIDT = unsigned int, typename EdgeT =
unsigned long long int>
using LinkPred::UNetwork< LabelT, NodeIDT, EdgeT >::RndEdgeIt::pointer = typename std::iterator<std::↵
::input_iterator_tag, const Edge, long int>::pointer
```

The pointer type associated with the iterator.

#### 9.95.2.2 reference

```
template<typename LabelT = std::string, typename NodeIDT = unsigned int, typename EdgeT =
unsigned long long int>
using LinkPred::UNetwork< LabelT, NodeIDT, EdgeT >::RndEdgeIt::reference = typename std::↵
::iterator<std::input_iterator_tag, const Edge, long int>::reference
```

The reference type associated with the iterator.

### 9.95.3 Constructor & Destructor Documentation

#### 9.95.3.1 RndEdgeIt() [1/2]

```
template<typename LabelT = std::string, typename NodeIDT = unsigned int, typename EdgeT =
unsigned long long int>
LinkPred::UNetwork< LabelT, NodeIDT, EdgeT >::RndEdgeIt::RndEdgeIt (
    RndEdgeIt const & that ) [default]
```

Copy constructor.



## Parameters

|             |                     |
|-------------|---------------------|
| <i>that</i> | The object to copy. |
|-------------|---------------------|

**9.95.3.2 RndEdgeIt()** [2/2]

```
template<typename LabelT = std::string, typename NodeIDT = unsigned int, typename EdgeT =
unsigned long long int>
LinkPred::UNetwork< LabelT, NodeIDT, EdgeT >::RndEdgeIt::RndEdgeIt (
    RndEdgeIt && that ) [default]
```

Move constructor.

## Parameters

|             |                     |
|-------------|---------------------|
| <i>that</i> | The object to move. |
|-------------|---------------------|

**9.95.4 Member Function Documentation****9.95.4.1 operator!=(())**

```
template<typename LabelT = std::string, typename NodeIDT = unsigned int, typename EdgeT =
unsigned long long int>
bool LinkPred::UNetwork< LabelT, NodeIDT, EdgeT >::RndEdgeIt::operator!=(
    const RndEdgeIt & that ) const [inline]
```

## Parameters

|             |                     |
|-------------|---------------------|
| <i>that</i> | The other iterator. |
|-------------|---------------------|

## Returns

True if this is not equal to that.

**9.95.4.2 operator\*()**

```
template<typename LabelT = std::string, typename NodeIDT = unsigned int, typename EdgeT =
unsigned long long int>
reference LinkPred::UNetwork< LabelT, NodeIDT, EdgeT >::RndEdgeIt::operator* ( ) const [inline]
```

Dereference operator.

**Returns**

A reference to the object to which the iterator points.

**9.95.4.3 operator++() [1/2]**

```
template<typename LabelT = std::string, typename NodeIDT = unsigned int, typename EdgeT =
unsigned long long int>
RndEdgeIt& LinkPred::UNetwork< LabelT, NodeIDT, EdgeT >::RndEdgeIt::operator++ ( ) [inline]
```

Pre-increment operator.

**Returns**

A reference to the new iterator.

**9.95.4.4 operator++() [2/2]**

```
template<typename LabelT = std::string, typename NodeIDT = unsigned int, typename EdgeT =
unsigned long long int>
RndEdgeIt LinkPred::UNetwork< LabelT, NodeIDT, EdgeT >::RndEdgeIt::operator++ (
    int ) [inline]
```

Post-increment operator.

**Returns**

A reference to the new iterator.

**9.95.4.5 operator->()**

```
template<typename LabelT = std::string, typename NodeIDT = unsigned int, typename EdgeT =
unsigned long long int>
pointer LinkPred::UNetwork< LabelT, NodeIDT, EdgeT >::RndEdgeIt::operator-> ( ) const [inline]
```

Arrow operator.

**Returns**

A pointer to the object to which the iterator points.

**9.95.4.6 operator=() [1/2]**

```
template<typename LabelT = std::string, typename NodeIDT = unsigned int, typename EdgeT =
unsigned long long int>
RndEdgeIt& LinkPred::UNetwork< LabelT, NodeIDT, EdgeT >::RndEdgeIt::operator= (
    RndEdgeIt && that ) [default]
```

Move assignment operator.

## Parameters

|             |                     |
|-------------|---------------------|
| <i>that</i> | The object to move. |
|-------------|---------------------|

## 9.95.4.7 operator=() [2/2]

```
template<typename LabelT = std::string, typename NodeIDT = unsigned int, typename EdgeT =
unsigned long long int>
RndEdgeIt& LinkPred::UNetwork< LabelT, NodeIDT, EdgeT >::RndEdgeIt::operator= (
    RndEdgeIt const & that ) [default]
```

Copy assignment operator.

## Parameters

|             |                     |
|-------------|---------------------|
| <i>that</i> | The object to copy. |
|-------------|---------------------|

## 9.95.4.8 operator==()

```
template<typename LabelT = std::string, typename NodeIDT = unsigned int, typename EdgeT =
unsigned long long int>
bool LinkPred::UNetwork< LabelT, NodeIDT, EdgeT >::RndEdgeIt::operator== (
    const RndEdgeIt & that ) const [inline]
```

## Parameters

|             |                     |
|-------------|---------------------|
| <i>that</i> | The other iterator. |
|-------------|---------------------|

## Returns

True if this equals that.

The documentation for this class was generated from the following file:

- include/linkpred/core/unetwork/[unetwork.hpp](#)

## 9.96 LinkPred::DNetwork< LabelT, NodeIDT, EdgeT >::RndEdgeIt Class Reference

Randomized edges iterator.

```
#include <dnetwork.hpp>
```

Inheritance diagram for LinkPred::DNetwork< LabelT, NodeIDT, EdgeT >::RndEdgelt:

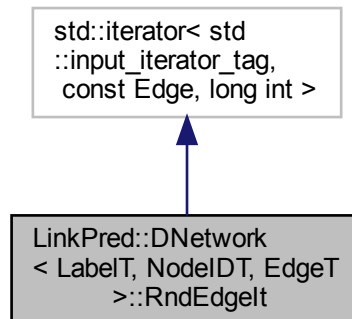

Collaboration diagram for LinkPred::DNetwork< LabelT, NodeIDT, EdgeT >::RndEdgelt:

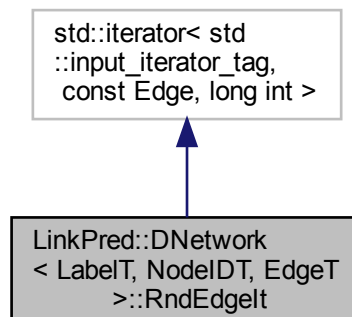

## Public Types

- using [pointer](#) = typename std::iterator< std::input\_iterator\_tag, const [Edge](#), long int >::pointer
- using [reference](#) = typename std::iterator< std::input\_iterator\_tag, const [Edge](#), long int >::reference

## Public Member Functions

- [RndEdgelt](#) ([RndEdgelt](#) const &that)=default
- [RndEdgelt](#) & operator= ([RndEdgelt](#) const &that)=default
- [RndEdgelt](#) ([RndEdgelt](#) &&that)=default
- [RndEdgelt](#) & operator= ([RndEdgelt](#) &&that)=default
- [reference](#) operator\* () const
- [pointer](#) operator-> () const
- [RndEdgelt](#) & operator++ ()
- [RndEdgelt](#) operator++ (int)
- bool operator== (const [RndEdgelt](#) &that) const
- bool operator!= (const [RndEdgelt](#) &that) const

## Friends

- class **DNetwork**

### 9.96.1 Detailed Description

```
template<typename LabelT = std::string, typename NodeIDT = unsigned int, typename EdgeT = unsigned long long int>
class LinkPred::DNetwork< LabelT, NodeIDT, EdgeT >::RndEdgeIt
```

Randomized edges iterator.

This is forward iterator that can be used to randomly sample a subset of the edges.

### 9.96.2 Member Typedef Documentation

#### 9.96.2.1 pointer

```
template<typename LabelT = std::string, typename NodeIDT = unsigned int, typename EdgeT =
unsigned long long int>
using LinkPred::DNetwork< LabelT, NodeIDT, EdgeT >::RndEdgeIt::pointer = typename std::iterator<std::↵
::input_iterator_tag, const Edge, long int>::pointer
```

The pointer type associated with the iterator.

#### 9.96.2.2 reference

```
template<typename LabelT = std::string, typename NodeIDT = unsigned int, typename EdgeT =
unsigned long long int>
using LinkPred::DNetwork< LabelT, NodeIDT, EdgeT >::RndEdgeIt::reference = typename std::↵
::iterator<std::input_iterator_tag, const Edge, long int>::reference
```

The reference type associated with the iterator.

### 9.96.3 Constructor & Destructor Documentation

#### 9.96.3.1 RndEdgeIt() [1/2]

```
template<typename LabelT = std::string, typename NodeIDT = unsigned int, typename EdgeT =
unsigned long long int>
LinkPred::DNetwork< LabelT, NodeIDT, EdgeT >::RndEdgeIt::RndEdgeIt (
    RndEdgeIt const & that ) [default]
```

Copy constructor.

## Parameters

|             |                     |
|-------------|---------------------|
| <i>that</i> | The object to copy. |
|-------------|---------------------|

**9.96.3.2 RndEdgeIt()** [2/2]

```
template<typename LabelT = std::string, typename NodeIDT = unsigned int, typename EdgeT =
unsigned long long int>
LinkPred::DNetwork< LabelT, NodeIDT, EdgeT >::RndEdgeIt::RndEdgeIt (
    RndEdgeIt && that ) [default]
```

Move constructor.

## Parameters

|             |                     |
|-------------|---------------------|
| <i>that</i> | The object to move. |
|-------------|---------------------|

**9.96.4 Member Function Documentation****9.96.4.1 operator!=(())**

```
template<typename LabelT = std::string, typename NodeIDT = unsigned int, typename EdgeT =
unsigned long long int>
bool LinkPred::DNetwork< LabelT, NodeIDT, EdgeT >::RndEdgeIt::operator!=(
    const RndEdgeIt & that ) const [inline]
```

## Parameters

|             |                     |
|-------------|---------------------|
| <i>that</i> | The other iterator. |
|-------------|---------------------|

## Returns

True if this is not equal to that.

**9.96.4.2 operator\*()**

```
template<typename LabelT = std::string, typename NodeIDT = unsigned int, typename EdgeT =
unsigned long long int>
reference LinkPred::DNetwork< LabelT, NodeIDT, EdgeT >::RndEdgeIt::operator* ( ) const [inline]
```

Dereference operator.

**Returns**

A reference to the object to which the iterator points.

**9.96.4.3 operator++() [1/2]**

```
template<typename LabelT = std::string, typename NodeIDT = unsigned int, typename EdgeT =
unsigned long long int>
RndEdgeIt& LinkPred::DNetwork< LabelT, NodeIDT, EdgeT >::RndEdgeIt::operator++ ( ) [inline]
```

Pre-increment operator.

**Returns**

A reference to the new iterator.

**9.96.4.4 operator++() [2/2]**

```
template<typename LabelT = std::string, typename NodeIDT = unsigned int, typename EdgeT =
unsigned long long int>
RndEdgeIt LinkPred::DNetwork< LabelT, NodeIDT, EdgeT >::RndEdgeIt::operator++ (
    int ) [inline]
```

Post-increment operator.

**Returns**

A reference to the new iterator.

**9.96.4.5 operator->()**

```
template<typename LabelT = std::string, typename NodeIDT = unsigned int, typename EdgeT =
unsigned long long int>
pointer LinkPred::DNetwork< LabelT, NodeIDT, EdgeT >::RndEdgeIt::operator-> ( ) const [inline]
```

Arrow operator.

**Returns**

A pointer to the object to which the iterator points.

**9.96.4.6 operator=( ) [1/2]**

```
template<typename LabelT = std::string, typename NodeIDT = unsigned int, typename EdgeT =
unsigned long long int>
RndEdgeIt& LinkPred::DNetwork< LabelT, NodeIDT, EdgeT >::RndEdgeIt::operator= (
    RndEdgeIt && that ) [default]
```

Move assignment operator.

## Parameters

|             |                     |
|-------------|---------------------|
| <i>that</i> | The object to move. |
|-------------|---------------------|

**9.96.4.7 operator=()** [2/2]

```
template<typename LabelT = std::string, typename NodeIDT = unsigned int, typename EdgeT =
unsigned long long int>
RndEdgeIt& LinkPred::DNetwork< LabelT, NodeIDT, EdgeT >::RndEdgeIt::operator= (
    RndEdgeIt const & that ) [default]
```

Copy assignment operator.

## Parameters

|             |                     |
|-------------|---------------------|
| <i>that</i> | The object to copy. |
|-------------|---------------------|

**9.96.4.8 operator==()**

```
template<typename LabelT = std::string, typename NodeIDT = unsigned int, typename EdgeT =
unsigned long long int>
bool LinkPred::DNetwork< LabelT, NodeIDT, EdgeT >::RndEdgeIt::operator== (
    const RndEdgeIt & that ) const [inline]
```

## Parameters

|             |                     |
|-------------|---------------------|
| <i>that</i> | The other iterator. |
|-------------|---------------------|

## Returns

True if this equals that.

The documentation for this class was generated from the following file:

- [include/linkpred/core/dnetwork/dnetwork.hpp](#)

## 9.97 LinkPred::DNetwork< LabelT, NodeIDT, EdgeT >::RndNodeIt Class Reference

Randomized Nodes iterator.

```
#include <dnetwork.hpp>
```



Inheritance diagram for LinkPred::DNetwork< LabelT, NodeIDT, EdgeT >::RndNodeIt:

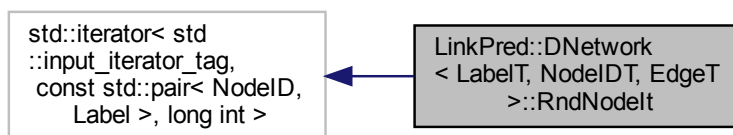

Collaboration diagram for LinkPred::DNetwork< LabelT, NodeIDT, EdgeT >::RndNodeIt:

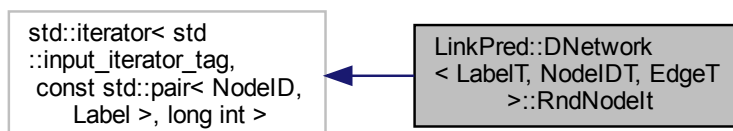

## Public Types

- using [pointer](#) = typename std::iterator< std::input\_iterator\_tag, const std::pair< [NodeID](#), [Label](#) >, long int >::pointer
- using [reference](#) = typename std::iterator< std::input\_iterator\_tag, const std::pair< [NodeID](#), [Label](#) >, long int >::reference

## Public Member Functions

- [RndNodeIt](#) ([RndNodeIt](#) const &that)=default
- [RndNodeIt](#) & [operator=](#) ([RndNodeIt](#) const &that)=default
- [RndNodeIt](#) ([RndNodeIt](#) &&that)=default
- [RndNodeIt](#) & [operator=](#) ([RndNodeIt](#) &&that)=default
- [reference](#) [operator\\*](#) () const
- [pointer](#) [operator->](#) () const
- [RndNodeIt](#) & [operator++](#) ()
- [RndNodeIt](#) [operator++](#) (int)
- bool [operator==](#) (const [RndNodeIt](#) &that) const
- bool [operator!=](#) (const [RndNodeIt](#) &that) const

## Friends

- class **DNetwork**

### 9.97.1 Detailed Description

```
template<typename LabelT = std::string, typename NodeIDT = unsigned int, typename EdgeT = unsigned long long int>
class LinkPred::DNetwork< LabelT, NodeIDT, EdgeT >::RndNodeIt
```

Randomized Nodes iterator.

This is forward iterator that can be used to randomly sample a subset of the nodes.

### 9.97.2 Member Typedef Documentation

#### 9.97.2.1 pointer

```
template<typename LabelT = std::string, typename NodeIDT = unsigned int, typename EdgeT =
unsigned long long int>
using LinkPred::DNetwork< LabelT, NodeIDT, EdgeT >::RndNodeIt::pointer = typename std::iterator<std::↵
::input_iterator_tag, const std::pair<NodeID, Label>, long int>::pointer
```

The pointer type associated with the iterator.

#### 9.97.2.2 reference

```
template<typename LabelT = std::string, typename NodeIDT = unsigned int, typename EdgeT =
unsigned long long int>
using LinkPred::DNetwork< LabelT, NodeIDT, EdgeT >::RndNodeIt::reference = typename std::↵
::iterator<std::input_iterator_tag, const std::pair<NodeID, Label>, long int>::reference
```

The reference type associated with the iterator.

### 9.97.3 Constructor & Destructor Documentation

#### 9.97.3.1 RndNodeIt() [1/2]

```
template<typename LabelT = std::string, typename NodeIDT = unsigned int, typename EdgeT =
unsigned long long int>
LinkPred::DNetwork< LabelT, NodeIDT, EdgeT >::RndNodeIt::RndNodeIt (
    RndNodeIt const & that ) [default]
```

Copy constructor.

Parameters

|             |                     |
|-------------|---------------------|
| <i>that</i> | The object to copy. |
|-------------|---------------------|

### 9.97.3.2 RndNodeIt() [2/2]

```
template<typename LabelT = std::string, typename NodeIDT = unsigned int, typename EdgeT =
unsigned long long int>
LinkPred::DNetwork< LabelT, NodeIDT, EdgeT >::RndNodeIt::RndNodeIt (
    RndNodeIt && that ) [default]
```

Move constructor.

#### Parameters

|             |                     |
|-------------|---------------------|
| <i>that</i> | The object to move. |
|-------------|---------------------|

## 9.97.4 Member Function Documentation

### 9.97.4.1 operator!=(())

```
template<typename LabelT = std::string, typename NodeIDT = unsigned int, typename EdgeT =
unsigned long long int>
bool LinkPred::DNetwork< LabelT, NodeIDT, EdgeT >::RndNodeIt::operator!= (
    const RndNodeIt & that ) const [inline]
```

#### Parameters

|             |                     |
|-------------|---------------------|
| <i>that</i> | The other iterator. |
|-------------|---------------------|

#### Returns

True if this is not equal to that.

### 9.97.4.2 operator\*()

```
template<typename LabelT = std::string, typename NodeIDT = unsigned int, typename EdgeT =
unsigned long long int>
reference LinkPred::DNetwork< LabelT, NodeIDT, EdgeT >::RndNodeIt::operator* ( ) const [inline]
```

Dereference operator.

#### Returns

A reference to the object to which the iterator points.

**9.97.4.3 operator++() [1/2]**

```
template<typename LabelT = std::string, typename NodeIDT = unsigned int, typename EdgeT =
unsigned long long int>
RndNodeIt& LinkPred::DNetwork< LabelT, NodeIDT, EdgeT >::RndNodeIt::operator++ ( ) [inline]
```

Pre-increment operator.

**Returns**

A reference to the new iterator.

**9.97.4.4 operator++() [2/2]**

```
template<typename LabelT = std::string, typename NodeIDT = unsigned int, typename EdgeT =
unsigned long long int>
RndNodeIt LinkPred::DNetwork< LabelT, NodeIDT, EdgeT >::RndNodeIt::operator++ (
int ) [inline]
```

Post-increment operator.

**Returns**

A reference to the new iterator.

**9.97.4.5 operator->()**

```
template<typename LabelT = std::string, typename NodeIDT = unsigned int, typename EdgeT =
unsigned long long int>
pointer LinkPred::DNetwork< LabelT, NodeIDT, EdgeT >::RndNodeIt::operator-> ( ) const [inline]
```

Arrow operator.

**Returns**

A pointer to the object to which the iterator points.

**9.97.4.6 operator=() [1/2]**

```
template<typename LabelT = std::string, typename NodeIDT = unsigned int, typename EdgeT =
unsigned long long int>
RndNodeIt& LinkPred::DNetwork< LabelT, NodeIDT, EdgeT >::RndNodeIt::operator= (
RndNodeIt && that ) [default]
```

Move assignment operator.

## Parameters

|             |                     |
|-------------|---------------------|
| <i>that</i> | The object to move. |
|-------------|---------------------|

**9.97.4.7 operator=()** [2/2]

```
template<typename LabelT = std::string, typename NodeIDT = unsigned int, typename EdgeT =
unsigned long long int>
RndNodeIt& LinkPred::DNetwork< LabelT, NodeIDT, EdgeT >::RndNodeIt::operator= (
    RndNodeIt const & that ) [default]
```

Copy assignment operator.

## Parameters

|             |                     |
|-------------|---------------------|
| <i>that</i> | The object to copy. |
|-------------|---------------------|

**9.97.4.8 operator==()**

```
template<typename LabelT = std::string, typename NodeIDT = unsigned int, typename EdgeT =
unsigned long long int>
bool LinkPred::DNetwork< LabelT, NodeIDT, EdgeT >::RndNodeIt::operator== (
    const RndNodeIt & that ) const [inline]
```

## Parameters

|             |                     |
|-------------|---------------------|
| <i>that</i> | The other iterator. |
|-------------|---------------------|

## Returns

True if this equals that.

The documentation for this class was generated from the following file:

- `include/linkpred/core/dnetwork/dnetwork.hpp`

## 9.98 LinkPred::UNetwork< LabelT, NodeIDT, EdgeT >::RndNodeIt Class Reference

Randomized Nodes iterator.

```
#include <unetwork.hpp>
```

Inheritance diagram for LinkPred::UNetwork< LabelT, NodeIDT, EdgeT >::RndNodeIt:

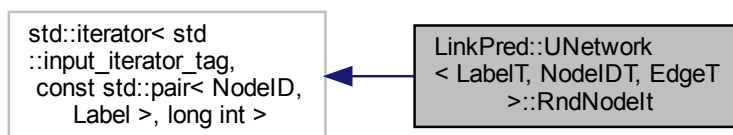

Collaboration diagram for LinkPred::UNetwork< LabelT, NodeIDT, EdgeT >::RndNodeIt:

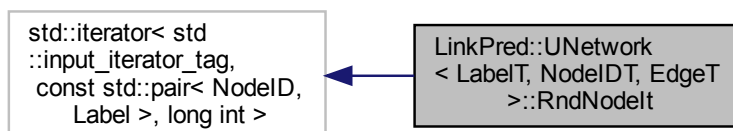

## Public Types

- using [pointer](#) = typename std::iterator< std::input\_iterator\_tag, const std::pair< [NodeID](#), [Label](#) >, long int >::pointer
- using [reference](#) = typename std::iterator< std::input\_iterator\_tag, const std::pair< [NodeID](#), [Label](#) >, long int >::reference

## Public Member Functions

- [RndNodeIt](#) ([RndNodeIt](#) const &that)=default
- [RndNodeIt](#) & [operator=](#) ([RndNodeIt](#) const &that)=default
- [RndNodeIt](#) ([RndNodeIt](#) &&that)=default
- [RndNodeIt](#) & [operator=](#) ([RndNodeIt](#) &&that)=default
- [reference](#) [operator\\*](#) () const
- [pointer](#) [operator->](#) () const
- [RndNodeIt](#) & [operator++](#) ()
- [RndNodeIt](#) [operator++](#) (int)
- bool [operator==](#) (const [RndNodeIt](#) &that) const
- bool [operator!=](#) (const [RndNodeIt](#) &that) const

## Friends

- class **UNetwork**

## 9.98.1 Detailed Description

```
template<typename LabelT = std::string, typename NodeIDT = unsigned int, typename EdgeT = unsigned long long int>
class LinkPred::UNetwork< LabelT, NodeIDT, EdgeT >::RndNodeIt
```

Randomized Nodes iterator.

This is forward iterator that can be used to randomly sample a subset of the nodes.

## 9.98.2 Member Typedef Documentation

### 9.98.2.1 pointer

```
template<typename LabelT = std::string, typename NodeIDT = unsigned int, typename EdgeT =
unsigned long long int>
using LinkPred::UNetwork< LabelT, NodeIDT, EdgeT >::RndNodeIt::pointer = typename std::iterator<std::↵
::input_iterator_tag, const std::pair<NodeID, Label>, long int>::pointer
```

The pointer type associated with the iterator.

### 9.98.2.2 reference

```
template<typename LabelT = std::string, typename NodeIDT = unsigned int, typename EdgeT =
unsigned long long int>
using LinkPred::UNetwork< LabelT, NodeIDT, EdgeT >::RndNodeIt::reference = typename std::↵
::iterator<std::input_iterator_tag, const std::pair<NodeID, Label>, long int>::reference
```

The reference type associated with the iterator.

## 9.98.3 Constructor & Destructor Documentation

### 9.98.3.1 RndNodeIt() [1/2]

```
template<typename LabelT = std::string, typename NodeIDT = unsigned int, typename EdgeT =
unsigned long long int>
LinkPred::UNetwork< LabelT, NodeIDT, EdgeT >::RndNodeIt::RndNodeIt (
    RndNodeIt const & that ) [default]
```

Copy constructor.

Parameters

|             |                     |
|-------------|---------------------|
| <i>that</i> | The object to copy. |
|-------------|---------------------|

### 9.98.3.2 RndNodeIt() [2/2]

```
template<typename LabelT = std::string, typename NodeIDT = unsigned int, typename EdgeT =
unsigned long long int>
LinkPred::UNetwork< LabelT, NodeIDT, EdgeT >::RndNodeIt::RndNodeIt (
    RndNodeIt && that ) [default]
```

Move constructor.

#### Parameters

|             |                     |
|-------------|---------------------|
| <i>that</i> | The object to move. |
|-------------|---------------------|

## 9.98.4 Member Function Documentation

### 9.98.4.1 operator!=(())

```
template<typename LabelT = std::string, typename NodeIDT = unsigned int, typename EdgeT =
unsigned long long int>
bool LinkPred::UNetwork< LabelT, NodeIDT, EdgeT >::RndNodeIt::operator!= (
    const RndNodeIt & that ) const [inline]
```

#### Parameters

|             |                     |
|-------------|---------------------|
| <i>that</i> | The other iterator. |
|-------------|---------------------|

#### Returns

True if this is not equal to that.

### 9.98.4.2 operator\*()

```
template<typename LabelT = std::string, typename NodeIDT = unsigned int, typename EdgeT =
unsigned long long int>
reference LinkPred::UNetwork< LabelT, NodeIDT, EdgeT >::RndNodeIt::operator* ( ) const [inline]
```

Dereference operator.

#### Returns

A reference to the object to which the iterator points.



**9.98.4.3 operator++() [1/2]**

```
template<typename LabelT = std::string, typename NodeIDT = unsigned int, typename EdgeT =
unsigned long long int>
RndNodeIt& LinkPred::UNetwork< LabelT, NodeIDT, EdgeT >::RndNodeIt::operator++ ( ) [inline]
```

Pre-increment operator.

**Returns**

A reference to the new iterator.

**9.98.4.4 operator++() [2/2]**

```
template<typename LabelT = std::string, typename NodeIDT = unsigned int, typename EdgeT =
unsigned long long int>
RndNodeIt LinkPred::UNetwork< LabelT, NodeIDT, EdgeT >::RndNodeIt::operator++ (
int ) [inline]
```

Post-increment operator.

**Returns**

A reference to the new iterator.

**9.98.4.5 operator->()**

```
template<typename LabelT = std::string, typename NodeIDT = unsigned int, typename EdgeT =
unsigned long long int>
pointer LinkPred::UNetwork< LabelT, NodeIDT, EdgeT >::RndNodeIt::operator-> ( ) const [inline]
```

Arrow operator.

**Returns**

A pointer to the object to which the iterator points.

**9.98.4.6 operator=() [1/2]**

```
template<typename LabelT = std::string, typename NodeIDT = unsigned int, typename EdgeT =
unsigned long long int>
RndNodeIt& LinkPred::UNetwork< LabelT, NodeIDT, EdgeT >::RndNodeIt::operator= (
RndNodeIt && that ) [default]
```

Move assignment operator.

## Parameters

|             |                     |
|-------------|---------------------|
| <i>that</i> | The object to move. |
|-------------|---------------------|

**9.98.4.7 operator=()** [2/2]

```
template<typename LabelT = std::string, typename NodeIDT = unsigned int, typename EdgeT =
unsigned long long int>
RndNodeIt& LinkPred::UNetwork< LabelT, NodeIDT, EdgeT >::RndNodeIt::operator= (
    RndNodeIt const & that ) [default]
```

Copy assignment operator.

## Parameters

|             |                     |
|-------------|---------------------|
| <i>that</i> | The object to copy. |
|-------------|---------------------|

**9.98.4.8 operator==()**

```
template<typename LabelT = std::string, typename NodeIDT = unsigned int, typename EdgeT =
unsigned long long int>
bool LinkPred::UNetwork< LabelT, NodeIDT, EdgeT >::RndNodeIt::operator== (
    const RndNodeIt & that ) const [inline]
```

## Parameters

|             |                     |
|-------------|---------------------|
| <i>that</i> | The other iterator. |
|-------------|---------------------|

## Returns

True if this equals that.

The documentation for this class was generated from the following file:

- [include/linkpred/core/unetwork/unetwork.hpp](#)

## 9.99 LinkPred::UNetwork< LabelT, NodeIDT, EdgeT >::RndNonEdgelt Class Reference

Randomized nonedges iterator.

```
#include <unetwork.hpp>
```

Inheritance diagram for LinkPred::UNetwork< LabelT, NodeIDT, EdgeT >::RndNonEdgelt:

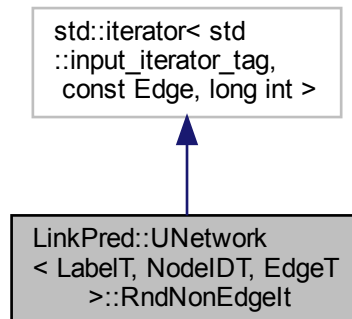

Collaboration diagram for LinkPred::UNetwork< LabelT, NodeIDT, EdgeT >::RndNonEdgelt:

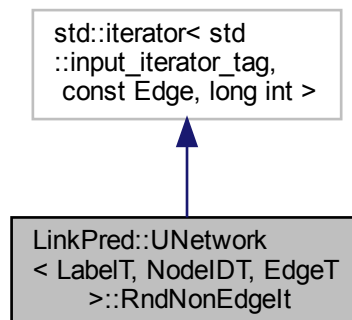

## Public Types

- using [pointer](#) = typename std::iterator< std::input\_iterator\_tag, const [Edge](#), long int >::pointer
- using [reference](#) = typename std::iterator< std::input\_iterator\_tag, const [Edge](#), long int >::reference

## Public Member Functions

- [RndNonEdgelt](#) ([RndNonEdgelt](#) const &that)=default
- [RndNonEdgelt](#) & [operator=](#) ([RndNonEdgelt](#) const &that)=default
- [RndNonEdgelt](#) ([RndNonEdgelt](#) &&that)=default
- [RndNonEdgelt](#) & [operator=](#) ([RndNonEdgelt](#) &&that)=default
- [reference](#) [operator\\*](#) ()
- [pointer](#) [operator->](#) ()
- [RndNonEdgelt](#) & [operator++](#) ()
- [RndNonEdgelt](#) [operator++](#) (int)
- bool [operator==](#) (const [RndNonEdgelt](#) &that) const
- bool [operator!=](#) (const [RndNonEdgelt](#) &that) const

## Friends

- class **UNetwork**

### 9.99.1 Detailed Description

```
template<typename LabelT = std::string, typename NodeIDT = unsigned int, typename EdgeT = unsigned long long int>
class LinkPred::UNetwork< LabelT, NodeIDT, EdgeT >::RndNonEdgeIt
```

Randomized nonedges iterator.

This is forward iterator that can be used to randomly sample a subset of the negative edges.

### 9.99.2 Member Typedef Documentation

#### 9.99.2.1 pointer

```
template<typename LabelT = std::string, typename NodeIDT = unsigned int, typename EdgeT =
unsigned long long int>
using LinkPred::UNetwork< LabelT, NodeIDT, EdgeT >::RndNonEdgeIt::pointer = typename std::
::iterator<std::input_iterator_tag, const Edge, long int>::pointer
```

The pointer type associated with the iterator.

#### 9.99.2.2 reference

```
template<typename LabelT = std::string, typename NodeIDT = unsigned int, typename EdgeT =
unsigned long long int>
using LinkPred::UNetwork< LabelT, NodeIDT, EdgeT >::RndNonEdgeIt::reference = typename std::
::iterator<std::input_iterator_tag, const Edge, long int>::reference
```

The reference type associated with the iterator.

### 9.99.3 Constructor & Destructor Documentation

#### 9.99.3.1 RndNonEdgeIt() [1/2]

```
template<typename LabelT = std::string, typename NodeIDT = unsigned int, typename EdgeT =
unsigned long long int>
LinkPred::UNetwork< LabelT, NodeIDT, EdgeT >::RndNonEdgeIt::RndNonEdgeIt (
    RndNonEdgeIt const & that ) [default]
```

Copy constructor.

## Parameters

|             |                     |
|-------------|---------------------|
| <i>that</i> | The object to copy. |
|-------------|---------------------|

## 9.99.3.2 RndNonEdgeIt() [2/2]

```
template<typename LabelT = std::string, typename NodeIDT = unsigned int, typename EdgeT =
unsigned long long int>
LinkPred::UNetwork< LabelT, NodeIDT, EdgeT >::RndNonEdgeIt::RndNonEdgeIt (
    RndNonEdgeIt && that ) [default]
```

Move constructor.

## Parameters

|             |                     |
|-------------|---------------------|
| <i>that</i> | The object to move. |
|-------------|---------------------|

## 9.99.4 Member Function Documentation

## 9.99.4.1 operator!=(())

```
template<typename LabelT = std::string, typename NodeIDT = unsigned int, typename EdgeT =
unsigned long long int>
bool LinkPred::UNetwork< LabelT, NodeIDT, EdgeT >::RndNonEdgeIt::operator!= (
    const RndNonEdgeIt & that ) const [inline]
```

## Parameters

|             |                     |
|-------------|---------------------|
| <i>that</i> | The other iterator. |
|-------------|---------------------|

## Returns

True if this is not equal to that.

## 9.99.4.2 operator\*()

```
template<typename LabelT = std::string, typename NodeIDT = unsigned int, typename EdgeT =
unsigned long long int>
reference LinkPred::UNetwork< LabelT, NodeIDT, EdgeT >::RndNonEdgeIt::operator* ( ) [inline]
```

Dereference operator.

**Returns**

A reference to the object to which the iterator points.

**9.99.4.3 operator++() [1/2]**

```
template<typename LabelT = std::string, typename NodeIDT = unsigned int, typename EdgeT =
unsigned long long int>
RndNonEdgeIt& LinkPred::UNetwork< LabelT, NodeIDT, EdgeT >::RndNonEdgeIt::operator++ ( )
[inline]
```

Pre-increment operator.

**Returns**

A reference to the new iterator.

**9.99.4.4 operator++() [2/2]**

```
template<typename LabelT = std::string, typename NodeIDT = unsigned int, typename EdgeT =
unsigned long long int>
RndNonEdgeIt LinkPred::UNetwork< LabelT, NodeIDT, EdgeT >::RndNonEdgeIt::operator++ (
int ) [inline]
```

Post-increment operator.

**Returns**

A reference to the new iterator.

**9.99.4.5 operator->()**

```
template<typename LabelT = std::string, typename NodeIDT = unsigned int, typename EdgeT =
unsigned long long int>
pointer LinkPred::UNetwork< LabelT, NodeIDT, EdgeT >::RndNonEdgeIt::operator-> ( ) [inline]
```

Arrow operator.

**Returns**

A pointer to the object to which the iterator points.

**9.99.4.6 operator=() [1/2]**

```
template<typename LabelT = std::string, typename NodeIDT = unsigned int, typename EdgeT =
unsigned long long int>
RndNonEdgeIt& LinkPred::UNetwork< LabelT, NodeIDT, EdgeT >::RndNonEdgeIt::operator= (
RndNonEdgeIt && that ) [default]
```

Move assignment operator.

## Parameters

|             |                     |
|-------------|---------------------|
| <i>that</i> | The object to move. |
|-------------|---------------------|

**9.99.4.7 operator=()** [2/2]

```
template<typename LabelT = std::string, typename NodeIDT = unsigned int, typename EdgeT =
unsigned long long int>
RndNonEdgeIt& LinkPred::UNetwork< LabelT, NodeIDT, EdgeT >::RndNonEdgeIt::operator= (
    RndNonEdgeIt const & that ) [default]
```

Copy assignment operator.

## Parameters

|             |                     |
|-------------|---------------------|
| <i>that</i> | The object to copy. |
|-------------|---------------------|

**9.99.4.8 operator==()**

```
template<typename LabelT = std::string, typename NodeIDT = unsigned int, typename EdgeT =
unsigned long long int>
bool LinkPred::UNetwork< LabelT, NodeIDT, EdgeT >::RndNonEdgeIt::operator== (
    const RndNonEdgeIt & that ) const [inline]
```

## Parameters

|             |                     |
|-------------|---------------------|
| <i>that</i> | The other iterator. |
|-------------|---------------------|

## Returns

True if this equals that.

The documentation for this class was generated from the following file:

- [include/linkpred/core/unetwork/unetwork.hpp](#)

## 9.100 LinkPred::DNetwork< LabelT, NodeIDT, EdgeT >::RndNonEdgeIt Class Reference

Randomized nonedges iterator.

```
#include <dnetwork.hpp>
```

Inheritance diagram for LinkPred::DNetwork< LabelT, NodeIDT, EdgeT >::RndNonEdgelt:

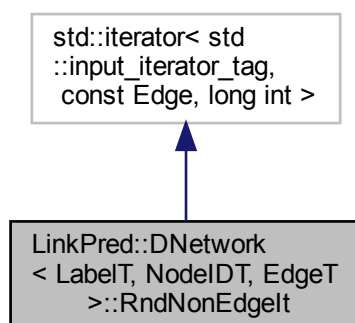

Collaboration diagram for LinkPred::DNetwork< LabelT, NodeIDT, EdgeT >::RndNonEdgelt:

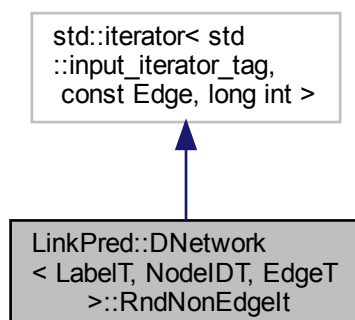

## Public Types

- using [pointer](#) = typename std::iterator< std::input\_iterator\_tag, const [Edge](#), long int >::pointer
- using [reference](#) = typename std::iterator< std::input\_iterator\_tag, const [Edge](#), long int >::reference

## Public Member Functions

- [RndNonEdgelt](#) ([RndNonEdgelt](#) const &that)=default
- [RndNonEdgelt](#) & [operator=](#) ([RndNonEdgelt](#) const &that)=default
- [RndNonEdgelt](#) ([RndNonEdgelt](#) &&that)=default
- [RndNonEdgelt](#) & [operator=](#) ([RndNonEdgelt](#) &&that)=default
- [reference](#) [operator\\*](#) ()
- [pointer](#) [operator->](#) ()
- [RndNonEdgelt](#) & [operator++](#) ()
- [RndNonEdgelt](#) [operator++](#) (int)
- bool [operator==](#) (const [RndNonEdgelt](#) &that) const
- bool [operator!=](#) (const [RndNonEdgelt](#) &that) const



## Friends

- class **DNetwork**

### 9.100.1 Detailed Description

```
template<typename LabelT = std::string, typename NodeIDT = unsigned int, typename EdgeT = unsigned long long int>
class LinkPred::DNetwork< LabelT, NodeIDT, EdgeT >::RndNonEdgeIt
```

Randomized nonedges iterator.

This is forward iterator that can be used to randomly sample a subset of the negative edges.

### 9.100.2 Member Typedef Documentation

#### 9.100.2.1 pointer

```
template<typename LabelT = std::string, typename NodeIDT = unsigned int, typename EdgeT =
unsigned long long int>
using LinkPred::DNetwork< LabelT, NodeIDT, EdgeT >::RndNonEdgeIt::pointer = typename std::
::iterator<std::input_iterator_tag, const Edge, long int>::pointer
```

The pointer type associated with the iterator.

#### 9.100.2.2 reference

```
template<typename LabelT = std::string, typename NodeIDT = unsigned int, typename EdgeT =
unsigned long long int>
using LinkPred::DNetwork< LabelT, NodeIDT, EdgeT >::RndNonEdgeIt::reference = typename std::
::iterator<std::input_iterator_tag, const Edge, long int>::reference
```

The reference type associated with the iterator.

### 9.100.3 Constructor & Destructor Documentation

#### 9.100.3.1 RndNonEdgeIt() [1/2]

```
template<typename LabelT = std::string, typename NodeIDT = unsigned int, typename EdgeT =
unsigned long long int>
LinkPred::DNetwork< LabelT, NodeIDT, EdgeT >::RndNonEdgeIt::RndNonEdgeIt (
    RndNonEdgeIt const & that ) [default]
```

Copy constructor.

## Parameters

|             |                     |
|-------------|---------------------|
| <i>that</i> | The object to copy. |
|-------------|---------------------|

**9.100.3.2 RndNonEdgeIt()** [2/2]

```
template<typename LabelT = std::string, typename NodeIDT = unsigned int, typename EdgeT =
unsigned long long int>
LinkPred::DNetwork< LabelT, NodeIDT, EdgeT >::RndNonEdgeIt::RndNonEdgeIt (
    RndNonEdgeIt && that ) [default]
```

Move constructor.

## Parameters

|             |                     |
|-------------|---------------------|
| <i>that</i> | The object to move. |
|-------------|---------------------|

**9.100.4 Member Function Documentation****9.100.4.1 operator"!="()**

```
template<typename LabelT = std::string, typename NodeIDT = unsigned int, typename EdgeT =
unsigned long long int>
bool LinkPred::DNetwork< LabelT, NodeIDT, EdgeT >::RndNonEdgeIt::operator!= (
    const RndNonEdgeIt & that ) const [inline]
```

## Parameters

|             |                     |
|-------------|---------------------|
| <i>that</i> | The other iterator. |
|-------------|---------------------|

## Returns

True if this is not equal to that.

**9.100.4.2 operator\*()**

```
template<typename LabelT = std::string, typename NodeIDT = unsigned int, typename EdgeT =
unsigned long long int>
reference LinkPred::DNetwork< LabelT, NodeIDT, EdgeT >::RndNonEdgeIt::operator* ( ) [inline]
```

Dereference operator.

**Returns**

A reference to the object to which the iterator points.

**9.100.4.3 operator++() [1/2]**

```
template<typename LabelT = std::string, typename NodeIDT = unsigned int, typename EdgeT =
unsigned long long int>
RndNonEdgeIt& LinkPred::DNetwork< LabelT, NodeIDT, EdgeT >::RndNonEdgeIt::operator++ ( )
[inline]
```

Pre-increment operator.

**Returns**

A reference to the new iterator.

**9.100.4.4 operator++() [2/2]**

```
template<typename LabelT = std::string, typename NodeIDT = unsigned int, typename EdgeT =
unsigned long long int>
RndNonEdgeIt LinkPred::DNetwork< LabelT, NodeIDT, EdgeT >::RndNonEdgeIt::operator++ (
int ) [inline]
```

Post-increment operator.

**Returns**

A reference to the new iterator.

**9.100.4.5 operator->()**

```
template<typename LabelT = std::string, typename NodeIDT = unsigned int, typename EdgeT =
unsigned long long int>
pointer LinkPred::DNetwork< LabelT, NodeIDT, EdgeT >::RndNonEdgeIt::operator-> ( ) [inline]
```

Arrow operator.

**Returns**

A pointer to the object to which the iterator points.

**9.100.4.6 operator=() [1/2]**

```
template<typename LabelT = std::string, typename NodeIDT = unsigned int, typename EdgeT =
unsigned long long int>
RndNonEdgeIt& LinkPred::DNetwork< LabelT, NodeIDT, EdgeT >::RndNonEdgeIt::operator= (
RndNonEdgeIt && that ) [default]
```

Move assignment operator.

## Parameters

|             |                     |
|-------------|---------------------|
| <i>that</i> | The object to move. |
|-------------|---------------------|

**9.100.4.7 operator=()** [2/2]

```
template<typename LabelT = std::string, typename NodeIDT = unsigned int, typename EdgeT =
unsigned long long int>
RndNonEdgeIt& LinkPred::DNetwork< LabelT, NodeIDT, EdgeT >::RndNonEdgeIt::operator= (
    RndNonEdgeIt const & that ) [default]
```

Copy assignment operator.

## Parameters

|             |                     |
|-------------|---------------------|
| <i>that</i> | The object to copy. |
|-------------|---------------------|

**9.100.4.8 operator==()**

```
template<typename LabelT = std::string, typename NodeIDT = unsigned int, typename EdgeT =
unsigned long long int>
bool LinkPred::DNetwork< LabelT, NodeIDT, EdgeT >::RndNonEdgeIt::operator== (
    const RndNonEdgeIt & that ) const [inline]
```

## Parameters

|             |                     |
|-------------|---------------------|
| <i>that</i> | The other iterator. |
|-------------|---------------------|

## Returns

True if this equals that.

The documentation for this class was generated from the following file:

- [include/linkpred/core/dnetwork/dnetwork.hpp](#)

**9.101 LinkPred::Simp::Evaluator::Factory::RNDParams Struct Reference**

Parameters of RND.

```
#include <evaluator.hpp>
```

## Public Attributes

- long int [seed](#) = 0

### 9.101.1 Detailed Description

Parameters of RND.

### 9.101.2 Member Data Documentation

#### 9.101.2.1 seed

```
long int LinkPred::Simp::Evaluator::Factory::RNDParams::seed = 0
```

The random number generator seed for RND.

The documentation for this struct was generated from the following file:

- include/linkpred/simp/[evaluator.hpp](#)

## 9.102 LinkPred::ROC< PredResultsT > Class Template Reference

Receiver Operating Characteristic curve.

```
#include <perfmeasure.hpp>
```

Inheritance diagram for LinkPred::ROC< PredResultsT >:

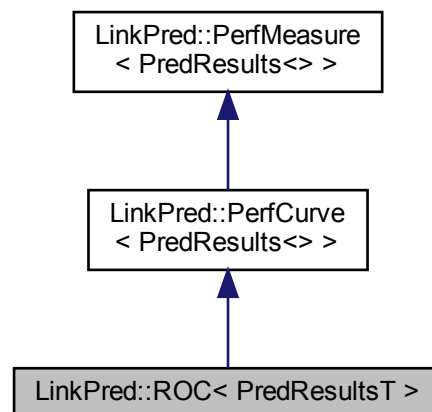

Collaboration diagram for `LinkPred::ROC< PredResultsT >`:

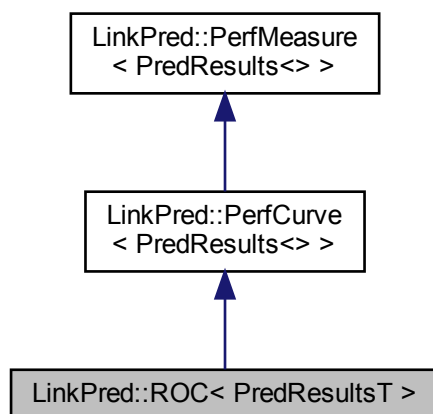

## Public Types

- using `ScoresItT` = typename `PerfMeasure< PredResultsT >::ScoresItT`

## Public Member Functions

- `ROC ()`
- `ROC (std::string name)`
- `ROC (ROC const &that)=default`
- `ROC & operator= (ROC const &that)=default`
- `ROC (ROC &&that)=default`
- `ROC & operator= (ROC &&that)=default`
- `bool isStrmEnabled () const`
- `void setStrmEnabled (bool strmEnabled)`
- `bool isStrmNeg () const`
- `void setStrmNeg (bool strmNeg)`
- `virtual void eval (ScoresItT posScoresBegin, ScoresItT posScoresEnd, ScoresItT negScoresBegin, ScoresItT negScoresEnd, SortOrder &posSortOrder, SortOrder &negSortOrder, PerfResults &results)`
- `virtual void eval (std::shared_ptr< PredResultsT > &predResults, PerfResults &results)`
- `virtual void evalNoStream (std::shared_ptr< PredResultsT > &predResults, PerfResults &results)`
- `template<typename StrmScoresItT, typename StoredScoresItT > double getROCAucStrm (StrmScoresItT strmBegin, StrmScoresItT strmEnd, StoredScoresItT strdBegIn, StoredScoresItT strdEnd)`
- `virtual void evalStream (std::shared_ptr< PredResultsT > &predResults, PerfResults &results)`
- `virtual std::vector< std::pair< double, double > > getCurve (std::shared_ptr< PredResultsT > &predResults)`
- `virtual std::vector< std::pair< double, double > > getCurve (ScoresItT posScoresBegin, ScoresItT posScoresEnd, ScoresItT negScoresBegin, ScoresItT negScoresEnd, SortOrder &posSortOrder, SortOrder &negSortOrder)`
- `virtual ~ROC ()=default`

## Static Public Member Functions

- `template<typename ScoresItT >`  
static double `getROCAuc` (`ScoresItT` posScoresBegin, `ScoresItT` posScoresEnd, `ScoresItT` negScoresBegin, `ScoresItT` negScoresEnd, bool parallel=false)
- `template<typename ScoresItT >`  
static `std::vector< double >` `getThresholds` (`ScoresItT` posScoresBegin, `ScoresItT` posScoresEnd, `ScoresItT` negScoresBegin, `ScoresItT` negScoresEnd)
- `template<typename ScoresItT >`  
static `std::vector< std::pair< double, double > >` `getROCCurve` (`ScoresItT` posScoresBegin, `ScoresItT` posScoresEnd, `ScoresItT` negScoresBegin, `ScoresItT` negScoresEnd, bool parallel=false)

### 9.102.1 Detailed Description

```
template<typename PredResultsT = PredResults<>>
class LinkPred::ROC< PredResultsT >
```

Receiver Operating Characteristic curve.

#### Template Parameters

|                     |                              |
|---------------------|------------------------------|
| <i>PredResultsT</i> | The prediction results type. |
|---------------------|------------------------------|

### 9.102.2 Member Typedef Documentation

#### 9.102.2.1 ScoresItT

```
template<typename PredResultsT = PredResults<>>
using LinkPred::ROC< PredResultsT >::ScoresItT = typename PerfMeasure<PredResultsT>::ScoresItT
```

Scores iterator type.

### 9.102.3 Constructor & Destructor Documentation

#### 9.102.3.1 ROC() [1/4]

```
template<typename PredResultsT = PredResults<>>
LinkPred::ROC< PredResultsT >::ROC ( ) [inline]
```

< The name of the performance measure. Constructor.

#### 9.102.3.2 ROC() [2/4]

```
template<typename PredResultsT = PredResults<>>
LinkPred::ROC< PredResultsT >::ROC (
    std::string name ) [inline]
```

Constructor.

## Parameters

|             |                                      |
|-------------|--------------------------------------|
| <i>name</i> | The name of the performance measure. |
|-------------|--------------------------------------|

**9.102.3.3 ROC()** [3/4]

```
template<typename PredResultsT = PredResults<>>
LinkPred::ROC< PredResultsT >::ROC (
    ROC< PredResultsT > const & that ) [default]
```

Copy constructor.

## Parameters

|             |                     |
|-------------|---------------------|
| <i>that</i> | The object to copy. |
|-------------|---------------------|

**9.102.3.4 ROC()** [4/4]

```
template<typename PredResultsT = PredResults<>>
LinkPred::ROC< PredResultsT >::ROC (
    ROC< PredResultsT > && that ) [default]
```

Move constructor.

## Parameters

|             |                     |
|-------------|---------------------|
| <i>that</i> | The object to move. |
|-------------|---------------------|

**9.102.3.5 ~ROC()**

```
template<typename PredResultsT = PredResults<>>
virtual LinkPred::ROC< PredResultsT >::~~ROC ( ) [virtual], [default]
```

Destructor.

**9.102.4 Member Function Documentation**



**9.102.4.1 eval()** [1/2]

```
template<typename PredResultsT = PredResults<>>
virtual void LinkPred::ROC< PredResultsT >::eval (
    ScoresItT posScoresBegin,
    ScoresItT posScoresEnd,
    ScoresItT negScoresBegin,
    ScoresItT negScoresEnd,
    SortOrder & posSortOrder,
    SortOrder & negSortOrder,
    PerfResults & results ) [inline], [virtual]
```

Computes the area under the ROC curve.

**Parameters**

|                       |                                                                           |
|-----------------------|---------------------------------------------------------------------------|
| <i>posScoresBegin</i> | Iterator to the first positive score.                                     |
| <i>posScoresEnd</i>   | Iterator to one-past-the-last positive score.                             |
| <i>negScoresBegin</i> | Iterator to the first negative score.                                     |
| <i>negScoresEnd</i>   | Iterator to one-past-the-last negative score.                             |
| <i>posSortOrder</i>   | The sorting order of positive scores. This may be modified by the method. |
| <i>negSortOrder</i>   | The sorting order of negative scores. This may be modified by the method. |
| <i>results</i>        | To write results.                                                         |

**9.102.4.2 eval()** [2/2]

```
template<typename PredResultsT = PredResults<>>
virtual void LinkPred::ROC< PredResultsT >::eval (
    std::shared_ptr< PredResultsT > & predResults,
    PerfResults & results ) [inline], [virtual]
```

Computes the area under the ROC curve.

**Parameters**

|                    |                            |
|--------------------|----------------------------|
| <i>predResults</i> | The prediction results.    |
| <i>results</i>     | Iterator to write results. |

**9.102.4.3 evalNoStream()**

```
template<typename PredResultsT = PredResults<>>
virtual void LinkPred::ROC< PredResultsT >::evalNoStream (
    std::shared_ptr< PredResultsT > & predResults,
    PerfResults & results ) [inline], [virtual]
```

Computes the area under the ROC curve.

## Parameters

|                    |                            |
|--------------------|----------------------------|
| <i>predResults</i> | The prediction results.    |
| <i>results</i>     | Iterator to write results. |

**9.102.4.4 evalStream()**

```
template<typename PredResultsT = PredResults<>>
virtual void LinkPred::ROC< PredResultsT >::evalStream (
    std::shared_ptr< PredResultsT > & predResults,
    PerfResults & results ) [inline], [virtual]
```

Computes the area under the **ROC** curve with streaming scores.

## Parameters

|                    |                            |
|--------------------|----------------------------|
| <i>predResults</i> | The prediction results.    |
| <i>results</i>     | Iterator to write results. |

**9.102.4.5 getCurve() [1/2]**

```
template<typename PredResultsT = PredResults<>>
virtual std::vector<std::pair<double, double> > LinkPred::ROC< PredResultsT >::getCurve (
    ScoresItT posScoresBegin,
    ScoresItT posScoresEnd,
    ScoresItT negScoresBegin,
    ScoresItT negScoresEnd,
    SortOrder & posSortOrder,
    SortOrder & negSortOrder ) [inline], [virtual]
```

Computes the **ROC** curve.

## Parameters

|                       |                                                                           |
|-----------------------|---------------------------------------------------------------------------|
| <i>posScoresBegin</i> | Iterator to the first positive score.                                     |
| <i>posScoresEnd</i>   | Iterator to one-past-the-last positive score.                             |
| <i>negScoresBegin</i> | Iterator to the first negative score.                                     |
| <i>negScoresEnd</i>   | Iterator to one-past-the-last negative score.                             |
| <i>posSortOrder</i>   | The sorting order of positive scores. This may be modified by the method. |
| <i>negSortOrder</i>   | The sorting order of negative scores. This may be modified by the method. |

## Returns

A curve in the form of an `std::vector` of pairs representing the x and y coordinates.

**9.102.4.6 getCurve()** [2/2]

```
template<typename PredResultsT = PredResults<>>
virtual std::vector<std::pair<double, double> > LinkPred::ROC< PredResultsT >::getCurve (
    std::shared_ptr< PredResultsT > & predResults ) [inline], [virtual]
```

Computes the [ROC](#) curve.

**Parameters**

|                    |                         |
|--------------------|-------------------------|
| <i>predResults</i> | The prediction results. |
|--------------------|-------------------------|

**Returns**

A curve in the form of an `std::vector` of pairs representing the x and y coordinates.

**9.102.4.7 getROCAuc()**

```
template<typename PredResultsT = PredResults<>>
template<typename ScoresItT >
static double LinkPred::ROC< PredResultsT >::getROCAuc (
    ScoresItT posScoresBegin,
    ScoresItT posScoresEnd,
    ScoresItT negScoresBegin,
    ScoresItT negScoresEnd,
    bool parallel = false ) [inline], [static]
```

Compute the area under the [ROC](#) curve. The smallest range must be sorted in increasing order (in case of a tie, the false negative ranges must be sorted).

**Parameters**

|                       |                                               |
|-----------------------|-----------------------------------------------|
| <i>posScoresBegin</i> | Iterator to the first positive score.         |
| <i>posScoresEnd</i>   | Iterator to one-past-the-last positive score. |
| <i>negScoresBegin</i> | Iterator to the first negative score.         |
| <i>negScoresEnd</i>   | Iterator to one-past-the-last negative score. |
| <i>parallel</i>       | Whether to run in parallel.                   |

**Returns**

The area under the [ROC](#) curve.

**9.102.4.8 getROCAucStrm()**

```
template<typename PredResultsT = PredResults<>>
template<typename StrmScoresItT , typename StoredScoresItT >
```

```
double LinkPred::ROC< PredResultsT >::getROCAucStrm (
    StrmScoresItT strmBegin,
    StrmScoresItT strmEnd,
    StoredScoresItT strdBegin,
    StoredScoresItT strdEnd ) [inline]
```

Compute the area under the [ROC](#) curve with streaming. The smallest range must be sorted in increasing order (in case of a tie, the false negative ranges must be sorted).

#### Parameters

|                  |                                               |
|------------------|-----------------------------------------------|
| <i>strmBegin</i> | Iterator to the first streamed score.         |
| <i>strmEnd</i>   | Iterator to one-past-the-last streamed score. |
| <i>strdBegin</i> | Iterator to the first stored score.           |
| <i>strdEnd</i>   | Iterator to one-past-the-last stored score.   |

#### Returns

The area under the [ROC](#) curve.

#### 9.102.4.9 getROCCurve()

```
template<typename PredResultsT = PredResults<>>
template<typename ScoresItT >
static std::vector<std::pair<double, double> > LinkPred::ROC< PredResultsT >::getROCCurve (
    ScoresItT posScoresBegin,
    ScoresItT posScoresEnd,
    ScoresItT negScoresBegin,
    ScoresItT negScoresEnd,
    bool parallel = false ) [inline], [static]
```

Compute the [ROC](#) curve. Both ranges must be sorted.

#### Parameters

|                       |                                               |
|-----------------------|-----------------------------------------------|
| <i>posScoresBegin</i> | Iterator to the first positive score.         |
| <i>posScoresEnd</i>   | Iterator to one-past-the-last positive score. |
| <i>negScoresBegin</i> | Iterator to the first negative score.         |
| <i>negScoresEnd</i>   | Iterator to one-past-the-last negative score. |
| <i>parallel</i>       | Whether to run in parallel.                   |

#### 9.102.4.10 getThresholds()

```
template<typename PredResultsT = PredResults<>>
template<typename ScoresItT >
```

```
static std::vector<double> LinkPred::ROC< PredResultsT >::getThresholds (
    ScoresItT posScoresBegin,
    ScoresItT posScoresEnd,
    ScoresItT negScoresBegin,
    ScoresItT negScoresEnd ) [inline], [static]
```

Compute the threshold of the **ROC** curve. Ranges must be sorted in increasing order.

#### Parameters

|                       |                                               |
|-----------------------|-----------------------------------------------|
| <i>posScoresBegin</i> | Iterator to the first positive score.         |
| <i>posScoresEnd</i>   | Iterator to one-past-the-last positive score. |
| <i>negScoresBegin</i> | Iterator to the first negative score.         |
| <i>negScoresEnd</i>   | Iterator to one-past-the-last negative score. |

#### 9.102.4.11 isStrmEnabled()

```
template<typename PredResultsT = PredResults<>>
bool LinkPred::ROC< PredResultsT >::isStrmEnabled ( ) const [inline]
```

#### Returns

Whether streaming is enabled.

#### 9.102.4.12 isStrmNeg()

```
template<typename PredResultsT = PredResults<>>
bool LinkPred::ROC< PredResultsT >::isStrmNeg ( ) const [inline]
```

#### Returns

Which class to stream. If true negative scores are streamed, else positive scores are. Only used if enableStrm is true.

#### 9.102.4.13 operator=() [1/2]

```
template<typename PredResultsT = PredResults<>>
ROC& LinkPred::ROC< PredResultsT >::operator= (
    ROC< PredResultsT > && that ) [default]
```

Move assignment operator.

## Parameters

|             |                     |
|-------------|---------------------|
| <i>that</i> | The object to move. |
|-------------|---------------------|

**9.102.4.14 operator=()** [2/2]

```
template<typename PredResultsT = PredResults<>>
ROC& LinkPred::ROC< PredResultsT >::operator= (
    ROC< PredResultsT > const & that ) [default]
```

Copy assignment operator.

## Parameters

|             |                     |
|-------------|---------------------|
| <i>that</i> | The object to copy. |
|-------------|---------------------|

**9.102.4.15 setStrmEnabled()**

```
template<typename PredResultsT = PredResults<>>
void LinkPred::ROC< PredResultsT >::setStrmEnabled (
    bool strmEnabled ) [inline]
```

## Parameters

|                    |                              |
|--------------------|------------------------------|
| <i>strmEnabled</i> | Whether to enable streaming. |
|--------------------|------------------------------|

**9.102.4.16 setStrmNeg()**

```
template<typename PredResultsT = PredResults<>>
void LinkPred::ROC< PredResultsT >::setStrmNeg (
    bool strmNeg ) [inline]
```

Set which class to stream. If true negative scores are streamed, else positive scores are. Only used if enableStrm is true.

## Parameters

|                |                                                                                                  |
|----------------|--------------------------------------------------------------------------------------------------|
| <i>strmNeg</i> | If true negative scores are streamed, else positive scores are. Only used if enableStrm is true. |
|----------------|--------------------------------------------------------------------------------------------------|

The documentation for this class was generated from the following file:

- include/linkpred/perf/perfmeasure.hpp

## 9.103 LinkPred::Simp::Evaluator::Factory::SBMPParams Struct Reference

Parameters of SBM.

```
#include <evaluator.hpp>
```

### Public Attributes

- int [maxIter](#) = 1000
- long int [seed](#) = 0

### 9.103.1 Detailed Description

Parameters of SBM.

### 9.103.2 Member Data Documentation

#### 9.103.2.1 maxIter

```
int LinkPred::Simp::Evaluator::Factory::SBMPParams::maxIter = 1000
```

Max iterations for SBM.

#### 9.103.2.2 seed

```
long int LinkPred::Simp::Evaluator::Factory::SBMPParams::seed = 0
```

Seed for SBM.

The documentation for this struct was generated from the following file:

- [include/linkpred/simp/evaluator.hpp](#)

## 9.104 LinkPred::PredResults< TestDataT, LPredictorT, ScoresContainerT >::ScoreIterator Class Reference

Score iterator.

```
#include <predresults.hpp>
```

Inheritance diagram for LinkPred::PredResults< TestDataT, LPredictorT, ScoresContainerT >::ScoreIterator:

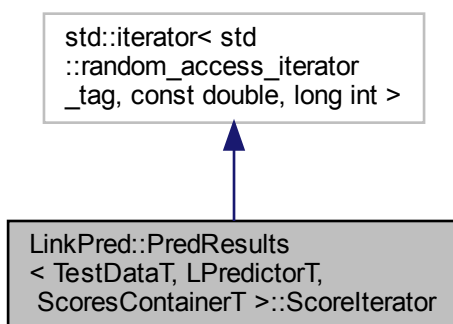

Collaboration diagram for LinkPred::PredResults< TestDataT, LPredictorT, ScoresContainerT >::ScoreIterator:

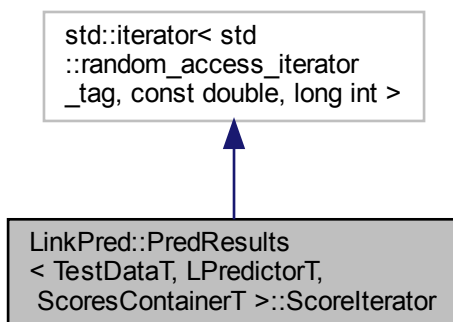

### Public Types

- using [pointer](#) = typename std::iterator< std::random\_access\_iterator\_tag, const std::pair< typename TestDataT::Edge, double >, long int >::pointer
- using [reference](#) = typename std::iterator< std::random\_access\_iterator\_tag, const std::pair< typename TestDataT::Edge, double >, long int >::reference
- using [difference\\_type](#) = typename std::iterator< std::random\_access\_iterator\_tag, const std::pair< typename TestDataT::Edge, double >, long int >::difference\_type



## Public Member Functions

- [ScoreIterator](#) (std::shared\_ptr< LPredictorT > const &predictor, typename TestDataT::TestEdgeT const &eit)
- [ScoreIterator](#) ([ScoreIterator](#) const &that)=default
- [ScoreIterator](#) & [operator=](#) ([ScoreIterator](#) const &that)=default
- [ScoreIterator](#) ([ScoreIterator](#) &&that)=default
- [ScoreIterator](#) & [operator=](#) ([ScoreIterator](#) &&that)=default
- [reference operator\\*](#) ()
- [pointer operator->](#) ()
- [ScoreIterator](#) & [operator++](#) ()
- [ScoreIterator](#) & [operator--](#) ()
- [ScoreIterator](#) [operator++](#) (int)
- [ScoreIterator](#) [operator--](#) (int)
- [ScoreIterator](#) [operator+](#) (const [difference\\_type](#) &n) const
- [ScoreIterator](#) & [operator+=](#) (const [difference\\_type](#) &n)
- [ScoreIterator](#) [operator-](#) (const [difference\\_type](#) &n) const
- [ScoreIterator](#) & [operator-=](#) (const [difference\\_type](#) &n)
- [difference\\_type](#) [operator-](#) (const [ScoreIterator](#) &that) const
- bool [operator==](#) (const [ScoreIterator](#) &that) const
- bool [operator!=](#) (const [ScoreIterator](#) &that) const
- bool [operator<](#) (const [ScoreIterator](#) &that) const
- bool [operator>](#) (const [ScoreIterator](#) &that) const
- bool [operator<=](#) (const [ScoreIterator](#) &that) const
- bool [operator>=](#) (const [ScoreIterator](#) &that) const

## Friends

- class [PredResults](#)

### 9.104.1 Detailed Description

```
template<typename TestDataT = TestData<>, typename LPredictorT = ULPredictor<>, typename ScoresContainerT = std::vector<double>>
class LinkPred::PredResults< TestDataT, LPredictorT, ScoresContainerT >::ScoreIterator
```

Score iterator.

### 9.104.2 Member Typedef Documentation

#### 9.104.2.1 difference\_type

```
template<typename TestDataT = TestData<>, typename LPredictorT = ULPredictor<>, typename
ScoresContainerT = std::vector<double>>
using LinkPred::PredResults< TestDataT, LPredictorT, ScoresContainerT >::ScoreIterator::difference_type
= typename std::iterator<std::random_access_iterator_tag, const std::pair<typename TestDataT::
::Edge, double>, long int>::difference_type
```

The difference type associated with the iterator.

### 9.104.2.2 pointer

```
template<typename TestDataT = TestData<>, typename LPredictorT = ULPredictor<>, typename
ScoresContainerT = std::vector<double>>
using LinkPred::PredResults< TestDataT, LPredictorT, ScoresContainerT >::ScoreIterator::pointer
= typename std::iterator<std::random_access_iterator_tag, const std::pair<typename TestDataT↵
::Edge, double>, long int>::pointer
```

The pointer type associated with the iterator.

### 9.104.2.3 reference

```
template<typename TestDataT = TestData<>, typename LPredictorT = ULPredictor<>, typename
ScoresContainerT = std::vector<double>>
using LinkPred::PredResults< TestDataT, LPredictorT, ScoresContainerT >::ScoreIterator::reference
= typename std::iterator<std::random_access_iterator_tag, const std::pair<typename TestDataT↵
::Edge, double>, long int>::reference
```

The reference type associated with the iterator.

## 9.104.3 Constructor & Destructor Documentation

### 9.104.3.1 ScoreIterator() [1/3]

```
template<typename TestDataT = TestData<>, typename LPredictorT = ULPredictor<>, typename
ScoresContainerT = std::vector<double>>
LinkPred::PredResults< TestDataT, LPredictorT, ScoresContainerT >::ScoreIterator::Score↵
Iterator (
    std::shared_ptr< LPredictorT > const & predictor,
    typename TestDataT::TestEdgeIt const & eit ) [inline]
```

Constructor.

#### Parameters

|                  |                     |
|------------------|---------------------|
| <i>predictor</i> | The link predictor. |
| <i>eit</i>       | Test edge iterator. |

### 9.104.3.2 ScoreIterator() [2/3]

```
template<typename TestDataT = TestData<>, typename LPredictorT = ULPredictor<>, typename
ScoresContainerT = std::vector<double>>
LinkPred::PredResults< TestDataT, LPredictorT, ScoresContainerT >::ScoreIterator::Score↵
Iterator (
    ScoreIterator const & that ) [default]
```

Copy constructor.

## Parameters

|             |                     |
|-------------|---------------------|
| <i>that</i> | The object to copy. |
|-------------|---------------------|

**9.104.3.3 ScoreIterator()** [3/3]

```
template<typename TestDataT = TestData<>, typename LPredictorT = ULPredictor<>, typename
ScoresContainerT = std::vector<double>>
LinkPred::PredResults< TestDataT, LPredictorT, ScoresContainerT >::ScoreIterator::Score↵
Iterator (
    ScoreIterator && that ) [default]
```

Move constructor.

## Parameters

|             |                     |
|-------------|---------------------|
| <i>that</i> | The object to move. |
|-------------|---------------------|

**9.104.4 Member Function Documentation****9.104.4.1 operator"!=()**

```
template<typename TestDataT = TestData<>, typename LPredictorT = ULPredictor<>, typename
ScoresContainerT = std::vector<double>>
bool LinkPred::PredResults< TestDataT, LPredictorT, ScoresContainerT >::ScoreIterator::operator!=
(
    const ScoreIterator & that ) const [inline]
```

## Parameters

|             |                     |
|-------------|---------------------|
| <i>that</i> | The other iterator. |
|-------------|---------------------|

## Returns

True if this is not equal to that.

**9.104.4.2 operator\*()**

```
template<typename TestDataT = TestData<>, typename LPredictorT = ULPredictor<>, typename
ScoresContainerT = std::vector<double>>
reference LinkPred::PredResults< TestDataT, LPredictorT, ScoresContainerT >::ScoreIterator↵
::operator* ( ) [inline]
```

Dereference operator.

### Returns

A reference to the object to which the iterator points.

#### 9.104.4.3 operator+()

```
template<typename TestDataT = TestData<>, typename LPredictorT = ULPredictor<>, typename
ScoresContainerT = std::vector<double>>
ScoreIterator LinkPred::PredResults< TestDataT, LPredictorT, ScoresContainerT >::ScoreIterator←
::operator+ (
    const difference_type & n ) const [inline]
```

Arithmetic + operator.

### Parameters

|     |                  |
|-----|------------------|
| $n$ | Increment value. |
|-----|------------------|

### Returns

The new iterator.

#### 9.104.4.4 operator++() [1/2]

```
template<typename TestDataT = TestData<>, typename LPredictorT = ULPredictor<>, typename
ScoresContainerT = std::vector<double>>
ScoreIterator& LinkPred::PredResults< TestDataT, LPredictorT, ScoresContainerT >::Score←
Iterator::operator++ ( ) [inline]
```

Pre-increment operator.

### Returns

A reference to the new iterator.

#### 9.104.4.5 operator++() [2/2]

```
template<typename TestDataT = TestData<>, typename LPredictorT = ULPredictor<>, typename
ScoresContainerT = std::vector<double>>
ScoreIterator LinkPred::PredResults< TestDataT, LPredictorT, ScoresContainerT >::ScoreIterator←
::operator++ (
    int ) [inline]
```

Post-increment operator.

### Returns

A reference to the new iterator.

**9.104.4.6 operator+=()**

```
template<typename TestDataT = TestData<>, typename LPredictorT = ULPredictor<>, typename
ScoresContainerT = std::vector<double>>>
ScoreIterator& LinkPred::PredResults< TestDataT, LPredictorT, ScoresContainerT >::ScoreIterator::operator+= (
    const difference_type & n ) [inline]
```

Arithmetic += operator.

**Parameters**

|          |                  |
|----------|------------------|
| <i>n</i> | Increment value. |
|----------|------------------|

**Returns**

A reference to the new iterator.

**9.104.4.7 operator-() [1/2]**

```
template<typename TestDataT = TestData<>, typename LPredictorT = ULPredictor<>, typename
ScoresContainerT = std::vector<double>>>
ScoreIterator LinkPred::PredResults< TestDataT, LPredictorT, ScoresContainerT >::ScoreIterator::operator- (
    const difference_type & n ) const [inline]
```

Arithmetic - operator.

**Parameters**

|          |                  |
|----------|------------------|
| <i>n</i> | Decrement value. |
|----------|------------------|

**Returns**

The new iterator.

**9.104.4.8 operator-() [2/2]**

```
template<typename TestDataT = TestData<>, typename LPredictorT = ULPredictor<>, typename
ScoresContainerT = std::vector<double>>>
difference_type LinkPred::PredResults< TestDataT, LPredictorT, ScoresContainerT >::ScoreIterator::operator- (
    const ScoreIterator & that ) const [inline]
```

Difference between the present iterator and the one passed as parameter.

## Parameters

|             |                     |
|-------------|---------------------|
| <i>that</i> | The other iterator. |
|-------------|---------------------|

## Returns

The difference between the current and that iterator.

## 9.104.4.9 operator--() [1/2]

```
template<typename TestDataT = TestData<>, typename LPredictorT = ULPredictor<>, typename
ScoresContainerT = std::vector<double>>
ScoreIterator& LinkPred::PredResults< TestDataT, LPredictorT, ScoresContainerT >::ScoreIterator::operator-- ( ) [inline]
```

Pre-decrement operator.

## Returns

A reference to the new iterator.

## 9.104.4.10 operator--() [2/2]

```
template<typename TestDataT = TestData<>, typename LPredictorT = ULPredictor<>, typename
ScoresContainerT = std::vector<double>>
ScoreIterator LinkPred::PredResults< TestDataT, LPredictorT, ScoresContainerT >::ScoreIterator::operator-- (
    int ) [inline]
```

Post-decrement operator.

## Returns

A reference to the new iterator.

## 9.104.4.11 operator-=( )

```
template<typename TestDataT = TestData<>, typename LPredictorT = ULPredictor<>, typename
ScoresContainerT = std::vector<double>>
ScoreIterator& LinkPred::PredResults< TestDataT, LPredictorT, ScoresContainerT >::ScoreIterator::operator-= (
    const difference_type & n ) [inline]
```

Arithmetic -= operator.

**Parameters**

|          |                  |
|----------|------------------|
| <i>n</i> | Decrement value. |
|----------|------------------|

**Returns**

A reference to the new iterator.

**9.104.4.12 operator->()**

```
template<typename TestDataT = TestData<>, typename LPredictorT = ULPredictor<>, typename
ScoresContainerT = std::vector<double>>
pointer LinkPred::PredResults< TestDataT, LPredictorT, ScoresContainerT >::ScoreIterator←
::operator-> ( ) [inline]
```

Arrow operator.

**Returns**

A pointer to the object to which the iterator points.

**9.104.4.13 operator<()**

```
template<typename TestDataT = TestData<>, typename LPredictorT = ULPredictor<>, typename
ScoresContainerT = std::vector<double>>
bool LinkPred::PredResults< TestDataT, LPredictorT, ScoresContainerT >::ScoreIterator::operator<
(
    const ScoreIterator & that ) const [inline]
```

**Parameters**

|             |                     |
|-------------|---------------------|
| <i>that</i> | The other iterator. |
|-------------|---------------------|

**Returns**

True if this is less than that.

**9.104.4.14 operator<=()**

```
template<typename TestDataT = TestData<>, typename LPredictorT = ULPredictor<>, typename
ScoresContainerT = std::vector<double>>
bool LinkPred::PredResults< TestDataT, LPredictorT, ScoresContainerT >::ScoreIterator::operator<=
(
    const ScoreIterator & that ) const [inline]
```



#### Parameters

|             |                     |
|-------------|---------------------|
| <i>that</i> | The other iterator. |
|-------------|---------------------|

#### Returns

True if this is greater or equal to that.

#### 9.104.4.15 operator=() [1/2]

```
template<typename TestDataT = TestData<>, typename LPredictorT = ULPredictor<>, typename
ScoresContainerT = std::vector<double>>>
ScoreIterator& LinkPred::PredResults< TestDataT, LPredictorT, ScoresContainerT >::ScoreIterator::operator= (
    ScoreIterator && that ) [default]
```

Move assignment operator.

#### Parameters

|             |                     |
|-------------|---------------------|
| <i>that</i> | The object to move. |
|-------------|---------------------|

#### 9.104.4.16 operator=() [2/2]

```
template<typename TestDataT = TestData<>, typename LPredictorT = ULPredictor<>, typename
ScoresContainerT = std::vector<double>>>
ScoreIterator& LinkPred::PredResults< TestDataT, LPredictorT, ScoresContainerT >::ScoreIterator::operator= (
    ScoreIterator const & that ) [default]
```

Copy assignment operator.

#### Parameters

|             |                     |
|-------------|---------------------|
| <i>that</i> | The object to copy. |
|-------------|---------------------|

#### 9.104.4.17 operator==(

```
template<typename TestDataT = TestData<>, typename LPredictorT = ULPredictor<>, typename
ScoresContainerT = std::vector<double>>>
bool LinkPred::PredResults< TestDataT, LPredictorT, ScoresContainerT >::ScoreIterator::operator==
(
    const ScoreIterator & that ) const [inline]
```

**Parameters**

|             |                     |
|-------------|---------------------|
| <i>that</i> | The other iterator. |
|-------------|---------------------|

**Returns**

True if this equals that.

**9.104.4.18 operator>()**

```
template<typename TestDataT = TestData<>, typename LPredictorT = ULPredictor<>, typename
ScoresContainerT = std::vector<double>>
bool LinkPred::PredResults< TestDataT, LPredictorT, ScoresContainerT >::ScoreIterator::operator>
(
    const ScoreIterator & that ) const [inline]
```

**Parameters**

|             |                     |
|-------------|---------------------|
| <i>that</i> | The other iterator. |
|-------------|---------------------|

**Returns**

True if this is greater that.

**9.104.4.19 operator>=()**

```
template<typename TestDataT = TestData<>, typename LPredictorT = ULPredictor<>, typename
ScoresContainerT = std::vector<double>>
bool LinkPred::PredResults< TestDataT, LPredictorT, ScoresContainerT >::ScoreIterator::operator>=
(
    const ScoreIterator & that ) const [inline]
```

**Parameters**

|             |                     |
|-------------|---------------------|
| <i>that</i> | The other iterator. |
|-------------|---------------------|

**Returns**

True if this is less or equal to that.

**9.104.5 Friends And Related Function Documentation**

### 9.104.5.1 PredResults

```
template<typename TestDataT = TestData<>, typename LPredictorT = ULPredictor<>, typename
ScoresContainerT = std::vector<double>>
friend class PredResults [friend]
```

[PredResults](#) is a friend.

The documentation for this class was generated from the following file:

- include/linkpred/perf/[predresults.hpp](#)

## 9.105 LinkPred::Simp::Evaluator::Factory::SHPParams Struct Reference

Parameters of SHP.

```
#include <evaluator.hpp>
```

### Public Attributes

- long int [seed](#) = 0

### 9.105.1 Detailed Description

Parameters of SHP.

### 9.105.2 Member Data Documentation

#### 9.105.2.1 seed

```
long int LinkPred::Simp::Evaluator::Factory::SHPParams::seed = 0
```

The random number generator seed for SHP.

The documentation for this struct was generated from the following file:

- include/linkpred/simp/[evaluator.hpp](#)

## 9.106 LinkPred::SimMeasure Class Reference

Interface of a similarity measure.

```
#include <simmeasure.hpp>
```

Inheritance diagram for LinkPred::SimMeasure:

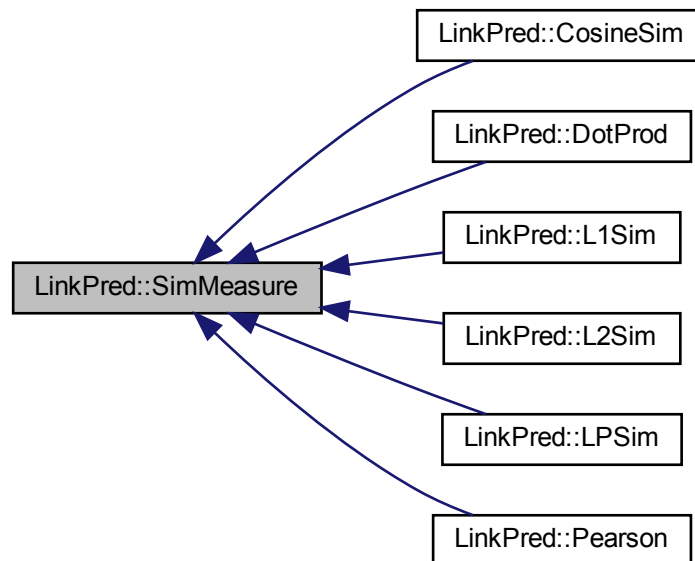

### Public Member Functions

- [SimMeasure](#) ()=default
- [SimMeasure](#) ([SimMeasure](#) const &that)=default
- [SimMeasure](#) & [operator=](#) ([SimMeasure](#) const &that)=default
- [SimMeasure](#) ([SimMeasure](#) &&that)=default
- [SimMeasure](#) & [operator=](#) ([SimMeasure](#) &&that)=default
- virtual double [sim](#) ([Vec](#) const &v1, [Vec](#) const &v2)=0
- const std::string & [getName](#) () const
- void [setName](#) (const std::string &name)
- virtual [~SimMeasure](#) ()=default

### 9.106.1 Detailed Description

Interface of a similarity measure.

### 9.106.2 Constructor & Destructor Documentation

### 9.106.2.1 SimMeasure() [1/3]

```
LinkPred::SimMeasure::SimMeasure ( ) [default]
```

Default constructor.

### 9.106.2.2 SimMeasure() [2/3]

```
LinkPred::SimMeasure::SimMeasure (
    SimMeasure const & that ) [default]
```

Copy constructor.

#### Parameters

|             |                     |
|-------------|---------------------|
| <i>that</i> | The object to copy. |
|-------------|---------------------|

### 9.106.2.3 SimMeasure() [3/3]

```
LinkPred::SimMeasure::SimMeasure (
    SimMeasure && that ) [default]
```

Move constructor.

#### Parameters

|             |                     |
|-------------|---------------------|
| <i>that</i> | The object to move. |
|-------------|---------------------|

### 9.106.2.4 ~SimMeasure()

```
virtual LinkPred::SimMeasure::~~SimMeasure ( ) [virtual], [default]
```

Destructor.

## 9.106.3 Member Function Documentation

### 9.106.3.1 getName()

```
const std::string& LinkPred::SimMeasure::getName ( ) const [inline]
```

#### Returns

The name of the [SimMeasure](#).

### 9.106.3.2 operator=() [1/2]

```
SimMeasure& LinkPred::SimMeasure::operator= (
    SimMeasure && that ) [default]
```

Move assignment operator.

#### Parameters

|             |                     |
|-------------|---------------------|
| <i>that</i> | The object to move. |
|-------------|---------------------|

### 9.106.3.3 operator=() [2/2]

```
SimMeasure& LinkPred::SimMeasure::operator= (
    SimMeasure const & that ) [default]
```

Copy assignment operator.

#### Parameters

|             |                     |
|-------------|---------------------|
| <i>that</i> | The object to copy. |
|-------------|---------------------|

### 9.106.3.4 setName()

```
void LinkPred::SimMeasure::setName (
    const std::string & name ) [inline]
```

Set the name of the [SimMeasure](#).

#### Parameters

|             |                                                  |
|-------------|--------------------------------------------------|
| <i>name</i> | The new name of the <a href="#">SimMeasure</a> . |
|-------------|--------------------------------------------------|

### 9.106.3.5 sim()

```
virtual double LinkPred::SimMeasure::sim (
    Vec const & v1,
    Vec const & v2 ) [pure virtual]
```

Compute the similarity between two vectors.

## Parameters

|           |                                                             |
|-----------|-------------------------------------------------------------|
| <i>v1</i> | First vector.                                               |
| <i>v2</i> | Second vector. Must be of the same dimension as <i>v1</i> . |

## Returns

The similarity between *v1* and *v2*.

Implemented in [LinkPred::LPSim](#), [LinkPred::CosineSim](#), [LinkPred::DotProd](#), [LinkPred::L1Sim](#), [LinkPred::L2Sim](#), and [LinkPred::Pearson](#).

The documentation for this class was generated from the following file:

- [include/linkpred/ml/simmeasures/simmeasure.hpp](#)

## 9.107 LinkPred::TestData< Network, EdgeContT > Class Template Reference

Test data.

```
#include <networkmanipulator.hpp>
```

### Classes

- class [TestEdgelt](#)  
*Test edges iterator.*

### Public Types

- enum [IteratorType](#) { [ECEIT](#), [TPEIT](#), [TNEIT](#) }  
*Enumeration of iterator types.*
- using [NetworkSP](#) = std::shared\_ptr< Network >
- using [NetworkCSP](#) = std::shared\_ptr< const Network >
- using [Edge](#) = typename Network::Edge
- using [NonEdgelt](#) = typename Network::NonEdgelt
- using [Edgelt](#) = typename Network::Edgelt

## Public Member Functions

- [TestData](#) ([NetworkCSP](#) refNet, [NetworkCSP](#) obsNet, std::shared\_ptr< [EdgeContT](#) > remLinks, std::shared\_ptr< [EdgeContT](#) > addLinks, std::shared\_ptr< [EdgeContT](#) > tpLinks, std::shared\_ptr< [EdgeContT](#) > tnLinks, [LinkClass](#) posClass, [LinkClass](#) negClass)
- [TestData](#) ([NetworkCSP](#) refNet, [NetworkCSP](#) obsNet, std::shared\_ptr< [EdgeContT](#) > remLinks, std::shared\_ptr< [EdgeContT](#) > addLinks, std::shared\_ptr< [TestEdgeGen](#)< [Network](#), [EdgeContT](#) >> eg, [LinkClass](#) posClass, [LinkClass](#) negClass)
- void [lock](#) ()
- void [genPos](#) ()
- void [genNeg](#) ()
- [TestData](#) ([TestData](#) const &that)=default
- [TestData](#) & [operator=](#) ([TestData](#) const &that)=default
- [TestData](#) ([TestData](#) &&that)=default
- [TestData](#) & [operator=](#) ([TestData](#) &&that)=default
- auto [getObsNet](#) () const
- auto [getRefNet](#) () const
- auto [posBegin](#) () const
- auto [posEnd](#) () const
- auto [negBegin](#) () const
- auto [negEnd](#) () const
- auto [posStrmBegin](#) () const
- auto [posStrmEnd](#) () const
- auto [negStrmBegin](#) () const
- auto [negStrmEnd](#) () const
- std::size\_t [getNbPos](#) () const
- std::size\_t [getNbNeg](#) () const
- std::shared\_ptr< std::set< [Edge](#) > const > [getRemLinksMap](#) () const
- [LinkClass](#) [getNegClass](#) () const
- [LinkClass](#) [getPosClass](#) () const
- bool [isTnGenerated](#) () const
- bool [isTpGenerated](#) () const
- bool [isLocked](#) () const
- const std::shared\_ptr< [TestEdgeGen](#)< [Network](#), [EdgeContT](#) > > & [getEg](#) () const
- virtual [~TestData](#) ()=default

### 9.107.1 Detailed Description

```
template<typename Network = UNetwork<>, typename EdgeContT = std::vector< typename Network::Edge>>
class LinkPred::TestData< Network, EdgeContT >
```

Test data.

#### Template Parameters

|                  |                                    |
|------------------|------------------------------------|
| <i>Network</i>   | The network type.                  |
| <i>EdgeContT</i> | The container used to store edges. |

### 9.107.2 Member Typedef Documentation



### 9.107.2.1 Edge

```
template<typename Network = UNetwork<>, typename EdgeContT = std::vector< typename Network↵  
::Edge>>  
using LinkPred::TestData< Network, EdgeContT >::Edge = typename Network::Edge
```

The edge type.

### 9.107.2.2 Edgelt

```
template<typename Network = UNetwork<>, typename EdgeContT = std::vector< typename Network↵  
::Edge>>  
using LinkPred::TestData< Network, EdgeContT >::EdgeIt = typename Network::EdgeIt
```

Edge iterator type.

### 9.107.2.3 NetworkCSP

```
template<typename Network = UNetwork<>, typename EdgeContT = std::vector< typename Network↵  
::Edge>>  
using LinkPred::TestData< Network, EdgeContT >::NetworkCSP = std::shared_ptr<const Network>
```

Constant shared pointer to a network.

### 9.107.2.4 NetworkSP

```
template<typename Network = UNetwork<>, typename EdgeContT = std::vector< typename Network↵  
::Edge>>  
using LinkPred::TestData< Network, EdgeContT >::NetworkSP = std::shared_ptr<Network>
```

Shared pointer to a network.

### 9.107.2.5 NonEdgelt

```
template<typename Network = UNetwork<>, typename EdgeContT = std::vector< typename Network↵  
::Edge>>  
using LinkPred::TestData< Network, EdgeContT >::NonEdgeIt = typename Network::NonEdgeIt
```

Negative edge iterator type.

## 9.107.3 Member Enumeration Documentation

### 9.107.3.1 IteratorType

```
template<typename Network = UNetwork<>, typename EdgeContT = std::vector< typename Network↵  
::Edge>>  
enum LinkPred::TestData::IteratorType
```

Enumeration of iterator types.

## Enumerator

|       |                              |
|-------|------------------------------|
| ECEIT | Edge container iterator.     |
| TPEIT | True negative edge iterator. |
| TNEIT | True positive edge iterator. |

## 9.107.4 Constructor & Destructor Documentation

### 9.107.4.1 TestData() [1/4]

```
template<typename Network = UNetwork<>, typename EdgeContT = std::vector< typename Network↔
::Edge>>
LinkPred::TestData< Network, EdgeContT >::TestData (
    NetworkCSP refNet,
    NetworkCSP obsNet,
    std::shared_ptr< EdgeContT > remLinks,
    std::shared_ptr< EdgeContT > addLinks,
    std::shared_ptr< EdgeContT > tpLinks,
    std::shared_ptr< EdgeContT > tnLinks,
    LinkClass posClass,
    LinkClass negClass ) [inline]
```

## Parameters

|                 |                                                                    |
|-----------------|--------------------------------------------------------------------|
| <i>refNet</i>   | The reference network.                                             |
| <i>obsNet</i>   | The network.                                                       |
| <i>remLinks</i> | Removed edges.                                                     |
| <i>addLinks</i> | Added edges.                                                       |
| <i>tpLinks</i>  | True positive links.                                               |
| <i>tnLinks</i>  | True negative links.                                               |
| <i>posClass</i> | The class of edges used as the positive instances in the test set. |
| <i>negClass</i> | The class of edges used as the negative instances in the test set. |

### 9.107.4.2 TestData() [2/4]

```
template<typename Network = UNetwork<>, typename EdgeContT = std::vector< typename Network↔
::Edge>>
LinkPred::TestData< Network, EdgeContT >::TestData (
    NetworkCSP refNet,
    NetworkCSP obsNet,
    std::shared_ptr< EdgeContT > remLinks,
    std::shared_ptr< EdgeContT > addLinks,
    std::shared_ptr< TestEdgeGen< Network, EdgeContT >> eg,
    LinkClass posClass,
    LinkClass negClass ) [inline]
```

## Parameters

|                 |                                                                    |
|-----------------|--------------------------------------------------------------------|
| <i>refNet</i>   | The reference network.                                             |
| <i>obsNet</i>   | The network.                                                       |
| <i>remLinks</i> | Removed edges.                                                     |
| <i>addLinks</i> | Added edges.                                                       |
| <i>eg</i>       | Edge generator.                                                    |
| <i>posClass</i> | The class of edges used as the positive instances in the test set. |
| <i>negClass</i> | The class of edges used as the negative instances in the test set. |

```
eg->template generateTP(std::back_inserter(*tpLinks)); eg->template generateTN(std::back_inserter(*tnLinks));
```

```
tpGenerated = true; tnGenerated = true;
```

**9.107.4.3 TestData()** [3/4]

```
template<typename Network = UNetwork<>, typename EdgeContT = std::vector< typename Network↔
::Edge>>
LinkPred::TestData< Network, EdgeContT >::TestData (
    TestData< Network, EdgeContT > const & that ) [default]
```

Copy constructor.

## Parameters

|             |                     |
|-------------|---------------------|
| <i>that</i> | The object to copy. |
|-------------|---------------------|

**9.107.4.4 TestData()** [4/4]

```
template<typename Network = UNetwork<>, typename EdgeContT = std::vector< typename Network↔
::Edge>>
LinkPred::TestData< Network, EdgeContT >::TestData (
    TestData< Network, EdgeContT > && that ) [default]
```

Move constructor.

## Parameters

|             |                     |
|-------------|---------------------|
| <i>that</i> | The object to move. |
|-------------|---------------------|

**9.107.4.5 ~TestData()**

```
template<typename Network = UNetwork<>, typename EdgeContT = std::vector< typename Network↔
::Edge>>
virtual LinkPred::TestData< Network, EdgeContT >::~~TestData ( ) [virtual], [default]
```

Destructor.

## 9.107.5 Member Function Documentation

### 9.107.5.1 genNeg()

```
template<typename Network = UNetwork<>, typename EdgeContT = std::vector< typename Network↵
::Edge>>
void LinkPred::TestData< Network, EdgeContT >::genNeg ( ) [inline]
```

Generate negative instances.

### 9.107.5.2 genPos()

```
template<typename Network = UNetwork<>, typename EdgeContT = std::vector< typename Network↵
::Edge>>
void LinkPred::TestData< Network, EdgeContT >::genPos ( ) [inline]
```

Generate positive instances.

### 9.107.5.3 getEg()

```
template<typename Network = UNetwork<>, typename EdgeContT = std::vector< typename Network↵
::Edge>>
const std::shared_ptr<TestEdgeGen<Network, EdgeContT> >& LinkPred::TestData< Network, Edge↵
ContT >::getEg ( ) const [inline]
```

#### Returns

Edge generator.

### 9.107.5.4 getNbNeg()

```
template<typename Network = UNetwork<>, typename EdgeContT = std::vector< typename Network↵
::Edge>>
std::size_t LinkPred::TestData< Network, EdgeContT >::getNbNeg ( ) const [inline]
```

#### Returns

Number of negative links in the test set.

### 9.107.5.5 getNbPos()

```
template<typename Network = UNetwork<>, typename EdgeContT = std::vector< typename Network↵
::Edge>>
std::size_t LinkPred::TestData< Network, EdgeContT >::getNbPos ( ) const [inline]
```

#### Returns

Number of positive links in the test set.

### 9.107.5.6 getNegClass()

```
template<typename Network = UNetwork<>, typename EdgeContT = std::vector< typename Network↵
::Edge>>
LinkClass LinkPred::TestData< Network, EdgeContT >::getNegClass ( ) const [inline]
```

#### Returns

negClass.

### 9.107.5.7 getObsNet()

```
template<typename Network = UNetwork<>, typename EdgeContT = std::vector< typename Network↵
::Edge>>
auto LinkPred::TestData< Network, EdgeContT >::getObsNet ( ) const [inline]
```

#### Returns

The observed network.

### 9.107.5.8 getPosClass()

```
template<typename Network = UNetwork<>, typename EdgeContT = std::vector< typename Network↵
::Edge>>
LinkClass LinkPred::TestData< Network, EdgeContT >::getPosClass ( ) const [inline]
```

#### Returns

posClass.

### 9.107.5.9 getRefNet()

```
template<typename Network = UNetwork<>, typename EdgeContT = std::vector< typename Network↔  
::Edge>>  
auto LinkPred::TestData< Network, EdgeContT >::getRefNet ( ) const [inline]
```

#### Returns

The reference network.

### 9.107.5.10 getRemLinksMap()

```
template<typename Network = UNetwork<>, typename EdgeContT = std::vector< typename Network↔  
::Edge>>  
std::shared_ptr<std::set<Edge> const> LinkPred::TestData< Network, EdgeContT >::getRem↔  
LinksMap ( ) const [inline]
```

#### Returns

The removed links in a set.

### 9.107.5.11 isLocked()

```
template<typename Network = UNetwork<>, typename EdgeContT = std::vector< typename Network↔  
::Edge>>  
bool LinkPred::TestData< Network, EdgeContT >::isLocked ( ) const [inline]
```

#### Returns

Whether the test data is locked.

### 9.107.5.12 isTnGenerated()

```
template<typename Network = UNetwork<>, typename EdgeContT = std::vector< typename Network↔  
::Edge>>  
bool LinkPred::TestData< Network, EdgeContT >::isTnGenerated ( ) const [inline]
```

#### Returns

tnGenerated.

#### 9.107.5.13 isTpGenerated()

```
template<typename Network = UNetwork<>, typename EdgeContT = std::vector< typename Network↵
::Edge>>
bool LinkPred::TestData< Network, EdgeContT >::isTpGenerated ( ) const [inline]
```

##### Returns

tpGenerated.

#### 9.107.5.14 lock()

```
template<typename Network = UNetwork<>, typename EdgeContT = std::vector< typename Network↵
::Edge>>
void LinkPred::TestData< Network, EdgeContT >::lock ( ) [inline]
```

Lock the dataset. No modifications can be done on the object after calling this method.

#### 9.107.5.15 negBegin()

```
template<typename Network = UNetwork<>, typename EdgeContT = std::vector< typename Network↵
::Edge>>
auto LinkPred::TestData< Network, EdgeContT >::negBegin ( ) const [inline]
```

##### Returns

An iterator to the first negative link.

#### 9.107.5.16 negEnd()

```
template<typename Network = UNetwork<>, typename EdgeContT = std::vector< typename Network↵
::Edge>>
auto LinkPred::TestData< Network, EdgeContT >::negEnd ( ) const [inline]
```

##### Returns

An iterator to one-past-the-last negative link.

**9.107.5.17 negStrmBegin()**

```
template<typename Network = UNetwork<>, typename EdgeContT = std::vector< typename Network↔
::Edge>>
auto LinkPred::TestData< Network, EdgeContT >::negStrmBegin ( ) const [inline]
```

**Returns**

An iterator to the first negative link. The edges here may be streamed and not pre-generated.

**9.107.5.18 negStrmEnd()**

```
template<typename Network = UNetwork<>, typename EdgeContT = std::vector< typename Network↔
::Edge>>
auto LinkPred::TestData< Network, EdgeContT >::negStrmEnd ( ) const [inline]
```

**Returns**

An iterator to one-past-the-last negative link. The edges here may be streamed and not pre-generated.

**9.107.5.19 operator=() [1/2]**

```
template<typename Network = UNetwork<>, typename EdgeContT = std::vector< typename Network↔
::Edge>>
TestData& LinkPred::TestData< Network, EdgeContT >::operator= (
    TestData< Network, EdgeContT > && that ) [default]
```

Move assignment operator.

**Parameters**

|             |                     |
|-------------|---------------------|
| <i>that</i> | The object to move. |
|-------------|---------------------|

**9.107.5.20 operator=() [2/2]**

```
template<typename Network = UNetwork<>, typename EdgeContT = std::vector< typename Network↔
::Edge>>
TestData& LinkPred::TestData< Network, EdgeContT >::operator= (
    TestData< Network, EdgeContT > const & that ) [default]
```

Copy assignment operator.



#### Parameters

|             |                     |
|-------------|---------------------|
| <i>that</i> | The object to copy. |
|-------------|---------------------|

#### 9.107.5.21 posBegin()

```
template<typename Network = UNetwork<>, typename EdgeContT = std::vector< typename Network↵
::Edge>>
auto LinkPred::TestData< Network, EdgeContT >::posBegin ( ) const [inline]
```

#### Returns

An iterator to the first positive link.

#### 9.107.5.22 posEnd()

```
template<typename Network = UNetwork<>, typename EdgeContT = std::vector< typename Network↵
::Edge>>
auto LinkPred::TestData< Network, EdgeContT >::posEnd ( ) const [inline]
```

#### Returns

An iterator to one-past-the-last positive link.

#### 9.107.5.23 posStrmBegin()

```
template<typename Network = UNetwork<>, typename EdgeContT = std::vector< typename Network↵
::Edge>>
auto LinkPred::TestData< Network, EdgeContT >::posStrmBegin ( ) const [inline]
```

#### Returns

An iterator to the first positive link. The edges here may be streamed and not pre-generated.

### 9.107.5.24 posStrmEnd()

```
template<typename Network = UNetwork<>, typename EdgeContT = std::vector< typename Network::Edge>>
::Edge>>
auto LinkPred::TestData< Network, EdgeContT >::posStrmEnd ( ) const [inline]
```

#### Returns

An iterator to one-past-the-last positive link. The edges here may be streamed and not pre-generated.

The documentation for this class was generated from the following file:

- include/linkpred/perf/networkmanipulator.hpp

## 9.108 LinkPred::TestEdgeGen< Network, EdgeContT > Class Template Reference

Generate true positives and true negatives.

```
#include <networkmanipulator.hpp>
```

### Classes

- class [TNEdgelt](#)  
*TN edges iterator.*
- class [TPEdgelt](#)  
*TP edges iterator.*

### Public Member Functions

- [TestEdgeGen](#) (NetworkCSP refNet, NetworkCSP obsNet, std::shared\_ptr< EdgeContT > remLinks, std::shared\_ptr< EdgeContT > addLinks, bool aTP, double tpRatio, bool aTN, double tnRatio, long int seed)
- [TestEdgeGen](#) ([TestEdgeGen](#) const &that)=default
- [TestEdgeGen](#) & operator= ([TestEdgeGen](#) const &that)=default
- [TestEdgeGen](#) ([TestEdgeGen](#) &&that)=default
- [TestEdgeGen](#) & operator= ([TestEdgeGen](#) &&that)=default
- template<typename OutputEdgeltT = typename std::vector< typename Network::Edge>::iterator> void [generateTP](#) (OutputEdgeltT oit)
- template<typename OutputEdgeltT = typename std::vector< typename Network::Edge>::iterator> void [generateTN](#) (OutputEdgeltT oit)
- auto [tpBegin](#) () const
- auto [tpEnd](#) () const
- auto [tnBegin](#) () const
- auto [tnEnd](#) () const
- virtual [~TestEdgeGen](#) ()=default

### 9.108.1 Detailed Description

```
template<typename Network = UNetwork<>, typename EdgeContT = std::vector< typename Network::Edge>>
class LinkPred::TestEdgeGen< Network, EdgeContT >
```

Generate true positives and true negatives.

## Template Parameters

|                  |                                    |
|------------------|------------------------------------|
| <i>Network</i>   | Network type.                      |
| <i>EdgeContT</i> | The container used to store edges. |

## 9.108.2 Constructor &amp; Destructor Documentation

## 9.108.2.1 TestEdgeGen() [1/3]

```
template<typename Network = UNetwork<>, typename EdgeContT = std::vector< typename Network↵
::Edge>>
LinkPred::TestEdgeGen< Network, EdgeContT >::TestEdgeGen (
    NetworkCSP refNet,
    NetworkCSP obsNet,
    std::shared_ptr< EdgeContT > remLinks,
    std::shared_ptr< EdgeContT > addLinks,
    bool aTP,
    double tpRatio,
    bool aTN,
    double tnRatio,
    long int seed ) [inline]
```

## Parameters

|                 |                                                                                                           |
|-----------------|-----------------------------------------------------------------------------------------------------------|
| <i>refNet</i>   | The reference network.                                                                                    |
| <i>obsNet</i>   | The network.                                                                                              |
| <i>remLinks</i> | Removed edges.                                                                                            |
| <i>addLinks</i> | Added edges.                                                                                              |
| <i>aTP</i>      | Whether to use all true positive links in the test set.                                                   |
| <i>tpRatio</i>  | Ratio of true positive inks to e used in the test set. This parameter is only relevant when aTP is false. |
| <i>aTN</i>      | Whether to use all true negative links in the test set.                                                   |
| <i>tnRatio</i>  | Ratio of true negative inks to e used in the test set. This parameter is only relevant when aTN is false. |
| <i>seed</i>     | The random number generator's seed.                                                                       |

## 9.108.2.2 TestEdgeGen() [2/3]

```
template<typename Network = UNetwork<>, typename EdgeContT = std::vector< typename Network↵
::Edge>>
LinkPred::TestEdgeGen< Network, EdgeContT >::TestEdgeGen (
    TestEdgeGen< Network, EdgeContT > const & that ) [default]
```

Copy constructor.

## Parameters

|             |                     |
|-------------|---------------------|
| <i>that</i> | The object to copy. |
|-------------|---------------------|

**9.108.2.3 TestEdgeGen() [3/3]**

```
template<typename Network = UNetwork<>, typename EdgeContT = std::vector< typename Network↵
::Edge>>
LinkPred::TestEdgeGen< Network, EdgeContT >::TestEdgeGen (
    TestEdgeGen< Network, EdgeContT > && that ) [default]
```

Move constructor.

## Parameters

|             |                     |
|-------------|---------------------|
| <i>that</i> | The object to move. |
|-------------|---------------------|

**9.108.2.4 ~TestEdgeGen()**

```
template<typename Network = UNetwork<>, typename EdgeContT = std::vector< typename Network↵
::Edge>>
virtual LinkPred::TestEdgeGen< Network, EdgeContT >::~~TestEdgeGen ( ) [virtual], [default]
```

Destructor.

**9.108.3 Member Function Documentation****9.108.3.1 generateTN()**

```
template<typename Network = UNetwork<>, typename EdgeContT = std::vector< typename Network↵
::Edge>>
template<typename OutputEdgeItT = typename std::vector< typename Network::Edge>::iterator>
void LinkPred::TestEdgeGen< Network, EdgeContT >::generateTN (
    OutputEdgeItT oit ) [inline]
```

Generate true negative links.

## Template Parameters

|                      |                       |
|----------------------|-----------------------|
| <i>OutputEdgeItT</i> | Iterator write edges. |
|----------------------|-----------------------|

## Parameters

|            |                       |
|------------|-----------------------|
| <i>oit</i> | Output edge iterator. |
|------------|-----------------------|

## 9.108.3.2 generateTP()

```
template<typename Network = UNetwork<>, typename EdgeContT = std::vector< typename Network↵
::Edge>>
template<typename OutputEdgeItT = typename std::vector< typename Network::Edge>::iterator>
void LinkPred::TestEdgeGen< Network, EdgeContT >::generateTP (
    OutputEdgeItT oit ) [inline]
```

Generate true positive links.

## Template Parameters

|                      |                       |
|----------------------|-----------------------|
| <i>OutputEdgeItT</i> | Iterator write edges. |
|----------------------|-----------------------|

## Parameters

|            |                       |
|------------|-----------------------|
| <i>oit</i> | Output edge iterator. |
|------------|-----------------------|

## 9.108.3.3 operator=() [1/2]

```
template<typename Network = UNetwork<>, typename EdgeContT = std::vector< typename Network↵
::Edge>>
TestEdgeGen& LinkPred::TestEdgeGen< Network, EdgeContT >::operator= (
    TestEdgeGen< Network, EdgeContT > && that ) [default]
```

Move assignment operator.

## Parameters

|             |                     |
|-------------|---------------------|
| <i>that</i> | The object to move. |
|-------------|---------------------|

## 9.108.3.4 operator=() [2/2]

```
template<typename Network = UNetwork<>, typename EdgeContT = std::vector< typename Network↵
::Edge>>
TestEdgeGen& LinkPred::TestEdgeGen< Network, EdgeContT >::operator= (
    TestEdgeGen< Network, EdgeContT > const & that ) [default]
```

Copy assignment operator.

## Parameters

|             |                     |
|-------------|---------------------|
| <i>that</i> | The object to copy. |
|-------------|---------------------|

**9.108.3.5 tnBegin()**

```
template<typename Network = UNetwork<>, typename EdgeContT = std::vector< typename Network↔
::Edge>>
auto LinkPred::TestEdgeGen< Network, EdgeContT >::tnBegin ( ) const [inline]
```

## Returns

Iterator to the first true positive link.

**9.108.3.6 tnEnd()**

```
template<typename Network = UNetwork<>, typename EdgeContT = std::vector< typename Network↔
::Edge>>
auto LinkPred::TestEdgeGen< Network, EdgeContT >::tnEnd ( ) const [inline]
```

## Returns

Iterator to one-past the last true positive link.

**9.108.3.7 tpBegin()**

```
template<typename Network = UNetwork<>, typename EdgeContT = std::vector< typename Network↔
::Edge>>
auto LinkPred::TestEdgeGen< Network, EdgeContT >::tpBegin ( ) const [inline]
```

## Returns

Iterator to the first true positive link.

## 9.108.3.8 tpEnd()

```
template<typename Network = UNetwork<>, typename EdgeContT = std::vector< typename Network↵
::Edge>>
auto LinkPred::TestEdgeGen< Network, EdgeContT >::tpEnd ( ) const [inline]
```

## Returns

Iterator to one-past the last true positive link.

The documentation for this class was generated from the following file:

- include/linkpred/perf/networkmanipulator.hpp

## 9.109 LinkPred::TestData< Network, EdgeContT >::TestEdgelt Class Reference

Test edges iterator.

```
#include <networkmanipulator.hpp>
```

Inheritance diagram for LinkPred::TestData< Network, EdgeContT >::TestEdgelt:

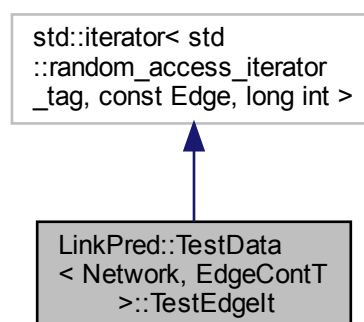

Collaboration diagram for LinkPred::TestData< Network, EdgeContT >::TestEdgelt:

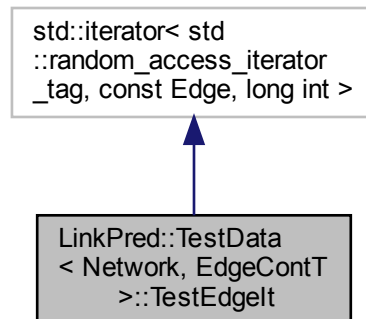

## Public Types

- using [pointer](#) = typename std::iterator< std::random\_access\_iterator\_tag, const [Edge](#), long int >::pointer
- using [reference](#) = typename std::iterator< std::random\_access\_iterator\_tag, const [Edge](#), long int >::reference
- using [difference\\_type](#) = typename std::iterator< std::random\_access\_iterator\_tag, const [Edge](#), long int >::difference\_type

## Public Member Functions

- [TestEdgelt](#) ([IteratorType](#) const &itType, typename EdgeContT::const\_iterator const &ecit, typename [TestEdgeGen](#)< Network, EdgeContT >::TPEdgelt const &tpeit, typename [TestEdgeGen](#)< Network, EdgeContT >::TNEdgelt const &neit)
- [TestEdgelt](#) ([TestEdgelt](#) const &that)=default
- [TestEdgelt](#) & operator= ([TestEdgelt](#) const &that)=default
- [TestEdgelt](#) ([TestEdgelt](#) &&that)=default
- [TestEdgelt](#) & operator= ([TestEdgelt](#) &&that)=default
- [reference](#) operator\* ()
- [pointer](#) operator-> ()
- [TestEdgelt](#) & operator++ ()
- [TestEdgelt](#) & operator-- ()
- [TestEdgelt](#) operator++ (int)
- [TestEdgelt](#) operator-- (int)
- [TestEdgelt](#) operator+ (const [difference\\_type](#) &n) const
- [TestEdgelt](#) & operator+= (const [difference\\_type](#) &n)
- [TestEdgelt](#) operator- (const [difference\\_type](#) &n) const
- [TestEdgelt](#) & operator-= (const [difference\\_type](#) &n)
- [difference\\_type](#) operator- (const [TestEdgelt](#) &that) const
- bool operator== (const [TestEdgelt](#) &that) const
- bool operator!= (const [TestEdgelt](#) &that) const
- bool operator< (const [TestEdgelt](#) &that) const
- bool operator> (const [TestEdgelt](#) &that) const
- bool operator<= (const [TestEdgelt](#) &that) const
- bool operator>= (const [TestEdgelt](#) &that) const



## Friends

- class [TestData](#)

### 9.109.1 Detailed Description

```
template<typename Network = UNetwork<>, typename EdgeContT = std::vector< typename Network::Edge>>
class LinkPred::TestData< Network, EdgeContT >::TestEdgeIt
```

Test edges iterator.

### 9.109.2 Member Typedef Documentation

#### 9.109.2.1 difference\_type

```
template<typename Network = UNetwork<>, typename EdgeContT = std::vector< typename Network::Edge>>
using LinkPred::TestData< Network, EdgeContT >::TestEdgeIt::difference_type = typename std::
::iterator<std::random_access_iterator_tag, const Edge, long int>::difference_type
```

The difference type associated with the iterator.

#### 9.109.2.2 pointer

```
template<typename Network = UNetwork<>, typename EdgeContT = std::vector< typename Network::Edge>>
using LinkPred::TestData< Network, EdgeContT >::TestEdgeIt::pointer = typename std::iterator<std::
::random_access_iterator_tag, const Edge, long int>::pointer
```

The pointer type associated with the iterator.

#### 9.109.2.3 reference

```
template<typename Network = UNetwork<>, typename EdgeContT = std::vector< typename Network::Edge>>
using LinkPred::TestData< Network, EdgeContT >::TestEdgeIt::reference = typename std::iterator<std::
::random_access_iterator_tag, const Edge, long int>::reference
```

The reference type associated with the iterator.

### 9.109.3 Constructor & Destructor Documentation

#### 9.109.3.1 TestEdgeIt() [1/3]

```
template<typename Network = UNetwork<>, typename EdgeContT = std::vector< typename Network::Edge>>
LinkPred::TestData< Network, EdgeContT >::TestEdgeIt::TestEdgeIt (
    IteratorType const & itType,
    typename EdgeContT::const_iterator const & eceit,
    typename TestEdgeGen< Network, EdgeContT >::TPEdgeIt const & tpeit,
    typename TestEdgeGen< Network, EdgeContT >::TNEdgeIt const & tneit ) [inline]
```

Constructor.

## Parameters

|               |                              |
|---------------|------------------------------|
| <i>itType</i> | The iterator type.           |
| <i>eceit</i>  | Edge container iterator.     |
| <i>tpeit</i>  | True positive edge iterator. |
| <i>tneit</i>  | True negative edge iterator. |

**9.109.3.2 TestEdgeIt()** [2/3]

```
template<typename Network = UNetwork<>, typename EdgeContT = std::vector< typename Network↵
::Edge>>
LinkPred::TestData< Network, EdgeContT >::TestEdgeIt::TestEdgeIt (
    TestEdgeIt const & that ) [default]
```

Copy constructor.

## Parameters

|             |                     |
|-------------|---------------------|
| <i>that</i> | The object to copy. |
|-------------|---------------------|

**9.109.3.3 TestEdgeIt()** [3/3]

```
template<typename Network = UNetwork<>, typename EdgeContT = std::vector< typename Network↵
::Edge>>
LinkPred::TestData< Network, EdgeContT >::TestEdgeIt::TestEdgeIt (
    TestEdgeIt && that ) [default]
```

Move constructor.

## Parameters

|             |                     |
|-------------|---------------------|
| <i>that</i> | The object to move. |
|-------------|---------------------|

**9.109.4 Member Function Documentation****9.109.4.1 operator"!="()**

```
template<typename Network = UNetwork<>, typename EdgeContT = std::vector< typename Network↵
::Edge>>
bool LinkPred::TestData< Network, EdgeContT >::TestEdgeIt::operator!= (
    const TestEdgeIt & that ) const [inline]
```

## Parameters

|             |                     |
|-------------|---------------------|
| <i>that</i> | The other iterator. |
|-------------|---------------------|

## Returns

True if this is not equal to that.

## 9.109.4.2 operator\*()

```
template<typename Network = UNetwork<>, typename EdgeContT = std::vector< typename Network↵
::Edge>>
reference LinkPred::TestData< Network, EdgeContT >::TestEdgeIt::operator* ( ) [inline]
```

Dereference operator.

## Returns

A reference to the object to which the iterator points.

## 9.109.4.3 operator+()

```
template<typename Network = UNetwork<>, typename EdgeContT = std::vector< typename Network↵
::Edge>>
TestEdgeIt LinkPred::TestData< Network, EdgeContT >::TestEdgeIt::operator+ (
    const difference_type & n ) const [inline]
```

Arithmetic + operator.

## Parameters

|          |                  |
|----------|------------------|
| <i>n</i> | Increment value. |
|----------|------------------|

## Returns

The new iterator.

## 9.109.4.4 operator++() [1/2]

```
template<typename Network = UNetwork<>, typename EdgeContT = std::vector< typename Network↵
::Edge>>
TestEdgeIt& LinkPred::TestData< Network, EdgeContT >::TestEdgeIt::operator++ ( ) [inline]
```

Pre-increment operator.

**Returns**

A reference to the new iterator.

**9.109.4.5 operator++()** [2/2]

```
template<typename Network = UNetwork<>, typename EdgeContT = std::vector< typename Network↔
::Edge>>
TestEdgeIt LinkPred::TestData< Network, EdgeContT >::TestEdgeIt::operator++ (
    int ) [inline]
```

Post-increment operator.

**Returns**

A reference to the new iterator.

**9.109.4.6 operator+=()**

```
template<typename Network = UNetwork<>, typename EdgeContT = std::vector< typename Network↔
::Edge>>
TestEdgeIt& LinkPred::TestData< Network, EdgeContT >::TestEdgeIt::operator+= (
    const difference_type & n ) [inline]
```

Arithmetic += operator.

**Parameters**

|          |                  |
|----------|------------------|
| <i>n</i> | Increment value. |
|----------|------------------|

**Returns**

A reference to the new iterator.

**9.109.4.7 operator-()** [1/2]

```
template<typename Network = UNetwork<>, typename EdgeContT = std::vector< typename Network↔
::Edge>>
TestEdgeIt LinkPred::TestData< Network, EdgeContT >::TestEdgeIt::operator- (
    const difference_type & n ) const [inline]
```

Arithmetic - operator.

## Parameters

|          |                  |
|----------|------------------|
| <i>n</i> | Decrement value. |
|----------|------------------|

## Returns

The new iterator.

**9.109.4.8 operator-() [2/2]**

```
template<typename Network = UNetwork<>, typename EdgeContT = std::vector< typename Network↔
::Edge>>
difference_type LinkPred::TestData< Network, EdgeContT >::TestEdgeIt::operator- (
    const TestEdgeIt & that ) const [inline]
```

Difference between the present iterator and the one passed as parameter.

## Parameters

|             |                     |
|-------------|---------------------|
| <i>that</i> | The other iterator. |
|-------------|---------------------|

## Returns

The difference between the current and that iterator.

**9.109.4.9 operator--() [1/2]**

```
template<typename Network = UNetwork<>, typename EdgeContT = std::vector< typename Network↔
::Edge>>
TestEdgeIt& LinkPred::TestData< Network, EdgeContT >::TestEdgeIt::operator-- ( ) [inline]
```

Pre-decrement operator.

## Returns

A reference to the new iterator.

**9.109.4.10 operator--() [2/2]**

```
template<typename Network = UNetwork<>, typename EdgeContT = std::vector< typename Network↔
::Edge>>
TestEdgeIt LinkPred::TestData< Network, EdgeContT >::TestEdgeIt::operator-- (
    int ) [inline]
```

Post-decrement operator.

## Returns

A reference to the new iterator.

**9.109.4.11 operator-=( )**

```
template<typename Network = UNetwork<>, typename EdgeContT = std::vector< typename Network↔
::Edge>>
TestEdgeIt& LinkPred::TestData< Network, EdgeContT >::TestEdgeIt::operator-= (
    const difference_type & n ) [inline]
```

Arithmetic -= operator.

**Parameters**

|          |                  |
|----------|------------------|
| <i>n</i> | Decrement value. |
|----------|------------------|

**Returns**

A reference to the new iterator.

**9.109.4.12 operator->( )**

```
template<typename Network = UNetwork<>, typename EdgeContT = std::vector< typename Network↔
::Edge>>
pointer LinkPred::TestData< Network, EdgeContT >::TestEdgeIt::operator-> ( ) [inline]
```

Arrow operator.

**Returns**

A pointer to the object to which the iterator points.

**9.109.4.13 operator<( )**

```
template<typename Network = UNetwork<>, typename EdgeContT = std::vector< typename Network↔
::Edge>>
bool LinkPred::TestData< Network, EdgeContT >::TestEdgeIt::operator< (
    const TestEdgeIt & that ) const [inline]
```

**Parameters**

|             |                     |
|-------------|---------------------|
| <i>that</i> | The other iterator. |
|-------------|---------------------|

**Returns**

True if this is less than that.

**9.109.4.14 operator<=()**

```
template<typename Network = UNetwork<>, typename EdgeContT = std::vector< typename Network↵
::Edge>>
bool LinkPred::TestData< Network, EdgeContT >::TestEdgeIt::operator<= (
    const TestEdgeIt & that ) const [inline]
```

**Parameters**

|             |                     |
|-------------|---------------------|
| <i>that</i> | The other iterator. |
|-------------|---------------------|

**Returns**

True if this is greater or equal to that.

**9.109.4.15 operator=() [1/2]**

```
template<typename Network = UNetwork<>, typename EdgeContT = std::vector< typename Network↵
::Edge>>
TestEdgeIt& LinkPred::TestData< Network, EdgeContT >::TestEdgeIt::operator= (
    TestEdgeIt && that ) [default]
```

Move assignment operator.

**Parameters**

|             |                     |
|-------------|---------------------|
| <i>that</i> | The object to move. |
|-------------|---------------------|

**9.109.4.16 operator=() [2/2]**

```
template<typename Network = UNetwork<>, typename EdgeContT = std::vector< typename Network↵
::Edge>>
TestEdgeIt& LinkPred::TestData< Network, EdgeContT >::TestEdgeIt::operator= (
    TestEdgeIt const & that ) [default]
```

Copy assignment operator.

**Parameters**

|             |                     |
|-------------|---------------------|
| <i>that</i> | The object to copy. |
|-------------|---------------------|

#### 9.109.4.17 operator==( )

```
template<typename Network = UNetwork<>, typename EdgeContT = std::vector< typename Network↵  
::Edge>>  
bool LinkPred::TestData< Network, EdgeContT >::TestEdgeIt::operator== (   
    const TestEdgeIt & that ) const [inline]
```

##### Parameters

|             |                     |
|-------------|---------------------|
| <i>that</i> | The other iterator. |
|-------------|---------------------|

##### Returns

True if this equals that.

#### 9.109.4.18 operator>( )

```
template<typename Network = UNetwork<>, typename EdgeContT = std::vector< typename Network↵  
::Edge>>  
bool LinkPred::TestData< Network, EdgeContT >::TestEdgeIt::operator> (   
    const TestEdgeIt & that ) const [inline]
```

##### Parameters

|             |                     |
|-------------|---------------------|
| <i>that</i> | The other iterator. |
|-------------|---------------------|

##### Returns

True if this is greater that.

#### 9.109.4.19 operator>=( )

```
template<typename Network = UNetwork<>, typename EdgeContT = std::vector< typename Network↵  
::Edge>>  
bool LinkPred::TestData< Network, EdgeContT >::TestEdgeIt::operator>= (   
    const TestEdgeIt & that ) const [inline]
```

##### Parameters

|             |                     |
|-------------|---------------------|
| <i>that</i> | The other iterator. |
|-------------|---------------------|

##### Returns

True if this is less or equal to that.



## 9.109.5 Friends And Related Function Documentation

### 9.109.5.1 TestData

```
template<typename Network = UNetwork<>, typename EdgeContT = std::vector< typename Network↵
::Edge>>
friend class TestData [friend]
```

[TestData](#) is a friend.

The documentation for this class was generated from the following file:

- include/linkpred/perf/[networkmanipulator.hpp](#)

## 9.110 LinkPred::TestEdgeGen< Network, EdgeContT >::TNEdgelt Class Reference

TN edges iterator.

```
#include <networkmanipulator.hpp>
```

Inheritance diagram for LinkPred::TestEdgeGen< Network, EdgeContT >::TNEdgelt:

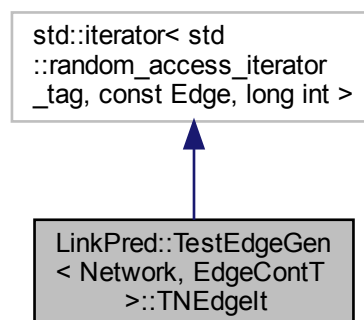

Collaboration diagram for LinkPred::TestEdgeGen< Network, EdgeContT >::TNEdgelt:

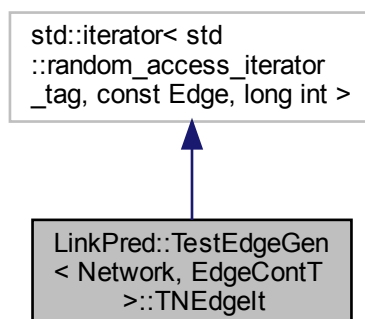

## Public Types

- using [pointer](#) = typename std::iterator< std::random\_access\_iterator\_tag, const Edge, long int >::pointer
- using [reference](#) = typename std::iterator< std::random\_access\_iterator\_tag, const Edge, long int >::reference
- using [difference\\_type](#) = typename std::iterator< std::random\_access\_iterator\_tag, const Edge, long int >::difference\_type

## Public Member Functions

- [TNEdgelt](#) ([TNEdgelt](#) const &that)=default
- [TNEdgelt](#) & [operator=](#) ([TNEdgelt](#) const &that)=default
- [TNEdgelt](#) ([TNEdgelt](#) &&that)=default
- [TNEdgelt](#) & [operator=](#) ([TNEdgelt](#) &&that)=default
- [reference](#) [operator\\*](#) ()
- [pointer](#) [operator->](#) ()
- [TNEdgelt](#) & [operator++](#) ()
- [TNEdgelt](#) & [operator--](#) ()
- [TNEdgelt](#) [operator++](#) (int)
- [TNEdgelt](#) [operator--](#) (int)
- [TNEdgelt](#) [operator+](#) (const [difference\\_type](#) &n) const
- [TNEdgelt](#) & [operator+=](#) (const [difference\\_type](#) &n)
- [TNEdgelt](#) [operator-](#) (const [difference\\_type](#) &n) const
- [TNEdgelt](#) & [operator-=](#) (const [difference\\_type](#) &n)
- [difference\\_type](#) [operator-](#) (const [TNEdgelt](#) &that) const
- bool [operator==](#) (const [TNEdgelt](#) &that) const
- bool [operator!=](#) (const [TNEdgelt](#) &that) const
- bool [operator<](#) (const [TNEdgelt](#) &that) const
- bool [operator>](#) (const [TNEdgelt](#) &that) const
- bool [operator<=](#) (const [TNEdgelt](#) &that) const
- bool [operator>=](#) (const [TNEdgelt](#) &that) const

## Friends

- class [TestEdgeGen](#)

### 9.110.1 Detailed Description

```
template<typename Network = UNetwork<>, typename EdgeContT = std::vector< typename Network::Edge>>
class LinkPred::TestEdgeGen< Network, EdgeContT >::TNEdget
```

TN edges iterator.

### 9.110.2 Member Typedef Documentation

#### 9.110.2.1 difference\_type

```
template<typename Network = UNetwork<>, typename EdgeContT = std::vector< typename Network::Edge>>
using LinkPred::TestEdgeGen< Network, EdgeContT >::TNEdget::difference_type = typename std::
::iterator<std::random_access_iterator_tag, const Edge, long int>::difference_type
```

The difference type associated with the iterator.

#### 9.110.2.2 pointer

```
template<typename Network = UNetwork<>, typename EdgeContT = std::vector< typename Network::Edge>>
using LinkPred::TestEdgeGen< Network, EdgeContT >::TNEdget::pointer = typename std::iterator<std::
::random_access_iterator_tag, const Edge, long int>::pointer
```

The pointer type associated with the iterator.

#### 9.110.2.3 reference

```
template<typename Network = UNetwork<>, typename EdgeContT = std::vector< typename Network::Edge>>
using LinkPred::TestEdgeGen< Network, EdgeContT >::TNEdget::reference = typename std::iterator<std::
::random_access_iterator_tag, const Edge, long int>::reference
```

The reference type associated with the iterator.

### 9.110.3 Constructor & Destructor Documentation

#### 9.110.3.1 TNEdget() [1/2]

```
template<typename Network = UNetwork<>, typename EdgeContT = std::vector< typename Network::Edge>>
LinkPred::TestEdgeGen< Network, EdgeContT >::TNEdget::TNEdget (
    TNEdget const & that ) [default]
```

Copy constructor.

## Parameters

|             |                     |
|-------------|---------------------|
| <i>that</i> | The object to copy. |
|-------------|---------------------|

**9.110.3.2 TNEdget() [2/2]**

```
template<typename Network = UNetwork<>, typename EdgeContT = std::vector< typename Network↔
::Edge>>
LinkPred::TestEdgeGen< Network, EdgeContT >::TNEdget::TNEdget (
    TNEdget && that ) [default]
```

Move constructor.

## Parameters

|             |                     |
|-------------|---------------------|
| <i>that</i> | The object to move. |
|-------------|---------------------|

**9.110.4 Member Function Documentation****9.110.4.1 operator"!=()"**

```
template<typename Network = UNetwork<>, typename EdgeContT = std::vector< typename Network↔
::Edge>>
bool LinkPred::TestEdgeGen< Network, EdgeContT >::TNEdget::operator!= (
    const TNEdget & that ) const [inline]
```

## Parameters

|             |                     |
|-------------|---------------------|
| <i>that</i> | The other iterator. |
|-------------|---------------------|

## Returns

True if this is not equal to that.

**9.110.4.2 operator\*()"**

```
template<typename Network = UNetwork<>, typename EdgeContT = std::vector< typename Network↔
::Edge>>
reference LinkPred::TestEdgeGen< Network, EdgeContT >::TNEdget::operator* ( ) [inline]
```

Dereference operator.

**Returns**

A reference to the object to which the iterator points.

**9.110.4.3 operator+()**

```
template<typename Network = UNetwork<>, typename EdgeContT = std::vector< typename Network↵
::Edge>>
TNEdgeIt LinkPred::TestEdgeGen< Network, EdgeContT >::TNEdgeIt::operator+ (
    const difference_type & n ) const [inline]
```

Arithmetic + operator.

**Parameters**

|          |                  |
|----------|------------------|
| <i>n</i> | Increment value. |
|----------|------------------|

**Returns**

The new iterator.

**9.110.4.4 operator++() [1/2]**

```
template<typename Network = UNetwork<>, typename EdgeContT = std::vector< typename Network↵
::Edge>>
TNEdgeIt& LinkPred::TestEdgeGen< Network, EdgeContT >::TNEdgeIt::operator++ ( ) [inline]
```

Pre-increment operator.

**Returns**

A reference to the new iterator.

**9.110.4.5 operator++() [2/2]**

```
template<typename Network = UNetwork<>, typename EdgeContT = std::vector< typename Network↵
::Edge>>
TNEdgeIt LinkPred::TestEdgeGen< Network, EdgeContT >::TNEdgeIt::operator++ (
    int ) [inline]
```

Post-increment operator.

**Returns**

A reference to the new iterator.

#### 9.110.4.6 operator+=()

```
template<typename Network = UNetwork<>, typename EdgeContT = std::vector< typename Network↵
::Edge>>
TNEdgeIt& LinkPred::TestEdgeGen< Network, EdgeContT >::TNEdgeIt::operator+= (
    const difference_type & n ) [inline]
```

Arithmetic += operator.

##### Parameters

|          |                  |
|----------|------------------|
| <i>n</i> | Increment value. |
|----------|------------------|

##### Returns

A reference to the new iterator.

#### 9.110.4.7 operator-() [1/2]

```
template<typename Network = UNetwork<>, typename EdgeContT = std::vector< typename Network↵
::Edge>>
TNEdgeIt LinkPred::TestEdgeGen< Network, EdgeContT >::TNEdgeIt::operator- (
    const difference_type & n ) const [inline]
```

Arithmetic - operator.

##### Parameters

|          |                  |
|----------|------------------|
| <i>n</i> | Decrement value. |
|----------|------------------|

##### Returns

The new iterator.

#### 9.110.4.8 operator-() [2/2]

```
template<typename Network = UNetwork<>, typename EdgeContT = std::vector< typename Network↵
::Edge>>
difference_type LinkPred::TestEdgeGen< Network, EdgeContT >::TNEdgeIt::operator- (
    const TNEdgeIt & that ) const [inline]
```

Difference between the present iterator and the one passed as parameter.

##### Parameters

|             |                     |
|-------------|---------------------|
| <i>that</i> | The other iterator. |
|-------------|---------------------|

**Returns**

The difference between the current and that iterator.

**9.110.4.9 operator--() [1/2]**

```
template<typename Network = UNetwork<>, typename EdgeContT = std::vector< typename Network↵
::Edge>>
TNEdgeIt& LinkPred::TestEdgeGen< Network, EdgeContT >::TNEdgeIt::operator-- ( ) [inline]
```

Pre-decrement operator.

**Returns**

A reference to the new iterator.

**9.110.4.10 operator--() [2/2]**

```
template<typename Network = UNetwork<>, typename EdgeContT = std::vector< typename Network↵
::Edge>>
TNEdgeIt LinkPred::TestEdgeGen< Network, EdgeContT >::TNEdgeIt::operator-- (
    int ) [inline]
```

Post-decrement operator.

**Returns**

A reference to the new iterator.

**9.110.4.11 operator-=()**

```
template<typename Network = UNetwork<>, typename EdgeContT = std::vector< typename Network↵
::Edge>>
TNEdgeIt& LinkPred::TestEdgeGen< Network, EdgeContT >::TNEdgeIt::operator-= (
    const difference_type & n ) [inline]
```

Arithmetic -= operator.

**Parameters**

|          |                  |
|----------|------------------|
| <i>n</i> | Decrement value. |
|----------|------------------|

**Returns**

A reference to the new iterator.

**9.110.4.12 operator->()**

```
template<typename Network = UNetwork<>, typename EdgeContT = std::vector< typename Network↔
::Edge>>
pointer LinkPred::TestEdgeGen< Network, EdgeContT >::TNEdgeIt::operator-> ( ) [inline]
```

Arrow operator.

**Returns**

A pointer to the object to which the iterator points.

**9.110.4.13 operator<()**

```
template<typename Network = UNetwork<>, typename EdgeContT = std::vector< typename Network↔
::Edge>>
bool LinkPred::TestEdgeGen< Network, EdgeContT >::TNEdgeIt::operator< (
    const TNEdgeIt & that ) const [inline]
```

**Parameters**

|             |                     |
|-------------|---------------------|
| <i>that</i> | The other iterator. |
|-------------|---------------------|

**Returns**

True if this is less than that.

**9.110.4.14 operator<=()**

```
template<typename Network = UNetwork<>, typename EdgeContT = std::vector< typename Network↔
::Edge>>
bool LinkPred::TestEdgeGen< Network, EdgeContT >::TNEdgeIt::operator<= (
    const TNEdgeIt & that ) const [inline]
```

**Parameters**

|             |                     |
|-------------|---------------------|
| <i>that</i> | The other iterator. |
|-------------|---------------------|



**Returns**

True if this is greater or equal to that.

**9.110.4.15 operator=() [1/2]**

```
template<typename Network = UNetwork<>, typename EdgeContT = std::vector< typename Network↵
::Edge>>
TNEdgeIt& LinkPred::TestEdgeGen< Network, EdgeContT >::TNEdgeIt::operator= (
    TNEdgeIt && that ) [default]
```

Move assignment operator.

**Parameters**

|             |                     |
|-------------|---------------------|
| <i>that</i> | The object to move. |
|-------------|---------------------|

**9.110.4.16 operator=() [2/2]**

```
template<typename Network = UNetwork<>, typename EdgeContT = std::vector< typename Network↵
::Edge>>
TNEdgeIt& LinkPred::TestEdgeGen< Network, EdgeContT >::TNEdgeIt::operator= (
    TNEdgeIt const & that ) [default]
```

Copy assignment operator.

**Parameters**

|             |                     |
|-------------|---------------------|
| <i>that</i> | The object to copy. |
|-------------|---------------------|

**9.110.4.17 operator==( )**

```
template<typename Network = UNetwork<>, typename EdgeContT = std::vector< typename Network↵
::Edge>>
bool LinkPred::TestEdgeGen< Network, EdgeContT >::TNEdgeIt::operator== (
    const TNEdgeIt & that ) const [inline]
```

**Parameters**

|             |                     |
|-------------|---------------------|
| <i>that</i> | The other iterator. |
|-------------|---------------------|

**Returns**

True if this equals that.

**9.110.4.18 operator>()**

```
template<typename Network = UNetwork<>, typename EdgeContT = std::vector< typename Network↵
::Edge>>
bool LinkPred::TestEdgeGen< Network, EdgeContT >::TNEdgeIt::operator> (
    const TNEdgeIt & that ) const [inline]
```

**Parameters**

|             |                     |
|-------------|---------------------|
| <i>that</i> | The other iterator. |
|-------------|---------------------|

**Returns**

True if this is greater that.

**9.110.4.19 operator>=()**

```
template<typename Network = UNetwork<>, typename EdgeContT = std::vector< typename Network↵
::Edge>>
bool LinkPred::TestEdgeGen< Network, EdgeContT >::TNEdgeIt::operator>= (
    const TNEdgeIt & that ) const [inline]
```

**Parameters**

|             |                     |
|-------------|---------------------|
| <i>that</i> | The other iterator. |
|-------------|---------------------|

**Returns**

True if this is less or equal to that.

**9.110.5 Friends And Related Function Documentation****9.110.5.1 TestEdgeGen**

```
template<typename Network = UNetwork<>, typename EdgeContT = std::vector< typename Network↵
::Edge>>
friend class TestEdgeGen [friend]
```

[TestEdgeGen](#) is a friend.

The documentation for this class was generated from the following file:

- include/linkpred/perf/[networkmanipulator.hpp](#)

## 9.111 LinkPred::TestEdgeGen< Network, EdgeContT >::TPEdgelt Class Reference

TP edges iterator.

```
#include <networkmanipulator.hpp>
```

Inheritance diagram for LinkPred::TestEdgeGen< Network, EdgeContT >::TPEdgelt:

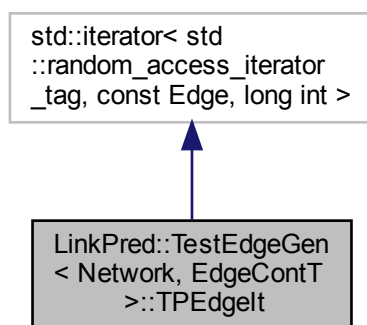

Collaboration diagram for LinkPred::TestEdgeGen< Network, EdgeContT >::TPEdgelt:

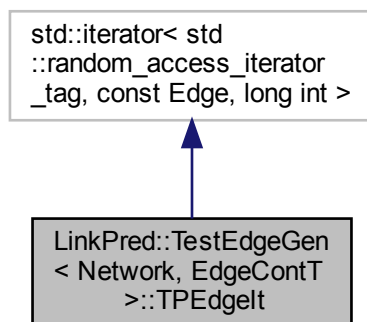

### Public Types

- using [pointer](#) = typename std::iterator< std::random\_access\_iterator\_tag, const Edge, long int >::pointer
- using [reference](#) = typename std::iterator< std::random\_access\_iterator\_tag, const Edge, long int >::reference
- using [difference\\_type](#) = typename std::iterator< std::random\_access\_iterator\_tag, const Edge, long int >::difference\_type

## Public Member Functions

- [TPEdgelt](#) ([TPEdgelt](#) const &that)=default
- [TPEdgelt](#) & [operator=](#) ([TPEdgelt](#) const &that)=default
- [TPEdgelt](#) ([TPEdgelt](#) &&that)=default
- [TPEdgelt](#) & [operator=](#) ([TPEdgelt](#) &&that)=default
- [reference operator\\*](#) ()
- [pointer operator->](#) ()
- [TPEdgelt](#) & [operator++](#) ()
- [TPEdgelt](#) & [operator--](#) ()
- [TPEdgelt](#) [operator++](#) (int)
- [TPEdgelt](#) [operator--](#) (int)
- [TPEdgelt](#) [operator+](#) (const [difference\\_type](#) &n) const
- [TPEdgelt](#) & [operator+=](#) (const [difference\\_type](#) &n)
- [TPEdgelt](#) [operator-](#) (const [difference\\_type](#) &n) const
- [TPEdgelt](#) & [operator-=](#) (const [difference\\_type](#) &n)
- [difference\\_type](#) [operator-](#) (const [TPEdgelt](#) &that) const
- bool [operator==](#) (const [TPEdgelt](#) &that) const
- bool [operator!=](#) (const [TPEdgelt](#) &that) const
- bool [operator<](#) (const [TPEdgelt](#) &that) const
- bool [operator>](#) (const [TPEdgelt](#) &that) const
- bool [operator<=](#) (const [TPEdgelt](#) &that) const
- bool [operator>=](#) (const [TPEdgelt](#) &that) const

## Friends

- class [TestEdgeGen](#)

### 9.111.1 Detailed Description

```
template<typename Network = UNetwork<>, typename EdgeContT = std::vector< typename Network::Edge>>
class LinkPred::TestEdgeGen< Network, EdgeContT >::TPEdgelt
```

TP edges iterator.

### 9.111.2 Member Typedef Documentation

#### 9.111.2.1 [difference\\_type](#)

```
template<typename Network = UNetwork<>, typename EdgeContT = std::vector< typename Network::Edge>>
::Edge>>
using LinkPred::TestEdgeGen< Network, EdgeContT >::TPEdgeIt::difference_type = typename std::
::iterator<std::random_access_iterator_tag, const Edge, long int>::difference_type
```

The difference type associated with the iterator.

### 9.111.2.2 pointer

```
template<typename Network = UNetwork<>, typename EdgeContT = std::vector< typename Network↵
::Edge>>
using LinkPred::TestEdgeGen< Network, EdgeContT >::TPEdgeIt::pointer = typename std::iterator<std↵
::random_access_iterator_tag, const Edge, long int>::pointer
```

The pointer type associated with the iterator.

### 9.111.2.3 reference

```
template<typename Network = UNetwork<>, typename EdgeContT = std::vector< typename Network↵
::Edge>>
using LinkPred::TestEdgeGen< Network, EdgeContT >::TPEdgeIt::reference = typename std::iterator<std↵
::random_access_iterator_tag, const Edge, long int>::reference
```

The reference type associated with the iterator.

## 9.111.3 Constructor & Destructor Documentation

### 9.111.3.1 TPEdgeIt() [1/2]

```
template<typename Network = UNetwork<>, typename EdgeContT = std::vector< typename Network↵
::Edge>>
LinkPred::TestEdgeGen< Network, EdgeContT >::TPEdgeIt::TPEdgeIt (
    TPEdgeIt const & that ) [default]
```

Copy constructor.

#### Parameters

|             |                     |
|-------------|---------------------|
| <i>that</i> | The object to copy. |
|-------------|---------------------|

### 9.111.3.2 TPEdgeIt() [2/2]

```
template<typename Network = UNetwork<>, typename EdgeContT = std::vector< typename Network↵
::Edge>>
LinkPred::TestEdgeGen< Network, EdgeContT >::TPEdgeIt::TPEdgeIt (
    TPEdgeIt && that ) [default]
```

Move constructor.

#### Parameters

|             |                     |
|-------------|---------------------|
| <i>that</i> | The object to move. |
|-------------|---------------------|

## 9.111.4 Member Function Documentation

### 9.111.4.1 operator"!="()

```
template<typename Network = UNetwork<>, typename EdgeContT = std::vector< typename Network↵
::Edge>>
bool LinkPred::TestEdgeGen< Network, EdgeContT >::TPEdgeIt::operator!= (
    const TPEdgeIt & that ) const [inline]
```

#### Parameters

|             |                     |
|-------------|---------------------|
| <i>that</i> | The other iterator. |
|-------------|---------------------|

#### Returns

True if this is not equal to that.

### 9.111.4.2 operator\*()

```
template<typename Network = UNetwork<>, typename EdgeContT = std::vector< typename Network↵
::Edge>>
reference LinkPred::TestEdgeGen< Network, EdgeContT >::TPEdgeIt::operator* ( ) [inline]
```

Dereference operator.

#### Returns

A reference to the object to which the iterator points.

### 9.111.4.3 operator+()

```
template<typename Network = UNetwork<>, typename EdgeContT = std::vector< typename Network↵
::Edge>>
TPEdgeIt LinkPred::TestEdgeGen< Network, EdgeContT >::TPEdgeIt::operator+ (
    const difference_type & n ) const [inline]
```

Arithmetic + operator.

#### Parameters

|          |                  |
|----------|------------------|
| <i>n</i> | Increment value. |
|----------|------------------|

**Returns**

The new iterator.

**9.111.4.4 operator++() [1/2]**

```
template<typename Network = UNetwork<>, typename EdgeContT = std::vector< typename Network↔
::Edge>>
TPEdgeIt& LinkPred::TestEdgeGen< Network, EdgeContT >::TPEdgeIt::operator++ ( ) [inline]
```

Pre-increment operator.

**Returns**

A reference to the new iterator.

**9.111.4.5 operator++() [2/2]**

```
template<typename Network = UNetwork<>, typename EdgeContT = std::vector< typename Network↔
::Edge>>
TPEdgeIt LinkPred::TestEdgeGen< Network, EdgeContT >::TPEdgeIt::operator++ (
    int ) [inline]
```

Post-increment operator.

**Returns**

A reference to the new iterator.

**9.111.4.6 operator+=( )**

```
template<typename Network = UNetwork<>, typename EdgeContT = std::vector< typename Network↔
::Edge>>
TPEdgeIt& LinkPred::TestEdgeGen< Network, EdgeContT >::TPEdgeIt::operator+= (
    const difference_type & n ) [inline]
```

Arithmetic += operator.

**Parameters**

|          |                  |
|----------|------------------|
| <i>n</i> | Increment value. |
|----------|------------------|

**Returns**

A reference to the new iterator.

**9.111.4.7 operator-() [1/2]**

```
template<typename Network = UNetwork<>, typename EdgeContT = std::vector< typename Network↵
::Edge>>
TPEdgeIt LinkPred::TestEdgeGen< Network, EdgeContT >::TPEdgeIt::operator- (
    const difference_type & n ) const [inline]
```

Arithmetic - operator.

**Parameters**

|          |                  |
|----------|------------------|
| <i>n</i> | Decrement value. |
|----------|------------------|

**Returns**

The new iterator.

**9.111.4.8 operator-() [2/2]**

```
template<typename Network = UNetwork<>, typename EdgeContT = std::vector< typename Network↵
::Edge>>
difference_type LinkPred::TestEdgeGen< Network, EdgeContT >::TPEdgeIt::operator- (
    const TPEdgeIt & that ) const [inline]
```

Difference between the present iterator and the one passed as parameter.

**Parameters**

|             |                     |
|-------------|---------------------|
| <i>that</i> | The other iterator. |
|-------------|---------------------|

**Returns**

The difference between the current and that iterator.

**9.111.4.9 operator--() [1/2]**

```
template<typename Network = UNetwork<>, typename EdgeContT = std::vector< typename Network↵
::Edge>>
TPEdgeIt& LinkPred::TestEdgeGen< Network, EdgeContT >::TPEdgeIt::operator-- ( ) [inline]
```

Pre-decrement operator.



**Returns**

A reference to the new iterator.

**9.111.4.10 operator--() [2/2]**

```
template<typename Network = UNetwork<>, typename EdgeContT = std::vector< typename Network↔
::Edge>>
TPEdgeIt LinkPred::TestEdgeGen< Network, EdgeContT >::TPEdgeIt::operator-- (
    int ) [inline]
```

Post-decrement operator.

**Returns**

A reference to the new iterator.

**9.111.4.11 operator-=()**

```
template<typename Network = UNetwork<>, typename EdgeContT = std::vector< typename Network↔
::Edge>>
TPEdgeIt& LinkPred::TestEdgeGen< Network, EdgeContT >::TPEdgeIt::operator-= (
    const difference_type & n ) [inline]
```

Arithmetic -= operator.

**Parameters**

|          |                  |
|----------|------------------|
| <i>n</i> | Decrement value. |
|----------|------------------|

**Returns**

A reference to the new iterator.

**9.111.4.12 operator->()**

```
template<typename Network = UNetwork<>, typename EdgeContT = std::vector< typename Network↔
::Edge>>
pointer LinkPred::TestEdgeGen< Network, EdgeContT >::TPEdgeIt::operator-> ( ) [inline]
```

Arrow operator.

**Returns**

A pointer to the object to which the iterator points.

**9.111.4.13 operator<()**

```
template<typename Network = UNetwork<>, typename EdgeContT = std::vector< typename Network↵
::Edge>>
bool LinkPred::TestEdgeGen< Network, EdgeContT >::TPEdgeIt::operator< (
    const TPEdgeIt & that ) const [inline]
```

**Parameters**

|             |                     |
|-------------|---------------------|
| <i>that</i> | The other iterator. |
|-------------|---------------------|

**Returns**

True if this is less than that.

**9.111.4.14 operator<=()**

```
template<typename Network = UNetwork<>, typename EdgeContT = std::vector< typename Network↵
::Edge>>
bool LinkPred::TestEdgeGen< Network, EdgeContT >::TPEdgeIt::operator<= (
    const TPEdgeIt & that ) const [inline]
```

**Parameters**

|             |                     |
|-------------|---------------------|
| <i>that</i> | The other iterator. |
|-------------|---------------------|

**Returns**

True if this is greater or equal to that.

**9.111.4.15 operator=() [1/2]**

```
template<typename Network = UNetwork<>, typename EdgeContT = std::vector< typename Network↵
::Edge>>
TPEdgeIt& LinkPred::TestEdgeGen< Network, EdgeContT >::TPEdgeIt::operator= (
    TPEdgeIt && that ) [default]
```

Move assignment operator.

**Parameters**

|             |                     |
|-------------|---------------------|
| <i>that</i> | The object to move. |
|-------------|---------------------|

#### 9.111.4.16 operator=() [2/2]

```
template<typename Network = UNetwork<>, typename EdgeContT = std::vector< typename Network↵
::Edge>>
TPEdgeIt& LinkPred::TestEdgeGen< Network, EdgeContT >::TPEdgeIt::operator= (
    TPEdgeIt const & that ) [default]
```

Copy assignment operator.

##### Parameters

|             |                     |
|-------------|---------------------|
| <i>that</i> | The object to copy. |
|-------------|---------------------|

#### 9.111.4.17 operator==( )

```
template<typename Network = UNetwork<>, typename EdgeContT = std::vector< typename Network↵
::Edge>>
bool LinkPred::TestEdgeGen< Network, EdgeContT >::TPEdgeIt::operator== (
    const TPEdgeIt & that ) const [inline]
```

##### Parameters

|             |                     |
|-------------|---------------------|
| <i>that</i> | The other iterator. |
|-------------|---------------------|

##### Returns

True if this equals that.

#### 9.111.4.18 operator>()

```
template<typename Network = UNetwork<>, typename EdgeContT = std::vector< typename Network↵
::Edge>>
bool LinkPred::TestEdgeGen< Network, EdgeContT >::TPEdgeIt::operator> (
    const TPEdgeIt & that ) const [inline]
```

##### Parameters

|             |                     |
|-------------|---------------------|
| <i>that</i> | The other iterator. |
|-------------|---------------------|

##### Returns

True if this is greater than that.

#### 9.111.4.19 operator>=()

```
template<typename Network = UNetwork<>, typename EdgeContT = std::vector< typename Network↵
::Edge>>
bool LinkPred::TestEdgeGen< Network, EdgeContT >::TPEdgeIt::operator>= (
    const TPEdgeIt & that ) const [inline]
```

##### Parameters

|             |                     |
|-------------|---------------------|
| <i>that</i> | The other iterator. |
|-------------|---------------------|

##### Returns

True if this is less or equal to that.

### 9.111.5 Friends And Related Function Documentation

#### 9.111.5.1 TestEdgeGen

```
template<typename Network = UNetwork<>, typename EdgeContT = std::vector< typename Network↵
::Edge>>
friend class TestEdgeGen [friend]
```

[TestEdgeGen](#) is a friend.

The documentation for this class was generated from the following file:

- include/linkpred/perf/[networkmanipulator.hpp](#)

## 9.112 LinkPred::TPR< PredResultsT > Class Template Reference

Compute top precision.

```
#include <perfmeasure.hpp>
```

Inheritance diagram for LinkPred::TPR< PredResultsT >:

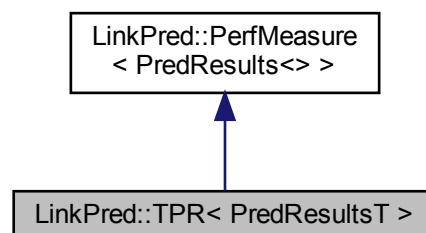

Collaboration diagram for LinkPred::TPR< PredResultsT >:

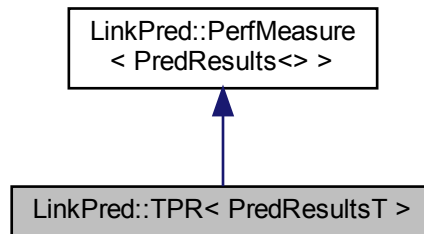

## Public Types

- using [ScoresItT](#) = typename [PerfMeasure](#)< PredResultsT >::[ScoresItT](#)

## Public Member Functions

- [TPR](#) (std::size\_t l)
- [TPR](#) (std::size\_t l, std::string name)
- [TPR](#) ([TPR](#) const &that)=default
- [TPR](#) & [operator=](#) ([TPR](#) const &that)=default
- [TPR](#) ([TPR](#) &&that)=default
- [TPR](#) & [operator=](#) ([TPR](#) &&that)=default
- virtual void [evalUsingTop](#) (std::shared\_ptr< PredResultsT > &predResults, [PerfResults](#) &results)
- virtual void [evalUsingPredict](#) (std::shared\_ptr< PredResultsT > &predResults, [PerfResults](#) &results)
- virtual void [eval](#) (std::shared\_ptr< PredResultsT > &predResults, [PerfResults](#) &results)
- virtual void [eval](#) ([ScoresItT](#) posScoresBegin, [ScoresItT](#) posScoresEnd, [ScoresItT](#) negScoresBegin, [ScoresItT](#) negScoresEnd, [SortOrder](#) &posSortOrder, [SortOrder](#) &negSortOrder, [PerfResults](#) &results)
- bool [isUseTopMethod](#) () const
- void [setUseTopMethod](#) (bool useTopMethod)
- virtual bool [requiresNeg](#) () const
- virtual bool [requiresShuffling](#) () const
- virtual [~TPR](#) ()=default

## Static Public Member Functions

- template<typename ScoresItT >  
static double [getTPR](#) ([ScoresItT](#) posScoresBegin, [ScoresItT](#) posScoresEnd, [ScoresItT](#) negScoresBegin, [ScoresItT](#) negScoresEnd, std::size\_t l)

### 9.112.1 Detailed Description

```
template<typename PredResultsT = PredResults<>>
class LinkPred::TPR< PredResultsT >
```

Compute top precision.

## Template Parameters

|                     |                              |
|---------------------|------------------------------|
| <i>PredResultsT</i> | The prediction results type. |
|---------------------|------------------------------|

## 9.112.2 Member Typedef Documentation

### 9.112.2.1 ScoresItT

```
template<typename PredResultsT = PredResults<>>
using LinkPred::TPR< PredResultsT >::ScoresItT = typename PerfMeasure<PredResultsT>::ScoresItT
```

Scores iterator type.

## 9.112.3 Constructor & Destructor Documentation

### 9.112.3.1 TPR() [1/4]

```
template<typename PredResultsT = PredResults<>>
LinkPred::TPR< PredResultsT >::TPR (
    std::size_t l ) [inline]
```

Constructor.

## Parameters

|          |                                  |
|----------|----------------------------------|
| <i>l</i> | The number of links to consider. |
|----------|----------------------------------|

### 9.112.3.2 TPR() [2/4]

```
template<typename PredResultsT = PredResults<>>
LinkPred::TPR< PredResultsT >::TPR (
    std::size_t l,
    std::string name ) [inline]
```

Constructor.

## Parameters

|             |                                      |
|-------------|--------------------------------------|
| <i>l</i>    | The number of links to consider.     |
| <i>name</i> | The name of the performance measure. |

### 9.112.3.3 TPR() [3/4]

```
template<typename PredResultsT = PredResults<>>
LinkPred::TPR< PredResultsT >::TPR (
    TPR< PredResultsT > const & that ) [default]
```

Copy constructor.

#### Parameters

|             |                     |
|-------------|---------------------|
| <i>that</i> | The object to copy. |
|-------------|---------------------|

### 9.112.3.4 TPR() [4/4]

```
template<typename PredResultsT = PredResults<>>
LinkPred::TPR< PredResultsT >::TPR (
    TPR< PredResultsT > && that ) [default]
```

Move constructor.

#### Parameters

|             |                     |
|-------------|---------------------|
| <i>that</i> | The object to move. |
|-------------|---------------------|

### 9.112.3.5 ~TPR()

```
template<typename PredResultsT = PredResults<>>
virtual LinkPred::TPR< PredResultsT >::~~TPR ( ) [virtual], [default]
```

Destructor.

## 9.112.4 Member Function Documentation

**9.112.4.1 eval()** [1/2]

```
template<typename PredResultsT = PredResults<>>
virtual void LinkPred::TPR< PredResultsT >::eval (
    ScoresItT posScoresBegin,
    ScoresItT posScoresEnd,
    ScoresItT negScoresBegin,
    ScoresItT negScoresEnd,
    SortOrder & posSortOrder,
    SortOrder & negSortOrder,
    PerfResults & results ) [inline], [virtual]
```

Computes the area under the **PR** curve.

**Parameters**

|                       |                                                                           |
|-----------------------|---------------------------------------------------------------------------|
| <i>posScoresBegin</i> | Iterator to the first positive score.                                     |
| <i>posScoresEnd</i>   | Iterator to one-past-the-last positive score.                             |
| <i>negScoresBegin</i> | Iterator to the first negative score.                                     |
| <i>negScoresEnd</i>   | Iterator to one-past-the-last negative score.                             |
| <i>posSortOrder</i>   | The sorting order of positive scores. This may be modified by the method. |
| <i>negSortOrder</i>   | The sorting order of negative scores. This may be modified by the method. |
| <i>results</i>        | To write results.                                                         |

**9.112.4.2 eval()** [2/2]

```
template<typename PredResultsT = PredResults<>>
virtual void LinkPred::TPR< PredResultsT >::eval (
    std::shared_ptr< PredResultsT > & predResults,
    PerfResults & results ) [inline], [virtual]
```

Computes the performance measure.

**Parameters**

|                    |                            |
|--------------------|----------------------------|
| <i>predResults</i> | The prediction results.    |
| <i>results</i>     | Iterator to write results. |

**9.112.4.3 evalUsingPredict()**

```
template<typename PredResultsT = PredResults<>>
virtual void LinkPred::TPR< PredResultsT >::evalUsingPredict (
    std::shared_ptr< PredResultsT > & predResults,
    PerfResults & results ) [inline], [virtual]
```

Computes the **TPR** using the predict method.



## Parameters

|                    |                            |
|--------------------|----------------------------|
| <i>predResults</i> | The prediction results.    |
| <i>results</i>     | Iterator to write results. |

## 9.112.4.4 evalUsingTop()

```
template<typename PredResultsT = PredResults<>>
virtual void LinkPred::TPR< PredResultsT >::evalUsingTop (
    std::shared_ptr< PredResultsT > & predResults,
    PerfResults & results ) [inline], [virtual]
```

Computes the [TPR](#) using the top method.

## Parameters

|                    |                            |
|--------------------|----------------------------|
| <i>predResults</i> | The prediction results.    |
| <i>results</i>     | Iterator to write results. |

## 9.112.4.5 getTPR()

```
template<typename PredResultsT = PredResults<>>
template<typename ScoresItT >
static double LinkPred::TPR< PredResultsT >::getTPR (
    ScoresItT posScoresBegin,
    ScoresItT posScoresEnd,
    ScoresItT negScoresBegin,
    ScoresItT negScoresEnd,
    std::size_t l ) [inline], [static]
```

Ranges must be sorted in decreasing order.

## Parameters

|                       |                                               |
|-----------------------|-----------------------------------------------|
| <i>posScoresBegin</i> | Iterator to the first positive score.         |
| <i>posScoresEnd</i>   | Iterator to one-past-the-last positive score. |
| <i>negScoresBegin</i> | Iterator to the first negative score.         |
| <i>negScoresEnd</i>   | Iterator to one-past-the-last negative score. |
| <i>l</i>              | The number of links to consider.              |

## 9.112.4.6 isUseTopMethod()

```
template<typename PredResultsT = PredResults<>>
```

```
bool LinkPred::TPR< PredResultsT >::isUseTopMethod ( ) const [inline]
```

#### Returns

True if the method top is used to compute [TPR](#), false otherwise.

#### 9.112.4.7 operator=() [1/2]

```
template<typename PredResultsT = PredResults<>>
TPR& LinkPred::TPR< PredResultsT >::operator= (
    TPR< PredResultsT > && that ) [default]
```

Move assignment operator.

#### Parameters

|             |                     |
|-------------|---------------------|
| <i>that</i> | The object to move. |
|-------------|---------------------|

#### 9.112.4.8 operator=() [2/2]

```
template<typename PredResultsT = PredResults<>>
TPR& LinkPred::TPR< PredResultsT >::operator= (
    TPR< PredResultsT > const & that ) [default]
```

Copy assignment operator.

#### Parameters

|             |                     |
|-------------|---------------------|
| <i>that</i> | The object to copy. |
|-------------|---------------------|

#### 9.112.4.9 requiresNeg()

```
template<typename PredResultsT = PredResults<>>
virtual bool LinkPred::TPR< PredResultsT >::requiresNeg ( ) const [inline], [virtual]
```

#### Returns

Whether the performance measure requires the generation of negative set. The default value is true.

**9.112.4.10 requiresShuffling()**

```
template<typename PredResultsT = PredResults<>>
virtual bool LinkPred::TPR< PredResultsT >::requiresShuffling ( ) const [inline], [virtual]
```

**Returns**

Whether the performance measure requires network shuffling.

**9.112.4.11 setUseTopMethod()**

```
template<typename PredResultsT = PredResults<>>
void LinkPred::TPR< PredResultsT >::setUseTopMethod (
    bool useTopMethod ) [inline]
```

Enable/disable the use of the method top is used to compute [TPR](#).

**Parameters**

|                     |                                                                  |
|---------------------|------------------------------------------------------------------|
| <i>useTopMethod</i> | If true, enable the use of the method top, otherwise disable it. |
|---------------------|------------------------------------------------------------------|

The documentation for this class was generated from the following file:

- [include/linkpred/perf/perfmeasure.hpp](#)

## 9.113 LinkPred::UADAPredictor< Network, EdgeRndIt, ScoreRndIt, EdgeRndOutIt > Class Template Reference

Adamic Adar index link predictor.

```
#include <uadapredictor.hpp>
```

Inheritance diagram for LinkPred::UADAPredictor< Network, EdgeRndIt, ScoreRndIt, EdgeRndOutIt >:

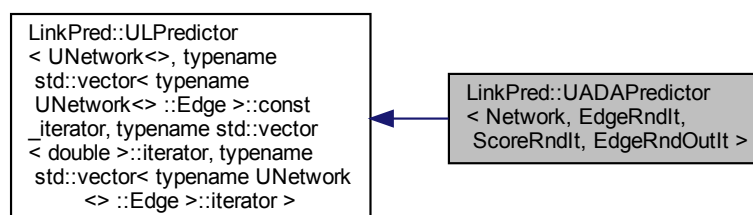

Collaboration diagram for LinkPred::UADAPredictor< Network, EdgeRndIt, ScoreRndIt, EdgeRndOutIt >:

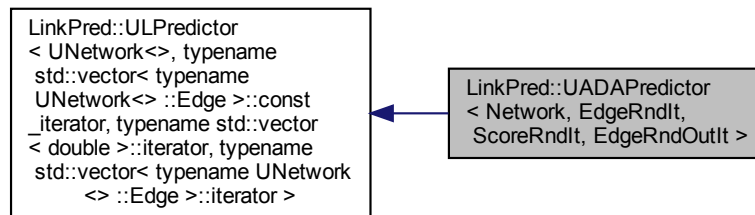

## Public Member Functions

- `UADAPredictor` (`std::shared_ptr< Network const > net`)
- `UADAPredictor` (`UADAPredictor const &that`)=default
- `UADAPredictor & operator=` (`UADAPredictor const &that`)=default
- `UADAPredictor` (`UADAPredictor &&that`)=default
- `UADAPredictor & operator=` (`UADAPredictor &&that`)=default
- virtual void `init` ()
- virtual void `learn` ()
- virtual double `score` (`Edge const &e`)
- virtual void `predict` (`EdgeRndIt begin`, `EdgeRndIt end`, `ScoreRndIt scores`)
- virtual `std::size_t top` (`std::size_t k`, `EdgeRndOutIt eit`, `ScoreRndIt sit`)
- virtual `~UADAPredictor` ()=default

## Additional Inherited Members

### 9.113.1 Detailed Description

```

template<typename Network = UNetwork<>, typename EdgeRndIt = typename std::vector<typename Network::Edge>::const_iterator,
typename ScoreRndIt = typename std::vector<double>::iterator, typename EdgeRndOutIt = typename std::vector<typename Network::Edge>::iterator>
class LinkPred::UADAPredictor< Network, EdgeRndIt, ScoreRndIt, EdgeRndOutIt >
  
```

Adamic Adar index link predictor.

#### Template Parameters

|                   |                                                   |
|-------------------|---------------------------------------------------|
| <i>Network</i>    | The network type.                                 |
| <i>EdgeRndIt</i>  | A random iterator type used to iterate on edges.  |
| <i>ScoreRndIt</i> | A random iterator type used to iterate on scores. |

## 9.113.2 Constructor & Destructor Documentation

### 9.113.2.1 UADAPredictor() [1/3]

```
template<typename Network = UNetwork<>, typename EdgeRndIt = typename std::vector<typename
Network::Edge>::const_iterator, typename ScoreRndIt = typename std::vector<double>::iterator,
typename EdgeRndOutIt = typename std::vector<typename Network::Edge>::iterator>
LinkPred::UADAPredictor< Network, EdgeRndIt, ScoreRndIt, EdgeRndOutIt >::UADAPredictor (
    std::shared_ptr< Network const > net ) [inline]
```

#### Parameters

|            |              |
|------------|--------------|
| <i>net</i> | The network. |
|------------|--------------|

### 9.113.2.2 UADAPredictor() [2/3]

```
template<typename Network = UNetwork<>, typename EdgeRndIt = typename std::vector<typename
Network::Edge>::const_iterator, typename ScoreRndIt = typename std::vector<double>::iterator,
typename EdgeRndOutIt = typename std::vector<typename Network::Edge>::iterator>
LinkPred::UADAPredictor< Network, EdgeRndIt, ScoreRndIt, EdgeRndOutIt >::UADAPredictor (
    UADAPredictor< Network, EdgeRndIt, ScoreRndIt, EdgeRndOutIt > const & that )
[default]
```

Copy constructor.

#### Parameters

|             |                     |
|-------------|---------------------|
| <i>that</i> | The object to copy. |
|-------------|---------------------|

### 9.113.2.3 UADAPredictor() [3/3]

```
template<typename Network = UNetwork<>, typename EdgeRndIt = typename std::vector<typename
Network::Edge>::const_iterator, typename ScoreRndIt = typename std::vector<double>::iterator,
typename EdgeRndOutIt = typename std::vector<typename Network::Edge>::iterator>
LinkPred::UADAPredictor< Network, EdgeRndIt, ScoreRndIt, EdgeRndOutIt >::UADAPredictor (
    UADAPredictor< Network, EdgeRndIt, ScoreRndIt, EdgeRndOutIt > && that ) [default]
```

Move constructor.

#### Parameters

|             |                     |
|-------------|---------------------|
| <i>that</i> | The object to move. |
|-------------|---------------------|

### 9.113.2.4 ~UADAPredictor()

```
template<typename Network = UNetwork<>, typename EdgeRndIt = typename std::vector<typename
Network::Edge>::const_iterator, typename ScoreRndIt = typename std::vector<double>::iterator,
typename EdgeRndOutIt = typename std::vector<typename Network::Edge>::iterator>
virtual LinkPred::UADAPredictor< Network, EdgeRndIt, ScoreRndIt, EdgeRndOutIt >::~~UADAPredictor
( ) [virtual], [default]
```

Destructor.

## 9.113.3 Member Function Documentation

### 9.113.3.1 init()

```
template<typename Network = UNetwork<>, typename EdgeRndIt = typename std::vector<typename
Network::Edge>::const_iterator, typename ScoreRndIt = typename std::vector<double>::iterator,
typename EdgeRndOutIt = typename std::vector<typename Network::Edge>::iterator>
virtual void LinkPred::UADAPredictor< Network, EdgeRndIt, ScoreRndIt, EdgeRndOutIt >::init ( )
[inline], [virtual]
```

Initialize the predictor.

Implements [LinkPred::ULPredictor< UNetwork<>, typename std::vector< typename UNetwork<> ::Edge >::const\\_iterator, typena](#)

### 9.113.3.2 learn()

```
template<typename Network = UNetwork<>, typename EdgeRndIt = typename std::vector<typename
Network::Edge>::const_iterator, typename ScoreRndIt = typename std::vector<double>::iterator,
typename EdgeRndOutIt = typename std::vector<typename Network::Edge>::iterator>
virtual void LinkPred::UADAPredictor< Network, EdgeRndIt, ScoreRndIt, EdgeRndOutIt >::learn (
) [inline], [virtual]
```

Learning.

Implements [LinkPred::ULPredictor< UNetwork<>, typename std::vector< typename UNetwork<> ::Edge >::const\\_iterator, typena](#)

### 9.113.3.3 operator=() [1/2]

```
template<typename Network = UNetwork<>, typename EdgeRndIt = typename std::vector<typename
Network::Edge>::const_iterator, typename ScoreRndIt = typename std::vector<double>::iterator,
typename EdgeRndOutIt = typename std::vector<typename Network::Edge>::iterator>
UADAPredictor& LinkPred::UADAPredictor< Network, EdgeRndIt, ScoreRndIt, EdgeRndOutIt >::operator=
(
    UADAPredictor< Network, EdgeRndIt, ScoreRndIt, EdgeRndOutIt > && that ) [default]
```

Move assignment operator.

## Parameters

|             |                     |
|-------------|---------------------|
| <i>that</i> | The object to move. |
|-------------|---------------------|

## 9.113.3.4 operator=() [2/2]

```
template<typename Network = UNetwork<>, typename EdgeRndIt = typename std::vector<typename
Network::Edge>::const_iterator, typename ScoreRndIt = typename std::vector<double>::iterator,
typename EdgeRndOutIt = typename std::vector<typename Network::Edge>::iterator>
UADAPredictor& LinkPred::UADAPredictor< Network, EdgeRndIt, ScoreRndIt, EdgeRndOutIt >::operator=
(
    UADAPredictor< Network, EdgeRndIt, ScoreRndIt, EdgeRndOutIt > const & that )
[default]
```

Copy assignment operator.

## Parameters

|             |                     |
|-------------|---------------------|
| <i>that</i> | The object to copy. |
|-------------|---------------------|

## 9.113.3.5 predict()

```
template<typename Network = UNetwork<>, typename EdgeRndIt = typename std::vector<typename
Network::Edge>::const_iterator, typename ScoreRndIt = typename std::vector<double>::iterator,
typename EdgeRndOutIt = typename std::vector<typename Network::Edge>::iterator>
virtual void LinkPred::UADAPredictor< Network, EdgeRndIt, ScoreRndIt, EdgeRndOutIt >::predict
(
    EdgeRndIt begin,
    EdgeRndIt end,
    ScoreRndIt scores ) [virtual]
```

Predict the links.

## Parameters

|               |                                         |
|---------------|-----------------------------------------|
| <i>begin</i>  | Beginning of the links to be predicted. |
| <i>end</i>    | end of the links to be predicted.       |
| <i>scores</i> | Beginning of scores.                    |

Reimplemented from [LinkPred::ULPredictor< UNetwork<>, typename std::vector< typename UNetwork<> ::Edge >::const\\_iterator](#)

## 9.113.3.6 score()

```
template<typename Network = UNetwork<>, typename EdgeRndIt = typename std::vector<typename
Network::Edge>::const_iterator, typename ScoreRndIt = typename std::vector<double>::iterator,
```

```

typename EdgeRndOutIt = typename std::vector<typename Network::Edge>::iterator>
virtual double LinkPred::UADAPredictor< Network, EdgeRndIt, ScoreRndIt, EdgeRndOutIt >::score
(
    Edge const & e ) [inline], [virtual]

```

Compute the score of a single edge.

#### Parameters

|          |           |
|----------|-----------|
| <i>e</i> | The edge. |
|----------|-----------|

#### Returns

The score of *e*.

### 9.113.3.7 top()

```

template<typename Network = UNetwork<>, typename EdgeRndIt = typename std::vector<typename
Network::Edge>::const_iterator, typename ScoreRndIt = typename std::vector<double>::iterator,
typename EdgeRndOutIt = typename std::vector<typename Network::Edge>::iterator>
virtual std::size_t LinkPred::UADAPredictor< Network, EdgeRndIt, ScoreRndIt, EdgeRndOutIt >↔
::top (
    std::size_t k,
    EdgeRndOutIt eit,
    ScoreRndIt sit ) [virtual]

```

Finds the *k* negative edges with the top score. Ties are broken randomly.

#### Parameters

|            |                                                                                                         |
|------------|---------------------------------------------------------------------------------------------------------|
| <i>k</i>   | The number of edges to find.                                                                            |
| <i>eit</i> | An output iterator where the edges are written.                                                         |
| <i>sit</i> | An output iterator where the scores are written. The scores are written in the same order as the edges. |

#### Returns

The number of negative edges inserted. It is the minimum between *k* and the number of negative edges in the network.

Reimplemented from [LinkPred::ULPredictor< UNetwork<>, typename std::vector< typename UNetwork<> ::Edge >::const\\_iterator](#)

The documentation for this class was generated from the following file:

- [include/linkpred/predictors/undirected/uadapredictor.hpp](#)



## 9.114 LinkPred::UCNEPredictor< Network, EdgeRndIt, ScoreRndIt, EdgeRndOutIt > Class Template Reference

Common neighbor link predictor.

```
#include <ucnepredictor.hpp>
```

Inheritance diagram for LinkPred::UCNEPredictor< Network, EdgeRndIt, ScoreRndIt, EdgeRndOutIt >:

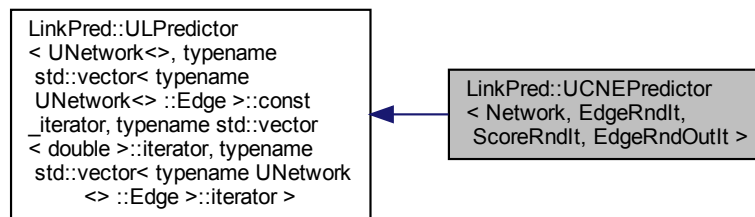

Collaboration diagram for LinkPred::UCNEPredictor< Network, EdgeRndIt, ScoreRndIt, EdgeRndOutIt >:

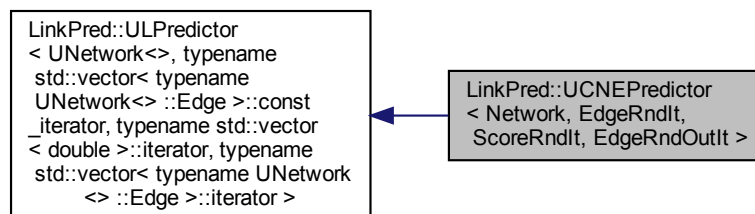

### Public Member Functions

- [UCNEPredictor](#) (std::shared\_ptr< [Network](#) const > net)
- [UCNEPredictor](#) ([UCNEPredictor](#) const &that)=default
- [UCNEPredictor](#) & [operator=](#) ([UCNEPredictor](#) const &that)=default
- [UCNEPredictor](#) ([UCNEPredictor](#) &&that)=default
- [UCNEPredictor](#) & [operator=](#) ([UCNEPredictor](#) &&that)=default
- virtual void [init](#) ()
- virtual void [learn](#) ()
- virtual void [predict](#) ([EdgeRndIt](#) begin, [EdgeRndIt](#) end, [ScoreRndIt](#) scores)
- virtual double [score](#) ([Edge](#) const &e)
- virtual std::size\_t [top](#) (std::size\_t k, [EdgeRndOutIt](#) eit, [ScoreRndIt](#) sit)
- virtual [~UCNEPredictor](#) ()=default

## Additional Inherited Members

### 9.114.1 Detailed Description

```
template<typename Network = UNetwork<>, typename EdgeRndIt = typename std::vector<typename Network::Edge>::const_iterator,
typename ScoreRndIt = typename std::vector<double>::iterator, typename EdgeRndOutIt = typename std::vector<typename Network::Edge>::iterator>
class LinkPred::UCNEPredictor< Network, EdgeRndIt, ScoreRndIt, EdgeRndOutIt >
```

Common neighbor link predictor.

#### Template Parameters

|                   |                                                   |
|-------------------|---------------------------------------------------|
| <i>Network</i>    | The network type.                                 |
| <i>EdgeRndIt</i>  | A random iterator type used to iterate on edges.  |
| <i>ScoreRndIt</i> | A random iterator type used to iterate on scores. |

### 9.114.2 Constructor & Destructor Documentation

#### 9.114.2.1 UCNEPredictor() [1/3]

```
template<typename Network = UNetwork<>, typename EdgeRndIt = typename std::vector<typename
Network::Edge>::const_iterator, typename ScoreRndIt = typename std::vector<double>::iterator,
typename EdgeRndOutIt = typename std::vector<typename Network::Edge>::iterator>
LinkPred::UCNEPredictor< Network, EdgeRndIt, ScoreRndIt, EdgeRndOutIt >::UCNEPredictor (
    std::shared_ptr< Network const > net ) [inline]
```

#### Parameters

|            |              |
|------------|--------------|
| <i>net</i> | The network. |
|------------|--------------|

#### 9.114.2.2 UCNEPredictor() [2/3]

```
template<typename Network = UNetwork<>, typename EdgeRndIt = typename std::vector<typename
Network::Edge>::const_iterator, typename ScoreRndIt = typename std::vector<double>::iterator,
typename EdgeRndOutIt = typename std::vector<typename Network::Edge>::iterator>
LinkPred::UCNEPredictor< Network, EdgeRndIt, ScoreRndIt, EdgeRndOutIt >::UCNEPredictor (
    UCNEPredictor< Network, EdgeRndIt, ScoreRndIt, EdgeRndOutIt > const & that )
[default]
```

Copy constructor.

## Parameters

|             |                     |
|-------------|---------------------|
| <i>that</i> | The object to copy. |
|-------------|---------------------|

## 9.114.2.3 UCNEPredictor() [3/3]

```
template<typename Network = UNetwork<>, typename EdgeRndIt = typename std::vector<typename
Network::Edge>::const_iterator, typename ScoreRndIt = typename std::vector<double>::iterator,
typename EdgeRndOutIt = typename std::vector<typename Network::Edge>::iterator>
LinkPred::UCNEPredictor< Network, EdgeRndIt, ScoreRndIt, EdgeRndOutIt >::UCNEPredictor (
    UCNEPredictor< Network, EdgeRndIt, ScoreRndIt, EdgeRndOutIt > && that ) [default]
```

Move constructor.

## Parameters

|             |                     |
|-------------|---------------------|
| <i>that</i> | The object to move. |
|-------------|---------------------|

## 9.114.2.4 ~UCNEPredictor()

```
template<typename Network = UNetwork<>, typename EdgeRndIt = typename std::vector<typename
Network::Edge>::const_iterator, typename ScoreRndIt = typename std::vector<double>::iterator,
typename EdgeRndOutIt = typename std::vector<typename Network::Edge>::iterator>
virtual LinkPred::UCNEPredictor< Network, EdgeRndIt, ScoreRndIt, EdgeRndOutIt >::~~UCNEPredictor
( ) [virtual], [default]
```

Destructor.

## 9.114.3 Member Function Documentation

## 9.114.3.1 init()

```
template<typename Network = UNetwork<>, typename EdgeRndIt = typename std::vector<typename
Network::Edge>::const_iterator, typename ScoreRndIt = typename std::vector<double>::iterator,
typename EdgeRndOutIt = typename std::vector<typename Network::Edge>::iterator>
virtual void LinkPred::UCNEPredictor< Network, EdgeRndIt, ScoreRndIt, EdgeRndOutIt >::init ( )
[inline], [virtual]
```

Initialize the solver.

Implements [LinkPred::ULPredictor< UNetwork<>, typename std::vector< typename UNetwork<> ::Edge >::const\\_iterator, typena](#)

### 9.114.3.2 learn()

```
template<typename Network = UNetwork<>, typename EdgeRndIt = typename std::vector<typename
Network::Edge>::const_iterator, typename ScoreRndIt = typename std::vector<double>::iterator,
typename EdgeRndOutIt = typename std::vector<typename Network::Edge>::iterator>
virtual void LinkPred::UCNEPredictor< Network, EdgeRndIt, ScoreRndIt, EdgeRndOutIt >::learn (
) [inline], [virtual]
```

Learn.

Implements [LinkPred::ULPredictor< UNetwork<>, typename std::vector< typename UNetwork<> ::Edge >::const\\_iterator, typen](#)

### 9.114.3.3 operator=() [1/2]

```
template<typename Network = UNetwork<>, typename EdgeRndIt = typename std::vector<typename
Network::Edge>::const_iterator, typename ScoreRndIt = typename std::vector<double>::iterator,
typename EdgeRndOutIt = typename std::vector<typename Network::Edge>::iterator>
UCNEPredictor& LinkPred::UCNEPredictor< Network, EdgeRndIt, ScoreRndIt, EdgeRndOutIt >::operator=
(
    UCNEPredictor< Network, EdgeRndIt, ScoreRndIt, EdgeRndOutIt > && that ) [default]
```

Move assignment operator.

#### Parameters

|             |                     |
|-------------|---------------------|
| <i>that</i> | The object to move. |
|-------------|---------------------|

### 9.114.3.4 operator=() [2/2]

```
template<typename Network = UNetwork<>, typename EdgeRndIt = typename std::vector<typename
Network::Edge>::const_iterator, typename ScoreRndIt = typename std::vector<double>::iterator,
typename EdgeRndOutIt = typename std::vector<typename Network::Edge>::iterator>
UCNEPredictor& LinkPred::UCNEPredictor< Network, EdgeRndIt, ScoreRndIt, EdgeRndOutIt >::operator=
(
    UCNEPredictor< Network, EdgeRndIt, ScoreRndIt, EdgeRndOutIt > const & that )
[default]
```

Copy assignment operator.

#### Parameters

|             |                     |
|-------------|---------------------|
| <i>that</i> | The object to copy. |
|-------------|---------------------|

### 9.114.3.5 predict()

```
template<typename Network = UNetwork<>, typename EdgeRndIt = typename std::vector<typename
Network::Edge>::const_iterator, typename ScoreRndIt = typename std::vector<double>::iterator,
typename EdgeRndOutIt = typename std::vector<typename Network::Edge>::iterator>
virtual void LinkPred::UCNEPredictor< Network, EdgeRndIt, ScoreRndIt, EdgeRndOutIt >::predict
(
    EdgeRndIt begin,
    EdgeRndIt end,
    ScoreRndIt scores ) [virtual]
```

Predict the links.

#### Parameters

|               |                                         |
|---------------|-----------------------------------------|
| <i>begin</i>  | Beginning of the links to be predicted. |
| <i>end</i>    | end of the links to be predicted.       |
| <i>scores</i> | Beginning of scores.                    |

Reimplemented from [LinkPred::ULPredictor< UNetwork<>, typename std::vector< typename UNetwork<> ::Edge >::const\\_iterator](#)

### 9.114.3.6 score()

```
template<typename Network = UNetwork<>, typename EdgeRndIt = typename std::vector<typename
Network::Edge>::const_iterator, typename ScoreRndIt = typename std::vector<double>::iterator,
typename EdgeRndOutIt = typename std::vector<typename Network::Edge>::iterator>
virtual double LinkPred::UCNEPredictor< Network, EdgeRndIt, ScoreRndIt, EdgeRndOutIt >::score
(
    Edge const & e ) [virtual]
```

Compute the score of a single edge.

#### Parameters

|          |           |
|----------|-----------|
| <i>e</i> | The edge. |
|----------|-----------|

#### Returns

The score of e.

### 9.114.3.7 top()

```
template<typename Network = UNetwork<>, typename EdgeRndIt = typename std::vector<typename
Network::Edge>::const_iterator, typename ScoreRndIt = typename std::vector<double>::iterator,
typename EdgeRndOutIt = typename std::vector<typename Network::Edge>::iterator>
```

```
virtual std::size_t LinkPred::UCNEPredictor< Network, EdgeRndIt, ScoreRndIt, EdgeRndOutIt >↵
::top (
    std::size_t k,
    EdgeRndOutIt eit,
    ScoreRndIt sit ) [virtual]
```

Finds the k negative edges with the top score. Ties are broken randomly.

#### Parameters

|            |                                                                                                         |
|------------|---------------------------------------------------------------------------------------------------------|
| <i>k</i>   | The number of edges to find.                                                                            |
| <i>eit</i> | An output iterator where the edges are written.                                                         |
| <i>sit</i> | An output iterator where the scores are written. The scores are written in the same order as the edges. |

#### Returns

The number of negative edges inserted. It is the minimum between k and the number of negative edges in the network.

Reimplemented from [LinkPred::ULPredictor< UNetwork<>, typename std::vector< typename UNetwork<> ::Edge >::const\\_iterator](#)

The documentation for this class was generated from the following file:

- [include/linkpred/predictors/undirected/ucnepredictor.hpp](#)

## 9.115 LinkPred::UCRAPredictor< Network, EdgeRndIt, ScoreRndIt, EdgeRndOutIt > Class Template Reference

Local path link predictor.

```
#include <ucrapredictor.hpp>
```

Inheritance diagram for LinkPred::UCRAPredictor< Network, EdgeRndIt, ScoreRndIt, EdgeRndOutIt >:

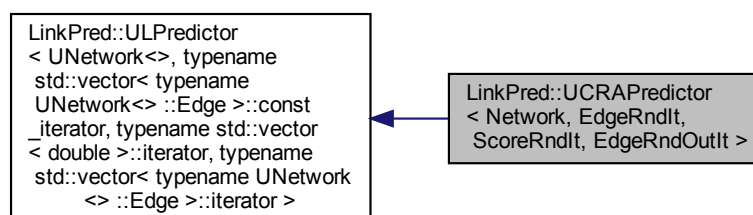

Collaboration diagram for LinkPred::UCRAPredictor< Network, EdgeRndIt, ScoreRndIt, EdgeRndOutIt >:

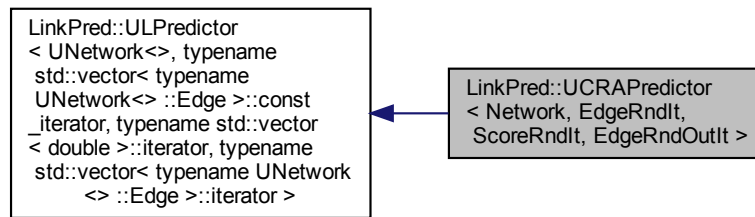

## Public Member Functions

- [UCRAPredictor](#) (std::shared\_ptr< [Network](#) const > net)
- [UCRAPredictor](#) ([UCRAPredictor](#) const &that)=default
- [UCRAPredictor](#) & [operator=](#) ([UCRAPredictor](#) const &that)=default
- [UCRAPredictor](#) ([UCRAPredictor](#) &&that)=default
- [UCRAPredictor](#) & [operator=](#) ([UCRAPredictor](#) &&that)=default
- virtual void [init](#) ()
- virtual void [learn](#) ()
- virtual double [score](#) (Edge const &e)
- virtual void [predict](#) ([EdgeRndIt](#) begin, [EdgeRndIt](#) end, [ScoreRndIt](#) scores)
- virtual std::size\_t [top](#) (std::size\_t k, [EdgeRndOutIt](#) eit, [ScoreRndIt](#) sit)
- virtual ~[UCRAPredictor](#) ()=default

## Additional Inherited Members

### 9.115.1 Detailed Description

```

template<typename Network = UNetwork<>, typename EdgeRndIt = typename std::vector<typename Network::Edge>::const_iterator,
typename ScoreRndIt = typename std::vector<double>::iterator, typename EdgeRndOutIt = typename std::vector<typename Network::Edge>::iterator>
class LinkPred::UCRAPredictor< Network, EdgeRndIt, ScoreRndIt, EdgeRndOutIt >
  
```

Local path link predictor.

#### Template Parameters

|                   |                                                   |
|-------------------|---------------------------------------------------|
| <i>Network</i>    | The network type.                                 |
| <i>EdgeRndIt</i>  | A random iterator type used to iterate on edges.  |
| <i>ScoreRndIt</i> | A random iterator type used to iterate on scores. |

## 9.115.2 Constructor & Destructor Documentation

### 9.115.2.1 UCRAPredictor() [1/3]

```
template<typename Network = UNetwork<>, typename EdgeRndIt = typename std::vector<typename
Network::Edge>::const_iterator, typename ScoreRndIt = typename std::vector<double>::iterator,
typename EdgeRndOutIt = typename std::vector<typename Network::Edge>::iterator>
LinkPred::UCRAPredictor< Network, EdgeRndIt, ScoreRndIt, EdgeRndOutIt >::UCRAPredictor (
    std::shared_ptr< Network const > net ) [inline]
```

#### Parameters

|            |              |
|------------|--------------|
| <i>net</i> | The network. |
|------------|--------------|

### 9.115.2.2 UCRAPredictor() [2/3]

```
template<typename Network = UNetwork<>, typename EdgeRndIt = typename std::vector<typename
Network::Edge>::const_iterator, typename ScoreRndIt = typename std::vector<double>::iterator,
typename EdgeRndOutIt = typename std::vector<typename Network::Edge>::iterator>
LinkPred::UCRAPredictor< Network, EdgeRndIt, ScoreRndIt, EdgeRndOutIt >::UCRAPredictor (
    UCRAPredictor< Network, EdgeRndIt, ScoreRndIt, EdgeRndOutIt > const & that )
[default]
```

Copy constructor.

#### Parameters

|             |                     |
|-------------|---------------------|
| <i>that</i> | The object to copy. |
|-------------|---------------------|

### 9.115.2.3 UCRAPredictor() [3/3]

```
template<typename Network = UNetwork<>, typename EdgeRndIt = typename std::vector<typename
Network::Edge>::const_iterator, typename ScoreRndIt = typename std::vector<double>::iterator,
typename EdgeRndOutIt = typename std::vector<typename Network::Edge>::iterator>
LinkPred::UCRAPredictor< Network, EdgeRndIt, ScoreRndIt, EdgeRndOutIt >::UCRAPredictor (
    UCRAPredictor< Network, EdgeRndIt, ScoreRndIt, EdgeRndOutIt > && that ) [default]
```

Move constructor.

#### Parameters

|             |                     |
|-------------|---------------------|
| <i>that</i> | The object to move. |
|-------------|---------------------|



#### 9.115.2.4 ~UCRAPredictor()

```
template<typename Network = UNetwork<>, typename EdgeRndIt = typename std::vector<typename
Network::Edge>::const_iterator, typename ScoreRndIt = typename std::vector<double>::iterator,
typename EdgeRndOutIt = typename std::vector<typename Network::Edge>::iterator>
virtual LinkPred::UCRAPredictor< Network, EdgeRndIt, ScoreRndIt, EdgeRndOutIt >::~~UCRAPredictor
( ) [virtual], [default]
```

Destructor.

### 9.115.3 Member Function Documentation

#### 9.115.3.1 init()

```
template<typename Network = UNetwork<>, typename EdgeRndIt = typename std::vector<typename
Network::Edge>::const_iterator, typename ScoreRndIt = typename std::vector<double>::iterator,
typename EdgeRndOutIt = typename std::vector<typename Network::Edge>::iterator>
virtual void LinkPred::UCRAPredictor< Network, EdgeRndIt, ScoreRndIt, EdgeRndOutIt >::init ( )
[inline], [virtual]
```

Initialize the predictor.

Implements [LinkPred::ULPredictor< UNetwork<>, typename std::vector< typename UNetwork<> ::Edge >::const\\_iterator, typen](#)

#### 9.115.3.2 learn()

```
template<typename Network = UNetwork<>, typename EdgeRndIt = typename std::vector<typename
Network::Edge>::const_iterator, typename ScoreRndIt = typename std::vector<double>::iterator,
typename EdgeRndOutIt = typename std::vector<typename Network::Edge>::iterator>
virtual void LinkPred::UCRAPredictor< Network, EdgeRndIt, ScoreRndIt, EdgeRndOutIt >::learn (
) [inline], [virtual]
```

Learn.

Implements [LinkPred::ULPredictor< UNetwork<>, typename std::vector< typename UNetwork<> ::Edge >::const\\_iterator, typen](#)

#### 9.115.3.3 operator=() [1/2]

```
template<typename Network = UNetwork<>, typename EdgeRndIt = typename std::vector<typename
Network::Edge>::const_iterator, typename ScoreRndIt = typename std::vector<double>::iterator,
typename EdgeRndOutIt = typename std::vector<typename Network::Edge>::iterator>
UCRAPredictor& LinkPred::UCRAPredictor< Network, EdgeRndIt, ScoreRndIt, EdgeRndOutIt >::operator=
(
    UCRAPredictor< Network, EdgeRndIt, ScoreRndIt, EdgeRndOutIt > && that ) [default]
```

Move assignment operator.

## Parameters

|             |                     |
|-------------|---------------------|
| <i>that</i> | The object to move. |
|-------------|---------------------|

**9.115.3.4 operator=()** [2/2]

```
template<typename Network = UNetwork<>, typename EdgeRndIt = typename std::vector<typename
Network::Edge>::const_iterator, typename ScoreRndIt = typename std::vector<double>::iterator,
typename EdgeRndOutIt = typename std::vector<typename Network::Edge>::iterator>
UCRAPredictor& LinkPred::UCRAPredictor< Network, EdgeRndIt, ScoreRndIt, EdgeRndOutIt >::operator=
(
    UCRAPredictor< Network, EdgeRndIt, ScoreRndIt, EdgeRndOutIt > const & that )
[default]
```

Copy assignment operator.

## Parameters

|             |                     |
|-------------|---------------------|
| <i>that</i> | The object to copy. |
|-------------|---------------------|

**9.115.3.5 predict()**

```
template<typename Network = UNetwork<>, typename EdgeRndIt = typename std::vector<typename
Network::Edge>::const_iterator, typename ScoreRndIt = typename std::vector<double>::iterator,
typename EdgeRndOutIt = typename std::vector<typename Network::Edge>::iterator>
virtual void LinkPred::UCRAPredictor< Network, EdgeRndIt, ScoreRndIt, EdgeRndOutIt >::predict
(
    EdgeRndIt begin,
    EdgeRndIt end,
    ScoreRndIt scores ) [virtual]
```

Predict the links.

## Parameters

|               |                                         |
|---------------|-----------------------------------------|
| <i>begin</i>  | Beginning of the links to be predicted. |
| <i>end</i>    | end of the links to be predicted.       |
| <i>scores</i> | Beginning of scores.                    |

Reimplemented from [LinkPred::ULPredictor< UNetwork<>, typename std::vector< typename UNetwork<> ::Edge >::const\\_iterator](#)

**9.115.3.6 score()**

```
template<typename Network = UNetwork<>, typename EdgeRndIt = typename std::vector<typename
Network::Edge>::const_iterator, typename ScoreRndIt = typename std::vector<double>::iterator,
```

```

typename EdgeRndOutIt = typename std::vector<typename Network::Edge>::iterator>
virtual double LinkPred::UCRAPredictor< Network, EdgeRndIt, ScoreRndIt, EdgeRndOutIt >::score
(
    Edge const & e ) [inline], [virtual]

```

Compute the score of a single edge.

#### Parameters

|          |           |
|----------|-----------|
| <i>e</i> | The edge. |
|----------|-----------|

#### Returns

The score of *e*.

### 9.115.3.7 top()

```

template<typename Network = UNetwork<>, typename EdgeRndIt = typename std::vector<typename
Network::Edge>::const_iterator, typename ScoreRndIt = typename std::vector<double>::iterator,
typename EdgeRndOutIt = typename std::vector<typename Network::Edge>::iterator>
virtual std::size_t LinkPred::UCRAPredictor< Network, EdgeRndIt, ScoreRndIt, EdgeRndOutIt >↔
::top (
    std::size_t k,
    EdgeRndOutIt eit,
    ScoreRndIt sit ) [virtual]

```

Finds the *k* negative edges with the top score. Ties are broken randomly.

#### Parameters

|            |                                                                                                         |
|------------|---------------------------------------------------------------------------------------------------------|
| <i>k</i>   | The number of edges to find.                                                                            |
| <i>eit</i> | An output iterator where the edges are written.                                                         |
| <i>sit</i> | An output iterator where the scores are written. The scores are written in the same order as the edges. |

#### Returns

The number of negative edges inserted. It is the minimum between *k* and the number of negative edges in the network.

Reimplemented from [LinkPred::ULPredictor< UNetwork<>, typename std::vector< typename UNetwork<> ::Edge >::const\\_iterator](#)

The documentation for this class was generated from the following file:

- [include/linkpred/predictors/undirected/ucrapredictor.hpp](#)

## 9.116 LinkPred::UCSTPredictor< Network, EdgeRndIt, ScoreRndIt, EdgeRndOutIt > Class Template Reference

Constant link predictor.

```
#include <ucstp predictor.hpp>
```

Inheritance diagram for LinkPred::UCSTPredictor< Network, EdgeRndIt, ScoreRndIt, EdgeRndOutIt >:

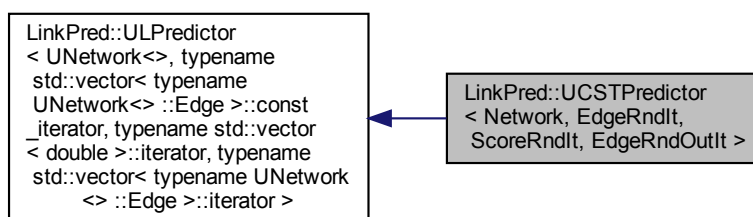

Collaboration diagram for LinkPred::UCSTPredictor< Network, EdgeRndIt, ScoreRndIt, EdgeRndOutIt >:

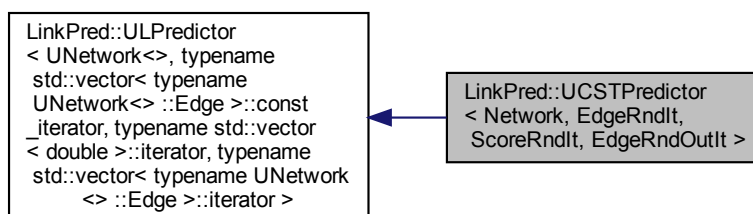

### Public Member Functions

- [UCSTPredictor](#) (std::shared\_ptr< [Network](#) const > net, long int seed)
- [UCSTPredictor](#) ([UCSTPredictor](#) const &that)=default
- [UCSTPredictor](#) & [operator=](#) ([UCSTPredictor](#) const &that)=default
- [UCSTPredictor](#) ([UCSTPredictor](#) &&that)=default
- [UCSTPredictor](#) & [operator=](#) ([UCSTPredictor](#) &&that)=default
- virtual void [init](#) ()
- virtual void [learn](#) ()
- virtual double [score](#) (Edge const &e)
- virtual void [predict](#) ([EdgeRndIt](#) begin, [EdgeRndIt](#) end, [ScoreRndIt](#) scores)
- virtual std::size\_t [top](#) (std::size\_t k, [EdgeRndOutIt](#) eit, [ScoreRndIt](#) sit)
- virtual [~UCSTPredictor](#) ()=default

## Additional Inherited Members

### 9.116.1 Detailed Description

```
template<typename Network = UNetwork<>, typename EdgeRndIt = typename std::vector<typename Network::Edge>::const_iterator,
typename ScoreRndIt = typename std::vector<double>::iterator, typename EdgeRndOutIt = typename std::vector<typename Network::Edge>::iterator>
class LinkPred::UCSTPredictor< Network, EdgeRndIt, ScoreRndIt, EdgeRndOutIt >
```

Constant link predictor.

#### Template Parameters

|                   |                                                   |
|-------------------|---------------------------------------------------|
| <i>Network</i>    | The network type.                                 |
| <i>EdgeRndIt</i>  | A random iterator type used to iterate on edges.  |
| <i>ScoreRndIt</i> | A random iterator type used to iterate on scores. |

### 9.116.2 Constructor & Destructor Documentation

#### 9.116.2.1 UCSTPredictor() [1/3]

```
template<typename Network = UNetwork<>, typename EdgeRndIt = typename std::vector<typename
Network::Edge>::const_iterator, typename ScoreRndIt = typename std::vector<double>::iterator,
typename EdgeRndOutIt = typename std::vector<typename Network::Edge>::iterator>
LinkPred::UCSTPredictor< Network, EdgeRndIt, ScoreRndIt, EdgeRndOutIt >::UCSTPredictor (
    std::shared_ptr< Network > const > net,
    long int seed ) [inline]
```

#### Parameters

|             |                                                                                                                                                                                    |
|-------------|------------------------------------------------------------------------------------------------------------------------------------------------------------------------------------|
| <i>net</i>  | The network.                                                                                                                                                                       |
| <i>seed</i> | Seed for the random number generator. This is used to select randomly k edges in the method top. Different calls to top return different set of edges, which the correct behavior. |

#### 9.116.2.2 UCSTPredictor() [2/3]

```
template<typename Network = UNetwork<>, typename EdgeRndIt = typename std::vector<typename
Network::Edge>::const_iterator, typename ScoreRndIt = typename std::vector<double>::iterator,
typename EdgeRndOutIt = typename std::vector<typename Network::Edge>::iterator>
LinkPred::UCSTPredictor< Network, EdgeRndIt, ScoreRndIt, EdgeRndOutIt >::UCSTPredictor (
    UCSTPredictor< Network, EdgeRndIt, ScoreRndIt, EdgeRndOutIt > const & that )
[default]
```

Copy constructor.

## Parameters

|             |                     |
|-------------|---------------------|
| <i>that</i> | The object to copy. |
|-------------|---------------------|

## 9.116.2.3 UCSTPredictor() [3/3]

```
template<typename Network = UNetwork<>, typename EdgeRndIt = typename std::vector<typename
Network::Edge>::const_iterator, typename ScoreRndIt = typename std::vector<double>::iterator,
typename EdgeRndOutIt = typename std::vector<typename Network::Edge>::iterator>
LinkPred::UCSTPredictor< Network, EdgeRndIt, ScoreRndIt, EdgeRndOutIt >::UCSTPredictor (
    UCSTPredictor< Network, EdgeRndIt, ScoreRndIt, EdgeRndOutIt > && that ) [default]
```

Move constructor.

## Parameters

|             |                     |
|-------------|---------------------|
| <i>that</i> | The object to move. |
|-------------|---------------------|

## 9.116.2.4 ~UCSTPredictor()

```
template<typename Network = UNetwork<>, typename EdgeRndIt = typename std::vector<typename
Network::Edge>::const_iterator, typename ScoreRndIt = typename std::vector<double>::iterator,
typename EdgeRndOutIt = typename std::vector<typename Network::Edge>::iterator>
virtual LinkPred::UCSTPredictor< Network, EdgeRndIt, ScoreRndIt, EdgeRndOutIt >::~~UCSTPredictor
( ) [virtual], [default]
```

Destructor.

## 9.116.3 Member Function Documentation

## 9.116.3.1 init()

```
template<typename Network = UNetwork<>, typename EdgeRndIt = typename std::vector<typename
Network::Edge>::const_iterator, typename ScoreRndIt = typename std::vector<double>::iterator,
typename EdgeRndOutIt = typename std::vector<typename Network::Edge>::iterator>
virtual void LinkPred::UCSTPredictor< Network, EdgeRndIt, ScoreRndIt, EdgeRndOutIt >::init ( )
[inline], [virtual]
```

Initialize the solver.

Implements [LinkPred::ULPredictor< UNetwork<>, typename std::vector< typename UNetwork<> ::Edge >::const\\_iterator, typena](#)

### 9.116.3.2 learn()

```
template<typename Network = UNetwork<>, typename EdgeRndIt = typename std::vector<typename
Network::Edge>::const_iterator, typename ScoreRndIt = typename std::vector<double>::iterator,
typename EdgeRndOutIt = typename std::vector<typename Network::Edge>::iterator>
virtual void LinkPred::UCSTPredictor< Network, EdgeRndIt, ScoreRndIt, EdgeRndOutIt >::learn (
) [inline], [virtual]
```

Learn.

Implements [LinkPred::ULPredictor< UNetwork<>, typename std::vector< typename UNetwork<> ::Edge >::const\\_iterator, typena](#)

### 9.116.3.3 operator=() [1/2]

```
template<typename Network = UNetwork<>, typename EdgeRndIt = typename std::vector<typename
Network::Edge>::const_iterator, typename ScoreRndIt = typename std::vector<double>::iterator,
typename EdgeRndOutIt = typename std::vector<typename Network::Edge>::iterator>
UCSTPredictor& LinkPred::UCSTPredictor< Network, EdgeRndIt, ScoreRndIt, EdgeRndOutIt >::operator=
(
    UCSTPredictor< Network, EdgeRndIt, ScoreRndIt, EdgeRndOutIt > && that ) [default]
```

Move assignment operator.

#### Parameters

|             |                     |
|-------------|---------------------|
| <i>that</i> | The object to move. |
|-------------|---------------------|

### 9.116.3.4 operator=() [2/2]

```
template<typename Network = UNetwork<>, typename EdgeRndIt = typename std::vector<typename
Network::Edge>::const_iterator, typename ScoreRndIt = typename std::vector<double>::iterator,
typename EdgeRndOutIt = typename std::vector<typename Network::Edge>::iterator>
UCSTPredictor& LinkPred::UCSTPredictor< Network, EdgeRndIt, ScoreRndIt, EdgeRndOutIt >::operator=
(
    UCSTPredictor< Network, EdgeRndIt, ScoreRndIt, EdgeRndOutIt > const & that )
[default]
```

Copy assignment operator.

#### Parameters

|             |                     |
|-------------|---------------------|
| <i>that</i> | The object to copy. |
|-------------|---------------------|



### 9.116.3.5 predict()

```
template<typename Network = UNetwork<>, typename EdgeRndIt = typename std::vector<typename
Network::Edge>::const_iterator, typename ScoreRndIt = typename std::vector<double>::iterator,
typename EdgeRndOutIt = typename std::vector<typename Network::Edge>::iterator>
virtual void LinkPred::UCSTP predictor< Network, EdgeRndIt, ScoreRndIt, EdgeRndOutIt >::predict
(
    EdgeRndIt begin,
    EdgeRndIt end,
    ScoreRndIt scores ) [virtual]
```

Predict the links.

#### Parameters

|               |                                         |
|---------------|-----------------------------------------|
| <i>begin</i>  | Beginning of the links to be predicted. |
| <i>end</i>    | end of the links to be predicted.       |
| <i>scores</i> | Beginning of scores.                    |

Reimplemented from [LinkPred::ULPredictor< UNetwork<>, typename std::vector< typename UNetwork<> ::Edge >::const\\_iterator](#)

### 9.116.3.6 score()

```
template<typename Network = UNetwork<>, typename EdgeRndIt = typename std::vector<typename
Network::Edge>::const_iterator, typename ScoreRndIt = typename std::vector<double>::iterator,
typename EdgeRndOutIt = typename std::vector<typename Network::Edge>::iterator>
virtual double LinkPred::UCSTP predictor< Network, EdgeRndIt, ScoreRndIt, EdgeRndOutIt >::score
(
    Edge const & e ) [inline], [virtual]
```

Compute the score of a single edge.

#### Parameters

|          |           |
|----------|-----------|
| <i>e</i> | The edge. |
|----------|-----------|

#### Returns

The score of e.

### 9.116.3.7 top()

```
template<typename Network = UNetwork<>, typename EdgeRndIt = typename std::vector<typename
Network::Edge>::const_iterator, typename ScoreRndIt = typename std::vector<double>::iterator,
typename EdgeRndOutIt = typename std::vector<typename Network::Edge>::iterator>
```

```
virtual std::size_t LinkPred::UCSTPredictor< Network, EdgeRndIt, ScoreRndIt, EdgeRndOutIt >↵
::top (
    std::size_t k,
    EdgeRndOutIt eit,
    ScoreRndIt sit ) [virtual]
```

Finds the k negative edges with the top score. Ties are broken randomly.

#### Parameters

|            |                                                                                                         |
|------------|---------------------------------------------------------------------------------------------------------|
| <i>k</i>   | The number of edges to find.                                                                            |
| <i>eit</i> | An output iterator where the edges are written.                                                         |
| <i>sit</i> | An output iterator where the scores are written. The scores are written in the same order as the edges. |

#### Returns

The number of negative edges inserted. It is the minimum between k and the number of negative edges in the network.

Reimplemented from [LinkPred::ULPredictor< UNetwork<>, typename std::vector< typename UNetwork<> ::Edge >::const\\_iterator](#)

The documentation for this class was generated from the following file:

- [include/linkpred/predictors/undirected/ucstpredictor.hpp](#)

## 9.117 LinkPred::UECLPredictor< Network, EdgeRndIt, ScoreRndIt, EdgeRndOutIt > Class Template Reference

Encoder-classifier link predictor.

```
#include <ueclpredictor.hpp>
```

Inheritance diagram for LinkPred::UECLPredictor< Network, EdgeRndIt, ScoreRndIt, EdgeRndOutIt >:

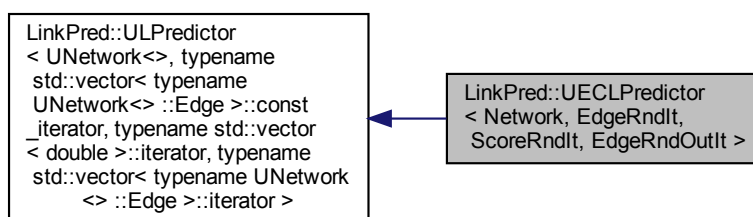

Collaboration diagram for LinkPred::UECLPredictor< Network, EdgeRndIt, ScoreRndIt, EdgeRndOutIt >:

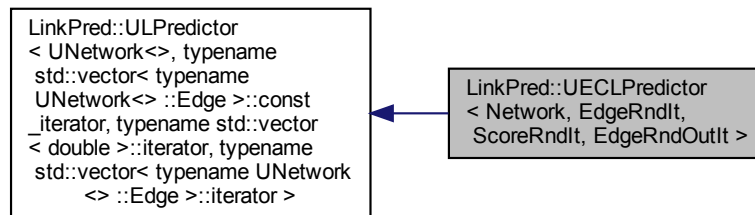

## Public Member Functions

- [UECLPredictor](#) (std::shared\_ptr< [Network](#) const > net, std::shared\_ptr< [Encoder](#)< [Network](#) > > encoder, std::shared\_ptr< [Classifier](#)<> > classifier, long int seed)
- [UECLPredictor](#) ([UECLPredictor](#) const &that)=default
- [UECLPredictor](#) & operator= ([UECLPredictor](#) const &that)=default
- [UECLPredictor](#) ([UECLPredictor](#) &&that)=default
- [UECLPredictor](#) & operator= ([UECLPredictor](#) &&that)=default
- virtual void [init](#) ()
- virtual void [learn](#) ()
- virtual double [score](#) (Edge const &e)
- const std::shared\_ptr< [Classifier](#)<> > & [getClassifier](#) () const
- const std::shared\_ptr< [Encoder](#)< [Network](#) > > & [getEncoder](#) () const
- void [setClassifier](#) (const std::shared\_ptr< [Classifier](#)<> > &classifier)
- void [setEncoder](#) (const std::shared\_ptr< [Encoder](#)< [Network](#) > > &encoder)
- double [getNegRatio](#) () const
- void [setNegRatio](#) (double negRatio)
- double [getPosRatio](#) () const
- void [setPosRatio](#) (double posRatio)
- virtual ~[UECLPredictor](#) ()=default

## Additional Inherited Members

### 9.117.1 Detailed Description

```

template<typename Network = UNetwork<>, typename EdgeRndIt = typename std::vector<typename Network::Edge>::const_iterator, typename ScoreRndIt = typename std::vector<double>::iterator, typename EdgeRndOutIt = typename std::vector<typename Network::Edge>::iterator>
class LinkPred::UECLPredictor< Network, EdgeRndIt, ScoreRndIt, EdgeRndOutIt >

```

Encoder-classifier link predictor.

#### Template Parameters

|                              |                                                   |
|------------------------------|---------------------------------------------------|
| <i>Network</i>               | The network type.                                 |
| <i>Edge</i><br><i>RndIt</i>  | A random iterator type used to iterate on edges.  |
| <i>Score</i><br><i>RndIt</i> | A random iterator type used to iterate on scores. |

## 9.117.2 Constructor & Destructor Documentation

### 9.117.2.1 UECLPredictor() [1/3]

```
template<typename Network = UNetwork<>, typename EdgeRndIt = typename std::vector<typename
Network::Edge>::const_iterator, typename ScoreRndIt = typename std::vector<double>::iterator,
typename EdgeRndOutIt = typename std::vector<typename Network::Edge>::iterator>
LinkPred::UECLPredictor< Network, EdgeRndIt, ScoreRndIt, EdgeRndOutIt >::UECLPredictor (
    std::shared_ptr< Network const > net,
    std::shared_ptr< Encoder< Network > > encoder,
    std::shared_ptr< Classifier<> > classifier,
    long int seed ) [inline]
```

#### Parameters

|                   |                                                                          |
|-------------------|--------------------------------------------------------------------------|
| <i>net</i>        | The network.                                                             |
| <i>encoder</i>    | The encoder used to embed the network.                                   |
| <i>classifier</i> | The classifier used to discriminate between positive and negative links. |
| <i>seed</i>       | Seed for the random number generator.                                    |

### 9.117.2.2 UECLPredictor() [2/3]

```
template<typename Network = UNetwork<>, typename EdgeRndIt = typename std::vector<typename
Network::Edge>::const_iterator, typename ScoreRndIt = typename std::vector<double>::iterator,
typename EdgeRndOutIt = typename std::vector<typename Network::Edge>::iterator>
LinkPred::UECLPredictor< Network, EdgeRndIt, ScoreRndIt, EdgeRndOutIt >::UECLPredictor (
    UECLPredictor< Network, EdgeRndIt, ScoreRndIt, EdgeRndOutIt > const & that )
[default]
```

Copy constructor.

#### Parameters

|             |                     |
|-------------|---------------------|
| <i>that</i> | The object to copy. |
|-------------|---------------------|

### 9.117.2.3 UECLPredictor() [3/3]

```
template<typename Network = UNetwork<>, typename EdgeRndIt = typename std::vector<typename
Network::Edge>::const_iterator, typename ScoreRndIt = typename std::vector<double>::iterator,
typename EdgeRndOutIt = typename std::vector<typename Network::Edge>::iterator>
LinkPred::UECLPredictor< Network, EdgeRndIt, ScoreRndIt, EdgeRndOutIt >::UECLPredictor (
    UECLPredictor< Network, EdgeRndIt, ScoreRndIt, EdgeRndOutIt > && that ) [default]
```

Move constructor.

## Parameters

|             |                     |
|-------------|---------------------|
| <i>that</i> | The object to move. |
|-------------|---------------------|

## 9.117.2.4 ~UECLPredictor()

```
template<typename Network = UNetwork<>, typename EdgeRndIt = typename std::vector<typename
Network::Edge>::const_iterator, typename ScoreRndIt = typename std::vector<double>::iterator,
typename EdgeRndOutIt = typename std::vector<typename Network::Edge>::iterator>
virtual LinkPred::UECLPredictor< Network, EdgeRndIt, ScoreRndIt, EdgeRndOutIt >::~~UECLPredictor
( ) [virtual], [default]
```

Destructor.

## 9.117.3 Member Function Documentation

## 9.117.3.1 getClassifier()

```
template<typename Network = UNetwork<>, typename EdgeRndIt = typename std::vector<typename
Network::Edge>::const_iterator, typename ScoreRndIt = typename std::vector<double>::iterator,
typename EdgeRndOutIt = typename std::vector<typename Network::Edge>::iterator>
const std::shared_ptr<Classifier<> >& LinkPred::UECLPredictor< Network, EdgeRndIt, ScoreRndIt,
EdgeRndOutIt >::getClassifier ( ) const [inline]
```

## Returns

The classifier.

## 9.117.3.2 getEncoder()

```
template<typename Network = UNetwork<>, typename EdgeRndIt = typename std::vector<typename
Network::Edge>::const_iterator, typename ScoreRndIt = typename std::vector<double>::iterator,
typename EdgeRndOutIt = typename std::vector<typename Network::Edge>::iterator>
const std::shared_ptr<Encoder<Network> >& LinkPred::UECLPredictor< Network, EdgeRndIt, ScoreRndIt,
EdgeRndOutIt >::getEncoder ( ) const [inline]
```

## Returns

The encoder.

### 9.117.3.3 getNegRatio()

```
template<typename Network = UNetwork<>, typename EdgeRndIt = typename std::vector<typename
Network::Edge>::const_iterator, typename ScoreRndIt = typename std::vector<double>::iterator,
typename EdgeRndOutIt = typename std::vector<typename Network::Edge>::iterator>
double LinkPred::UECLPredictor< Network, EdgeRndIt, ScoreRndIt, EdgeRndOutIt >::getNegRatio (
) const [inline]
```

#### Returns

Ratio of negative edges used in the training of the classifier.

### 9.117.3.4 getPosRatio()

```
template<typename Network = UNetwork<>, typename EdgeRndIt = typename std::vector<typename
Network::Edge>::const_iterator, typename ScoreRndIt = typename std::vector<double>::iterator,
typename EdgeRndOutIt = typename std::vector<typename Network::Edge>::iterator>
double LinkPred::UECLPredictor< Network, EdgeRndIt, ScoreRndIt, EdgeRndOutIt >::getPosRatio (
) const [inline]
```

#### Returns

Ratio of positive edges used in the training of the classifier.

### 9.117.3.5 init()

```
template<typename Network = UNetwork<>, typename EdgeRndIt = typename std::vector<typename
Network::Edge>::const_iterator, typename ScoreRndIt = typename std::vector<double>::iterator,
typename EdgeRndOutIt = typename std::vector<typename Network::Edge>::iterator>
virtual void LinkPred::UECLPredictor< Network, EdgeRndIt, ScoreRndIt, EdgeRndOutIt >::init ( )
[virtual]
```

Initialize the predictor.

Implements [LinkPred::ULPredictor< UNetwork<>, typename std::vector< typename UNetwork<> ::Edge >::const\\_iterator, typena](#)

### 9.117.3.6 learn()

```
template<typename Network = UNetwork<>, typename EdgeRndIt = typename std::vector<typename
Network::Edge>::const_iterator, typename ScoreRndIt = typename std::vector<double>::iterator,
typename EdgeRndOutIt = typename std::vector<typename Network::Edge>::iterator>
virtual void LinkPred::UECLPredictor< Network, EdgeRndIt, ScoreRndIt, EdgeRndOutIt >::learn (
) [virtual]
```

Learning.

Implements [LinkPred::ULPredictor< UNetwork<>, typename std::vector< typename UNetwork<> ::Edge >::const\\_iterator, typena](#)

**9.117.3.7 operator=()** [1/2]

```
template<typename Network = UNetwork<>, typename EdgeRndIt = typename std::vector<typename
Network::Edge>::const_iterator, typename ScoreRndIt = typename std::vector<double>::iterator,
typename EdgeRndOutIt = typename std::vector<typename Network::Edge>::iterator>
UECLPredictor& LinkPred::UECLPredictor< Network, EdgeRndIt, ScoreRndIt, EdgeRndOutIt >::operator=
(
    UECLPredictor< Network, EdgeRndIt, ScoreRndIt, EdgeRndOutIt > && that ) [default]
```

Move assignment operator.

**Parameters**

|             |                     |
|-------------|---------------------|
| <i>that</i> | The object to move. |
|-------------|---------------------|

**9.117.3.8 operator=()** [2/2]

```
template<typename Network = UNetwork<>, typename EdgeRndIt = typename std::vector<typename
Network::Edge>::const_iterator, typename ScoreRndIt = typename std::vector<double>::iterator,
typename EdgeRndOutIt = typename std::vector<typename Network::Edge>::iterator>
UECLPredictor& LinkPred::UECLPredictor< Network, EdgeRndIt, ScoreRndIt, EdgeRndOutIt >::operator=
(
    UECLPredictor< Network, EdgeRndIt, ScoreRndIt, EdgeRndOutIt > const & that )
[default]
```

Copy assignment operator.

**Parameters**

|             |                     |
|-------------|---------------------|
| <i>that</i> | The object to copy. |
|-------------|---------------------|

**9.117.3.9 score()**

```
template<typename Network = UNetwork<>, typename EdgeRndIt = typename std::vector<typename
Network::Edge>::const_iterator, typename ScoreRndIt = typename std::vector<double>::iterator,
typename EdgeRndOutIt = typename std::vector<typename Network::Edge>::iterator>
virtual double LinkPred::UECLPredictor< Network, EdgeRndIt, ScoreRndIt, EdgeRndOutIt >::score
(
    Edge const & e ) [virtual]
```

Compute the score of a single edge.

**Parameters**

|          |           |
|----------|-----------|
| <i>e</i> | The edge. |
|----------|-----------|

**Returns**

The score of e.

**9.117.3.10 setClassifier()**

```
template<typename Network = UNetwork<>, typename EdgeRndIt = typename std::vector<typename
Network::Edge>::const_iterator, typename ScoreRndIt = typename std::vector<double>::iterator,
typename EdgeRndOutIt = typename std::vector<typename Network::Edge>::iterator>
void LinkPred::UECLPredictor< Network, EdgeRndIt, ScoreRndIt, EdgeRndOutIt >::setClassifier (
    const std::shared_ptr< Classifier<> > & classifier ) [inline]
```

Set the classifier.

**Parameters**

|                   |                     |
|-------------------|---------------------|
| <i>classifier</i> | The new classifier. |
|-------------------|---------------------|

**9.117.3.11 setEncoder()**

```
template<typename Network = UNetwork<>, typename EdgeRndIt = typename std::vector<typename
Network::Edge>::const_iterator, typename ScoreRndIt = typename std::vector<double>::iterator,
typename EdgeRndOutIt = typename std::vector<typename Network::Edge>::iterator>
void LinkPred::UECLPredictor< Network, EdgeRndIt, ScoreRndIt, EdgeRndOutIt >::setEncoder (
    const std::shared_ptr< Encoder< Network > > & encoder ) [inline]
```

Set the encoder.

**Parameters**

|                |                  |
|----------------|------------------|
| <i>encoder</i> | The new encoder. |
|----------------|------------------|

**9.117.3.12 setNegRatio()**

```
template<typename Network = UNetwork<>, typename EdgeRndIt = typename std::vector<typename
Network::Edge>::const_iterator, typename ScoreRndIt = typename std::vector<double>::iterator,
typename EdgeRndOutIt = typename std::vector<typename Network::Edge>::iterator>
void LinkPred::UECLPredictor< Network, EdgeRndIt, ScoreRndIt, EdgeRndOutIt >::setNegRatio (
    double negRatio ) [inline]
```

Set the ratio of negative edges used in the training of the classifier.



## Parameters

|                 |                                                                 |
|-----------------|-----------------------------------------------------------------|
| <i>negRatio</i> | Ratio of negative edges used in the training of the classifier. |
|-----------------|-----------------------------------------------------------------|

## 9.117.3.13 setPosRatio()

```
template<typename Network = UNetwork<>, typename EdgeRndIt = typename std::vector<typename
Network::Edge>::const_iterator, typename ScoreRndIt = typename std::vector<double>::iterator,
typename EdgeRndOutIt = typename std::vector<typename Network::Edge>::iterator>
void LinkPred::UECLPredictor< Network, EdgeRndIt, ScoreRndIt, EdgeRndOutIt >::setPosRatio (
    double posRatio ) [inline]
```

Set the ratio of positive edges used in the training of the classifier.

## Parameters

|                 |                                                                 |
|-----------------|-----------------------------------------------------------------|
| <i>posRatio</i> | Ratio of positive edges used in the training of the classifier. |
|-----------------|-----------------------------------------------------------------|

The documentation for this class was generated from the following file:

- include/linkpred/predictors/undirected/[ueclpredictor.hpp](#)

## 9.118 LinkPred::UESMPredictor< Network, EdgeRndIt, ScoreRndIt, EdgeRndOutIt > Class Template Reference

Encoder-Similarity measure link predictor.

```
#include <uesmpredictor.hpp>
```

Inheritance diagram for LinkPred::UESMPredictor< Network, EdgeRndIt, ScoreRndIt, EdgeRndOutIt >:

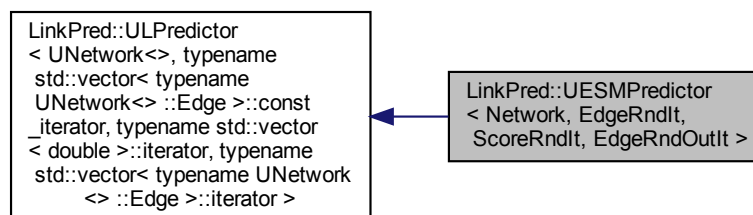

Collaboration diagram for LinkPred::UESMPredictor< Network, EdgeRndIt, ScoreRndIt, EdgeRndOutIt >:

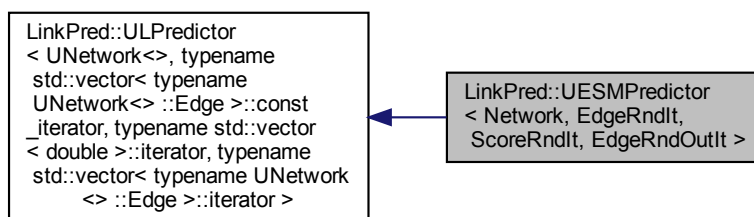

## Public Member Functions

- `UESMPredictor` (`std::shared_ptr< Network const > net`, `std::shared_ptr< Encoder< Network > > encoder`, `std::shared_ptr< SimMeasure > simMeasure`)
- `UESMPredictor` (`UESMPredictor const &that`)=default
- `UESMPredictor & operator=` (`UESMPredictor const &that`)=default
- `UESMPredictor` (`UESMPredictor &&that`)=default
- `UESMPredictor & operator=` (`UESMPredictor &&that`)=default
- virtual void `init` ()
- virtual void `learn` ()
- virtual double `score` (`Edge const &e`)
- const `std::shared_ptr< Encoder< Network > > & getEncoder` () const
- void `setEncoder` (`const std::shared_ptr< Encoder< Network > > &encoder`)
- const `std::shared_ptr< SimMeasure > & getSimMeasure` () const
- void `setSimMeasure` (`const std::shared_ptr< SimMeasure > &simMeasure`)
- virtual `~UESMPredictor` ()=default

## Additional Inherited Members

### 9.118.1 Detailed Description

```

template<typename Network = UNetwork<>, typename EdgeRndIt = typename std::vector<typename Network::Edge>::const_iterator,
typename ScoreRndIt = typename std::vector<double>::iterator, typename EdgeRndOutIt = typename std::vector<typename Network::Edge>::iterator>
class LinkPred::UESMPredictor< Network, EdgeRndIt, ScoreRndIt, EdgeRndOutIt >
  
```

Encoder-Similarity measure link predictor.

#### Template Parameters

|                   |                                                   |
|-------------------|---------------------------------------------------|
| <i>Network</i>    | The network type.                                 |
| <i>EdgeRndIt</i>  | A random iterator type used to iterate on edges.  |
| <i>ScoreRndIt</i> | A random iterator type used to iterate on scores. |

## 9.118.2 Constructor & Destructor Documentation

### 9.118.2.1 UESMPredictor() [1/3]

```
template<typename Network = UNetwork<>, typename EdgeRndIt = typename std::vector<typename
Network::Edge>::const_iterator, typename ScoreRndIt = typename std::vector<double>::iterator,
typename EdgeRndOutIt = typename std::vector<typename Network::Edge>::iterator>
LinkPred::UESMPredictor< Network, EdgeRndIt, ScoreRndIt, EdgeRndOutIt >::UESMPredictor (
    std::shared_ptr< Network const > net,
    std::shared_ptr< Encoder< Network > > encoder,
    std::shared_ptr< SimMeasure > simMeasure ) [inline]
```

#### Parameters

|                   |                                        |
|-------------------|----------------------------------------|
| <i>net</i>        | The network.                           |
| <i>encoder</i>    | The encoder used to embed the network. |
| <i>simMeasure</i> | The similarity measure.                |

### 9.118.2.2 UESMPredictor() [2/3]

```
template<typename Network = UNetwork<>, typename EdgeRndIt = typename std::vector<typename
Network::Edge>::const_iterator, typename ScoreRndIt = typename std::vector<double>::iterator,
typename EdgeRndOutIt = typename std::vector<typename Network::Edge>::iterator>
LinkPred::UESMPredictor< Network, EdgeRndIt, ScoreRndIt, EdgeRndOutIt >::UESMPredictor (
    UESMPredictor< Network, EdgeRndIt, ScoreRndIt, EdgeRndOutIt > const & that )
[default]
```

Copy constructor.

#### Parameters

|             |                     |
|-------------|---------------------|
| <i>that</i> | The object to copy. |
|-------------|---------------------|

### 9.118.2.3 UESMPredictor() [3/3]

```
template<typename Network = UNetwork<>, typename EdgeRndIt = typename std::vector<typename
Network::Edge>::const_iterator, typename ScoreRndIt = typename std::vector<double>::iterator,
typename EdgeRndOutIt = typename std::vector<typename Network::Edge>::iterator>
LinkPred::UESMPredictor< Network, EdgeRndIt, ScoreRndIt, EdgeRndOutIt >::UESMPredictor (
    UESMPredictor< Network, EdgeRndIt, ScoreRndIt, EdgeRndOutIt > && that ) [default]
```

Move constructor.

## Parameters

|             |                     |
|-------------|---------------------|
| <i>that</i> | The object to move. |
|-------------|---------------------|

## 9.118.2.4 ~UESMPredictor()

```
template<typename Network = UNetwork<>, typename EdgeRndIt = typename std::vector<typename
Network::Edge>::const_iterator, typename ScoreRndIt = typename std::vector<double>::iterator,
typename EdgeRndOutIt = typename std::vector<typename Network::Edge>::iterator>
virtual LinkPred::UESMPredictor< Network, EdgeRndIt, ScoreRndIt, EdgeRndOutIt >::~UESMPredictor
( ) [virtual], [default]
```

Destructor.

## 9.118.3 Member Function Documentation

## 9.118.3.1 getEncoder()

```
template<typename Network = UNetwork<>, typename EdgeRndIt = typename std::vector<typename
Network::Edge>::const_iterator, typename ScoreRndIt = typename std::vector<double>::iterator,
typename EdgeRndOutIt = typename std::vector<typename Network::Edge>::iterator>
const std::shared_ptr<Encoder<Network> > & LinkPred::UESMPredictor< Network, EdgeRndIt, ScoreRndIt,
EdgeRndOutIt >::getEncoder ( ) const [inline]
```

## Returns

The encoder.

## 9.118.3.2 getSimMeasure()

```
template<typename Network = UNetwork<>, typename EdgeRndIt = typename std::vector<typename
Network::Edge>::const_iterator, typename ScoreRndIt = typename std::vector<double>::iterator,
typename EdgeRndOutIt = typename std::vector<typename Network::Edge>::iterator>
const std::shared_ptr<SimMeasure> & LinkPred::UESMPredictor< Network, EdgeRndIt, ScoreRndIt,
EdgeRndOutIt >::getSimMeasure ( ) const [inline]
```

## Returns

The similarity measure.

### 9.118.3.3 init()

```
template<typename Network = UNetwork<>, typename EdgeRndIt = typename std::vector<typename
Network::Edge>::const_iterator, typename ScoreRndIt = typename std::vector<double>::iterator,
typename EdgeRndOutIt = typename std::vector<typename Network::Edge>::iterator>
virtual void LinkPred::UESMPredictor< Network, EdgeRndIt, ScoreRndIt, EdgeRndOutIt >::init ( )
[virtual]
```

Initialize the predictor.

Implements [LinkPred::ULPredictor< UNetwork<>, typename std::vector< typename UNetwork<> ::Edge >::const\\_iterator, typen](#)

### 9.118.3.4 learn()

```
template<typename Network = UNetwork<>, typename EdgeRndIt = typename std::vector<typename
Network::Edge>::const_iterator, typename ScoreRndIt = typename std::vector<double>::iterator,
typename EdgeRndOutIt = typename std::vector<typename Network::Edge>::iterator>
virtual void LinkPred::UESMPredictor< Network, EdgeRndIt, ScoreRndIt, EdgeRndOutIt >::learn (
) [virtual]
```

Learning.

Implements [LinkPred::ULPredictor< UNetwork<>, typename std::vector< typename UNetwork<> ::Edge >::const\\_iterator, typen](#)

### 9.118.3.5 operator=() [1/2]

```
template<typename Network = UNetwork<>, typename EdgeRndIt = typename std::vector<typename
Network::Edge>::const_iterator, typename ScoreRndIt = typename std::vector<double>::iterator,
typename EdgeRndOutIt = typename std::vector<typename Network::Edge>::iterator>
UESMPredictor& LinkPred::UESMPredictor< Network, EdgeRndIt, ScoreRndIt, EdgeRndOutIt >::operator=
(
    UESMPredictor< Network, EdgeRndIt, ScoreRndIt, EdgeRndOutIt > && that ) [default]
```

Move assignment operator.

#### Parameters

|             |                     |
|-------------|---------------------|
| <i>that</i> | The object to move. |
|-------------|---------------------|

### 9.118.3.6 operator=() [2/2]

```
template<typename Network = UNetwork<>, typename EdgeRndIt = typename std::vector<typename
Network::Edge>::const_iterator, typename ScoreRndIt = typename std::vector<double>::iterator,
typename EdgeRndOutIt = typename std::vector<typename Network::Edge>::iterator>
```

```
UESMPredictor& LinkPred::UESMPredictor< Network, EdgeRndIt, ScoreRndIt, EdgeRndOutIt >::operator=
(
    UESMPredictor< Network, EdgeRndIt, ScoreRndIt, EdgeRndOutIt > const & that )
[default]
```

Copy assignment operator.

#### Parameters

|             |                     |
|-------------|---------------------|
| <i>that</i> | The object to copy. |
|-------------|---------------------|

### 9.118.3.7 score()

```
template<typename Network = UNetwork<>, typename EdgeRndIt = typename std::vector<typename
Network::Edge>::const_iterator, typename ScoreRndIt = typename std::vector<double>::iterator,
typename EdgeRndOutIt = typename std::vector<typename Network::Edge>::iterator>
virtual double LinkPred::UESMPredictor< Network, EdgeRndIt, ScoreRndIt, EdgeRndOutIt >::score
(
    Edge const & e ) [virtual]
```

Compute the score of a single edge.

#### Parameters

|          |           |
|----------|-----------|
| <i>e</i> | The edge. |
|----------|-----------|

#### Returns

The score of e.

### 9.118.3.8 setEncoder()

```
template<typename Network = UNetwork<>, typename EdgeRndIt = typename std::vector<typename
Network::Edge>::const_iterator, typename ScoreRndIt = typename std::vector<double>::iterator,
typename EdgeRndOutIt = typename std::vector<typename Network::Edge>::iterator>
void LinkPred::UESMPredictor< Network, EdgeRndIt, ScoreRndIt, EdgeRndOutIt >::setEncoder (
    const std::shared_ptr< Encoder< Network > > & encoder ) [inline]
```

Set the encoder.

#### Parameters

|                |                  |
|----------------|------------------|
| <i>encoder</i> | The new encoder. |
|----------------|------------------|

## 9.118.3.9 setSimMeasure()

```
template<typename Network = UNetwork<>, typename EdgeRndIt = typename std::vector<typename
Network::Edge>::const_iterator, typename ScoreRndIt = typename std::vector<double>::iterator,
typename EdgeRndOutIt = typename std::vector<typename Network::Edge>::iterator>
void LinkPred::UESMPredictor< Network, EdgeRndIt, ScoreRndIt, EdgeRndOutIt >::setSimMeasure (
    const std::shared_ptr< SimMeasure > & simMeasure ) [inline]
```

Set the similarity measure.

## Parameters

|                   |                             |
|-------------------|-----------------------------|
| <i>simMeasure</i> | The new similarity measure. |
|-------------------|-----------------------------|

The documentation for this class was generated from the following file:

- include/linkpred/predictors/undirected/uesmpredictor.hpp

## 9.119 LinkPred::UFBMPredictor&lt; Network, EdgeRndIt, ScoreRndIt, EdgeRndOutIt &gt; Class Template Reference

Fast blocking model link predictor.

```
#include <ufbmpredictor.hpp>
```

Inheritance diagram for LinkPred::UFBMPredictor< Network, EdgeRndIt, ScoreRndIt, EdgeRndOutIt >:

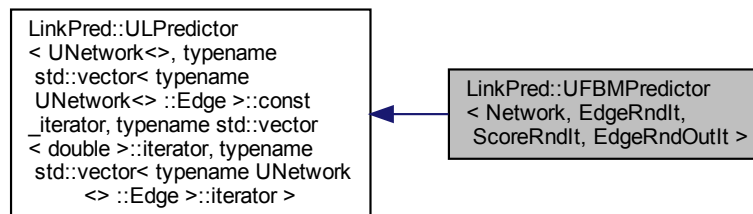

Collaboration diagram for LinkPred::UFBMPredictor< Network, EdgeRndIt, ScoreRndIt, EdgeRndOutIt >:

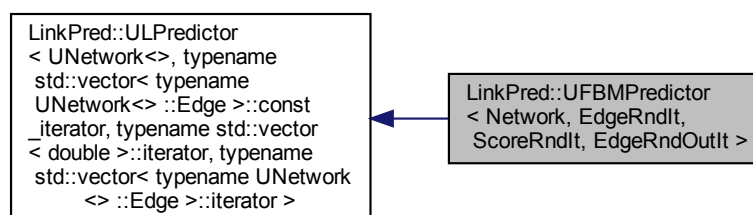

## Public Member Functions

- `UFBMPredictor` (`std::shared_ptr< Network const > net`, `long int seed`)
- `UFBMPredictor` (`UFBMPredictor const &that`)=default
- `UFBMPredictor & operator=` (`UFBMPredictor const &that`)=default
- `UFBMPredictor` (`UFBMPredictor &&that`)=default
- `UFBMPredictor & operator=` (`UFBMPredictor &&that`)=default
- virtual void `init` ()
- virtual void `learn` ()
- virtual double `score` (`Edge const &e`)
- virtual void `predict` (`EdgeRndIt begin`, `EdgeRndIt end`, `ScoreRndIt scores`)
- `std::size_t getMaxIter` () const
- void `setMaxIter` (`std::size_t maxIter`)
- virtual `~UFBMPredictor` ()=default

## Additional Inherited Members

### 9.119.1 Detailed Description

```
template<typename Network = UNetwork<>, typename EdgeRndIt = typename std::vector<typename Network::Edge>::const_iterator,
typename ScoreRndIt = typename std::vector<double>::iterator, typename EdgeRndOutIt = typename std::vector<typename Network::Edge>::iterator>
class LinkPred::UFBMPredictor< Network, EdgeRndIt, ScoreRndIt, EdgeRndOutIt >
```

Fast blocking model link predictor.

This is a C++ translation of the Matlab code provided by the authors.

#### Template Parameters

|                   |                                                   |
|-------------------|---------------------------------------------------|
| <i>Network</i>    | The network type.                                 |
| <i>EdgeRndIt</i>  | A random iterator type used to iterate on edges.  |
| <i>ScoreRndIt</i> | A random iterator type used to iterate on scores. |

### 9.119.2 Constructor & Destructor Documentation

#### 9.119.2.1 UFBMPredictor() [1/3]

```
template<typename Network = UNetwork<>, typename EdgeRndIt = typename std::vector<typename
Network::Edge>::const_iterator, typename ScoreRndIt = typename std::vector<double>::iterator,
typename EdgeRndOutIt = typename std::vector<typename Network::Edge>::iterator>
LinkPred::UFBMPredictor< Network, EdgeRndIt, ScoreRndIt, EdgeRndOutIt >::UFBMPredictor (
    std::shared_ptr< Network const > net,
    long int seed ) [inline]
```



## Parameters

|             |                               |
|-------------|-------------------------------|
| <i>net</i>  | The network.                  |
| <i>seed</i> | Random number generator seed. |

## 9.119.2.2 UFBMPredictor() [2/3]

```
template<typename Network = UNetwork<>, typename EdgeRndIt = typename std::vector<typename
Network::Edge>::const_iterator, typename ScoreRndIt = typename std::vector<double>::iterator,
typename EdgeRndOutIt = typename std::vector<typename Network::Edge>::iterator>
LinkPred::UFBMPredictor< Network, EdgeRndIt, ScoreRndIt, EdgeRndOutIt >::UFBMPredictor (
    UFBMPredictor< Network, EdgeRndIt, ScoreRndIt, EdgeRndOutIt > const & that )
[default]
```

Copy constructor.

## Parameters

|             |                     |
|-------------|---------------------|
| <i>that</i> | The object to copy. |
|-------------|---------------------|

## 9.119.2.3 UFBMPredictor() [3/3]

```
template<typename Network = UNetwork<>, typename EdgeRndIt = typename std::vector<typename
Network::Edge>::const_iterator, typename ScoreRndIt = typename std::vector<double>::iterator,
typename EdgeRndOutIt = typename std::vector<typename Network::Edge>::iterator>
LinkPred::UFBMPredictor< Network, EdgeRndIt, ScoreRndIt, EdgeRndOutIt >::UFBMPredictor (
    UFBMPredictor< Network, EdgeRndIt, ScoreRndIt, EdgeRndOutIt > && that ) [default]
```

Move constructor.

## Parameters

|             |                     |
|-------------|---------------------|
| <i>that</i> | The object to move. |
|-------------|---------------------|

## 9.119.2.4 ~UFBMPredictor()

```
template<typename Network = UNetwork<>, typename EdgeRndIt = typename std::vector<typename
Network::Edge>::const_iterator, typename ScoreRndIt = typename std::vector<double>::iterator,
typename EdgeRndOutIt = typename std::vector<typename Network::Edge>::iterator>
virtual LinkPred::UFBMPredictor< Network, EdgeRndIt, ScoreRndIt, EdgeRndOutIt >::~UFBMPredictor
( ) [virtual], [default]
```

Destructor.

## 9.119.3 Member Function Documentation

### 9.119.3.1 getMaxIter()

```
template<typename Network = UNetwork<>, typename EdgeRndIt = typename std::vector<typename
Network::Edge>::const_iterator, typename ScoreRndIt = typename std::vector<double>::iterator,
typename EdgeRndOutIt = typename std::vector<typename Network::Edge>::iterator>
std::size_t LinkPred::UFBMPredictor< Network, EdgeRndIt, ScoreRndIt, EdgeRndOutIt >::getMaxIter ( ) const [inline]
```

#### Returns

The maximum number of iterations.

### 9.119.3.2 init()

```
template<typename Network = UNetwork<>, typename EdgeRndIt = typename std::vector<typename
Network::Edge>::const_iterator, typename ScoreRndIt = typename std::vector<double>::iterator,
typename EdgeRndOutIt = typename std::vector<typename Network::Edge>::iterator>
virtual void LinkPred::UFBMPredictor< Network, EdgeRndIt, ScoreRndIt, EdgeRndOutIt >::init ( )
[virtual]
```

Initialize the solver.

Implements [LinkPred::ULPredictor< UNetwork<>, typename std::vector< typename UNetwork<> ::Edge >::const\\_iterator, typen](#)

### 9.119.3.3 learn()

```
template<typename Network = UNetwork<>, typename EdgeRndIt = typename std::vector<typename
Network::Edge>::const_iterator, typename ScoreRndIt = typename std::vector<double>::iterator,
typename EdgeRndOutIt = typename std::vector<typename Network::Edge>::iterator>
virtual void LinkPred::UFBMPredictor< Network, EdgeRndIt, ScoreRndIt, EdgeRndOutIt >::learn (
) [virtual]
```

Learn.

Implements [LinkPred::ULPredictor< UNetwork<>, typename std::vector< typename UNetwork<> ::Edge >::const\\_iterator, typen](#)

### 9.119.3.4 operator=() [1/2]

```
template<typename Network = UNetwork<>, typename EdgeRndIt = typename std::vector<typename
Network::Edge>::const_iterator, typename ScoreRndIt = typename std::vector<double>::iterator,
typename EdgeRndOutIt = typename std::vector<typename Network::Edge>::iterator>
UFBMPredictor& LinkPred::UFBMPredictor< Network, EdgeRndIt, ScoreRndIt, EdgeRndOutIt >::operator=
(
    UFBMPredictor< Network, EdgeRndIt, ScoreRndIt, EdgeRndOutIt > && that ) [default]
```

Move assignment operator.

## Parameters

|             |                     |
|-------------|---------------------|
| <i>that</i> | The object to move. |
|-------------|---------------------|

## 9.119.3.5 operator=() [2/2]

```
template<typename Network = UNetwork<>, typename EdgeRndIt = typename std::vector<typename
Network::Edge>::const_iterator, typename ScoreRndIt = typename std::vector<double>::iterator,
typename EdgeRndOutIt = typename std::vector<typename Network::Edge>::iterator>
UFBMPredictor& LinkPred::UFBMPredictor< Network, EdgeRndIt, ScoreRndIt, EdgeRndOutIt >::operator=
(
    UFBMPredictor< Network, EdgeRndIt, ScoreRndIt, EdgeRndOutIt > const & that )
[default]
```

Copy assignment operator.

## Parameters

|             |                     |
|-------------|---------------------|
| <i>that</i> | The object to copy. |
|-------------|---------------------|

## 9.119.3.6 predict()

```
template<typename Network = UNetwork<>, typename EdgeRndIt = typename std::vector<typename
Network::Edge>::const_iterator, typename ScoreRndIt = typename std::vector<double>::iterator,
typename EdgeRndOutIt = typename std::vector<typename Network::Edge>::iterator>
virtual void LinkPred::UFBMPredictor< Network, EdgeRndIt, ScoreRndIt, EdgeRndOutIt >::predict
(
    EdgeRndIt begin,
    EdgeRndIt end,
    ScoreRndIt scores ) [virtual]
```

Predict the links.

## Parameters

|               |                                         |
|---------------|-----------------------------------------|
| <i>begin</i>  | Beginning of the links to be predicted. |
| <i>end</i>    | end of the links to be predicted.       |
| <i>scores</i> | Beginning of scores.                    |

Reimplemented from [LinkPred::ULPredictor< UNetwork<>, typename std::vector< typename UNetwork<> ::Edge >::const\\_iterator](#)

## 9.119.3.7 score()

```
template<typename Network = UNetwork<>, typename EdgeRndIt = typename std::vector<typename
Network::Edge>::const_iterator, typename ScoreRndIt = typename std::vector<double>::iterator,
```

```

typename EdgeRndOutIt = typename std::vector<typename Network::Edge>::iterator>
virtual double LinkPred::UFBMPredictor< Network, EdgeRndIt, ScoreRndIt, EdgeRndOutIt >::score
(
    Edge const & e ) [inline], [virtual]

```

Compute the score of a single edge.

#### Parameters

|          |           |
|----------|-----------|
| <i>e</i> | The edge. |
|----------|-----------|

#### Returns

The score of *e*.

### 9.119.3.8 setMaxIter()

```

template<typename Network = UNetwork<>, typename EdgeRndIt = typename std::vector<typename
Network::Edge>::const_iterator, typename ScoreRndIt = typename std::vector<double>::iterator,
typename EdgeRndOutIt = typename std::vector<typename Network::Edge>::iterator>
void LinkPred::UFBMPredictor< Network, EdgeRndIt, ScoreRndIt, EdgeRndOutIt >::setMaxIter (
    std::size_t maxIter ) [inline]

```

Set the maximum number of iterations.

#### Parameters

|                |                                       |
|----------------|---------------------------------------|
| <i>maxIter</i> | The new maximum number of iterations. |
|----------------|---------------------------------------|

The documentation for this class was generated from the following file:

- include/linkpred/predictors/undirected/[ufbmpredictor.hpp](#)

## 9.120 LinkPred::UHDIPredictor< Network, EdgeRndIt, ScoreRndIt, EdgeRndOutIt > Class Template Reference

Hub depromoted index link predictor.

```
#include <uhdipredictor.hpp>
```

Inheritance diagram for LinkPred::UHDIPredictor< Network, EdgeRndIt, ScoreRndIt, EdgeRndOutIt >:

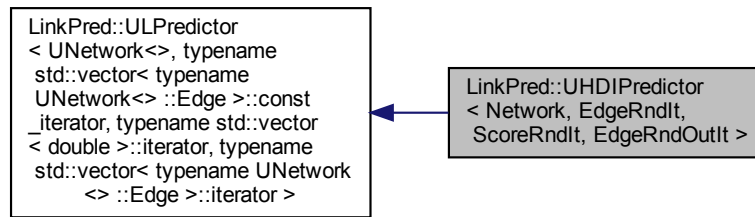

Collaboration diagram for LinkPred::UHDIPredictor< Network, EdgeRndIt, ScoreRndIt, EdgeRndOutIt >:

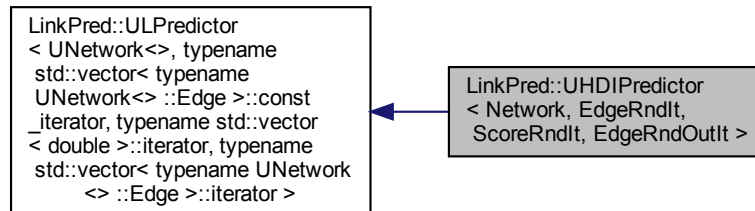

## Public Member Functions

- [UHDIPredictor](#) (std::shared\_ptr< [Network](#) const > net)
- [UHDIPredictor](#) ([UHDIPredictor](#) const &that)=default
- [UHDIPredictor](#) & [operator=](#) ([UHDIPredictor](#) const &that)=default
- [UHDIPredictor](#) ([UHDIPredictor](#) &&that)=default
- [UHDIPredictor](#) & [operator=](#) ([UHDIPredictor](#) &&that)=default
- virtual void [init](#) ()
- virtual void [learn](#) ()
- virtual double [score](#) ([Edge](#) const &e)
- virtual void [predict](#) ([EdgeRndIt](#) begin, [EdgeRndIt](#) end, [ScoreRndIt](#) scores)
- virtual std::size\_t [top](#) (std::size\_t k, [EdgeRndOutIt](#) eit, [ScoreRndIt](#) sit)
- virtual ~[UHDIPredictor](#) ()=default

## Additional Inherited Members

### 9.120.1 Detailed Description

```

template<typename Network = UNetwork<>, typename EdgeRndIt = typename std::vector<typename Network::Edge>::const_iterator, typename ScoreRndIt = typename std::vector<double>::iterator, typename EdgeRndOutIt = typename std::vector<typename Network::Edge>::iterator>
class LinkPred::UHDIPredictor< Network, EdgeRndIt, ScoreRndIt, EdgeRndOutIt >
  
```

Hub depromoted index link predictor.

## Template Parameters

|                                |                                                   |
|--------------------------------|---------------------------------------------------|
| <i>Network</i>                 | The network type.                                 |
| <i>Edge</i> ↔<br><i>RndIt</i>  | A random iterator type used to iterate on edges.  |
| <i>Score</i> ↔<br><i>RndIt</i> | A random iterator type used to iterate on scores. |

## 9.120.2 Constructor &amp; Destructor Documentation

## 9.120.2.1 UHDIPredictor() [1/3]

```
template<typename Network = UNetwork<>, typename EdgeRndIt = typename std::vector<typename
Network::Edge>::const_iterator, typename ScoreRndIt = typename std::vector<double>::iterator,
typename EdgeRndOutIt = typename std::vector<typename Network::Edge>::iterator>
LinkPred::UHDIPredictor< Network, EdgeRndIt, ScoreRndIt, EdgeRndOutIt >::UHDIPredictor (
    std::shared_ptr< Network const > net ) [inline]
```

## Parameters

|            |              |
|------------|--------------|
| <i>net</i> | The network. |
|------------|--------------|

## 9.120.2.2 UHDIPredictor() [2/3]

```
template<typename Network = UNetwork<>, typename EdgeRndIt = typename std::vector<typename
Network::Edge>::const_iterator, typename ScoreRndIt = typename std::vector<double>::iterator,
typename EdgeRndOutIt = typename std::vector<typename Network::Edge>::iterator>
LinkPred::UHDIPredictor< Network, EdgeRndIt, ScoreRndIt, EdgeRndOutIt >::UHDIPredictor (
    UHDIPredictor< Network, EdgeRndIt, ScoreRndIt, EdgeRndOutIt > const & that )
[default]
```

Copy constructor.

## Parameters

|             |                     |
|-------------|---------------------|
| <i>that</i> | The object to copy. |
|-------------|---------------------|

## 9.120.2.3 UHDIPredictor() [3/3]

```
template<typename Network = UNetwork<>, typename EdgeRndIt = typename std::vector<typename
Network::Edge>::const_iterator, typename ScoreRndIt = typename std::vector<double>::iterator,
```

```

typename EdgeRndOutIt = typename std::vector<typename Network::Edge>::iterator>
LinkPred::UHDIPredictor< Network, EdgeRndIt, ScoreRndIt, EdgeRndOutIt >::UHDIPredictor (
    UHDIPredictor< Network, EdgeRndIt, ScoreRndIt, EdgeRndOutIt > && that ) [default]

```

Move constructor.

#### Parameters

|             |                     |
|-------------|---------------------|
| <i>that</i> | The object to move. |
|-------------|---------------------|

### 9.120.2.4 ~UHDIPredictor()

```

template<typename Network = UNetwork<>, typename EdgeRndIt = typename std::vector<typename
Network::Edge>::const_iterator, typename ScoreRndIt = typename std::vector<double>::iterator,
typename EdgeRndOutIt = typename std::vector<typename Network::Edge>::iterator>
virtual LinkPred::UHDIPredictor< Network, EdgeRndIt, ScoreRndIt, EdgeRndOutIt >::~~UHDIPredictor
( ) [virtual], [default]

```

Destructor.

## 9.120.3 Member Function Documentation

### 9.120.3.1 init()

```

template<typename Network = UNetwork<>, typename EdgeRndIt = typename std::vector<typename
Network::Edge>::const_iterator, typename ScoreRndIt = typename std::vector<double>::iterator,
typename EdgeRndOutIt = typename std::vector<typename Network::Edge>::iterator>
virtual void LinkPred::UHDIPredictor< Network, EdgeRndIt, ScoreRndIt, EdgeRndOutIt >::init ( )
[inline], [virtual]

```

Initialize the predictor.

Implements [LinkPred::ULPredictor< UNetwork<>, typename std::vector< typename UNetwork<> ::Edge >::const\\_iterator, typena](#)

### 9.120.3.2 learn()

```

template<typename Network = UNetwork<>, typename EdgeRndIt = typename std::vector<typename
Network::Edge>::const_iterator, typename ScoreRndIt = typename std::vector<double>::iterator,
typename EdgeRndOutIt = typename std::vector<typename Network::Edge>::iterator>
virtual void LinkPred::UHDIPredictor< Network, EdgeRndIt, ScoreRndIt, EdgeRndOutIt >::learn (
) [inline], [virtual]

```

Learning.

Implements [LinkPred::ULPredictor< UNetwork<>, typename std::vector< typename UNetwork<> ::Edge >::const\\_iterator, typena](#)

### 9.120.3.3 operator=() [1/2]

```
template<typename Network = UNetwork<>, typename EdgeRndIt = typename std::vector<typename
Network::Edge>::const_iterator, typename ScoreRndIt = typename std::vector<double>::iterator,
typename EdgeRndOutIt = typename std::vector<typename Network::Edge>::iterator>
UHDIPredictor& LinkPred::UHDIPredictor< Network, EdgeRndIt, ScoreRndIt, EdgeRndOutIt >::operator=
(
    UHDIPredictor< Network, EdgeRndIt, ScoreRndIt, EdgeRndOutIt > && that ) [default]
```

Move assignment operator.

#### Parameters

|             |                     |
|-------------|---------------------|
| <i>that</i> | The object to move. |
|-------------|---------------------|

### 9.120.3.4 operator=() [2/2]

```
template<typename Network = UNetwork<>, typename EdgeRndIt = typename std::vector<typename
Network::Edge>::const_iterator, typename ScoreRndIt = typename std::vector<double>::iterator,
typename EdgeRndOutIt = typename std::vector<typename Network::Edge>::iterator>
UHDIPredictor& LinkPred::UHDIPredictor< Network, EdgeRndIt, ScoreRndIt, EdgeRndOutIt >::operator=
(
    UHDIPredictor< Network, EdgeRndIt, ScoreRndIt, EdgeRndOutIt > const & that )
[default]
```

Copy assignment operator.

#### Parameters

|             |                     |
|-------------|---------------------|
| <i>that</i> | The object to copy. |
|-------------|---------------------|

### 9.120.3.5 predict()

```
template<typename Network = UNetwork<>, typename EdgeRndIt = typename std::vector<typename
Network::Edge>::const_iterator, typename ScoreRndIt = typename std::vector<double>::iterator,
typename EdgeRndOutIt = typename std::vector<typename Network::Edge>::iterator>
virtual void LinkPred::UHDIPredictor< Network, EdgeRndIt, ScoreRndIt, EdgeRndOutIt >::predict
(
    EdgeRndIt begin,
    EdgeRndIt end,
    ScoreRndIt scores ) [virtual]
```

Predict the links.

#### Parameters

|               |                                         |
|---------------|-----------------------------------------|
| <i>begin</i>  | Beginning of the links to be predicted. |
| <i>end</i>    | end of the links to be predicted.       |
| <i>scores</i> | Beginning of scores.                    |



Reimplemented from [LinkPred::ULPredictor< UNetwork<>, typename std::vector< typename UNetwork<> ::Edge >::const\\_iterator](#)

### 9.120.3.6 score()

```
template<typename Network = UNetwork<>, typename EdgeRndIt = typename std::vector<typename
Network::Edge>::const_iterator, typename ScoreRndIt = typename std::vector<double>::iterator,
typename EdgeRndOutIt = typename std::vector<typename Network::Edge>::iterator>
virtual double LinkPred::UHDIPredictor< Network, EdgeRndIt, ScoreRndIt, EdgeRndOutIt >::score
(
    Edge const & e ) [inline], [virtual]
```

Compute the score of a single edge.

#### Parameters

|          |           |
|----------|-----------|
| <i>e</i> | The edge. |
|----------|-----------|

#### Returns

The score of *e*.

### 9.120.3.7 top()

```
template<typename Network = UNetwork<>, typename EdgeRndIt = typename std::vector<typename
Network::Edge>::const_iterator, typename ScoreRndIt = typename std::vector<double>::iterator,
typename EdgeRndOutIt = typename std::vector<typename Network::Edge>::iterator>
virtual std::size_t LinkPred::UHDIPredictor< Network, EdgeRndIt, ScoreRndIt, EdgeRndOutIt >↔
::top (
    std::size_t k,
    EdgeRndOutIt eit,
    ScoreRndIt sit ) [virtual]
```

Finds the *k* negative edges with the top score. Ties are broken randmly.

#### Parameters

|            |                                                                                                         |
|------------|---------------------------------------------------------------------------------------------------------|
| <i>k</i>   | The number of edges to find.                                                                            |
| <i>eit</i> | An output iterator where the edges are written.                                                         |
| <i>sit</i> | An output iterator where the scores are written. The scores are written in the same order as the edges. |

#### Returns

The number of negative edges inserted. It is the minimum between *k* and the number of negative edges in the network.

Reimplemented from [LinkPred::ULPredictor< UNetwork<>, typename std::vector< typename UNetwork<> ::Edge >::const\\_iterator](#)

The documentation for this class was generated from the following file:

- [include/linkpred/predictors/undirected/uhdipredictor.hpp](#)

## 9.121 LinkPred::UHPIPredictor< Network, EdgeRndIt, ScoreRndIt, EdgeRndOutIt > Class Template Reference

Hub promoted index link predictor.

```
#include <uhpipredictor.hpp>
```

Inheritance diagram for LinkPred::UHPIPredictor< Network, EdgeRndIt, ScoreRndIt, EdgeRndOutIt >:

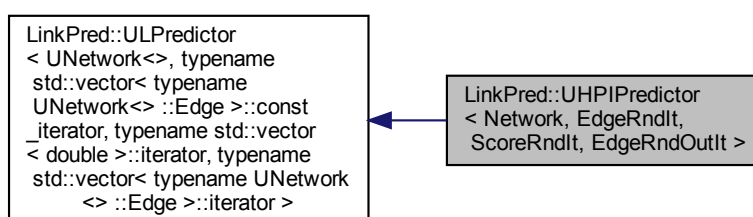

Collaboration diagram for LinkPred::UHPIPredictor< Network, EdgeRndIt, ScoreRndIt, EdgeRndOutIt >:

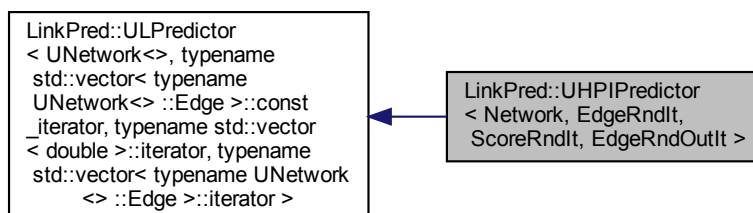

### Public Member Functions

- [UHPIPredictor](#) (std::shared\_ptr< [Network](#) const > net)
- [UHPIPredictor](#) ([UHPIPredictor](#) const &that)=default
- [UHPIPredictor](#) & [operator=](#) ([UHPIPredictor](#) const &that)=default
- [UHPIPredictor](#) ([UHPIPredictor](#) &&that)=default
- [UHPIPredictor](#) & [operator=](#) ([UHPIPredictor](#) &&that)=default
- virtual void [init](#) ()
- virtual void [learn](#) ()
- virtual double [score](#) (Edge const &e)
- virtual void [predict](#) ([EdgeRndIt](#) begin, [EdgeRndIt](#) end, [ScoreRndIt](#) scores)
- virtual std::size\_t [top](#) (std::size\_t k, [EdgeRndOutIt](#) eit, [ScoreRndIt](#) sit)
- virtual [~UHPIPredictor](#) ()=default

## Additional Inherited Members

### 9.121.1 Detailed Description

```
template<typename Network = UNetwork<>, typename EdgeRndIt = typename std::vector<typename Network::Edge>::const_iterator,
typename ScoreRndIt = typename std::vector<double>::iterator, typename EdgeRndOutIt = typename std::vector<typename Network::Edge>::iterator>
class LinkPred::UHPIPredictor< Network, EdgeRndIt, ScoreRndIt, EdgeRndOutIt >
```

Hub promoted index link predictor.

#### Template Parameters

|                   |                                                   |
|-------------------|---------------------------------------------------|
| <i>Network</i>    | The network type.                                 |
| <i>EdgeRndIt</i>  | A random iterator type used to iterate on edges.  |
| <i>ScoreRndIt</i> | A random iterator type used to iterate on scores. |

### 9.121.2 Constructor & Destructor Documentation

#### 9.121.2.1 UHPIPredictor() [1/3]

```
template<typename Network = UNetwork<>, typename EdgeRndIt = typename std::vector<typename
Network::Edge>::const_iterator, typename ScoreRndIt = typename std::vector<double>::iterator,
typename EdgeRndOutIt = typename std::vector<typename Network::Edge>::iterator>
LinkPred::UHPIPredictor< Network, EdgeRndIt, ScoreRndIt, EdgeRndOutIt >::UHPIPredictor (
    std::shared_ptr< Network const > net ) [inline]
```

#### Parameters

|            |              |
|------------|--------------|
| <i>net</i> | The network. |
|------------|--------------|

#### 9.121.2.2 UHPIPredictor() [2/3]

```
template<typename Network = UNetwork<>, typename EdgeRndIt = typename std::vector<typename
Network::Edge>::const_iterator, typename ScoreRndIt = typename std::vector<double>::iterator,
typename EdgeRndOutIt = typename std::vector<typename Network::Edge>::iterator>
LinkPred::UHPIPredictor< Network, EdgeRndIt, ScoreRndIt, EdgeRndOutIt >::UHPIPredictor (
    UHPIPredictor< Network, EdgeRndIt, ScoreRndIt, EdgeRndOutIt > const & that )
[default]
```

Copy constructor.

## Parameters

|             |                     |
|-------------|---------------------|
| <i>that</i> | The object to copy. |
|-------------|---------------------|

**9.121.2.3 UHPIPredictor()** [3/3]

```
template<typename Network = UNetwork<>, typename EdgeRndIt = typename std::vector<typename
Network::Edge>::const_iterator, typename ScoreRndIt = typename std::vector<double>::iterator,
typename EdgeRndOutIt = typename std::vector<typename Network::Edge>::iterator>
LinkPred::UHPIPredictor< Network, EdgeRndIt, ScoreRndIt, EdgeRndOutIt >::UHPIPredictor (
    UHPIPredictor< Network, EdgeRndIt, ScoreRndIt, EdgeRndOutIt > && that ) [default]
```

Move constructor.

## Parameters

|             |                     |
|-------------|---------------------|
| <i>that</i> | The object to move. |
|-------------|---------------------|

**9.121.2.4 ~UHPIPredictor()**

```
template<typename Network = UNetwork<>, typename EdgeRndIt = typename std::vector<typename
Network::Edge>::const_iterator, typename ScoreRndIt = typename std::vector<double>::iterator,
typename EdgeRndOutIt = typename std::vector<typename Network::Edge>::iterator>
virtual LinkPred::UHPIPredictor< Network, EdgeRndIt, ScoreRndIt, EdgeRndOutIt >::~~UHPIPredictor
( ) [virtual], [default]
```

Destructor.

**9.121.3 Member Function Documentation****9.121.3.1 init()**

```
template<typename Network = UNetwork<>, typename EdgeRndIt = typename std::vector<typename
Network::Edge>::const_iterator, typename ScoreRndIt = typename std::vector<double>::iterator,
typename EdgeRndOutIt = typename std::vector<typename Network::Edge>::iterator>
virtual void LinkPred::UHPIPredictor< Network, EdgeRndIt, ScoreRndIt, EdgeRndOutIt >::init ( )
[inline], [virtual]
```

Initialize the predictor.

Implements [LinkPred::ULPredictor< UNetwork<>, typename std::vector< typename UNetwork<> ::Edge >::const\\_iterator, typena](#)

### 9.121.3.2 learn()

```
template<typename Network = UNetwork<>, typename EdgeRndIt = typename std::vector<typename
Network::Edge>::const_iterator, typename ScoreRndIt = typename std::vector<double>::iterator,
typename EdgeRndOutIt = typename std::vector<typename Network::Edge>::iterator>
virtual void LinkPred::UHPIPredictor< Network, EdgeRndIt, ScoreRndIt, EdgeRndOutIt >::learn (
) [inline], [virtual]
```

Learning.

Implements [LinkPred::ULPredictor< UNetwork<>, typename std::vector< typename UNetwork<> ::Edge >::const\\_iterator, typen](#)

### 9.121.3.3 operator=() [1/2]

```
template<typename Network = UNetwork<>, typename EdgeRndIt = typename std::vector<typename
Network::Edge>::const_iterator, typename ScoreRndIt = typename std::vector<double>::iterator,
typename EdgeRndOutIt = typename std::vector<typename Network::Edge>::iterator>
UHPIPredictor& LinkPred::UHPIPredictor< Network, EdgeRndIt, ScoreRndIt, EdgeRndOutIt >::operator=
(
    UHPIPredictor< Network, EdgeRndIt, ScoreRndIt, EdgeRndOutIt > && that ) [default]
```

Move assignment operator.

#### Parameters

|             |                     |
|-------------|---------------------|
| <i>that</i> | The object to move. |
|-------------|---------------------|

### 9.121.3.4 operator=() [2/2]

```
template<typename Network = UNetwork<>, typename EdgeRndIt = typename std::vector<typename
Network::Edge>::const_iterator, typename ScoreRndIt = typename std::vector<double>::iterator,
typename EdgeRndOutIt = typename std::vector<typename Network::Edge>::iterator>
UHPIPredictor& LinkPred::UHPIPredictor< Network, EdgeRndIt, ScoreRndIt, EdgeRndOutIt >::operator=
(
    UHPIPredictor< Network, EdgeRndIt, ScoreRndIt, EdgeRndOutIt > const & that )
[default]
```

Copy assignment operator.

#### Parameters

|             |                     |
|-------------|---------------------|
| <i>that</i> | The object to copy. |
|-------------|---------------------|

### 9.121.3.5 predict()

```
template<typename Network = UNetwork<>, typename EdgeRndIt = typename std::vector<typename
Network::Edge>::const_iterator, typename ScoreRndIt = typename std::vector<double>::iterator,
typename EdgeRndOutIt = typename std::vector<typename Network::Edge>::iterator>
virtual void LinkPred::UHPIPredictor< Network, EdgeRndIt, ScoreRndIt, EdgeRndOutIt >::predict
(
    EdgeRndIt begin,
    EdgeRndIt end,
    ScoreRndIt scores ) [virtual]
```

Predict the links.

#### Parameters

|               |                                         |
|---------------|-----------------------------------------|
| <i>begin</i>  | Beginning of the links to be predicted. |
| <i>end</i>    | end of the links to be predicted.       |
| <i>scores</i> | Beginning of scores.                    |

Reimplemented from [LinkPred::ULPredictor< UNetwork<>, typename std::vector< typename UNetwork<> ::Edge >::const\\_iterator](#)

### 9.121.3.6 score()

```
template<typename Network = UNetwork<>, typename EdgeRndIt = typename std::vector<typename
Network::Edge>::const_iterator, typename ScoreRndIt = typename std::vector<double>::iterator,
typename EdgeRndOutIt = typename std::vector<typename Network::Edge>::iterator>
virtual double LinkPred::UHPIPredictor< Network, EdgeRndIt, ScoreRndIt, EdgeRndOutIt >::score
(
    Edge const & e ) [inline], [virtual]
```

Compute the score of a single edge.

#### Parameters

|          |           |
|----------|-----------|
| <i>e</i> | The edge. |
|----------|-----------|

#### Returns

The score of e.

### 9.121.3.7 top()

```
template<typename Network = UNetwork<>, typename EdgeRndIt = typename std::vector<typename
Network::Edge>::const_iterator, typename ScoreRndIt = typename std::vector<double>::iterator,
typename EdgeRndOutIt = typename std::vector<typename Network::Edge>::iterator>
```

```
virtual std::size_t LinkPred::UHPIPredictor< Network, EdgeRndIt, ScoreRndIt, EdgeRndOutIt >↵
::top (
    std::size_t k,
    EdgeRndOutIt eit,
    ScoreRndIt sit ) [virtual]
```

Finds the k negative edges with the top score. Ties are broken randmly.

#### Parameters

|            |                                                                                                         |
|------------|---------------------------------------------------------------------------------------------------------|
| <i>k</i>   | The number of edges to find.                                                                            |
| <i>eit</i> | An output iterator where the edges are written.                                                         |
| <i>sit</i> | An output iterator where the scores are written. The scores are written in the same order as the edges. |

#### Returns

The number of negative edges inserted. It is the minimum between k and the number of negative edges in the network.

Reimplemented from [LinkPred::ULPredictor< UNetwork<>, typename std::vector< typename UNetwork<> ::Edge >::const\\_iterator](#)

The documentation for this class was generated from the following file:

- [include/linkpred/predictors/undirected/uhipredictor.hpp](#)

## 9.122 LinkPred::UHRGPredictor< Network, EdgeRndIt, ScoreRndIt, EdgeRndOutIt > Class Template Reference

HRG predictor.

```
#include <uhrgpredictor.hpp>
```

Inheritance diagram for LinkPred::UHRGPredictor< Network, EdgeRndIt, ScoreRndIt, EdgeRndOutIt >:

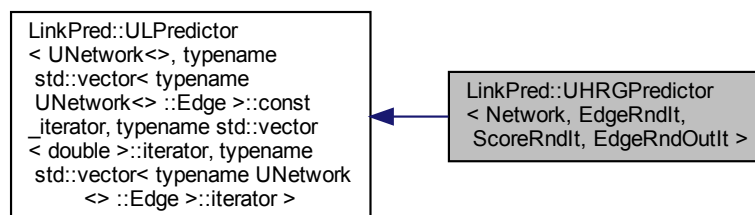

Collaboration diagram for LinkPred::UHRGPredictor< Network, EdgeRndIt, ScoreRndIt, EdgeRndOutIt >:

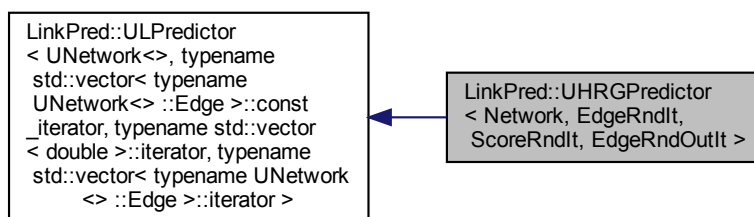

## Public Member Functions

- `UHRGPredictor` (`std::shared_ptr< Network const > net`, `long int seed`)
- `UHRGPredictor` (`UHRGPredictor const &that`)=delete
- `UHRGPredictor & operator=` (`UHRGPredictor const &that`)=delete
- `UHRGPredictor` (`UHRGPredictor &&that`)=delete
- `UHRGPredictor & operator=` (`UHRGPredictor &&that`)=delete
- virtual void `init` ()
- virtual void `learn` ()
- virtual double `score` (`Edge const &e`)
- virtual void `predict` (`EdgeRndIt begin`, `EdgeRndIt end`, `ScoreRndIt scores`)
- int `getNbBeans` () const
- void `setNbBeans` (int nbBeans)
- int `getNbSamples` () const
- void `setNbSamples` (int nbSamples)
- virtual `~UHRGPredictor` ()

## Additional Inherited Members

### 9.122.1 Detailed Description

```

template<typename Network = UNetwork<>, typename EdgeRndIt = typename std::vector<typename Network::Edge>↵
::const_iterator, typename ScoreRndIt = typename std::vector<double>::iterator, typename EdgeRndOutIt = typename std↵
::vector<typename Network::Edge>::iterator>
class LinkPred::UHRGPredictor< Network, EdgeRndIt, ScoreRndIt, EdgeRndOutIt >
  
```

HRG predictor.

This is actually a modified and wrapped version the code provided by the authors.

#### Template Parameters

|                         |                                                   |
|-------------------------|---------------------------------------------------|
| <i>Network</i>          | The network type.                                 |
| <i>Edge↵<br/>RndIt</i>  | A random iterator type used to iterate on edges.  |
| <i>Score↵<br/>RndIt</i> | A random iterator type used to iterate on scores. |



## 9.122.2 Constructor & Destructor Documentation

### 9.122.2.1 UHRGPredictor() [1/3]

```
template<typename Network = UNetwork<>, typename EdgeRndIt = typename std::vector<typename
Network::Edge>::const_iterator, typename ScoreRndIt = typename std::vector<double>::iterator,
typename EdgeRndOutIt = typename std::vector<typename Network::Edge>::iterator>
LinkPred::UHRGPredictor< Network, EdgeRndIt, ScoreRndIt, EdgeRndOutIt >::UHRGPredictor (
    std::shared_ptr< Network const > net,
    long int seed ) [inline]
```

#### Parameters

|             |                                     |
|-------------|-------------------------------------|
| <i>net</i>  | The network.                        |
| <i>seed</i> | The random number generator's seed. |

### 9.122.2.2 UHRGPredictor() [2/3]

```
template<typename Network = UNetwork<>, typename EdgeRndIt = typename std::vector<typename
Network::Edge>::const_iterator, typename ScoreRndIt = typename std::vector<double>::iterator,
typename EdgeRndOutIt = typename std::vector<typename Network::Edge>::iterator>
LinkPred::UHRGPredictor< Network, EdgeRndIt, ScoreRndIt, EdgeRndOutIt >::UHRGPredictor (
    UHRGPredictor< Network, EdgeRndIt, ScoreRndIt, EdgeRndOutIt > const & that )
[delete]
```

Copy constructor.

### 9.122.2.3 UHRGPredictor() [3/3]

```
template<typename Network = UNetwork<>, typename EdgeRndIt = typename std::vector<typename
Network::Edge>::const_iterator, typename ScoreRndIt = typename std::vector<double>::iterator,
typename EdgeRndOutIt = typename std::vector<typename Network::Edge>::iterator>
LinkPred::UHRGPredictor< Network, EdgeRndIt, ScoreRndIt, EdgeRndOutIt >::UHRGPredictor (
    UHRGPredictor< Network, EdgeRndIt, ScoreRndIt, EdgeRndOutIt > && that ) [delete]
```

Move constructor.

### 9.122.2.4 ~UHRGPredictor()

```
template<typename Network = UNetwork<>, typename EdgeRndIt = typename std::vector<typename
Network::Edge>::const_iterator, typename ScoreRndIt = typename std::vector<double>::iterator,
typename EdgeRndOutIt = typename std::vector<typename Network::Edge>::iterator>
virtual LinkPred::UHRGPredictor< Network, EdgeRndIt, ScoreRndIt, EdgeRndOutIt >::~~UHRGPredictor
( ) [virtual]
```

Destructor.

## 9.122.3 Member Function Documentation

### 9.122.3.1 getNbBeans()

```
template<typename Network = UNetwork<>, typename EdgeRndIt = typename std::vector<typename
Network::Edge>::const_iterator, typename ScoreRndIt = typename std::vector<double>::iterator,
typename EdgeRndOutIt = typename std::vector<typename Network::Edge>::iterator>
int LinkPred::UHRGPredictor< Network, EdgeRndIt, ScoreRndIt, EdgeRndOutIt >::getNbBeans ( )
const [inline]
```

#### Returns

The number of bins.

### 9.122.3.2 getNbSamples()

```
template<typename Network = UNetwork<>, typename EdgeRndIt = typename std::vector<typename
Network::Edge>::const_iterator, typename ScoreRndIt = typename std::vector<double>::iterator,
typename EdgeRndOutIt = typename std::vector<typename Network::Edge>::iterator>
int LinkPred::UHRGPredictor< Network, EdgeRndIt, ScoreRndIt, EdgeRndOutIt >::getNbSamples ( )
const [inline]
```

#### Returns

The number of samples.

### 9.122.3.3 init()

```
template<typename Network = UNetwork<>, typename EdgeRndIt = typename std::vector<typename
Network::Edge>::const_iterator, typename ScoreRndIt = typename std::vector<double>::iterator,
typename EdgeRndOutIt = typename std::vector<typename Network::Edge>::iterator>
virtual void LinkPred::UHRGPredictor< Network, EdgeRndIt, ScoreRndIt, EdgeRndOutIt >::init ( )
[virtual]
```

Initialize the solver.

Implements [LinkPred::ULPredictor< UNetwork<>, typename std::vector< typename UNetwork<> ::Edge >::const\\_iterator, typen](#)

#### 9.122.3.4 learn()

```
template<typename Network = UNetwork<>, typename EdgeRndIt = typename std::vector<typename
Network::Edge>::const_iterator, typename ScoreRndIt = typename std::vector<double>::iterator,
typename EdgeRndOutIt = typename std::vector<typename Network::Edge>::iterator>
virtual void LinkPred::UHRGPredictor< Network, EdgeRndIt, ScoreRndIt, EdgeRndOutIt >::learn (
) [virtual]
```

Learning.

Implements [LinkPred::ULPredictor< UNetwork<>, typename std::vector< typename UNetwork<> ::Edge >::const\\_iterator, typen](#)

#### 9.122.3.5 operator=() [1/2]

```
template<typename Network = UNetwork<>, typename EdgeRndIt = typename std::vector<typename
Network::Edge>::const_iterator, typename ScoreRndIt = typename std::vector<double>::iterator,
typename EdgeRndOutIt = typename std::vector<typename Network::Edge>::iterator>
UHRGPredictor& LinkPred::UHRGPredictor< Network, EdgeRndIt, ScoreRndIt, EdgeRndOutIt >::operator=
(
    UHRGPredictor< Network, EdgeRndIt, ScoreRndIt, EdgeRndOutIt > && that ) [delete]
```

Move assignment operator.

#### 9.122.3.6 operator=() [2/2]

```
template<typename Network = UNetwork<>, typename EdgeRndIt = typename std::vector<typename
Network::Edge>::const_iterator, typename ScoreRndIt = typename std::vector<double>::iterator,
typename EdgeRndOutIt = typename std::vector<typename Network::Edge>::iterator>
UHRGPredictor& LinkPred::UHRGPredictor< Network, EdgeRndIt, ScoreRndIt, EdgeRndOutIt >::operator=
(
    UHRGPredictor< Network, EdgeRndIt, ScoreRndIt, EdgeRndOutIt > const & that )
[delete]
```

Copy assignment operator.

#### 9.122.3.7 predict()

```
template<typename Network = UNetwork<>, typename EdgeRndIt = typename std::vector<typename
Network::Edge>::const_iterator, typename ScoreRndIt = typename std::vector<double>::iterator,
typename EdgeRndOutIt = typename std::vector<typename Network::Edge>::iterator>
virtual void LinkPred::UHRGPredictor< Network, EdgeRndIt, ScoreRndIt, EdgeRndOutIt >::predict
(
    EdgeRndIt begin,
    EdgeRndIt end,
    ScoreRndIt scores ) [virtual]
```

Predict the links.

## Parameters

|               |                                         |
|---------------|-----------------------------------------|
| <i>begin</i>  | Beginning of the links to be predicted. |
| <i>end</i>    | end of the links to be predicted.       |
| <i>scores</i> | Beginning of scores.                    |

Reimplemented from [LinkPred::ULPredictor< UNetwork<>, typename std::vector< typename UNetwork<> ::Edge >::const\\_iterator](#)

**9.122.3.8 score()**

```
template<typename Network = UNetwork<>, typename EdgeRndIt = typename std::vector<typename
Network::Edge>::const_iterator, typename ScoreRndIt = typename std::vector<double>::iterator,
typename EdgeRndOutIt = typename std::vector<typename Network::Edge>::iterator>
virtual double LinkPred::UHRGPredictor< Network, EdgeRndIt, ScoreRndIt, EdgeRndOutIt >::score
(
    Edge const & e ) [inline], [virtual]
```

Compute the score of a single edge.

## Parameters

|          |           |
|----------|-----------|
| <i>e</i> | The edge. |
|----------|-----------|

## Returns

The score of e.

**9.122.3.9 setNbBeans()**

```
template<typename Network = UNetwork<>, typename EdgeRndIt = typename std::vector<typename
Network::Edge>::const_iterator, typename ScoreRndIt = typename std::vector<double>::iterator,
typename EdgeRndOutIt = typename std::vector<typename Network::Edge>::iterator>
void LinkPred::UHRGPredictor< Network, EdgeRndIt, ScoreRndIt, EdgeRndOutIt >::setNbBeans (
    int nbBeans ) [inline]
```

Set the number of bins.

## Parameters

|                |                         |
|----------------|-------------------------|
| <i>nbBeans</i> | The new number of bins. |
|----------------|-------------------------|

### 9.122.3.10 setNbSamples()

```
template<typename Network = UNetwork<>, typename EdgeRndIt = typename std::vector<typename
Network::Edge>::const_iterator, typename ScoreRndIt = typename std::vector<double>::iterator,
typename EdgeRndOutIt = typename std::vector<typename Network::Edge>::iterator>
void LinkPred::UHRGPredictor< Network, EdgeRndIt, ScoreRndIt, EdgeRndOutIt >::setNbSamples (
    int nbSamples ) [inline]
```

Set the number of samples.

#### Parameters

|                  |                            |
|------------------|----------------------------|
| <i>nbSamples</i> | The new number of samples. |
|------------------|----------------------------|

The documentation for this class was generated from the following file:

- include/linkpred/predictors/undirected/[uhrgpredictor.hpp](#)

## 9.123 LinkPred::UHYPPredictor< Network, EdgeRndIt, ScoreRndIt, EdgeRndOutIt > Class Template Reference

Hypermap predictor.

```
#include <uhyppredictor.hpp>
```

Inheritance diagram for LinkPred::UHYPPredictor< Network, EdgeRndIt, ScoreRndIt, EdgeRndOutIt >:

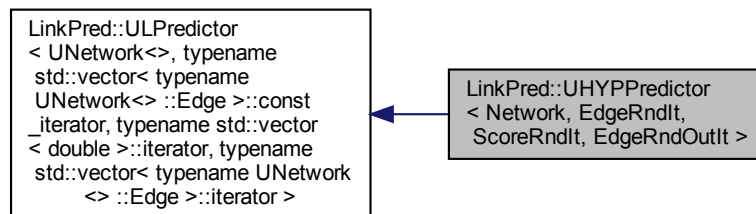

Collaboration diagram for LinkPred::UHYPPredictor< Network, EdgeRndIt, ScoreRndIt, EdgeRndOutIt >:

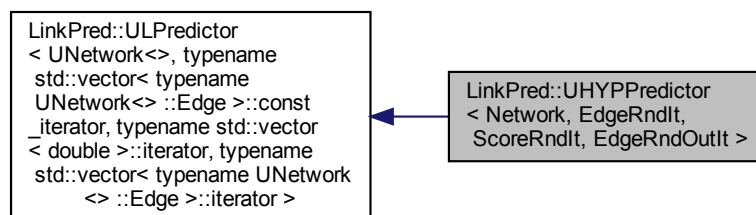

## Public Member Functions

- `UHYPPredictor` (`std::shared_ptr< Network const > net`, `long int seed`)
- `UHYPPredictor` (`UHYPPredictor const &that`)=`delete`
- `UHYPPredictor & operator=` (`UHYPPredictor const &that`)=`delete`
- `UHYPPredictor` (`UHYPPredictor &&that`)=`delete`
- `UHYPPredictor & operator=` (`UHYPPredictor &&that`)=`delete`
- virtual void `init` ()
- virtual void `learn` ()
- virtual double `score` (`Edge const &e`)
- virtual void `predict` (`EdgeRndIt` begin, `EdgeRndIt` end, `ScoreRndIt` scores)
- long int `getSeed` () const
- double `getGamma` () const
- void `setGamma` (double gamma)
- double `getL` () const
- void `setL` (double L)
- double `getM` () const
- void `setM` (double m)
- double `getT` () const
- void `setT` (double T)
- double `getZeta` () const
- void `setZeta` (double zeta)
- virtual `~UHYPPredictor` ()=`default`

## Additional Inherited Members

### 9.123.1 Detailed Description

```
template<typename Network = UNetwork<>, typename EdgeRndIt = typename std::vector<typename Network::Edge>::const_iterator,
        typename ScoreRndIt = typename std::vector<double>::iterator, typename EdgeRndOutIt = typename std::vector<typename Network::Edge>::iterator>
class LinkPred::UHYPPredictor< Network, EdgeRndIt, ScoreRndIt, EdgeRndOutIt >
```

Hypermap predictor.

This is a modified and wrapped version of the code provided by the authors.

#### Template Parameters

|                                               |                                                   |
|-----------------------------------------------|---------------------------------------------------|
| <i>Network</i>                                | The network type.                                 |
| <i>Edge<math>\leftrightarrow</math>RndIt</i>  | A random iterator type used to iterate on edges.  |
| <i>Score<math>\leftrightarrow</math>RndIt</i> | A random iterator type used to iterate on scores. |

### 9.123.2 Constructor & Destructor Documentation

### 9.123.2.1 UHYPPredictor() [1/3]

```
template<typename Network = UNetwork<>, typename EdgeRndIt = typename std::vector<typename
Network::Edge>::const_iterator, typename ScoreRndIt = typename std::vector<double>::iterator,
typename EdgeRndOutIt = typename std::vector<typename Network::Edge>::iterator>
LinkPred::UHYPPredictor< Network, EdgeRndIt, ScoreRndIt, EdgeRndOutIt >::UHYPPredictor (
    std::shared_ptr< Network > const > net,
    long int seed ) [inline]
```

#### Parameters

|             |                                     |
|-------------|-------------------------------------|
| <i>net</i>  | The network.                        |
| <i>seed</i> | The random number generator's seed. |

### 9.123.2.2 UHYPPredictor() [2/3]

```
template<typename Network = UNetwork<>, typename EdgeRndIt = typename std::vector<typename
Network::Edge>::const_iterator, typename ScoreRndIt = typename std::vector<double>::iterator,
typename EdgeRndOutIt = typename std::vector<typename Network::Edge>::iterator>
LinkPred::UHYPPredictor< Network, EdgeRndIt, ScoreRndIt, EdgeRndOutIt >::UHYPPredictor (
    UHYPPredictor< Network, EdgeRndIt, ScoreRndIt, EdgeRndOutIt > const & that )
[delete]
```

Copy constructor.

#### Parameters

|             |                     |
|-------------|---------------------|
| <i>that</i> | The object to copy. |
|-------------|---------------------|

### 9.123.2.3 UHYPPredictor() [3/3]

```
template<typename Network = UNetwork<>, typename EdgeRndIt = typename std::vector<typename
Network::Edge>::const_iterator, typename ScoreRndIt = typename std::vector<double>::iterator,
typename EdgeRndOutIt = typename std::vector<typename Network::Edge>::iterator>
LinkPred::UHYPPredictor< Network, EdgeRndIt, ScoreRndIt, EdgeRndOutIt >::UHYPPredictor (
    UHYPPredictor< Network, EdgeRndIt, ScoreRndIt, EdgeRndOutIt > && that ) [delete]
```

Move constructor.

#### Parameters

|             |                     |
|-------------|---------------------|
| <i>that</i> | The object to move. |
|-------------|---------------------|

#### 9.123.2.4 ~UHYPredictor()

```
template<typename Network = UNetwork<>, typename EdgeRndIt = typename std::vector<typename
Network::Edge>::const_iterator, typename ScoreRndIt = typename std::vector<double>::iterator,
typename EdgeRndOutIt = typename std::vector<typename Network::Edge>::iterator>
virtual LinkPred::UHYPredictor< Network, EdgeRndIt, ScoreRndIt, EdgeRndOutIt >::~~UHYPredictor
( ) [virtual], [default]
```

Destructor.

### 9.123.3 Member Function Documentation

#### 9.123.3.1 getGamma()

```
template<typename Network = UNetwork<>, typename EdgeRndIt = typename std::vector<typename
Network::Edge>::const_iterator, typename ScoreRndIt = typename std::vector<double>::iterator,
typename EdgeRndOutIt = typename std::vector<typename Network::Edge>::iterator>
double LinkPred::UHYPredictor< Network, EdgeRndIt, ScoreRndIt, EdgeRndOutIt >::getGamma ( )
const [inline]
```

##### Returns

The power law exponent gamma (see the algorithm description).

#### 9.123.3.2 getL()

```
template<typename Network = UNetwork<>, typename EdgeRndIt = typename std::vector<typename
Network::Edge>::const_iterator, typename ScoreRndIt = typename std::vector<double>::iterator,
typename EdgeRndOutIt = typename std::vector<typename Network::Edge>::iterator>
double LinkPred::UHYPredictor< Network, EdgeRndIt, ScoreRndIt, EdgeRndOutIt >::getL ( ) const
[inline]
```

##### Returns

The parameter L (see the algorithm description).

#### 9.123.3.3 getM()

```
template<typename Network = UNetwork<>, typename EdgeRndIt = typename std::vector<typename
Network::Edge>::const_iterator, typename ScoreRndIt = typename std::vector<double>::iterator,
typename EdgeRndOutIt = typename std::vector<typename Network::Edge>::iterator>
double LinkPred::UHYPredictor< Network, EdgeRndIt, ScoreRndIt, EdgeRndOutIt >::getM ( ) const
[inline]
```

##### Returns

The parameter m (see the algorithm description).



#### 9.123.3.4 getSeed()

```
template<typename Network = UNetwork<>, typename EdgeRndIt = typename std::vector<typename
Network::Edge>::const_iterator, typename ScoreRndIt = typename std::vector<double>::iterator,
typename EdgeRndOutIt = typename std::vector<typename Network::Edge>::iterator>
long int LinkPred::UHYPPredictor< Network, EdgeRndIt, ScoreRndIt, EdgeRndOutIt >::getSeed ( )
const [inline]
```

##### Returns

The random number generator seed.

#### 9.123.3.5 getT()

```
template<typename Network = UNetwork<>, typename EdgeRndIt = typename std::vector<typename
Network::Edge>::const_iterator, typename ScoreRndIt = typename std::vector<double>::iterator,
typename EdgeRndOutIt = typename std::vector<typename Network::Edge>::iterator>
double LinkPred::UHYPPredictor< Network, EdgeRndIt, ScoreRndIt, EdgeRndOutIt >::getT ( ) const
[inline]
```

##### Returns

The parameter L (see the algorithm description).

#### 9.123.3.6 getZeta()

```
template<typename Network = UNetwork<>, typename EdgeRndIt = typename std::vector<typename
Network::Edge>::const_iterator, typename ScoreRndIt = typename std::vector<double>::iterator,
typename EdgeRndOutIt = typename std::vector<typename Network::Edge>::iterator>
double LinkPred::UHYPPredictor< Network, EdgeRndIt, ScoreRndIt, EdgeRndOutIt >::getZeta ( )
const [inline]
```

##### Returns

The parameter zeta (see the algorithm description).

#### 9.123.3.7 init()

```
template<typename Network = UNetwork<>, typename EdgeRndIt = typename std::vector<typename
Network::Edge>::const_iterator, typename ScoreRndIt = typename std::vector<double>::iterator,
typename EdgeRndOutIt = typename std::vector<typename Network::Edge>::iterator>
virtual void LinkPred::UHYPPredictor< Network, EdgeRndIt, ScoreRndIt, EdgeRndOutIt >::init ( )
[virtual]
```

Initialize the solver.

Implements [LinkPred::ULPredictor< UNetwork<>, typename std::vector< typename UNetwork<> ::Edge >::const\\_iterator, typen](#)

### 9.123.3.8 learn()

```
template<typename Network = UNetwork<>, typename EdgeRndIt = typename std::vector<typename
Network::Edge>::const_iterator, typename ScoreRndIt = typename std::vector<double>::iterator,
typename EdgeRndOutIt = typename std::vector<typename Network::Edge>::iterator>
virtual void LinkPred::UHYPPredictor< Network, EdgeRndIt, ScoreRndIt, EdgeRndOutIt >::learn (
) [virtual]
```

Learning.

Implements [LinkPred::ULPredictor< UNetwork<>, typename std::vector< typename UNetwork<> ::Edge >::const\\_iterator, typen](#)

### 9.123.3.9 operator=() [1/2]

```
template<typename Network = UNetwork<>, typename EdgeRndIt = typename std::vector<typename
Network::Edge>::const_iterator, typename ScoreRndIt = typename std::vector<double>::iterator,
typename EdgeRndOutIt = typename std::vector<typename Network::Edge>::iterator>
UHYPPredictor& LinkPred::UHYPPredictor< Network, EdgeRndIt, ScoreRndIt, EdgeRndOutIt >::operator=
(
    UHYPPredictor< Network, EdgeRndIt, ScoreRndIt, EdgeRndOutIt > && that ) [delete]
```

Move assignment operator.

#### Parameters

|             |                     |
|-------------|---------------------|
| <i>that</i> | The object to move. |
|-------------|---------------------|

### 9.123.3.10 operator=() [2/2]

```
template<typename Network = UNetwork<>, typename EdgeRndIt = typename std::vector<typename
Network::Edge>::const_iterator, typename ScoreRndIt = typename std::vector<double>::iterator,
typename EdgeRndOutIt = typename std::vector<typename Network::Edge>::iterator>
UHYPPredictor& LinkPred::UHYPPredictor< Network, EdgeRndIt, ScoreRndIt, EdgeRndOutIt >::operator=
(
    UHYPPredictor< Network, EdgeRndIt, ScoreRndIt, EdgeRndOutIt > const & that )
[delete]
```

Copy assignment operator.

#### Parameters

|             |                     |
|-------------|---------------------|
| <i>that</i> | The object to copy. |
|-------------|---------------------|

**9.123.3.11 predict()**

```
template<typename Network = UNetwork<>, typename EdgeRndIt = typename std::vector<typename
Network::Edge>::const_iterator, typename ScoreRndIt = typename std::vector<double>::iterator,
typename EdgeRndOutIt = typename std::vector<typename Network::Edge>::iterator>
virtual void LinkPred::UHYPPredictor< Network, EdgeRndIt, ScoreRndIt, EdgeRndOutIt >::predict
(
    EdgeRndIt begin,
    EdgeRndIt end,
    ScoreRndIt scores ) [virtual]
```

Predict the links.

**Parameters**

|               |                                         |
|---------------|-----------------------------------------|
| <i>begin</i>  | Beginning of the links to be predicted. |
| <i>end</i>    | end of the links to be predicted.       |
| <i>scores</i> | Beginning of scores.                    |

Reimplemented from [LinkPred::ULPredictor< UNetwork<>, typename std::vector< typename UNetwork<> ::Edge >::const\\_iterator](#)

**9.123.3.12 score()**

```
template<typename Network = UNetwork<>, typename EdgeRndIt = typename std::vector<typename
Network::Edge>::const_iterator, typename ScoreRndIt = typename std::vector<double>::iterator,
typename EdgeRndOutIt = typename std::vector<typename Network::Edge>::iterator>
virtual double LinkPred::UHYPPredictor< Network, EdgeRndIt, ScoreRndIt, EdgeRndOutIt >::score
(
    Edge const & e ) [inline], [virtual]
```

Compute the score of a single edge.

**Parameters**

|          |           |
|----------|-----------|
| <i>e</i> | The edge. |
|----------|-----------|

**Returns**

The score of e.

**9.123.3.13 setGamma()**

```
template<typename Network = UNetwork<>, typename EdgeRndIt = typename std::vector<typename
Network::Edge>::const_iterator, typename ScoreRndIt = typename std::vector<double>::iterator,
typename EdgeRndOutIt = typename std::vector<typename Network::Edge>::iterator>
void LinkPred::UHYPPredictor< Network, EdgeRndIt, ScoreRndIt, EdgeRndOutIt >::setGamma (
    double gamma ) [inline]
```

Set the power law exponent gamma (see the algorithm description).

## Parameters

|              |                                                                   |
|--------------|-------------------------------------------------------------------|
| <i>gamma</i> | The new power law exponent gamma (see the algorithm description). |
|--------------|-------------------------------------------------------------------|

**9.123.3.14 setL()**

```
template<typename Network = UNetwork<>, typename EdgeRndIt = typename std::vector<typename
Network::Edge>::const_iterator, typename ScoreRndIt = typename std::vector<double>::iterator,
typename EdgeRndOutIt = typename std::vector<typename Network::Edge>::iterator>
void LinkPred::UHYPPredictor< Network, EdgeRndIt, ScoreRndIt, EdgeRndOutIt >::setL (
    double L ) [inline]
```

Set the parameter L (see the algorithm description).

## Parameters

|          |                                                                   |
|----------|-------------------------------------------------------------------|
| <i>L</i> | The new value of the parameter L (see the algorithm description). |
|----------|-------------------------------------------------------------------|

**9.123.3.15 setM()**

```
template<typename Network = UNetwork<>, typename EdgeRndIt = typename std::vector<typename
Network::Edge>::const_iterator, typename ScoreRndIt = typename std::vector<double>::iterator,
typename EdgeRndOutIt = typename std::vector<typename Network::Edge>::iterator>
void LinkPred::UHYPPredictor< Network, EdgeRndIt, ScoreRndIt, EdgeRndOutIt >::setM (
    double m ) [inline]
```

Set the parameter m (see the algorithm description).

## Parameters

|          |                                                                   |
|----------|-------------------------------------------------------------------|
| <i>m</i> | The new value of the parameter m (see the algorithm description). |
|----------|-------------------------------------------------------------------|

**9.123.3.16 setT()**

```
template<typename Network = UNetwork<>, typename EdgeRndIt = typename std::vector<typename
Network::Edge>::const_iterator, typename ScoreRndIt = typename std::vector<double>::iterator,
typename EdgeRndOutIt = typename std::vector<typename Network::Edge>::iterator>
void LinkPred::UHYPPredictor< Network, EdgeRndIt, ScoreRndIt, EdgeRndOutIt >::setT (
    double T ) [inline]
```

Set the parameter L (see the algorithm description).

## Parameters

|          |                                                                   |
|----------|-------------------------------------------------------------------|
| <i>T</i> | The new value of the parameter L (see the algorithm description). |
|----------|-------------------------------------------------------------------|

## 9.123.3.17 setZeta()

```
template<typename Network = UNetwork<>, typename EdgeRndIt = typename std::vector<typename
Network::Edge>::const_iterator, typename ScoreRndIt = typename std::vector<double>::iterator,
typename EdgeRndOutIt = typename std::vector<typename Network::Edge>::iterator>
void LinkPred::UHYPPredictor< Network, EdgeRndIt, ScoreRndIt, EdgeRndOutIt >::setZeta (
    double zeta ) [inline]
```

Set the parameter zeta (see the algorithm description).

## Parameters

|             |                                                                      |
|-------------|----------------------------------------------------------------------|
| <i>zeta</i> | The new value of the parameter zeta (see the algorithm description). |
|-------------|----------------------------------------------------------------------|

The documentation for this class was generated from the following file:

- [include/linkpred/predictors/undirected/uhypredictor.hpp](#)

## 9.124 LinkPred::UJIDPredictor< Network, EdgeRndIt, ScoreRndIt, EdgeRndOutIt > Class Template Reference

Jackard index link predictor.

```
#include <ujidpredictor.hpp>
```

Inheritance diagram for LinkPred::UJIDPredictor< Network, EdgeRndIt, ScoreRndIt, EdgeRndOutIt >:

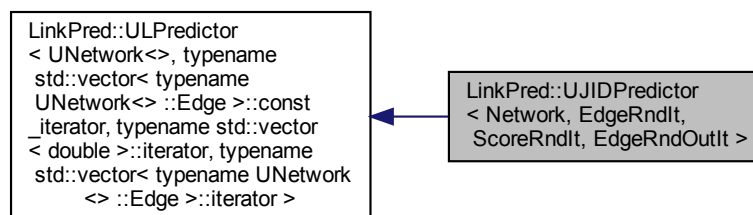

Collaboration diagram for LinkPred::UJIDPredictor< Network, EdgeRndIt, ScoreRndIt, EdgeRndOutIt >:

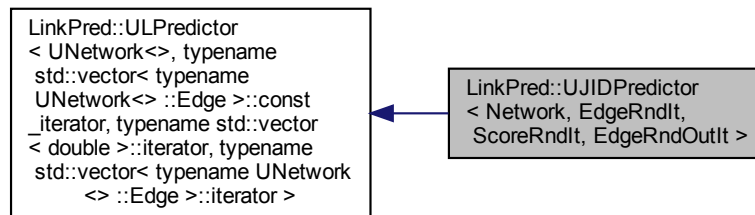

## Public Member Functions

- [UJIDPredictor](#) (std::shared\_ptr< [Network](#) const > net)
- [UJIDPredictor](#) ([UJIDPredictor](#) const &that)
- [UJIDPredictor](#) & operator= ([UJIDPredictor](#) const &that)
- [UJIDPredictor](#) ([UJIDPredictor](#) &&that)
- [UJIDPredictor](#) & operator= ([UJIDPredictor](#) &&that)
- virtual void [init](#) ()
- virtual void [learn](#) ()
- virtual double [score](#) (Edge const &e)
- virtual void [predict](#) ([EdgeRndIt](#) begin, [EdgeRndIt](#) end, [ScoreRndIt](#) scores)
- virtual std::size\_t [top](#) (std::size\_t k, [EdgeRndOutIt](#) eit, [ScoreRndIt](#) sit)
- virtual ~[UJIDPredictor](#) ()=default

## Additional Inherited Members

### 9.124.1 Detailed Description

```

template<typename Network = UNetwork<>, typename EdgeRndIt = typename std::vector<typename Network::Edge>::const_iterator,
typename ScoreRndIt = typename std::vector<double>::iterator, typename EdgeRndOutIt = typename std::vector<typename Network::Edge>::iterator>
class LinkPred::UJIDPredictor< Network, EdgeRndIt, ScoreRndIt, EdgeRndOutIt >

```

Jackard index link predictor.

#### Template Parameters

|                   |                                                   |
|-------------------|---------------------------------------------------|
| <i>Network</i>    | The network type.                                 |
| <i>EdgeRndIt</i>  | A random iterator type used to iterate on edges.  |
| <i>ScoreRndIt</i> | A random iterator type used to iterate on scores. |

## 9.124.2 Constructor & Destructor Documentation

### 9.124.2.1 UJIDPredictor() [1/3]

```
template<typename Network = UNetwork<>, typename EdgeRndIt = typename std::vector<typename
Network::Edge>::const_iterator, typename ScoreRndIt = typename std::vector<double>::iterator,
typename EdgeRndOutIt = typename std::vector<typename Network::Edge>::iterator>
LinkPred::UJIDPredictor< Network, EdgeRndIt, ScoreRndIt, EdgeRndOutIt >::UJIDPredictor (
    std::shared_ptr< Network const > net ) [inline]
```

#### Parameters

|            |              |
|------------|--------------|
| <i>net</i> | The network. |
|------------|--------------|

### 9.124.2.2 UJIDPredictor() [2/3]

```
template<typename Network = UNetwork<>, typename EdgeRndIt = typename std::vector<typename
Network::Edge>::const_iterator, typename ScoreRndIt = typename std::vector<double>::iterator,
typename EdgeRndOutIt = typename std::vector<typename Network::Edge>::iterator>
LinkPred::UJIDPredictor< Network, EdgeRndIt, ScoreRndIt, EdgeRndOutIt >::UJIDPredictor (
    UJIDPredictor< Network, EdgeRndIt, ScoreRndIt, EdgeRndOutIt > const & that )
```

Copy constructor.

#### Parameters

|             |                     |
|-------------|---------------------|
| <i>that</i> | The object to copy. |
|-------------|---------------------|

### 9.124.2.3 UJIDPredictor() [3/3]

```
template<typename Network = UNetwork<>, typename EdgeRndIt = typename std::vector<typename
Network::Edge>::const_iterator, typename ScoreRndIt = typename std::vector<double>::iterator,
typename EdgeRndOutIt = typename std::vector<typename Network::Edge>::iterator>
LinkPred::UJIDPredictor< Network, EdgeRndIt, ScoreRndIt, EdgeRndOutIt >::UJIDPredictor (
    UJIDPredictor< Network, EdgeRndIt, ScoreRndIt, EdgeRndOutIt > && that )
```

Move constructor.

#### Parameters

|             |                     |
|-------------|---------------------|
| <i>that</i> | The object to move. |
|-------------|---------------------|

#### 9.124.2.4 ~UJIDPredictor()

```
template<typename Network = UNetwork<>, typename EdgeRndIt = typename std::vector<typename
Network::Edge>::const_iterator, typename ScoreRndIt = typename std::vector<double>::iterator,
typename EdgeRndOutIt = typename std::vector<typename Network::Edge>::iterator>
virtual LinkPred::UJIDPredictor< Network, EdgeRndIt, ScoreRndIt, EdgeRndOutIt >::~UJIDPredictor
( ) [virtual], [default]
```

Destructor.

### 9.124.3 Member Function Documentation

#### 9.124.3.1 init()

```
template<typename Network = UNetwork<>, typename EdgeRndIt = typename std::vector<typename
Network::Edge>::const_iterator, typename ScoreRndIt = typename std::vector<double>::iterator,
typename EdgeRndOutIt = typename std::vector<typename Network::Edge>::iterator>
virtual void LinkPred::UJIDPredictor< Network, EdgeRndIt, ScoreRndIt, EdgeRndOutIt >::init ( )
[inline], [virtual]
```

Initialize the solver.

Implements [LinkPred::ULPredictor< UNetwork<>, typename std::vector< typename UNetwork<> ::Edge >::const\\_iterator, typen](#)

#### 9.124.3.2 learn()

```
template<typename Network = UNetwork<>, typename EdgeRndIt = typename std::vector<typename
Network::Edge>::const_iterator, typename ScoreRndIt = typename std::vector<double>::iterator,
typename EdgeRndOutIt = typename std::vector<typename Network::Edge>::iterator>
virtual void LinkPred::UJIDPredictor< Network, EdgeRndIt, ScoreRndIt, EdgeRndOutIt >::learn (
) [inline], [virtual]
```

Learning.

Implements [LinkPred::ULPredictor< UNetwork<>, typename std::vector< typename UNetwork<> ::Edge >::const\\_iterator, typen](#)

#### 9.124.3.3 operator=() [1/2]

```
template<typename Network = UNetwork<>, typename EdgeRndIt = typename std::vector<typename
Network::Edge>::const_iterator, typename ScoreRndIt = typename std::vector<double>::iterator,
typename EdgeRndOutIt = typename std::vector<typename Network::Edge>::iterator>
UJIDPredictor& LinkPred::UJIDPredictor< Network, EdgeRndIt, ScoreRndIt, EdgeRndOutIt >::operator=
(
    UJIDPredictor< Network, EdgeRndIt, ScoreRndIt, EdgeRndOutIt > && that )
```

Move assignment operator.



## Parameters

|             |                     |
|-------------|---------------------|
| <i>that</i> | The object to move. |
|-------------|---------------------|

## 9.124.3.4 operator=() [2/2]

```
template<typename Network = UNetwork<>, typename EdgeRndIt = typename std::vector<typename
Network::Edge>::const_iterator, typename ScoreRndIt = typename std::vector<double>::iterator,
typename EdgeRndOutIt = typename std::vector<typename Network::Edge>::iterator>
UJIDPredictor& LinkPred::UJIDPredictor< Network, EdgeRndIt, ScoreRndIt, EdgeRndOutIt >::operator=
(
    UJIDPredictor< Network, EdgeRndIt, ScoreRndIt, EdgeRndOutIt > const & that )
```

Copy assignment operator.

## Parameters

|             |                     |
|-------------|---------------------|
| <i>that</i> | The object to copy. |
|-------------|---------------------|

## 9.124.3.5 predict()

```
template<typename Network = UNetwork<>, typename EdgeRndIt = typename std::vector<typename
Network::Edge>::const_iterator, typename ScoreRndIt = typename std::vector<double>::iterator,
typename EdgeRndOutIt = typename std::vector<typename Network::Edge>::iterator>
virtual void LinkPred::UJIDPredictor< Network, EdgeRndIt, ScoreRndIt, EdgeRndOutIt >::predict
(
    EdgeRndIt begin,
    EdgeRndIt end,
    ScoreRndIt scores ) [virtual]
```

Predict the links.

## Parameters

|               |                                         |
|---------------|-----------------------------------------|
| <i>begin</i>  | Beginning of the links to be predicted. |
| <i>end</i>    | end of the links to be predicted.       |
| <i>scores</i> | Beginning of scores.                    |

Reimplemented from [LinkPred::ULPredictor< UNetwork<>, typename std::vector< typename UNetwork<> ::Edge >::const\\_iterator](#)

## 9.124.3.6 score()

```
template<typename Network = UNetwork<>, typename EdgeRndIt = typename std::vector<typename
Network::Edge>::const_iterator, typename ScoreRndIt = typename std::vector<double>::iterator,
```

```

typename EdgeRndOutIt = typename std::vector<typename Network::Edge>::iterator>
virtual double LinkPred::UJIDPredictor< Network, EdgeRndIt, ScoreRndIt, EdgeRndOutIt >::score
(
    Edge const & e ) [inline], [virtual]

```

Compute the score of a single edge.

#### Parameters

|          |           |
|----------|-----------|
| <i>e</i> | The edge. |
|----------|-----------|

#### Returns

The score of *e*.

### 9.124.3.7 top()

```

template<typename Network = UNetwork<>, typename EdgeRndIt = typename std::vector<typename
Network::Edge>::const_iterator, typename ScoreRndIt = typename std::vector<double>::iterator,
typename EdgeRndOutIt = typename std::vector<typename Network::Edge>::iterator>
virtual std::size_t LinkPred::UJIDPredictor< Network, EdgeRndIt, ScoreRndIt, EdgeRndOutIt >↔
::top (
    std::size_t k,
    EdgeRndOutIt eit,
    ScoreRndIt sit ) [virtual]

```

Finds the *k* negative edges with the top score. Ties are broken randomly.

#### Parameters

|            |                                                                                                         |
|------------|---------------------------------------------------------------------------------------------------------|
| <i>k</i>   | The number of edges to find.                                                                            |
| <i>eit</i> | An output iterator where the edges are written.                                                         |
| <i>sit</i> | An output iterator where the scores are written. The scores are written in the same order as the edges. |

#### Returns

The number of negative edges inserted. It is the minimum between *k* and the number of negative edges in the network.

Reimplemented from [LinkPred::ULPredictor< UNetwork<>, typename std::vector< typename UNetwork<> ::Edge >::const\\_iterator>](#)

The documentation for this class was generated from the following file:

- [include/linkpred/predictors/undirected/ujidpredictor.hpp](#)

## 9.125 LinkPred::UKABPredictor< Network, EdgeRndIt, ScoreRndIt, EdgeRndOutIt > Class Template Reference

A scalable popularity similarity link predictor proposed in: "Kerrache, S., Alharbi, R. & Benhidour, H. A Scalable Similarity-Popularity Link Prediction Method. Sci Rep 10, 6394 (2020)". <https://doi.org/10.1038/s41598-020-62636-1>.

```
#include <ukabpredictor.hpp>
```

Inheritance diagram for LinkPred::UKABPredictor< Network, EdgeRndIt, ScoreRndIt, EdgeRndOutIt >:

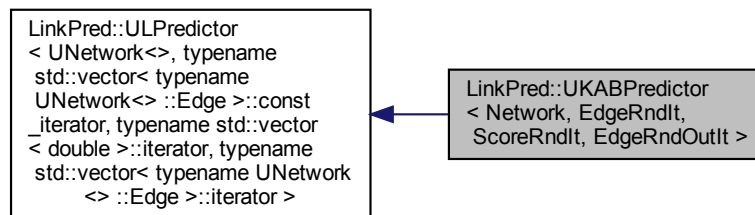

Collaboration diagram for LinkPred::UKABPredictor< Network, EdgeRndIt, ScoreRndIt, EdgeRndOutIt >:

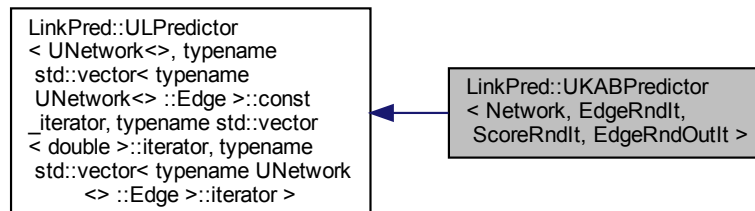

### Public Types

- using `NodeID` = `typename ULPredictor< Network, EdgeRndIt, ScoreRndIt, EdgeRndOutIt >::NodeID`
- using `Edge` = `typename ULPredictor< Network, EdgeRndIt, ScoreRndIt, EdgeRndOutIt >::Edge`

### Public Member Functions

- `UKABPredictor` (`std::shared_ptr< Network const > net`)
- `UKABPredictor` (`UKABPredictor const &that`)=default
- `UKABPredictor & operator=` (`UKABPredictor const &that`)=default
- `UKABPredictor` (`UKABPredictor &&that`)=default
- `UKABPredictor & operator=` (`UKABPredictor &&that`)=default

- virtual void `init` ()
- virtual void `learn` ()
- virtual double `score` (`Edge` const &`e`)
- virtual void `predict` (`EdgeRndIt` begin, `EdgeRndIt` end, `ScoreRndIt` scores)
- virtual std::size\_t `top` (std::size\_t `k`, `EdgeRndOutIt` eit, `ScoreRndIt` sit)
- `CacheLevel` `getCacheLevel` () const
- void `setCacheLevel` (`CacheLevel` cacheLevel)
- std::size\_t `getHorizLim` () const
- void `setHorizLim` (std::size\_t horizLim)
- virtual `~UKABPredictor` ()=default

### 9.125.1 Detailed Description

```
template<typename Network = UNetwork<>, typename EdgeRndIt = typename std::vector<typename Network::Edge>::const_iterator,
typename ScoreRndIt = typename std::vector<double>::iterator, typename EdgeRndOutIt = typename std::vector<typename Network::Edge>::iterator>
class LinkPred::UKABPredictor< Network, EdgeRndIt, ScoreRndIt, EdgeRndOutIt >
```

A scalable popularity similarity link predictor proposed in: "Kerrache, S., Alharbi, R. & Benhidour, H. A Scalable Similarity-Popularity Link Prediction Method. Sci Rep 10, 6394 (2020)". <https://doi.org/10.1038/s41598-020-62636-1>.

#### Template Parameters

|                   |                                                   |
|-------------------|---------------------------------------------------|
| <i>Network</i>    | The network type.                                 |
| <i>EdgeRndIt</i>  | A random iterator type used to iterate on edges.  |
| <i>ScoreRndIt</i> | A random iterator type used to iterate on scores. |

### 9.125.2 Member Typedef Documentation

#### 9.125.2.1 Edge

```
template<typename Network = UNetwork<>, typename EdgeRndIt = typename std::vector<typename Network::Edge>::const_iterator,
typename ScoreRndIt = typename std::vector<double>::iterator,
typename EdgeRndOutIt = typename std::vector<typename Network::Edge>::iterator>
using LinkPred::UKABPredictor< Network, EdgeRndIt, ScoreRndIt, EdgeRndOutIt >::Edge = typename ULPredictor<Network, EdgeRndIt, ScoreRndIt, EdgeRndOutIt>::Edge
```

The edges type.

#### 9.125.2.2 NodeID

```
template<typename Network = UNetwork<>, typename EdgeRndIt = typename std::vector<typename Network::Edge>::const_iterator,
typename ScoreRndIt = typename std::vector<double>::iterator,
typename EdgeRndOutIt = typename std::vector<typename Network::Edge>::iterator>
using LinkPred::UKABPredictor< Network, EdgeRndIt, ScoreRndIt, EdgeRndOutIt >::NodeID = typename ULPredictor<Network, EdgeRndIt, ScoreRndIt, EdgeRndOutIt>::NodeID
```

The node IDs type.

## 9.125.3 Constructor & Destructor Documentation

### 9.125.3.1 UKABPredictor() [1/3]

```
template<typename Network = UNetwork<>, typename EdgeRndIt = typename std::vector<typename
Network::Edge>::const_iterator, typename ScoreRndIt = typename std::vector<double>::iterator,
typename EdgeRndOutIt = typename std::vector<typename Network::Edge>::iterator>
LinkPred::UKABPredictor< Network, EdgeRndIt, ScoreRndIt, EdgeRndOutIt >::UKABPredictor (
    std::shared_ptr< Network const > net ) [inline]
```

#### Parameters

|            |              |
|------------|--------------|
| <i>net</i> | The network. |
|------------|--------------|

### 9.125.3.2 UKABPredictor() [2/3]

```
template<typename Network = UNetwork<>, typename EdgeRndIt = typename std::vector<typename
Network::Edge>::const_iterator, typename ScoreRndIt = typename std::vector<double>::iterator,
typename EdgeRndOutIt = typename std::vector<typename Network::Edge>::iterator>
LinkPred::UKABPredictor< Network, EdgeRndIt, ScoreRndIt, EdgeRndOutIt >::UKABPredictor (
    UKABPredictor< Network, EdgeRndIt, ScoreRndIt, EdgeRndOutIt > const & that )
[default]
```

Copy constructor.

#### Parameters

|             |                     |
|-------------|---------------------|
| <i>that</i> | The object to copy. |
|-------------|---------------------|

### 9.125.3.3 UKABPredictor() [3/3]

```
template<typename Network = UNetwork<>, typename EdgeRndIt = typename std::vector<typename
Network::Edge>::const_iterator, typename ScoreRndIt = typename std::vector<double>::iterator,
typename EdgeRndOutIt = typename std::vector<typename Network::Edge>::iterator>
LinkPred::UKABPredictor< Network, EdgeRndIt, ScoreRndIt, EdgeRndOutIt >::UKABPredictor (
    UKABPredictor< Network, EdgeRndIt, ScoreRndIt, EdgeRndOutIt > && that ) [default]
```

Move constructor.

#### Parameters

|             |                     |
|-------------|---------------------|
| <i>that</i> | The object to move. |
|-------------|---------------------|

### 9.125.3.4 ~UKABPredictor()

```
template<typename Network = UNetwork<>, typename EdgeRndIt = typename std::vector<typename
Network::Edge>::const_iterator, typename ScoreRndIt = typename std::vector<double>::iterator,
typename EdgeRndOutIt = typename std::vector<typename Network::Edge>::iterator>
virtual LinkPred::UKABPredictor< Network, EdgeRndIt, ScoreRndIt, EdgeRndOutIt >::~UKABPredictor
( ) [virtual], [default]
```

Destructor.

## 9.125.4 Member Function Documentation

### 9.125.4.1 getCacheLevel()

```
template<typename Network = UNetwork<>, typename EdgeRndIt = typename std::vector<typename
Network::Edge>::const_iterator, typename ScoreRndIt = typename std::vector<double>::iterator,
typename EdgeRndOutIt = typename std::vector<typename Network::Edge>::iterator>
CacheLevel LinkPred::UKABPredictor< Network, EdgeRndIt, ScoreRndIt, EdgeRndOutIt >::getCache↵
Level ( ) const [inline]
```

#### Returns

The distances cache level.

### 9.125.4.2 getHorizLim()

```
template<typename Network = UNetwork<>, typename EdgeRndIt = typename std::vector<typename
Network::Edge>::const_iterator, typename ScoreRndIt = typename std::vector<double>::iterator,
typename EdgeRndOutIt = typename std::vector<typename Network::Edge>::iterator>
std::size_t LinkPred::UKABPredictor< Network, EdgeRndIt, ScoreRndIt, EdgeRndOutIt >::get↵
HorizLim ( ) const [inline]
```

#### Returns

The horizon limit.

### 9.125.4.3 init()

```
template<typename Network = UNetwork<>, typename EdgeRndIt = typename std::vector<typename
Network::Edge>::const_iterator, typename ScoreRndIt = typename std::vector<double>::iterator,
typename EdgeRndOutIt = typename std::vector<typename Network::Edge>::iterator>
virtual void LinkPred::UKABPredictor< Network, EdgeRndIt, ScoreRndIt, EdgeRndOutIt >::init ( )
[virtual]
```

Initialize the predictor.

Implements [LinkPred::ULPredictor< UNetwork<>, typename std::vector< typename UNetwork<> ::Edge >::const\\_iterator, typen](#)

### 9.125.4.4 learn()

```
template<typename Network = UNetwork<>, typename EdgeRndIt = typename std::vector<typename
Network::Edge>::const_iterator, typename ScoreRndIt = typename std::vector<double>::iterator,
typename EdgeRndOutIt = typename std::vector<typename Network::Edge>::iterator>
virtual void LinkPred::UKABPredictor< Network, EdgeRndIt, ScoreRndIt, EdgeRndOutIt >::learn (
) [virtual]
```

Learn.

Implements [LinkPred::ULPredictor< UNetwork<>, typename std::vector< typename UNetwork<> ::Edge >::const\\_iterator, typen](#)

### 9.125.4.5 operator=() [1/2]

```
template<typename Network = UNetwork<>, typename EdgeRndIt = typename std::vector<typename
Network::Edge>::const_iterator, typename ScoreRndIt = typename std::vector<double>::iterator,
typename EdgeRndOutIt = typename std::vector<typename Network::Edge>::iterator>
UKABPredictor& LinkPred::UKABPredictor< Network, EdgeRndIt, ScoreRndIt, EdgeRndOutIt >::operator=
(
    UKABPredictor< Network, EdgeRndIt, ScoreRndIt, EdgeRndOutIt > && that ) [default]
```

Move assignment operator.

#### Parameters

|             |                     |
|-------------|---------------------|
| <i>that</i> | The object to move. |
|-------------|---------------------|

### 9.125.4.6 operator=() [2/2]

```
template<typename Network = UNetwork<>, typename EdgeRndIt = typename std::vector<typename
Network::Edge>::const_iterator, typename ScoreRndIt = typename std::vector<double>::iterator,
typename EdgeRndOutIt = typename std::vector<typename Network::Edge>::iterator>
```

```

UKABPredictor& LinkPred::UKABPredictor< Network, EdgeRndIt, ScoreRndIt, EdgeRndOutIt >::operator=
(
    UKABPredictor< Network, EdgeRndIt, ScoreRndIt, EdgeRndOutIt > const & that )
[default]

```

Copy assignment operator.

#### Parameters

|             |                     |
|-------------|---------------------|
| <i>that</i> | The object to copy. |
|-------------|---------------------|

#### 9.125.4.7 predict()

```

template<typename Network = UNetwork<>, typename EdgeRndIt = typename std::vector<typename
Network::Edge>::const_iterator, typename ScoreRndIt = typename std::vector<double>::iterator,
typename EdgeRndOutIt = typename std::vector<typename Network::Edge>::iterator>
virtual void LinkPred::UKABPredictor< Network, EdgeRndIt, ScoreRndIt, EdgeRndOutIt >::predict
(
    EdgeRndIt begin,
    EdgeRndIt end,
    ScoreRndIt scores ) [virtual]

```

Predict the links.

#### Parameters

|               |                                         |
|---------------|-----------------------------------------|
| <i>begin</i>  | Beginning of the links to be predicted. |
| <i>end</i>    | end of the links to be predicted.       |
| <i>scores</i> | Beginning of scores.                    |

Reimplemented from [LinkPred::ULPredictor< UNetwork<>, typename std::vector< typename UNetwork<> ::Edge >::const\\_iterator](#)

#### 9.125.4.8 score()

```

template<typename Network = UNetwork<>, typename EdgeRndIt = typename std::vector<typename
Network::Edge>::const_iterator, typename ScoreRndIt = typename std::vector<double>::iterator,
typename EdgeRndOutIt = typename std::vector<typename Network::Edge>::iterator>
virtual double LinkPred::UKABPredictor< Network, EdgeRndIt, ScoreRndIt, EdgeRndOutIt >::score
(
    Edge const & e ) [virtual]

```

Compute the score of a single edge.

#### Parameters

|          |           |
|----------|-----------|
| <i>e</i> | The edge. |
|----------|-----------|



## Returns

The score of e.

## 9.125.4.9 setCacheLevel()

```
template<typename Network = UNetwork<>, typename EdgeRndIt = typename std::vector<typename
Network::Edge>::const_iterator, typename ScoreRndIt = typename std::vector<double>::iterator,
typename EdgeRndOutIt = typename std::vector<typename Network::Edge>::iterator>
void LinkPred::UKABPredictor< Network, EdgeRndIt, ScoreRndIt, EdgeRndOutIt >::setCacheLevel (
    CacheLevel cacheLevel ) [inline]
```

Set the distances cache level.

## Parameters

|                   |                                |
|-------------------|--------------------------------|
| <i>cacheLevel</i> | The new distances cache level. |
|-------------------|--------------------------------|

## 9.125.4.10 setHorizLim()

```
template<typename Network = UNetwork<>, typename EdgeRndIt = typename std::vector<typename
Network::Edge>::const_iterator, typename ScoreRndIt = typename std::vector<double>::iterator,
typename EdgeRndOutIt = typename std::vector<typename Network::Edge>::iterator>
void LinkPred::UKABPredictor< Network, EdgeRndIt, ScoreRndIt, EdgeRndOutIt >::setHorizLim (
    std::size_t horizLim ) [inline]
```

## Parameters

|                 |                    |
|-----------------|--------------------|
| <i>horizLim</i> | New horizon limit. |
|-----------------|--------------------|

## 9.125.4.11 top()

```
template<typename Network = UNetwork<>, typename EdgeRndIt = typename std::vector<typename
Network::Edge>::const_iterator, typename ScoreRndIt = typename std::vector<double>::iterator,
typename EdgeRndOutIt = typename std::vector<typename Network::Edge>::iterator>
virtual std::size_t LinkPred::UKABPredictor< Network, EdgeRndIt, ScoreRndIt, EdgeRndOutIt >↔
::top (
    std::size_t k,
    EdgeRndOutIt eit,
    ScoreRndIt sit ) [virtual]
```

Finds the k negative edges with the top score. Ties are broken randomly.

## Parameters

|            |                                                                                                         |
|------------|---------------------------------------------------------------------------------------------------------|
| <i>k</i>   | The number of edges to find.                                                                            |
| <i>eit</i> | An output iterator where the edges are written.                                                         |
| <i>sit</i> | An output iterator where the scores are written. The scores are written in the same order as the edges. |

## Returns

The number of negative edges inserted. It is the minimum between *k* and the number of negative edges in the network.

Reimplemented from [LinkPred::ULPredictor< UNetwork<>, typename std::vector< typename UNetwork<> ::Edge >::const\\_iterator](#)

The documentation for this class was generated from the following file:

- [include/linkpred/predictors/undirected/ukabpredictor.hpp](#)

## 9.126 LinkPred::ULCPPredictor< Network, EdgeRndIt, ScoreRndIt, EdgeRndOutIt > Class Template Reference

Local path link predictor.

```
#include <ulcppredictor.hpp>
```

Inheritance diagram for LinkPred::ULCPPredictor< Network, EdgeRndIt, ScoreRndIt, EdgeRndOutIt >:

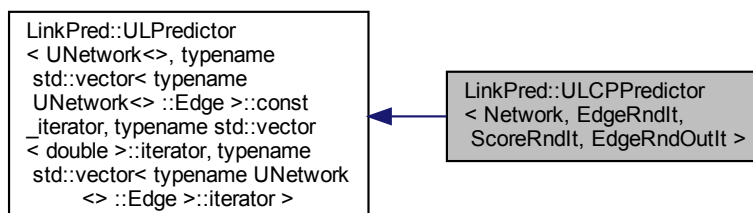

Collaboration diagram for LinkPred::ULCPPredictor< Network, EdgeRndIt, ScoreRndIt, EdgeRndOutIt >:

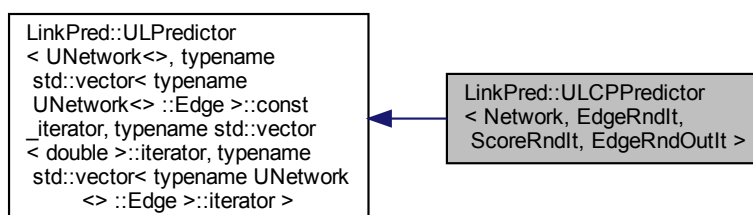

## Public Member Functions

- [ULCPPredictor](#) (std::shared\_ptr< [Network](#) const > net)
- [ULCPPredictor](#) ([ULCPPredictor](#) const &that)=default
- [ULCPPredictor](#) & [operator=](#) ([ULCPPredictor](#) const &that)=default
- [ULCPPredictor](#) ([ULCPPredictor](#) &&that)=default
- [ULCPPredictor](#) & [operator=](#) ([ULCPPredictor](#) &&that)=default
- virtual void [init](#) ()
- virtual void [learn](#) ()
- virtual void [predict](#) ([EdgeRndIt](#) begin, [EdgeRndIt](#) end, [ScoreRndIt](#) scores)
- virtual double [score](#) ([Edge](#) const &e)
- double [getEpsilon](#) () const
- void [setEpsilon](#) (double epsilon)
- virtual [~ULCPPredictor](#) ()=default

## Additional Inherited Members

### 9.126.1 Detailed Description

```
template<typename Network = UNetwork<>, typename EdgeRndIt = typename std::vector<typename Network::Edge>::const_iterator,
typename ScoreRndIt = typename std::vector<double>::iterator, typename EdgeRndOutIt = typename std::vector<typename Network::Edge>::iterator>
class LinkPred::ULCPPredictor< Network, EdgeRndIt, ScoreRndIt, EdgeRndOutIt >
```

Local path link predictor.

#### Template Parameters

|                   |                                                   |
|-------------------|---------------------------------------------------|
| <i>Network</i>    | The network type.                                 |
| <i>EdgeRndIt</i>  | A random iterator type used to iterate on edges.  |
| <i>ScoreRndIt</i> | A random iterator type used to iterate on scores. |

### 9.126.2 Constructor & Destructor Documentation

#### 9.126.2.1 ULCPPredictor() [1/3]

```
template<typename Network = UNetwork<>, typename EdgeRndIt = typename std::vector<typename
Network::Edge>::const_iterator, typename ScoreRndIt = typename std::vector<double>::iterator,
typename EdgeRndOutIt = typename std::vector<typename Network::Edge>::iterator>
LinkPred::ULCPPredictor< Network, EdgeRndIt, ScoreRndIt, EdgeRndOutIt >::ULCPPredictor (
    std::shared_ptr< Network const > net ) [inline]
```

#### Parameters

|            |              |
|------------|--------------|
| <i>net</i> | The network. |
|------------|--------------|

### 9.126.2.2 ULCPredictor() [2/3]

```
template<typename Network = UNetwork<>, typename EdgeRndIt = typename std::vector<typename
Network::Edge>::const_iterator, typename ScoreRndIt = typename std::vector<double>::iterator,
typename EdgeRndOutIt = typename std::vector<typename Network::Edge>::iterator>
LinkPred::ULCPredictor< Network, EdgeRndIt, ScoreRndIt, EdgeRndOutIt >::ULCPredictor (
    ULCPredictor< Network, EdgeRndIt, ScoreRndIt, EdgeRndOutIt > const & that )
[default]
```

Copy constructor.

#### Parameters

|             |                     |
|-------------|---------------------|
| <i>that</i> | The object to copy. |
|-------------|---------------------|

### 9.126.2.3 ULCPredictor() [3/3]

```
template<typename Network = UNetwork<>, typename EdgeRndIt = typename std::vector<typename
Network::Edge>::const_iterator, typename ScoreRndIt = typename std::vector<double>::iterator,
typename EdgeRndOutIt = typename std::vector<typename Network::Edge>::iterator>
LinkPred::ULCPredictor< Network, EdgeRndIt, ScoreRndIt, EdgeRndOutIt >::ULCPredictor (
    ULCPredictor< Network, EdgeRndIt, ScoreRndIt, EdgeRndOutIt > && that ) [default]
```

Move constructor.

#### Parameters

|             |                     |
|-------------|---------------------|
| <i>that</i> | The object to move. |
|-------------|---------------------|

### 9.126.2.4 ~ULCPredictor()

```
template<typename Network = UNetwork<>, typename EdgeRndIt = typename std::vector<typename
Network::Edge>::const_iterator, typename ScoreRndIt = typename std::vector<double>::iterator,
typename EdgeRndOutIt = typename std::vector<typename Network::Edge>::iterator>
virtual LinkPred::ULCPredictor< Network, EdgeRndIt, ScoreRndIt, EdgeRndOutIt >::~~ULCPredictor
( ) [virtual], [default]
```

Destructor.

## 9.126.3 Member Function Documentation

### 9.126.3.1 getEpsilon()

```
template<typename Network = UNetwork<>, typename EdgeRndIt = typename std::vector<typename
Network::Edge>::const_iterator, typename ScoreRndIt = typename std::vector<double>::iterator,
typename EdgeRndOutIt = typename std::vector<typename Network::Edge>::iterator>
double LinkPred::ULCPPredictor< Network, EdgeRndIt, ScoreRndIt, EdgeRndOutIt >::getEpsilon ( )
const [inline]
```

#### Returns

epsilon, the weight of paths of length 3.

### 9.126.3.2 init()

```
template<typename Network = UNetwork<>, typename EdgeRndIt = typename std::vector<typename
Network::Edge>::const_iterator, typename ScoreRndIt = typename std::vector<double>::iterator,
typename EdgeRndOutIt = typename std::vector<typename Network::Edge>::iterator>
virtual void LinkPred::ULCPPredictor< Network, EdgeRndIt, ScoreRndIt, EdgeRndOutIt >::init ( )
[inline], [virtual]
```

Initialize the predictor.

Implements [LinkPred::ULPredictor< UNetwork<>, typename std::vector< typename UNetwork<> ::Edge >::const\\_iterator, typena](#)

### 9.126.3.3 learn()

```
template<typename Network = UNetwork<>, typename EdgeRndIt = typename std::vector<typename
Network::Edge>::const_iterator, typename ScoreRndIt = typename std::vector<double>::iterator,
typename EdgeRndOutIt = typename std::vector<typename Network::Edge>::iterator>
virtual void LinkPred::ULCPPredictor< Network, EdgeRndIt, ScoreRndIt, EdgeRndOutIt >::learn (
) [inline], [virtual]
```

Learn.

Implements [LinkPred::ULPredictor< UNetwork<>, typename std::vector< typename UNetwork<> ::Edge >::const\\_iterator, typena](#)

### 9.126.3.4 operator=() [1/2]

```
template<typename Network = UNetwork<>, typename EdgeRndIt = typename std::vector<typename
Network::Edge>::const_iterator, typename ScoreRndIt = typename std::vector<double>::iterator,
typename EdgeRndOutIt = typename std::vector<typename Network::Edge>::iterator>
ULCPPredictor& LinkPred::ULCPPredictor< Network, EdgeRndIt, ScoreRndIt, EdgeRndOutIt >::operator=
(
    ULCPPredictor< Network, EdgeRndIt, ScoreRndIt, EdgeRndOutIt > && that ) [default]
```

Move assignment operator.

## Parameters

|             |                     |
|-------------|---------------------|
| <i>that</i> | The object to move. |
|-------------|---------------------|

**9.126.3.5 operator=()** [2/2]

```
template<typename Network = UNetwork<>, typename EdgeRndIt = typename std::vector<typename
Network::Edge>::const_iterator, typename ScoreRndIt = typename std::vector<double>::iterator,
typename EdgeRndOutIt = typename std::vector<typename Network::Edge>::iterator>
ULCPPredictor& LinkPred::ULCPPredictor< Network, EdgeRndIt, ScoreRndIt, EdgeRndOutIt >::operator=
(
    ULCPPredictor< Network, EdgeRndIt, ScoreRndIt, EdgeRndOutIt > const & that )
[default]
```

Copy assignment operator.

## Parameters

|             |                     |
|-------------|---------------------|
| <i>that</i> | The object to copy. |
|-------------|---------------------|

**9.126.3.6 predict()**

```
template<typename Network = UNetwork<>, typename EdgeRndIt = typename std::vector<typename
Network::Edge>::const_iterator, typename ScoreRndIt = typename std::vector<double>::iterator,
typename EdgeRndOutIt = typename std::vector<typename Network::Edge>::iterator>
virtual void LinkPred::ULCPPredictor< Network, EdgeRndIt, ScoreRndIt, EdgeRndOutIt >::predict
(
    EdgeRndIt begin,
    EdgeRndIt end,
    ScoreRndIt scores ) [virtual]
```

Predict the links.

## Parameters

|               |                                         |
|---------------|-----------------------------------------|
| <i>begin</i>  | Beginning of the links to be predicted. |
| <i>end</i>    | end of the links to be predicted.       |
| <i>scores</i> | Beginning of scores.                    |

Reimplemented from [LinkPred::ULPredictor< UNetwork<>, typename std::vector< typename UNetwork<> ::Edge >::const\\_iterator](#)

**9.126.3.7 score()**

```
template<typename Network = UNetwork<>, typename EdgeRndIt = typename std::vector<typename
Network::Edge>::const_iterator, typename ScoreRndIt = typename std::vector<double>::iterator,
```

```

typename EdgeRndOutIt = typename std::vector<typename Network::Edge>::iterator>
virtual double LinkPred::ULCPPredictor< Network, EdgeRndIt, ScoreRndIt, EdgeRndOutIt >::score
(
    Edge const & e ) [virtual]

```

Compute the score of a single edge.

#### Parameters

|          |           |
|----------|-----------|
| <i>e</i> | The edge. |
|----------|-----------|

#### Returns

The score of *e*.

### 9.126.3.8 setEpsilon()

```

template<typename Network = UNetwork<>, typename EdgeRndIt = typename std::vector<typename
Network::Edge>::const_iterator, typename ScoreRndIt = typename std::vector<double>::iterator,
typename EdgeRndOutIt = typename std::vector<typename Network::Edge>::iterator>
void LinkPred::ULCPPredictor< Network, EdgeRndIt, ScoreRndIt, EdgeRndOutIt >::setEpsilon (
    double epsilon ) [inline]

```

Set epsilon, the weight of paths of length 3.

#### Parameters

|                |                                      |
|----------------|--------------------------------------|
| <i>epsilon</i> | The new weight of paths of length 3. |
|----------------|--------------------------------------|

The documentation for this class was generated from the following file:

- include/linkpred/predictors/undirected/[ulcppredictor.hpp](#)

## 9.127 LinkPred::ULHNPredictor< Network, EdgeRndIt, ScoreRndIt, EdgeRndOutIt > Class Template Reference

Leicht-Holme-Newman index link predictor.

```
#include <ulhnpredictor.hpp>
```

Inheritance diagram for LinkPred::ULHNPredictor< Network, EdgeRndIt, ScoreRndIt, EdgeRndOutIt >:

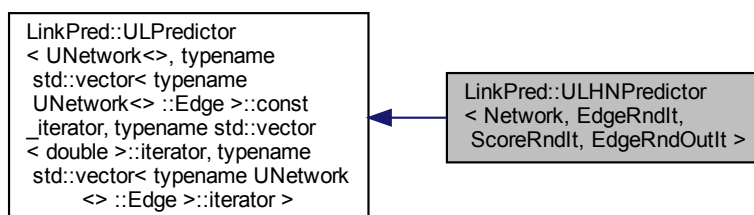

Collaboration diagram for LinkPred::ULHNPredictor< Network, EdgeRndIt, ScoreRndIt, EdgeRndOutIt >:

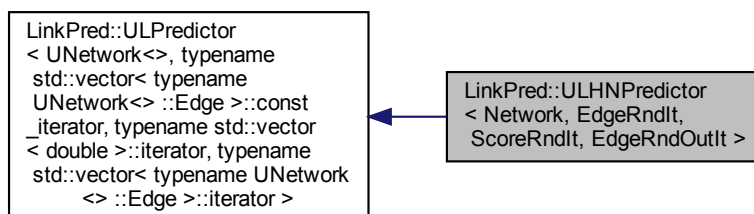

## Public Member Functions

- [ULHNPredictor](#) (std::shared\_ptr< [Network](#) const > net)
- [ULHNPredictor](#) ([ULHNPredictor](#) const &that)=default
- [ULHNPredictor](#) & operator= ([ULHNPredictor](#) const &that)=default
- [ULHNPredictor](#) ([ULHNPredictor](#) &&that)=default
- [ULHNPredictor](#) & operator= ([ULHNPredictor](#) &&that)=default
- virtual void [init](#) ()
- virtual void [learn](#) ()
- virtual double [score](#) (Edge const &e)
- virtual void [predict](#) ([EdgeRndIt](#) begin, [EdgeRndIt](#) end, [ScoreRndIt](#) scores)
- virtual std::size\_t [top](#) (std::size\_t k, [EdgeRndOutIt](#) eit, [ScoreRndIt](#) sit)
- virtual ~[ULHNPredictor](#) ()=default

## Additional Inherited Members

### 9.127.1 Detailed Description

```

template<typename Network = UNetwork<>, typename EdgeRndIt = typename std::vector<typename Network::Edge>::const_iterator,
        typename ScoreRndIt = typename std::vector<double>::iterator, typename EdgeRndOutIt = typename std::vector<typename Network::Edge>::iterator>
class LinkPred::ULHNPredictor< Network, EdgeRndIt, ScoreRndIt, EdgeRndOutIt >
  
```

Leicht-Holme-Newman index link predictor.



## Template Parameters

|                         |                                                   |
|-------------------------|---------------------------------------------------|
| <i>Network</i>          | The network type.                                 |
| <i>Edge↔<br/>RndIt</i>  | A random iterator type used to iterate on edges.  |
| <i>Score↔<br/>RndIt</i> | A random iterator type used to iterate on scores. |

## 9.127.2 Constructor &amp; Destructor Documentation

## 9.127.2.1 ULHNPredictor() [1/3]

```
template<typename Network = UNetwork<>, typename EdgeRndIt = typename std::vector<typename
Network::Edge>::const_iterator, typename ScoreRndIt = typename std::vector<double>::iterator,
typename EdgeRndOutIt = typename std::vector<typename Network::Edge>::iterator>
LinkPred::ULHNPredictor< Network, EdgeRndIt, ScoreRndIt, EdgeRndOutIt >::ULHNPredictor (
    std::shared_ptr< Network const > net ) [inline]
```

## Parameters

|            |              |
|------------|--------------|
| <i>net</i> | The network. |
|------------|--------------|

## 9.127.2.2 ULHNPredictor() [2/3]

```
template<typename Network = UNetwork<>, typename EdgeRndIt = typename std::vector<typename
Network::Edge>::const_iterator, typename ScoreRndIt = typename std::vector<double>::iterator,
typename EdgeRndOutIt = typename std::vector<typename Network::Edge>::iterator>
LinkPred::ULHNPredictor< Network, EdgeRndIt, ScoreRndIt, EdgeRndOutIt >::ULHNPredictor (
    ULHNPredictor< Network, EdgeRndIt, ScoreRndIt, EdgeRndOutIt > const & that )
[default]
```

Copy constructor.

## Parameters

|             |                     |
|-------------|---------------------|
| <i>that</i> | The object to copy. |
|-------------|---------------------|

## 9.127.2.3 ULHNPredictor() [3/3]

```
template<typename Network = UNetwork<>, typename EdgeRndIt = typename std::vector<typename
Network::Edge>::const_iterator, typename ScoreRndIt = typename std::vector<double>::iterator,
```

```

typename EdgeRndOutIt = typename std::vector<typename Network::Edge>::iterator>
LinkPred::ULHNPredictor< Network, EdgeRndIt, ScoreRndIt, EdgeRndOutIt >::ULHNPredictor (
    ULHNPredictor< Network, EdgeRndIt, ScoreRndIt, EdgeRndOutIt > && that ) [default]

```

Move constructor.

#### Parameters

|             |                     |
|-------------|---------------------|
| <i>that</i> | The object to move. |
|-------------|---------------------|

### 9.127.2.4 ~ULHNPredictor()

```

template<typename Network = UNetwork<>, typename EdgeRndIt = typename std::vector<typename
Network::Edge>::const_iterator, typename ScoreRndIt = typename std::vector<double>::iterator,
typename EdgeRndOutIt = typename std::vector<typename Network::Edge>::iterator>
virtual LinkPred::ULHNPredictor< Network, EdgeRndIt, ScoreRndIt, EdgeRndOutIt >::~~ULHNPredictor
( ) [virtual], [default]

```

Destructor.

## 9.127.3 Member Function Documentation

### 9.127.3.1 init()

```

template<typename Network = UNetwork<>, typename EdgeRndIt = typename std::vector<typename
Network::Edge>::const_iterator, typename ScoreRndIt = typename std::vector<double>::iterator,
typename EdgeRndOutIt = typename std::vector<typename Network::Edge>::iterator>
virtual void LinkPred::ULHNPredictor< Network, EdgeRndIt, ScoreRndIt, EdgeRndOutIt >::init ( )
[inline], [virtual]

```

Initialize the predictor.

Implements [LinkPred::ULPredictor< UNetwork<>, typename std::vector< typename UNetwork<> ::Edge >::const\\_iterator, typena](#)

### 9.127.3.2 learn()

```

template<typename Network = UNetwork<>, typename EdgeRndIt = typename std::vector<typename
Network::Edge>::const_iterator, typename ScoreRndIt = typename std::vector<double>::iterator,
typename EdgeRndOutIt = typename std::vector<typename Network::Edge>::iterator>
virtual void LinkPred::ULHNPredictor< Network, EdgeRndIt, ScoreRndIt, EdgeRndOutIt >::learn (
) [inline], [virtual]

```

Learning.

Implements [LinkPred::ULPredictor< UNetwork<>, typename std::vector< typename UNetwork<> ::Edge >::const\\_iterator, typena](#)

**9.127.3.3 operator=()** [1/2]

```
template<typename Network = UNetwork<>, typename EdgeRndIt = typename std::vector<typename
Network::Edge>::const_iterator, typename ScoreRndIt = typename std::vector<double>::iterator,
typename EdgeRndOutIt = typename std::vector<typename Network::Edge>::iterator>
ULHNPredictor& LinkPred::ULHNPredictor< Network, EdgeRndIt, ScoreRndIt, EdgeRndOutIt >::operator=
(
    ULHNPredictor< Network, EdgeRndIt, ScoreRndIt, EdgeRndOutIt > && that ) [default]
```

Move assignment operator.

**Parameters**

|             |                     |
|-------------|---------------------|
| <i>that</i> | The object to move. |
|-------------|---------------------|

**9.127.3.4 operator=()** [2/2]

```
template<typename Network = UNetwork<>, typename EdgeRndIt = typename std::vector<typename
Network::Edge>::const_iterator, typename ScoreRndIt = typename std::vector<double>::iterator,
typename EdgeRndOutIt = typename std::vector<typename Network::Edge>::iterator>
ULHNPredictor& LinkPred::ULHNPredictor< Network, EdgeRndIt, ScoreRndIt, EdgeRndOutIt >::operator=
(
    ULHNPredictor< Network, EdgeRndIt, ScoreRndIt, EdgeRndOutIt > const & that )
[default]
```

Copy assignment operator.

**Parameters**

|             |                     |
|-------------|---------------------|
| <i>that</i> | The object to copy. |
|-------------|---------------------|

**9.127.3.5 predict()**

```
template<typename Network = UNetwork<>, typename EdgeRndIt = typename std::vector<typename
Network::Edge>::const_iterator, typename ScoreRndIt = typename std::vector<double>::iterator,
typename EdgeRndOutIt = typename std::vector<typename Network::Edge>::iterator>
virtual void LinkPred::ULHNPredictor< Network, EdgeRndIt, ScoreRndIt, EdgeRndOutIt >::predict
(
    EdgeRndIt begin,
    EdgeRndIt end,
    ScoreRndIt scores ) [virtual]
```

Predict the links.

**Parameters**

|               |                                         |
|---------------|-----------------------------------------|
| <i>begin</i>  | Beginning of the links to be predicted. |
| <i>end</i>    | end of the links to be predicted.       |
| <i>scores</i> | Beginning of scores.                    |

Reimplemented from [LinkPred::ULPredictor< UNetwork<>, typename std::vector< typename UNetwork<> ::Edge >::const\\_iterator](#)

### 9.127.3.6 score()

```
template<typename Network = UNetwork<>, typename EdgeRndIt = typename std::vector<typename
Network::Edge>::const_iterator, typename ScoreRndIt = typename std::vector<double>::iterator,
typename EdgeRndOutIt = typename std::vector<typename Network::Edge>::iterator>
virtual double LinkPred::ULHNPredictor< Network, EdgeRndIt, ScoreRndIt, EdgeRndOutIt >::score
(
    Edge const & e ) [inline], [virtual]
```

Compute the score of a single edge.

#### Parameters

|          |           |
|----------|-----------|
| <i>e</i> | The edge. |
|----------|-----------|

#### Returns

The score of *e*.

### 9.127.3.7 top()

```
template<typename Network = UNetwork<>, typename EdgeRndIt = typename std::vector<typename
Network::Edge>::const_iterator, typename ScoreRndIt = typename std::vector<double>::iterator,
typename EdgeRndOutIt = typename std::vector<typename Network::Edge>::iterator>
virtual std::size_t LinkPred::ULHNPredictor< Network, EdgeRndIt, ScoreRndIt, EdgeRndOutIt >↔
::top (
    std::size_t k,
    EdgeRndOutIt eit,
    ScoreRndIt sit ) [virtual]
```

Finds the *k* negative edges with the top score. Ties are broken randmly.

#### Parameters

|            |                                                                                                         |
|------------|---------------------------------------------------------------------------------------------------------|
| <i>k</i>   | The number of edges to find.                                                                            |
| <i>eit</i> | An output iterator where the edges are written.                                                         |
| <i>sit</i> | An output iterator where the scores are written. The scores are written in the same order as the edges. |

#### Returns

The number of negative edges inserted. It is the minimum between *k* and the number of negative edges in the network.

Reimplemented from [LinkPred::ULPredictor< UNetwork<>, typename std::vector< typename UNetwork<> ::Edge >::const\\_iterator](#)

The documentation for this class was generated from the following file:

- [include/linkpred/predictors/undirected/ulhnpredictor.hpp](#)

## 9.128 LinkPred::ULPredictor< NetworkT, EdgeRndItT, ScoreRndItT, EdgeRndOutItT > Class Template Reference

The interface of a link predictor in an undirected network.

```
#include <ulpredictor.hpp>
```

### Public Types

- using [Network](#) = NetworkT
- using [EdgeRndIt](#) = EdgeRndItT
- using [ScoreRndIt](#) = ScoreRndItT
- using [EdgeRndOutIt](#) = EdgeRndOutItT
- using [NodeID](#) = typename NetworkT::NodeID
- using [Edge](#) = typename NetworkT::Edge

### Public Member Functions

- [ULPredictor](#) (std::shared\_ptr< [Network](#) const > net)
- [ULPredictor](#) ([ULPredictor](#) const &that)=default
- [ULPredictor](#) & [operator=](#) ([ULPredictor](#) const &that)=default
- [ULPredictor](#) ([ULPredictor](#) &&that)=default
- [ULPredictor](#) & [operator=](#) ([ULPredictor](#) &&that)=default
- virtual void [init](#) ()=0
- virtual void [learn](#) ()=0
- virtual void [predict](#) ([EdgeRndIt](#) begin, [EdgeRndIt](#) end, [ScoreRndIt](#) scores)
- virtual std::pair< typename NetworkT::NonEdgeIt, typename NetworkT::NonEdgeIt > [predictNeg](#) ([ScoreRndIt](#) scores)
- virtual double [score](#) ([Edge](#) const &e)=0
- virtual std::size\_t [top](#) (std::size\_t k, [EdgeRndOutIt](#) eit, [ScoreRndIt](#) sit)
- auto [getNet](#) () const
- const std::string & [getName](#) () const
- void [setName](#) (const std::string &name)
- virtual [~ULPredictor](#) ()=default

### 9.128.1 Detailed Description

```
template<typename NetworkT = UNetwork<>, typename EdgeRndItT = typename std::vector<typename NetworkT::Edge>::const_iterator,
typename ScoreRndItT = typename std::vector<double>::iterator, typename EdgeRndOutItT = typename std::vector<typename NetworkT::Edge>::iterator>
class LinkPred::ULPredictor< NetworkT, EdgeRndItT, ScoreRndItT, EdgeRndOutItT >
```

The interface of a link predictor in an undirected network.

## Template Parameters

|                    |                                                   |
|--------------------|---------------------------------------------------|
| <i>NetworkT</i>    | The network type.                                 |
| <i>EdgeRndItT</i>  | A random iterator type used to iterate on edges.  |
| <i>ScoreRndItT</i> | A random iterator type used to iterate on scores. |

## Parameters

|                      |                                          |
|----------------------|------------------------------------------|
| <i>EdgeRndOutItT</i> | A random output iterator to write edges. |
|----------------------|------------------------------------------|

## 9.128.2 Member Typedef Documentation

## 9.128.2.1 Edge

```
template<typename NetworkT = UNetwork<>, typename EdgeRndItT = typename std::vector<typename
NetworkT::Edge>::const_iterator, typename ScoreRndItT = typename std::vector<double>::iterator,
typename EdgeRndOutItT = typename std::vector<typename NetworkT::Edge>::iterator>
using LinkPred::ULPredictor< NetworkT, EdgeRndItT, ScoreRndItT, EdgeRndOutItT >::Edge = typename
Network::Edge
```

The edges type.

## 9.128.2.2 EdgeRndIt

```
template<typename NetworkT = UNetwork<>, typename EdgeRndItT = typename std::vector<typename
NetworkT::Edge>::const_iterator, typename ScoreRndItT = typename std::vector<double>::iterator,
typename EdgeRndOutItT = typename std::vector<typename NetworkT::Edge>::iterator>
using LinkPred::ULPredictor< NetworkT, EdgeRndItT, ScoreRndItT, EdgeRndOutItT >::EdgeRndIt =
EdgeRndItT
```

A random iterator type used to iterate on edges.

## 9.128.2.3 EdgeRndOutIt

```
template<typename NetworkT = UNetwork<>, typename EdgeRndItT = typename std::vector<typename
NetworkT::Edge>::const_iterator, typename ScoreRndItT = typename std::vector<double>::iterator,
typename EdgeRndOutItT = typename std::vector<typename NetworkT::Edge>::iterator>
using LinkPred::ULPredictor< NetworkT, EdgeRndItT, ScoreRndItT, EdgeRndOutItT >::EdgeRndOutIt
= EdgeRndOutItT
```

A random output iterator to write edges.

### 9.128.2.4 Network

```
template<typename NetworkT = UNetwork<>, typename EdgeRndItT = typename std::vector<typename
NetworkT::Edge>::const_iterator, typename ScoreRndItT = typename std::vector<double>::iterator,
typename EdgeRndOutItT = typename std::vector<typename NetworkT::Edge>::iterator>
using LinkPred::ULPredictor< NetworkT, EdgeRndItT, ScoreRndItT, EdgeRndOutItT >::Network =
NetworkT
```

The network type.

### 9.128.2.5 NodeID

```
template<typename NetworkT = UNetwork<>, typename EdgeRndItT = typename std::vector<typename
NetworkT::Edge>::const_iterator, typename ScoreRndItT = typename std::vector<double>::iterator,
typename EdgeRndOutItT = typename std::vector<typename NetworkT::Edge>::iterator>
using LinkPred::ULPredictor< NetworkT, EdgeRndItT, ScoreRndItT, EdgeRndOutItT >::NodeID =
typename Network::NodeID
```

The node IDs type.

### 9.128.2.6 ScoreRndIt

```
template<typename NetworkT = UNetwork<>, typename EdgeRndItT = typename std::vector<typename
NetworkT::Edge>::const_iterator, typename ScoreRndItT = typename std::vector<double>::iterator,
typename EdgeRndOutItT = typename std::vector<typename NetworkT::Edge>::iterator>
using LinkPred::ULPredictor< NetworkT, EdgeRndItT, ScoreRndItT, EdgeRndOutItT >::ScoreRndIt =
ScoreRndItT
```

A random iterator type used to iterate on scores.

## 9.128.3 Constructor & Destructor Documentation

### 9.128.3.1 ULPredictor() [1/3]

```
template<typename NetworkT = UNetwork<>, typename EdgeRndItT = typename std::vector<typename
NetworkT::Edge>::const_iterator, typename ScoreRndItT = typename std::vector<double>::iterator,
typename EdgeRndOutItT = typename std::vector<typename NetworkT::Edge>::iterator>
LinkPred::ULPredictor< NetworkT, EdgeRndItT, ScoreRndItT, EdgeRndOutItT >::ULPredictor (
    std::shared_ptr< Network const > net ) [inline]
```

Constructor.

#### Parameters

|            |              |
|------------|--------------|
| <i>net</i> | The network. |
|------------|--------------|

**9.128.3.2 ULPredictor()** [2/3]

```
template<typename NetworkT = UNetwork<>, typename EdgeRndItT = typename std::vector<typename
NetworkT::Edge>::const_iterator, typename ScoreRndItT = typename std::vector<double>::iterator,
typename EdgeRndOutItT = typename std::vector<typename NetworkT::Edge>::iterator>
LinkPred::ULPredictor< NetworkT, EdgeRndItT, ScoreRndItT, EdgeRndOutItT >::ULPredictor (
    ULPredictor< NetworkT, EdgeRndItT, ScoreRndItT, EdgeRndOutItT > const & that )
[default]
```

Copy constructor.

**Parameters**

|             |                     |
|-------------|---------------------|
| <i>that</i> | The object to copy. |
|-------------|---------------------|

**9.128.3.3 ULPredictor()** [3/3]

```
template<typename NetworkT = UNetwork<>, typename EdgeRndItT = typename std::vector<typename
NetworkT::Edge>::const_iterator, typename ScoreRndItT = typename std::vector<double>::iterator,
typename EdgeRndOutItT = typename std::vector<typename NetworkT::Edge>::iterator>
LinkPred::ULPredictor< NetworkT, EdgeRndItT, ScoreRndItT, EdgeRndOutItT >::ULPredictor (
    ULPredictor< NetworkT, EdgeRndItT, ScoreRndItT, EdgeRndOutItT > && that ) [default]
```

Move constructor.

**Parameters**

|             |                     |
|-------------|---------------------|
| <i>that</i> | The object to move. |
|-------------|---------------------|

**9.128.3.4 ~ULPredictor()**

```
template<typename NetworkT = UNetwork<>, typename EdgeRndItT = typename std::vector<typename
NetworkT::Edge>::const_iterator, typename ScoreRndItT = typename std::vector<double>::iterator,
typename EdgeRndOutItT = typename std::vector<typename NetworkT::Edge>::iterator>
virtual LinkPred::ULPredictor< NetworkT, EdgeRndItT, ScoreRndItT, EdgeRndOutItT >::~~ULPredictor
( ) [virtual], [default]
```

Destructor.

**9.128.4 Member Function Documentation**



#### 9.128.4.1 getName()

```
template<typename NetworkT = UNetwork<>, typename EdgeRndItT = typename std::vector<typename
NetworkT::Edge>::const_iterator, typename ScoreRndItT = typename std::vector<double>::iterator,
typename EdgeRndOutItT = typename std::vector<typename NetworkT::Edge>::iterator>
const std::string& LinkPred::ULPredictor< NetworkT, EdgeRndItT, ScoreRndItT, EdgeRndOutItT >↔
::getName ( ) const [inline]
```

##### Returns

The name of the predictor.

#### 9.128.4.2 getNet()

```
template<typename NetworkT = UNetwork<>, typename EdgeRndItT = typename std::vector<typename
NetworkT::Edge>::const_iterator, typename ScoreRndItT = typename std::vector<double>::iterator,
typename EdgeRndOutItT = typename std::vector<typename NetworkT::Edge>::iterator>
auto LinkPred::ULPredictor< NetworkT, EdgeRndItT, ScoreRndItT, EdgeRndOutItT >::getNet ( )
const [inline]
```

##### Returns

The network.

#### 9.128.4.3 init()

```
template<typename NetworkT = UNetwork<>, typename EdgeRndItT = typename std::vector<typename
NetworkT::Edge>::const_iterator, typename ScoreRndItT = typename std::vector<double>::iterator,
typename EdgeRndOutItT = typename std::vector<typename NetworkT::Edge>::iterator>
virtual void LinkPred::ULPredictor< NetworkT, EdgeRndItT, ScoreRndItT, EdgeRndOutItT >::init (
) [pure virtual]
```

Initialize the solver.

Implemented in [LinkPred::UHYPredictor< Network, EdgeRndIt, ScoreRndIt, EdgeRndOutIt >](#), [LinkPred::UMPSPredictor< Network, EdgeRndIt, ScoreRndIt, EdgeRndOutIt >](#), [LinkPred::UKABPredictor< Network, EdgeRndIt, ScoreRndIt, EdgeRndOutIt >](#), [LinkPred::UHRGPredictor< Network, EdgeRndIt, ScoreRndIt, EdgeRndOutIt >](#), [LinkPred::UNEDPredictor< Network, EdgeRndIt, ScoreRndIt, EdgeRndOutIt >](#), [LinkPred::UFBMPredictor< Network, EdgeRndIt, ScoreRndIt, EdgeRndOutIt >](#), [LinkPred::USHPPredictor< Network, EdgeRndIt, ScoreRndIt, EdgeRndOutIt >](#), [LinkPred::UPSTPredictor< Network, EdgeRndIt, ScoreRndIt, EdgeRndOutIt >](#), [LinkPred::UECLPredictor< Network, EdgeRndIt, ScoreRndIt, EdgeRndOutIt >](#), [LinkPred::UESMPredictor< Network, EdgeRndIt, ScoreRndIt, EdgeRndOutIt >](#), [LinkPred::USBMPredictor< Network, EdgeRndIt, ScoreRndIt, EdgeRndOutIt >](#), [LinkPred::UCSTPredictor< Network, EdgeRndIt, ScoreRndIt, EdgeRndOutIt >](#), [LinkPred::UADAPredictor< Network, EdgeRndIt, ScoreRndIt, EdgeRndOutIt >](#), [LinkPred::UCNEPredictor< Network, EdgeRndIt, ScoreRndIt, EdgeRndOutIt >](#), [LinkPred::UCRAPredictor< Network, EdgeRndIt, ScoreRndIt, EdgeRndOutIt >](#), [LinkPred::URNDPredictor< Network, EdgeRndIt, ScoreRndIt, EdgeRndOutIt >](#), [LinkPred::USUMPredictor< Network, EdgeRndIt, ScoreRndIt, EdgeRndOutIt >](#), [LinkPred::URALPredictor< Network, EdgeRndIt, ScoreRndIt, EdgeRndOutIt >](#), [LinkPred::USOIPredictor< Network, EdgeRndIt, ScoreRndIt, EdgeRndOutIt >](#), [LinkPred::UHDIPredictor< Network, EdgeRndIt, ScoreRndIt, EdgeRndOutIt >](#), [LinkPred::UHPIPredictor< Network, EdgeRndIt, ScoreRndIt, EdgeRndOutIt >](#), [LinkPred::UJIDPredictor< Network, EdgeRndIt, ScoreRndIt, EdgeRndOutIt >](#), [LinkPred::ULHNPredictor< Network, EdgeRndIt, ScoreRndIt, EdgeRndOutIt >](#), [LinkPred::UPATPredictor< Network, EdgeRndIt, ScoreRndIt, EdgeRndOutIt >](#), [LinkPred::USAIPredictor< Network, EdgeRndIt, ScoreRndIt, EdgeRndOutIt >](#), and [LinkPred::ULCPPredictor< Network, EdgeRndIt, ScoreRndIt, EdgeRndOutIt >](#).

#### 9.128.4.4 learn()

```
template<typename NetworkT = UNetwork<>, typename EdgeRndItT = typename std::vector<typename
NetworkT::Edge>::const_iterator, typename ScoreRndItT = typename std::vector<double>::iterator,
typename EdgeRndOutItT = typename std::vector<typename NetworkT::Edge>::iterator>
virtual void LinkPred::ULPredictor< NetworkT, EdgeRndItT, ScoreRndItT, EdgeRndOutItT >::learn
( ) [pure virtual]
```

Learning.

Implemented in [LinkPred::UHYPredictor< Network, EdgeRndIt, ScoreRndIt, EdgeRndOutIt >](#), [LinkPred::UMPSPredictor< Network, EdgeRndIt, ScoreRndIt, EdgeRndOutIt >](#), [LinkPred::UKABPredictor< Network, EdgeRndIt, ScoreRndIt, EdgeRndOutIt >](#), [LinkPred::UHRGPredictor< Network, EdgeRndIt, ScoreRndIt, EdgeRndOutIt >](#), [LinkPred::UNEDPredictor< Network, EdgeRndIt, ScoreRndIt, EdgeRndOutIt >](#), [LinkPred::UFBMPredictor< Network, EdgeRndIt, ScoreRndIt, EdgeRndOutIt >](#), [LinkPred::USHPPredictor< Network, EdgeRndIt, ScoreRndIt, EdgeRndOutIt >](#), [LinkPred::UPSTPredictor< Network, EdgeRndIt, ScoreRndIt, EdgeRndOutIt >](#), [LinkPred::UECLPredictor< Network, EdgeRndIt, ScoreRndIt, EdgeRndOutIt >](#), [LinkPred::UESMPredictor< Network, EdgeRndIt, ScoreRndIt, EdgeRndOutIt >](#), [LinkPred::USBMPredictor< Network, EdgeRndIt, ScoreRndIt, EdgeRndOutIt >](#), [LinkPred::UCSTPredictor< Network, EdgeRndIt, ScoreRndIt, EdgeRndOutIt >](#), [LinkPred::UADAPredictor< Network, EdgeRndIt, ScoreRndIt, EdgeRndOutIt >](#), [LinkPred::UCNEPredictor< Network, EdgeRndIt, ScoreRndIt, EdgeRndOutIt >](#), [LinkPred::UCRAPredictor< Network, EdgeRndIt, ScoreRndIt, EdgeRndOutIt >](#), [LinkPred::URNDPredictor< Network, EdgeRndIt, ScoreRndIt, EdgeRndOutIt >](#), [LinkPred::USUMPredictor< Network, EdgeRndIt, ScoreRndIt, EdgeRndOutIt >](#), [LinkPred::URALPredictor< Network, EdgeRndIt, ScoreRndIt, EdgeRndOutIt >](#), [LinkPred::USOIPredictor< Network, EdgeRndIt, ScoreRndIt, EdgeRndOutIt >](#), [LinkPred::UHDIPredictor< Network, EdgeRndIt, ScoreRndIt, EdgeRndOutIt >](#), [LinkPred::UHPIPredictor< Network, EdgeRndIt, ScoreRndIt, EdgeRndOutIt >](#), [LinkPred::UJIDPredictor< Network, EdgeRndIt, ScoreRndIt, EdgeRndOutIt >](#), [LinkPred::ULHNPredictor< Network, EdgeRndIt, ScoreRndIt, EdgeRndOutIt >](#), [LinkPred::UPATPredictor< Network, EdgeRndIt, ScoreRndIt, EdgeRndOutIt >](#), [LinkPred::USAIPredictor< Network, EdgeRndIt, ScoreRndIt, EdgeRndOutIt >](#), and [LinkPred::ULCPPredictor< Network, EdgeRndIt, ScoreRndIt, EdgeRndOutIt >](#).

#### 9.128.4.5 operator=() [1/2]

```
template<typename NetworkT = UNetwork<>, typename EdgeRndItT = typename std::vector<typename
NetworkT::Edge>::const_iterator, typename ScoreRndItT = typename std::vector<double>::iterator,
typename EdgeRndOutItT = typename std::vector<typename NetworkT::Edge>::iterator>
ULPredictor& LinkPred::ULPredictor< NetworkT, EdgeRndItT, ScoreRndItT, EdgeRndOutItT >::operator=
(
    ULPredictor< NetworkT, EdgeRndItT, ScoreRndItT, EdgeRndOutItT > && that ) [default]
```

Move assignment operator.

Parameters

|             |                     |
|-------------|---------------------|
| <i>that</i> | The object to move. |
|-------------|---------------------|

#### 9.128.4.6 operator=() [2/2]

```
template<typename NetworkT = UNetwork<>, typename EdgeRndItT = typename std::vector<typename
NetworkT::Edge>::const_iterator, typename ScoreRndItT = typename std::vector<double>::iterator,
typename EdgeRndOutItT = typename std::vector<typename NetworkT::Edge>::iterator>
ULPredictor& LinkPred::ULPredictor< NetworkT, EdgeRndItT, ScoreRndItT, EdgeRndOutItT >::operator=
(
    ULPredictor< NetworkT, EdgeRndItT, ScoreRndItT, EdgeRndOutItT > const & that )
[default]
```

Copy assignment operator.

## Parameters

|             |                     |
|-------------|---------------------|
| <i>that</i> | The object to copy. |
|-------------|---------------------|

## 9.128.4.7 predict()

```
template<typename NetworkT = UNetwork<>, typename EdgeRndItT = typename std::vector<typename
NetworkT::Edge>::const_iterator, typename ScoreRndItT = typename std::vector<double>::iterator,
typename EdgeRndOutItT = typename std::vector<typename NetworkT::Edge>::iterator>
virtual void LinkPred::ULPredictor< NetworkT, EdgeRndItT, ScoreRndItT, EdgeRndOutItT >::predict
(
    EdgeRndIt begin,
    EdgeRndIt end,
    ScoreRndIt scores ) [inline], [virtual]
```

Predict links.

## Parameters

|               |                                                         |
|---------------|---------------------------------------------------------|
| <i>begin</i>  | Iterator to the first edge to be predicted.             |
| <i>end</i>    | end Iterator to one past the last edge to be predicted. |
| <i>scores</i> | Random output iterator to store the scores.             |

Reimplemented in [LinkPred::UHYPredictor< Network, EdgeRndIt, ScoreRndIt, EdgeRndOutIt >](#), [LinkPred::UMPSPredictor< Network, EdgeRndIt, ScoreRndIt, EdgeRndOutIt >](#), [LinkPred::UKABPredictor< Network, EdgeRndIt, ScoreRndIt, EdgeRndOutIt >](#), [LinkPred::UHRGPredictor< Network, EdgeRndIt, ScoreRndIt, EdgeRndOutIt >](#), [LinkPred::UNEDPredictor< Network, EdgeRndIt, ScoreRndIt, EdgeRndOutIt >](#), [LinkPred::UFBMPredictor< Network, EdgeRndIt, ScoreRndIt, EdgeRndOutIt >](#), [LinkPred::UCRAPredictor< Network, EdgeRndIt, ScoreRndIt, EdgeRndOutIt >](#), [LinkPred::USHPPredictor< Network, EdgeRndIt, ScoreRndIt, EdgeRndOutIt >](#), [LinkPred::USBMPredictor< Network, EdgeRndIt, ScoreRndIt, EdgeRndOutIt >](#), [LinkPred::UADAPredictor< Network, EdgeRndIt, ScoreRndIt, EdgeRndOutIt >](#), [LinkPred::URALPredictor< Network, EdgeRndIt, ScoreRndIt, EdgeRndOutIt >](#), [LinkPred::UJIDPredictor< Network, EdgeRndIt, ScoreRndIt, EdgeRndOutIt >](#), [LinkPred::UCSTPredictor< Network, EdgeRndIt, ScoreRndIt, EdgeRndOutIt >](#), [LinkPred::USAIPredictor< Network, EdgeRndIt, ScoreRndIt, EdgeRndOutIt >](#), [LinkPred::USOIPredictor< Network, EdgeRndIt, ScoreRndIt, EdgeRndOutIt >](#), [LinkPred::UHDIPredictor< Network, EdgeRndIt, ScoreRndIt, EdgeRndOutIt >](#), [LinkPred::UHPIPredictor< Network, EdgeRndIt, ScoreRndIt, EdgeRndOutIt >](#), [LinkPred::ULHNPredictor< Network, EdgeRndIt, ScoreRndIt, EdgeRndOutIt >](#), [LinkPred::UPATPredictor< Network, EdgeRndIt, ScoreRndIt, EdgeRndOutIt >](#), [LinkPred::UCNEPredictor< Network, EdgeRndIt, ScoreRndIt, EdgeRndOutIt >](#), [LinkPred::URNDPredictor< Network, EdgeRndIt, ScoreRndIt, EdgeRndOutIt >](#), [LinkPred::USUMPredictor< Network, EdgeRndIt, ScoreRndIt, EdgeRndOutIt >](#), and [LinkPred::ULCPPredictor< Network, EdgeRndIt, ScoreRndIt, EdgeRndOutIt >](#).

## 9.128.4.8 predictNeg()

```
template<typename NetworkT = UNetwork<>, typename EdgeRndItT = typename std::vector<typename
NetworkT::Edge>::const_iterator, typename ScoreRndItT = typename std::vector<double>::iterator,
typename EdgeRndOutItT = typename std::vector<typename NetworkT::Edge>::iterator>
virtual std::pair<typename Network::NonEdgeIt, typename Network::NonEdgeIt> LinkPred::ULPredictor<
NetworkT, EdgeRndItT, ScoreRndItT, EdgeRndOutItT >::predictNeg (
    ScoreRndIt scores ) [inline], [virtual]
```

Predict score for all negative (non-existing) links in the network.

**Parameters**

|               |                                             |
|---------------|---------------------------------------------|
| <i>scores</i> | Random output iterator to store the scores. |
|---------------|---------------------------------------------|

**Returns**

A pair of iterators begin and end to the range of non-existing links predicted by the method.

**9.128.4.9 score()**

```
template<typename NetworkT = UNetwork<>, typename EdgeRndItT = typename std::vector<typename
NetworkT::Edge>::const_iterator, typename ScoreRndItT = typename std::vector<double>::iterator,
typename EdgeRndOutItT = typename std::vector<typename NetworkT::Edge>::iterator>
virtual double LinkPred::ULPredictor< NetworkT, EdgeRndItT, ScoreRndItT, EdgeRndOutItT >↵
::score (
    Edge const & e ) [pure virtual]
```

Compute the score of a single edge.

**Parameters**

|          |           |
|----------|-----------|
| <i>e</i> | The edge. |
|----------|-----------|

**Returns**

The score of *e*.

**9.128.4.10 setName()**

```
template<typename NetworkT = UNetwork<>, typename EdgeRndItT = typename std::vector<typename
NetworkT::Edge>::const_iterator, typename ScoreRndItT = typename std::vector<double>::iterator,
typename EdgeRndOutItT = typename std::vector<typename NetworkT::Edge>::iterator>
void LinkPred::ULPredictor< NetworkT, EdgeRndItT, ScoreRndItT, EdgeRndOutItT >::setName (
    const std::string & name ) [inline]
```

Set the name of the predictor.

**Parameters**

|             |                                |
|-------------|--------------------------------|
| <i>name</i> | The new name of the predictor. |
|-------------|--------------------------------|

## 9.128.4.11 top()

```
template<typename NetworkT = UNetwork<>, typename EdgeRndItT = typename std::vector<typename
NetworkT::Edge>::const_iterator, typename ScoreRndItT = typename std::vector<double>::iterator,
typename EdgeRndOutItT = typename std::vector<typename NetworkT::Edge>::iterator>
virtual std::size_t LinkPred::ULPredictor< NetworkT, EdgeRndItT, ScoreRndItT, EdgeRndOutItT
>::top (
    std::size_t k,
    EdgeRndOutIt eit,
    ScoreRndIt sit ) [inline], [virtual]
```

Finds the k negative edges with the top score. Ties are broken randomly.

## Parameters

|            |                                                                                                         |
|------------|---------------------------------------------------------------------------------------------------------|
| <i>k</i>   | The number of edges to find.                                                                            |
| <i>eit</i> | An output iterator where the edges are written.                                                         |
| <i>sit</i> | An output iterator where the scores are written. The scores are written in the same order as the edges. |

## Returns

The number of negative edges inserted. It is the minimum between k and the number of negative edges in the network.

Reimplemented in [LinkPred::UKABPredictor< Network, EdgeRndIt, ScoreRndIt, EdgeRndOutIt >](#), [LinkPred::UNEDPredictor< Network, EdgeRndIt, ScoreRndIt, EdgeRndOutIt >](#), [LinkPred::UCRAPredictor< Network, EdgeRndIt, ScoreRndIt, EdgeRndOutIt >](#), [LinkPred::UADAPredictor< Network, EdgeRndIt, ScoreRndIt, EdgeRndOutIt >](#), [LinkPred::URALPredictor< Network, EdgeRndIt, ScoreRndIt, EdgeRndOutIt >](#), [LinkPred::UJIDPredictor< Network, EdgeRndIt, ScoreRndIt, EdgeRndOutIt >](#), [LinkPred::UCSTPredictor< Network, EdgeRndIt, ScoreRndIt, EdgeRndOutIt >](#), [LinkPred::USAIPredictor< Network, EdgeRndIt, ScoreRndIt, EdgeRndOutIt >](#), [LinkPred::USOIPredictor< Network, EdgeRndIt, ScoreRndIt, EdgeRndOutIt >](#), [LinkPred::UHDIPredictor< Network, EdgeRndIt, ScoreRndIt, EdgeRndOutIt >](#), [LinkPred::UHPIPredictor< Network, EdgeRndIt, ScoreRndIt, EdgeRndOutIt >](#), [LinkPred::ULHNPredictor< Network, EdgeRndIt, ScoreRndIt, EdgeRndOutIt >](#), [LinkPred::UPATPredictor< Network, EdgeRndIt, ScoreRndIt, EdgeRndOutIt >](#), [LinkPred::UCNEPredictor< Network, EdgeRndIt, ScoreRndIt, EdgeRndOutIt >](#), and [LinkPred::USUMPredictor< Network, EdgeRndIt, ScoreRndIt, EdgeRndOutIt >](#).

The documentation for this class was generated from the following file:

- [include/linkpred/predictors/undirected/ulpredictor.hpp](#)

## 9.129 LinkPred::UMPSPredictor< Network, EdgeRndIt, ScoreRndIt, EdgeRndOutIt > Class Template Reference

A scalable popularity similarity link predictor.

```
#include <umpspredictor.hpp>
```

Inheritance diagram for `LinkPred::UMPSPredictor< Network, EdgeRndIt, ScoreRndIt, EdgeRndOutIt >`:

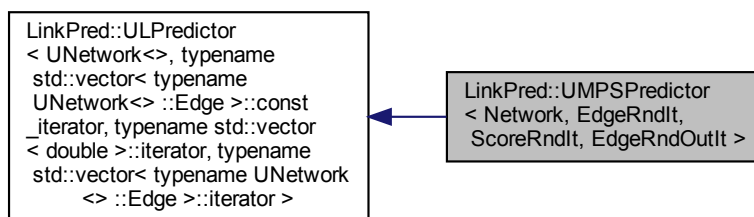

Collaboration diagram for `LinkPred::UMPSPredictor< Network, EdgeRndIt, ScoreRndIt, EdgeRndOutIt >`:

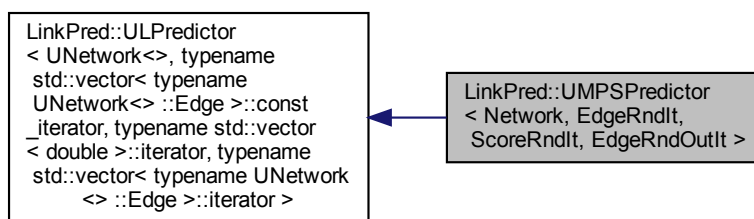

## Public Types

- enum [LandmarkStrategy](#) { [Random](#), [Hub](#), [IHub](#) }  
*An enumeration of the different landmark positioning strategies.*
- enum [LambdaMethod](#) { [User](#), [MeanApp](#), [Scan](#), [Opt](#) }  
*An enumeration of different methods to find lambda.*
- enum [EdgeLengthMethod](#) { [PAT](#), [RA1](#), [RA2](#) }  
*An enumeration of edge length methods.*

## Public Member Functions

- [UMPSPredictor](#) (std::shared\_ptr< [Network](#) const > net, double remRatio, long int seed)
- [UMPSPredictor](#) ([UMPSPredictor](#) const &that)=default
- [UMPSPredictor](#) & operator= ([UMPSPredictor](#) const &that)=default
- [UMPSPredictor](#) ([UMPSPredictor](#) &&that)=default
- [UMPSPredictor](#) & operator= ([UMPSPredictor](#) &&that)=default
- virtual void [init](#) ()
- virtual void [learn](#) ()
- virtual double [score](#) (Edge const &e)
- virtual void [predict](#) ([EdgeRndIt](#) begin, [EdgeRndIt](#) end, [ScoreRndIt](#) scores)
- auto [getLength](#) () const

- bool [getAsp](#) () const
- void [setAsp](#) (bool asp)
- double [getLandmarkRatio](#) () const
- void [setLandmarkRatio](#) (double landmarkRatio)
- [LandmarkStrategy](#) [getLandmarkStrategy](#) () const
- void [setLandmarkStrategy](#) ([LandmarkStrategy](#) landmarkStrategy)
- double [getLambda](#) () const
- void [setLambda](#) (double lambda)
- [CacheLevel](#) [getCacheLevel](#) () const
- void [setCacheLevel](#) ([CacheLevel](#) cacheLevel)
- double [getNegScore](#) () const
- void [setNegScore](#) (double negScore)
- double [getPosScore](#) () const
- void [setPosScore](#) (double posScore)
- [LambdaMethod](#) [getLambdaMethod](#) () const
- void [setLambdaMethod](#) ([LambdaMethod](#) lambdaMethod)
- double [getLambdaStep](#) () const
- void [setLambdaStep](#) (double lambdaStep)
- double [getMaxLambda](#) () const
- void [setMaxLambda](#) (double maxLambda)
- double [getMinLambda](#) () const
- void [setMinLambda](#) (double minLambda)
- auto [getPerfMeasure](#) () const
- void [setPerfMeasure](#) (std::shared\_ptr< [PerfMeasure](#)<>> perfMeasure)
- double [getTol](#) () const
- void [setTol](#) (double tol)
- double [getLambdaNegEstRatio](#) () const
- void [setLambdaNegEstRatio](#) (double lambdaNegEstRatio)
- double [getLambdaPosEstRatio](#) () const
- void [setLambdaPosEstRatio](#) (double lambdaPosEstRatio)
- [EdgeLengthMethod](#) [getEdgeLengthMethod](#) () const
- void [setEdgeLengthMethod](#) ([EdgeLengthMethod](#) edgeLengthMethod)
- virtual [~UMPSPredictor](#) ()=default

### 9.129.1 Detailed Description

```
template<typename Network = UNetwork<>, typename EdgeRndIt = typename std::vector<typename Network::Edge>::const_iterator,
typename ScoreRndIt = typename std::vector<double>::iterator, typename EdgeRndOutIt = typename std::vector<typename Network::Edge>::iterator>
class LinkPred::UMPSPredictor< Network, EdgeRndIt, ScoreRndIt, EdgeRndOutIt >
```

A scalable popularity similarity link predictor.

#### Template Parameters

|                                    |                                                   |
|------------------------------------|---------------------------------------------------|
| <i>Network</i>                     | The network type.                                 |
| <i>Edge<sub>↔</sub><br/>RndIt</i>  | A random iterator type used to iterate on edges.  |
| <i>Score<sub>↔</sub><br/>RndIt</i> | A random iterator type used to iterate on scores. |

## 9.129.2 Member Enumeration Documentation

### 9.129.2.1 EdgeLengthMethod

```
template<typename Network = UNetwork<>, typename EdgeRndIt = typename std::vector<typename
Network::Edge>::const_iterator, typename ScoreRndIt = typename std::vector<double>::iterator,
typename EdgeRndOutIt = typename std::vector<typename Network::Edge>::iterator>
enum LinkPred::UMPSPredictor::EdgeLengthMethod
```

An enumeration of edge length methods.

Enumerator

|     |                  |
|-----|------------------|
| PAT | Degree products. |
| RA1 | RA1 method.      |
| RA2 | RA2 method.      |

### 9.129.2.2 LambdaMethod

```
template<typename Network = UNetwork<>, typename EdgeRndIt = typename std::vector<typename
Network::Edge>::const_iterator, typename ScoreRndIt = typename std::vector<double>::iterator,
typename EdgeRndOutIt = typename std::vector<typename Network::Edge>::iterator>
enum LinkPred::UMPSPredictor::LambdaMethod
```

An enumeration of different methods to find lambda.

Enumerator

|         |                                            |
|---------|--------------------------------------------|
| User    | Use the value fixed by the user.           |
| MeanApp | Lambda is approximated by an average.      |
| Scan    | Scan specified values and choose the best. |
| Opt     | Find lambda by optimization.               |

### 9.129.2.3 LandmarkStrategy

```
template<typename Network = UNetwork<>, typename EdgeRndIt = typename std::vector<typename
Network::Edge>::const_iterator, typename ScoreRndIt = typename std::vector<double>::iterator,
typename EdgeRndOutIt = typename std::vector<typename Network::Edge>::iterator>
enum LinkPred::UMPSPredictor::LandmarkStrategy
```

An enumeration of the different landmark positioning strategies.



## Enumerator

|        |                                               |
|--------|-----------------------------------------------|
| Random | Landmarks are chosen randomly.                |
| Hub    | The nodes with the highest degree are chosen. |
| IHub   | The nodes with the lowest degree are chosen.  |

## 9.129.3 Constructor &amp; Destructor Documentation

## 9.129.3.1 UMPSPredictor() [1/3]

```
template<typename Network = UNetwork<>, typename EdgeRndIt = typename std::vector<typename
Network::Edge>::const_iterator, typename ScoreRndIt = typename std::vector<double>::iterator,
typename EdgeRndOutIt = typename std::vector<typename Network::Edge>::iterator>
LinkPred::UMPSPredictor< Network, EdgeRndIt, ScoreRndIt, EdgeRndOutIt >::UMPSPredictor (
    std::shared_ptr< Network const > net,
    double remRatio,
    long int seed ) [inline]
```

## Parameters

|                 |                                     |
|-----------------|-------------------------------------|
| <i>net</i>      | The network.                        |
| <i>seed</i>     | The random number generator's seed. |
| <i>remRatio</i> | Ratio of removed links.             |

## 9.129.3.2 UMPSPredictor() [2/3]

```
template<typename Network = UNetwork<>, typename EdgeRndIt = typename std::vector<typename
Network::Edge>::const_iterator, typename ScoreRndIt = typename std::vector<double>::iterator,
typename EdgeRndOutIt = typename std::vector<typename Network::Edge>::iterator>
LinkPred::UMPSPredictor< Network, EdgeRndIt, ScoreRndIt, EdgeRndOutIt >::UMPSPredictor (
    UMPSPredictor< Network, EdgeRndIt, ScoreRndIt, EdgeRndOutIt > const & that )
[default]
```

Copy constructor.

## Parameters

|             |                     |
|-------------|---------------------|
| <i>that</i> | The object to copy. |
|-------------|---------------------|

## 9.129.3.3 UMPSPredictor() [3/3]

```
template<typename Network = UNetwork<>, typename EdgeRndIt = typename std::vector<typename
```

```

Network::Edge>::const_iterator, typename ScoreRndIt = typename std::vector<double>::iterator,
typename EdgeRndOutIt = typename std::vector<typename Network::Edge>::iterator>
LinkPred::UMPSPredictor< Network, EdgeRndIt, ScoreRndIt, EdgeRndOutIt >::UMPSPredictor (
    UMPSPredictor< Network, EdgeRndIt, ScoreRndIt, EdgeRndOutIt > && that ) [default]

```

Move constructor.

#### Parameters

|             |                     |
|-------------|---------------------|
| <i>that</i> | The object to move. |
|-------------|---------------------|

### 9.129.3.4 ~UMPSPredictor()

```

template<typename Network = UNetwork<>, typename EdgeRndIt = typename std::vector<typename
Network::Edge>::const_iterator, typename ScoreRndIt = typename std::vector<double>::iterator,
typename EdgeRndOutIt = typename std::vector<typename Network::Edge>::iterator>
virtual LinkPred::UMPSPredictor< Network, EdgeRndIt, ScoreRndIt, EdgeRndOutIt >::~~UMPSPredictor
( ) [virtual], [default]

```

Destructor.

## 9.129.4 Member Function Documentation

### 9.129.4.1 getAsp()

```

template<typename Network = UNetwork<>, typename EdgeRndIt = typename std::vector<typename
Network::Edge>::const_iterator, typename ScoreRndIt = typename std::vector<double>::iterator,
typename EdgeRndOutIt = typename std::vector<typename Network::Edge>::iterator>
bool LinkPred::UMPSPredictor< Network, EdgeRndIt, ScoreRndIt, EdgeRndOutIt >::getAsp ( ) const
[inline]

```

#### Returns

Whether approximate shortest path distances are used.

### 9.129.4.2 getCacheLevel()

```

template<typename Network = UNetwork<>, typename EdgeRndIt = typename std::vector<typename
Network::Edge>::const_iterator, typename ScoreRndIt = typename std::vector<double>::iterator,
typename EdgeRndOutIt = typename std::vector<typename Network::Edge>::iterator>
CacheLevel LinkPred::UMPSPredictor< Network, EdgeRndIt, ScoreRndIt, EdgeRndOutIt >::getCache↵
Level ( ) const [inline]

```

#### Returns

The distances cache level.

#### 9.129.4.3 getEdgeLengthMethod()

```
template<typename Network = UNetwork<>, typename EdgeRndIt = typename std::vector<typename
Network::Edge>::const_iterator, typename ScoreRndIt = typename std::vector<double>::iterator,
typename EdgeRndOutIt = typename std::vector<typename Network::Edge>::iterator>
EdgeLengthMethod LinkPred::UMPSPredictor< Network, EdgeRndIt, ScoreRndIt, EdgeRndOutIt >↵
::getEdgeLengthMethod ( ) const [inline]
```

##### Returns

The method used to compute edge lengths.

#### 9.129.4.4 getLambda()

```
template<typename Network = UNetwork<>, typename EdgeRndIt = typename std::vector<typename
Network::Edge>::const_iterator, typename ScoreRndIt = typename std::vector<double>::iterator,
typename EdgeRndOutIt = typename std::vector<typename Network::Edge>::iterator>
double LinkPred::UMPSPredictor< Network, EdgeRndIt, ScoreRndIt, EdgeRndOutIt >::getLambda ( )
const [inline]
```

##### Returns

The parameter lambda.

#### 9.129.4.5 getLambdaMethod()

```
template<typename Network = UNetwork<>, typename EdgeRndIt = typename std::vector<typename
Network::Edge>::const_iterator, typename ScoreRndIt = typename std::vector<double>::iterator,
typename EdgeRndOutIt = typename std::vector<typename Network::Edge>::iterator>
LambdaMethod LinkPred::UMPSPredictor< Network, EdgeRndIt, ScoreRndIt, EdgeRndOutIt >::get↵
LambdaMethod ( ) const [inline]
```

##### Returns

The lambda estimation method.

#### 9.129.4.6 getLambdaNegEstRatio()

```
template<typename Network = UNetwork<>, typename EdgeRndIt = typename std::vector<typename
Network::Edge>::const_iterator, typename ScoreRndIt = typename std::vector<double>::iterator,
typename EdgeRndOutIt = typename std::vector<typename Network::Edge>::iterator>
double LinkPred::UMPSPredictor< Network, EdgeRndIt, ScoreRndIt, EdgeRndOutIt >::getLambdaNeg↵
EstRatio ( ) const [inline]
```

##### Returns

Ratio of negative links used to estimate lambda (used only if lambdaMethod != User).

**9.129.4.7 getLambdaPosEstRatio()**

```
template<typename Network = UNetwork<>, typename EdgeRndIt = typename std::vector<typename
Network::Edge>::const_iterator, typename ScoreRndIt = typename std::vector<double>::iterator,
typename EdgeRndOutIt = typename std::vector<typename Network::Edge>::iterator>
double LinkPred::UMPSPredictor< Network, EdgeRndIt, ScoreRndIt, EdgeRndOutIt >::getLambdaPosEstRatio ( ) const [inline]
```

**Returns**

Ratio of positive links used to estimate lambda (used only if lambdaMethod != User).

**9.129.4.8 getLambdaStep()**

```
template<typename Network = UNetwork<>, typename EdgeRndIt = typename std::vector<typename
Network::Edge>::const_iterator, typename ScoreRndIt = typename std::vector<double>::iterator,
typename EdgeRndOutIt = typename std::vector<typename Network::Edge>::iterator>
double LinkPred::UMPSPredictor< Network, EdgeRndIt, ScoreRndIt, EdgeRndOutIt >::getLambdaStep ( ) const [inline]
```

**Returns**

The step size when scanning for lambda. Used when betMethod is set to Scan.

**9.129.4.9 getLandmarkRatio()**

```
template<typename Network = UNetwork<>, typename EdgeRndIt = typename std::vector<typename
Network::Edge>::const_iterator, typename ScoreRndIt = typename std::vector<double>::iterator,
typename EdgeRndOutIt = typename std::vector<typename Network::Edge>::iterator>
double LinkPred::UMPSPredictor< Network, EdgeRndIt, ScoreRndIt, EdgeRndOutIt >::getLandmarkRatio ( ) const [inline]
```

**Returns**

The landmark ratio.

**9.129.4.10 getLandmarkStrategy()**

```
template<typename Network = UNetwork<>, typename EdgeRndIt = typename std::vector<typename
Network::Edge>::const_iterator, typename ScoreRndIt = typename std::vector<double>::iterator,
typename EdgeRndOutIt = typename std::vector<typename Network::Edge>::iterator>
LandmarkStrategy LinkPred::UMPSPredictor< Network, EdgeRndIt, ScoreRndIt, EdgeRndOutIt >::getLandmarkStrategy ( ) const [inline]
```

**Returns**

The landmark strategy.

#### 9.129.4.11 getLength()

```
template<typename Network = UNetwork<>, typename EdgeRndIt = typename std::vector<typename
Network::Edge>::const_iterator, typename ScoreRndIt = typename std::vector<double>::iterator,
typename EdgeRndOutIt = typename std::vector<typename Network::Edge>::iterator>
auto LinkPred::UMPSPredictor< Network, EdgeRndIt, ScoreRndIt, EdgeRndOutIt >::getLength ( )
const [inline]
```

##### Returns

The length map.

#### 9.129.4.12 getMaxLambda()

```
template<typename Network = UNetwork<>, typename EdgeRndIt = typename std::vector<typename
Network::Edge>::const_iterator, typename ScoreRndIt = typename std::vector<double>::iterator,
typename EdgeRndOutIt = typename std::vector<typename Network::Edge>::iterator>
double LinkPred::UMPSPredictor< Network, EdgeRndIt, ScoreRndIt, EdgeRndOutIt >::getMaxLambda (
) const [inline]
```

##### Returns

The maximum lambda value to try. Used when betMethod is set to Scan.

#### 9.129.4.13 getMinLambda()

```
template<typename Network = UNetwork<>, typename EdgeRndIt = typename std::vector<typename
Network::Edge>::const_iterator, typename ScoreRndIt = typename std::vector<double>::iterator,
typename EdgeRndOutIt = typename std::vector<typename Network::Edge>::iterator>
double LinkPred::UMPSPredictor< Network, EdgeRndIt, ScoreRndIt, EdgeRndOutIt >::getMinLambda (
) const [inline]
```

##### Returns

The minimum lambda value to try. Used when betMethod is set to Scan.

#### 9.129.4.14 getNegScore()

```
template<typename Network = UNetwork<>, typename EdgeRndIt = typename std::vector<typename
Network::Edge>::const_iterator, typename ScoreRndIt = typename std::vector<double>::iterator,
typename EdgeRndOutIt = typename std::vector<typename Network::Edge>::iterator>
double LinkPred::UMPSPredictor< Network, EdgeRndIt, ScoreRndIt, EdgeRndOutIt >::getNegScore (
) const [inline]
```

##### Returns

Score given to a negative edge.

**9.129.4.15 getPerfMeasure()**

```
template<typename Network = UNetwork<>, typename EdgeRndIt = typename std::vector<typename
Network::Edge>::const_iterator, typename ScoreRndIt = typename std::vector<double>::iterator,
typename EdgeRndOutIt = typename std::vector<typename Network::Edge>::iterator>
auto LinkPred::UMPSPredictor< Network, EdgeRndIt, ScoreRndIt, EdgeRndOutIt >::getPerfMeasure (
) const [inline]
```

**Returns**

The performance measure used to determine the best edge score method.

**9.129.4.16 getPosScore()**

```
template<typename Network = UNetwork<>, typename EdgeRndIt = typename std::vector<typename
Network::Edge>::const_iterator, typename ScoreRndIt = typename std::vector<double>::iterator,
typename EdgeRndOutIt = typename std::vector<typename Network::Edge>::iterator>
double LinkPred::UMPSPredictor< Network, EdgeRndIt, ScoreRndIt, EdgeRndOutIt >::getPosScore (
) const [inline]
```

**Returns**

Score given to a positive edge.

**9.129.4.17 getTol()**

```
template<typename Network = UNetwork<>, typename EdgeRndIt = typename std::vector<typename
Network::Edge>::const_iterator, typename ScoreRndIt = typename std::vector<double>::iterator,
typename EdgeRndOutIt = typename std::vector<typename Network::Edge>::iterator>
double LinkPred::UMPSPredictor< Network, EdgeRndIt, ScoreRndIt, EdgeRndOutIt >::getTol ( )
const [inline]
```

**Returns**

The tolerance when optimizing for lambda. Used only when lambdaMethod == Opt.

**9.129.4.18 init()**

```
template<typename Network = UNetwork<>, typename EdgeRndIt = typename std::vector<typename
Network::Edge>::const_iterator, typename ScoreRndIt = typename std::vector<double>::iterator,
typename EdgeRndOutIt = typename std::vector<typename Network::Edge>::iterator>
virtual void LinkPred::UMPSPredictor< Network, EdgeRndIt, ScoreRndIt, EdgeRndOutIt >::init ( )
[virtual]
```

Initialize the predictor.

Implements [LinkPred::ULPredictor< UNetwork<>, typename std::vector< typename UNetwork<> ::Edge >::const\\_iterator, typen](#)

**9.129.4.19 learn()**

```
template<typename Network = UNetwork<>, typename EdgeRndIt = typename std::vector<typename
Network::Edge>::const_iterator, typename ScoreRndIt = typename std::vector<double>::iterator,
typename EdgeRndOutIt = typename std::vector<typename Network::Edge>::iterator>
virtual void LinkPred::UMPSPredictor< Network, EdgeRndIt, ScoreRndIt, EdgeRndOutIt >::learn (
) [virtual]
```

Learn.

Implements [LinkPred::ULPredictor< UNetwork<>, typename std::vector< typename UNetwork<> ::Edge >::const\\_iterator, typen](#)

**9.129.4.20 operator=() [1/2]**

```
template<typename Network = UNetwork<>, typename EdgeRndIt = typename std::vector<typename
Network::Edge>::const_iterator, typename ScoreRndIt = typename std::vector<double>::iterator,
typename EdgeRndOutIt = typename std::vector<typename Network::Edge>::iterator>
UMPSPredictor& LinkPred::UMPSPredictor< Network, EdgeRndIt, ScoreRndIt, EdgeRndOutIt >::operator=
(
    UMPSPredictor< Network, EdgeRndIt, ScoreRndIt, EdgeRndOutIt > && that ) [default]
```

Move assignment operator.

**Parameters**

|             |                     |
|-------------|---------------------|
| <i>that</i> | The object to move. |
|-------------|---------------------|

**9.129.4.21 operator=() [2/2]**

```
template<typename Network = UNetwork<>, typename EdgeRndIt = typename std::vector<typename
Network::Edge>::const_iterator, typename ScoreRndIt = typename std::vector<double>::iterator,
typename EdgeRndOutIt = typename std::vector<typename Network::Edge>::iterator>
UMPSPredictor& LinkPred::UMPSPredictor< Network, EdgeRndIt, ScoreRndIt, EdgeRndOutIt >::operator=
(
    UMPSPredictor< Network, EdgeRndIt, ScoreRndIt, EdgeRndOutIt > const & that )
[default]
```

Copy assignment operator.

**Parameters**

|             |                     |
|-------------|---------------------|
| <i>that</i> | The object to copy. |
|-------------|---------------------|

**9.129.4.22 predict()**

```
template<typename Network = UNetwork<>, typename EdgeRndIt = typename std::vector<typename
Network::Edge>::const_iterator, typename ScoreRndIt = typename std::vector<double>::iterator,
typename EdgeRndOutIt = typename std::vector<typename Network::Edge>::iterator>
virtual void LinkPred::UMPSPredictor< Network, EdgeRndIt, ScoreRndIt, EdgeRndOutIt >::predict
(
    EdgeRndIt begin,
    EdgeRndIt end,
    ScoreRndIt scores ) [virtual]
```

Predict the links.

**Parameters**

|               |                                         |
|---------------|-----------------------------------------|
| <i>begin</i>  | Beginning of the links to be predicted. |
| <i>end</i>    | end of the links to be predicted.       |
| <i>scores</i> | Beginning of scores.                    |

Reimplemented from [LinkPred::ULPredictor< UNetwork<>, typename std::vector< typename UNetwork<> ::Edge >::const\\_iterator](#)

**9.129.4.23 score()**

```
template<typename Network = UNetwork<>, typename EdgeRndIt = typename std::vector<typename
Network::Edge>::const_iterator, typename ScoreRndIt = typename std::vector<double>::iterator,
typename EdgeRndOutIt = typename std::vector<typename Network::Edge>::iterator>
virtual double LinkPred::UMPSPredictor< Network, EdgeRndIt, ScoreRndIt, EdgeRndOutIt >::score
(
    Edge const & e ) [inline], [virtual]
```

Compute the score of a single edge.

**Parameters**

|          |           |
|----------|-----------|
| <i>e</i> | The edge. |
|----------|-----------|

**Returns**

The score of e.

**9.129.4.24 setAsp()**

```
template<typename Network = UNetwork<>, typename EdgeRndIt = typename std::vector<typename
Network::Edge>::const_iterator, typename ScoreRndIt = typename std::vector<double>::iterator,
typename EdgeRndOutIt = typename std::vector<typename Network::Edge>::iterator>
void LinkPred::UMPSPredictor< Network, EdgeRndIt, ScoreRndIt, EdgeRndOutIt >::setAsp (
    bool asp ) [inline]
```

Set Whether approximate shortest path distances are used.



## Parameters

|            |                                                             |
|------------|-------------------------------------------------------------|
| <i>asp</i> | Whether approximate shortest path distances should be used. |
|------------|-------------------------------------------------------------|

## 9.129.4.25 setCacheLevel()

```
template<typename Network = UNetwork<>, typename EdgeRndIt = typename std::vector<typename
Network::Edge>::const_iterator, typename ScoreRndIt = typename std::vector<double>::iterator,
typename EdgeRndOutIt = typename std::vector<typename Network::Edge>::iterator>
void LinkPred::UMPSPredictor< Network, EdgeRndIt, ScoreRndIt, EdgeRndOutIt >::setCacheLevel (
    CacheLevel cacheLevel ) [inline]
```

Set the distances cache level.

## Parameters

|                   |                                |
|-------------------|--------------------------------|
| <i>cacheLevel</i> | The new distances cache level. |
|-------------------|--------------------------------|

## 9.129.4.26 setEdgeLengthMethod()

```
template<typename Network = UNetwork<>, typename EdgeRndIt = typename std::vector<typename
Network::Edge>::const_iterator, typename ScoreRndIt = typename std::vector<double>::iterator,
typename EdgeRndOutIt = typename std::vector<typename Network::Edge>::iterator>
void LinkPred::UMPSPredictor< Network, EdgeRndIt, ScoreRndIt, EdgeRndOutIt >::setEdgeLengthMethod (
    EdgeLengthMethod edgeLengthMethod ) [inline]
```

Set the edge length method.

## Parameters

|                         |                             |
|-------------------------|-----------------------------|
| <i>edgeLengthMethod</i> | The new edge length method. |
|-------------------------|-----------------------------|

## 9.129.4.27 setLambda()

```
template<typename Network = UNetwork<>, typename EdgeRndIt = typename std::vector<typename
Network::Edge>::const_iterator, typename ScoreRndIt = typename std::vector<double>::iterator,
typename EdgeRndOutIt = typename std::vector<typename Network::Edge>::iterator>
void LinkPred::UMPSPredictor< Network, EdgeRndIt, ScoreRndIt, EdgeRndOutIt >::setLambda (
    double lambda ) [inline]
```

Set the parameter lambda.

## Parameters

|               |                                        |
|---------------|----------------------------------------|
| <i>lambda</i> | The new value of the parameter lambda. |
|---------------|----------------------------------------|

**9.129.4.28 setLambdaMethod()**

```
template<typename Network = UNetwork<>, typename EdgeRndIt = typename std::vector<typename
Network::Edge>::const_iterator, typename ScoreRndIt = typename std::vector<double>::iterator,
typename EdgeRndOutIt = typename std::vector<typename Network::Edge>::iterator>
void LinkPred::UMPSPredictor< Network, EdgeRndIt, ScoreRndIt, EdgeRndOutIt >::setLambdaMethod
(
    LambdaMethod lambdaMethod ) [inline]
```

Set the lambda estimation method.

## Parameters

|                     |                                   |
|---------------------|-----------------------------------|
| <i>lambdaMethod</i> | The new lambda estimation method. |
|---------------------|-----------------------------------|

**9.129.4.29 setLambdaNegEstRatio()**

```
template<typename Network = UNetwork<>, typename EdgeRndIt = typename std::vector<typename
Network::Edge>::const_iterator, typename ScoreRndIt = typename std::vector<double>::iterator,
typename EdgeRndOutIt = typename std::vector<typename Network::Edge>::iterator>
void LinkPred::UMPSPredictor< Network, EdgeRndIt, ScoreRndIt, EdgeRndOutIt >::setLambdaNeg←
EstRatio (
    double lambdaNegEstRatio ) [inline]
```

Set the ratio of negative links used to estimate lambda (used only if lambdaMethod != User).

## Parameters

|                          |                                                                                              |
|--------------------------|----------------------------------------------------------------------------------------------|
| <i>lambdaNegEstRatio</i> | The new ratio of negative links used to estimate lambda (used only if lambdaMethod != User). |
|--------------------------|----------------------------------------------------------------------------------------------|

**9.129.4.30 setLambdaPosEstRatio()**

```
template<typename Network = UNetwork<>, typename EdgeRndIt = typename std::vector<typename
Network::Edge>::const_iterator, typename ScoreRndIt = typename std::vector<double>::iterator,
typename EdgeRndOutIt = typename std::vector<typename Network::Edge>::iterator>
void LinkPred::UMPSPredictor< Network, EdgeRndIt, ScoreRndIt, EdgeRndOutIt >::setLambdaPos←
EstRatio (
    double lambdaPosEstRatio ) [inline]
```

Set the ratio of positive links used to estimate lambda (used only if lambdaMethod != User).

## Parameters

|                          |                                                                                              |
|--------------------------|----------------------------------------------------------------------------------------------|
| <i>lambdaPosEstRatio</i> | The new ratio of positive links used to estimate lambda (used only if lambdaMethod != User). |
|--------------------------|----------------------------------------------------------------------------------------------|

**9.129.4.31 setLambdaStep()**

```
template<typename Network = UNetwork<>, typename EdgeRndIt = typename std::vector<typename
Network::Edge>::const_iterator, typename ScoreRndIt = typename std::vector<double>::iterator,
typename EdgeRndOutIt = typename std::vector<typename Network::Edge>::iterator>
void LinkPred::UMPSPredictor< Network, EdgeRndIt, ScoreRndIt, EdgeRndOutIt >::setLambdaStep (
    double lambdaStep ) [inline]
```

Set the step size when scanning for lambda. Used when betMethod is set to Scan.

## Parameters

|                   |                                                                                 |
|-------------------|---------------------------------------------------------------------------------|
| <i>lambdaStep</i> | The new step size when scanning for lambda. Used when betMethod is set to Scan. |
|-------------------|---------------------------------------------------------------------------------|

**9.129.4.32 setLandmarkRatio()**

```
template<typename Network = UNetwork<>, typename EdgeRndIt = typename std::vector<typename
Network::Edge>::const_iterator, typename ScoreRndIt = typename std::vector<double>::iterator,
typename EdgeRndOutIt = typename std::vector<typename Network::Edge>::iterator>
void LinkPred::UMPSPredictor< Network, EdgeRndIt, ScoreRndIt, EdgeRndOutIt >::setLandmarkRatio
(
    double landmarkRatio ) [inline]
```

Set the landmark ratio.

## Parameters

|                      |                         |
|----------------------|-------------------------|
| <i>landmarkRatio</i> | The new landmark ratio. |
|----------------------|-------------------------|

**9.129.4.33 setLandmarkStrategy()**

```
template<typename Network = UNetwork<>, typename EdgeRndIt = typename std::vector<typename
Network::Edge>::const_iterator, typename ScoreRndIt = typename std::vector<double>::iterator,
typename EdgeRndOutIt = typename std::vector<typename Network::Edge>::iterator>
void LinkPred::UMPSPredictor< Network, EdgeRndIt, ScoreRndIt, EdgeRndOutIt >::setLandmark←
Strategy (
    LandmarkStrategy landmarkStrategy ) [inline]
```

Set the landmark strategy.

## Parameters

|                         |                            |
|-------------------------|----------------------------|
| <i>landmarkStrategy</i> | The new landmark strategy. |
|-------------------------|----------------------------|

**9.129.4.34 setMaxLambda()**

```
template<typename Network = UNetwork<>, typename EdgeRndIt = typename std::vector<typename
Network::Edge>::const_iterator, typename ScoreRndIt = typename std::vector<double>::iterator,
typename EdgeRndOutIt = typename std::vector<typename Network::Edge>::iterator>
void LinkPred::UMPSPredictor< Network, EdgeRndIt, ScoreRndIt, EdgeRndOutIt >::setMaxLambda (
    double maxLambda ) [inline]
```

Set the maximum lambda value to try. Used when betMethod is set to Scan.

## Parameters

|                  |                                                                          |
|------------------|--------------------------------------------------------------------------|
| <i>maxLambda</i> | The new maximum lambda value to try. Used when betMethod is set to Scan. |
|------------------|--------------------------------------------------------------------------|

**9.129.4.35 setMinLambda()**

```
template<typename Network = UNetwork<>, typename EdgeRndIt = typename std::vector<typename
Network::Edge>::const_iterator, typename ScoreRndIt = typename std::vector<double>::iterator,
typename EdgeRndOutIt = typename std::vector<typename Network::Edge>::iterator>
void LinkPred::UMPSPredictor< Network, EdgeRndIt, ScoreRndIt, EdgeRndOutIt >::setMinLambda (
    double minLambda ) [inline]
```

Set the minimum lambda value to try. Used when betMethod is set to Scan.

## Parameters

|                  |                                                                          |
|------------------|--------------------------------------------------------------------------|
| <i>minLambda</i> | The new minimum lambda value to try. Used when betMethod is set to Scan. |
|------------------|--------------------------------------------------------------------------|

**9.129.4.36 setNegScore()**

```
template<typename Network = UNetwork<>, typename EdgeRndIt = typename std::vector<typename
Network::Edge>::const_iterator, typename ScoreRndIt = typename std::vector<double>::iterator,
typename EdgeRndOutIt = typename std::vector<typename Network::Edge>::iterator>
void LinkPred::UMPSPredictor< Network, EdgeRndIt, ScoreRndIt, EdgeRndOutIt >::setNegScore (
    double negScore ) [inline]
```

Set the score given to a negative edge.

## Parameters

|                 |                                         |
|-----------------|-----------------------------------------|
| <i>negScore</i> | The new score given to a negative edge. |
|-----------------|-----------------------------------------|

**9.129.4.37 setPerfMeasure()**

```
template<typename Network = UNetwork<>, typename EdgeRndIt = typename std::vector<typename
Network::Edge>::const_iterator, typename ScoreRndIt = typename std::vector<double>::iterator,
typename EdgeRndOutIt = typename std::vector<typename Network::Edge>::iterator>
void LinkPred::UMPSPredictor< Network, EdgeRndIt, ScoreRndIt, EdgeRndOutIt >::setPerfMeasure (
    std::shared_ptr< PerfMeasure<>> perfMeasure ) [inline]
```

Set the performance measure used to determine the best edge score method.

## Parameters

|                    |                                                                           |
|--------------------|---------------------------------------------------------------------------|
| <i>perfMeasure</i> | The new performance measure used to determine the best edge score method. |
|--------------------|---------------------------------------------------------------------------|

**9.129.4.38 setPosScore()**

```
template<typename Network = UNetwork<>, typename EdgeRndIt = typename std::vector<typename
Network::Edge>::const_iterator, typename ScoreRndIt = typename std::vector<double>::iterator,
typename EdgeRndOutIt = typename std::vector<typename Network::Edge>::iterator>
void LinkPred::UMPSPredictor< Network, EdgeRndIt, ScoreRndIt, EdgeRndOutIt >::setPosScore (
    double posScore ) [inline]
```

Set the score given to a positive edge.

## Parameters

|                 |                                         |
|-----------------|-----------------------------------------|
| <i>posScore</i> | The new score given to a positive edge. |
|-----------------|-----------------------------------------|

**9.129.4.39 setTol()**

```
template<typename Network = UNetwork<>, typename EdgeRndIt = typename std::vector<typename
Network::Edge>::const_iterator, typename ScoreRndIt = typename std::vector<double>::iterator,
typename EdgeRndOutIt = typename std::vector<typename Network::Edge>::iterator>
void LinkPred::UMPSPredictor< Network, EdgeRndIt, ScoreRndIt, EdgeRndOutIt >::setTol (
    double tol ) [inline]
```

Set the tolerance when optimizing for lambda. Used only when lambdaMethod == Opt.

#### Parameters

|            |                                                                                   |
|------------|-----------------------------------------------------------------------------------|
| <i>tol</i> | The new tolerance when optimizing for lambda. Used only when lambdaMethod == Opt. |
|------------|-----------------------------------------------------------------------------------|

The documentation for this class was generated from the following file:

- [include/linkpred/predictors/undirected/umpspredictor.hpp](#)

## 9.130 LinkPred::UNEDPredictor< Network, EdgeRndIt, ScoreRndIt, EdgeRndOutIt > Class Template Reference

A neighbors degree link predictor.

```
#include <unedpredictor.hpp>
```

Inheritance diagram for LinkPred::UNEDPredictor< Network, EdgeRndIt, ScoreRndIt, EdgeRndOutIt >:

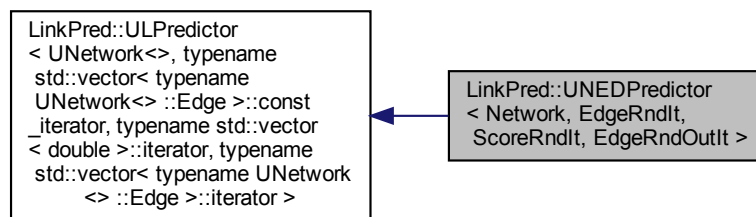

Collaboration diagram for LinkPred::UNEDPredictor< Network, EdgeRndIt, ScoreRndIt, EdgeRndOutIt >:

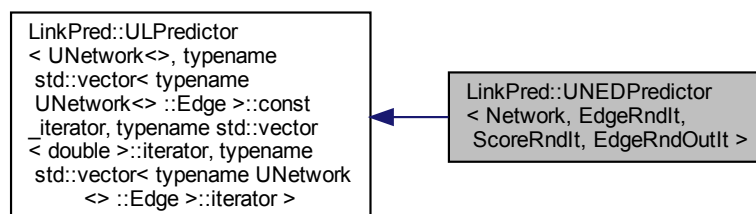

### Public Types

- using [NodeID](#) = typename [ULPredictor](#)< [Network](#), [EdgeRndIt](#), [ScoreRndIt](#), [EdgeRndOutIt](#) >::NodeID
- using [Edge](#) = typename [ULPredictor](#)< [Network](#), [EdgeRndIt](#), [ScoreRndIt](#), [EdgeRndOutIt](#) >::Edge

## Public Member Functions

- [UNEDPredictor](#) (std::shared\_ptr< [Network](#) const > net)
- [UNEDPredictor](#) ([UNEDPredictor](#) const &that)=default
- [UNEDPredictor](#) & [operator=](#) ([UNEDPredictor](#) const &that)=default
- [UNEDPredictor](#) ([UNEDPredictor](#) &&that)=default
- [UNEDPredictor](#) & [operator=](#) ([UNEDPredictor](#) &&that)=default
- virtual void [init](#) ()
- virtual void [learn](#) ()
- virtual double [score](#) ([Edge](#) const &e)
- virtual void [predict](#) ([EdgeRndIt](#) begin, [EdgeRndIt](#) end, [ScoreRndIt](#) scores)
- virtual std::size\_t [top](#) (std::size\_t k, [EdgeRndOutIt](#) eit, [ScoreRndIt](#) sit)
- virtual [~UNEDPredictor](#) ()=default

### 9.130.1 Detailed Description

```
template<typename Network = UNetwork<>, typename EdgeRndIt = typename std::vector<typename Network::Edge>::const_iterator,
typename ScoreRndIt = typename std::vector<double>::iterator, typename EdgeRndOutIt = typename std::vector<typename Network::Edge>::iterator>
class LinkPred::UNEDPredictor< Network, EdgeRndIt, ScoreRndIt, EdgeRndOutIt >
```

A neighbors degree link predictor.

#### Template Parameters

|                   |                                                   |
|-------------------|---------------------------------------------------|
| <i>Network</i>    | The network type.                                 |
| <i>EdgeRndIt</i>  | A random iterator type used to iterate on edges.  |
| <i>ScoreRndIt</i> | A random iterator type used to iterate on scores. |

### 9.130.2 Member Typedef Documentation

#### 9.130.2.1 Edge

```
template<typename Network = UNetwork<>, typename EdgeRndIt = typename std::vector<typename
Network::Edge>::const_iterator, typename ScoreRndIt = typename std::vector<double>::iterator,
typename EdgeRndOutIt = typename std::vector<typename Network::Edge>::iterator>
using LinkPred::UNEDPredictor< Network, EdgeRndIt, ScoreRndIt, EdgeRndOutIt >::Edge = typename
ULPredictor<Network, EdgeRndIt, ScoreRndIt, EdgeRndOutIt>::Edge
```

The edges type.



### 9.130.2.2 NodeID

```
template<typename Network = UNetwork<>, typename EdgeRndIt = typename std::vector<typename
Network::Edge>::const_iterator, typename ScoreRndIt = typename std::vector<double>::iterator,
typename EdgeRndOutIt = typename std::vector<typename Network::Edge>::iterator>
using LinkPred::UNEDPredictor< Network, EdgeRndIt, ScoreRndIt, EdgeRndOutIt >::NodeID = typename
ULPredictor<Network, EdgeRndIt, ScoreRndIt, EdgeRndOutIt>::NodeID
```

The node IDs type.

## 9.130.3 Constructor & Destructor Documentation

### 9.130.3.1 UNEDPredictor() [1/3]

```
template<typename Network = UNetwork<>, typename EdgeRndIt = typename std::vector<typename
Network::Edge>::const_iterator, typename ScoreRndIt = typename std::vector<double>::iterator,
typename EdgeRndOutIt = typename std::vector<typename Network::Edge>::iterator>
LinkPred::UNEDPredictor< Network, EdgeRndIt, ScoreRndIt, EdgeRndOutIt >::UNEDPredictor (
    std::shared_ptr< Network const > net ) [inline]
```

#### Parameters

|            |              |
|------------|--------------|
| <i>net</i> | The network. |
|------------|--------------|

### 9.130.3.2 UNEDPredictor() [2/3]

```
template<typename Network = UNetwork<>, typename EdgeRndIt = typename std::vector<typename
Network::Edge>::const_iterator, typename ScoreRndIt = typename std::vector<double>::iterator,
typename EdgeRndOutIt = typename std::vector<typename Network::Edge>::iterator>
LinkPred::UNEDPredictor< Network, EdgeRndIt, ScoreRndIt, EdgeRndOutIt >::UNEDPredictor (
    UNEDPredictor< Network, EdgeRndIt, ScoreRndIt, EdgeRndOutIt > const & that )
[default]
```

Copy constructor.

#### Parameters

|             |                     |
|-------------|---------------------|
| <i>that</i> | The object to copy. |
|-------------|---------------------|

### 9.130.3.3 UNEDPredictor() [3/3]

```
template<typename Network = UNetwork<>, typename EdgeRndIt = typename std::vector<typename
Network::Edge>::const_iterator, typename ScoreRndIt = typename std::vector<double>::iterator,
```

```

typename EdgeRndOutIt = typename std::vector<typename Network::Edge>::iterator>
LinkPred::UNEDPredictor< Network, EdgeRndIt, ScoreRndIt, EdgeRndOutIt >::UNEDPredictor (
    UNEDPredictor< Network, EdgeRndIt, ScoreRndIt, EdgeRndOutIt > && that ) [default]

```

Move constructor.

#### Parameters

|             |                     |
|-------------|---------------------|
| <i>that</i> | The object to move. |
|-------------|---------------------|

### 9.130.3.4 ~UNEDPredictor()

```

template<typename Network = UNetwork<>, typename EdgeRndIt = typename std::vector<typename
Network::Edge>::const_iterator, typename ScoreRndIt = typename std::vector<double>::iterator,
typename EdgeRndOutIt = typename std::vector<typename Network::Edge>::iterator>
virtual LinkPred::UNEDPredictor< Network, EdgeRndIt, ScoreRndIt, EdgeRndOutIt >::~~UNEDPredictor
( ) [virtual], [default]

```

Destructor.

## 9.130.4 Member Function Documentation

### 9.130.4.1 init()

```

template<typename Network = UNetwork<>, typename EdgeRndIt = typename std::vector<typename
Network::Edge>::const_iterator, typename ScoreRndIt = typename std::vector<double>::iterator,
typename EdgeRndOutIt = typename std::vector<typename Network::Edge>::iterator>
virtual void LinkPred::UNEDPredictor< Network, EdgeRndIt, ScoreRndIt, EdgeRndOutIt >::init ( )
[inline], [virtual]

```

Initialize the predictor.

Implements [LinkPred::ULPredictor< UNetwork<>, typename std::vector< typename UNetwork<> ::Edge >::const\\_iterator, typena](#)

### 9.130.4.2 learn()

```

template<typename Network = UNetwork<>, typename EdgeRndIt = typename std::vector<typename
Network::Edge>::const_iterator, typename ScoreRndIt = typename std::vector<double>::iterator,
typename EdgeRndOutIt = typename std::vector<typename Network::Edge>::iterator>
virtual void LinkPred::UNEDPredictor< Network, EdgeRndIt, ScoreRndIt, EdgeRndOutIt >::learn (
) [inline], [virtual]

```

Learn.

Implements [LinkPred::ULPredictor< UNetwork<>, typename std::vector< typename UNetwork<> ::Edge >::const\\_iterator, typena](#)

**9.130.4.3 operator=()** [1/2]

```
template<typename Network = UNetwork<>, typename EdgeRndIt = typename std::vector<typename
Network::Edge>::const_iterator, typename ScoreRndIt = typename std::vector<double>::iterator,
typename EdgeRndOutIt = typename std::vector<typename Network::Edge>::iterator>
UNEDPredictor& LinkPred::UNEDPredictor< Network, EdgeRndIt, ScoreRndIt, EdgeRndOutIt >::operator=
(
    UNEDPredictor< Network, EdgeRndIt, ScoreRndIt, EdgeRndOutIt > && that ) [default]
```

Move assignment operator.

**Parameters**

|             |                     |
|-------------|---------------------|
| <i>that</i> | The object to move. |
|-------------|---------------------|

**9.130.4.4 operator=()** [2/2]

```
template<typename Network = UNetwork<>, typename EdgeRndIt = typename std::vector<typename
Network::Edge>::const_iterator, typename ScoreRndIt = typename std::vector<double>::iterator,
typename EdgeRndOutIt = typename std::vector<typename Network::Edge>::iterator>
UNEDPredictor& LinkPred::UNEDPredictor< Network, EdgeRndIt, ScoreRndIt, EdgeRndOutIt >::operator=
(
    UNEDPredictor< Network, EdgeRndIt, ScoreRndIt, EdgeRndOutIt > const & that )
[default]
```

Copy assignment operator.

**Parameters**

|             |                     |
|-------------|---------------------|
| <i>that</i> | The object to copy. |
|-------------|---------------------|

**9.130.4.5 predict()**

```
template<typename Network = UNetwork<>, typename EdgeRndIt = typename std::vector<typename
Network::Edge>::const_iterator, typename ScoreRndIt = typename std::vector<double>::iterator,
typename EdgeRndOutIt = typename std::vector<typename Network::Edge>::iterator>
virtual void LinkPred::UNEDPredictor< Network, EdgeRndIt, ScoreRndIt, EdgeRndOutIt >::predict
(
    EdgeRndIt begin,
    EdgeRndIt end,
    ScoreRndIt scores ) [virtual]
```

Predict the links.

**Parameters**

|               |                                         |
|---------------|-----------------------------------------|
| <i>begin</i>  | Beginning of the links to be predicted. |
| <i>end</i>    | end of the links to be predicted.       |
| <i>scores</i> | Beginning of scores.                    |

Reimplemented from [LinkPred::ULPredictor< UNetwork<>, typename std::vector< typename UNetwork<> ::Edge >::const\\_iterator](#)

#### 9.130.4.6 score()

```
template<typename Network = UNetwork<>, typename EdgeRndIt = typename std::vector<typename
Network::Edge>::const_iterator, typename ScoreRndIt = typename std::vector<double>::iterator,
typename EdgeRndOutIt = typename std::vector<typename Network::Edge>::iterator>
virtual double LinkPred::UNEDPredictor< Network, EdgeRndIt, ScoreRndIt, EdgeRndOutIt >::score
(
    Edge const & e ) [virtual]
```

Compute the score of a single edge.

##### Parameters

|          |           |
|----------|-----------|
| <i>e</i> | The edge. |
|----------|-----------|

##### Returns

The score of *e*.

#### 9.130.4.7 top()

```
template<typename Network = UNetwork<>, typename EdgeRndIt = typename std::vector<typename
Network::Edge>::const_iterator, typename ScoreRndIt = typename std::vector<double>::iterator,
typename EdgeRndOutIt = typename std::vector<typename Network::Edge>::iterator>
virtual std::size_t LinkPred::UNEDPredictor< Network, EdgeRndIt, ScoreRndIt, EdgeRndOutIt >↔
::top (
    std::size_t k,
    EdgeRndOutIt eit,
    ScoreRndIt sit ) [virtual]
```

Finds the *k* negative edges with the top score. Ties are broken randmly.

##### Parameters

|            |                                                                                                         |
|------------|---------------------------------------------------------------------------------------------------------|
| <i>k</i>   | The number of edges to find.                                                                            |
| <i>eit</i> | An output iterator where the edges are written.                                                         |
| <i>sit</i> | An output iterator where the scores are written. The scores are written in the same order as the edges. |

##### Returns

The number of negative edges inserted. It is the minimum between *k* and the number of negative edges in the network.

Reimplemented from [LinkPred::ULPredictor< UNetwork<>, typename std::vector< typename UNetwork<> ::Edge >::const\\_iterator](#)

The documentation for this class was generated from the following file:

- [include/linkpred/predictors/undirected/unedpredictor.hpp](#)

## 9.131 LinkPred::UNetwork< LabelT, NodeIDT, EdgeT > Class Template Reference

This class represents an undirected network in the sense of graph theory.

```
#include <unetwork.hpp>
```

### Classes

- class [EdgeMap](#)  
*An edge map.*
- class [NodeDegIt](#)  
*Node-degree iterator. This class can be used to iterate over pairs of node IDs and degrees.*
- class [NodeMap](#)  
*A node map.*
- class [NodeSMap](#)  
*A sparse node map.*
- class [NonEdgeIt](#)  
*Nonedges iterator.*
- class [RndEdgeIt](#)  
*Randomized edges iterator.*
- class [RndNodeIt](#)  
*Randomized Nodes iterator.*
- class [RndNonEdgeIt](#)  
*Randomized nonedges iterator.*

### Public Types

- using [Label](#) = LabelT
- using [NodeID](#) = NodeIDT
- using [Edge](#) = EdgeT
- using [LabelIt](#) = typename [Bhmap](#)< [Label](#), [NodeID](#) >::k\_const\_iterator
- using [NodeIt](#) = typename [Bhmap](#)< [Label](#), [NodeID](#) >::p\_const\_iterator
- using [EdgeIt](#) = typename std::vector< [Edge](#) >::const\_iterator
- template<typename ValueT >  
using [NodeMapSP](#) = std::shared\_ptr< [NodeMap](#)< ValueT > >
- template<typename ValueT >  
using [NodeSMapSP](#) = std::shared\_ptr< [NodeSMap](#)< ValueT > >
- template<typename ValueT >  
using [EdgeMapSP](#) = std::shared\_ptr< [EdgeMap](#)< ValueT > >

## Public Member Functions

- [UNetwork](#) ()=default
- [UNetwork](#) (std::vector< std::pair< [Label](#), [Label](#) >> const &edges)
- [UNetwork](#) ([UNetwork](#) const &that)=default
- [UNetwork](#) & operator= ([UNetwork](#) const &that)=default
- [UNetwork](#) ([UNetwork](#) &&that)=default
- [UNetwork](#) & operator= ([UNetwork](#) &&that)=default
- std::pair< [NodeID](#), bool > [addNode](#) ([Label](#) const &nodeId)
- [NodeID](#) [getID](#) ([Label](#) const &label) const
- [Label](#) [getLabel](#) ([NodeID](#) const &iid) const
- [LabelIt](#) [findLabel](#) ([Label](#) const &label) const
- [NodeIt](#) [findNode](#) ([NodeID](#) const &iid) const
- void [addEdge](#) ([NodeID](#) const &i, [NodeID](#) const &j)
- [EdgeIt](#) [neighbBegin](#) ([NodeID](#) const &iid) const
- std::size\_t [coupleOrd](#) ([Edge](#) const &e) const
- std::size\_t [coupleAtOrd](#) (std::size\_t ord) const
- [EdgeIt](#) [neighbEnd](#) ([NodeID](#) const &iid) const
- std::size\_t [getDeg](#) ([NodeID](#) const &iid) const
- bool [isEdge](#) ([NodeID](#) const &ii, [NodeID](#) const &ij) const
- bool [isEdge](#) ([Edge](#) const &edge) const
- std::size\_t [getNbNodes](#) () const
- std::size\_t [getNbCouples](#) () const
- std::size\_t [getNbEdges](#) () const
- std::size\_t [getNbNonEdges](#) () const
- double [getAvgDeg](#) () const
- std::size\_t [getMaxDeg](#) () const
- std::size\_t [getMinDeg](#) () const
- void [assemble](#) ()
- std::pair< std::vector< std::size\_t >, std::vector< std::size\_t > > [getCSR](#) () const
- void [shuffle](#) (long int seed)
- [LabelIt](#) [labelsBegin](#) () const
- [LabelIt](#) [labelsEnd](#) () const
- [NodeIt](#) [nodesBegin](#) () const
- [NodeIt](#) [nodesEnd](#) () const
- [NodeDegIt](#) [nodesDegBegin](#) () const
- [NodeDegIt](#) [nodesDegEnd](#) () const
- [EdgeIt](#) [edgesBegin](#) () const
- [EdgeIt](#) [edgesEnd](#) () const
- [NonEdgeIt](#) [nonEdgesBegin](#) () const
- [NonEdgeIt](#) [nonEdgesEnd](#) () const
- [RndNodeIt](#) [rndNodesBegin](#) (double ratio, long int seed) const
- [RndNodeIt](#) [rndNodesEnd](#) () const
- [RndNonEdgeIt](#) [rndNonEdgesBegin](#) (double ratio, long int seed) const
- [RndNonEdgeIt](#) [rndNonEdgesEnd](#) () const
- [RndEdgeIt](#) [rndEdgesBegin](#) (double ratio, long int seed) const
- [RndEdgeIt](#) [rndEdgesEnd](#) () const
- void [getDegStat](#) (std::size\_t &minDeg, std::size\_t &maxDeg, double &avgDeg) const
- template<typename ValueT >  
  [NodeMap](#)< ValueT > [createNodeMap](#) () const
- template<typename ValueT >  
  [NodeMapSP](#)< ValueT > [createNodeMapSP](#) () const
- template<typename ValueT >  
  [NodeSMap](#)< ValueT > [createNodeSMap](#) (ValueT const &defVal) const

- template<typename ValueT >  
NodeSMapSP< ValueT > createNodeSMapSP (ValueT const &defVal) const
- template<typename ValueT >  
EdgeMap< ValueT > createEdgeMap () const
- template<typename ValueT >  
EdgeMapSP< ValueT > createEdgeMapSP () const
- std::size\_t getNbCommonNeighbors (NodeID const &i, NodeID const &j) const
- template<typename InserterIt >  
void getCommonNeighbors (NodeID const &i, NodeID const &j, InserterIt inserter) const
- std::set< NodeID > getCommonNeighbors (NodeID const &i, NodeID const &j) const
- double getCC (NodeID const &i) const
- double getCC () const
- std::size\_t getNbPaths (NodeID const &srcId, NodeID const &endId, std::size\_t length) const
- std::size\_t getNbInEdges (std::set< NodeID > const &ns) const
- std::shared\_ptr< std::vector< Edge > > readEdges (std::string fileName) const
- void write (std::string fileName) const
- void print () const
- template<typename ForwardIterator >  
void printEdges (ForwardIterator edgesBegin, ForwardIterator edgesEnd) const
- virtual ~UNetwork ()=default

## Static Public Member Functions

- static Edge makeEdge (NodeID const &i, NodeID const &j)
- static Edge reverseEdge (Edge const &e)
- static const NodeID start (Edge const &edge)
- static const NodeID end (Edge const &edge)
- static bool compareEdgeEnd (Edge const &e1, Edge const &e2)
- static std::shared\_ptr< UNetwork< Label, NodeID, Edge > > read (std::string fileName, bool ignoreRepetitions=false, bool ignoreLoops=false)
- static std::shared\_ptr< UNetwork< unsigned int, NodeID, Edge > > generateERN (std::size\_t nbNodes, double pr, long int seed)
- static std::shared\_ptr< UNetwork< unsigned int, NodeID, Edge > > generateRNC (std::size\_t nbNodes, double pr, long int seed)
- static std::shared\_ptr< UNetwork< unsigned int, NodeID, Edge > > generateREG (std::size\_t h, std::size\_t w)

### 9.131.1 Detailed Description

```
template<typename LabelT = std::string, typename NodeIDT = unsigned int, typename EdgeT = unsigned long long int>
class LinkPred::UNetwork< LabelT, NodeIDT, EdgeT >
```

This class represents an undirected network in the sense of graph theory.

#### Template Parameters

|                |                                                                                                                                      |
|----------------|--------------------------------------------------------------------------------------------------------------------------------------|
| <i>LabelT</i>  | Type of external labels.                                                                                                             |
| <i>NodeIDT</i> | Type of internal node IDs. This must be an unsigned integral type.                                                                   |
| <i>EdgeT</i>   | Type of edges. This must be an unsigned integral type having at least double the size of <code>NodeID</code> <code>UNetwork</code> . |

## 9.131.2 Member Typedef Documentation

### 9.131.2.1 Edge

```
template<typename LabelT = std::string, typename NodeIDT = unsigned int, typename EdgeT =
unsigned long long int>
using LinkPred::UNetwork< LabelT, NodeIDT, EdgeT >::Edge = EdgeT
```

Internal edge type.

### 9.131.2.2 Edgelt

```
template<typename LabelT = std::string, typename NodeIDT = unsigned int, typename EdgeT =
unsigned long long int>
using LinkPred::UNetwork< LabelT, NodeIDT, EdgeT >::EdgeIt = typename std::vector<Edge>↵
::const_iterator
```

Edge iterator.

### 9.131.2.3 EdgeMapSP

```
template<typename LabelT = std::string, typename NodeIDT = unsigned int, typename EdgeT =
unsigned long long int>
template<typename ValueT >
using LinkPred::UNetwork< LabelT, NodeIDT, EdgeT >::EdgeMapSP = std::shared_ptr<EdgeMap<ValueT>
>
```

Shared pointer to an edge map.

### 9.131.2.4 Label

```
template<typename LabelT = std::string, typename NodeIDT = unsigned int, typename EdgeT =
unsigned long long int>
using LinkPred::UNetwork< LabelT, NodeIDT, EdgeT >::Label = LabelT
```

External label type.

### 9.131.2.5 LabelIt

```
template<typename LabelT = std::string, typename NodeIDT = unsigned int, typename EdgeT =
unsigned long long int>
using LinkPred::UNetwork< LabelT, NodeIDT, EdgeT >::LabelIt = typename Bimap<Label, NodeID>↵
::k_const_iterator
```

External node iterator that offers the mapping to internal IDs.



### 9.131.2.6 NodeID

```
template<typename LabelT = std::string, typename NodeIDT = unsigned int, typename EdgeT =
unsigned long long int>
using LinkPred::UNetwork< LabelT, NodeIDT, EdgeT >::NodeID = NodeIDT
```

Internal node ID type.

### 9.131.2.7 NodeIt

```
template<typename LabelT = std::string, typename NodeIDT = unsigned int, typename EdgeT =
unsigned long long int>
using LinkPred::UNetwork< LabelT, NodeIDT, EdgeT >::NodeIt = typename Bimap<Label, NodeID>↔
::p_const_iterator
```

Internal node iterator (random access iterator).

### 9.131.2.8 NodeMapSP

```
template<typename LabelT = std::string, typename NodeIDT = unsigned int, typename EdgeT =
unsigned long long int>
template<typename ValueT >
using LinkPred::UNetwork< LabelT, NodeIDT, EdgeT >::NodeMapSP = std::shared_ptr<NodeMap<ValueT>
>
```

Shared pointer to a node map.

### 9.131.2.9 NodeSMapSP

```
template<typename LabelT = std::string, typename NodeIDT = unsigned int, typename EdgeT =
unsigned long long int>
template<typename ValueT >
using LinkPred::UNetwork< LabelT, NodeIDT, EdgeT >::NodeSMapSP = std::shared_ptr<NodeSMap<ValueT>
>
```

Shared pointer to a node map.

## 9.131.3 Constructor & Destructor Documentation

### 9.131.3.1 UNetwork() [1/4]

```
template<typename LabelT = std::string, typename NodeIDT = unsigned int, typename EdgeT =
unsigned long long int>
LinkPred::UNetwork< LabelT, NodeIDT, EdgeT >::UNetwork ( ) [default]
```

Default constructor.

### 9.131.3.2 UNetwork() [2/4]

```
template<typename LabelT = std::string, typename NodeIDT = unsigned int, typename EdgeT =
unsigned long long int>
LinkPred::UNetwork< LabelT, NodeIDT, EdgeT >::UNetwork (
    std::vector< std::pair< Label, Label >> const & edges )
```

Build the network from a list of edges. The network is assembled within this constructor.

## Parameters

|              |                |
|--------------|----------------|
| <i>edges</i> | List of edges. |
|--------------|----------------|

**9.131.3.3 UNetwork()** [3/4]

```
template<typename LabelT = std::string, typename NodeIDT = unsigned int, typename EdgeT =
unsigned long long int>
LinkPred::UNetwork< LabelT, NodeIDT, EdgeT >::UNetwork (
    UNetwork< LabelT, NodeIDT, EdgeT > const & that ) [default]
```

Copy constructor.

## Parameters

|             |                     |
|-------------|---------------------|
| <i>that</i> | The object to copy. |
|-------------|---------------------|

**9.131.3.4 UNetwork()** [4/4]

```
template<typename LabelT = std::string, typename NodeIDT = unsigned int, typename EdgeT =
unsigned long long int>
LinkPred::UNetwork< LabelT, NodeIDT, EdgeT >::UNetwork (
    UNetwork< LabelT, NodeIDT, EdgeT > && that ) [default]
```

Move constructor.

## Parameters

|             |                     |
|-------------|---------------------|
| <i>that</i> | The object to move. |
|-------------|---------------------|

**9.131.3.5 ~UNetwork()**

```
template<typename LabelT = std::string, typename NodeIDT = unsigned int, typename EdgeT =
unsigned long long int>
virtual LinkPred::UNetwork< LabelT, NodeIDT, EdgeT >::~~UNetwork ( ) [virtual], [default]
```

Destructor.

**9.131.4 Member Function Documentation**

**9.131.4.1 addEdge()**

```
template<typename LabelT = std::string, typename NodeIDT = unsigned int, typename EdgeT =
unsigned long long int>
void LinkPred::UNetwork< LabelT, NodeIDT, EdgeT >::addEdge (
    NodeID const & i,
    NodeID const & j )
```

Add an edge.

**Parameters**

|          |                    |
|----------|--------------------|
| <i>i</i> | The starting node. |
| <i>j</i> | The end node.      |

**9.131.4.2 addNode()**

```
template<typename LabelT = std::string, typename NodeIDT = unsigned int, typename EdgeT =
unsigned long long int>
std::pair<NodeID, bool> LinkPred::UNetwork< LabelT, NodeIDT, EdgeT >::addNode (
    Label const & nodeId )
```

Add a node.

**Parameters**

|                            |                     |
|----------------------------|---------------------|
| <i>nodeId</i><br><i>Id</i> | The ID of the node. |
|----------------------------|---------------------|

**Returns**

An std::pair, where first is the internal ID, and second is a boolean which is true if the node is actually added.

**9.131.4.3 assemble()**

```
template<typename LabelT = std::string, typename NodeIDT = unsigned int, typename EdgeT =
unsigned long long int>
void LinkPred::UNetwork< LabelT, NodeIDT, EdgeT >::assemble ( )
```

Assemble the network. No changes to the network are allowed after calling this method.

**9.131.4.4 compareEdgeEnd()**

```
template<typename LabelT = std::string, typename NodeIDT = unsigned int, typename EdgeT =
unsigned long long int>
static bool LinkPred::UNetwork< LabelT, NodeIDT, EdgeT >::compareEdgeEnd (
    Edge const & e1,
    Edge const & e2 ) [inline], [static]
```

Compare edge ends.

**Parameters**

|           |              |
|-----------|--------------|
| <i>e1</i> | First edge.  |
| <i>e2</i> | Second edge. |

**Returns**

True if the end of *e1* is smaller than that of *e2* (comparison is based on node IDs).

**9.131.4.5 coupleAtOrd()**

```
template<typename LabelT = std::string, typename NodeIDT = unsigned int, typename EdgeT =
unsigned long long int>
std::size_t LinkPred::UNetwork< LabelT, NodeIDT, EdgeT >::coupleAtOrd (
    std::size_t ord ) const [inline]
```

**Parameters**

|            |                       |
|------------|-----------------------|
| <i>ord</i> | The order of an edge. |
|------------|-----------------------|

**Returns**

The edge given its order.

**9.131.4.6 coupleOrd()**

```
template<typename LabelT = std::string, typename NodeIDT = unsigned int, typename EdgeT =
unsigned long long int>
std::size_t LinkPred::UNetwork< LabelT, NodeIDT, EdgeT >::coupleOrd (
    Edge const & e ) const [inline]
```

**Parameters**

|          |          |
|----------|----------|
| <i>e</i> | An edge. |
|----------|----------|

**Returns**

The order of the edge

**9.131.4.7 createEdgeMap()**

```
template<typename LabelT = std::string, typename NodeIDT = unsigned int, typename EdgeT =
unsigned long long int>
```

```
template<typename ValueT >
EdgeMap<ValueT> LinkPred::UNetwork< LabelT, NodeIDT, EdgeT >::createEdgeMap ( ) const [inline]
```

#### Template Parameters

|               |             |
|---------------|-------------|
| <i>ValueT</i> | Value type. |
|---------------|-------------|

#### Returns

An edge map.

### 9.131.4.8 createEdgeMapSP()

```
template<typename LabelT = std::string, typename NodeIDT = unsigned int, typename EdgeT =
unsigned long long int>
template<typename ValueT >
EdgeMapSP<ValueT> LinkPred::UNetwork< LabelT, NodeIDT, EdgeT >::createEdgeMapSP ( ) const
[inline]
```

#### Template Parameters

|               |             |
|---------------|-------------|
| <i>ValueT</i> | Value type. |
|---------------|-------------|

#### Returns

A pointer to an edge map.

### 9.131.4.9 createNodeMap()

```
template<typename LabelT = std::string, typename NodeIDT = unsigned int, typename EdgeT =
unsigned long long int>
template<typename ValueT >
NodeMap<ValueT> LinkPred::UNetwork< LabelT, NodeIDT, EdgeT >::createNodeMap ( ) const [inline]
```

#### Template Parameters

|               |             |
|---------------|-------------|
| <i>ValueT</i> | Value type. |
|---------------|-------------|

#### Returns

A node map.

#### 9.131.4.10 createNodeMapSP()

```
template<typename LabelT = std::string, typename NodeIDT = unsigned int, typename EdgeT =
unsigned long long int>
template<typename ValueT >
NodeMapSP<ValueT> LinkPred::UNetwork< LabelT, NodeIDT, EdgeT >::createNodeMapSP ( ) const
[inline]
```

##### Template Parameters

|               |             |
|---------------|-------------|
| <i>ValueT</i> | Value type. |
|---------------|-------------|

##### Returns

A pointer to a node map.

#### 9.131.4.11 createNodeSMap()

```
template<typename LabelT = std::string, typename NodeIDT = unsigned int, typename EdgeT =
unsigned long long int>
template<typename ValueT >
NodeSMap<ValueT> LinkPred::UNetwork< LabelT, NodeIDT, EdgeT >::createNodeSMap (
    ValueT const & defVal ) const [inline]
```

##### Template Parameters

|               |             |
|---------------|-------------|
| <i>ValueT</i> | Value type. |
|---------------|-------------|

##### Returns

A sparse node map.

#### 9.131.4.12 createNodeSMapSP()

```
template<typename LabelT = std::string, typename NodeIDT = unsigned int, typename EdgeT =
unsigned long long int>
template<typename ValueT >
NodeSMapSP<ValueT> LinkPred::UNetwork< LabelT, NodeIDT, EdgeT >::createNodeSMapSP (
    ValueT const & defVal ) const [inline]
```

##### Template Parameters

|               |             |
|---------------|-------------|
| <i>ValueT</i> | Value type. |
|---------------|-------------|

**Returns**

A pointer to a sparse node map.

**9.131.4.13 edgesBegin()**

```
template<typename LabelT = std::string, typename NodeIDT = unsigned int, typename EdgeT =
unsigned long long int>
EdgeIt LinkPred::UNetwork< LabelT, NodeIDT, EdgeT >::edgesBegin ( ) const [inline]
```

**Returns**

A read-only (constant) iterator that points to the first edge (with internal ID).

**9.131.4.14 edgesEnd()**

```
template<typename LabelT = std::string, typename NodeIDT = unsigned int, typename EdgeT =
unsigned long long int>
EdgeIt LinkPred::UNetwork< LabelT, NodeIDT, EdgeT >::edgesEnd ( ) const [inline]
```

**Returns**

A read-only (constant) iterator that points one past the last edge (with internal ID).

**9.131.4.15 end()**

```
template<typename LabelT = std::string, typename NodeIDT = unsigned int, typename EdgeT =
unsigned long long int>
static const NodeID LinkPred::UNetwork< LabelT, NodeIDT, EdgeT >::end (
    Edge const & edge ) [inline], [static]
```

**Parameters**

|             |          |
|-------------|----------|
| <i>edge</i> | An edge. |
|-------------|----------|

**Returns**

The end node of edge.

**9.131.4.16 findLabel()**

```
template<typename LabelT = std::string, typename NodeIDT = unsigned int, typename EdgeT =
unsigned long long int>
LabelIt LinkPred::UNetwork< LabelT, NodeIDT, EdgeT >::findLabel (
    Label const & label ) const [inline]
```

**Parameters**

|              |                      |
|--------------|----------------------|
| <i>label</i> | An external node ID. |
|--------------|----------------------|

**Returns**

Iterator to the external node ID.

**9.131.4.17 findNode()**

```
template<typename LabelT = std::string, typename NodeIDT = unsigned int, typename EdgeT =
unsigned long long int>
NodeIt LinkPred::UNetwork< LabelT, NodeIDT, EdgeT >::findNode (
    NodeID const & iid ) const [inline]
```

**Parameters**

|            |                      |
|------------|----------------------|
| <i>iid</i> | An internal node ID. |
|------------|----------------------|

**Returns**

Iterator to the internal node ID.

**9.131.4.18 generateERN()**

```
template<typename LabelT = std::string, typename NodeIDT = unsigned int, typename EdgeT =
unsigned long long int>
static std::shared_ptr<UNetwork<unsigned int, NodeID, Edge> > LinkPred::UNetwork< LabelT,
NodeIDT, EdgeT >::generateERN (
    std::size_t nbNodes,
    double pr,
    long int seed ) [static]
```

Generate an Erdos-Renyi (random) network.

**Parameters**

|                |                                              |
|----------------|----------------------------------------------|
| <i>nbNodes</i> | The number of nodes.                         |
| <i>pr</i>      | The probability of connecting any two nodes. |
| <i>seed</i>    | Number generator seed.                       |



**9.131.4.19 generateREG()**

```
template<typename LabelT = std::string, typename NodeIDT = unsigned int, typename EdgeT =
unsigned long long int>
static std::shared_ptr<UNetwork<unsigned int, NodeID, Edge> > LinkPred::UNetwork< LabelT,
NodeIDT, EdgeT >::generateREG (
    std::size_t h,
    std::size_t w ) [static]
```

Generate a regular two-dimensional grid of size  $h \times w$ , where  $h$  is the height of grid and  $w$  its width. The nodes are connected to their four neighbors right, left, up and down, except of course for boundary nodes. The nodes are assigned coordinates in  $[0, 1]^2$  using equi-distant spacing in each dimension. The step size in the first dimension is  $1/(h - 1)$ , in the second dimension, it is  $1/(w - 1)$ .

**Parameters**

|     |                     |
|-----|---------------------|
| $h$ | Height of the grid. |
| $w$ | Width of the grid.  |

**9.131.4.20 generateRNC()**

```
template<typename LabelT = std::string, typename NodeIDT = unsigned int, typename EdgeT =
unsigned long long int>
static std::shared_ptr<UNetwork<unsigned int, NodeID, Edge> > LinkPred::UNetwork< LabelT,
NodeIDT, EdgeT >::generateRNC (
    std::size_t nbNodes,
    double pr,
    long int seed ) [static]
```

Generate a random connected network.

**Parameters**

|           |                                              |
|-----------|----------------------------------------------|
| $nbNodes$ | The number of nodes.                         |
| $pr$      | The probability of connecting any two nodes. |
| $seed$    | Number generator seed.                       |

**9.131.4.21 getAvgDeg()**

```
template<typename LabelT = std::string, typename NodeIDT = unsigned int, typename EdgeT =
unsigned long long int>
double LinkPred::UNetwork< LabelT, NodeIDT, EdgeT >::getAvgDeg ( ) const [inline]
```

**Returns**

Average degree. Can only be called after the network is assembled.

**9.131.4.22 getCC() [1/2]**

```
template<typename LabelT = std::string, typename NodeIDT = unsigned int, typename EdgeT =
unsigned long long int>
double LinkPred::UNetwork< LabelT, NodeIDT, EdgeT >::getCC ( ) const [inline]
```

**Returns**

The average clustering coefficient of the network.

**9.131.4.23 getCC() [2/2]**

```
template<typename LabelT = std::string, typename NodeIDT = unsigned int, typename EdgeT =
unsigned long long int>
double LinkPred::UNetwork< LabelT, NodeIDT, EdgeT >::getCC (
    NodeID const & i ) const [inline]
```

**Parameters**

|          |            |
|----------|------------|
| <i>i</i> | A node ID. |
|----------|------------|

**Returns**

The clustering coefficient of *i*.

**9.131.4.24 getCommonNeighbors() [1/2]**

```
template<typename LabelT = std::string, typename NodeIDT = unsigned int, typename EdgeT =
unsigned long long int>
std::set<NodeID> LinkPred::UNetwork< LabelT, NodeIDT, EdgeT >::getCommonNeighbors (
    NodeID const & i,
    NodeID const & j ) const [inline]
```

**Parameters**

|          |            |
|----------|------------|
| <i>i</i> | A node ID. |
| <i>j</i> | A node ID. |

**Returns**

The set of common neighbors of *i* and *j* as an `std::set`.

**9.131.4.25 getCommonNeighbors() [2/2]**

```
template<typename LabelT = std::string, typename NodeIDT = unsigned int, typename EdgeT =
unsigned long long int>
template<typename InserterIt >
void LinkPred::UNetwork< LabelT, NodeIDT, EdgeT >::getCommonNeighbors (
    NodeID const & i,
    NodeID const & j,
    InserterIt inserter ) const [inline]
```

**Parameters**

|                 |                                                                                |
|-----------------|--------------------------------------------------------------------------------|
| <i>i</i>        | A node ID.                                                                     |
| <i>j</i>        | A node ID.                                                                     |
| <i>inserter</i> | An inserter iterator to insert the common neighbors of <i>i</i> and <i>j</i> . |

**9.131.4.26 getCSR()**

```
template<typename LabelT = std::string, typename NodeIDT = unsigned int, typename EdgeT =
unsigned long long int>
std::pair<std::vector<std::size_t>, std::vector<std::size_t> > LinkPred::UNetwork< LabelT,
NodeIDT, EdgeT >::getCSR ( ) const [inline]
```

**Returns**

The CSR representation of the network. The first element contains the row index, whereas the second contains the column index.

**9.131.4.27 getDeg()**

```
template<typename LabelT = std::string, typename NodeIDT = unsigned int, typename EdgeT =
unsigned long long int>
std::size_t LinkPred::UNetwork< LabelT, NodeIDT, EdgeT >::getDeg (
    NodeID const & iid ) const [inline]
```

**Parameters**

|            |                       |
|------------|-----------------------|
| <i>iid</i> | The node internal ID. |
|------------|-----------------------|

**Returns**

The degree of node iid.

**9.131.4.28 getDegStat()**

```
template<typename LabelT = std::string, typename NodeIDT = unsigned int, typename EdgeT =
unsigned long long int>
void LinkPred::UNetwork< LabelT, NodeIDT, EdgeT >::getDegStat (
    std::size_t & minDeg,
    std::size_t & maxDeg,
    double & avgDeg ) const [inline]
```

Compute some degree statistics.

**Parameters**

|               |                                    |
|---------------|------------------------------------|
| <i>minDeg</i> | (output parameter) minimum degree. |
| <i>maxDeg</i> | (output parameter) maximum degree. |
| <i>avgDeg</i> | (output parameter) average degree. |

**9.131.4.29 getID()**

```
template<typename LabelT = std::string, typename NodeIDT = unsigned int, typename EdgeT =
unsigned long long int>
NodeID LinkPred::UNetwork< LabelT, NodeIDT, EdgeT >::getID (
    Label const & label ) const [inline]
```

Translates from external label to internal IDs. This method is  $O(\log n)$ , where  $n$  is the number of nodes.

**Parameters**

|              |                         |
|--------------|-------------------------|
| <i>label</i> | An external node label. |
|--------------|-------------------------|

**Returns**

The internal ID of label;

**9.131.4.30 getLabel()**

```
template<typename LabelT = std::string, typename NodeIDT = unsigned int, typename EdgeT =
unsigned long long int>
Label LinkPred::UNetwork< LabelT, NodeIDT, EdgeT >::getLabel (
    NodeID const & iid ) const [inline]
```

**Parameters**

|            |                      |
|------------|----------------------|
| <i>iid</i> | An internal node ID. |
|------------|----------------------|

**Returns**

The external label of the node iid.

**9.131.4.31 getMaxDeg()**

```
template<typename LabelT = std::string, typename NodeIDT = unsigned int, typename EdgeT =
unsigned long long int>
std::size_t LinkPred::UNetwork< LabelT, NodeIDT, EdgeT >::getMaxDeg ( ) const [inline]
```

**Returns**

Maximum degree. Can only be called after the network is assembled.

**9.131.4.32 getMinDeg()**

```
template<typename LabelT = std::string, typename NodeIDT = unsigned int, typename EdgeT =
unsigned long long int>
std::size_t LinkPred::UNetwork< LabelT, NodeIDT, EdgeT >::getMinDeg ( ) const [inline]
```

**Returns**

Minimum degree. Can only be called after the network is assembled.

**9.131.4.33 getNbCommonNeighbors()**

```
template<typename LabelT = std::string, typename NodeIDT = unsigned int, typename EdgeT =
unsigned long long int>
std::size_t LinkPred::UNetwork< LabelT, NodeIDT, EdgeT >::getNbCommonNeighbors (
    NodeID const & i,
    NodeID const & j ) const [inline]
```

**Parameters**

|          |            |
|----------|------------|
| <i>i</i> | A node ID. |
| <i>j</i> | A node ID. |

**Returns**

The number of common neighbors between i and j.

**9.131.4.34 getNbCouples()**

```
template<typename LabelT = std::string, typename NodeIDT = unsigned int, typename EdgeT =
unsigned long long int>
std::size_t LinkPred::UNetwork< LabelT, NodeIDT, EdgeT >::getNbCouples ( ) const [inline]
```

**Returns**

The number of couples in the network.

**9.131.4.35 getNbEdges()**

```
template<typename LabelT = std::string, typename NodeIDT = unsigned int, typename EdgeT =
unsigned long long int>
std::size_t LinkPred::UNetwork< LabelT, NodeIDT, EdgeT >::getNbEdges ( ) const [inline]
```

**Returns**

The number of edges in the network.

**9.131.4.36 getNbInEdges()**

```
template<typename LabelT = std::string, typename NodeIDT = unsigned int, typename EdgeT =
unsigned long long int>
std::size_t LinkPred::UNetwork< LabelT, NodeIDT, EdgeT >::getNbInEdges (
    std::set< NodeID > const & ns ) const
```

**Parameters**

|           |                 |
|-----------|-----------------|
| <i>ns</i> | A set of nodes. |
|-----------|-----------------|

**Returns**

The number of edges connecting nodes in the set ns.

**9.131.4.37 getNbNodes()**

```
template<typename LabelT = std::string, typename NodeIDT = unsigned int, typename EdgeT =
unsigned long long int>
std::size_t LinkPred::UNetwork< LabelT, NodeIDT, EdgeT >::getNbNodes ( ) const [inline]
```

**Returns**

The number of nodes in the network.

**9.131.4.38 getNbNonEdges()**

```
template<typename LabelT = std::string, typename NodeIDT = unsigned int, typename EdgeT =
unsigned long long int>
std::size_t LinkPred::UNetwork< LabelT, NodeIDT, EdgeT >::getNbNonEdges ( ) const [inline]
```

**Returns**

The number of non-edges in the network.

**9.131.4.39 getNbPaths()**

```
template<typename LabelT = std::string, typename NodeIDT = unsigned int, typename EdgeT =
unsigned long long int>
std::size_t LinkPred::UNetwork< LabelT, NodeIDT, EdgeT >::getNbPaths (
    NodeID const & srcId,
    NodeID const & endId,
    std::size_t length ) const
```

**Parameters**

|               |                     |
|---------------|---------------------|
| <i>srcId</i>  | The source node ID. |
| <i>endId</i>  | The end node ID.    |
| <i>length</i> | Specified length.   |

**Returns**

The number of paths of length exactly length joining srcNode and endNode.

**9.131.4.40 isEdge() [1/2]**

```
template<typename LabelT = std::string, typename NodeIDT = unsigned int, typename EdgeT =
unsigned long long int>
```

```
bool LinkPred::UNetwork< LabelT, NodeIDT, EdgeT >::isEdge (
    Edge const & edge ) const
```

Check if an edge exists in  $O(k\_max)$ .

#### Parameters

|             |          |
|-------------|----------|
| <i>edge</i> | An edge. |
|-------------|----------|

#### Returns

True if edge exists in the network, false otherwise.

### 9.131.4.41 isEdge() [2/2]

```
template<typename LabelT = std::string, typename NodeIDT = unsigned int, typename EdgeT =
unsigned long long int>
bool LinkPred::UNetwork< LabelT, NodeIDT, EdgeT >::isEdge (
    NodeID const & ii,
    NodeID const & ij ) const [inline]
```

Check if an edge exists in  $O(k\_max)$ .

#### Parameters

|           |                      |
|-----------|----------------------|
| <i>ii</i> | An internal node ID. |
| <i>ij</i> | An internal node ID. |

#### Returns

true if the edge (ii, ij) exists, false otherwise.

### 9.131.4.42 labelsBegin()

```
template<typename LabelT = std::string, typename NodeIDT = unsigned int, typename EdgeT =
unsigned long long int>
LabelIt LinkPred::UNetwork< LabelT, NodeIDT, EdgeT >::labelsBegin ( ) const [inline]
```

#### Returns

A read-only (constant) external node ID iterator that points to the first node.



#### 9.131.4.43 labelsEnd()

```
template<typename LabelT = std::string, typename NodeIDT = unsigned int, typename EdgeT =
unsigned long long int>
LabelIt LinkPred::UNetwork< LabelT, NodeIDT, EdgeT >::labelsEnd ( ) const [inline]
```

##### Returns

A read-only (constant) external node ID iterator that points one past the last node.

#### 9.131.4.44 makeEdge()

```
template<typename LabelT = std::string, typename NodeIDT = unsigned int, typename EdgeT =
unsigned long long int>
static Edge LinkPred::UNetwork< LabelT, NodeIDT, EdgeT >::makeEdge (
    NodeID const & i,
    NodeID const & j ) [inline], [static]
```

Make an edge in internal representation out of two nodes' internal IDs.

##### Parameters

|          |                    |
|----------|--------------------|
| <i>i</i> | The starting node. |
| <i>j</i> | The end node.      |

##### Returns

The edge (i, j).

#### 9.131.4.45 neighbBegin()

```
template<typename LabelT = std::string, typename NodeIDT = unsigned int, typename EdgeT =
unsigned long long int>
EdgeIt LinkPred::UNetwork< LabelT, NodeIDT, EdgeT >::neighbBegin (
    NodeID const & iid ) const [inline]
```

##### Parameters

|            |                      |
|------------|----------------------|
| <i>iid</i> | An internal node ID. |
|------------|----------------------|

##### Returns

An iterator to the first neighbor of iid.

**9.131.4.46 neighbEnd()**

```
template<typename LabelT = std::string, typename NodeIDT = unsigned int, typename EdgeT =
unsigned long long int>
EdgeIt LinkPred::UNetwork< LabelT, NodeIDT, EdgeT >::neighbEnd (
    NodeID const & iid ) const [inline]
```

**Parameters**

|            |                      |
|------------|----------------------|
| <i>iid</i> | An internal node ID. |
|------------|----------------------|

**Returns**

An iterator to one past the last neighbor of iid.

**9.131.4.47 nodesBegin()**

```
template<typename LabelT = std::string, typename NodeIDT = unsigned int, typename EdgeT =
unsigned long long int>
NodeIt LinkPred::UNetwork< LabelT, NodeIDT, EdgeT >::nodesBegin ( ) const [inline]
```

**Returns**

A read-only (constant) external node ID iterator that points to the first node.

**9.131.4.48 nodesDegBegin()**

```
template<typename LabelT = std::string, typename NodeIDT = unsigned int, typename EdgeT =
unsigned long long int>
NodeDegIt LinkPred::UNetwork< LabelT, NodeIDT, EdgeT >::nodesDegBegin ( ) const [inline]
```

**Returns**

A read-only (constant) external node ID iterator that points to the first node-degree couple.

**9.131.4.49 nodesDegEnd()**

```
template<typename LabelT = std::string, typename NodeIDT = unsigned int, typename EdgeT =
unsigned long long int>
NodeDegIt LinkPred::UNetwork< LabelT, NodeIDT, EdgeT >::nodesDegEnd ( ) const [inline]
```

**Returns**

A read-only (constant) external node ID iterator that points one past the last node-degree couple.

**9.131.4.50 nodesEnd()**

```
template<typename LabelT = std::string, typename NodeIDT = unsigned int, typename EdgeT =
unsigned long long int>
NodeIt LinkPred::UNetwork< LabelT, NodeIDT, EdgeT >::nodesEnd ( ) const [inline]
```

**Returns**

A read-only (constant) external node ID iterator that points one past the last node.

**9.131.4.51 nonEdgesBegin()**

```
template<typename LabelT = std::string, typename NodeIDT = unsigned int, typename EdgeT =
unsigned long long int>
NonEdgeIt LinkPred::UNetwork< LabelT, NodeIDT, EdgeT >::nonEdgesBegin ( ) const [inline]
```

**Returns**

A read-only (constant) iterator that points to the first non-edge (with internal ID).

**9.131.4.52 nonEdgesEnd()**

```
template<typename LabelT = std::string, typename NodeIDT = unsigned int, typename EdgeT =
unsigned long long int>
NonEdgeIt LinkPred::UNetwork< LabelT, NodeIDT, EdgeT >::nonEdgesEnd ( ) const [inline]
```

**Returns**

A read-only (constant) iterator that points one past the last non-edge (with internal ID).

**9.131.4.53 operator=() [1/2]**

```
template<typename LabelT = std::string, typename NodeIDT = unsigned int, typename EdgeT =
unsigned long long int>
UNetwork& LinkPred::UNetwork< LabelT, NodeIDT, EdgeT >::operator= (
    UNetwork< LabelT, NodeIDT, EdgeT > && that ) [default]
```

Move assignment operator.

**Parameters**

|             |                     |
|-------------|---------------------|
| <i>that</i> | The object to move. |
|-------------|---------------------|

**9.131.4.54 operator=()** [2/2]

```
template<typename LabelT = std::string, typename NodeIDT = unsigned int, typename EdgeT =
unsigned long long int>
UNetwork& LinkPred::UNetwork< LabelT, NodeIDT, EdgeT >::operator= (
    UNetwork< LabelT, NodeIDT, EdgeT > const & that ) [default]
```

Copy assignment operator.

**Parameters**

|             |                     |
|-------------|---------------------|
| <i>that</i> | The object to copy. |
|-------------|---------------------|

**9.131.4.55 print()**

```
template<typename LabelT = std::string, typename NodeIDT = unsigned int, typename EdgeT =
unsigned long long int>
void LinkPred::UNetwork< LabelT, NodeIDT, EdgeT >::print ( ) const
```

Print edges to std::cout.

**9.131.4.56 printEdges()**

```
template<typename LabelT = std::string, typename NodeIDT = unsigned int, typename EdgeT =
unsigned long long int>
template<typename ForwardIterator >
void LinkPred::UNetwork< LabelT, NodeIDT, EdgeT >::printEdges (
    ForwardIterator edgesBegin,
    ForwardIterator edgesEnd ) const [inline]
```

Print edges to std::cout.

**Parameters**

|                   |                                                |
|-------------------|------------------------------------------------|
| <i>edgesBegin</i> | Iterator to the beginning of the edges.        |
| <i>edgesEnd</i>   | Iterator to one past the the end of the edges. |

**9.131.4.57 read()**

```
template<typename LabelT = std::string, typename NodeIDT = unsigned int, typename EdgeT =
unsigned long long int>
```

```
static std::shared_ptr<UNetwork<LabelT, NodeIDT, EdgeT> > LinkPred::UNetwork< LabelT, NodeIDT,
EdgeT >::read (
    std::string fileName,
    bool ignoreRepetitions = false,
    bool ignoreLoops = false ) [static]
```

Read network from file.

#### Parameters

|                          |                                   |
|--------------------------|-----------------------------------|
| <i>fileName</i>          | The file name.                    |
| <i>ignoreRepetitions</i> | Whether to ignore repeated edges. |
| <i>ignoreLoops</i>       | Whether to ignore loops.          |

#### Returns

The read network.

### 9.131.4.58 readEdges()

```
template<typename LabelT = std::string, typename NodeIDT = unsigned int, typename EdgeT =
unsigned long long int>
std::shared_ptr<std::vector<Edge> > LinkPred::UNetwork< LabelT, NodeIDT, EdgeT >::readEdges
(
    std::string fileName ) const
```

Read couples from file.

#### Parameters

|                 |                |
|-----------------|----------------|
| <i>fileName</i> | The file name. |
|-----------------|----------------|

#### Returns

The edges.

### 9.131.4.59 reverseEdge()

```
template<typename LabelT = std::string, typename NodeIDT = unsigned int, typename EdgeT =
unsigned long long int>
static Edge LinkPred::UNetwork< LabelT, NodeIDT, EdgeT >::reverseEdge (
    Edge const & e ) [inline], [static]
```

#### Parameters

|          |                |
|----------|----------------|
| <i>e</i> | An edge (i,j). |
|----------|----------------|

**Returns**

The edge (j, i).

**9.131.4.60 rndEdgesBegin()**

```
template<typename LabelT = std::string, typename NodeIDT = unsigned int, typename EdgeT =
unsigned long long int>
RndEdgeIt LinkPred::UNetwork< LabelT, NodeIDT, EdgeT >::rndEdgesBegin (
    double ratio,
    long int seed ) const [inline]
```

**Parameters**

|              |                                    |
|--------------|------------------------------------|
| <i>ratio</i> | Ratio of edges that are selected.  |
| <i>seed</i>  | The random number gnerator's seed. |

**Returns**

a read-only (constant) randomized iterator that points to the first edge (with internal ID).

**9.131.4.61 rndEdgesEnd()**

```
template<typename LabelT = std::string, typename NodeIDT = unsigned int, typename EdgeT =
unsigned long long int>
RndEdgeIt LinkPred::UNetwork< LabelT, NodeIDT, EdgeT >::rndEdgesEnd ( ) const [inline]
```

**Returns**

A read-only (constant) randomized iterator that points one past the last edge (with internal ID).

**9.131.4.62 rndNodesBegin()**

```
template<typename LabelT = std::string, typename NodeIDT = unsigned int, typename EdgeT =
unsigned long long int>
RndNodeIt LinkPred::UNetwork< LabelT, NodeIDT, EdgeT >::rndNodesBegin (
    double ratio,
    long int seed ) const [inline]
```

**Parameters**

|              |                                    |
|--------------|------------------------------------|
| <i>ratio</i> | Ratio of nodes that are selected.  |
| <i>seed</i>  | The random number gnerator's seed. |

**Returns**

a read-only (constant) randomized iterator that points to the first node (with internal ID).

**9.131.4.63 rndNodesEnd()**

```
template<typename LabelT = std::string, typename NodeIDT = unsigned int, typename EdgeT =
unsigned long long int>
RndNodeIt LinkPred::UNetwork< LabelT, NodeIDT, EdgeT >::rndNodesEnd ( ) const [inline]
```

**Returns**

A read-only (constant) randomized iterator that points one past the last node (with internal ID).

**9.131.4.64 rndNonEdgesBegin()**

```
template<typename LabelT = std::string, typename NodeIDT = unsigned int, typename EdgeT =
unsigned long long int>
RndNonEdgeIt LinkPred::UNetwork< LabelT, NodeIDT, EdgeT >::rndNonEdgesBegin (
    double ratio,
    long int seed ) const [inline]
```

**Parameters**

|              |                                      |
|--------------|--------------------------------------|
| <i>ratio</i> | Ratio of nonedges that are selected. |
| <i>seed</i>  | The random number gnerator's seed.   |

**Returns**

a read-only (constant) randomized iterator that points to the first non-edge (with internal ID).

**9.131.4.65 rndNonEdgesEnd()**

```
template<typename LabelT = std::string, typename NodeIDT = unsigned int, typename EdgeT =
unsigned long long int>
RndNonEdgeIt LinkPred::UNetwork< LabelT, NodeIDT, EdgeT >::rndNonEdgesEnd ( ) const [inline]
```

**Returns**

A read-only (constant) randomized iterator that points one past the last non-edge (with internal ID).

#### 9.131.4.66 shuffle()

```
template<typename LabelT = std::string, typename NodeIDT = unsigned int, typename EdgeT =
unsigned long long int>
void LinkPred::UNetwork< LabelT, NodeIDT, EdgeT >::shuffle (
    long int seed )
```

Shuffles the nodes' internal IDs. This is useful to eliminate bias in methods that depend on node/edge order. Upon calling this method, all iterators and maps associated with the network are invalidated.

##### Parameters

|             |                                 |
|-------------|---------------------------------|
| <i>seed</i> | Random number generator's seed. |
|-------------|---------------------------------|

#### 9.131.4.67 start()

```
template<typename LabelT = std::string, typename NodeIDT = unsigned int, typename EdgeT =
unsigned long long int>
static const NodeID LinkPred::UNetwork< LabelT, NodeIDT, EdgeT >::start (
    Edge const & edge ) [inline], [static]
```

##### Parameters

|             |          |
|-------------|----------|
| <i>edge</i> | An edge. |
|-------------|----------|

##### Returns

The starting node of edge.

#### 9.131.4.68 write()

```
template<typename LabelT = std::string, typename NodeIDT = unsigned int, typename EdgeT =
unsigned long long int>
void LinkPred::UNetwork< LabelT, NodeIDT, EdgeT >::write (
    std::string fileName ) const
```

Write adjacency matrix in sparse form to file.

##### Parameters

|                 |                |
|-----------------|----------------|
| <i>fileName</i> | the file name. |
|-----------------|----------------|

The documentation for this class was generated from the following file:

- [include/linkpred/core/unetwork/unetwork.hpp](#)



## 9.132 LinkPred::UPATPredictor< Network, EdgeRndIt, ScoreRndIt, EdgeRndOutIt > Class Template Reference

A preferential attachment link predictor.

```
#include <upatpredictor.hpp>
```

Inheritance diagram for LinkPred::UPATPredictor< Network, EdgeRndIt, ScoreRndIt, EdgeRndOutIt >:

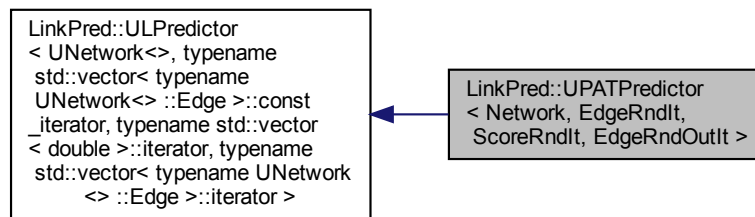

Collaboration diagram for LinkPred::UPATPredictor< Network, EdgeRndIt, ScoreRndIt, EdgeRndOutIt >:

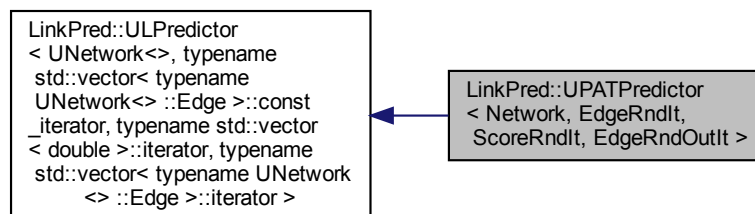

### Public Member Functions

- [UPATPredictor](#) (std::shared\_ptr< [Network](#) const > net)
- [UPATPredictor](#) ([UPATPredictor](#) const &that)=default
- [UPATPredictor](#) & [operator=](#) ([UPATPredictor](#) const &that)=default
- [UPATPredictor](#) ([UPATPredictor](#) &&that)=default
- [UPATPredictor](#) & [operator=](#) ([UPATPredictor](#) &&that)=default
- virtual void [init](#) ()
- virtual void [learn](#) ()
- virtual double [score](#) (Edge const &e)
- virtual void [predict](#) ([EdgeRndIt](#) begin, [EdgeRndIt](#) end, [ScoreRndIt](#) scores)
- virtual std::size\_t [top](#) (std::size\_t k, [EdgeRndOutIt](#) eit, [ScoreRndIt](#) sit)
- virtual [~UPATPredictor](#) ()=default

## Additional Inherited Members

### 9.132.1 Detailed Description

```
template<typename Network = UNetwork<>, typename EdgeRndIt = typename std::vector<typename Network::Edge>::const_iterator,
        typename ScoreRndIt = typename std::vector<double>::iterator, typename EdgeRndOutIt = typename std::vector<typename Network::Edge>::iterator>
class LinkPred::UPATPredictor< Network, EdgeRndIt, ScoreRndIt, EdgeRndOutIt >
```

A preferential attachment link predictor.

#### Template Parameters

|                   |                                                   |
|-------------------|---------------------------------------------------|
| <i>Network</i>    | The network type.                                 |
| <i>EdgeRndIt</i>  | A random iterator type used to iterate on edges.  |
| <i>ScoreRndIt</i> | A random iterator type used to iterate on scores. |

### 9.132.2 Constructor & Destructor Documentation

#### 9.132.2.1 UPATPredictor() [1/3]

```
template<typename Network = UNetwork<>, typename EdgeRndIt = typename std::vector<typename
Network::Edge>::const_iterator, typename ScoreRndIt = typename std::vector<double>::iterator,
typename EdgeRndOutIt = typename std::vector<typename Network::Edge>::iterator>
LinkPred::UPATPredictor< Network, EdgeRndIt, ScoreRndIt, EdgeRndOutIt >::UPATPredictor (
    std::shared_ptr< Network const > net ) [inline]
```

#### Parameters

|            |              |
|------------|--------------|
| <i>net</i> | The network. |
|------------|--------------|

#### 9.132.2.2 UPATPredictor() [2/3]

```
template<typename Network = UNetwork<>, typename EdgeRndIt = typename std::vector<typename
Network::Edge>::const_iterator, typename ScoreRndIt = typename std::vector<double>::iterator,
typename EdgeRndOutIt = typename std::vector<typename Network::Edge>::iterator>
LinkPred::UPATPredictor< Network, EdgeRndIt, ScoreRndIt, EdgeRndOutIt >::UPATPredictor (
    UPATPredictor< Network, EdgeRndIt, ScoreRndIt, EdgeRndOutIt > const & that )
[default]
```

Copy constructor.

## Parameters

|             |                     |
|-------------|---------------------|
| <i>that</i> | The object to copy. |
|-------------|---------------------|

## 9.132.2.3 UPATPredictor() [3/3]

```
template<typename Network = UNetwork<>, typename EdgeRndIt = typename std::vector<typename
Network::Edge>::const_iterator, typename ScoreRndIt = typename std::vector<double>::iterator,
typename EdgeRndOutIt = typename std::vector<typename Network::Edge>::iterator>
LinkPred::UPATPredictor< Network, EdgeRndIt, ScoreRndIt, EdgeRndOutIt >::UPATPredictor (
    UPATPredictor< Network, EdgeRndIt, ScoreRndIt, EdgeRndOutIt > && that ) [default]
```

Move constructor.

## Parameters

|             |                     |
|-------------|---------------------|
| <i>that</i> | The object to move. |
|-------------|---------------------|

## 9.132.2.4 ~UPATPredictor()

```
template<typename Network = UNetwork<>, typename EdgeRndIt = typename std::vector<typename
Network::Edge>::const_iterator, typename ScoreRndIt = typename std::vector<double>::iterator,
typename EdgeRndOutIt = typename std::vector<typename Network::Edge>::iterator>
virtual LinkPred::UPATPredictor< Network, EdgeRndIt, ScoreRndIt, EdgeRndOutIt >::~~UPATPredictor
( ) [virtual], [default]
```

Destructor.

## 9.132.3 Member Function Documentation

## 9.132.3.1 init()

```
template<typename Network = UNetwork<>, typename EdgeRndIt = typename std::vector<typename
Network::Edge>::const_iterator, typename ScoreRndIt = typename std::vector<double>::iterator,
typename EdgeRndOutIt = typename std::vector<typename Network::Edge>::iterator>
virtual void LinkPred::UPATPredictor< Network, EdgeRndIt, ScoreRndIt, EdgeRndOutIt >::init ( )
[inline], [virtual]
```

Initialize the predictor.

Implements [LinkPred::ULPredictor< UNetwork<>, typename std::vector< typename UNetwork<> ::Edge >::const\\_iterator, typena](#)

### 9.132.3.2 learn()

```
template<typename Network = UNetwork<>, typename EdgeRndIt = typename std::vector<typename
Network::Edge>::const_iterator, typename ScoreRndIt = typename std::vector<double>::iterator,
typename EdgeRndOutIt = typename std::vector<typename Network::Edge>::iterator>
virtual void LinkPred::UPATPredictor< Network, EdgeRndIt, ScoreRndIt, EdgeRndOutIt >::learn (
) [inline], [virtual]
```

Learning.

Implements [LinkPred::ULPredictor< UNetwork<>, typename std::vector< typename UNetwork<> ::Edge >::const\\_iterator, typen](#)

### 9.132.3.3 operator=() [1/2]

```
template<typename Network = UNetwork<>, typename EdgeRndIt = typename std::vector<typename
Network::Edge>::const_iterator, typename ScoreRndIt = typename std::vector<double>::iterator,
typename EdgeRndOutIt = typename std::vector<typename Network::Edge>::iterator>
UPATPredictor& LinkPred::UPATPredictor< Network, EdgeRndIt, ScoreRndIt, EdgeRndOutIt >::operator=
(
    UPATPredictor< Network, EdgeRndIt, ScoreRndIt, EdgeRndOutIt > && that ) [default]
```

Move assignment operator.

#### Parameters

|             |                     |
|-------------|---------------------|
| <i>that</i> | The object to move. |
|-------------|---------------------|

### 9.132.3.4 operator=() [2/2]

```
template<typename Network = UNetwork<>, typename EdgeRndIt = typename std::vector<typename
Network::Edge>::const_iterator, typename ScoreRndIt = typename std::vector<double>::iterator,
typename EdgeRndOutIt = typename std::vector<typename Network::Edge>::iterator>
UPATPredictor& LinkPred::UPATPredictor< Network, EdgeRndIt, ScoreRndIt, EdgeRndOutIt >::operator=
(
    UPATPredictor< Network, EdgeRndIt, ScoreRndIt, EdgeRndOutIt > const & that )
[default]
```

Copy assignment operator.

#### Parameters

|             |                     |
|-------------|---------------------|
| <i>that</i> | The object to copy. |
|-------------|---------------------|

### 9.132.3.5 predict()

```
template<typename Network = UNetwork<>, typename EdgeRndIt = typename std::vector<typename
Network::Edge>::const_iterator, typename ScoreRndIt = typename std::vector<double>::iterator,
typename EdgeRndOutIt = typename std::vector<typename Network::Edge>::iterator>
virtual void LinkPred::UPATPredictor< Network, EdgeRndIt, ScoreRndIt, EdgeRndOutIt >::predict
(
    EdgeRndIt begin,
    EdgeRndIt end,
    ScoreRndIt scores ) [virtual]
```

Predict the links.

#### Parameters

|               |                                         |
|---------------|-----------------------------------------|
| <i>begin</i>  | Beginning of the links to be predicted. |
| <i>end</i>    | end of the links to be predicted.       |
| <i>scores</i> | Beginning of scores.                    |

Reimplemented from [LinkPred::ULPredictor< UNetwork<>, typename std::vector< typename UNetwork<> ::Edge >::const\\_iterator](#)

### 9.132.3.6 score()

```
template<typename Network = UNetwork<>, typename EdgeRndIt = typename std::vector<typename
Network::Edge>::const_iterator, typename ScoreRndIt = typename std::vector<double>::iterator,
typename EdgeRndOutIt = typename std::vector<typename Network::Edge>::iterator>
virtual double LinkPred::UPATPredictor< Network, EdgeRndIt, ScoreRndIt, EdgeRndOutIt >::score
(
    Edge const & e ) [inline], [virtual]
```

Compute the score of a single edge.

#### Parameters

|          |           |
|----------|-----------|
| <i>e</i> | The edge. |
|----------|-----------|

#### Returns

The score of e.

### 9.132.3.7 top()

```
template<typename Network = UNetwork<>, typename EdgeRndIt = typename std::vector<typename
Network::Edge>::const_iterator, typename ScoreRndIt = typename std::vector<double>::iterator,
typename EdgeRndOutIt = typename std::vector<typename Network::Edge>::iterator>
```

```
virtual std::size_t LinkPred::UPATPredictor< Network, EdgeRndIt, ScoreRndIt, EdgeRndOutIt >↵
::top (
    std::size_t k,
    EdgeRndOutIt eit,
    ScoreRndIt sit ) [inline], [virtual]
```

Finds the k negative edges with the top score. Ties are broken randomly.

#### Parameters

|            |                                                                                                         |
|------------|---------------------------------------------------------------------------------------------------------|
| <i>k</i>   | The number of edges to find.                                                                            |
| <i>eit</i> | An output iterator where the edges are written.                                                         |
| <i>sit</i> | An output iterator where the scores are written. The scores are written in the same order as the edges. |

#### Returns

The number of negative edges inserted. It is the minimum between k and the number of negative edges in the network.

Reimplemented from [LinkPred::ULPredictor< UNetwork<>, typename std::vector< typename UNetwork<> ::Edge >::const\\_iterator](#)

The documentation for this class was generated from the following file:

- [include/linkpred/predictors/undirected/upatpredictor.hpp](#)

## 9.133 LinkPred::UPSTPredictor< Network, EdgeRndIt, ScoreRndIt, EdgeRndOutIt > Class Template Reference

A link predictor that prestores edge scores. This allows to seemingly integrate results from external link prediction algorithms to [LinkPred](#) (for example, users may implement their own link prediction algorithm and then use this link predictor to use compare their results to algorithms available in [LinkPred](#)).

```
#include <upstpredictor.hpp>
```

Inheritance diagram for `LinkPred::UPSTPredictor< Network, EdgeRndIt, ScoreRndIt, EdgeRndOutIt >`:

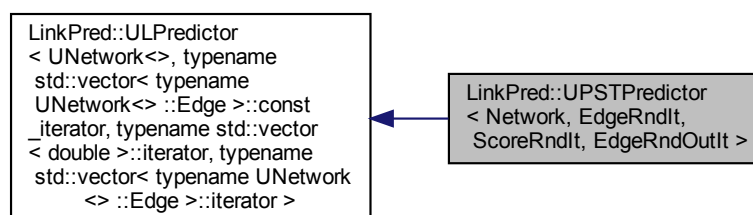

Collaboration diagram for LinkPred::UPSTPredictor< Network, EdgeRndIt, ScoreRndIt, EdgeRndOutIt >:

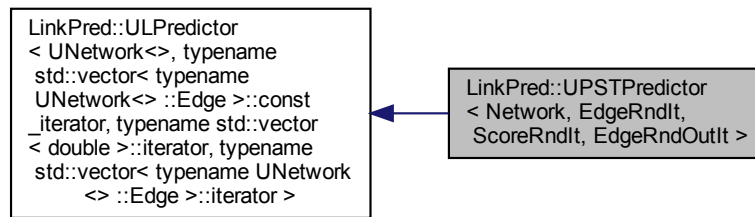

## Public Member Functions

- [UPSTPredictor](#) (std::shared\_ptr< [Network](#) const > net)
- [UPSTPredictor](#) ([UPSTPredictor](#) const &that)=default
- [UPSTPredictor](#) & [operator=](#) ([UPSTPredictor](#) const &that)=default
- [UPSTPredictor](#) ([UPSTPredictor](#) &&that)=default
- [UPSTPredictor](#) & [operator=](#) ([UPSTPredictor](#) &&that)=default
- void [setEdgeScores](#) (typename Network::template EdgeMapSP< double > edgeScores)
- void [loadEdgeScores](#) (std::string fileName)
- virtual void [init](#) ()
- virtual void [learn](#) ()
- virtual double [score](#) (Edge const &e)
- virtual [~UPSTPredictor](#) ()=default

## Additional Inherited Members

### 9.133.1 Detailed Description

```

template<typename Network = UNetwork<>, typename EdgeRndIt = typename std::vector<typename Network::Edge>::const_iterator,
typename ScoreRndIt = typename std::vector<double>::iterator, typename EdgeRndOutIt = typename std::vector<typename Network::Edge>::iterator>
class LinkPred::UPSTPredictor< Network, EdgeRndIt, ScoreRndIt, EdgeRndOutIt >
  
```

A link predictor that prestores edge scores. This allows to seemingly integrate results from external link prediction algorithms to [LinkPred](#) (for example, users may implement their own link prediction algorithm and then use this link predictor to use compare their results to algorithms available in [LinkPred](#)).

#### Template Parameters

|                              |                                                   |
|------------------------------|---------------------------------------------------|
| <i>Network</i>               | The network type.                                 |
| <i>Edge</i><br><i>RndIt</i>  | A random iterator type used to iterate on edges.  |
| <i>Score</i><br><i>RndIt</i> | A random iterator type used to iterate on scores. |

## 9.133.2 Constructor & Destructor Documentation

### 9.133.2.1 UPSTPredictor() [1/3]

```
template<typename Network = UNetwork<>, typename EdgeRndIt = typename std::vector<typename
Network::Edge>::const_iterator, typename ScoreRndIt = typename std::vector<double>::iterator,
typename EdgeRndOutIt = typename std::vector<typename Network::Edge>::iterator>
LinkPred::UPSTPredictor< Network, EdgeRndIt, ScoreRndIt, EdgeRndOutIt >::UPSTPredictor (
    std::shared_ptr< Network const > net ) [inline]
```

#### Parameters

|            |              |
|------------|--------------|
| <i>net</i> | The network. |
|------------|--------------|

### 9.133.2.2 UPSTPredictor() [2/3]

```
template<typename Network = UNetwork<>, typename EdgeRndIt = typename std::vector<typename
Network::Edge>::const_iterator, typename ScoreRndIt = typename std::vector<double>::iterator,
typename EdgeRndOutIt = typename std::vector<typename Network::Edge>::iterator>
LinkPred::UPSTPredictor< Network, EdgeRndIt, ScoreRndIt, EdgeRndOutIt >::UPSTPredictor (
    UPSTPredictor< Network, EdgeRndIt, ScoreRndIt, EdgeRndOutIt > const & that )
[default]
```

Copy constructor.

#### Parameters

|             |                     |
|-------------|---------------------|
| <i>that</i> | The object to copy. |
|-------------|---------------------|

### 9.133.2.3 UPSTPredictor() [3/3]

```
template<typename Network = UNetwork<>, typename EdgeRndIt = typename std::vector<typename
Network::Edge>::const_iterator, typename ScoreRndIt = typename std::vector<double>::iterator,
typename EdgeRndOutIt = typename std::vector<typename Network::Edge>::iterator>
LinkPred::UPSTPredictor< Network, EdgeRndIt, ScoreRndIt, EdgeRndOutIt >::UPSTPredictor (
    UPSTPredictor< Network, EdgeRndIt, ScoreRndIt, EdgeRndOutIt > && that ) [default]
```

Move constructor.

#### Parameters

|             |                     |
|-------------|---------------------|
| <i>that</i> | The object to move. |
|-------------|---------------------|



#### 9.133.2.4 ~UPSTPredictor()

```
template<typename Network = UNetwork<>, typename EdgeRndIt = typename std::vector<typename
Network::Edge>::const_iterator, typename ScoreRndIt = typename std::vector<double>::iterator,
typename EdgeRndOutIt = typename std::vector<typename Network::Edge>::iterator>
virtual LinkPred::UPSTPredictor< Network, EdgeRndIt, ScoreRndIt, EdgeRndOutIt >::~~UPSTPredictor
( ) [virtual], [default]
```

Destructor.

### 9.133.3 Member Function Documentation

#### 9.133.3.1 init()

```
template<typename Network = UNetwork<>, typename EdgeRndIt = typename std::vector<typename
Network::Edge>::const_iterator, typename ScoreRndIt = typename std::vector<double>::iterator,
typename EdgeRndOutIt = typename std::vector<typename Network::Edge>::iterator>
virtual void LinkPred::UPSTPredictor< Network, EdgeRndIt, ScoreRndIt, EdgeRndOutIt >::init ( )
[inline], [virtual]
```

Initialize the solver.

Implements [LinkPred::ULPredictor< UNetwork<>, typename std::vector< typename UNetwork<> ::Edge >::const\\_iterator, typena](#)

#### 9.133.3.2 learn()

```
template<typename Network = UNetwork<>, typename EdgeRndIt = typename std::vector<typename
Network::Edge>::const_iterator, typename ScoreRndIt = typename std::vector<double>::iterator,
typename EdgeRndOutIt = typename std::vector<typename Network::Edge>::iterator>
virtual void LinkPred::UPSTPredictor< Network, EdgeRndIt, ScoreRndIt, EdgeRndOutIt >::learn (
) [inline], [virtual]
```

Learn.

Implements [LinkPred::ULPredictor< UNetwork<>, typename std::vector< typename UNetwork<> ::Edge >::const\\_iterator, typena](#)

#### 9.133.3.3 loadEdgeScores()

```
template<typename Network = UNetwork<>, typename EdgeRndIt = typename std::vector<typename
Network::Edge>::const_iterator, typename ScoreRndIt = typename std::vector<double>::iterator,
typename EdgeRndOutIt = typename std::vector<typename Network::Edge>::iterator>
void LinkPred::UPSTPredictor< Network, EdgeRndIt, ScoreRndIt, EdgeRndOutIt >::loadEdgeScores (
    std::string fileName )
```

Load edge scores from file. This file should contain the scores of all non-exisitng links of net.

## Parameters

|                 |                                                                                                                                                                                                                                                                                                                                                                                                                                       |
|-----------------|---------------------------------------------------------------------------------------------------------------------------------------------------------------------------------------------------------------------------------------------------------------------------------------------------------------------------------------------------------------------------------------------------------------------------------------|
| <i>fileName</i> | The name of the file containing edge scores. This should be a text file in which each line contains three columns separate by a space character (one or multiple spaces or tabs). The first two columns contain the labels (not the internal IDs) of two nodes composing the edge. The third column contains the score. For example: A B 0.35 or: 5 8 2.6 All node labels that appear in this file must already exist in the network. |
|-----------------|---------------------------------------------------------------------------------------------------------------------------------------------------------------------------------------------------------------------------------------------------------------------------------------------------------------------------------------------------------------------------------------------------------------------------------------|

**9.133.3.4 operator=()** [1/2]

```
template<typename Network = UNetwork<>, typename EdgeRndIt = typename std::vector<typename
Network::Edge>::const_iterator, typename ScoreRndIt = typename std::vector<double>::iterator,
typename EdgeRndOutIt = typename std::vector<typename Network::Edge>::iterator>
UPSTPredictor& LinkPred::UPSTPredictor< Network, EdgeRndIt, ScoreRndIt, EdgeRndOutIt >::operator=
(
    UPSTPredictor< Network, EdgeRndIt, ScoreRndIt, EdgeRndOutIt > && that ) [default]
```

Move assignment operator.

## Parameters

|             |                     |
|-------------|---------------------|
| <i>that</i> | The object to move. |
|-------------|---------------------|

**9.133.3.5 operator=()** [2/2]

```
template<typename Network = UNetwork<>, typename EdgeRndIt = typename std::vector<typename
Network::Edge>::const_iterator, typename ScoreRndIt = typename std::vector<double>::iterator,
typename EdgeRndOutIt = typename std::vector<typename Network::Edge>::iterator>
UPSTPredictor& LinkPred::UPSTPredictor< Network, EdgeRndIt, ScoreRndIt, EdgeRndOutIt >::operator=
(
    UPSTPredictor< Network, EdgeRndIt, ScoreRndIt, EdgeRndOutIt > const & that )
[default]
```

Copy assignment operator.

## Parameters

|             |                     |
|-------------|---------------------|
| <i>that</i> | The object to copy. |
|-------------|---------------------|

**9.133.3.6 score()**

```
template<typename Network = UNetwork<>, typename EdgeRndIt = typename std::vector<typename
Network::Edge>::const_iterator, typename ScoreRndIt = typename std::vector<double>::iterator,
```

```

typename EdgeRndOutIt = typename std::vector<typename Network::Edge>::iterator>
virtual double LinkPred::UPSTPredictor< Network, EdgeRndIt, ScoreRndIt, EdgeRndOutIt >::score
(
    Edge const & e ) [virtual]

```

Compute the score of a single edge.

#### Parameters

|          |           |
|----------|-----------|
| <i>e</i> | The edge. |
|----------|-----------|

#### Returns

The score of *e*.

#### 9.133.3.7 setEdgeScores()

```

template<typename Network = UNetwork<>, typename EdgeRndIt = typename std::vector<typename
Network::Edge>::const_iterator, typename ScoreRndIt = typename std::vector<double>::iterator,
typename EdgeRndOutIt = typename std::vector<typename Network::Edge>::iterator>
void LinkPred::UPSTPredictor< Network, EdgeRndIt, ScoreRndIt, EdgeRndOutIt >::setEdgeScores (
    typename Network::template EdgeMapSP< double > edgeScores ) [inline]

```

Set the edge scores. This should contain the scores of all non-existing links of net.

#### Parameters

|                   |                                                           |
|-------------------|-----------------------------------------------------------|
| <i>edgeScores</i> | A map containing the scores of non-existing links of net. |
|-------------------|-----------------------------------------------------------|

The documentation for this class was generated from the following file:

- include/linkpred/predictors/undirected/[upstp predictor.hpp](#)

## 9.134 LinkPred::URALPredictor< Network, EdgeRndIt, ScoreRndIt, EdgeRndOutIt > Class Template Reference

A resource allocation link predictor.

```
#include <uralpredictor.hpp>
```

Inheritance diagram for LinkPred::URALPredictor< Network, EdgeRndIt, ScoreRndIt, EdgeRndOutIt >:

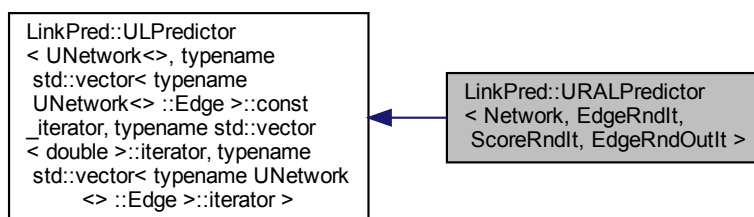

Collaboration diagram for LinkPred::URALPredictor< Network, EdgeRndIt, ScoreRndIt, EdgeRndOutIt >:

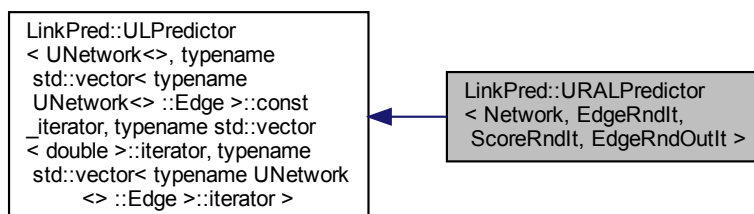

## Public Member Functions

- `URALPredictor` (`std::shared_ptr< Network const > net`)
- `URALPredictor` (`URALPredictor const &that`)=default
- `URALPredictor & operator=` (`URALPredictor const &that`)=default
- `URALPredictor` (`URALPredictor &&that`)=default
- `URALPredictor & operator=` (`URALPredictor &&that`)=default
- virtual void `init` ()
- virtual void `learn` ()
- virtual double `score` (`Edge const &e`)
- virtual void `predict` (`EdgeRndIt begin`, `EdgeRndIt end`, `ScoreRndIt scores`)
- virtual `std::size_t top` (`std::size_t k`, `EdgeRndOutIt eit`, `ScoreRndIt sit`)
- virtual `~URALPredictor` ()=default

## Additional Inherited Members

### 9.134.1 Detailed Description

```

template<typename Network = UNetwork<>, typename EdgeRndIt = typename std::vector<typename Network::Edge>::const_iterator,
        typename ScoreRndIt = typename std::vector<double>::iterator, typename EdgeRndOutIt = typename std::vector<typename Network::Edge>::iterator>
class LinkPred::URALPredictor< Network, EdgeRndIt, ScoreRndIt, EdgeRndOutIt >

```

A resource allocation link predictor.

## Template Parameters

|                         |                                                   |
|-------------------------|---------------------------------------------------|
| <i>Network</i>          | The network type.                                 |
| <i>Edge↔<br/>RndIt</i>  | A random iterator type used to iterate on edges.  |
| <i>Score↔<br/>RndIt</i> | A random iterator type used to iterate on scores. |

## 9.134.2 Constructor &amp; Destructor Documentation

## 9.134.2.1 URALPredictor() [1/3]

```
template<typename Network = UNetwork<>, typename EdgeRndIt = typename std::vector<typename
Network::Edge>::const_iterator, typename ScoreRndIt = typename std::vector<double>::iterator,
typename EdgeRndOutIt = typename std::vector<typename Network::Edge>::iterator>
LinkPred::URALPredictor< Network, EdgeRndIt, ScoreRndIt, EdgeRndOutIt >::URALPredictor (
    std::shared_ptr< Network const > net ) [inline]
```

## Parameters

|            |              |
|------------|--------------|
| <i>net</i> | The network. |
|------------|--------------|

## 9.134.2.2 URALPredictor() [2/3]

```
template<typename Network = UNetwork<>, typename EdgeRndIt = typename std::vector<typename
Network::Edge>::const_iterator, typename ScoreRndIt = typename std::vector<double>::iterator,
typename EdgeRndOutIt = typename std::vector<typename Network::Edge>::iterator>
LinkPred::URALPredictor< Network, EdgeRndIt, ScoreRndIt, EdgeRndOutIt >::URALPredictor (
    URALPredictor< Network, EdgeRndIt, ScoreRndIt, EdgeRndOutIt > const & that )
[default]
```

Copy constructor.

## Parameters

|             |                     |
|-------------|---------------------|
| <i>that</i> | The object to copy. |
|-------------|---------------------|

## 9.134.2.3 URALPredictor() [3/3]

```
template<typename Network = UNetwork<>, typename EdgeRndIt = typename std::vector<typename
Network::Edge>::const_iterator, typename ScoreRndIt = typename std::vector<double>::iterator,
```

```
typename EdgeRndOutIt = typename std::vector<typename Network::Edge>::iterator>
LinkPred::URALPredictor< Network, EdgeRndIt, ScoreRndIt, EdgeRndOutIt >::URALPredictor (
    URALPredictor< Network, EdgeRndIt, ScoreRndIt, EdgeRndOutIt > && that ) [default]
```

Move constructor.

#### Parameters

|             |                     |
|-------------|---------------------|
| <i>that</i> | The object to move. |
|-------------|---------------------|

### 9.134.2.4 ~URALPredictor()

```
template<typename Network = UNetwork<>, typename EdgeRndIt = typename std::vector<typename
Network::Edge>::const_iterator, typename ScoreRndIt = typename std::vector<double>::iterator,
typename EdgeRndOutIt = typename std::vector<typename Network::Edge>::iterator>
virtual LinkPred::URALPredictor< Network, EdgeRndIt, ScoreRndIt, EdgeRndOutIt >::~~URALPredictor
( ) [virtual], [default]
```

Destructor.

## 9.134.3 Member Function Documentation

### 9.134.3.1 init()

```
template<typename Network = UNetwork<>, typename EdgeRndIt = typename std::vector<typename
Network::Edge>::const_iterator, typename ScoreRndIt = typename std::vector<double>::iterator,
typename EdgeRndOutIt = typename std::vector<typename Network::Edge>::iterator>
virtual void LinkPred::URALPredictor< Network, EdgeRndIt, ScoreRndIt, EdgeRndOutIt >::init ( )
[inline], [virtual]
```

Initialize the predictor.

Implements [LinkPred::ULPredictor< UNetwork<>, typename std::vector< typename UNetwork<> ::Edge >::const\\_iterator, typena](#)

### 9.134.3.2 learn()

```
template<typename Network = UNetwork<>, typename EdgeRndIt = typename std::vector<typename
Network::Edge>::const_iterator, typename ScoreRndIt = typename std::vector<double>::iterator,
typename EdgeRndOutIt = typename std::vector<typename Network::Edge>::iterator>
virtual void LinkPred::URALPredictor< Network, EdgeRndIt, ScoreRndIt, EdgeRndOutIt >::learn (
) [inline], [virtual]
```

Learning.

Implements [LinkPred::ULPredictor< UNetwork<>, typename std::vector< typename UNetwork<> ::Edge >::const\\_iterator, typena](#)

**9.134.3.3 operator=()** [1/2]

```
template<typename Network = UNetwork<>, typename EdgeRndIt = typename std::vector<typename
Network::Edge>::const_iterator, typename ScoreRndIt = typename std::vector<double>::iterator,
typename EdgeRndOutIt = typename std::vector<typename Network::Edge>::iterator>
URALPredictor& LinkPred::URALPredictor< Network, EdgeRndIt, ScoreRndIt, EdgeRndOutIt >::operator=
(
    URALPredictor< Network, EdgeRndIt, ScoreRndIt, EdgeRndOutIt > && that ) [default]
```

Move assignment operator.

**Parameters**

|             |                     |
|-------------|---------------------|
| <i>that</i> | The object to move. |
|-------------|---------------------|

**9.134.3.4 operator=()** [2/2]

```
template<typename Network = UNetwork<>, typename EdgeRndIt = typename std::vector<typename
Network::Edge>::const_iterator, typename ScoreRndIt = typename std::vector<double>::iterator,
typename EdgeRndOutIt = typename std::vector<typename Network::Edge>::iterator>
URALPredictor& LinkPred::URALPredictor< Network, EdgeRndIt, ScoreRndIt, EdgeRndOutIt >::operator=
(
    URALPredictor< Network, EdgeRndIt, ScoreRndIt, EdgeRndOutIt > const & that )
[default]
```

Copy assignment operator.

**Parameters**

|             |                     |
|-------------|---------------------|
| <i>that</i> | The object to copy. |
|-------------|---------------------|

**9.134.3.5 predict()**

```
template<typename Network = UNetwork<>, typename EdgeRndIt = typename std::vector<typename
Network::Edge>::const_iterator, typename ScoreRndIt = typename std::vector<double>::iterator,
typename EdgeRndOutIt = typename std::vector<typename Network::Edge>::iterator>
virtual void LinkPred::URALPredictor< Network, EdgeRndIt, ScoreRndIt, EdgeRndOutIt >::predict
(
    EdgeRndIt begin,
    EdgeRndIt end,
    ScoreRndIt scores ) [virtual]
```

Predict the links.

**Parameters**

|               |                                         |
|---------------|-----------------------------------------|
| <i>begin</i>  | Beginning of the links to be predicted. |
| <i>end</i>    | end of the links to be predicted.       |
| <i>scores</i> | Beginning of scores.                    |

Reimplemented from [LinkPred::ULPredictor< UNetwork<>, typename std::vector< typename UNetwork<> ::Edge >::const\\_iterator](#)

### 9.134.3.6 score()

```
template<typename Network = UNetwork<>, typename EdgeRndIt = typename std::vector<typename
Network::Edge>::const_iterator, typename ScoreRndIt = typename std::vector<double>::iterator,
typename EdgeRndOutIt = typename std::vector<typename Network::Edge>::iterator>
virtual double LinkPred::URALPredictor< Network, EdgeRndIt, ScoreRndIt, EdgeRndOutIt >::score
(
    Edge const & e ) [inline], [virtual]
```

Compute the score of a single edge.

#### Parameters

|          |           |
|----------|-----------|
| <i>e</i> | The edge. |
|----------|-----------|

#### Returns

The score of *e*.

### 9.134.3.7 top()

```
template<typename Network = UNetwork<>, typename EdgeRndIt = typename std::vector<typename
Network::Edge>::const_iterator, typename ScoreRndIt = typename std::vector<double>::iterator,
typename EdgeRndOutIt = typename std::vector<typename Network::Edge>::iterator>
virtual std::size_t LinkPred::URALPredictor< Network, EdgeRndIt, ScoreRndIt, EdgeRndOutIt >↔
::top (
    std::size_t k,
    EdgeRndOutIt eit,
    ScoreRndIt sit ) [virtual]
```

Finds the *k* negative edges with the top score. Ties are broken randmly.

#### Parameters

|            |                                                                                                         |
|------------|---------------------------------------------------------------------------------------------------------|
| <i>k</i>   | The number of edges to find.                                                                            |
| <i>eit</i> | An output iterator where the edges are written.                                                         |
| <i>sit</i> | An output iterator where the scores are written. The scores are written in the same order as the edges. |

#### Returns

The number of negative edges inserted. It is the minimum between *k* and the number of negative edges in the network.

Reimplemented from [LinkPred::ULPredictor< UNetwork<>, typename std::vector< typename UNetwork<> ::Edge >::const\\_iterator](#)

The documentation for this class was generated from the following file:



- [include/linkpred/predictors/undirected/urandpredictor.hpp](#)

## 9.135 LinkPred::URNDPredictor< Network, EdgeRndIt, ScoreRndIt, EdgeRndOutIt > Class Template Reference

A random link predictor.

```
#include <urndpredictor.hpp>
```

Inheritance diagram for LinkPred::URNDPredictor< Network, EdgeRndIt, ScoreRndIt, EdgeRndOutIt >:

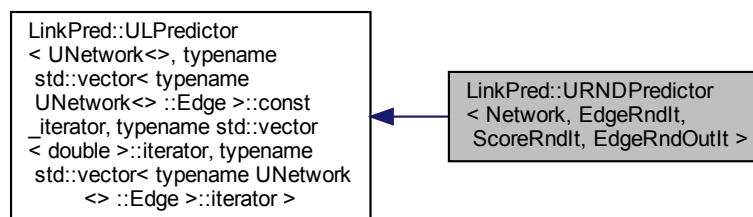

Collaboration diagram for LinkPred::URNDPredictor< Network, EdgeRndIt, ScoreRndIt, EdgeRndOutIt >:

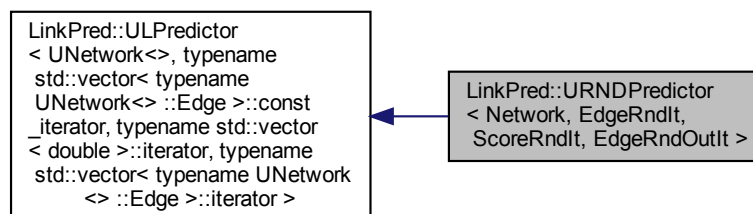

### Public Member Functions

- [URNDPredictor](#) (std::shared\_ptr< [Network](#) const > net, long int seed)
- [URNDPredictor](#) ([URNDPredictor](#) const &that)=default
- [URNDPredictor](#) & [operator=](#) ([URNDPredictor](#) const &that)=default
- [URNDPredictor](#) ([URNDPredictor](#) &&that)=default
- [URNDPredictor](#) & [operator=](#) ([URNDPredictor](#) &&that)=default
- virtual void [init](#) ()
- virtual void [learn](#) ()
- virtual void [predict](#) ([EdgeRndIt](#) begin, [EdgeRndIt](#) end, [ScoreRndIt](#) scores)
- virtual double [score](#) ([Edge](#) const &e)
- virtual [~URNDPredictor](#) ()=default

## Additional Inherited Members

### 9.135.1 Detailed Description

```
template<typename Network = UNetwork<>, typename EdgeRndIt = typename std::vector<typename Network::Edge>::const_iterator,
typename ScoreRndIt = typename std::vector<double>::iterator, typename EdgeRndOutIt = typename std::vector<typename Network::Edge>::iterator>
class LinkPred::URNDPredictor< Network, EdgeRndIt, ScoreRndIt, EdgeRndOutIt >
```

A random link predictor.

#### Template Parameters

|                   |                                                   |
|-------------------|---------------------------------------------------|
| <i>Network</i>    | The network type.                                 |
| <i>EdgeRndIt</i>  | A random iterator type used to iterate on edges.  |
| <i>ScoreRndIt</i> | A random iterator type used to iterate on scores. |

### 9.135.2 Constructor & Destructor Documentation

#### 9.135.2.1 URNDPredictor() [1/3]

```
template<typename Network = UNetwork<>, typename EdgeRndIt = typename std::vector<typename
Network::Edge>::const_iterator, typename ScoreRndIt = typename std::vector<double>::iterator,
typename EdgeRndOutIt = typename std::vector<typename Network::Edge>::iterator>
LinkPred::URNDPredictor< Network, EdgeRndIt, ScoreRndIt, EdgeRndOutIt >::URNDPredictor (
    std::shared_ptr< Network > const > net,
    long int seed ) [inline]
```

#### Parameters

|             |                                     |
|-------------|-------------------------------------|
| <i>net</i>  | The network.                        |
| <i>seed</i> | The random number generator's seed. |

#### 9.135.2.2 URNDPredictor() [2/3]

```
template<typename Network = UNetwork<>, typename EdgeRndIt = typename std::vector<typename
Network::Edge>::const_iterator, typename ScoreRndIt = typename std::vector<double>::iterator,
typename EdgeRndOutIt = typename std::vector<typename Network::Edge>::iterator>
LinkPred::URNDPredictor< Network, EdgeRndIt, ScoreRndIt, EdgeRndOutIt >::URNDPredictor (
    URNDPredictor< Network, EdgeRndIt, ScoreRndIt, EdgeRndOutIt > const & that )
[default]
```

Copy constructor.

## Parameters

|             |                     |
|-------------|---------------------|
| <i>that</i> | The object to copy. |
|-------------|---------------------|

## 9.135.2.3 URNDPredictor() [3/3]

```
template<typename Network = UNetwork<>, typename EdgeRndIt = typename std::vector<typename
Network::Edge>::const_iterator, typename ScoreRndIt = typename std::vector<double>::iterator,
typename EdgeRndOutIt = typename std::vector<typename Network::Edge>::iterator>
LinkPred::URNDPredictor< Network, EdgeRndIt, ScoreRndIt, EdgeRndOutIt >::URNDPredictor (
    URNDPredictor< Network, EdgeRndIt, ScoreRndIt, EdgeRndOutIt > && that ) [default]
```

Move constructor.

## Parameters

|             |                     |
|-------------|---------------------|
| <i>that</i> | The object to move. |
|-------------|---------------------|

## 9.135.2.4 ~URNDPredictor()

```
template<typename Network = UNetwork<>, typename EdgeRndIt = typename std::vector<typename
Network::Edge>::const_iterator, typename ScoreRndIt = typename std::vector<double>::iterator,
typename EdgeRndOutIt = typename std::vector<typename Network::Edge>::iterator>
virtual LinkPred::URNDPredictor< Network, EdgeRndIt, ScoreRndIt, EdgeRndOutIt >::~~URNDPredictor
( ) [virtual], [default]
```

Destructor.

## 9.135.3 Member Function Documentation

## 9.135.3.1 init()

```
template<typename Network = UNetwork<>, typename EdgeRndIt = typename std::vector<typename
Network::Edge>::const_iterator, typename ScoreRndIt = typename std::vector<double>::iterator,
typename EdgeRndOutIt = typename std::vector<typename Network::Edge>::iterator>
virtual void LinkPred::URNDPredictor< Network, EdgeRndIt, ScoreRndIt, EdgeRndOutIt >::init ( )
[inline], [virtual]
```

Initialize the solver.

Implements [LinkPred::ULPredictor< UNetwork<>, typename std::vector< typename UNetwork<> ::Edge >::const\\_iterator, typena](#)

### 9.135.3.2 learn()

```
template<typename Network = UNetwork<>, typename EdgeRndIt = typename std::vector<typename
Network::Edge>::const_iterator, typename ScoreRndIt = typename std::vector<double>::iterator,
typename EdgeRndOutIt = typename std::vector<typename Network::Edge>::iterator>
virtual void LinkPred::URNDPredictor< Network, EdgeRndIt, ScoreRndIt, EdgeRndOutIt >::learn (
) [inline], [virtual]
```

Learn.

Implements [LinkPred::ULPredictor< UNetwork<>, typename std::vector< typename UNetwork<> ::Edge >::const\\_iterator, typena](#)

### 9.135.3.3 operator=() [1/2]

```
template<typename Network = UNetwork<>, typename EdgeRndIt = typename std::vector<typename
Network::Edge>::const_iterator, typename ScoreRndIt = typename std::vector<double>::iterator,
typename EdgeRndOutIt = typename std::vector<typename Network::Edge>::iterator>
URNDPredictor& LinkPred::URNDPredictor< Network, EdgeRndIt, ScoreRndIt, EdgeRndOutIt >::operator=
(
    URNDPredictor< Network, EdgeRndIt, ScoreRndIt, EdgeRndOutIt > && that ) [default]
```

Move assignment operator.

#### Parameters

|             |                     |
|-------------|---------------------|
| <i>that</i> | The object to move. |
|-------------|---------------------|

### 9.135.3.4 operator=() [2/2]

```
template<typename Network = UNetwork<>, typename EdgeRndIt = typename std::vector<typename
Network::Edge>::const_iterator, typename ScoreRndIt = typename std::vector<double>::iterator,
typename EdgeRndOutIt = typename std::vector<typename Network::Edge>::iterator>
URNDPredictor& LinkPred::URNDPredictor< Network, EdgeRndIt, ScoreRndIt, EdgeRndOutIt >::operator=
(
    URNDPredictor< Network, EdgeRndIt, ScoreRndIt, EdgeRndOutIt > const & that )
[default]
```

Copy assignment operator.

#### Parameters

|             |                     |
|-------------|---------------------|
| <i>that</i> | The object to copy. |
|-------------|---------------------|

### 9.135.3.5 predict()

```
template<typename Network = UNetwork<>, typename EdgeRndIt = typename std::vector<typename
Network::Edge>::const_iterator, typename ScoreRndIt = typename std::vector<double>::iterator,
typename EdgeRndOutIt = typename std::vector<typename Network::Edge>::iterator>
virtual void LinkPred::URNDPredictor< Network, EdgeRndIt, ScoreRndIt, EdgeRndOutIt >::predict
(
    EdgeRndIt begin,
    EdgeRndIt end,
    ScoreRndIt scores ) [virtual]
```

Predict the links.

#### Parameters

|               |                                         |
|---------------|-----------------------------------------|
| <i>begin</i>  | Beginning of the links to be predicted. |
| <i>end</i>    | end of the links to be predicted.       |
| <i>scores</i> | Beginning of scores.                    |

Reimplemented from [LinkPred::ULPredictor< UNetwork<>, typename std::vector< typename UNetwork<> ::Edge >::const\\_iterator](#)

### 9.135.3.6 score()

```
template<typename Network = UNetwork<>, typename EdgeRndIt = typename std::vector<typename
Network::Edge>::const_iterator, typename ScoreRndIt = typename std::vector<double>::iterator,
typename EdgeRndOutIt = typename std::vector<typename Network::Edge>::iterator>
virtual double LinkPred::URNDPredictor< Network, EdgeRndIt, ScoreRndIt, EdgeRndOutIt >::score
(
    Edge const & e ) [virtual]
```

Compute the score of a single edge.

#### Parameters

|          |           |
|----------|-----------|
| <i>e</i> | The edge. |
|----------|-----------|

#### Returns

The score of e.

The documentation for this class was generated from the following file:

- [include/linkpred/predictors/undirected/urndpredictor.hpp](#)

## 9.136 LinkPred::USAI Predictor< Network, EdgeRndIt, ScoreRndIt, EdgeRndOutIt > Class Template Reference

A Salton index link predictor.

```
#include <usaipredictor.hpp>
```

Inheritance diagram for LinkPred::USAIPredictor< Network, EdgeRndIt, ScoreRndIt, EdgeRndOutIt >:

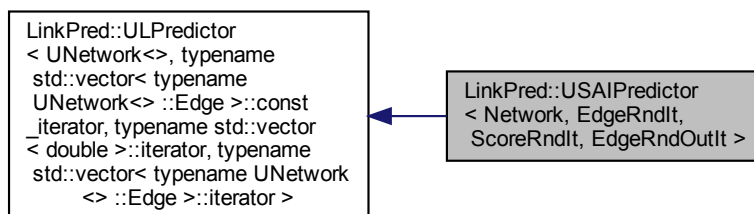

Collaboration diagram for LinkPred::USAIPredictor< Network, EdgeRndIt, ScoreRndIt, EdgeRndOutIt >:

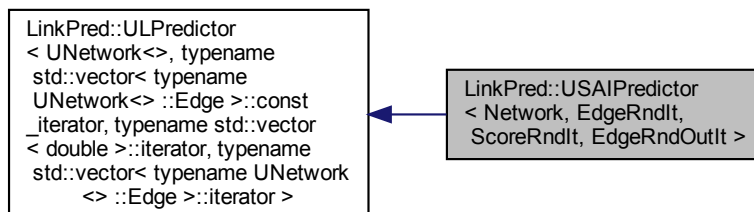

## Public Member Functions

- [USAIPredictor](#) (std::shared\_ptr< [Network](#) const > net)
- [USAIPredictor](#) ([USAIPredictor](#) const &that)=default
- [USAIPredictor](#) & operator= ([USAIPredictor](#) const &that)=default
- [USAIPredictor](#) ([USAIPredictor](#) &&that)=default
- [USAIPredictor](#) & operator= ([USAIPredictor](#) &&that)=default
- virtual void [init](#) ()
- virtual void [learn](#) ()
- virtual double [score](#) (Edge const &e)
- virtual void [predict](#) ([EdgeRndIt](#) begin, [EdgeRndIt](#) end, [ScoreRndIt](#) scores)
- virtual std::size\_t [top](#) (std::size\_t k, [EdgeRndOutIt](#) eit, [ScoreRndIt](#) sit)
- virtual [~USAIPredictor](#) ()=default



## Template Parameters

|                                |                                                   |
|--------------------------------|---------------------------------------------------|
| <i>Network</i>                 | The network type.                                 |
| <i>Edge</i> ↔<br><i>RndIt</i>  | A random iterator type used to iterate on edges.  |
| <i>Score</i> ↔<br><i>RndIt</i> | A random iterator type used to iterate on scores. |

## 9.136.2 Constructor &amp; Destructor Documentation

## 9.136.2.1 USAIPredictor() [1/3]

```
template<typename Network = UNetwork<>, typename EdgeRndIt = typename std::vector<typename
Network::Edge>::const_iterator, typename ScoreRndIt = typename std::vector<double>::iterator,
typename EdgeRndOutIt = typename std::vector<typename Network::Edge>::iterator>
LinkPred::USAIPredictor< Network, EdgeRndIt, ScoreRndIt, EdgeRndOutIt >::USAIPredictor (
    std::shared_ptr< Network const > net ) [inline]
```

## Parameters

|            |              |
|------------|--------------|
| <i>net</i> | The network. |
|------------|--------------|

## 9.136.2.2 USAIPredictor() [2/3]

```
template<typename Network = UNetwork<>, typename EdgeRndIt = typename std::vector<typename
Network::Edge>::const_iterator, typename ScoreRndIt = typename std::vector<double>::iterator,
typename EdgeRndOutIt = typename std::vector<typename Network::Edge>::iterator>
LinkPred::USAIPredictor< Network, EdgeRndIt, ScoreRndIt, EdgeRndOutIt >::USAIPredictor (
    USAIPredictor< Network, EdgeRndIt, ScoreRndIt, EdgeRndOutIt > const & that )
[default]
```

Copy constructor.

## Parameters

|             |                     |
|-------------|---------------------|
| <i>that</i> | The object to copy. |
|-------------|---------------------|

## 9.136.2.3 USAIPredictor() [3/3]

```
template<typename Network = UNetwork<>, typename EdgeRndIt = typename std::vector<typename
Network::Edge>::const_iterator, typename ScoreRndIt = typename std::vector<double>::iterator,
```



```
typename EdgeRndOutIt = typename std::vector<typename Network::Edge>::iterator>
LinkPred::USAIPredictor< Network, EdgeRndIt, ScoreRndIt, EdgeRndOutIt >::USAIPredictor (
    USAIPredictor< Network, EdgeRndIt, ScoreRndIt, EdgeRndOutIt > && that ) [default]
```

Move constructor.

#### Parameters

|             |                     |
|-------------|---------------------|
| <i>that</i> | The object to move. |
|-------------|---------------------|

### 9.136.2.4 ~USAIPredictor()

```
template<typename Network = UNetwork<>, typename EdgeRndIt = typename std::vector<typename
Network::Edge>::const_iterator, typename ScoreRndIt = typename std::vector<double>::iterator,
typename EdgeRndOutIt = typename std::vector<typename Network::Edge>::iterator>
virtual LinkPred::USAIPredictor< Network, EdgeRndIt, ScoreRndIt, EdgeRndOutIt >::~~USAIPredictor
( ) [virtual], [default]
```

Destructor.

## 9.136.3 Member Function Documentation

### 9.136.3.1 init()

```
template<typename Network = UNetwork<>, typename EdgeRndIt = typename std::vector<typename
Network::Edge>::const_iterator, typename ScoreRndIt = typename std::vector<double>::iterator,
typename EdgeRndOutIt = typename std::vector<typename Network::Edge>::iterator>
virtual void LinkPred::USAIPredictor< Network, EdgeRndIt, ScoreRndIt, EdgeRndOutIt >::init ( )
[inline], [virtual]
```

Initialize the predictor.

Implements [LinkPred::ULPredictor< UNetwork<>, typename std::vector< typename UNetwork<> ::Edge >::const\\_iterator, typena](#)

### 9.136.3.2 learn()

```
template<typename Network = UNetwork<>, typename EdgeRndIt = typename std::vector<typename
Network::Edge>::const_iterator, typename ScoreRndIt = typename std::vector<double>::iterator,
typename EdgeRndOutIt = typename std::vector<typename Network::Edge>::iterator>
virtual void LinkPred::USAIPredictor< Network, EdgeRndIt, ScoreRndIt, EdgeRndOutIt >::learn (
) [inline], [virtual]
```

Learning.

Implements [LinkPred::ULPredictor< UNetwork<>, typename std::vector< typename UNetwork<> ::Edge >::const\\_iterator, typena](#)

### 9.136.3.3 operator=() [1/2]

```
template<typename Network = UNetwork<>, typename EdgeRndIt = typename std::vector<typename
Network::Edge>::const_iterator, typename ScoreRndIt = typename std::vector<double>::iterator,
typename EdgeRndOutIt = typename std::vector<typename Network::Edge>::iterator>
USAIPredictor& LinkPred::USAIPredictor< Network, EdgeRndIt, ScoreRndIt, EdgeRndOutIt >::operator=
(
    USAIPredictor< Network, EdgeRndIt, ScoreRndIt, EdgeRndOutIt > && that ) [default]
```

Move assignment operator.

#### Parameters

|             |                     |
|-------------|---------------------|
| <i>that</i> | The object to move. |
|-------------|---------------------|

### 9.136.3.4 operator=() [2/2]

```
template<typename Network = UNetwork<>, typename EdgeRndIt = typename std::vector<typename
Network::Edge>::const_iterator, typename ScoreRndIt = typename std::vector<double>::iterator,
typename EdgeRndOutIt = typename std::vector<typename Network::Edge>::iterator>
USAIPredictor& LinkPred::USAIPredictor< Network, EdgeRndIt, ScoreRndIt, EdgeRndOutIt >::operator=
(
    USAIPredictor< Network, EdgeRndIt, ScoreRndIt, EdgeRndOutIt > const & that )
[default]
```

Copy assignment operator.

#### Parameters

|             |                     |
|-------------|---------------------|
| <i>that</i> | The object to copy. |
|-------------|---------------------|

### 9.136.3.5 predict()

```
template<typename Network = UNetwork<>, typename EdgeRndIt = typename std::vector<typename
Network::Edge>::const_iterator, typename ScoreRndIt = typename std::vector<double>::iterator,
typename EdgeRndOutIt = typename std::vector<typename Network::Edge>::iterator>
virtual void LinkPred::USAIPredictor< Network, EdgeRndIt, ScoreRndIt, EdgeRndOutIt >::predict
(
    EdgeRndIt begin,
    EdgeRndIt end,
    ScoreRndIt scores ) [virtual]
```

Predict the links.

#### Parameters

|               |                                         |
|---------------|-----------------------------------------|
| <i>begin</i>  | Beginning of the links to be predicted. |
| <i>end</i>    | end of the links to be predicted.       |
| <i>scores</i> | Beginning of scores.                    |

Reimplemented from [LinkPred::ULPredictor< UNetwork<>, typename std::vector< typename UNetwork<> ::Edge >::const\\_iterator](#)

### 9.136.3.6 score()

```
template<typename Network = UNetwork<>, typename EdgeRndIt = typename std::vector<typename
Network::Edge>::const_iterator, typename ScoreRndIt = typename std::vector<double>::iterator,
typename EdgeRndOutIt = typename std::vector<typename Network::Edge>::iterator>
virtual double LinkPred::USAI Predictor< Network, EdgeRndIt, ScoreRndIt, EdgeRndOutIt >::score
(
    Edge const & e ) [inline], [virtual]
```

Compute the score of a single edge.

#### Parameters

|          |           |
|----------|-----------|
| <i>e</i> | The edge. |
|----------|-----------|

#### Returns

The score of *e*.

### 9.136.3.7 top()

```
template<typename Network = UNetwork<>, typename EdgeRndIt = typename std::vector<typename
Network::Edge>::const_iterator, typename ScoreRndIt = typename std::vector<double>::iterator,
typename EdgeRndOutIt = typename std::vector<typename Network::Edge>::iterator>
virtual std::size_t LinkPred::USAI Predictor< Network, EdgeRndIt, ScoreRndIt, EdgeRndOutIt >↔
::top (
    std::size_t k,
    EdgeRndOutIt eit,
    ScoreRndIt sit ) [virtual]
```

Finds the *k* negative edges with the top score. Ties are broken randmly.

#### Parameters

|            |                                                                                                         |
|------------|---------------------------------------------------------------------------------------------------------|
| <i>k</i>   | The number of edges to find.                                                                            |
| <i>eit</i> | An output iterator where the edges are written.                                                         |
| <i>sit</i> | An output iterator where the scores are written. The scores are written in the same order as the edges. |

#### Returns

The number of negative edges inserted. It is the minimum between *k* and the number of negative edges in the network.

Reimplemented from [LinkPred::ULPredictor< UNetwork<>, typename std::vector< typename UNetwork<> ::Edge >::const\\_iterator](#)

The documentation for this class was generated from the following file:

- [include/linkpred/predictors/undirected/usaipredictor.hpp](#)

### 9.137 LinkPred::USBMPredictor< Network, EdgeRndIt, ScoreRndIt, EdgeRndOutIt > Class Template Reference

The stochastic block model link predictor.

```
#include <usbmpredictor.hpp>
```

Inheritance diagram for LinkPred::USBMPredictor< Network, EdgeRndIt, ScoreRndIt, EdgeRndOutIt >:

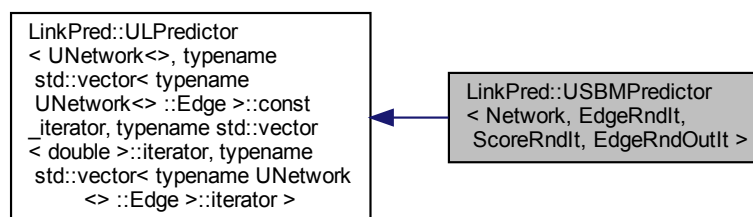

Collaboration diagram for LinkPred::USBMPredictor< Network, EdgeRndIt, ScoreRndIt, EdgeRndOutIt >:

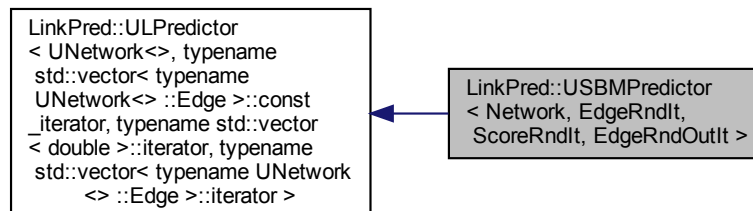

#### Public Member Functions

- `USBMPredictor` (`std::shared_ptr< Network const > net`, `long int seed`)
- `USBMPredictor` (`USBMPredictor const &that`)=`delete`
- `USBMPredictor & operator=` (`USBMPredictor const &that`)=`delete`
- `USBMPredictor` (`USBMPredictor &&that`)=`delete`
- `USBMPredictor & operator=` (`USBMPredictor &&that`)=`delete`
- virtual void `init` ()
- virtual void `learn` ()
- virtual double `score` (`Edge const &e`)
- virtual void `predict` (`EdgeRndIt begin`, `EdgeRndIt end`, `ScoreRndIt scores`)
- `std::size_t getMaxIter` () const
- void `setMaxIter` (`std::size_t maxIter`)
- virtual `~USBMPredictor` ()

## Additional Inherited Members

### 9.137.1 Detailed Description

```
template<typename Network = UNetwork<>, typename EdgeRndIt = typename std::vector<typename Network::Edge>::const_iterator,
typename ScoreRndIt = typename std::vector<double>::iterator, typename EdgeRndOutIt = typename std::vector<typename Network::Edge>::iterator>
class LinkPred::USBMPredictor< Network, EdgeRndIt, ScoreRndIt, EdgeRndOutIt >
```

The stochastic block model link predictor.

#### Template Parameters

|                   |                                                   |
|-------------------|---------------------------------------------------|
| <i>Network</i>    | The network type.                                 |
| <i>EdgeRndIt</i>  | A random iterator type used to iterate on edges.  |
| <i>ScoreRndIt</i> | A random iterator type used to iterate on scores. |

### 9.137.2 Constructor & Destructor Documentation

#### 9.137.2.1 USBMPredictor() [1/3]

```
template<typename Network = UNetwork<>, typename EdgeRndIt = typename std::vector<typename
Network::Edge>::const_iterator, typename ScoreRndIt = typename std::vector<double>::iterator,
typename EdgeRndOutIt = typename std::vector<typename Network::Edge>::iterator>
LinkPred::USBMPredictor< Network, EdgeRndIt, ScoreRndIt, EdgeRndOutIt >::USBMPredictor (
    std::shared_ptr< Network > const > net,
    long int seed ) [inline]
```

#### Parameters

|             |                                     |
|-------------|-------------------------------------|
| <i>net</i>  | The network.                        |
| <i>seed</i> | The random number generator's seed. |

#### 9.137.2.2 USBMPredictor() [2/3]

```
template<typename Network = UNetwork<>, typename EdgeRndIt = typename std::vector<typename
Network::Edge>::const_iterator, typename ScoreRndIt = typename std::vector<double>::iterator,
typename EdgeRndOutIt = typename std::vector<typename Network::Edge>::iterator>
LinkPred::USBMPredictor< Network, EdgeRndIt, ScoreRndIt, EdgeRndOutIt >::USBMPredictor (
    USBMPredictor< Network, EdgeRndIt, ScoreRndIt, EdgeRndOutIt > const & that )
[delete]
```

Copy constructor.

## Parameters

|             |                     |
|-------------|---------------------|
| <i>that</i> | The object to copy. |
|-------------|---------------------|

**9.137.2.3 USBMPredictor()** [3/3]

```
template<typename Network = UNetwork<>, typename EdgeRndIt = typename std::vector<typename
Network::Edge>::const_iterator, typename ScoreRndIt = typename std::vector<double>::iterator,
typename EdgeRndOutIt = typename std::vector<typename Network::Edge>::iterator>
LinkPred::USBMPredictor< Network, EdgeRndIt, ScoreRndIt, EdgeRndOutIt >::USBMPredictor (
    USBMPredictor< Network, EdgeRndIt, ScoreRndIt, EdgeRndOutIt > && that ) [delete]
```

Move constructor.

## Parameters

|             |                     |
|-------------|---------------------|
| <i>that</i> | The object to move. |
|-------------|---------------------|

**9.137.2.4 ~USBMPredictor()**

```
template<typename Network = UNetwork<>, typename EdgeRndIt = typename std::vector<typename
Network::Edge>::const_iterator, typename ScoreRndIt = typename std::vector<double>::iterator,
typename EdgeRndOutIt = typename std::vector<typename Network::Edge>::iterator>
virtual LinkPred::USBMPredictor< Network, EdgeRndIt, ScoreRndIt, EdgeRndOutIt >::~~USBMPredictor
( ) [virtual]
```

Destructor.

**9.137.3 Member Function Documentation****9.137.3.1 getMaxIter()**

```
template<typename Network = UNetwork<>, typename EdgeRndIt = typename std::vector<typename
Network::Edge>::const_iterator, typename ScoreRndIt = typename std::vector<double>::iterator,
typename EdgeRndOutIt = typename std::vector<typename Network::Edge>::iterator>
std::size_t LinkPred::USBMPredictor< Network, EdgeRndIt, ScoreRndIt, EdgeRndOutIt >::getMaxIter
( ) const [inline]
```

## Returns

The maximum number of iterations.

### 9.137.3.2 init()

```
template<typename Network = UNetwork<>, typename EdgeRndIt = typename std::vector<typename
Network::Edge>::const_iterator, typename ScoreRndIt = typename std::vector<double>::iterator,
typename EdgeRndOutIt = typename std::vector<typename Network::Edge>::iterator>
virtual void LinkPred::USBMPredictor< Network, EdgeRndIt, ScoreRndIt, EdgeRndOutIt >::init ( )
[virtual]
```

Initialize the solver.

Implements [LinkPred::ULPredictor< UNetwork<>, typename std::vector< typename UNetwork<> ::Edge >::const\\_iterator, typen](#)

### 9.137.3.3 learn()

```
template<typename Network = UNetwork<>, typename EdgeRndIt = typename std::vector<typename
Network::Edge>::const_iterator, typename ScoreRndIt = typename std::vector<double>::iterator,
typename EdgeRndOutIt = typename std::vector<typename Network::Edge>::iterator>
virtual void LinkPred::USBMPredictor< Network, EdgeRndIt, ScoreRndIt, EdgeRndOutIt >::learn (
) [virtual]
```

Learning.

Implements [LinkPred::ULPredictor< UNetwork<>, typename std::vector< typename UNetwork<> ::Edge >::const\\_iterator, typen](#)

### 9.137.3.4 operator=() [1/2]

```
template<typename Network = UNetwork<>, typename EdgeRndIt = typename std::vector<typename
Network::Edge>::const_iterator, typename ScoreRndIt = typename std::vector<double>::iterator,
typename EdgeRndOutIt = typename std::vector<typename Network::Edge>::iterator>
USBMPredictor& LinkPred::USBMPredictor< Network, EdgeRndIt, ScoreRndIt, EdgeRndOutIt >::operator=
(
    USBMPredictor< Network, EdgeRndIt, ScoreRndIt, EdgeRndOutIt > && that ) [delete]
```

Move assignment operator.

#### Parameters

|             |                     |
|-------------|---------------------|
| <i>that</i> | The object to move. |
|-------------|---------------------|

### 9.137.3.5 operator=() [2/2]

```
template<typename Network = UNetwork<>, typename EdgeRndIt = typename std::vector<typename
Network::Edge>::const_iterator, typename ScoreRndIt = typename std::vector<double>::iterator,
typename EdgeRndOutIt = typename std::vector<typename Network::Edge>::iterator>
```

```
USBMPredictor& LinkPred::USBMPredictor< Network, EdgeRndIt, ScoreRndIt, EdgeRndOutIt >::operator=
(
    USBMPredictor< Network, EdgeRndIt, ScoreRndIt, EdgeRndOutIt > const & that )
[delete]
```

Copy assignment operator.

#### Parameters

|             |                     |
|-------------|---------------------|
| <i>that</i> | The object to copy. |
|-------------|---------------------|

### 9.137.3.6 predict()

```
template<typename Network = UNetwork<>, typename EdgeRndIt = typename std::vector<typename
Network::Edge>::const_iterator, typename ScoreRndIt = typename std::vector<double>::iterator,
typename EdgeRndOutIt = typename std::vector<typename Network::Edge>::iterator>
virtual void LinkPred::USBMPredictor< Network, EdgeRndIt, ScoreRndIt, EdgeRndOutIt >::predict
(
    EdgeRndIt begin,
    EdgeRndIt end,
    ScoreRndIt scores ) [virtual]
```

Predict the links.

#### Parameters

|               |                                         |
|---------------|-----------------------------------------|
| <i>begin</i>  | Beginning of the links to be predicted. |
| <i>end</i>    | end of the links to be predicted.       |
| <i>scores</i> | Beginning of scores.                    |

Reimplemented from [LinkPred::ULPredictor< UNetwork<>, typename std::vector< typename UNetwork<> ::Edge >::const\\_iterator](#)

### 9.137.3.7 score()

```
template<typename Network = UNetwork<>, typename EdgeRndIt = typename std::vector<typename
Network::Edge>::const_iterator, typename ScoreRndIt = typename std::vector<double>::iterator,
typename EdgeRndOutIt = typename std::vector<typename Network::Edge>::iterator>
virtual double LinkPred::USBMPredictor< Network, EdgeRndIt, ScoreRndIt, EdgeRndOutIt >::score
(
    Edge const & e ) [inline], [virtual]
```

Compute the score of a single edge.

#### Parameters

|          |           |
|----------|-----------|
| <i>e</i> | The edge. |
|----------|-----------|



## Returns

The score of e.

## 9.137.3.8 setMaxIter()

```
template<typename Network = UNetwork<>, typename EdgeRndIt = typename std::vector<typename
Network::Edge>::const_iterator, typename ScoreRndIt = typename std::vector<double>::iterator,
typename EdgeRndOutIt = typename std::vector<typename Network::Edge>::iterator>
void LinkPred::USBMPredictor< Network, EdgeRndIt, ScoreRndIt, EdgeRndOutIt >::setMaxIter (
    std::size_t maxIter ) [inline]
```

Set the maximum number of iterations.

## Parameters

|                |                                       |
|----------------|---------------------------------------|
| <i>maxIter</i> | The new maximum number of iterations. |
|----------------|---------------------------------------|

The documentation for this class was generated from the following file:

- include/linkpred/predictors/undirected/usbmpredictor.hpp

## 9.138 LinkPred::USHPPredictor< Network, EdgeRndIt, ScoreRndIt, EdgeRndOutIt > Class Template Reference

A shortest path link predictor link predictor.

```
#include <ushppredictor.hpp>
```

Inheritance diagram for LinkPred::USHPPredictor< Network, EdgeRndIt, ScoreRndIt, EdgeRndOutIt >:

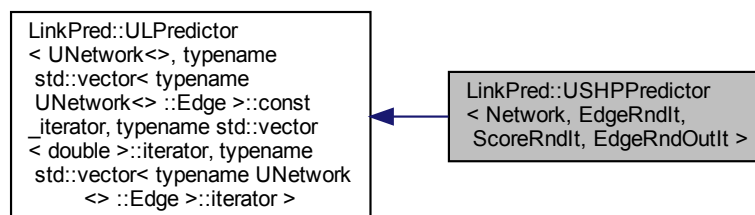

Collaboration diagram for LinkPred::USHPPredictor< Network, EdgeRndIt, ScoreRndIt, EdgeRndOutIt >:

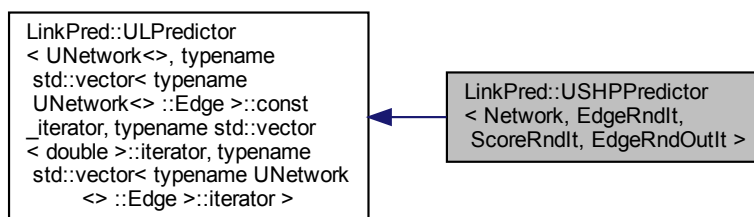

## Public Types

- enum [LandmarkStrategy](#) { [Random](#), [Hub](#), [IHub](#) }

*An enumeration of the different landmark positioning strategies.*

## Public Member Functions

- [USHPPredictor](#) (std::shared\_ptr< [Network](#) const > net, long int seed)
- [USHPPredictor](#) ([USHPPredictor](#) const &that)=default
- [USHPPredictor](#) & operator= ([USHPPredictor](#) const &that)=default
- [USHPPredictor](#) ([USHPPredictor](#) &&that)=default
- [USHPPredictor](#) & operator= ([USHPPredictor](#) &&that)=default
- virtual void [init](#) ()
- virtual void [learn](#) ()
- virtual void [predict](#) ([EdgeRndIt](#) begin, [EdgeRndIt](#) end, [ScoreRndIt](#) scores)
- virtual double [score](#) ([Edge](#) const &e)
- bool [getAsp](#) () const
- void [setAsp](#) (bool asp)
- double [getLandmarkRatio](#) () const
- void [setLandmarkRatio](#) (double landmarkRatio)
- [LandmarkStrategy](#) [getLandmarkStrategy](#) () const
- void [setLandmarkStrategy](#) ([LandmarkStrategy](#) landmarkStrategy)
- [CacheLevel](#) [getCacheLevel](#) () const
- void [setCacheLevel](#) ([CacheLevel](#) cacheLevel)
- virtual ~[USHPPredictor](#) ()=default

### 9.138.1 Detailed Description

```

template<typename Network = UNetwork<>, typename EdgeRndIt = typename std::vector<typename Network::Edge>::const_iterator,
        typename ScoreRndIt = typename std::vector<double>::iterator, typename EdgeRndOutIt = typename std::vector<typename Network::Edge>::iterator>
class LinkPred::USHPPredictor< Network, EdgeRndIt, ScoreRndIt, EdgeRndOutIt >
  
```

A shortest path link predictor link predictor.

## Template Parameters

|                         |                                                   |
|-------------------------|---------------------------------------------------|
| <i>Network</i>          | The network type.                                 |
| <i>Edge↔<br/>RndIt</i>  | A random iterator type used to iterate on edges.  |
| <i>Score↔<br/>RndIt</i> | A random iterator type used to iterate on scores. |

## 9.138.2 Member Enumeration Documentation

## 9.138.2.1 LandmarkStrategy

```
template<typename Network = UNetwork<>, typename EdgeRndIt = typename std::vector<typename
Network::Edge>::const_iterator, typename ScoreRndIt = typename std::vector<double>::iterator,
typename EdgeRndOutIt = typename std::vector<typename Network::Edge>::iterator>
enum LinkPred::USHPPredictor::LandmarkStrategy
```

An enumeration of the different landmark positioning strategies.

## Enumerator

|        |                                               |
|--------|-----------------------------------------------|
| Random | Landmarks are chosen randomly.                |
| Hub    | The nodes with the highest degree are chosen. |
| IHub   | The nodes with the lowest degree are chosen.  |

## 9.138.3 Constructor &amp; Destructor Documentation

## 9.138.3.1 USHPPredictor() [1/3]

```
template<typename Network = UNetwork<>, typename EdgeRndIt = typename std::vector<typename
Network::Edge>::const_iterator, typename ScoreRndIt = typename std::vector<double>::iterator,
typename EdgeRndOutIt = typename std::vector<typename Network::Edge>::iterator>
LinkPred::USHPPredictor< Network, EdgeRndIt, ScoreRndIt, EdgeRndOutIt >::USHPPredictor (
    std::shared_ptr< Network const > net,
    long int seed ) [inline]
```

## Parameters

|             |                                     |
|-------------|-------------------------------------|
| <i>net</i>  | The network.                        |
| <i>seed</i> | The random number generator's seed. |

**9.138.3.2 USHPPredictor()** [2/3]

```
template<typename Network = UNetwork<>, typename EdgeRndIt = typename std::vector<typename
Network::Edge>::const_iterator, typename ScoreRndIt = typename std::vector<double>::iterator,
typename EdgeRndOutIt = typename std::vector<typename Network::Edge>::iterator>
LinkPred::USHPPredictor< Network, EdgeRndIt, ScoreRndIt, EdgeRndOutIt >::USHPPredictor (
    USHPPredictor< Network, EdgeRndIt, ScoreRndIt, EdgeRndOutIt > const & that )
[default]
```

Copy constructor.

**Parameters**

|             |                     |
|-------------|---------------------|
| <i>that</i> | The object to copy. |
|-------------|---------------------|

**9.138.3.3 USHPPredictor()** [3/3]

```
template<typename Network = UNetwork<>, typename EdgeRndIt = typename std::vector<typename
Network::Edge>::const_iterator, typename ScoreRndIt = typename std::vector<double>::iterator,
typename EdgeRndOutIt = typename std::vector<typename Network::Edge>::iterator>
LinkPred::USHPPredictor< Network, EdgeRndIt, ScoreRndIt, EdgeRndOutIt >::USHPPredictor (
    USHPPredictor< Network, EdgeRndIt, ScoreRndIt, EdgeRndOutIt > && that ) [default]
```

Move constructor.

**Parameters**

|             |                     |
|-------------|---------------------|
| <i>that</i> | The object to move. |
|-------------|---------------------|

**9.138.3.4 ~USHPPredictor()**

```
template<typename Network = UNetwork<>, typename EdgeRndIt = typename std::vector<typename
Network::Edge>::const_iterator, typename ScoreRndIt = typename std::vector<double>::iterator,
typename EdgeRndOutIt = typename std::vector<typename Network::Edge>::iterator>
virtual LinkPred::USHPPredictor< Network, EdgeRndIt, ScoreRndIt, EdgeRndOutIt >::~USHPPredictor
( ) [virtual], [default]
```

Destructor.

**9.138.4 Member Function Documentation**

#### 9.138.4.1 getAsp()

```
template<typename Network = UNetwork<>, typename EdgeRndIt = typename std::vector<typename
Network::Edge>::const_iterator, typename ScoreRndIt = typename std::vector<double>::iterator,
typename EdgeRndOutIt = typename std::vector<typename Network::Edge>::iterator>
bool LinkPred::USHPPredictor< Network, EdgeRndIt, ScoreRndIt, EdgeRndOutIt >::getAsp ( ) const
[inline]
```

##### Returns

Whether approximate shortest path distances are used.

#### 9.138.4.2 getCacheLevel()

```
template<typename Network = UNetwork<>, typename EdgeRndIt = typename std::vector<typename
Network::Edge>::const_iterator, typename ScoreRndIt = typename std::vector<double>::iterator,
typename EdgeRndOutIt = typename std::vector<typename Network::Edge>::iterator>
CacheLevel LinkPred::USHPPredictor< Network, EdgeRndIt, ScoreRndIt, EdgeRndOutIt >::getCache↵
Level ( ) const [inline]
```

##### Returns

The distances cache level.

#### 9.138.4.3 getLandmarkRatio()

```
template<typename Network = UNetwork<>, typename EdgeRndIt = typename std::vector<typename
Network::Edge>::const_iterator, typename ScoreRndIt = typename std::vector<double>::iterator,
typename EdgeRndOutIt = typename std::vector<typename Network::Edge>::iterator>
double LinkPred::USHPPredictor< Network, EdgeRndIt, ScoreRndIt, EdgeRndOutIt >::getLandmark↵
Ratio ( ) const [inline]
```

##### Returns

The landmark ratio.

#### 9.138.4.4 getLandmarkStrategy()

```
template<typename Network = UNetwork<>, typename EdgeRndIt = typename std::vector<typename
Network::Edge>::const_iterator, typename ScoreRndIt = typename std::vector<double>::iterator,
typename EdgeRndOutIt = typename std::vector<typename Network::Edge>::iterator>
LandmarkStrategy LinkPred::USHPPredictor< Network, EdgeRndIt, ScoreRndIt, EdgeRndOutIt >↵
::getLandmarkStrategy ( ) const [inline]
```

##### Returns

The landmark strategy.

#### 9.138.4.5 init()

```
template<typename Network = UNetwork<>, typename EdgeRndIt = typename std::vector<typename
Network::Edge>::const_iterator, typename ScoreRndIt = typename std::vector<double>::iterator,
typename EdgeRndOutIt = typename std::vector<typename Network::Edge>::iterator>
virtual void LinkPred::USHPPredictor< Network, EdgeRndIt, ScoreRndIt, EdgeRndOutIt >::init ( )
[virtual]
```

Initialize the solver.

Implements [LinkPred::ULPredictor< UNetwork<>, typename std::vector< typename UNetwork<> ::Edge >::const\\_iterator, typen](#)

#### 9.138.4.6 learn()

```
template<typename Network = UNetwork<>, typename EdgeRndIt = typename std::vector<typename
Network::Edge>::const_iterator, typename ScoreRndIt = typename std::vector<double>::iterator,
typename EdgeRndOutIt = typename std::vector<typename Network::Edge>::iterator>
virtual void LinkPred::USHPPredictor< Network, EdgeRndIt, ScoreRndIt, EdgeRndOutIt >::learn (
) [virtual]
```

Learn.

Implements [LinkPred::ULPredictor< UNetwork<>, typename std::vector< typename UNetwork<> ::Edge >::const\\_iterator, typen](#)

#### 9.138.4.7 operator=() [1/2]

```
template<typename Network = UNetwork<>, typename EdgeRndIt = typename std::vector<typename
Network::Edge>::const_iterator, typename ScoreRndIt = typename std::vector<double>::iterator,
typename EdgeRndOutIt = typename std::vector<typename Network::Edge>::iterator>
USHPPredictor& LinkPred::USHPPredictor< Network, EdgeRndIt, ScoreRndIt, EdgeRndOutIt >::operator=
(
    USHPPredictor< Network, EdgeRndIt, ScoreRndIt, EdgeRndOutIt > && that ) [default]
```

Move assignment operator.

Parameters

|             |                     |
|-------------|---------------------|
| <i>that</i> | The object to move. |
|-------------|---------------------|

#### 9.138.4.8 operator=() [2/2]

```
template<typename Network = UNetwork<>, typename EdgeRndIt = typename std::vector<typename
Network::Edge>::const_iterator, typename ScoreRndIt = typename std::vector<double>::iterator,
typename EdgeRndOutIt = typename std::vector<typename Network::Edge>::iterator>
```

```
USHPPredictor& LinkPred::USHPPredictor< Network, EdgeRndIt, ScoreRndIt, EdgeRndOutIt >::operator=
(
    USHPPredictor< Network, EdgeRndIt, ScoreRndIt, EdgeRndOutIt > const & that )
[default]
```

Copy assignment operator.

#### Parameters

|             |                     |
|-------------|---------------------|
| <i>that</i> | The object to copy. |
|-------------|---------------------|

#### 9.138.4.9 predict()

```
template<typename Network = UNetwork<>, typename EdgeRndIt = typename std::vector<typename
Network::Edge>::const_iterator, typename ScoreRndIt = typename std::vector<double>::iterator,
typename EdgeRndOutIt = typename std::vector<typename Network::Edge>::iterator>
virtual void LinkPred::USHPPredictor< Network, EdgeRndIt, ScoreRndIt, EdgeRndOutIt >::predict
(
    EdgeRndIt begin,
    EdgeRndIt end,
    ScoreRndIt scores ) [virtual]
```

Predict the links.

#### Parameters

|               |                                         |
|---------------|-----------------------------------------|
| <i>begin</i>  | Beginning of the links to be predicted. |
| <i>end</i>    | end of the links to be predicted.       |
| <i>scores</i> | Beginning of scores.                    |

Reimplemented from [LinkPred::ULPredictor< UNetwork<>, typename std::vector< typename UNetwork<> ::Edge >::const\\_iterator](#)

#### 9.138.4.10 score()

```
template<typename Network = UNetwork<>, typename EdgeRndIt = typename std::vector<typename
Network::Edge>::const_iterator, typename ScoreRndIt = typename std::vector<double>::iterator,
typename EdgeRndOutIt = typename std::vector<typename Network::Edge>::iterator>
virtual double LinkPred::USHPPredictor< Network, EdgeRndIt, ScoreRndIt, EdgeRndOutIt >::score
(
    Edge const & e ) [virtual]
```

Compute the score of a single edge.

#### Parameters

|          |           |
|----------|-----------|
| <i>e</i> | The edge. |
|----------|-----------|

**Returns**

The score of e.

**9.138.4.11 setAsp()**

```
template<typename Network = UNetwork<>, typename EdgeRndIt = typename std::vector<typename
Network::Edge>::const_iterator, typename ScoreRndIt = typename std::vector<double>::iterator,
typename EdgeRndOutIt = typename std::vector<typename Network::Edge>::iterator>
void LinkPred::USHPPredictor< Network, EdgeRndIt, ScoreRndIt, EdgeRndOutIt >::setAsp (
    bool asp ) [inline]
```

Set Whether approximate shortest path distances are used.

**Parameters**

|            |                                                             |
|------------|-------------------------------------------------------------|
| <i>asp</i> | Whether approximate shortest path distances should be used. |
|------------|-------------------------------------------------------------|

**9.138.4.12 setCacheLevel()**

```
template<typename Network = UNetwork<>, typename EdgeRndIt = typename std::vector<typename
Network::Edge>::const_iterator, typename ScoreRndIt = typename std::vector<double>::iterator,
typename EdgeRndOutIt = typename std::vector<typename Network::Edge>::iterator>
void LinkPred::USHPPredictor< Network, EdgeRndIt, ScoreRndIt, EdgeRndOutIt >::setCacheLevel (
    CacheLevel cacheLevel ) [inline]
```

Set the distances cache level.

**Parameters**

|                   |                                |
|-------------------|--------------------------------|
| <i>cacheLevel</i> | The new distances cache level. |
|-------------------|--------------------------------|

**9.138.4.13 setLandmarkRatio()**

```
template<typename Network = UNetwork<>, typename EdgeRndIt = typename std::vector<typename
Network::Edge>::const_iterator, typename ScoreRndIt = typename std::vector<double>::iterator,
typename EdgeRndOutIt = typename std::vector<typename Network::Edge>::iterator>
void LinkPred::USHPPredictor< Network, EdgeRndIt, ScoreRndIt, EdgeRndOutIt >::setLandmarkRatio
(
    double landmarkRatio ) [inline]
```

Set the landmark ratio.



## Parameters

|                      |                         |
|----------------------|-------------------------|
| <i>landmarkRatio</i> | The new landmark ratio. |
|----------------------|-------------------------|

## 9.138.4.14 setLandmarkStrategy()

```
template<typename Network = UNetwork<>, typename EdgeRndIt = typename std::vector<typename
Network::Edge>::const_iterator, typename ScoreRndIt = typename std::vector<double>::iterator,
typename EdgeRndOutIt = typename std::vector<typename Network::Edge>::iterator>
void LinkPred::USHPPredictor< Network, EdgeRndIt, ScoreRndIt, EdgeRndOutIt >::setLandmark↵
Strategy (
    LandmarkStrategy landmarkStrategy ) [inline]
```

Set the landmark strategy.

## Parameters

|                         |                            |
|-------------------------|----------------------------|
| <i>landmarkStrategy</i> | The new landmark strategy. |
|-------------------------|----------------------------|

The documentation for this class was generated from the following file:

- [include/linkpred/predictors/undirected/ushppredictor.hpp](#)

## 9.139 LinkPred::USOIPredictor< Network, EdgeRndIt, ScoreRndIt, EdgeRndOutIt > Class Template Reference

A Sorensen index link predictor.

```
#include <usoipredictor.hpp>
```

Inheritance diagram for LinkPred::USOIPredictor< Network, EdgeRndIt, ScoreRndIt, EdgeRndOutIt >:

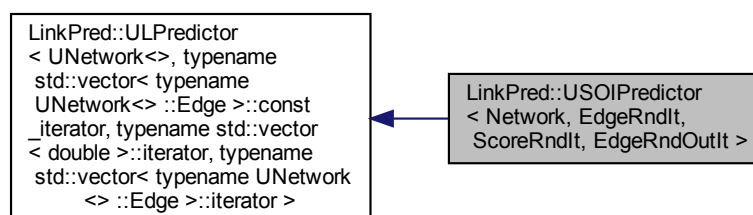

Collaboration diagram for LinkPred::USOIPredictor< Network, EdgeRndIt, ScoreRndIt, EdgeRndOutIt >:

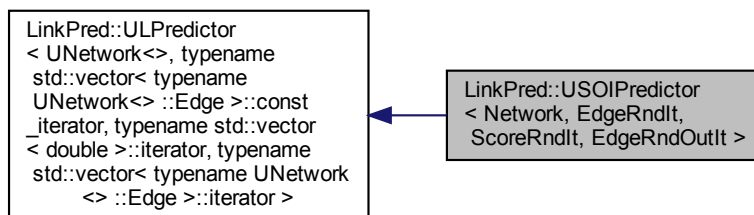

## Public Member Functions

- [USOIPredictor](#) (std::shared\_ptr< [Network](#) const > net)
- [USOIPredictor](#) ([USOIPredictor](#) const &that)=default
- [USOIPredictor](#) & [operator=](#) ([USOIPredictor](#) const &that)=default
- [USOIPredictor](#) ([USOIPredictor](#) &&that)=default
- [USOIPredictor](#) & [operator=](#) ([USOIPredictor](#) &&that)=default
- virtual void [init](#) ()
- virtual void [learn](#) ()
- virtual double [score](#) (Edge const &e)
- virtual void [predict](#) ([EdgeRndIt](#) begin, [EdgeRndIt](#) end, [ScoreRndIt](#) scores)
- virtual std::size\_t [top](#) (std::size\_t k, [EdgeRndOutIt](#) eit, [ScoreRndIt](#) sit)
- virtual [~USOIPredictor](#) ()=default

## Additional Inherited Members

### 9.139.1 Detailed Description

```

template<typename Network = UNetwork<>, typename EdgeRndIt = typename std::vector<typename Network::Edge>::const_iterator,
typename ScoreRndIt = typename std::vector<double>::iterator, typename EdgeRndOutIt = typename std::vector<typename Network::Edge>::iterator>
class LinkPred::USOIPredictor< Network, EdgeRndIt, ScoreRndIt, EdgeRndOutIt >

```

A Sorensen index link predictor.

#### Template Parameters

|                   |                                                   |
|-------------------|---------------------------------------------------|
| <i>Network</i>    | The network type.                                 |
| <i>EdgeRndIt</i>  | A random iterator type used to iterate on edges.  |
| <i>ScoreRndIt</i> | A random iterator type used to iterate on scores. |

## 9.139.2 Constructor & Destructor Documentation

### 9.139.2.1 USOIPredictor() [1/3]

```
template<typename Network = UNetwork<>, typename EdgeRndIt = typename std::vector<typename
Network::Edge>::const_iterator, typename ScoreRndIt = typename std::vector<double>::iterator,
typename EdgeRndOutIt = typename std::vector<typename Network::Edge>::iterator>
LinkPred::USOIPredictor< Network, EdgeRndIt, ScoreRndIt, EdgeRndOutIt >::USOIPredictor (
    std::shared_ptr< Network const > net ) [inline]
```

#### Parameters

|            |              |
|------------|--------------|
| <i>net</i> | The network. |
|------------|--------------|

### 9.139.2.2 USOIPredictor() [2/3]

```
template<typename Network = UNetwork<>, typename EdgeRndIt = typename std::vector<typename
Network::Edge>::const_iterator, typename ScoreRndIt = typename std::vector<double>::iterator,
typename EdgeRndOutIt = typename std::vector<typename Network::Edge>::iterator>
LinkPred::USOIPredictor< Network, EdgeRndIt, ScoreRndIt, EdgeRndOutIt >::USOIPredictor (
    USOIPredictor< Network, EdgeRndIt, ScoreRndIt, EdgeRndOutIt > const & that )
[default]
```

Copy constructor.

#### Parameters

|             |                     |
|-------------|---------------------|
| <i>that</i> | The object to copy. |
|-------------|---------------------|

### 9.139.2.3 USOIPredictor() [3/3]

```
template<typename Network = UNetwork<>, typename EdgeRndIt = typename std::vector<typename
Network::Edge>::const_iterator, typename ScoreRndIt = typename std::vector<double>::iterator,
typename EdgeRndOutIt = typename std::vector<typename Network::Edge>::iterator>
LinkPred::USOIPredictor< Network, EdgeRndIt, ScoreRndIt, EdgeRndOutIt >::USOIPredictor (
    USOIPredictor< Network, EdgeRndIt, ScoreRndIt, EdgeRndOutIt > && that ) [default]
```

Move constructor.

#### Parameters

|             |                     |
|-------------|---------------------|
| <i>that</i> | The object to move. |
|-------------|---------------------|

### 9.139.2.4 ~USOIPredictor()

```
template<typename Network = UNetwork<>, typename EdgeRndIt = typename std::vector<typename
Network::Edge>::const_iterator, typename ScoreRndIt = typename std::vector<double>::iterator,
typename EdgeRndOutIt = typename std::vector<typename Network::Edge>::iterator>
virtual LinkPred::USOIPredictor< Network, EdgeRndIt, ScoreRndIt, EdgeRndOutIt >::~~USOIPredictor
( ) [virtual], [default]
```

Destructor.

## 9.139.3 Member Function Documentation

### 9.139.3.1 init()

```
template<typename Network = UNetwork<>, typename EdgeRndIt = typename std::vector<typename
Network::Edge>::const_iterator, typename ScoreRndIt = typename std::vector<double>::iterator,
typename EdgeRndOutIt = typename std::vector<typename Network::Edge>::iterator>
virtual void LinkPred::USOIPredictor< Network, EdgeRndIt, ScoreRndIt, EdgeRndOutIt >::init ( )
[inline], [virtual]
```

Initialize the solver.

Implements [LinkPred::ULPredictor< UNetwork<>, typename std::vector< typename UNetwork<> ::Edge >::const\\_iterator, typena](#)

### 9.139.3.2 learn()

```
template<typename Network = UNetwork<>, typename EdgeRndIt = typename std::vector<typename
Network::Edge>::const_iterator, typename ScoreRndIt = typename std::vector<double>::iterator,
typename EdgeRndOutIt = typename std::vector<typename Network::Edge>::iterator>
virtual void LinkPred::USOIPredictor< Network, EdgeRndIt, ScoreRndIt, EdgeRndOutIt >::learn (
) [inline], [virtual]
```

Solve the link prediction problem.

Implements [LinkPred::ULPredictor< UNetwork<>, typename std::vector< typename UNetwork<> ::Edge >::const\\_iterator, typena](#)

### 9.139.3.3 operator=() [1/2]

```
template<typename Network = UNetwork<>, typename EdgeRndIt = typename std::vector<typename
Network::Edge>::const_iterator, typename ScoreRndIt = typename std::vector<double>::iterator,
typename EdgeRndOutIt = typename std::vector<typename Network::Edge>::iterator>
USOIPredictor& LinkPred::USOIPredictor< Network, EdgeRndIt, ScoreRndIt, EdgeRndOutIt >::operator=
(
    USOIPredictor< Network, EdgeRndIt, ScoreRndIt, EdgeRndOutIt > && that ) [default]
```

Move assignment operator.

## Parameters

|             |                     |
|-------------|---------------------|
| <i>that</i> | The object to move. |
|-------------|---------------------|

## 9.139.3.4 operator=() [2/2]

```
template<typename Network = UNetwork<>, typename EdgeRndIt = typename std::vector<typename
Network::Edge>::const_iterator, typename ScoreRndIt = typename std::vector<double>::iterator,
typename EdgeRndOutIt = typename std::vector<typename Network::Edge>::iterator>
USOIPredictor& LinkPred::USOIPredictor< Network, EdgeRndIt, ScoreRndIt, EdgeRndOutIt >::operator=
(
    USOIPredictor< Network, EdgeRndIt, ScoreRndIt, EdgeRndOutIt > const & that )
[default]
```

Copy assignment operator.

## Parameters

|             |                     |
|-------------|---------------------|
| <i>that</i> | The object to copy. |
|-------------|---------------------|

## 9.139.3.5 predict()

```
template<typename Network = UNetwork<>, typename EdgeRndIt = typename std::vector<typename
Network::Edge>::const_iterator, typename ScoreRndIt = typename std::vector<double>::iterator,
typename EdgeRndOutIt = typename std::vector<typename Network::Edge>::iterator>
virtual void LinkPred::USOIPredictor< Network, EdgeRndIt, ScoreRndIt, EdgeRndOutIt >::predict
(
    EdgeRndIt begin,
    EdgeRndIt end,
    ScoreRndIt scores ) [virtual]
```

Predict the links.

## Parameters

|               |                                         |
|---------------|-----------------------------------------|
| <i>begin</i>  | Beginning of the links to be predicted. |
| <i>end</i>    | end of the links to be predicted.       |
| <i>scores</i> | Beginning of scores.                    |

Reimplemented from [LinkPred::ULPredictor< UNetwork<>, typename std::vector< typename UNetwork<> ::Edge >::const\\_iterator](#)

## 9.139.3.6 score()

```
template<typename Network = UNetwork<>, typename EdgeRndIt = typename std::vector<typename
Network::Edge>::const_iterator, typename ScoreRndIt = typename std::vector<double>::iterator,
```

```

typename EdgeRndOutIt = typename std::vector<typename Network::Edge>::iterator>
virtual double LinkPred::USOIPredictor< Network, EdgeRndIt, ScoreRndIt, EdgeRndOutIt >::score
(
    Edge const & e ) [inline], [virtual]

```

Compute the score of a single edge.

#### Parameters

|          |           |
|----------|-----------|
| <i>e</i> | The edge. |
|----------|-----------|

#### Returns

The score of *e*.

### 9.139.3.7 top()

```

template<typename Network = UNetwork<>, typename EdgeRndIt = typename std::vector<typename
Network::Edge>::const_iterator, typename ScoreRndIt = typename std::vector<double>::iterator,
typename EdgeRndOutIt = typename std::vector<typename Network::Edge>::iterator>
virtual std::size_t LinkPred::USOIPredictor< Network, EdgeRndIt, ScoreRndIt, EdgeRndOutIt >↔
::top (
    std::size_t k,
    EdgeRndOutIt eit,
    ScoreRndIt sit ) [virtual]

```

Finds the *k* negative edges with the top score. Ties are broken randomly.

#### Parameters

|            |                                                                                                         |
|------------|---------------------------------------------------------------------------------------------------------|
| <i>k</i>   | The number of edges to find.                                                                            |
| <i>eit</i> | An output iterator where the edges are written.                                                         |
| <i>sit</i> | An output iterator where the scores are written. The scores are written in the same order as the edges. |

#### Returns

The number of negative edges inserted. It is the minimum between *k* and the number of negative edges in the network.

Reimplemented from [LinkPred::ULPredictor< UNetwork<>, typename std::vector< typename UNetwork<> ::Edge >::const\\_iterator](#)

The documentation for this class was generated from the following file:

- [include/linkpred/predictors/undirected/usoipredictor.hpp](#)

## 9.140 LinkPred::USUMPredictor< Network, EdgeRndIt, ScoreRndIt, EdgeRndOutIt > Class Template Reference

A sum-of-degrees link predictor.

```
#include <usumpredictor.hpp>
```

Inheritance diagram for LinkPred::USUMPredictor< Network, EdgeRndIt, ScoreRndIt, EdgeRndOutIt >:

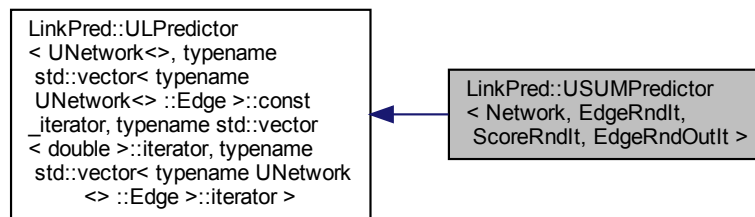

Collaboration diagram for LinkPred::USUMPredictor< Network, EdgeRndIt, ScoreRndIt, EdgeRndOutIt >:

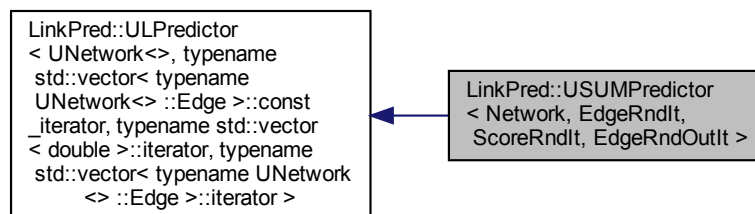

### Public Member Functions

- [USUMPredictor](#) (std::shared\_ptr< [Network](#) const > net)
- [USUMPredictor](#) ([USUMPredictor](#) const &that)=default
- [USUMPredictor](#) & operator= ([USUMPredictor](#) const &that)=default
- [USUMPredictor](#) ([USUMPredictor](#) &&that)=default
- [USUMPredictor](#) & operator= ([USUMPredictor](#) &&that)=default
- virtual void [init](#) ()
- virtual void [learn](#) ()
- virtual void [predict](#) ([EdgeRndIt](#) begin, [EdgeRndIt](#) end, [ScoreRndIt](#) scores)
- virtual double [score](#) ([Edge](#) const &e)
- virtual std::size\_t [top](#) (std::size\_t k, [EdgeRndOutIt](#) eit, [ScoreRndIt](#) sit)
- virtual [~USUMPredictor](#) ()=default

## Additional Inherited Members

### 9.140.1 Detailed Description

```
template<typename Network = UNetwork<>, typename EdgeRndIt = typename std::vector<typename Network::Edge>::const_iterator,
        typename ScoreRndIt = typename std::vector<double>::iterator, typename EdgeRndOutIt = typename std::vector<typename Network::Edge>::iterator>
class LinkPred::USUMPredictor< Network, EdgeRndIt, ScoreRndIt, EdgeRndOutIt >
```

A sum-of-degrees link predictor.

#### Template Parameters

|                   |                                                   |
|-------------------|---------------------------------------------------|
| <i>Network</i>    | The network type.                                 |
| <i>EdgeRndIt</i>  | A random iterator type used to iterate on edges.  |
| <i>ScoreRndIt</i> | A random iterator type used to iterate on scores. |

### 9.140.2 Constructor & Destructor Documentation

#### 9.140.2.1 USUMPredictor() [1/3]

```
template<typename Network = UNetwork<>, typename EdgeRndIt = typename std::vector<typename
Network::Edge>::const_iterator, typename ScoreRndIt = typename std::vector<double>::iterator,
typename EdgeRndOutIt = typename std::vector<typename Network::Edge>::iterator>
LinkPred::USUMPredictor< Network, EdgeRndIt, ScoreRndIt, EdgeRndOutIt >::USUMPredictor (
    std::shared_ptr< Network const > net ) [inline]
```

#### Parameters

|            |              |
|------------|--------------|
| <i>net</i> | The network. |
|------------|--------------|

#### 9.140.2.2 USUMPredictor() [2/3]

```
template<typename Network = UNetwork<>, typename EdgeRndIt = typename std::vector<typename
Network::Edge>::const_iterator, typename ScoreRndIt = typename std::vector<double>::iterator,
typename EdgeRndOutIt = typename std::vector<typename Network::Edge>::iterator>
LinkPred::USUMPredictor< Network, EdgeRndIt, ScoreRndIt, EdgeRndOutIt >::USUMPredictor (
    USUMPredictor< Network, EdgeRndIt, ScoreRndIt, EdgeRndOutIt > const & that )
[default]
```

Copy constructor.



## Parameters

|             |                     |
|-------------|---------------------|
| <i>that</i> | The object to copy. |
|-------------|---------------------|

## 9.140.2.3 USUMPredictor() [3/3]

```
template<typename Network = UNetwork<>, typename EdgeRndIt = typename std::vector<typename
Network::Edge>::const_iterator, typename ScoreRndIt = typename std::vector<double>::iterator,
typename EdgeRndOutIt = typename std::vector<typename Network::Edge>::iterator>
LinkPred::USUMPredictor< Network, EdgeRndIt, ScoreRndIt, EdgeRndOutIt >::USUMPredictor (
    USUMPredictor< Network, EdgeRndIt, ScoreRndIt, EdgeRndOutIt > && that ) [default]
```

Move constructor.

## Parameters

|             |                     |
|-------------|---------------------|
| <i>that</i> | The object to move. |
|-------------|---------------------|

## 9.140.2.4 ~USUMPredictor()

```
template<typename Network = UNetwork<>, typename EdgeRndIt = typename std::vector<typename
Network::Edge>::const_iterator, typename ScoreRndIt = typename std::vector<double>::iterator,
typename EdgeRndOutIt = typename std::vector<typename Network::Edge>::iterator>
virtual LinkPred::USUMPredictor< Network, EdgeRndIt, ScoreRndIt, EdgeRndOutIt >::~~USUMPredictor
( ) [virtual], [default]
```

Destructor.

## 9.140.3 Member Function Documentation

## 9.140.3.1 init()

```
template<typename Network = UNetwork<>, typename EdgeRndIt = typename std::vector<typename
Network::Edge>::const_iterator, typename ScoreRndIt = typename std::vector<double>::iterator,
typename EdgeRndOutIt = typename std::vector<typename Network::Edge>::iterator>
virtual void LinkPred::USUMPredictor< Network, EdgeRndIt, ScoreRndIt, EdgeRndOutIt >::init ( )
[inline], [virtual]
```

Initialize the predictor.

Implements [LinkPred::ULPredictor< UNetwork<>, typename std::vector< typename UNetwork<> ::Edge >::const\\_iterator, typena](#)

### 9.140.3.2 learn()

```
template<typename Network = UNetwork<>, typename EdgeRndIt = typename std::vector<typename
Network::Edge>::const_iterator, typename ScoreRndIt = typename std::vector<double>::iterator,
typename EdgeRndOutIt = typename std::vector<typename Network::Edge>::iterator>
virtual void LinkPred::USUMPredictor< Network, EdgeRndIt, ScoreRndIt, EdgeRndOutIt >::learn (
) [inline], [virtual]
```

Learning.

Implements [LinkPred::ULPredictor< UNetwork<>, typename std::vector< typename UNetwork<> ::Edge >::const\\_iterator, typen](#)

### 9.140.3.3 operator=() [1/2]

```
template<typename Network = UNetwork<>, typename EdgeRndIt = typename std::vector<typename
Network::Edge>::const_iterator, typename ScoreRndIt = typename std::vector<double>::iterator,
typename EdgeRndOutIt = typename std::vector<typename Network::Edge>::iterator>
USUMPredictor& LinkPred::USUMPredictor< Network, EdgeRndIt, ScoreRndIt, EdgeRndOutIt >::operator=
(
    USUMPredictor< Network, EdgeRndIt, ScoreRndIt, EdgeRndOutIt > && that ) [default]
```

Move assignment operator.

#### Parameters

|             |                     |
|-------------|---------------------|
| <i>that</i> | The object to move. |
|-------------|---------------------|

### 9.140.3.4 operator=() [2/2]

```
template<typename Network = UNetwork<>, typename EdgeRndIt = typename std::vector<typename
Network::Edge>::const_iterator, typename ScoreRndIt = typename std::vector<double>::iterator,
typename EdgeRndOutIt = typename std::vector<typename Network::Edge>::iterator>
USUMPredictor& LinkPred::USUMPredictor< Network, EdgeRndIt, ScoreRndIt, EdgeRndOutIt >::operator=
(
    USUMPredictor< Network, EdgeRndIt, ScoreRndIt, EdgeRndOutIt > const & that )
[default]
```

Copy assignment operator.

#### Parameters

|             |                     |
|-------------|---------------------|
| <i>that</i> | The object to copy. |
|-------------|---------------------|

### 9.140.3.5 predict()

```
template<typename Network = UNetwork<>, typename EdgeRndIt = typename std::vector<typename
Network::Edge>::const_iterator, typename ScoreRndIt = typename std::vector<double>::iterator,
typename EdgeRndOutIt = typename std::vector<typename Network::Edge>::iterator>
virtual void LinkPred::USUMPredictor< Network, EdgeRndIt, ScoreRndIt, EdgeRndOutIt >::predict
(
    EdgeRndIt begin,
    EdgeRndIt end,
    ScoreRndIt scores ) [virtual]
```

Predict the links.

#### Parameters

|               |                                         |
|---------------|-----------------------------------------|
| <i>begin</i>  | Beginning of the links to be predicted. |
| <i>end</i>    | end of the links to be predicted.       |
| <i>scores</i> | Beginning of scores.                    |

Reimplemented from [LinkPred::ULPredictor< UNetwork<>, typename std::vector< typename UNetwork<> ::Edge >::const\\_iterator](#)

### 9.140.3.6 score()

```
template<typename Network = UNetwork<>, typename EdgeRndIt = typename std::vector<typename
Network::Edge>::const_iterator, typename ScoreRndIt = typename std::vector<double>::iterator,
typename EdgeRndOutIt = typename std::vector<typename Network::Edge>::iterator>
virtual double LinkPred::USUMPredictor< Network, EdgeRndIt, ScoreRndIt, EdgeRndOutIt >::score
(
    Edge const & e ) [virtual]
```

Compute the score of a single edge.

#### Parameters

|          |           |
|----------|-----------|
| <i>e</i> | The edge. |
|----------|-----------|

#### Returns

The score of e.

### 9.140.3.7 top()

```
template<typename Network = UNetwork<>, typename EdgeRndIt = typename std::vector<typename
Network::Edge>::const_iterator, typename ScoreRndIt = typename std::vector<double>::iterator,
typename EdgeRndOutIt = typename std::vector<typename Network::Edge>::iterator>
```

```
virtual std::size_t LinkPred::USUMPredictor< Network, EdgeRndIt, ScoreRndIt, EdgeRndOutIt >↵
::top (
    std::size_t k,
    EdgeRndOutIt eit,
    ScoreRndIt sit ) [inline], [virtual]
```

Finds the k negative edges with the top score. Ties are broken randomly.

#### Parameters

|            |                                                                                                         |
|------------|---------------------------------------------------------------------------------------------------------|
| <i>k</i>   | The number of edges to find.                                                                            |
| <i>eit</i> | An output iterator where the edges are written.                                                         |
| <i>sit</i> | An output iterator where the scores are written. The scores are written in the same order as the edges. |

#### Returns

The number of negative edges inserted. It is the minimum between k and the number of negative edges in the network.

Reimplemented from [LinkPred::ULPredictor< UNetwork<>, typename std::vector< typename UNetwork<> ::Edge >::const\\_iterator](#)

The documentation for this class was generated from the following file:

- [include/linkpred/predictors/undirected/usumpredictor.hpp](#)

## 9.141 LinkPred::Vec Class Reference

This class represent a vector (in the sense of linear algebra).

```
#include <vec.hpp>
```

### Public Member Functions

- [Vec](#) ()
- [Vec](#) (int n)
- [Vec](#) (std::initializer\_list< double > l)
- [Vec](#) (int n, double \*vals)
- [Vec](#) ([Vec](#) const &v, std::shared\_ptr< std::vector< int >> ind)
- [Vec](#) ([Vec](#) const &v1, [Vec](#) const &v2)
- [Vec](#) ([Vec](#) const &that)
- [Vec](#) & [operator=](#) ([Vec](#) const &that)
- [Vec](#) ([Vec](#) &&that)
- [Vec](#) & [operator=](#) ([Vec](#) &&that)
- int [size](#) () const
- double \* [getValues](#) () const
- bool [isConstant](#) () const
- void [setConstant](#) (bool constant)
- bool [makeConstant](#) (double tol)
- void [resize](#) (int newSize)
- void [resize](#) (int newSize, double val)

- bool `operator==` (const `Vec` &other) const
- bool `operator!=` (const `Vec` &other) const
- double & `operator[]` (const int k)
- double `operator[]` (const int k) const
- std::vector< int > `findNz` () const
- std::vector< int > `find` (double val) const
- void `reset` ()
- void `reset` (double val)
- void `read` (std::ifstream \*in)
- void `write` (std::ofstream \*out) const
- void `read` (std::string fileName)
- void `write` (std::string fileName) const
- double `norm` () const
- double `mean` () const
- double `amin` () const
- double `amax` () const
- double `min` () const
- double `max` () const
- int `imin` () const
- int `imax` () const
- int `ifmin` () const
- int `ifmax` () const
- int `ilmin` () const
- int `ilmax` () const
- void `center` ()
- double `norm` (int lim) const
- double `mean` (int lim) const
- double `amin` (int lim) const
- double `amax` (int lim) const
- double `min` (int lim) const
- double `max` (int lim) const
- void `center` (int lim)
- void `axpy` (double a, `Vec` const &x)
- void `scale` (double a)
- void `partScale` (int start, int nb, double a)
- void `scatter` (int start, `Vec` const &v, int const \*ind)
- double `sum` () const
- void `print` () const
- void `print` (std::string header) const
- void `print` (std::ostream &out) const
- void `print` (std::ostream &out, std::string header) const
- virtual `~Vec` ()

## Friends

- class **GFMMatrix**
- `Vec operator+` (`Vec` const &v1, `Vec` const &v2)
- `Vec operator-` (`Vec` const &v1, `Vec` const &v2)
- `Vec operator*` (double a, `Vec` const &v)
- `Vec operator*` (`Vec` const &v1, `Vec` const &v2)
- `Vec operator/` (`Vec` const &v1, `Vec` const &v2)
- `Vec operator+` (double a, `Vec` const &v)
- `Vec operator-` (double a, `Vec` const &v)
- `Vec operator*` (double a, `Vec` const &v)

- [Vec operator/](#) (double a, [Vec](#) const &v)
- [Vec operator+](#) ([Vec](#) const &v, double a)
- [Vec operator-](#) ([Vec](#) const &v, double a)
- [Vec operator\\*](#) ([Vec](#) const &v, double a)
- [Vec operator/](#) ([Vec](#) const &v, double a)
- double [operator^](#) ([Vec](#) const &v1, [Vec](#) const &v2)
- [GFMatrix operator+](#) (const [GFMatrix](#) &mat1, const [Vec](#) &mat2)
- [GFMatrix operator+](#) (const [Vec](#) &mat1, const [GFMatrix](#) &mat2)
- [GFMatrix operator-](#) (const [GFMatrix](#) &mat1, const [Vec](#) &mat2)
- [GFMatrix operator-](#) (const [Vec](#) &mat1, const [GFMatrix](#) &mat2)
- [Vec operator\\*](#) (const [GFMatrix](#) &mat, const [Vec](#) &vec)

### 9.141.1 Detailed Description

This class represent a vector (in the sense of linear algebra).

### 9.141.2 Constructor & Destructor Documentation

#### 9.141.2.1 [Vec\(\)](#) [1/8]

```
LinkPred::Vec::Vec ( )
```

Default constructor.

#### 9.141.2.2 [Vec\(\)](#) [2/8]

```
LinkPred::Vec::Vec (
    int n )
```

Constructor.

Parameters

|          |                |
|----------|----------------|
| <i>n</i> | The dimension. |
|----------|----------------|

#### 9.141.2.3 [Vec\(\)](#) [3/8]

```
LinkPred::Vec::Vec (
    std::initializer_list< double > l )
```

Constructor.

## Parameters

|          |                   |
|----------|-------------------|
| <i>/</i> | Initializer list. |
|----------|-------------------|

**9.141.2.4 Vec()** [4/8]

```
LinkPred::Vec::Vec (
    int n,
    double * vals )
```

Constructor.

## Parameters

|             |                |
|-------------|----------------|
| <i>n</i>    | The dimension. |
| <i>vals</i> | The values.    |

**9.141.2.5 Vec()** [5/8]

```
LinkPred::Vec::Vec (
    Vec const & v,
    std::shared_ptr< std::vector< int >> ind )
```

Create a new vector from an existing one by copying specified elements.

## Parameters

|            |                                          |
|------------|------------------------------------------|
| <i>v</i>   | The vector from which the data is taken. |
| <i>ind</i> | Index of the elements to be copied.      |

**9.141.2.6 Vec()** [6/8]

```
LinkPred::Vec::Vec (
    Vec const & v1,
    Vec const & v2 )
```

Create a new vector from two existing ones by concatenation.

## Parameters

|           |                    |
|-----------|--------------------|
| <i>v1</i> | The first vector.  |
| <i>v2</i> | The second vector. |

#### 9.141.2.7 Vec() [7/8]

```
LinkPred::Vec::Vec (
    Vec const & that )
```

Copy constructor.

##### Parameters

|             |                     |
|-------------|---------------------|
| <i>that</i> | The object to copy. |
|-------------|---------------------|

#### 9.141.2.8 Vec() [8/8]

```
LinkPred::Vec::Vec (
    Vec && that )
```

Move constructor.

##### Parameters

|             |                     |
|-------------|---------------------|
| <i>that</i> | The object to move. |
|-------------|---------------------|

#### 9.141.2.9 ~Vec()

```
virtual LinkPred::Vec::~Vec ( ) [virtual]
```

Destructor.

### 9.141.3 Member Function Documentation

#### 9.141.3.1 amax() [1/2]

```
double LinkPred::Vec::amax ( ) const
```

##### Returns

The maximum absolute value in the vector.



### 9.141.3.2 `amax()` [2/2]

```
double LinkPred::Vec::amax (
    int lim ) const
```

#### Returns

The maximum absolute value in the vector up to `lim` number of elements.

#### Parameters

|            |            |
|------------|------------|
| <i>lim</i> | The limit. |
|------------|------------|

### 9.141.3.3 `amin()` [1/2]

```
double LinkPred::Vec::amin ( ) const
```

#### Returns

The minimum absolute value in the vector.

### 9.141.3.4 `amin()` [2/2]

```
double LinkPred::Vec::amin (
    int lim ) const
```

#### Returns

The minimum absolute value in the vector up to `lim` number of elements.

#### Parameters

|            |            |
|------------|------------|
| <i>lim</i> | The limit. |
|------------|------------|

### 9.141.3.5 `axpy()`

```
void LinkPred::Vec::axpy (
    double a,
    Vec const & x )
```

Computes  $y = a * x + y$ , where `y` is the current object (this) and `x` is a full vector.

## Parameters

|          |                   |
|----------|-------------------|
| <i>a</i> | The value of a.   |
| <i>x</i> | The other vector. |

**9.141.3.6 center()** [1/2]

```
void LinkPred::Vec::center ( )
```

Center vector.

**9.141.3.7 center()** [2/2]

```
void LinkPred::Vec::center (
    int lim )
```

Center vector up to lim.

## Parameters

|            |            |
|------------|------------|
| <i>lim</i> | The limit. |
|------------|------------|

**9.141.3.8 find()**

```
std::vector<int> LinkPred::Vec::find (
    double val ) const
```

## Parameters

|            |                               |
|------------|-------------------------------|
| <i>val</i> | The avlue we are lookign for. |
|------------|-------------------------------|

## Returns

Indices of elements equal to val.

**9.141.3.9 findNz()**

```
std::vector<int> LinkPred::Vec::findNz ( ) const
```

## Returns

Indices of non-zero elements.

### 9.141.3.10 `getValues()`

```
double* LinkPred::Vec::getValues ( ) const [inline]
```

#### Returns

Array of values.

### 9.141.3.11 `ifmax()`

```
int LinkPred::Vec::ifmax ( ) const
```

#### Returns

The index of the first maximum value in the vector.

### 9.141.3.12 `ifmin()`

```
int LinkPred::Vec::ifmin ( ) const
```

#### Returns

The index of the first minimum value in the vector.

### 9.141.3.13 `ilmax()`

```
int LinkPred::Vec::ilmax ( ) const
```

#### Returns

The index of the last maximum value in the vector.

### 9.141.3.14 `ilmin()`

```
int LinkPred::Vec::ilmin ( ) const
```

#### Returns

The index of the last minimum value in the vector.

### 9.141.3.15 `imax()`

```
int LinkPred::Vec::imax ( ) const
```

#### Returns

The index of the maximum value in the vector.

### 9.141.3.16 `imin()`

```
int LinkPred::Vec::imin ( ) const
```

#### Returns

The index of the minimum value in the vector.

### 9.141.3.17 `isConstant()`

```
bool LinkPred::Vec::isConstant ( ) const [inline]
```

#### Returns

True if all entries of the vector are equal.

### 9.141.3.18 `makeConstant()`

```
bool LinkPred::Vec::makeConstant (
    double tol )
```

Check if the vector is constant (all entries are equal) up to a specific tolerance.

#### Parameters

|            |                |
|------------|----------------|
| <i>tol</i> | The tolerance. |
|------------|----------------|

#### Returns

True if the vector is constant.

**9.141.3.19 max()** [1/2]

```
double LinkPred::Vec::max ( ) const
```

**Returns**

The maximum value in the vector.

**9.141.3.20 max()** [2/2]

```
double LinkPred::Vec::max (
    int lim ) const
```

**Returns**

The maximum value in the vector up to *lim* number of elements.

**Parameters**

|            |            |
|------------|------------|
| <i>lim</i> | The limit. |
|------------|------------|

**9.141.3.21 mean()** [1/2]

```
double LinkPred::Vec::mean ( ) const
```

Computes the mean of the vector.

**Returns**

The mean of the vector.

**9.141.3.22 mean()** [2/2]

```
double LinkPred::Vec::mean (
    int lim ) const
```

Computes the mean of the vector.

**Returns**

The mean of the vector.

**9.141.3.23 min()** [1/2]

```
double LinkPred::Vec::min ( ) const
```

**Returns**

The minimum value in the vector.

**9.141.3.24 min()** [2/2]

```
double LinkPred::Vec::min (
    int lim ) const
```

**Returns**

The minimum value in the vector up to *lim* number of elements.

**Parameters**

|            |            |
|------------|------------|
| <i>lim</i> | The limit. |
|------------|------------|

**9.141.3.25 norm()** [1/2]

```
double LinkPred::Vec::norm ( ) const
```

Computes the norm of the vector.

**Returns**

The norm of the vector.

**9.141.3.26 norm()** [2/2]

```
double LinkPred::Vec::norm (
    int lim ) const
```

Computes the norm of the vector.

**Parameters**

|            |            |
|------------|------------|
| <i>lim</i> | The limit. |
|------------|------------|

**Returns**

The norm of the vector.

**9.141.3.27 operator"!=()**

```
bool LinkPred::Vec::operator!= (
    const Vec & other ) const
```

Overloads operator !=.

**Parameters**

|              |                   |
|--------------|-------------------|
| <i>other</i> | The other vector. |
|--------------|-------------------|

**Returns**

True if the the two vectors are not equal.

**9.141.3.28 operator=() [1/2]**

```
Vec& LinkPred::Vec::operator= (
    Vec && that )
```

Move assignment operator.

**Parameters**

|             |                     |
|-------------|---------------------|
| <i>that</i> | The object to move. |
|-------------|---------------------|

**9.141.3.29 operator=() [2/2]**

```
Vec& LinkPred::Vec::operator= (
    Vec const & that )
```

Copy assignment operator.

**Parameters**

|             |                     |
|-------------|---------------------|
| <i>that</i> | The object to copy. |
|-------------|---------------------|

### 9.141.3.30 operator==( )

```
bool LinkPred::Vec::operator== (
    const Vec & other ) const
```

Overloads operator ==.

#### Parameters

|              |                   |
|--------------|-------------------|
| <i>other</i> | The other vector. |
|--------------|-------------------|

#### Returns

True if the the two vectors are equal.

### 9.141.3.31 operator[]() [1/2]

```
double& LinkPred::Vec::operator[] (
    const int k ) [inline]
```

Overloaded subscript.

#### Parameters

|          |        |
|----------|--------|
| <i>k</i> | index. |
|----------|--------|

#### Returns

reference to the k'th entry.

### 9.141.3.32 operator[]() [2/2]

```
double LinkPred::Vec::operator[] (
    const int k ) const [inline]
```

Overloaded subscript.

#### Parameters

|          |        |
|----------|--------|
| <i>k</i> | index. |
|----------|--------|

#### Returns

the k'th entry.



### 9.141.3.33 partScale()

```
void LinkPred::Vec::partScale (
    int start,
    int nb,
    double a )
```

Scale part of the vector.

#### Parameters

|              |                                  |
|--------------|----------------------------------|
| <i>start</i> | The starting index.              |
| <i>nb</i>    | Number of elements to be scaled. |
| <i>a</i>     | The scale factor.                |

### 9.141.3.34 print() [1/4]

```
void LinkPred::Vec::print ( ) const
```

Print vector to standard output.

### 9.141.3.35 print() [2/4]

```
void LinkPred::Vec::print (
    std::ostream & out ) const
```

Print vector to output stream.

#### Parameters

|            |                    |
|------------|--------------------|
| <i>out</i> | The output stream. |
|------------|--------------------|

### 9.141.3.36 print() [3/4]

```
void LinkPred::Vec::print (
    std::ostream & out,
    std::string header ) const
```

Print vector to output stream.

## Parameters

|               |                    |
|---------------|--------------------|
| <i>out</i>    | The output stream. |
| <i>header</i> | Header.            |

**9.141.3.37 print()** [4/4]

```
void LinkPred::Vec::print (
    std::string header ) const
```

Print vector to standard output.

## Parameters

|               |         |
|---------------|---------|
| <i>header</i> | Header. |
|---------------|---------|

**9.141.3.38 read()** [1/2]

```
void LinkPred::Vec::read (
    std::ifstream * in )
```

Read the values from a text file.

## Parameters

|           |             |
|-----------|-------------|
| <i>in</i> | Input file. |
|-----------|-------------|

**9.141.3.39 read()** [2/2]

```
void LinkPred::Vec::read (
    std::string fileName )
```

Read the values from a text file.

## Parameters

|                 |                  |
|-----------------|------------------|
| <i>fileName</i> | Input file name. |
|-----------------|------------------|

**9.141.3.40 reset()** [1/2]

```
void LinkPred::Vec::reset ( )
```

Reset vector to 0.

**9.141.3.41 reset()** [2/2]

```
void LinkPred::Vec::reset (
    double val )
```

Reset vector to a specified value.

**Parameters**

|            |                                     |
|------------|-------------------------------------|
| <i>val</i> | All vector elements are set to val. |
|------------|-------------------------------------|

**9.141.3.42 resize()** [1/2]

```
void LinkPred::Vec::resize (
    int newSize )
```

Resize the vector.

**Parameters**

|                |                                                                          |
|----------------|--------------------------------------------------------------------------|
| <i>newSize</i> | The new size. If this is smaller than the current size, nothing happens. |
|----------------|--------------------------------------------------------------------------|

**9.141.3.43 resize()** [2/2]

```
void LinkPred::Vec::resize (
    int newSize,
    double val )
```

Resize the vector.

**Parameters**

|                |                                                                          |
|----------------|--------------------------------------------------------------------------|
| <i>newSize</i> | The new size. If this is smaller than the current size, nothing happens. |
| <i>val</i>     | Initialization value for new entries.                                    |

#### 9.141.3.44 `scale()`

```
void LinkPred::Vec::scale (
    double a )
```

Scale the vector by a scalar.

##### Parameters

|          |            |
|----------|------------|
| <i>a</i> | The scale. |
|----------|------------|

#### 9.141.3.45 `scatter()`

```
void LinkPred::Vec::scatter (
    int start,
    Vec const & v,
    int const * ind )
```

Scatter a vector into the current vector starting from given position.

##### Parameters

|              |                                                                       |
|--------------|-----------------------------------------------------------------------|
| <i>start</i> | The starting position.                                                |
| <i>v</i>     | The vector to be scattered.                                           |
| <i>ind</i>   | The index. Only entries in this array are affected by this operation. |

#### 9.141.3.46 `setConstant()`

```
void LinkPred::Vec::setConstant (
    bool constant ) [inline]
```

##### Parameters

|                 |                         |
|-----------------|-------------------------|
| <i>constant</i> | New value for constant. |
|-----------------|-------------------------|

#### 9.141.3.47 `size()`

```
int LinkPred::Vec::size ( ) const [inline]
```

##### Returns

The size of the vector.

### 9.141.3.48 sum()

```
double LinkPred::Vec::sum ( ) const
```

#### Returns

The sum of the elements of the vector.

### 9.141.3.49 write() [1/2]

```
void LinkPred::Vec::write (
    std::ofstream * out ) const
```

Write values to file.

#### Parameters

|            |              |
|------------|--------------|
| <i>out</i> | Output file. |
|------------|--------------|

### 9.141.3.50 write() [2/2]

```
void LinkPred::Vec::write (
    std::string fileName ) const
```

Write values to file.

#### Parameters

|                 |                   |
|-----------------|-------------------|
| <i>fileName</i> | Output file name. |
|-----------------|-------------------|

## 9.141.4 Friends And Related Function Documentation

### 9.141.4.1 operator\* [1/5]

```
Vec operator* (
    const GFMatrix & mat,
    const Vec & vec ) [friend]
```

GFMatrix-vector multiplication.

**Parameters**

|            |                                                   |
|------------|---------------------------------------------------|
| <i>mat</i> | The matrix.                                       |
| <i>vec</i> | The vector that will be multiplied by the matrix. |

**Returns**

The resulting vector.

**9.141.4.2 operator\* [2/5]**

```
Vec operator* (  
    double a,  
    Vec const & v ) [friend]
```

Scalar-vector multiplication.

**Parameters**

|          |             |
|----------|-------------|
| <i>a</i> | The scalar. |
| <i>v</i> | The vector. |

**Returns**

$a * v$ .

**9.141.4.3 operator\* [3/5]**

```
Vec operator* (  
    double a,  
    Vec const & v ) [friend]
```

Scalar-vector multiplication.

**Parameters**

|          |             |
|----------|-------------|
| <i>a</i> | The scalar. |
| <i>v</i> | The vector. |

**Returns**

$a * v$ .

#### 9.141.4.4 operator\* [4/5]

```
Vec operator* (
    Vec const & v,
    double a ) [friend]
```

Vector-scalar multiplication.

##### Parameters

|          |             |
|----------|-------------|
| <i>v</i> | The vector. |
| <i>a</i> | The scalar. |

##### Returns

$v * a$ .

#### 9.141.4.5 operator\* [5/5]

```
Vec operator* (
    Vec const & v1,
    Vec const & v2 ) [friend]
```

Vector element-wise multiplication.

##### Parameters

|           |                    |
|-----------|--------------------|
| <i>v1</i> | The first vector.  |
| <i>v2</i> | The second vector. |

##### Returns

$v1 .* v2$ .

#### 9.141.4.6 operator+ [1/3]

```
Vec operator+ (
    double a,
    Vec const & v ) [friend]
```

Scalar-vector addition.

##### Parameters

|          |             |
|----------|-------------|
| <i>a</i> | The scalar. |
| <i>v</i> | The vector. |

**Returns**

$a + v$ .

**9.141.4.7 operator+ [2/3]**

```
Vec operator+ (  
    Vec const & v,  
    double a ) [friend]
```

Vector-scalar addition.

**Parameters**

|     |             |
|-----|-------------|
| $v$ | The vector. |
| $a$ | The scalar. |

**Returns**

$v + a$ .

**9.141.4.8 operator+ [3/3]**

```
Vec operator+ (  
    Vec const & v1,  
    Vec const & v2 ) [friend]
```

Vector addition.

**Parameters**

|      |                    |
|------|--------------------|
| $v1$ | The first vector.  |
| $v2$ | The second vector. |

**Returns**

$v1 + v2$ .

**9.141.4.9 operator- [1/3]**

```
Vec operator- (  
    double a,  
    Vec const & v ) [friend]
```

Scalar-vector subtraction.



## Parameters

|     |             |
|-----|-------------|
| $a$ | The scalar. |
| $v$ | The vector. |

## Returns

$a - v$ .

**9.141.4.10 operator- [2/3]**

```
Vec operator- (  
    Vec const & v,  
    double a ) [friend]
```

Vector-scalar subtraction.

## Parameters

|     |             |
|-----|-------------|
| $v$ | The vector. |
| $a$ | The scalar. |

## Returns

$v - a$ .

**9.141.4.11 operator- [3/3]**

```
Vec operator- (  
    Vec const & v1,  
    Vec const & v2 ) [friend]
```

Vector subtraction.

## Parameters

|      |                    |
|------|--------------------|
| $v1$ | The first vector.  |
| $v2$ | The second vector. |

## Returns

$v1 - v2$ .

**9.141.4.12 operator/ [1/3]**

```
Vec operator/ (
    double a,
    Vec const & v ) [friend]
```

Scalar-vector division.

**Parameters**

|          |             |
|----------|-------------|
| <i>a</i> | The scalar. |
| <i>v</i> | The vector. |

**Returns**

$a / v$ .

**9.141.4.13 operator/ [2/3]**

```
Vec operator/ (
    Vec const & v,
    double a ) [friend]
```

Vector-scalar division.

**Parameters**

|          |             |
|----------|-------------|
| <i>v</i> | The vector. |
| <i>a</i> | The scalar. |

**Returns**

$v / a$ .

**9.141.4.14 operator/ [3/3]**

```
Vec operator/ (
    Vec const & v1,
    Vec const & v2 ) [friend]
```

Vector element-wise division.

**Parameters**

|           |                    |
|-----------|--------------------|
| <i>v1</i> | The first vector.  |
| <i>v2</i> | The second vector. |

**Returns**

$v1 ./ v2$ .

**9.141.4.15 operator<sup>^</sup>**

```
double operator^ (
    Vec const & v1,
    Vec const & v2 ) [friend]
```

Dot product.

**Parameters**

|           |                    |
|-----------|--------------------|
| <i>v1</i> | The first vector.  |
| <i>v2</i> | The second vector. |

**Returns**

$v1' * v2$ .

The documentation for this class was generated from the following file:

- `include/linkpred/numerical/linear/vec.hpp`



## Chapter 10

# File Documentation

### 10.1 bindings/Java/include/LinkPredJavaConfig.hpp File Reference

Contains configuration options.

#### Macros

- `#define LinkPredJava_VERSION_MAJOR 1`
- `#define LinkPredJava_VERSION_MINOR 0`
- `#define LinkPredJava_VERSION_PATCH 0`

#### 10.1.1 Detailed Description

Contains configuration options.

### 10.2 bindings/Python/include/LinkPredPythonConfig.hpp File Reference

Contains configuration options.

#### Macros

- `#define LinkPredPython_VERSION_MAJOR 1`
- `#define LinkPredPython_VERSION_MINOR 0`
- `#define LinkPredPython_VERSION_PATCH 0`
- `#define LINKPRED_WITH_OPENMP`
- `#define LINKPRED_WITH_MPI`
- `#define LINKPRED_WITH_MLPACK`

#### 10.2.1 Detailed Description

Contains configuration options.

## 10.3 include/LinkPredConfig.hpp File Reference

Contains configuration options.

This graph shows which files directly or indirectly include this file:

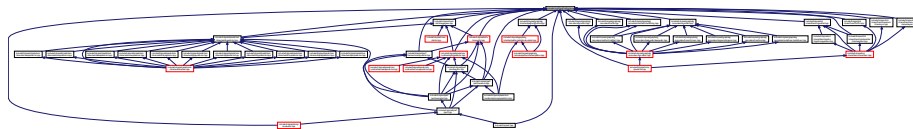

### Macros

- `#define LinkPred_VERSION_MAJOR 1`
- `#define LinkPred_VERSION_MINOR 0`
- `#define LinkPred_VERSION_PATCH 0`

### 10.3.1 Detailed Description

Contains configuration options.

## 10.4 include/linkpred.hpp File Reference

Includes all headers of the library.

```
#include "LinkPredConfig.hpp"
#include "linkpred/core/core.hpp"
#include "linkpred/graphalg/graphalg.hpp"
#include "linkpred/predictors/predictors.hpp"
#include "linkpred/perf/perf.hpp"
#include "linkpred/utils/utils.hpp"
#include "linkpred/ml/ml.hpp"
#include "linkpred/numerical/numerical.hpp"
#include "linkpred/simp/simp.hpp"
```

Include dependency graph for linkpred.hpp:

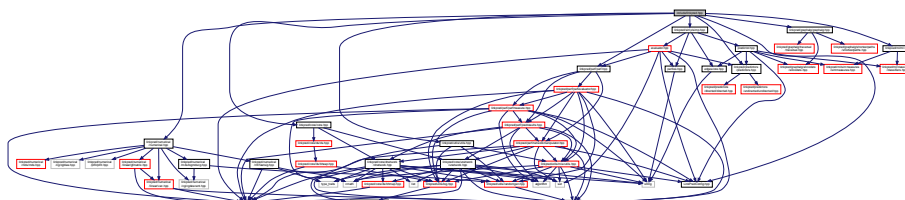

### Namespaces

- [LinkPred](#)  
*Main namespace.*



## 10.6 include/linkpred/core/dnetwork/dnetwork.hpp File Reference

Contains the implementation of a directed network data structure.

```
#include "linkpred/utils/log.hpp"
#include "linkpred/core/ds/bhmap.hpp"
#include "linkpred/utils/randomgen.hpp"
#include <cmath>
#include <memory>
#include <vector>
#include <list>
#include <set>
#include <algorithm>
#include <type_traits>
#include <string>
```

Include dependency graph for dnetwork.hpp:

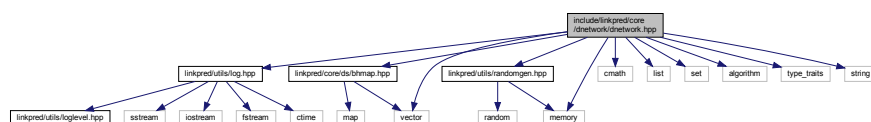

This graph shows which files directly or indirectly include this file:

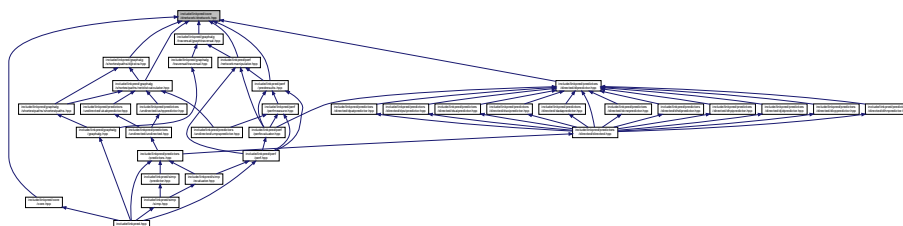

### Classes

- class [LinkPred::DNetwork< LabelT, NodeIDT, EdgeT >](#)  
*This class represents a directed network in the sense of graph theory.*
- class [LinkPred::DNetwork< LabelT, NodeIDT, EdgeT >::NodeDegIt](#)  
*Node-degree iterator. This class can be used to iterate over pairs of node IDs and in and out degrees.*
- class [LinkPred::DNetwork< LabelT, NodeIDT, EdgeT >::NonEdgeIt](#)  
*Nonedges iterator.*
- class [LinkPred::DNetwork< LabelT, NodeIDT, EdgeT >::RndNodeIt](#)  
*Randomized Nodes iterator.*
- class [LinkPred::DNetwork< LabelT, NodeIDT, EdgeT >::RndEdgeIt](#)  
*Randomized edges iterator.*
- class [LinkPred::DNetwork< LabelT, NodeIDT, EdgeT >::RndNonEdgeIt](#)  
*Randomized nonedges iterator.*
- class [LinkPred::DNetwork< LabelT, NodeIDT, EdgeT >::NodeMap< ValueType >](#)  
*A node map.*
- class [LinkPred::DNetwork< LabelT, NodeIDT, EdgeT >::NodeSMap< ValueType >](#)  
*A sparse node map.*
- class [LinkPred::DNetwork< LabelT, NodeIDT, EdgeT >::EdgeMap< ValueType >](#)  
*An edge map.*



## Namespaces

- [LinkPred](#)

*Main namespace.*

### 10.6.1 Detailed Description

Contains the implementation of a directed network data structure.

## 10.7 include/linkpred/core/ds/bheap.hpp File Reference

Contains the implementation of a templated binary heap.

```
#include "linkpred/utis/log.hpp"
#include <vector>
#include <map>
#include <iostream>
```

Include dependency graph for bheap.hpp:

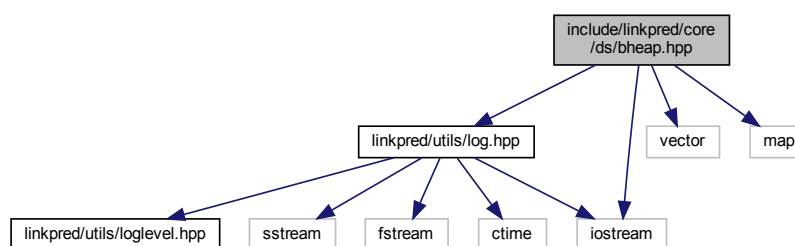

This graph shows which files directly or indirectly include this file:

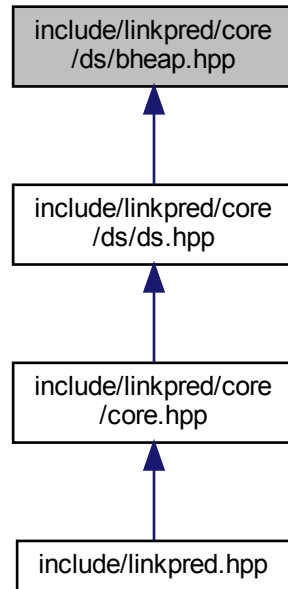

## Classes

- class [LinkPred::BHeap< T, P, ComparatorT, ComparatorP >](#)  
*A binary heap.*

## Namespaces

- [LinkPred](#)  
*Main namespace.*

### 10.7.1 Detailed Description

Contains the implementation of a templated binary heap.

## 10.8 include/linkpred/core/ds/bhmap.hpp File Reference

Contains the implementation of a templated bidirectional half map.

```
#include <map>
#include <vector>
Include dependency graph for bhmap.hpp:
```

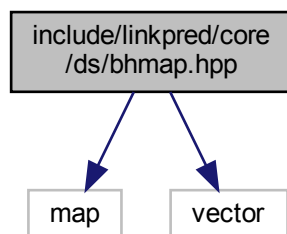

This graph shows which files directly or indirectly include this file:

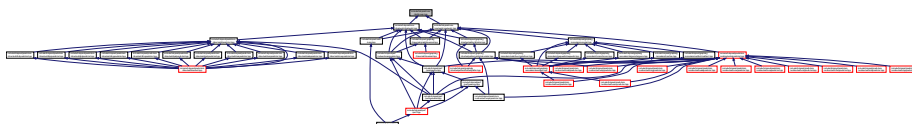

## Classes

- class [LinkPred::Bhmap< K, P, Comparator >](#)  
*A bidirectional half map.*

## Namespaces

- [LinkPred](#)  
*Main namespace.*

### 10.8.1 Detailed Description

Contains the implementation of a templated bidirectional half map.

## 10.9 include/linkpred/core/ds/ds.hpp File Reference

Includes the headers related to data structures.

```
#include "linkpred/core/ds/bheap.hpp"
#include "linkpred/core/ds/lmapqueue.hpp"
Include dependency graph for ds.hpp:
```

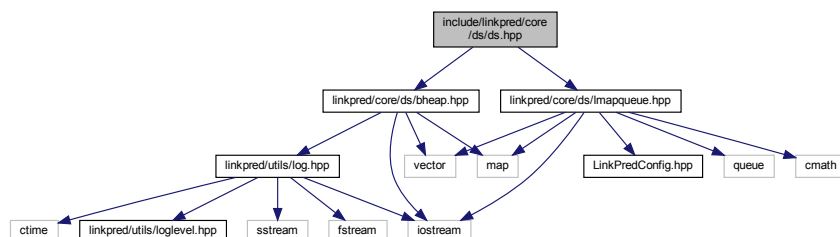

This graph shows which files directly or indirectly include this file:

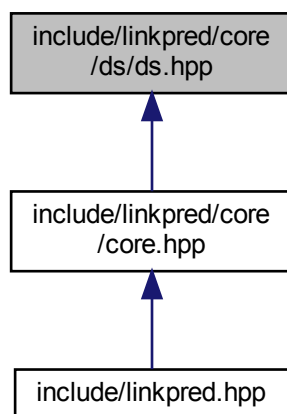

### 10.9.1 Detailed Description

Includes the headers related to data structures.

## 10.10 include/linkpred/core/ds/lmapqueue.hpp File Reference

Contains the implementation of a templated map-priority queue with limit on the capacity.

```
#include "LinkPredConfig.hpp"
#include <map>
#include <queue>
#include <vector>
#include <iostream>
```

```
#include <cmath>
```

Include dependency graph for Lmapqueue.hpp:

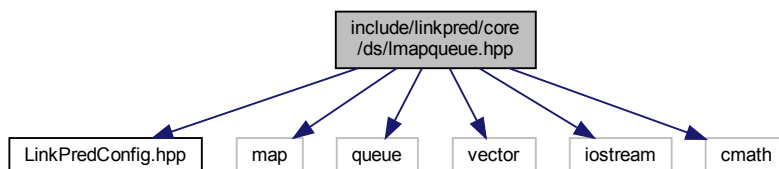

This graph shows which files directly or indirectly include this file:

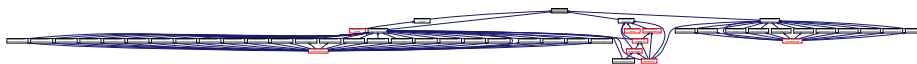

## Classes

- class [LinkPred::LMapQueue< K, P, KComparator, PComparator >](#)  
A map-priority queue with limit on the capacity.

## Namespaces

- [LinkPred](#)  
Main namespace.

### 10.10.1 Detailed Description

Contains the implementation of a templated map-priority queue with limit on the capacity.

## 10.11 include/linkpred/core/unetwork/unetwork.hpp File Reference

Contains the implementation of an undirected network data structure.

```

#include "linkpred/utils/log.hpp"
#include "linkpred/core/ds/bhmap.hpp"
#include "linkpred/utils/randomgen.hpp"
#include <cmath>
#include <memory>
#include <vector>
#include <list>
#include <set>
#include <algorithm>
#include <type_traits>

```

```
#include <string>
```

Include dependency graph for unetwork.hpp:

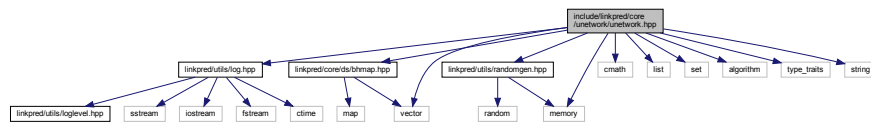

This graph shows which files directly or indirectly include this file:

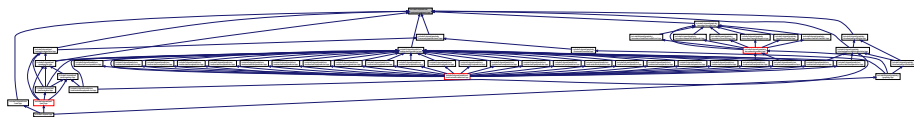

## Classes

- class [LinkPred::UNetwork< LabelT, NodeIDT, EdgeT >](#)  
*This class represents an undirected network in the sense of graph theory.*
- class [LinkPred::UNetwork< LabelT, NodeIDT, EdgeT >::NodeDegIt](#)  
*Node-degree iterator. This class can be used to iterate over pairs of node IDs and degrees.*
- class [LinkPred::UNetwork< LabelT, NodeIDT, EdgeT >::NonEdgeIt](#)  
*Nonedges iterator.*
- class [LinkPred::UNetwork< LabelT, NodeIDT, EdgeT >::RndNodeIt](#)  
*Randomized Nodes iterator.*
- class [LinkPred::UNetwork< LabelT, NodeIDT, EdgeT >::RndEdgeIt](#)  
*Randomized edges iterator.*
- class [LinkPred::UNetwork< LabelT, NodeIDT, EdgeT >::RndNonEdgeIt](#)  
*Randomized nonedges iterator.*
- class [LinkPred::UNetwork< LabelT, NodeIDT, EdgeT >::NodeMap< ValueType >](#)  
*A node map.*
- class [LinkPred::UNetwork< LabelT, NodeIDT, EdgeT >::NodeSMap< ValueType >](#)  
*A sparse node map.*
- class [LinkPred::UNetwork< LabelT, NodeIDT, EdgeT >::EdgeMap< ValueType >](#)  
*An edge map.*

## Namespaces

- [LinkPred](#)  
*Main namespace.*

### 10.11.1 Detailed Description

Contains the implementation of an undirected network data structure.

## 10.12 include/linkpred/graphalg/encoders/deepwalk/deepwalk.hpp File Reference

DeepWalk encoder.

```
#include "linkpred/graphalg/encoders/encoder.hpp"
#include "linkpred/utlis/randomgen.hpp"
#include "linkpred/numerical/mf/fastsig.hpp"
#include <cmath>
#include <stdexcept>
#include <cstddef>
```

Include dependency graph for deepwalk.hpp:

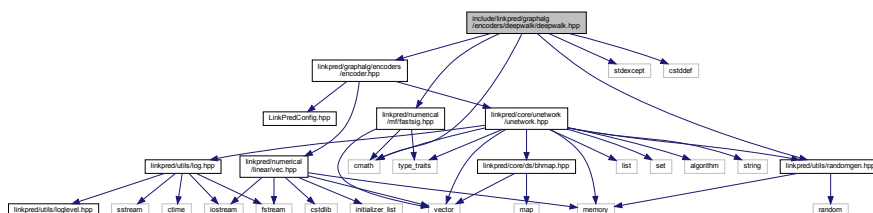

This graph shows which files directly or indirectly include this file:

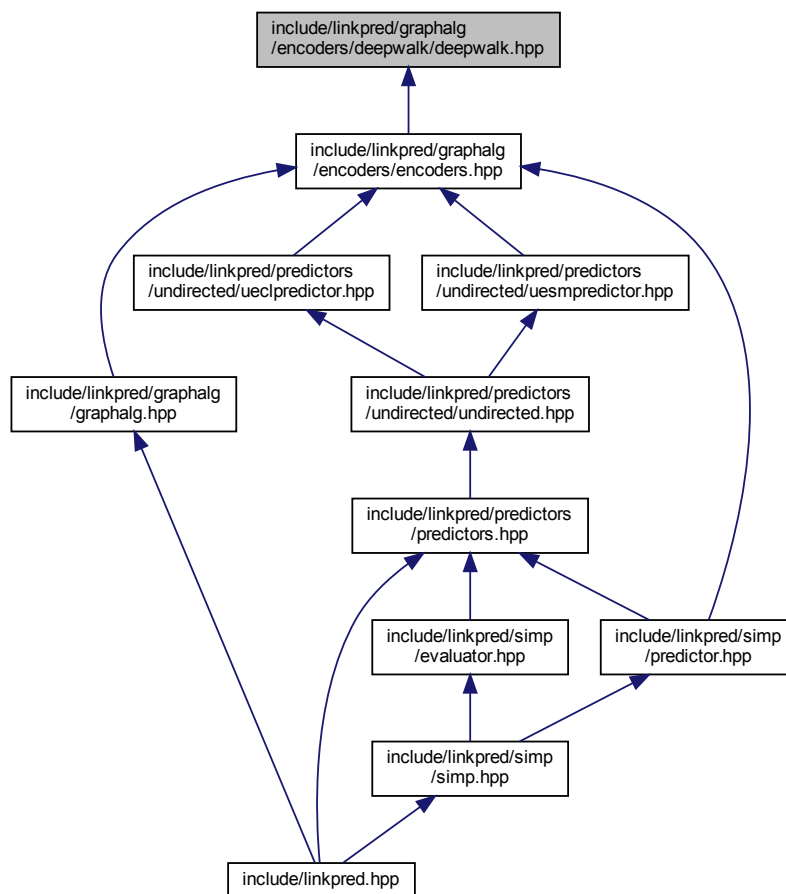

## Classes

- class [LinkPred::DeepWalk< Network >](#)

*DeepWalk* encoder. Reference: Perozzi, B., Al-Rfou, R., and Skiena, S. (2014). Deepwalk: Online learning of social representations. In *Proceedings of the 20th ACM SIGKDD International Conference on Knowledge Discovery and Data Mining, KDD '14*, pages 701–710, New York, NY, USA. Association for Computing Machinery. This implementation is based on the code <https://github.com/xgfs/deepwalk-c>.

## Namespaces

- [LinkPred](#)

Main namespace.

### 10.12.1 Detailed Description

DeepWalk encoder.



## 10.13 include/linkpred/graphalg/encoders/encoder.hpp File Reference

Contains the interface of a network encoder.

```
#include "LinkPredConfig.hpp"
#include "linkpred/core/unetwork/unetwork.hpp"
#include "linkpred/numerical/linear/vec.hpp"
Include dependency graph for encoder.hpp:
```

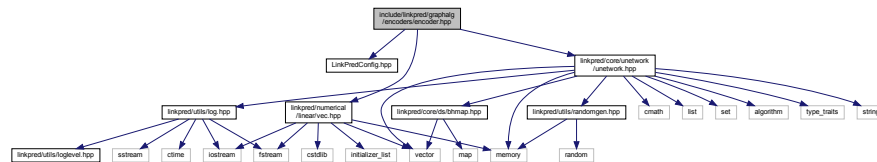

This graph shows which files directly or indirectly include this file:

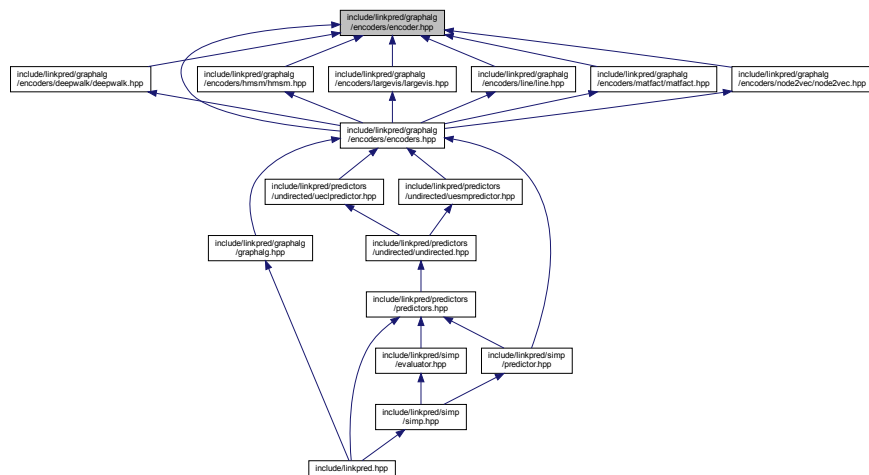

### Classes

- class [LinkPred::Encoder< Network >](#)  
The interface of a network encoder.

### Namespaces

- [LinkPred](#)  
Main namespace.

#### 10.13.1 Detailed Description

Contains the interface of a network encoder.





This graph shows which files directly or indirectly include this file:

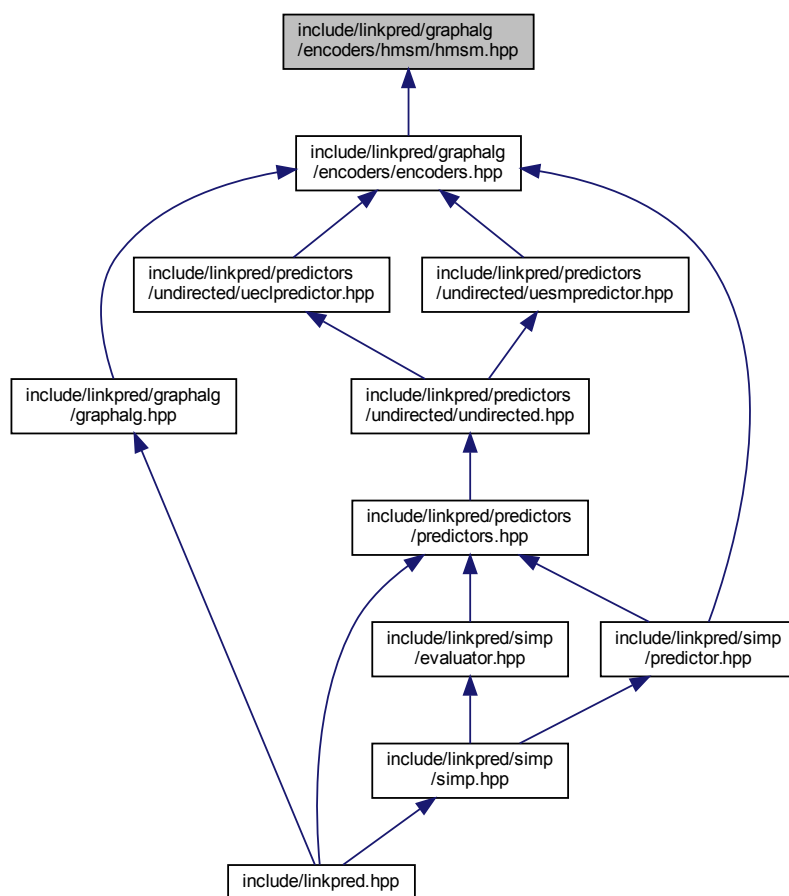

## Classes

- class [LinkPred::HMSM< Network >](#)

Contains the implementation of an algorithm for embedding a network using a a hidden metric space model. Reference: R. Alharbi, H. Benhidour, and S. Kerrache. "Link Prediction in Complex Net-works Based on a Hidden Variables Model". In: 2016 UKSim-AMSS 18th Inter-national Conference on Computer Modelling and Simulation (UKSim). 2016,pages 119–124.

## Namespaces

- [LinkPred](#)

Main namespace.

### 10.15.1 Detailed Description

Contains the implementation of an algorithm for embedding a network using a a hidden metric space model.

LargeVis encoder.

Include dependency graph for largevis.hpp:

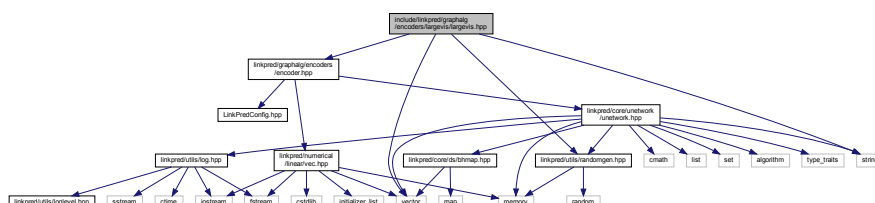

This graph shows which files directly or indirectly include this file:

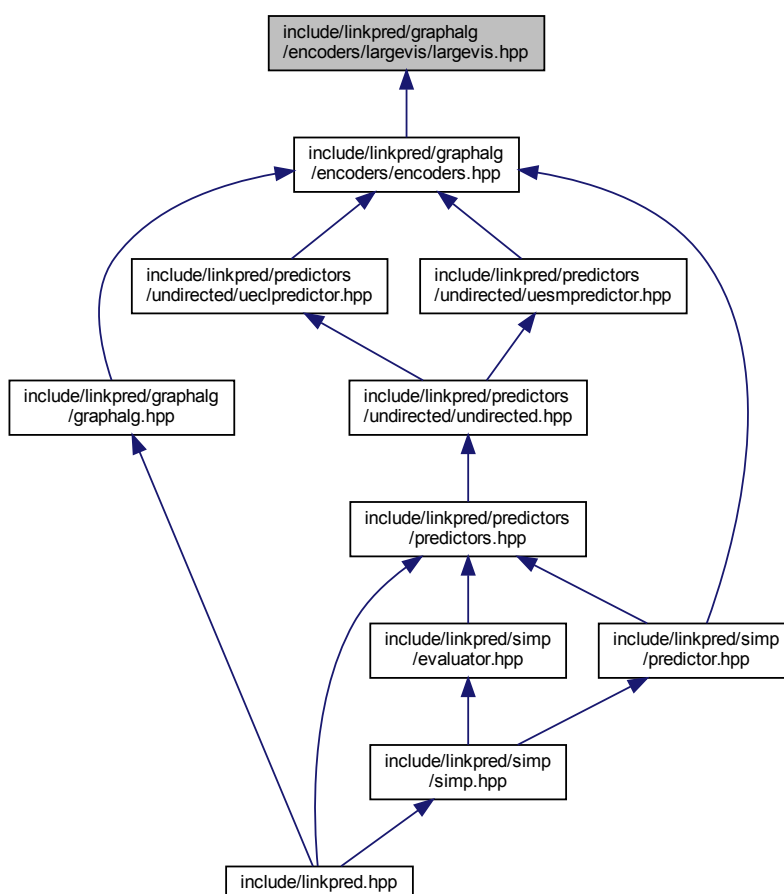

## Classes

- class [LinkPred::LargeVis](#)< [Network](#) >

[LargeVis](#) encoder. Reference: Tang, J., Liu, J., Zhang, M., and Mei, Q. (2016b). Visualizing large-scale and high-dimensional data. In Bourdeau, J., Hendler, J., Nkambou, R., Horrocks, I., and Zhao, B. Y., editors, WWW, pages 287–297. ACM. This implementation is based on the code <https://github.com/lferry007/LargeVis>.

## Namespaces

- [LinkPred](#)

Main namespace.

### 10.16.1 Detailed Description

LargeVis encoder.

## 10.17 include/linkpred/graphalg/encoders/lem/lem.hpp File Reference

Contains the implementation of Laplacian eigenmaps embedding (LEM).

```
#include "LinkPredConfig.hpp"
```

Include dependency graph for lem.hpp:

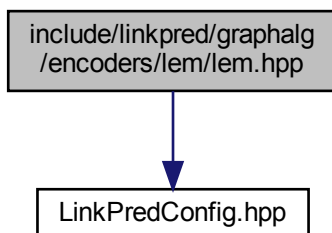

This graph shows which files directly or indirectly include this file:

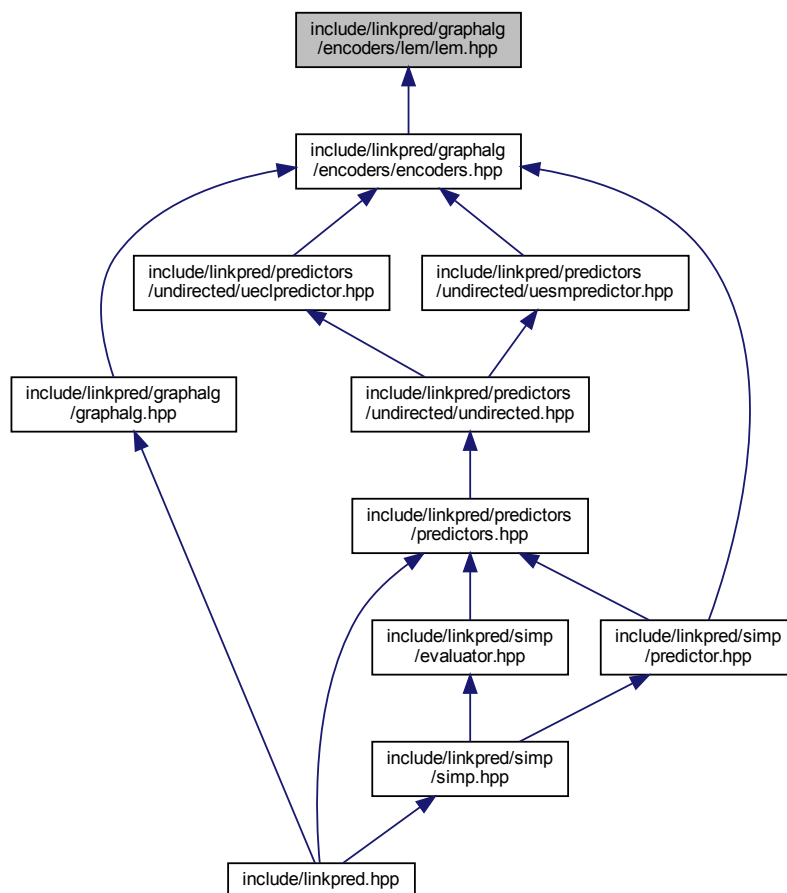

### 10.17.1 Detailed Description

Contains the implementation of Laplacian eigenmaps embedding (LEM).

## 10.18 include/linkpred/graphalg/encoders/line/line.hpp File Reference

The LINE (Large-scale Information Network Embedding) encoder.

```

#include "linkpred/graphalg/encoders/encoder.hpp"
#include "linkpred/utils/randomgen.hpp"
#include "linkpred/numerical/mf/fastsig.hpp"
#include <cmath>

```

```
#include <stdexcept>
```

Include dependency graph for line.hpp:

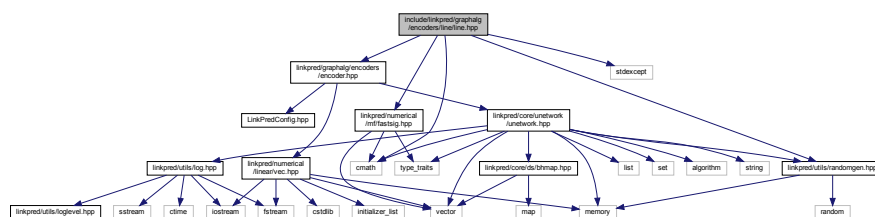

This graph shows which files directly or indirectly include this file:

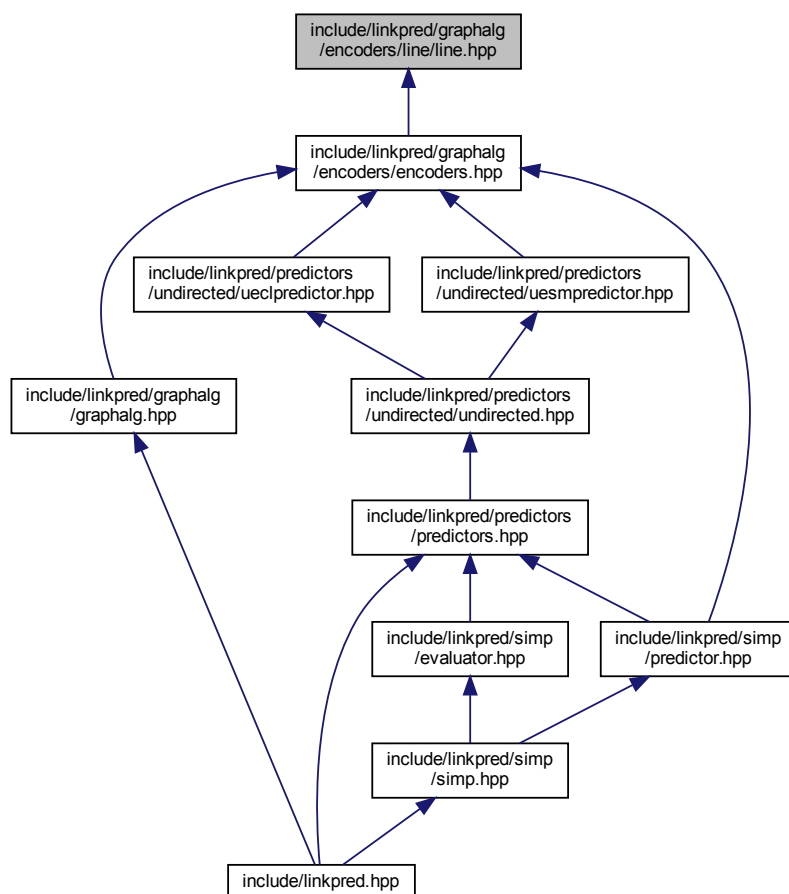

## Classes

- class [LinkPred::LINE< Network >](#)  
*LINE* encoder.



## Namespaces

- [LinkPred](#)

*Main namespace.*

### 10.18.1 Detailed Description

The LINE (Large-scale Information Network Embedding) encoder.

## 10.19 include/linkpred/graphalg/encoders/lle/lle.hpp File Reference

Contains the implementation of locally linear graph embedding (LLE).

```
#include "LinkPredConfig.hpp"
```

Include dependency graph for lle.hpp:

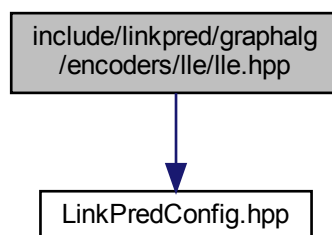

This graph shows which files directly or indirectly include this file:

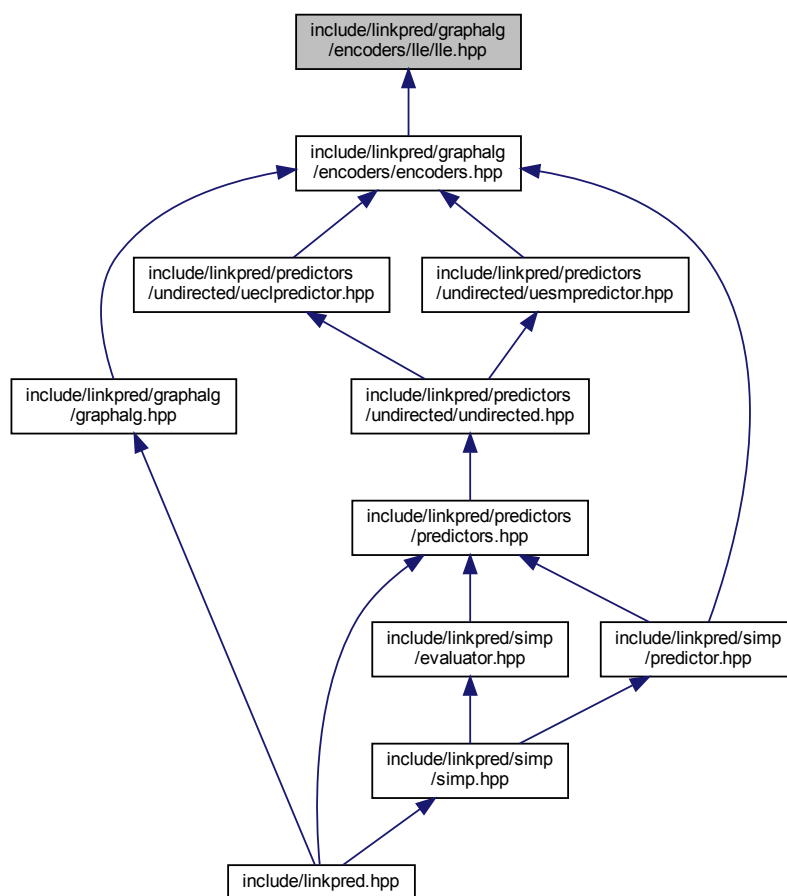

### 10.19.1 Detailed Description

Contains the implementation of locally linear graph embedding (LLE).

## 10.20 include/linkpred/graphalg/encoders/matfact/matfact.hpp File Reference

Contains the implementation of an algorithm for embedding a network using matrix factorization. Reference: Koren, Y., Bell, R., and Volinsky, C. (2009). Matrix factorization techniques for recommender systems. *Computer*, 42(8):30–37 Ahmed, A., Shervashidze, N., Narayanamurthy, S., Josifovski, V., and Smola, A. J. (2013). Distributed large-scale natural graph factorization. In *Proceedings of the 22nd International Conference on World Wide Web, WWW '13*, pages 37–48, New York, NY, USA. Association for Computing Machinery.

```
#include "linkpred/graphalg/encoders/encoder.hpp"
#include "linkpred/graphalg/encoders/matfact/matfactcg.hpp"
#include "linkpred/utils/randomgen.hpp"
```

```
#include <cmath>
```

Include dependency graph for matfact.hpp:

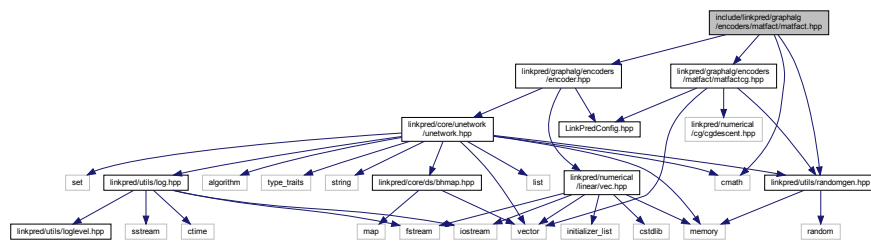

This graph shows which files directly or indirectly include this file:

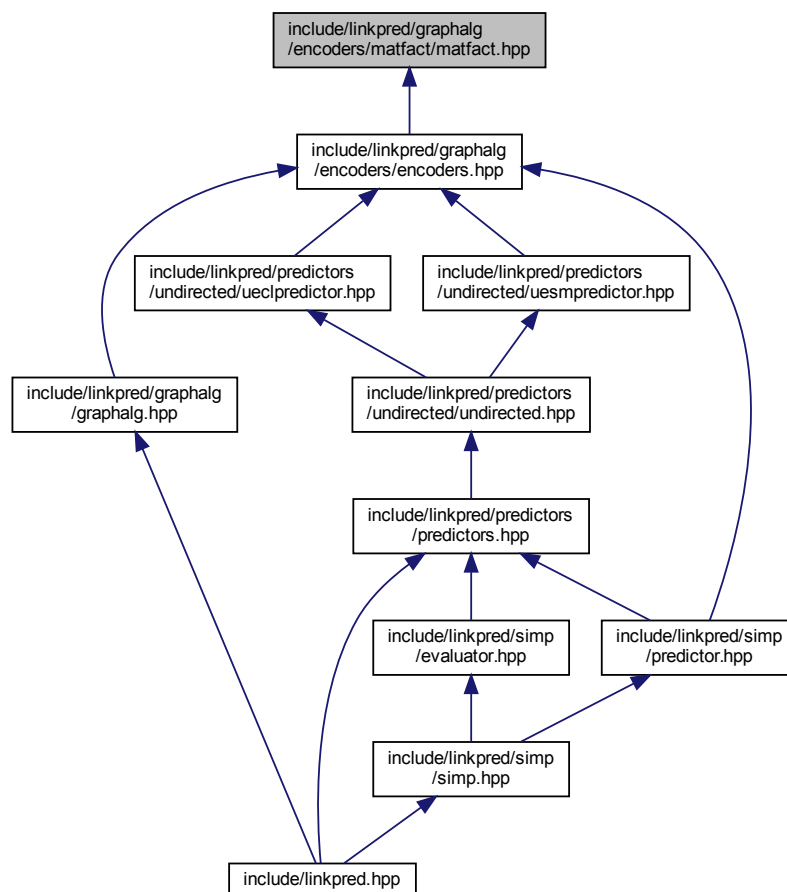

## Classes

- class [LinkPred::MatFact< Network >](#)

Contains the implementation of an algorithm for embedding a network using matrix factorization. Reference: Koren, Y., Bell, R., and Volinsky, C. (2009). Matrix factorization techniques for recommender systems. *Computer*, 42(8):30–37 Ahmed, A., Shervashidze, N., Narayanamurthy, S., Josifovski, V., and Smola, A. J. (2013). Distributed large-scale natural graph factorization. In *Proceedings of the 22nd International Conference on World Wide Web, WWW '13*, pages 37–48, New York, NY, USA. Association for Computing Machinery.

## Namespaces

- [LinkPred](#)

*Main namespace.*

### 10.20.1 Detailed Description

Contains the implementation of an algorithm for embedding a network using matrix factorization. Reference: Koren, Y., Bell, R., and Volinsky, C. (2009). Matrix factorization techniques for recommender systems. *Computer*, 42(8):30–37 Ahmed, A., Shervashidze, N., Narayanamurthy, S., Josifovski, V., and Smola, A. J. (2013). Distributed large-scale natural graph factorization. In *Proceedings of the 22nd International Conference on World Wide Web, WWW '13*, pages 37–48, New York, NY, USA. Association for Computing Machinery.

### 10.21 `include/linkpred/graphalg/encoders/matfact/matfactcg.hpp` File Reference

Contains the implementation of the optimization problem associated with matrix factorization.

```
#include "LinkPredConfig.hpp"
#include "linkpred/numerical/cg/cgdescent.hpp"
#include "linkpred/utils/randomgen.hpp"
#include <vector>
```

Include dependency graph for `matfactcg.hpp`:

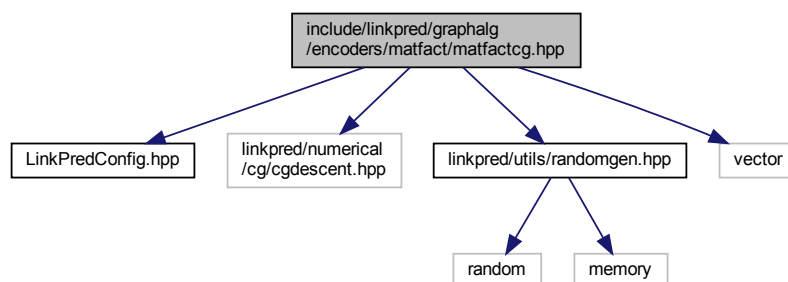

This graph shows which files directly or indirectly include this file:

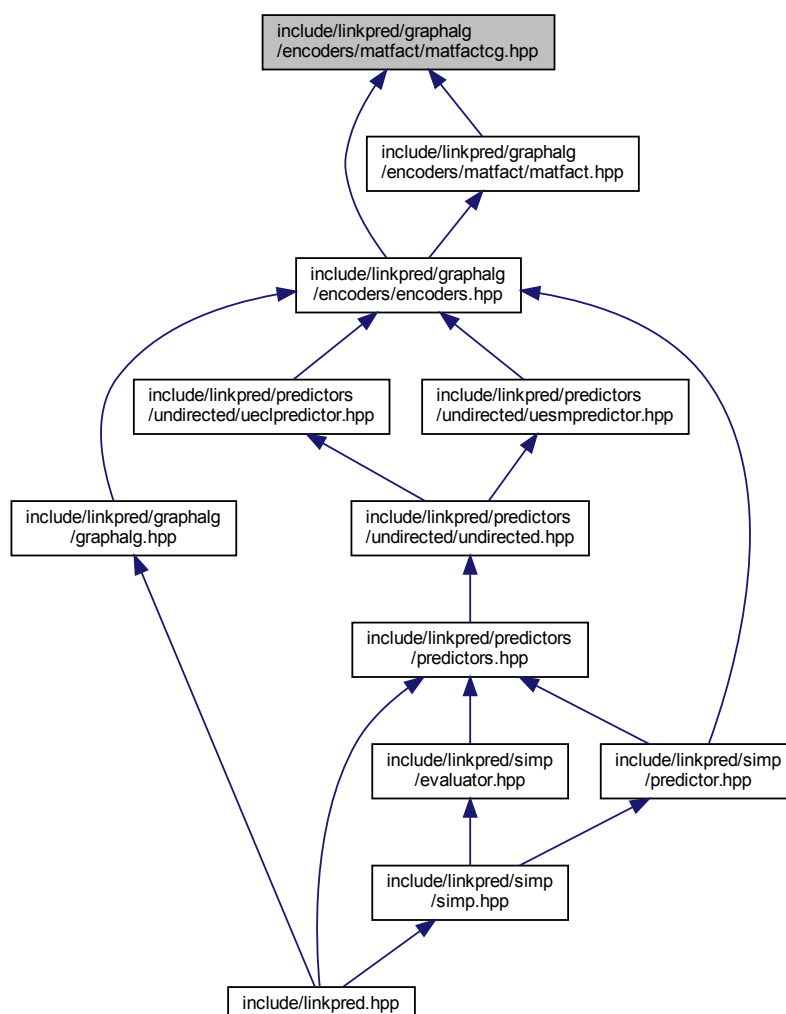

## Classes

- struct [LinkPred::MatFactPbData](#)  
A simple structure to store matrix factioization problem data.
- class [LinkPred::MatFactCG](#)  
Optimization problem associated with matrix factorization.

## Namespaces

- [LinkPred](#)  
Main namespace.

### 10.21.1 Detailed Description

Contains the implementation of the optimization problem associated with matrix factorization.



## Classes

- class [LinkPred::Node2Vec< Network >](#)

[Node2Vec](#) encoder. References: Grover, A. and Leskovec, J. (2016). Node2vec: Scalable feature learning for networks. In *Proceedings of the 22nd ACM SIGKDD International Conference on Knowledge Discovery and Data Mining, KDD'16*, pages 855–864, New York, NY, USA. Association for Computing Machinery. This implementation is based on the code <https://github.com/xgfs/node2vec-c>.

## Namespaces

- [LinkPred](#)

Main namespace.

### 10.22.1 Detailed Description

A node2vec encoder.

## 10.23 include/linkpred/graphalg/graphalg.hpp File Reference

Includes the headers related to graph algorithms.

```
#include "linkpred/graphalg/encoders/encoders.hpp"
#include "linkpred/graphalg/shortestpaths/shortestpaths.hpp"
#include "linkpred/graphalg/traversal/traversal.hpp"
Include dependency graph for graphalg.hpp:
```

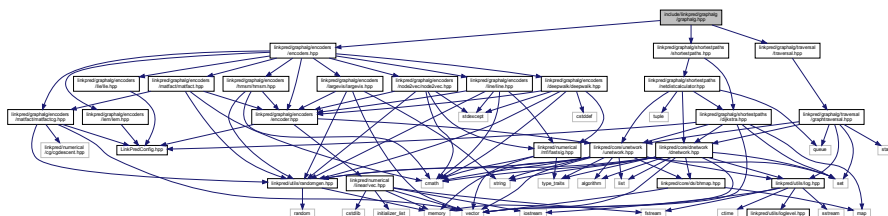

This graph shows which files directly or indirectly include this file:

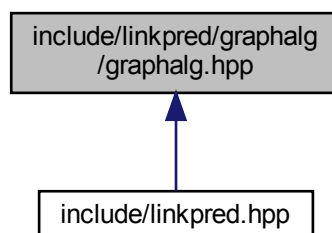

### 10.23.1 Detailed Description

Includes the headers related to graph algorithms.

## 10.24 include/linkpred/graphalg/shortestpaths/dijkstra.hpp File Reference

Contains an implementation of Dijkstra's algorithm.

```
#include "LinkPredConfig.hpp"
#include "linkpred/core/unetwork/unetwork.hpp"
#include "linkpred/core/dnetwork/dnetwork.hpp"
#include <map>
#include <set>
#include <vector>
```

Include dependency graph for dijkstra.hpp:

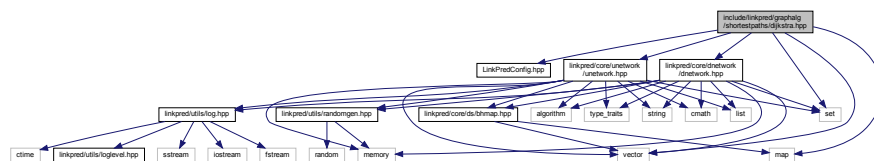

This graph shows which files directly or indirectly include this file:

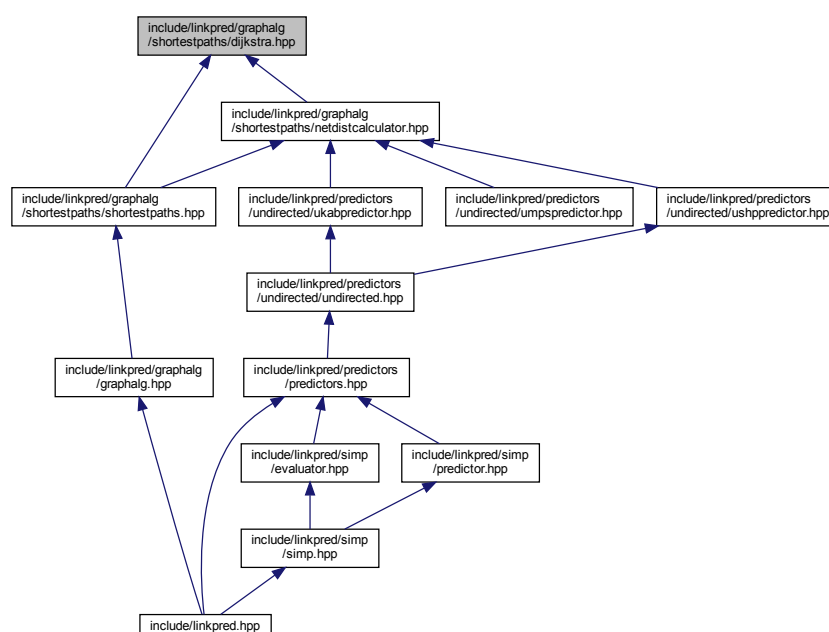



## Classes

- class [LinkPred::Dijkstra](#)< Network, DistType, NbHopsType >

An implementation of [Dijkstra](#)'s algorithm.

## Namespaces

- [LinkPred](#)

Main namespace.

### 10.24.1 Detailed Description

Contains an implementation of Dijkstra's algorithm.

## 10.25 include/linkpred/graphalg/shortestpaths/netdistcalculator.hpp File Reference

Contains the implementation of classes for computing distances in network.

```
#include "linkpred/core/unetwork/unetwork.hpp"
#include "linkpred/core/dnetwork/dnetwork.hpp"
#include "linkpred/graphalg/shortestpaths/dijkstra.hpp"
#include <tuple>
#include <queue>
```

Include dependency graph for netdistcalculator.hpp:

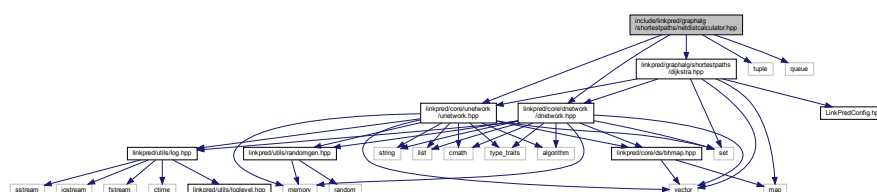

This graph shows which files directly or indirectly include this file:

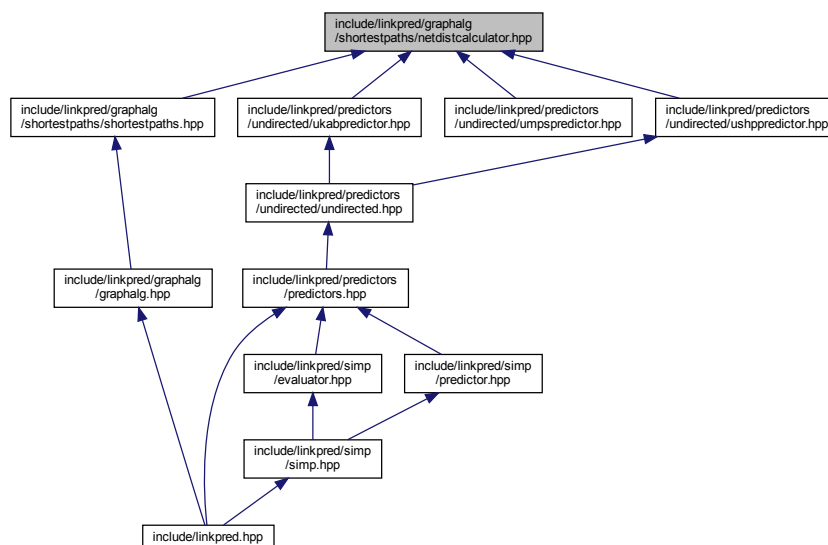

## Classes

- class [LinkPred::NetDistCalculator< Network, DistType, NbHopsType >](#)  
*Interface for calculating the distance between nodes in a network.*
- class [LinkPred::NetSimlCalculator< Network, DistType, NbHopsType >](#)  
*Interface for calculating the similarity between nodes in a network.*
- class [LinkPred::NetIndSimlCalculator< Network, DistType, NbHopsType >](#)  
*Interface for calculating the indirect similarity between nodes in a network.*
- class [LinkPred::ESPDistCalculator< Network, DistType, NbHopsType >](#)  
*Exact shortest path distance calculator.*
- class [LinkPred::ESPLDistCalculator< Network, DistType, NbHopsType >](#)  
*Exact shortest path distance calculator with limits on the number of hops.*
- class [LinkPred::ASPDistCalculator< Network, DistType, NbHopsType >](#)  
*Approximate shortest path distance calculator.*
- class [LinkPred::ESPDsimCalculator< Network, DsimType, NbHopsType >](#)  
*Exact shortest path dissimilarity calculator.*
- class [LinkPred::ASPDsimCalculator< Network, DsimType, NbHopsType >](#)  
*Approximate shortest path dissimilarity calculator.*
- class [LinkPred::ESPSimlCalculator< Network, DistType, NbHopsType >](#)  
*Exact shortest path distance calculator.*
- class [LinkPred::ESPLSimlCalculator< Network, DistType, NbHopsType >](#)  
*Exact shortest path distance calculator.*
- class [LinkPred::ESPIndSimlCalculator< Network, DistType, NbHopsType >](#)  
*Exact shortest path distance calculator.*
- class [LinkPred::DESPLDistCalculator< Network, DistType, NbHopsType >](#)  
*Exact shortest path distance calculator on a directed network with limits on the number of hops.*

## Namespaces

- [LinkPred](#)

*Main namespace.*

## Enumerations

- enum [LinkPred::CacheLevel](#) { [LinkPred::NoCache](#), [LinkPred::NodeCache](#), [LinkPred::NetworkCache](#) }

*Cache levels.*

### 10.25.1 Detailed Description

Contains the implementation of classes for computing distances in network.

## 10.26 include/linkpred/graphalg/shortestpaths/shortestpaths.hpp File Reference

Includes the headers related to shortest paths algorithms.

```
#include "linkpred/graphalg/shortestpaths/dijkstra.hpp"
#include "linkpred/graphalg/shortestpaths/netdistcalculator.hpp"
Include dependency graph for shortestpaths.hpp:
```

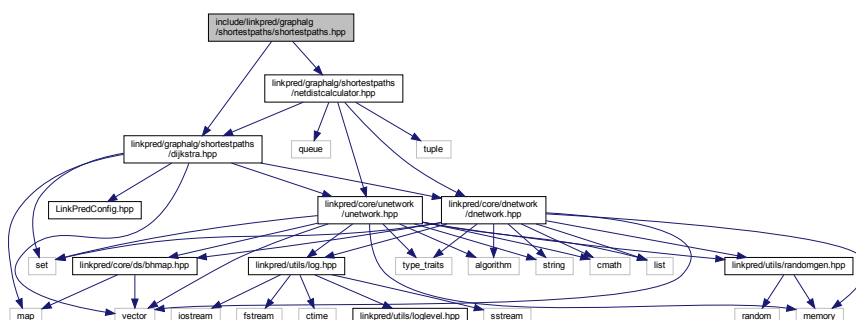

This graph shows which files directly or indirectly include this file:

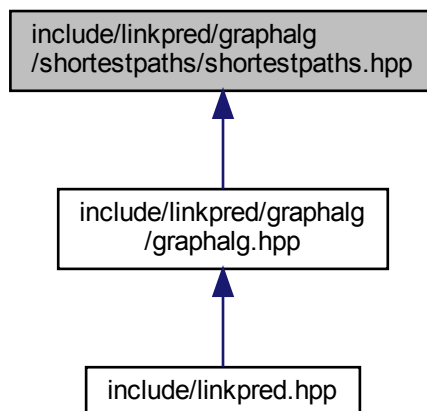

### 10.26.1 Detailed Description

Includes the headers related to shortest paths algorithms.

## 10.27 include/linkpred/graphalg/traversal/graphtraversal.hpp File Reference

Contains the implementation of graph traversal algorithms.

```

#include "linkpred/core/unetwork/unetwork.hpp"
#include "linkpred/core/dnetwork/dnetwork.hpp"
#include "linkpred/utils/log.hpp"
#include <queue>
#include <stack>
#include <set>

```

Include dependency graph for graphtraversal.hpp:

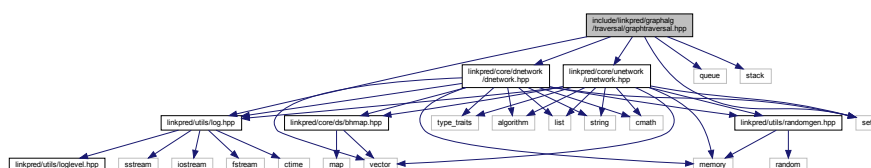

This graph shows which files directly or indirectly include this file:

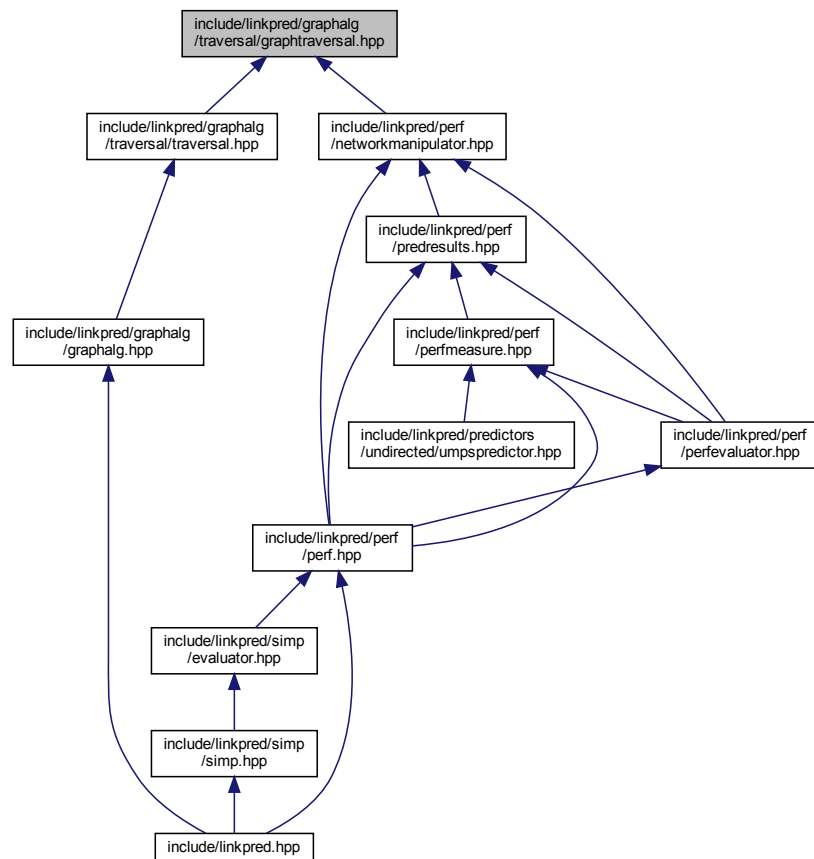

## Classes

- class [LinkPred::Counter< Network >](#)  
A class that counts nodes during traversal.
- class [LinkPred::Collector< Network >](#)  
A class that collects nodes during traversal.
- class [LinkPred::GraphTraversal< Network, NodeProcessor >](#)  
Graph traversal interface.
- class [LinkPred::BFS< Network, NodeProcessor >](#)  
*BFS* graph traversal.
- class [LinkPred::DFS< Network, NodeProcessor >](#)  
*DFS* graph traversal.

## Namespaces

- [LinkPred](#)  
Main namespace.

### 10.27.1 Detailed Description

Contains the implementation of graph traversal algorithms.

## 10.28 include/linkpred/graphalg/traversal/traversal.hpp File Reference

Includes the headers related to graph traversal algorithms.

```
#include "linkpred/graphalg/traversal/graphtraversal.hpp"
```

Include dependency graph for traversal.hpp:

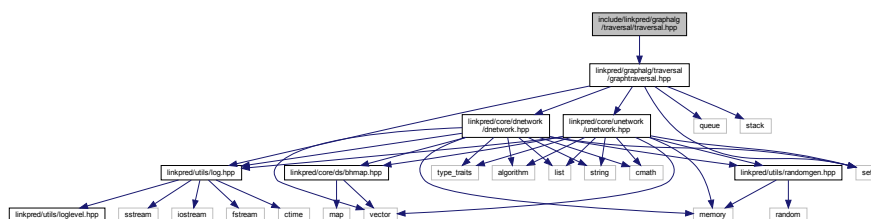

This graph shows which files directly or indirectly include this file:

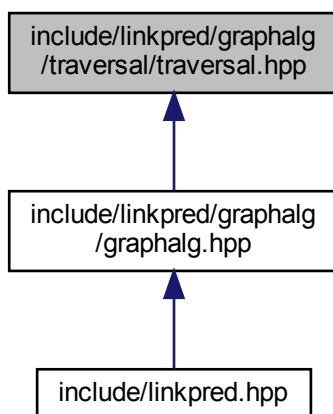

### 10.28.1 Detailed Description

Includes the headers related to graph traversal algorithms.

## 10.29 include/linkpred/instantiations.hpp File Reference

Contains explicit instantiations of template classes.

### 10.29.1 Detailed Description

Contains explicit instantiations of template classes.

## 10.30 include/linkpred/ml/classifiers/classifier.hpp File Reference

Contains the interface of a classifier.

```
#include "LinkPredConfig.hpp"  
#include "linkpred/numerical/linear/vec.hpp"  
#include <vector>
```

Include dependency graph for classifier.hpp:

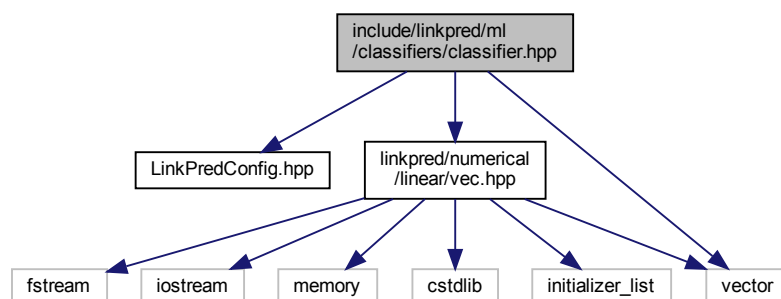

This graph shows which files directly or indirectly include this file:

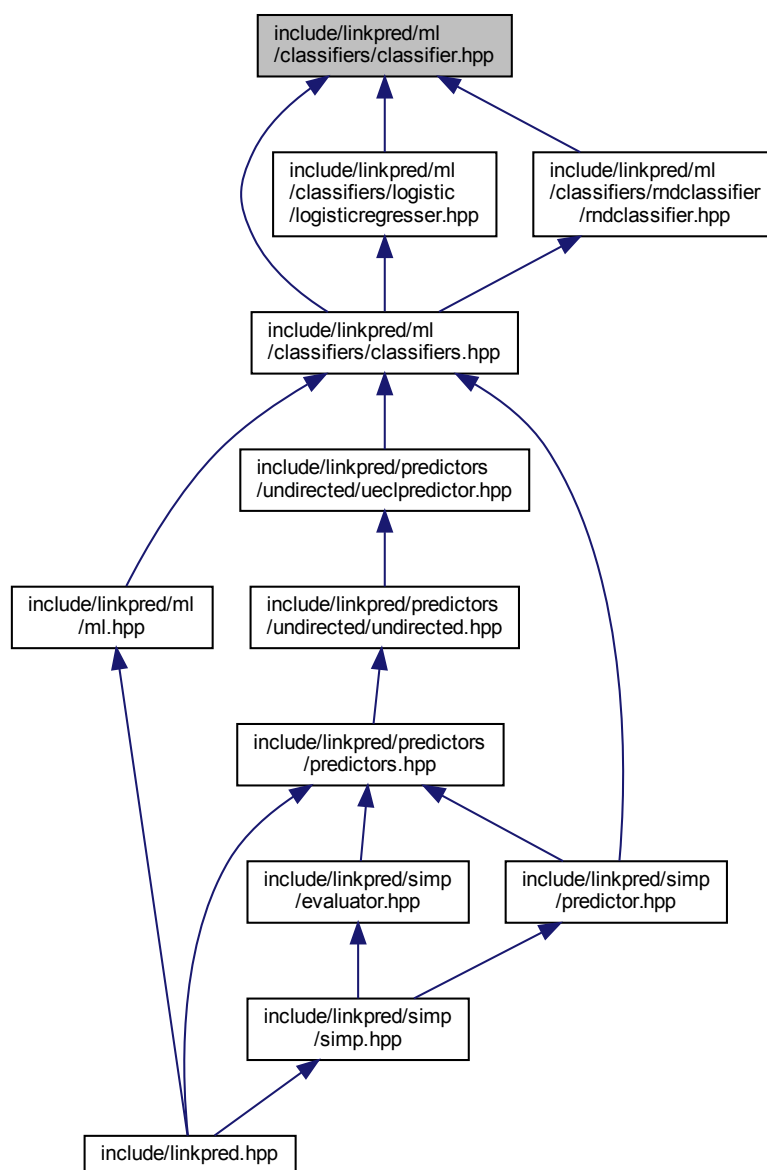

## Classes

- class [LinkPred::Classifier< InRndIt, OutRndIt, ScoreRndIt >](#)  
*Interface of a binary classifier.*

## Namespaces

- [LinkPred](#)  
*Main namespace.*



### 10.30.1 Detailed Description

Contains the interface of a classifier.

## 10.31 include/linkpred/ml/classifiers/classifiers.hpp File Reference

Includes the headers related to classifiers.

```
#include "linkpred/ml/classifiers/classifier.hpp"
#include "linkpred/ml/classifiers/ffn/ffn.hpp"
#include "linkpred/ml/classifiers/logistic/logisticregresser.hpp"
#include "linkpred/ml/classifiers/linearsvm/linearsvm.hpp"
#include "linkpred/ml/classifiers/naivebayes/naivebayes.hpp"
#include "linkpred/ml/classifiers/rndclassifier/rndclassifier.hpp"
```

Include dependency graph for classifiers.hpp:

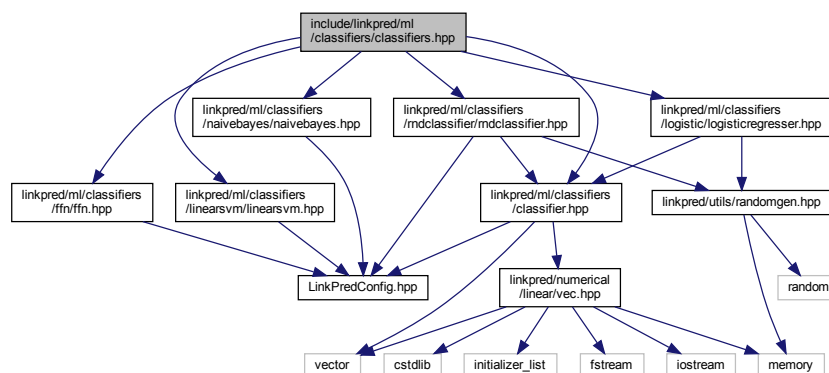

This graph shows which files directly or indirectly include this file:

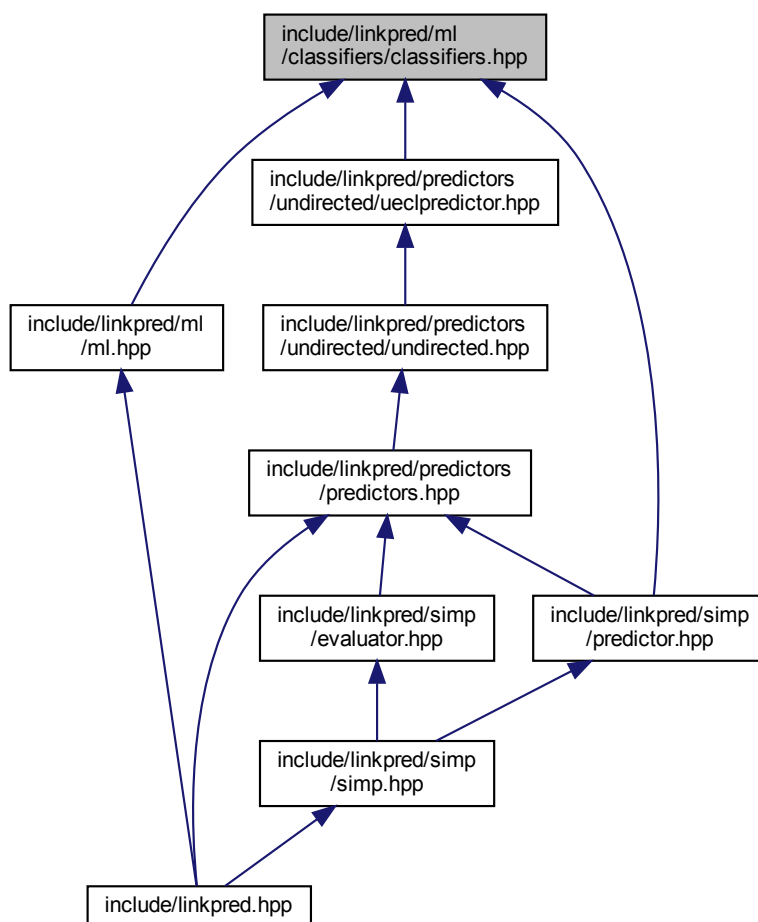

### 10.31.1 Detailed Description

Includes the headers related to classifiers.

## 10.32 include/linkpred/ml/classifiers/ffn/ffn.hpp File Reference

Contains a wrapper of `mlpack::ann::FFN` (feed-forward neural network).

```
#include "LinkPredConfig.hpp"
```

Include dependency graph for ffn.hpp:

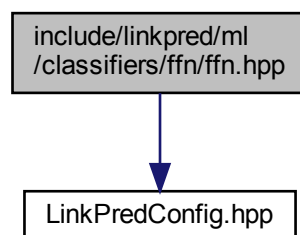

This graph shows which files directly or indirectly include this file:

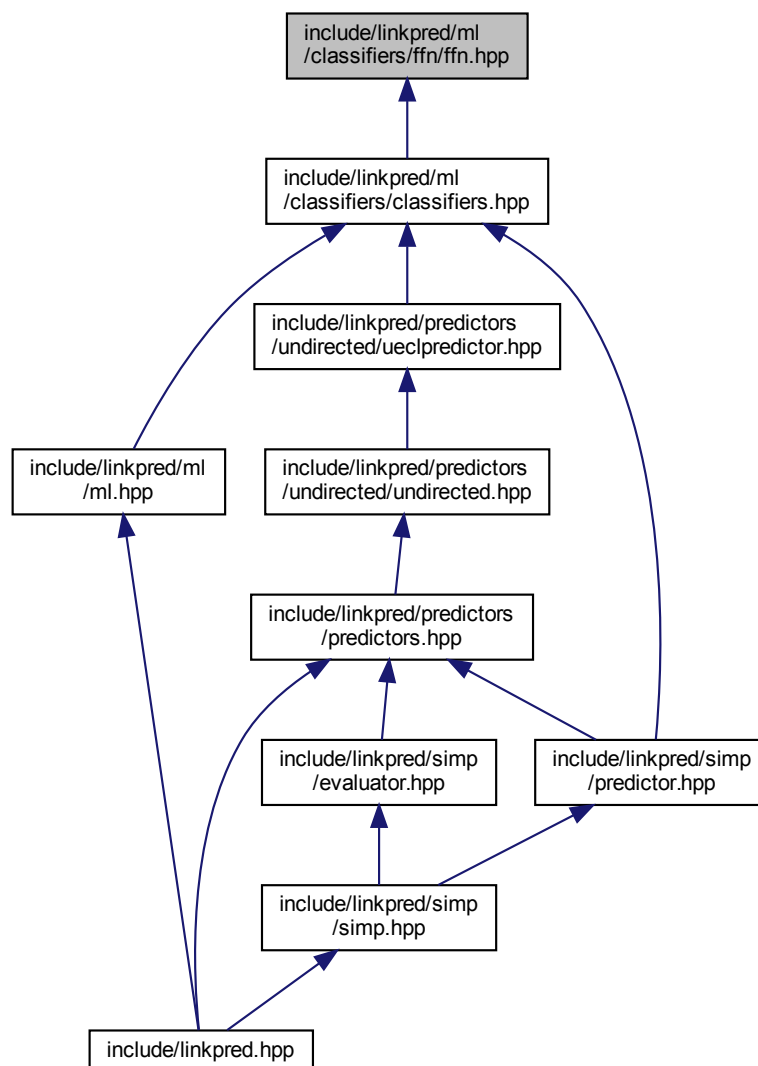

### 10.32.1 Detailed Description

Contains a wrapper of `mlpack::ann::FFN` (feed-forward neural network).

## 10.33 `include/linkpred/ml/classifiers/linearsvm/linearsvm.hpp` File Reference

Contains a wrapper of `mlpack::smv::LinearSVM`.

```
#include "LinkPredConfig.hpp"
```

Include dependency graph for linearsvm.hpp:

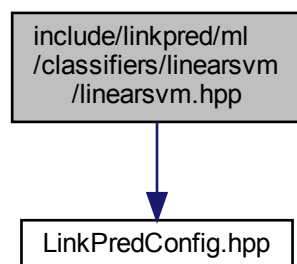

This graph shows which files directly or indirectly include this file:

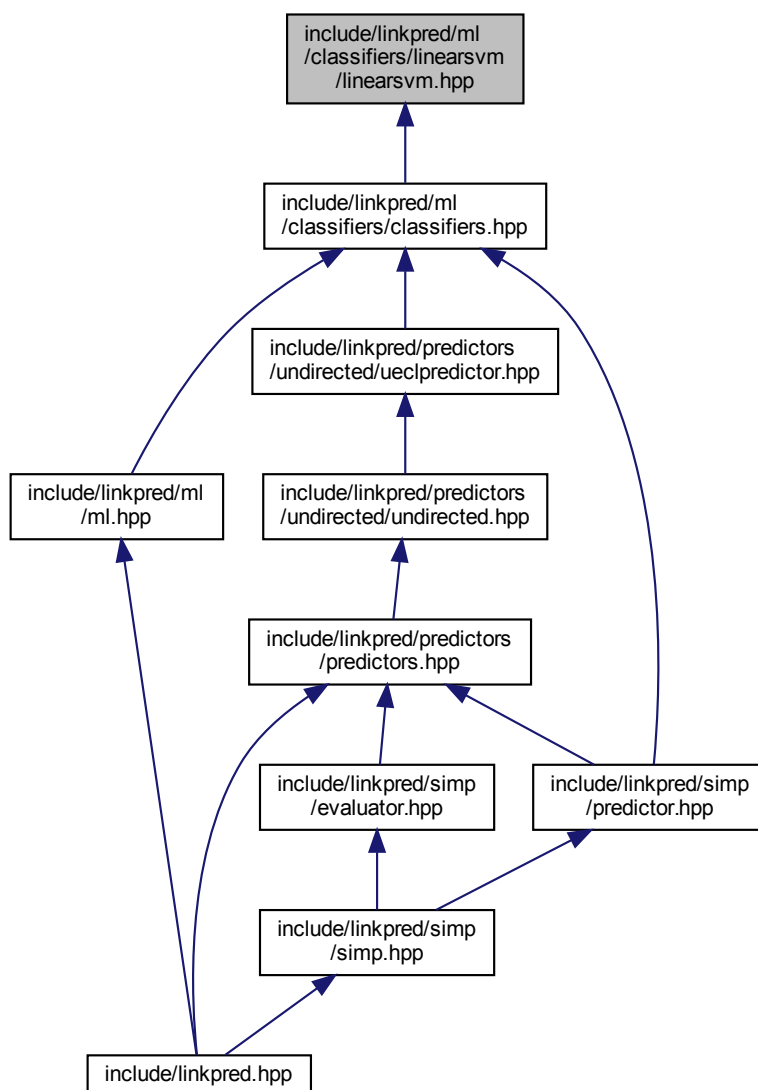

### 10.33.1 Detailed Description

Contains a wrapper of `mlpack::smv::LinearSVM`.

## 10.34 `include/linkpred/ml/classifiers/logistic/logisticregresser.hpp` File Reference

Contains the implementation of a logistic regression algorithm.

```
#include "linkpred/ml/classifiers/classifier.hpp"
```

```
#include "linkpred/utils/randomgen.hpp"
```

Include dependency graph for logisticregresser.hpp:

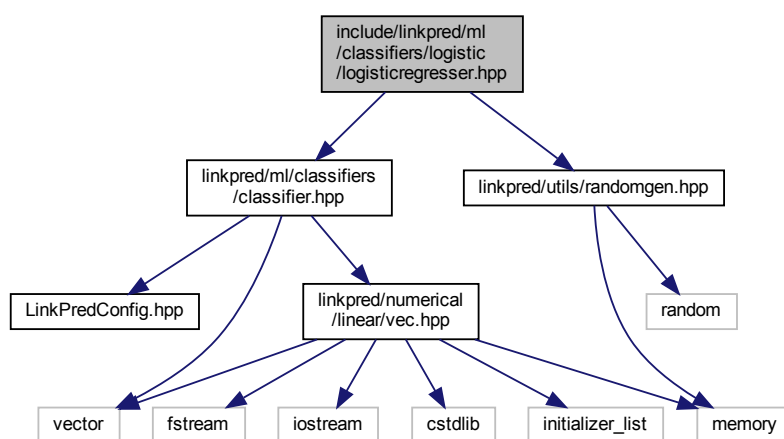

This graph shows which files directly or indirectly include this file:

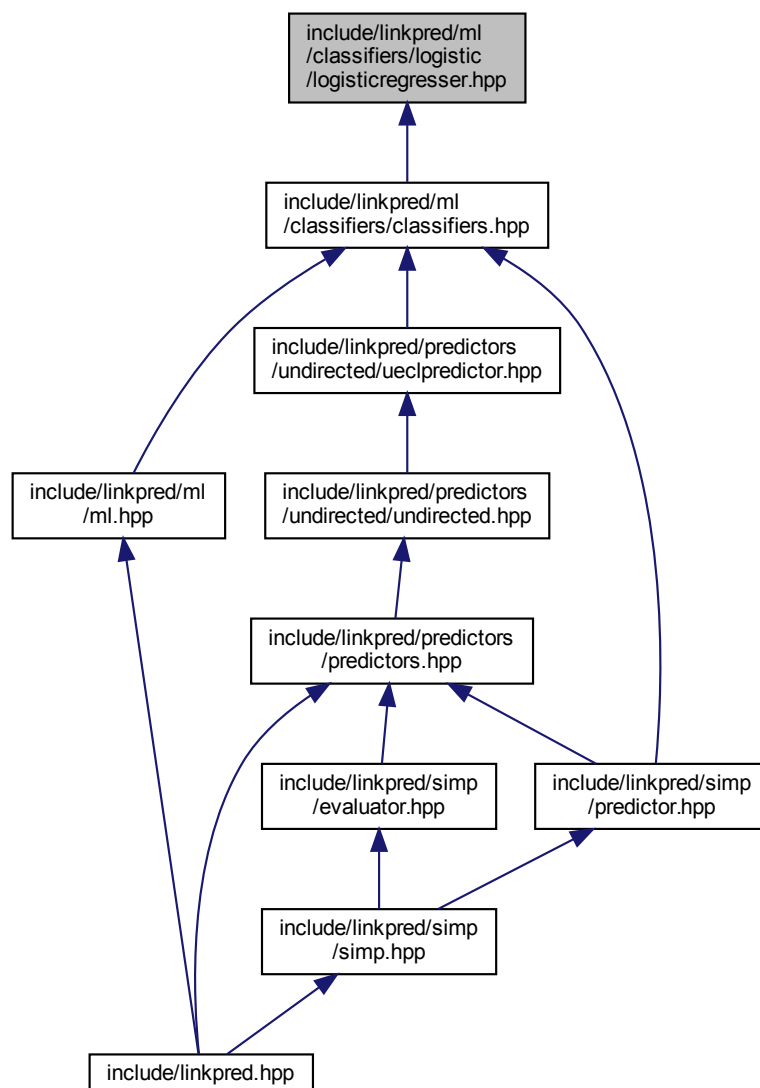

## Classes

- class [LinkPred::LogisticRegressor< InRndIt, OutRndIt, ScoreRndIt >](#)  
*Logistic regression algorithm.*

## Namespaces

- [LinkPred](#)  
*Main namespace.*



### 10.34.1 Detailed Description

Contains the implementation of a logistic regression algorithm.

## 10.35 include/linkpred/ml/classifiers/logistic/logregcg.hpp File Reference

Contains the implementation of a logistic regression optimization problem.

```
#include "linkpred/numerical/cg/cgdescent.hpp"
#include "linkpred/utils/randomgen.hpp"
#include "linkpred/numerical/linear/vec.hpp"
#include <vector>
```

Include dependency graph for logregcg.hpp:

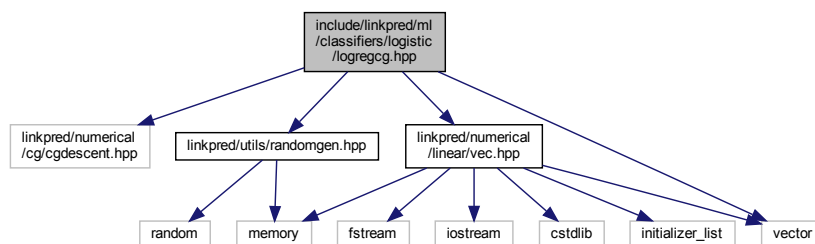

### Classes

- class [LinkPred::LogRegCG< InRndIt, OutRndIt >](#)

*Logistic regression optimization problem.*

### Namespaces

- [LinkPred](#)

*Main namespace.*

### 10.35.1 Detailed Description

Contains the implementation of a logistic regression optimization problem.

## 10.36 include/linkpred/ml/classifiers/naivebayes/naivebayes.hpp File Reference

Contains a wrapper of `mlpack::maive_bayes::NaiveBayesClassifier`.

```
#include "LinkPredConfig.hpp"
```

Include dependency graph for `naivebayes.hpp`:

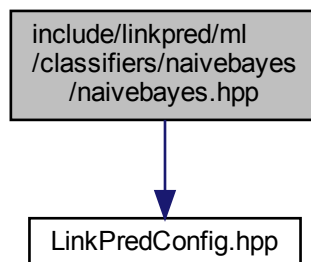

This graph shows which files directly or indirectly include this file:

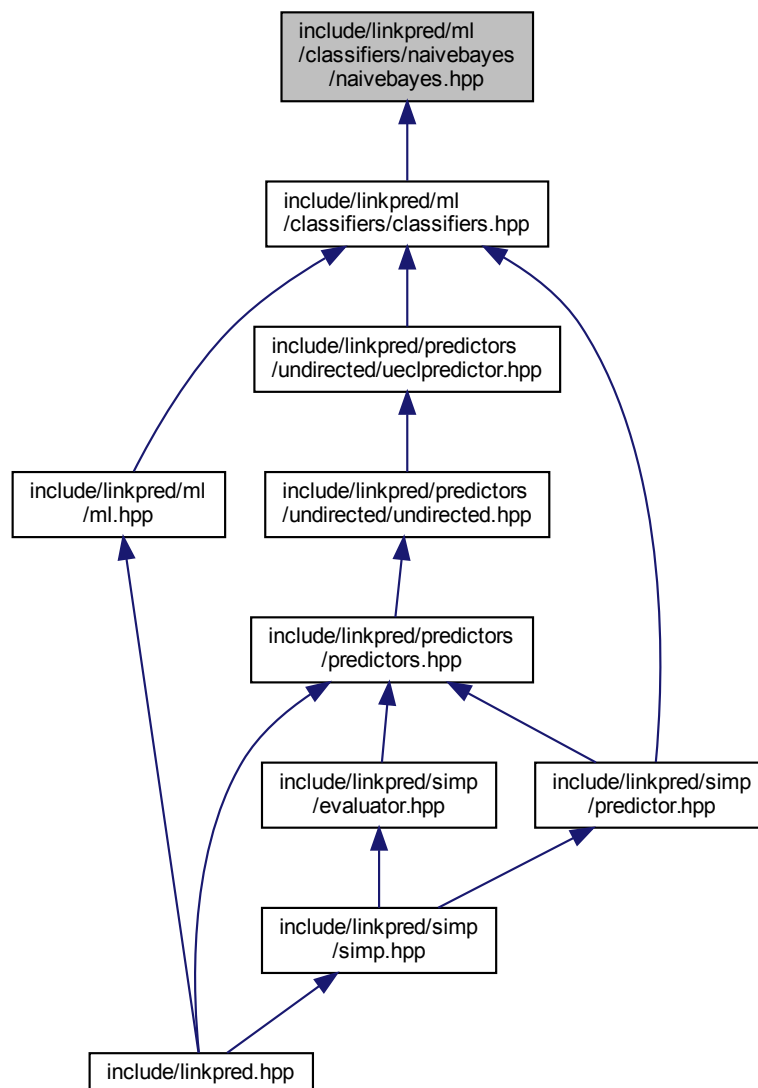

### 10.36.1 Detailed Description

Contains a wrapper of `mlpack::maive_bayes::NaiveBayesClassifier`.

## 10.37 include/linkpred/ml/classifiers/rndclassifier/rndclassifier.hpp File Reference

Contains a random classifier (for debugging purposes).

```
#include "LinkPredConfig.hpp"
#include "linkpred/ml/classifiers/classifier.hpp"
```



This graph shows which files directly or indirectly include this file:

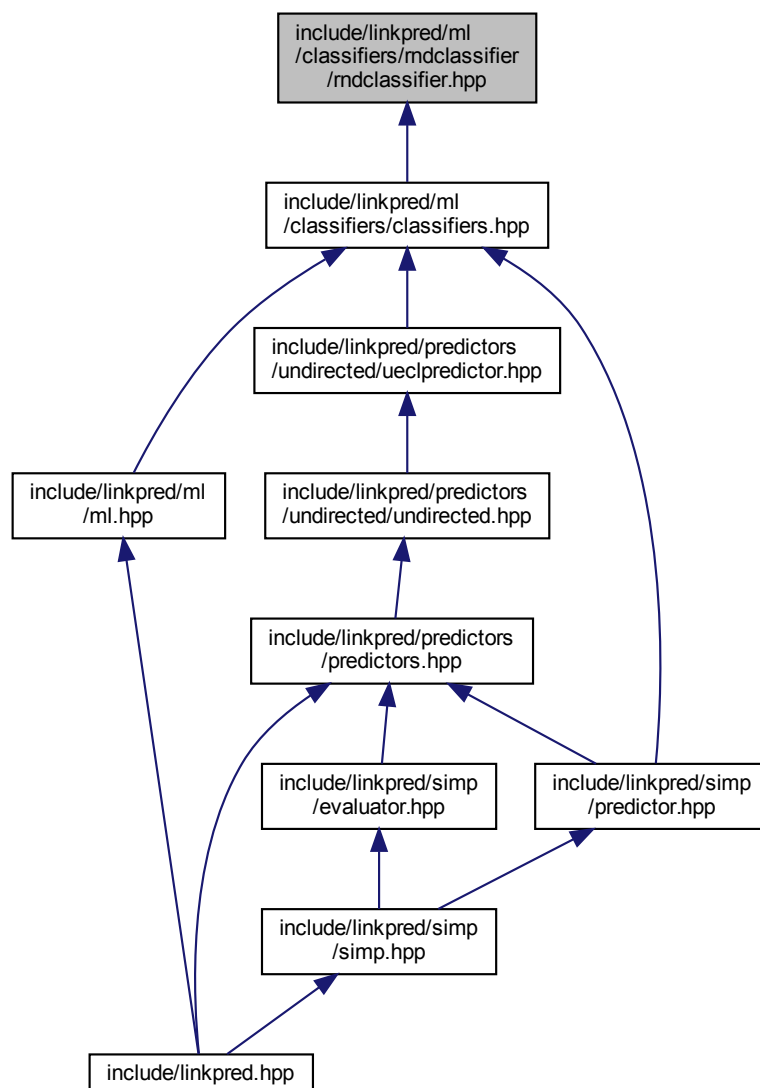

## Classes

- class [LinkPred::RndClassifier< InRndIt, OutRndIt, ScoreRndIt >](#)  
*Random classifier.*

## Namespaces

- [LinkPred](#)  
*Main namespace.*



## 10.39 include/linkpred/ml/simmeasures/cosinesim.hpp File Reference

Contains the implementation of cosine similarity.

```
#include "linkpred/ml/simmeasures/simmeasure.hpp"
```

Include dependency graph for cosinesim.hpp:

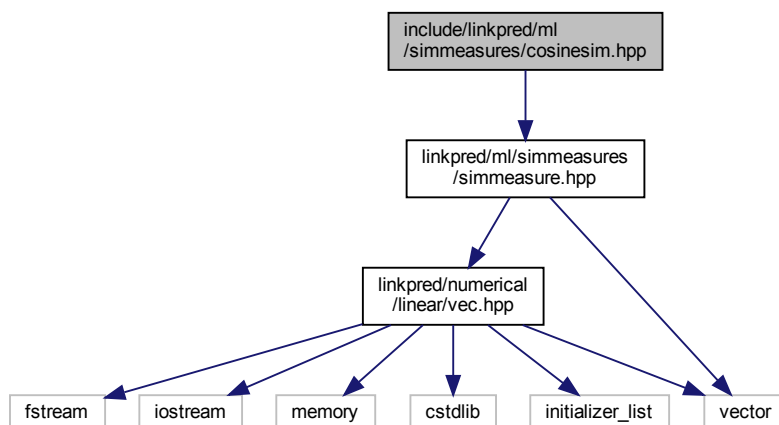

This graph shows which files directly or indirectly include this file:

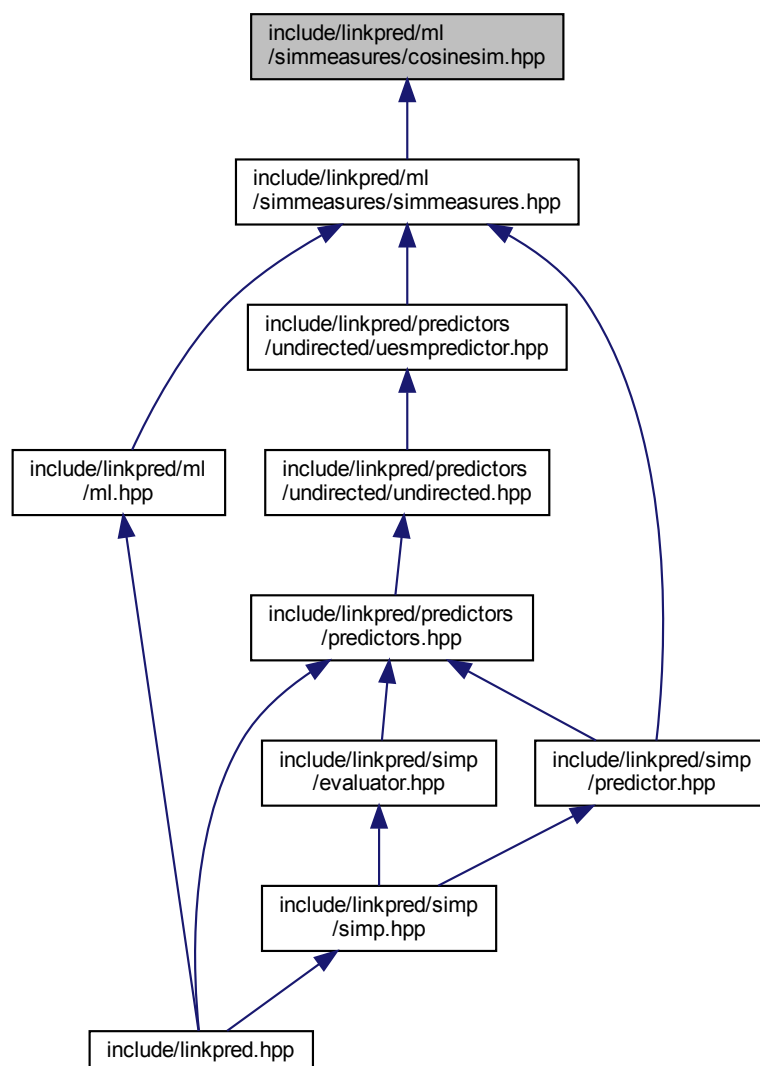

## Classes

- class [LinkPred::CosineSim](#)  
*Cosine similarity.*

## Namespaces

- [LinkPred](#)  
*Main namespace.*

### 10.39.1 Detailed Description

Contains the implementation of cosine similarity.



## 10.40 include/linkpred/ml/simmeasures/dotprod.hpp File Reference

Contains the implementation of the dot product similarity measure.

```
#include "linkpred/ml/simmeasures/simmeasure.hpp"
```

Include dependency graph for dotprod.hpp:

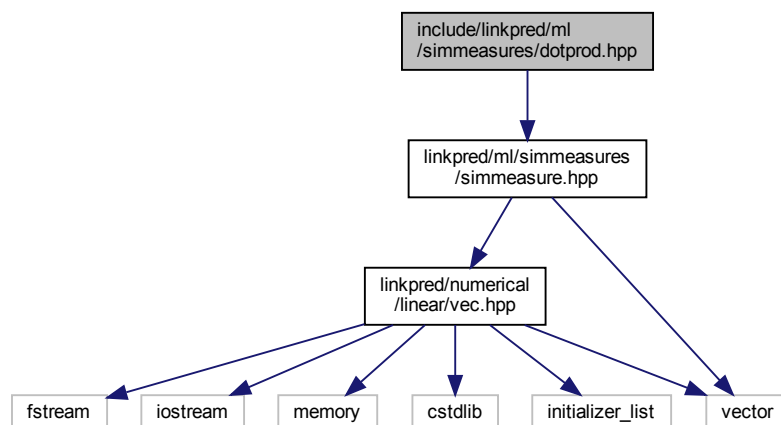

This graph shows which files directly or indirectly include this file:

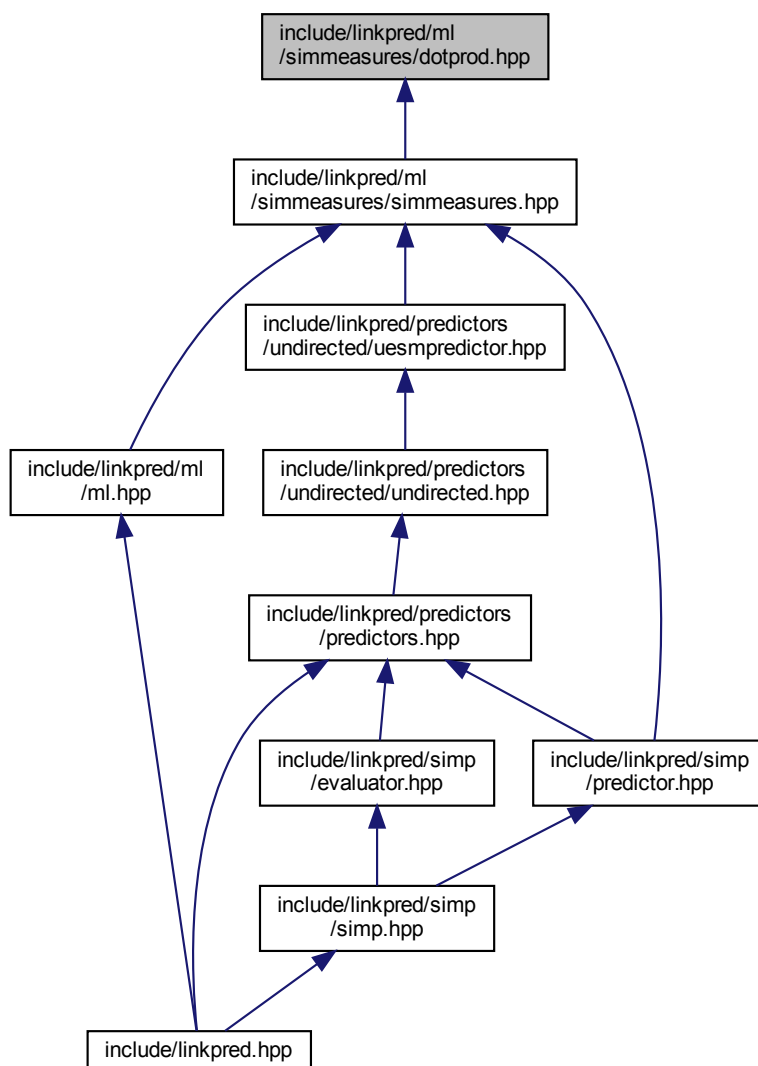

## Classes

- class [LinkPred::DotProd](#)  
A simple dot product similarity measure.

## Namespaces

- [LinkPred](#)  
Main namespace.

### 10.40.1 Detailed Description

Contains the implementation of the dot product similarity measure.

## 10.41 include/linkpred/ml/simmeasures/l1sim.hpp File Reference

Contains the implementation of L1 similarity.

```
#include "linkpred/ml/simmeasures/simmeasure.hpp"
```

Include dependency graph for l1sim.hpp:

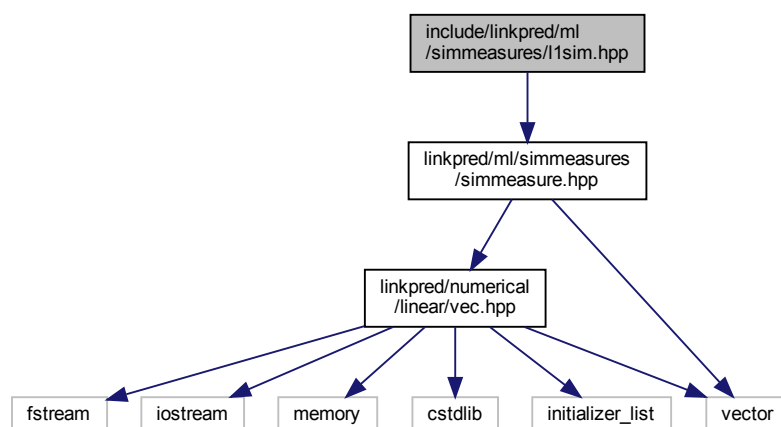

This graph shows which files directly or indirectly include this file:

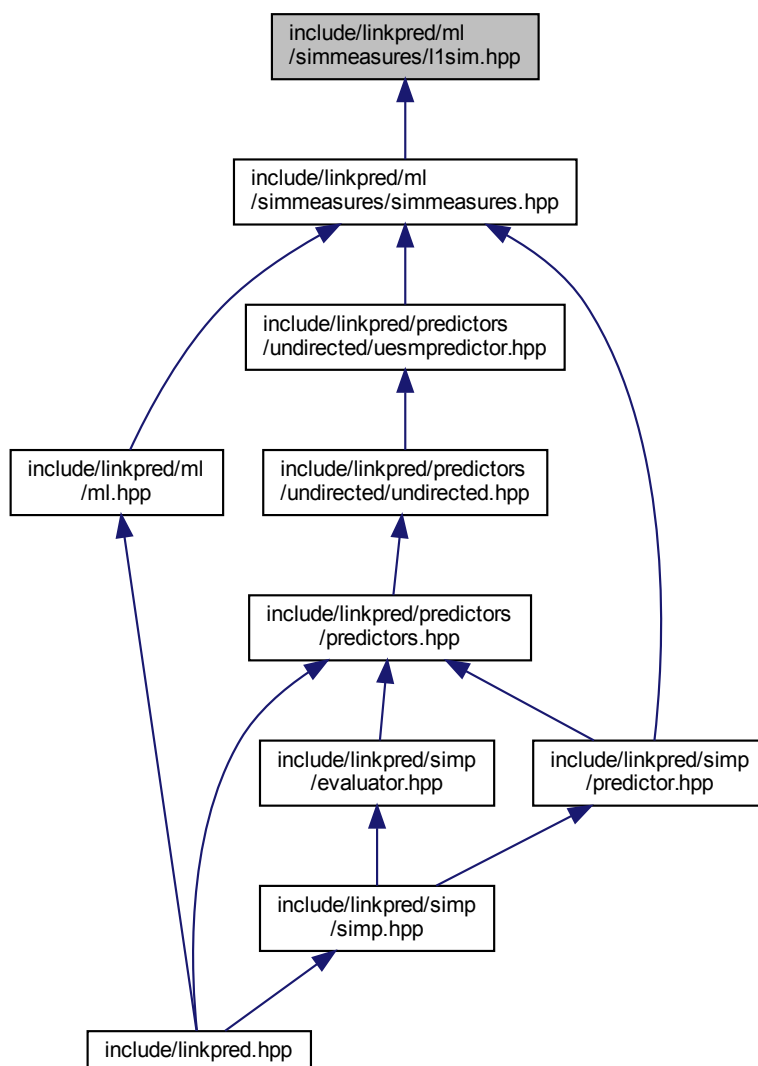

## Classes

- class [LinkPred::L1Sim](#)  
*L1 similarity (negative the L1 norm or Manhattan distance).*

## Namespaces

- [LinkPred](#)  
*Main namespace.*

### 10.41.1 Detailed Description

Contains the implementation of L1 similarity.

## 10.42 include/linkpred/ml/simmeasures/l2sim.hpp File Reference

Contains the implementation of L2 similarity.

```
#include "linkpred/ml/simmeasures/simmeasure.hpp"
```

Include dependency graph for l2sim.hpp:

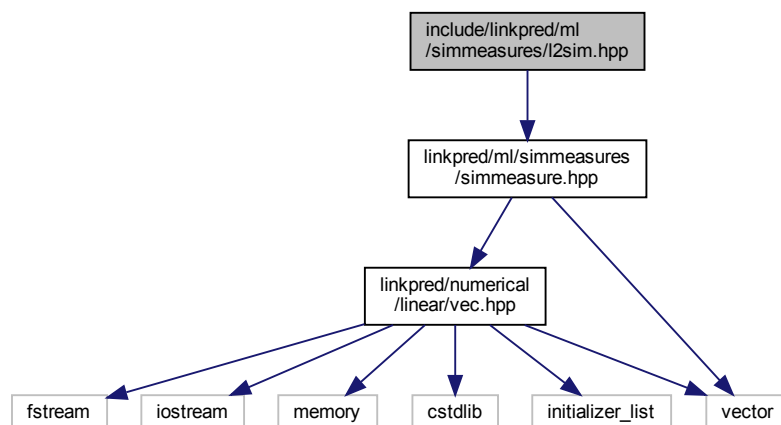

This graph shows which files directly or indirectly include this file:

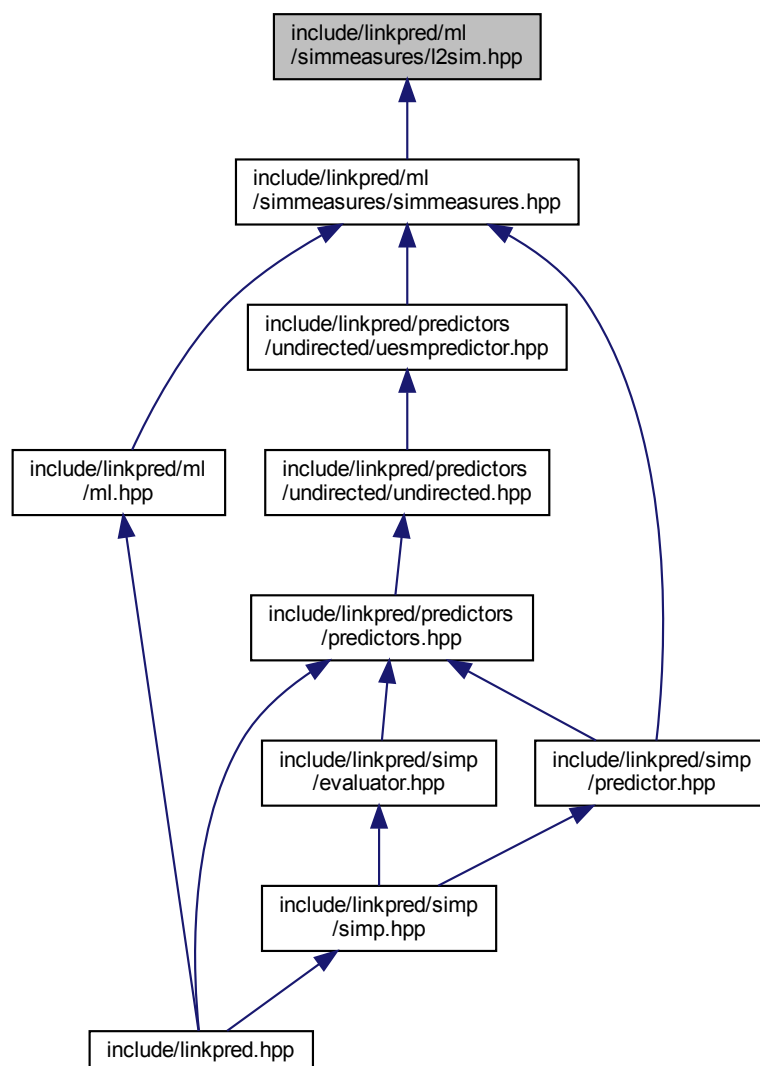

## Classes

- class [LinkPred::L2Sim](#)  
*L2 similarity (negative the Euclidean distance).*

## Namespaces

- [LinkPred](#)  
*Main namespace.*

### 10.42.1 Detailed Description

Contains the implementation of L2 similarity.

## 10.43 include/linkpred/ml/simmeasures/lpsim.hpp File Reference

Contains the implementation of LP similarity.

```
#include "linkpred/ml/simmeasures/simmeasure.hpp"
```

Include dependency graph for lpsim.hpp:

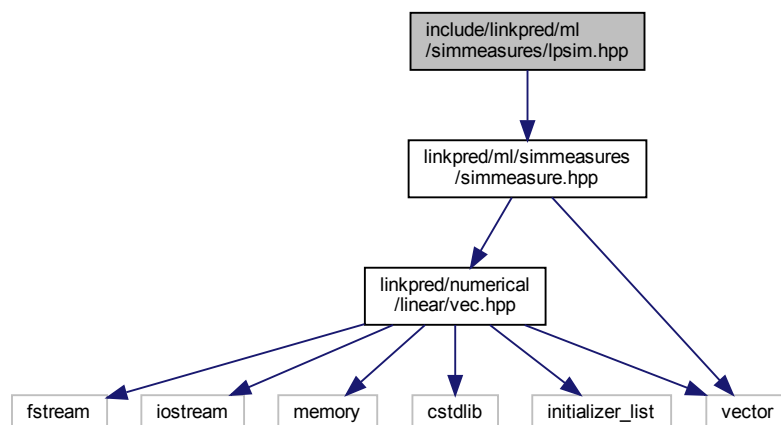

This graph shows which files directly or indirectly include this file:

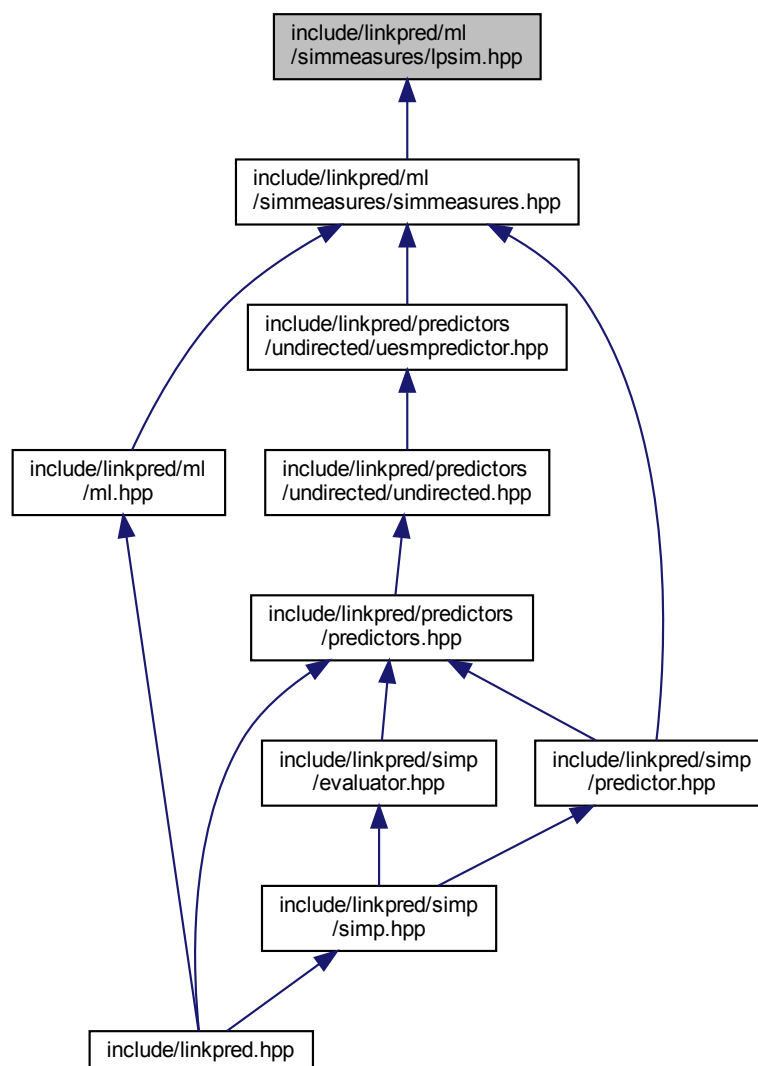

## Classes

- class [LinkPred::LPSim](#)  
*LP similarity (negative the Lp norm).*

## Namespaces

- [LinkPred](#)  
*Main namespace.*

### 10.43.1 Detailed Description

Contains the implementation of LP similarity.



## 10.44 include/linkpred/ml/simmeasures/pearson.hpp File Reference

Contains the implementation of Pearson similarity.

```
#include "linkpred/ml/simmeasures/simmeasure.hpp"
```

Include dependency graph for `pearson.hpp`:

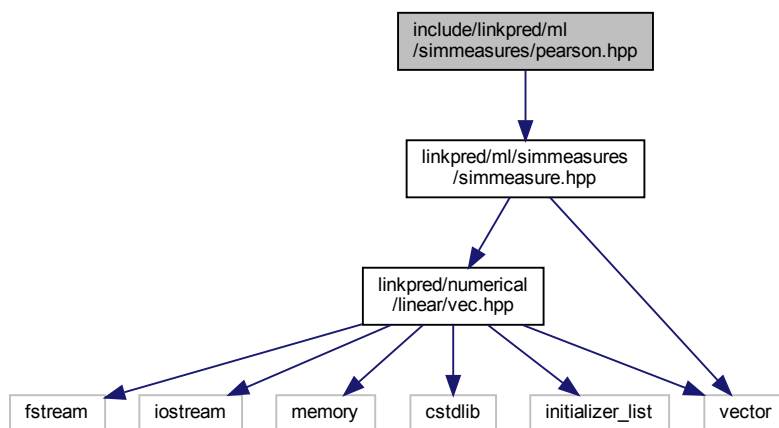

This graph shows which files directly or indirectly include this file:

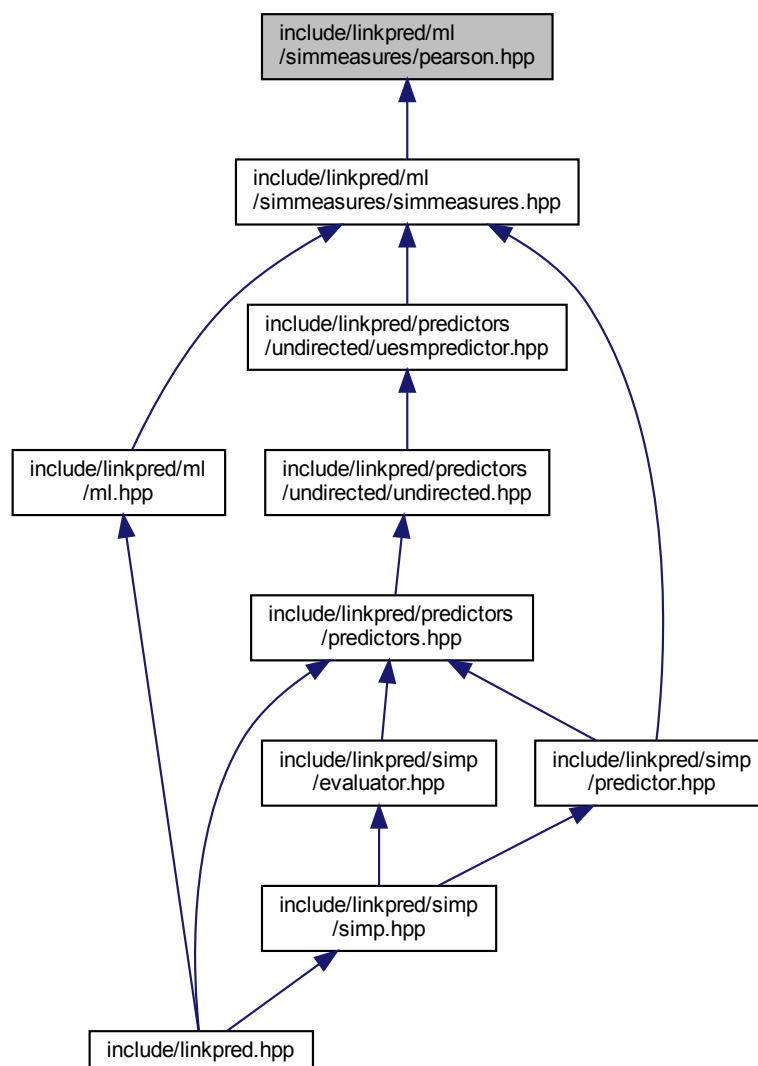

## Classes

- class [LinkPred::Pearson](#)  
*Pearson* similarity (*Pearson* correlation coefficient).

## Namespaces

- [LinkPred](#)  
*Main namespace.*

### 10.44.1 Detailed Description

Contains the implementation of Pearson similarity.

## 10.45 include/linkpred/ml/simmeasures/simmeasure.hpp File Reference

Contains the interface of a similarity measure.

```
#include "linkpred/numerical/linear/vec.hpp"
```

```
#include <vector>
```

Include dependency graph for simmeasure.hpp:

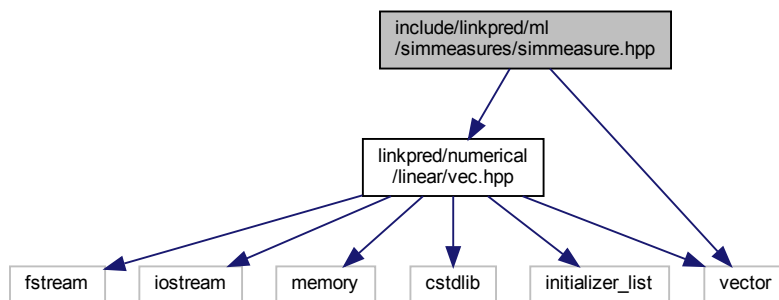

This graph shows which files directly or indirectly include this file:

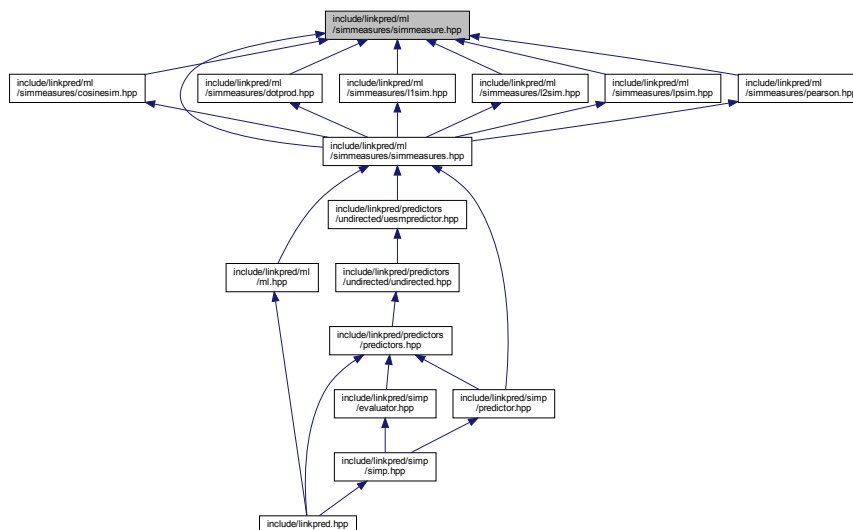

### Classes

- class [LinkPred::SimMeasure](#)  
*Interface of a similarity measure.*

### Namespaces

- [LinkPred](#)  
*Main namespace.*

### 10.45.1 Detailed Description

Contains the interface of a similarity measure.

## 10.46 include/linkpred/ml/simmeasures/simmeasures.hpp File Reference

Includes the headers related to similarity measures.

```
#include "linkpred/ml/simmeasures/simmeasure.hpp"
#include "linkpred/ml/simmeasures/cosinesim.hpp"
#include "linkpred/ml/simmeasures/dotprod.hpp"
#include "linkpred/ml/simmeasures/l1sim.hpp"
#include "linkpred/ml/simmeasures/l2sim.hpp"
#include "linkpred/ml/simmeasures/lpsim.hpp"
#include "linkpred/ml/simmeasures/pearson.hpp"
```

Include dependency graph for simmeasures.hpp:

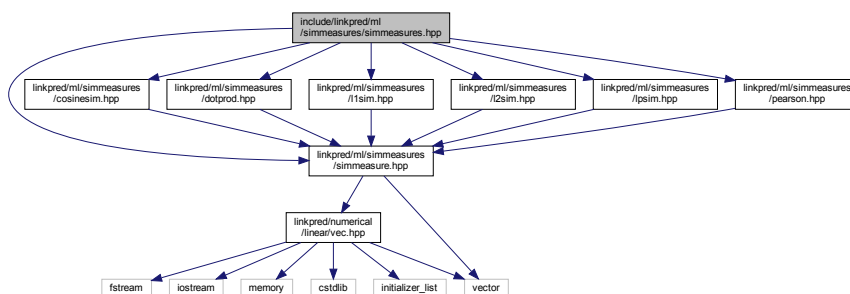

This graph shows which files directly or indirectly include this file:

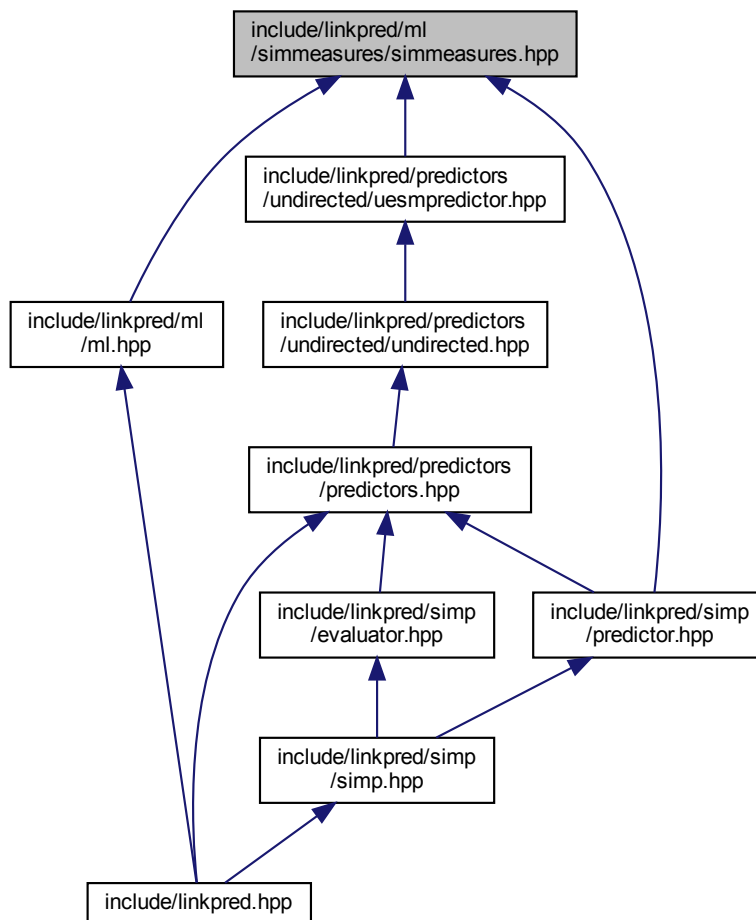

### 10.46.1 Detailed Description

Includes the headers related to similarity measures.

## 10.47 include/linkpred/numerical/linear/gfmatrix.hpp File Reference

Contains the implementation of a full matrix.

```
#include <cstdlib>
#include <vector>
```

```
#include "linkpred/numerical/linear/vec.hpp"
```

Include dependency graph for gfmatrix.hpp:

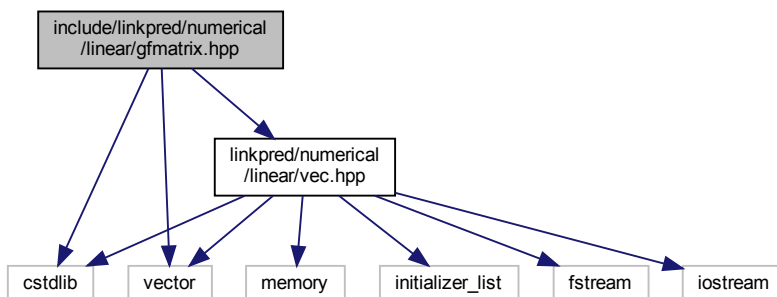

This graph shows which files directly or indirectly include this file:

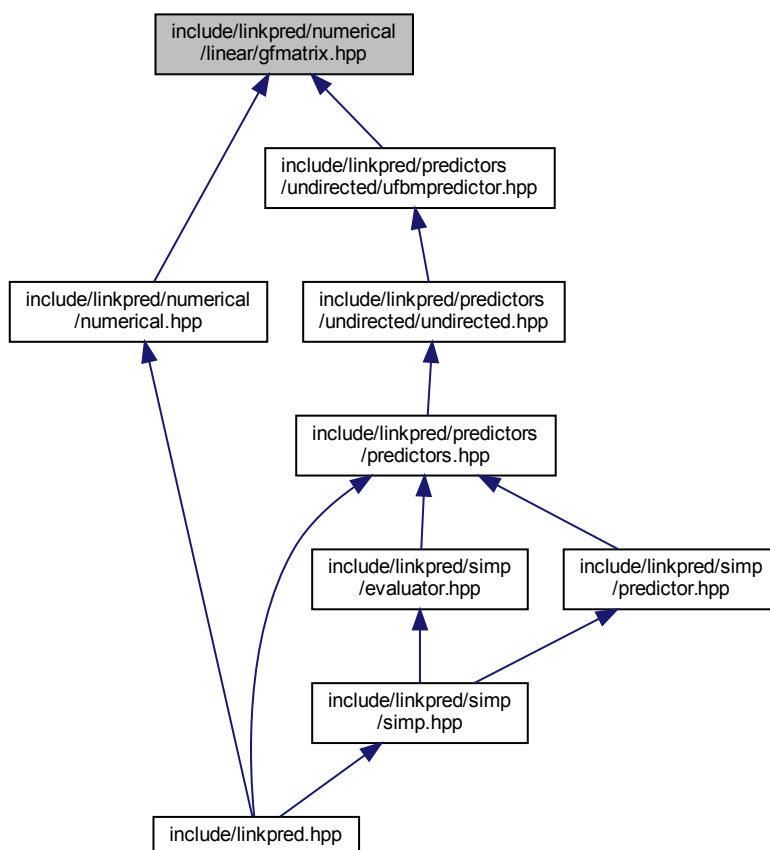

## Classes

- class [LinkPred::GFMatrix](#)

*Generalized full matrix. The storage scheme used is column-major.*

## Namespaces

- [LinkPred](#)

*Main namespace.*

### 10.47.1 Detailed Description

Contains the implementation of a full matrix.

## 10.48 include/linkpred/numerical/linear/vec.hpp File Reference

Contains the implementation of a vector (in the sense of linear algebra).

```
#include <fstream>
#include <iostream>
#include <memory>
#include <vector>
#include <cstdlib>
#include <initializer_list>
```

Include dependency graph for vec.hpp:

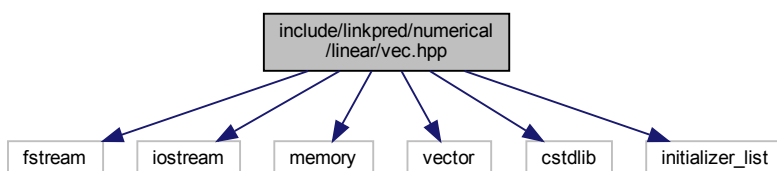

This graph shows which files directly or indirectly include this file:

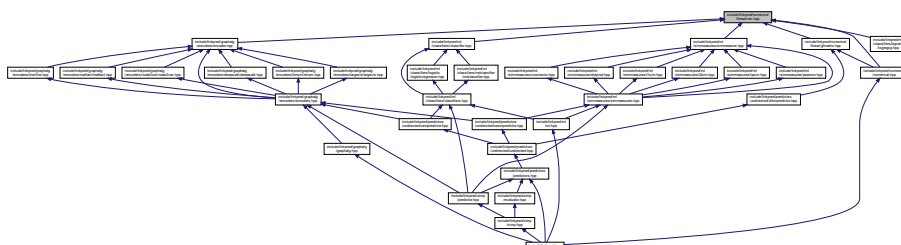

## Classes

- class [LinkPred::Vec](#)

*This class represent a vector (in the sense of linear algebra).*

## Namespaces

- [LinkPred](#)

*Main namespace.*

## Functions

- Vec [LinkPred::operator+](#) (Vec const &v1, Vec const &v2)
- Vec [LinkPred::operator-](#) (Vec const &v1, Vec const &v2)
- Vec [LinkPred::operator\\*](#) (Vec const &v1, Vec const &v2)
- Vec [LinkPred::operator/](#) (Vec const &v1, Vec const &v2)
- Vec [LinkPred::operator+](#) (double a, Vec const &v)
- Vec [LinkPred::operator-](#) (double a, Vec const &v)
- Vec [LinkPred::operator\\*](#) (double a, Vec const &v)
- Vec [LinkPred::operator/](#) (double a, Vec const &v)
- Vec [LinkPred::operator+](#) (Vec const &v, double a)
- Vec [LinkPred::operator-](#) (Vec const &v, double a)
- Vec [LinkPred::operator\\*](#) (Vec const &v, double a)
- Vec [LinkPred::operator/](#) (Vec const &v, double a)
- double [LinkPred::operator^](#) (Vec const &v1, Vec const &v2)

### 10.48.1 Detailed Description

Contains the implementation of a vector (in the sense of linear algebra).

## 10.49 include/linkpred/numerical/mds/logmdscg.hpp File Reference

Contains the implementation of the optimization problem associated with multidimensional scaling using the logarithmic (MULTISCALE) loss function.

```
#include "linkpred/numerical/cg/cgdescent.hpp"
```

```
#include "linkpred/utils/randomgen.hpp"
```

Include dependency graph for logmdscg.hpp:

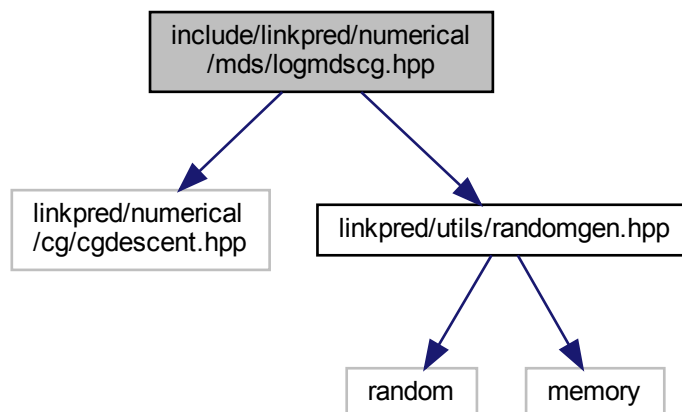



This graph shows which files directly or indirectly include this file:

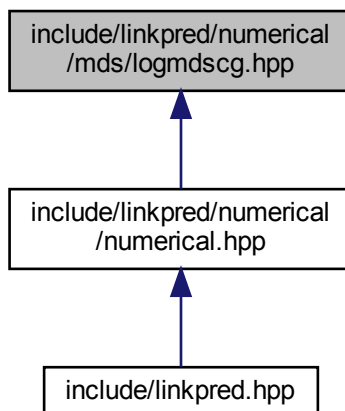

## Classes

- class [LinkPred::LogMDSCG](#)

*Optimization problem associated with multidimensional scaling using the logarithmic (MULTISCALE) loss function.*

## Namespaces

- [LinkPred](#)

*Main namespace.*

### 10.49.1 Detailed Description

Contains the implementation of the optimization problem associated with multidimensional scaling using the logarithmic (MULTISCALE) loss function.

## 10.50 include/linkpred/numerical/mds/mds.hpp File Reference

Contains the implementation of a solver of the multidimensional scaling problem using the logarithmic (MULTISCALE) loss function.

```
#include <cstdlib>
```

Include dependency graph for mds.hpp:

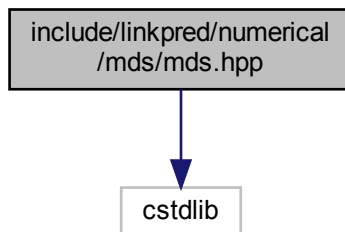

This graph shows which files directly or indirectly include this file:

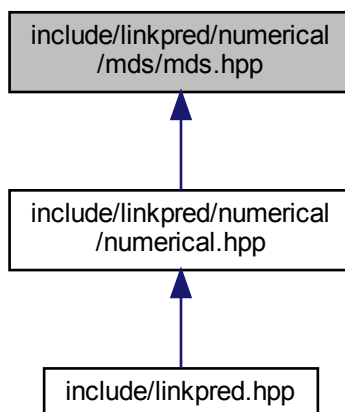

## Classes

- class [LinkPred::MDS](#)  
*Solve the [MDS](#) problem.*

## Namespaces

- [LinkPred](#)  
*Main namespace.*

## Enumerations

- enum [LinkPred::MDSAlg](#) { [LinkPred::lpoptMDS](#), [LinkPred::CGMDS](#) }

*MDS solution methods.*

### 10.50.1 Detailed Description

Contains the implementation of a solver of the multidimensional scaling problem using the logarithmic (MULTISC↔ALE) loss function.

## 10.51 include/linkpred/numerical/mf/fastsig.hpp File Reference

Contains the implementation of a fast sigmoid.

```
#include <type_traits>
#include <vector>
#include <cmath>
```

Include dependency graph for fastsig.hpp:

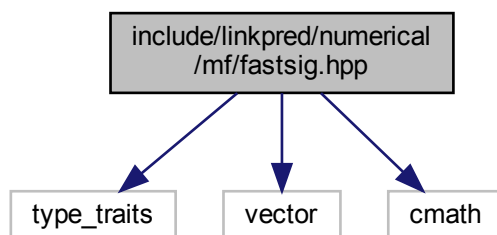

This graph shows which files directly or indirectly include this file:

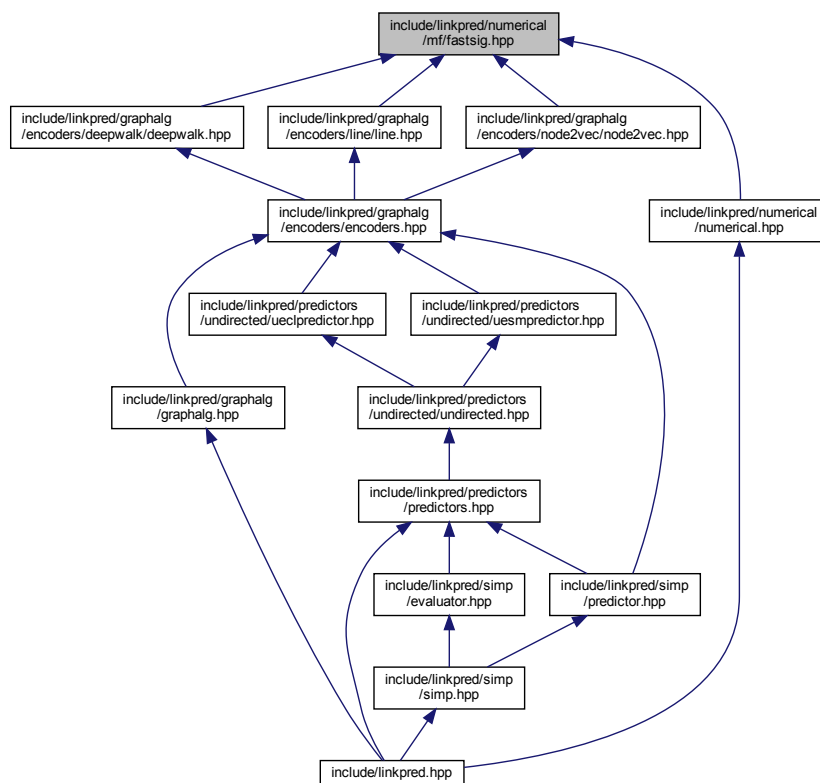

## Classes

- class [LinkPred::FastSig< T >](#)  
*A fast sigmoid.*

## Namespaces

- [LinkPred](#)  
*Main namespace.*

### 10.51.1 Detailed Description

Contains the implementation of a fast sigmoid.

## 10.52 include/linkpred/numerical/numerical.hpp File Reference

Includes the headers related to numerical algorithms.

```
#include "linkpred/numerical/mf/fastsig.hpp"
#include "linkpred/numerical/mds/logmdscg.hpp"
#include "linkpred/numerical/mds/mds.hpp"
#include "linkpred/numerical/linear/gfmatrix.hpp"
#include "linkpred/numerical/linear/vec.hpp"
#include "linkpred/numerical/cg/cgblas.hpp"
#include "linkpred/numerical/cg/cgdescent.hpp"
#include "linkpred/numerical/plfit/plfit.hpp"
```

Include dependency graph for numerical.hpp:

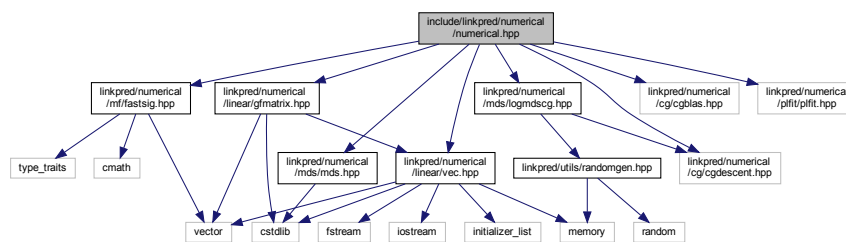

This graph shows which files directly or indirectly include this file:

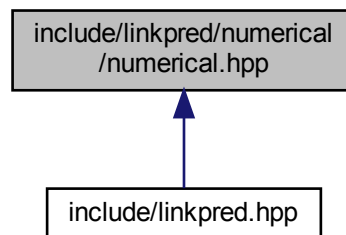

### 10.52.1 Detailed Description

Includes the headers related to numerical algorithms.

## 10.53 include/linkpred/perf/networkmanipulator.hpp File Reference

Contains the implementation of test data related classes.

```

#include "LinkPredConfig.hpp"
#include <linkpred/utils/miscutils.hpp>
#include "linkpred/core/unetwork/unetwork.hpp"
#include "linkpred/core/dnetwork/dnetwork.hpp"
#include "linkpred/graphalg/traversal/graphtraversal.hpp"
#include "linkpred/utils/log.hpp"
#include <memory>
#include <vector>
#include <set>
#include <iterator>

```

Include dependency graph for networkmanipulator.hpp:

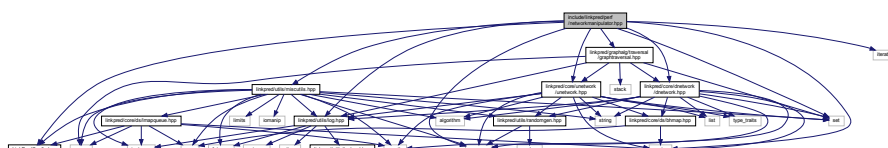

This graph shows which files directly or indirectly include this file:

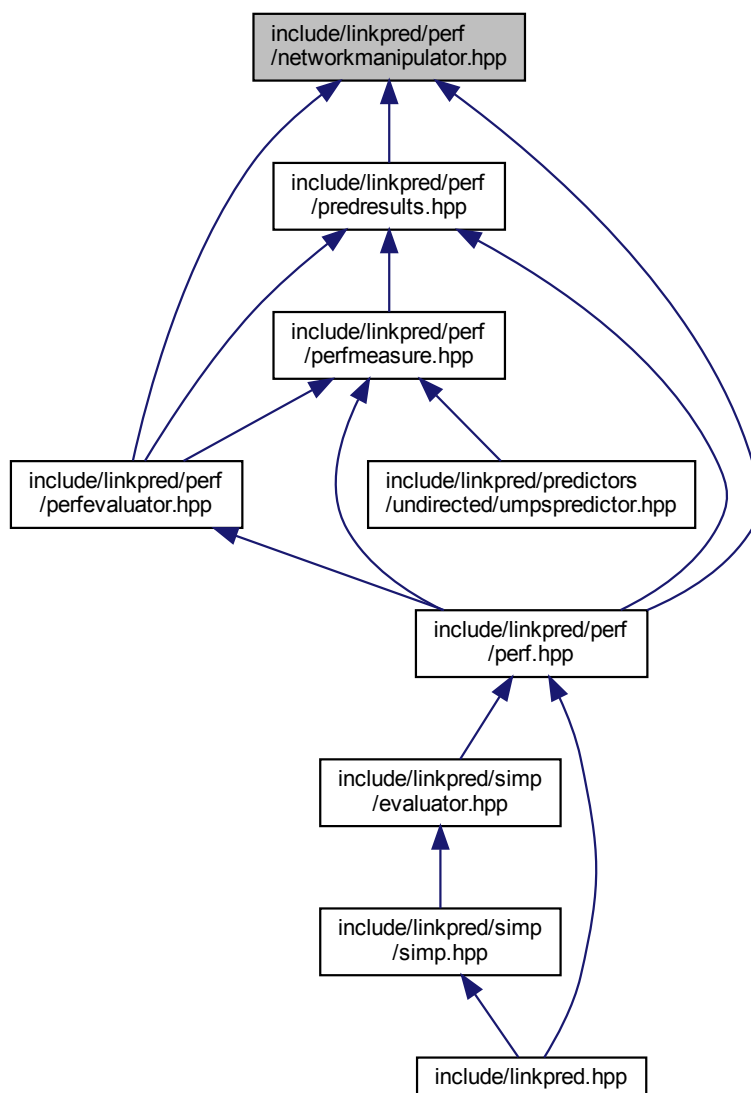

## Classes

- class [LinkPred::TestEdgeGen< Network, EdgeContT >](#)  
*Generate true positives and true negatives.*
- class [LinkPred::TestEdgeGen< Network, EdgeContT >::TPEdgelt](#)  
*TP edges iterator.*
- class [LinkPred::TestEdgeGen< Network, EdgeContT >::TNEdgelt](#)  
*TN edges iterator.*
- class [LinkPred::TestData< Network, EdgeContT >](#)  
*Test data.*
- class [LinkPred::TestData< Network, EdgeContT >::TestEdgelt](#)  
*Test edges iterator.*

- class [LinkPred::NetworkManipulator< Network >](#)

*Class to manipulate network by removing or adding edges.*

## Namespaces

- [LinkPred](#)

*Main namespace.*

## Enumerations

- enum [LinkPred::LinkClass](#) { [LinkPred::TP](#), [LinkPred::FN](#), [LinkPred::FP](#), [LinkPred::TN](#) }

*Enumeration of all classes of links.*

### 10.53.1 Detailed Description

Contains the implementation of test data related classes.

## 10.54 include/linkpred/perf/perf.hpp File Reference

Includes the headers related to performance evaluation classes.

```
#include "linkpred/perf/predresults.hpp"
#include "linkpred/perf/perfmeasure.hpp"
#include "linkpred/perf/networkmanipulator.hpp"
#include "linkpred/perf/perfevaluator.hpp"
```

Include dependency graph for perf.hpp:

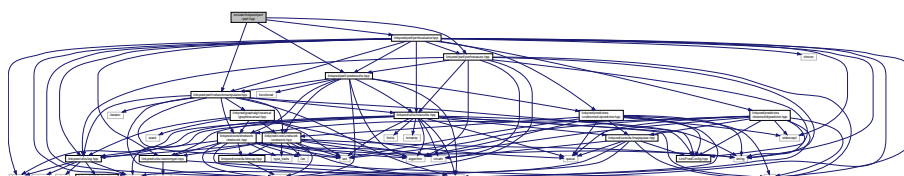



This graph shows which files directly or indirectly include this file:

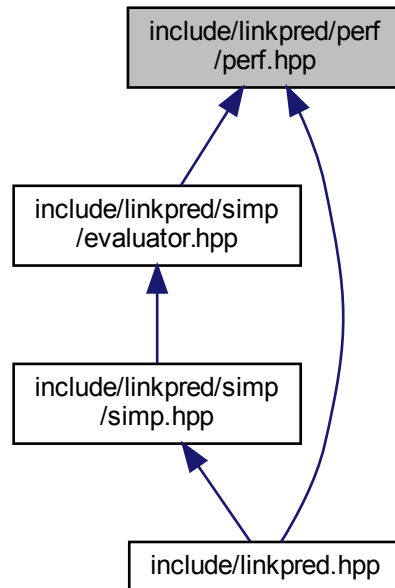

### 10.54.1 Detailed Description

Includes the headers related to performance evaluation classes.

## 10.55 include/linkpred/perf/perfevaluator.hpp File Reference

Includes the headers related to core classes.

```

#include <linkpred/predictors/undirected/ulpredictor.hpp>
#include <linkpred/utils/miscutils.hpp>
#include "linkpred/predictors/directed/dlpredictor.hpp"
#include "linkpred/perf/predresults.hpp"
#include "linkpred/perf/perfmeasure.hpp"
#include "linkpred/perf/networkmanipulator.hpp"
#include "linkpred/utils/randomgen.hpp"
#include "linkpred/utils/log.hpp"
#include <string>
#include <memory>
#include <vector>
#include <chrono>
#include <map>
#include <stdexcept>
#include <iostream>

```

```
#include <fstream>
```

Include dependency graph for `perfevaluator.hpp`:

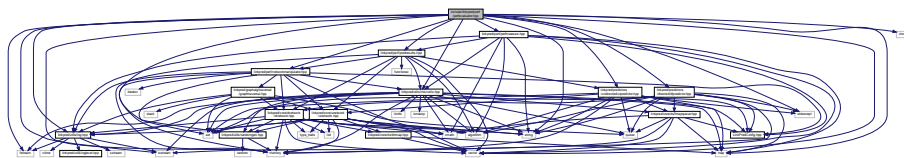

This graph shows which files directly or indirectly include this file:

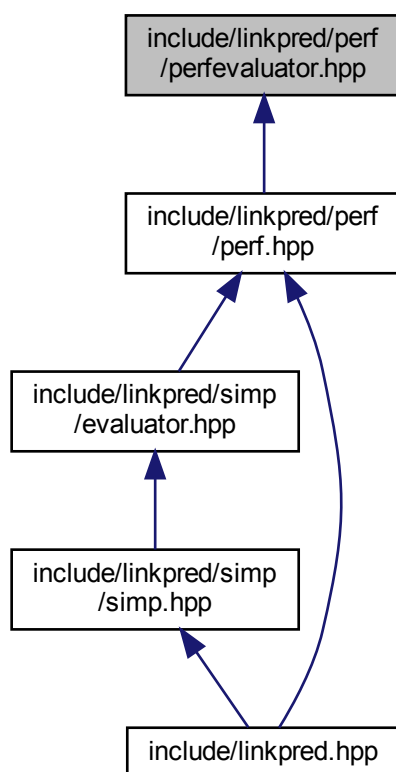

## Classes

- class `LinkPred::PerfEvaluator< TestDataT, LPredictorT, PredResultsT, PerfMeasureT >`  
*Performance evaluator.*
- struct `LinkPred::PerfEvalExpDescp< Network >`  
*Structure storing experiment description.*
- class `LinkPred::PEFactory< Network, LPredictorT, TestDataT, PerfMeasureT >`  
*Factory class to create link predictors and performance measures.*
- class `LinkPred::PerfEvalExp< Network, TestDataT, LPredictorT, PredResultsT, PerfMeasureT >`  
*Performance evaluation experiment.*

## Namespaces

- [LinkPred](#)

*Main namespace.*

### 10.55.1 Detailed Description

Includes the headers related to core classes.

## 10.56 include/linkpred/perf/perfmeasure.hpp File Reference

Contains the implementation of several performance measures.

```
#include "LinkPredConfig.hpp"
#include <linkpred/utils/miscutils.hpp>
#include "linkpred/perf/predresults.hpp"
#include "linkpred/utils/log.hpp"
#include <vector>
#include <algorithm>
#include <map>
#include <string>
#include <cmath>
```

Include dependency graph for perfmeasure.hpp:

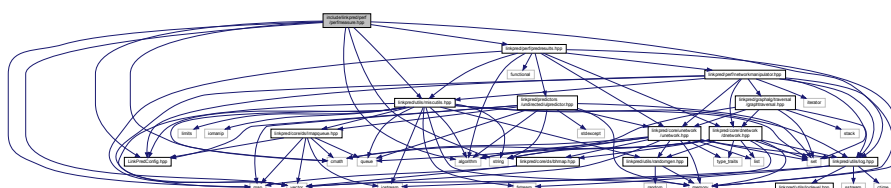

This graph shows which files directly or indirectly include this file:

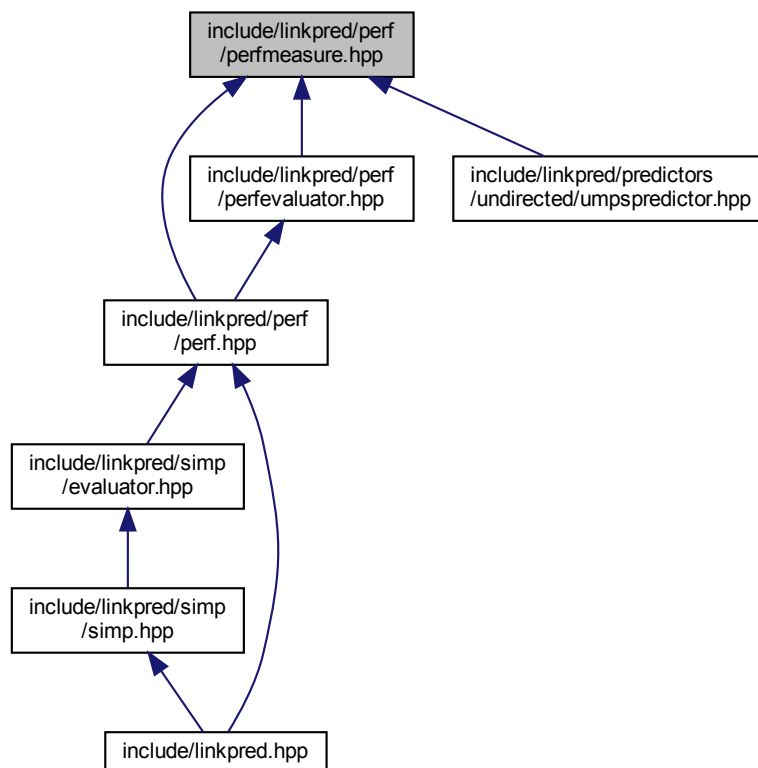

## Classes

- class [LinkPred::PerfMeasure< PredResultsT >](#)  
*Abstract performance measure.*
- class [LinkPred::PerfCurve< PredResultsT >](#)  
*Abstract performance curve.*
- class [LinkPred::ROC< PredResultsT >](#)  
*Receiver Operating Characteristic curve.*
- class [LinkPred::PR< PredResultsT >](#)  
*The precision recall curve.*
- class [LinkPred::TPR< PredResultsT >](#)  
*Compute top precision.*
- class [LinkPred::GCurve< PredResultsT >](#)  
*General performance curve.*

## Namespaces

- [LinkPred](#)  
*Main namespace.*

## Typedefs

- using [LinkPred::PerfResults](#) = std::map< std::string, double >
- using [LinkPred::PerfLambda::PerfLambdaT](#) = std::function< double(std::size\_t tp, std::size\_t fn, std::size\_t tn, std::size\_t fp, std::size\_t P, std::size\_t N)>

## Variables

- auto [LinkPred::PerfLambda::rec](#)
- auto [LinkPred::PerfLambda::fpr](#)
- auto [LinkPred::PerfLambda::pre](#)
- auto [LinkPred::PerfLambda::fnr](#)
- auto [LinkPred::PerfLambda::tnr](#)
- auto [LinkPred::PerfLambda::fmr](#)
- auto [LinkPred::PerfLambda::acc](#)
- auto [LinkPred::PerfLambda::fdr](#)
- auto [LinkPred::PerfLambda::npv](#)

### 10.56.1 Detailed Description

Contains the implementation of several performance measures.

### 10.56.2 Typedef Documentation

#### 10.56.2.1 PerfLambdaT

```
using LinkPred::PerfLambda::PerfLambdaT = typedef std::function<double(std::size_t tp, std::size_t fn, std::size_t tn, std::size_t fp, std::size_t P, std::size_t N)>
```

Signature of performance lambdas.

### 10.56.3 Variable Documentation

#### 10.56.3.1 acc

```
auto LinkPred::PerfLambda::acc
```

##### Initial value:

```
= [] (std::size_t tp, std::size_t fn, std::size_t tn, std::size_t fp,
    std::size_t P, std::size_t N) {
    return (double) (tp + tn) / (P + N);
}
```

Accuracy.

**Parameters**

|           |                                |
|-----------|--------------------------------|
| <i>tp</i> | The number of true positives.  |
| <i>fn</i> | The number of false negatives. |
| <i>tn</i> | The number of true negatives.  |
| <i>fp</i> | The number of false positives. |
| <i>P</i>  | The number of positives.       |
| <i>N</i>  | The number of negatives.       |

**10.56.3.2 fdr**

```
auto LinkPred::PerfLambda::fdr
```

**Initial value:**

```
= [](std::size_t tp, std::size_t fn, std::size_t tn, std::size_t fp,  
    std::size_t P, std::size_t N) {  
    return (double) fp / (tp + fp);  
}
```

False discovery rate.

**Parameters**

|           |                                |
|-----------|--------------------------------|
| <i>tp</i> | The number of true positives.  |
| <i>fn</i> | The number of false negatives. |
| <i>tn</i> | The number of true negatives.  |
| <i>fp</i> | The number of false positives. |
| <i>P</i>  | The number of positives.       |
| <i>N</i>  | The number of negatives.       |

**10.56.3.3 fmr**

```
auto LinkPred::PerfLambda::fmr
```

**Initial value:**

```
= [](std::size_t tp, std::size_t fn, std::size_t tn, std::size_t fp,  
    std::size_t P, std::size_t N) {  
    return (double) fn / (tn + fn);  
}
```

False omission rate.

**Parameters**

|           |                                |
|-----------|--------------------------------|
| <i>tp</i> | The number of true positives.  |
| <i>fn</i> | The number of false negatives. |
| <i>tn</i> | The number of true negatives.  |
| <i>fp</i> | The number of false positives. |
| <i>P</i>  | The number of positives.       |
| <i>N</i>  | The number of negatives.       |

### 10.56.3.4 fnr

```
auto LinkPred::PerfLambda::fnr
```

**Initial value:**

```
= [](std::size_t tp, std::size_t fn, std::size_t tn, std::size_t fp,  
    std::size_t P, std::size_t N) {  
    return (double) fn / P;  
}
```

False negative rate.

**Parameters**

|           |                                |
|-----------|--------------------------------|
| <i>tp</i> | The number of true positives.  |
| <i>fn</i> | The number of false negatives. |
| <i>tn</i> | The number of true negatives.  |
| <i>fp</i> | The number of false positives. |
| <i>P</i>  | The number of positives.       |
| <i>N</i>  | The number of negatives.       |

### 10.56.3.5 fpr

```
auto LinkPred::PerfLambda::fpr
```

**Initial value:**

```
= [](std::size_t tp, std::size_t fn, std::size_t tn, std::size_t fp,  
    std::size_t P, std::size_t N) {  
    return (double) fp / N;  
}
```

False positive rate.

**Parameters**

|           |                                |
|-----------|--------------------------------|
| <i>tp</i> | The number of true positives.  |
| <i>fn</i> | The number of false negatives. |
| <i>tn</i> | The number of true negatives.  |
| <i>fp</i> | The number of false positives. |
| <i>P</i>  | The number of positives.       |
| <i>N</i>  | The number of negatives.       |

### 10.56.3.6 npv

```
auto LinkPred::PerfLambda::npv
```

**Initial value:**

```
= [](std::size_t tp, std::size_t fn, std::size_t tn, std::size_t fp,
    std::size_t P, std::size_t N) {
    return (double) tn / (tn + fn);
}
```

Negative predictive value.

**Parameters**

|           |                                |
|-----------|--------------------------------|
| <i>tp</i> | The number of true positives.  |
| <i>fn</i> | The number of false negatives. |
| <i>tn</i> | The number of true negatives.  |
| <i>fp</i> | The number of false positives. |
| <i>P</i>  | The number of positives.       |
| <i>N</i>  | The number of negatives.       |

**10.56.3.7 pre**

```
auto LinkPred::PerfLambda::pre
```

**Initial value:**

```
= [](std::size_t tp, std::size_t fn, std::size_t tn, std::size_t fp,
    std::size_t P, std::size_t N) {
    return (double) tp / (tp + fp);
}
```

Precision.

**Parameters**

|           |                                |
|-----------|--------------------------------|
| <i>tp</i> | The number of true positives.  |
| <i>fn</i> | The number of false negatives. |
| <i>tn</i> | The number of true negatives.  |
| <i>fp</i> | The number of false positives. |
| <i>P</i>  | The number of positives.       |
| <i>N</i>  | The number of negatives.       |

**10.56.3.8 rec**

```
auto LinkPred::PerfLambda::rec
```

**Initial value:**

```
= [](std::size_t tp, std::size_t fn, std::size_t tn, std::size_t fp,
    std::size_t P, std::size_t N) {
    return (double) tp / P;
}
```

Recall.



## Parameters

|           |                                |
|-----------|--------------------------------|
| <i>tp</i> | The number of true positives.  |
| <i>fn</i> | The number of false negatives. |
| <i>tn</i> | The number of true negatives.  |
| <i>fp</i> | The number of false positives. |
| <i>P</i>  | The number of positives.       |
| <i>N</i>  | The number of negatives.       |

**10.56.3.9 tnr**

```
auto LinkPred::PerfLambda::tnr
```

**Initial value:**

```
= [] (std::size_t tp, std::size_t fn, std::size_t tn, std::size_t fp,
      std::size_t P, std::size_t N) {
    return (double) tn / N;
}
```

True negative rate.

## Parameters

|           |                                |
|-----------|--------------------------------|
| <i>tp</i> | The number of true positives.  |
| <i>fn</i> | The number of false negatives. |
| <i>tn</i> | The number of true negatives.  |
| <i>fp</i> | The number of false positives. |
| <i>P</i>  | The number of positives.       |
| <i>N</i>  | The number of negatives.       |

**10.57 include/linkpred/perf/predresults.hpp File Reference**

Contains the implementation of a class to store and manage prediction results.

```
#include <linkpred/predictors/undirected/ulpredictor.hpp>
#include <linkpred/utils/miscutils.hpp>
#include "linkpred/core/unetwork/unetwork.hpp"
#include "linkpred/core/dnetwork/dnetwork.hpp"
#include "linkpred/perf/networkmanipulator.hpp"
#include <vector>
#include <memory>
#include <algorithm>
#include <functional>
```

Include dependency graph for `predresults.hpp`:

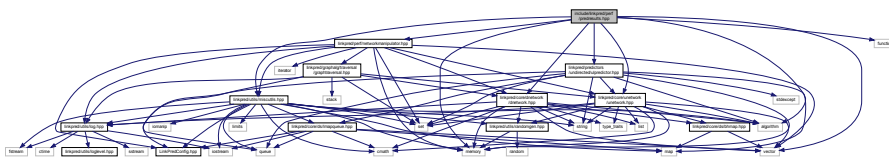

This graph shows which files directly or indirectly include this file:

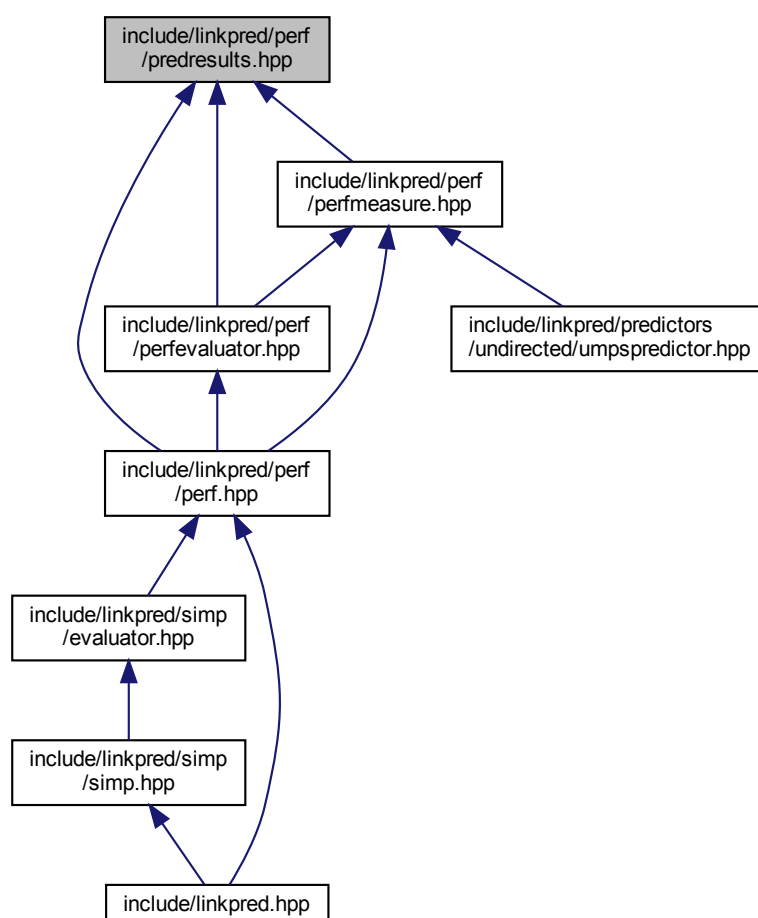

## Classes

- class [LinkPred::PredResults< TestDataT, LPredictorT, ScoresContainerT >](#)  
A class to store and manage prediction results.
- class [LinkPred::PredResults< TestDataT, LPredictorT, ScoresContainerT >::ScoreIterator](#)  
Score iterator.

- LinkPred

*Main namespace.*

Contains the implementation of a class to store and manage prediction results.

Contains the implementation of a common neighbor link predictor.

[illegible]

This graph shows which files directly or indirectly include this file:

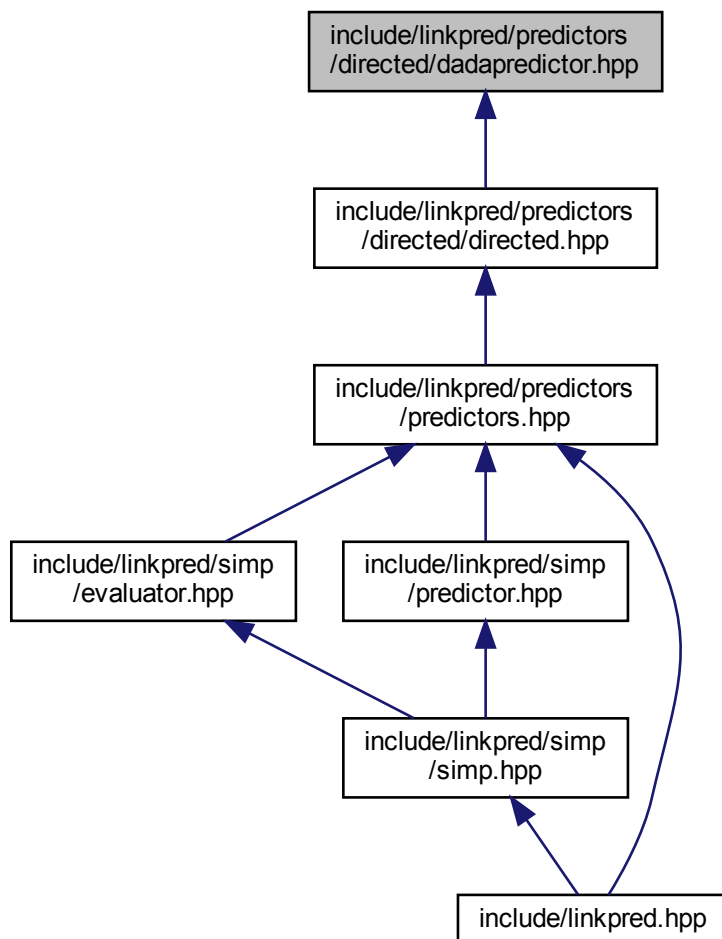

## Classes

- class [LinkPred::DADAPredictor< Network, EdgeRndIt, ScoreRndIt, EdgeRndOutIt >](#)  
*Common neighbor link predictor adapted to directed networks.*

## Namespaces

- [LinkPred](#)  
*Main namespace.*

### 10.58.1 Detailed Description

Contains the implementation of a common neighbor link predictor.





This graph shows which files directly or indirectly include this file:

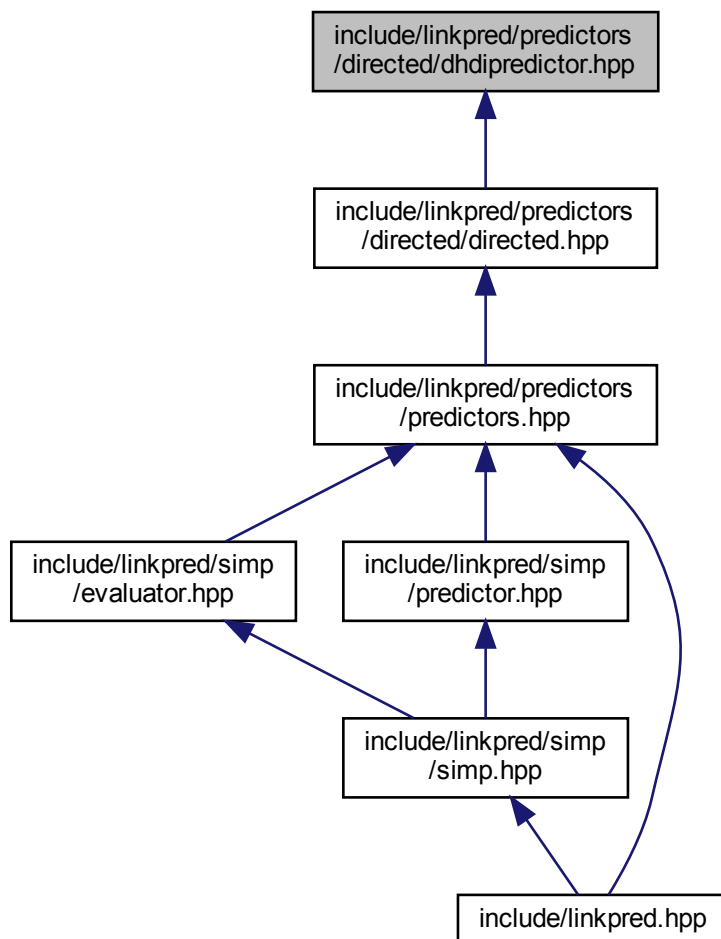

## Classes

- class [LinkPred::DHDIPredictor< Network, EdgeRndIt, ScoreRndIt, EdgeRndOutIt >](#)  
*Common neighbor link predictor adapted to directed networks.*

## Namespaces

- [LinkPred](#)  
*Main namespace.*

### 10.60.1 Detailed Description

Contains the implementation of a common neighbor link predictor.







This graph shows which files directly or indirectly include this file:

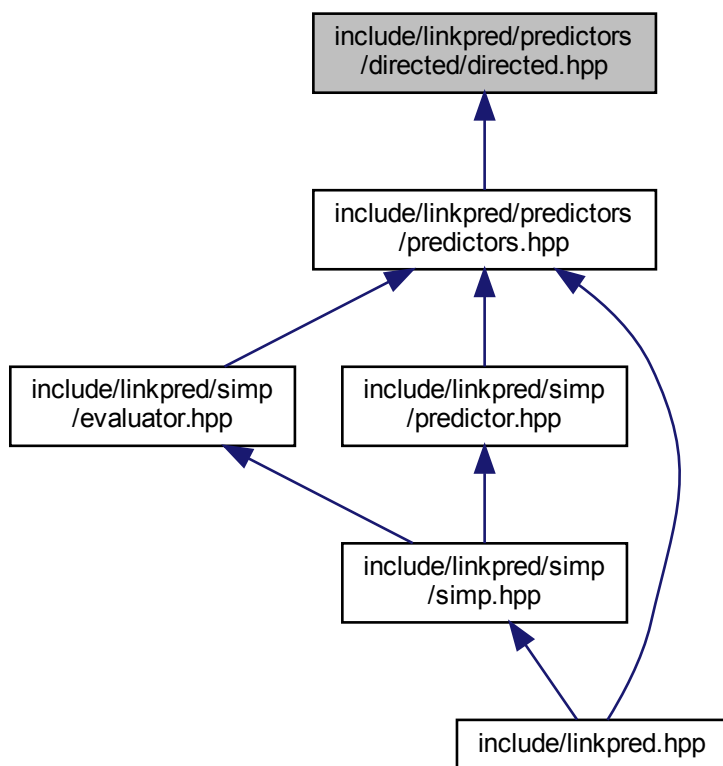

### 10.62.1 Detailed Description

Includes the headers of link predictors for directed networks.

## 10.63 include/linkpred/predictors/directed/djidpredictor.hpp File Reference

Contains the implementation of a common neighbor link predictor.

```
#include "linkpred/predictors/directed/dlpredictor.hpp"
```

```
#include <memory>
```

Include dependency graph for djidpredictor.hpp:

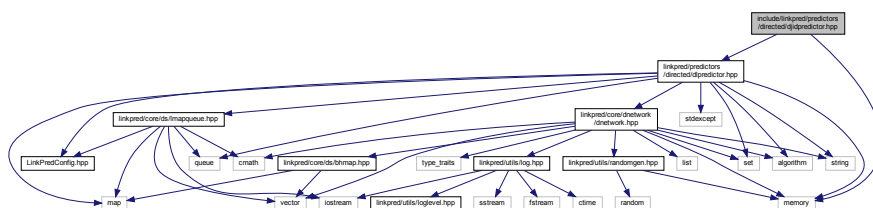

This graph shows which files directly or indirectly include this file:

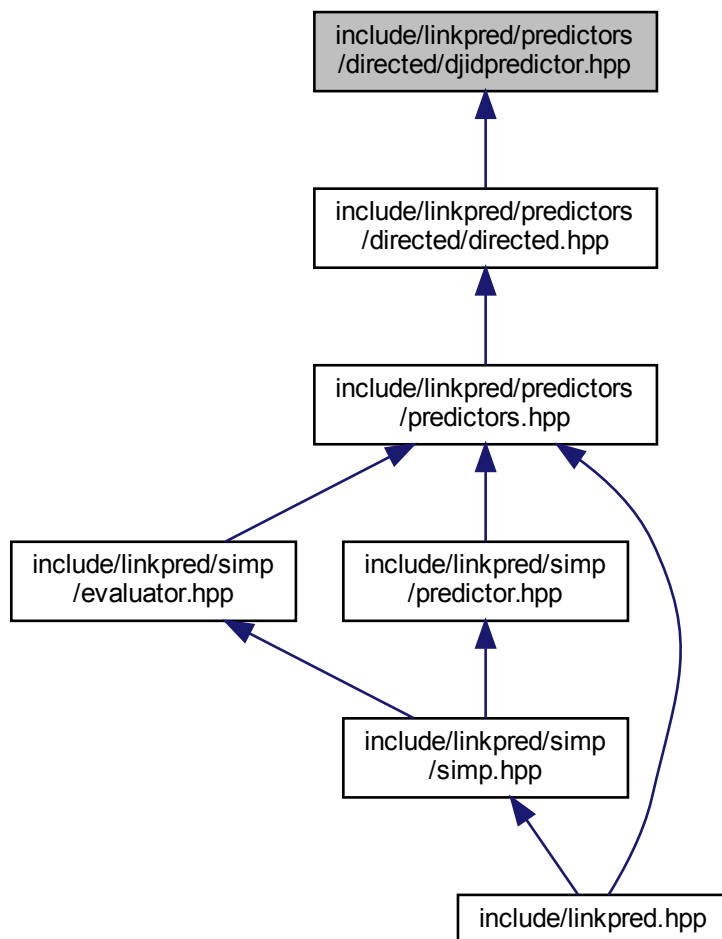

## Classes

- class `LinkPred::DJIDPredictor< Network, EdgeRndIt, ScoreRndIt, EdgeRndOutIt >`  
*Common neighbor link predictor adapted to directed networks.*

## Namespaces

- LinkPred
- Main namespace.*

### 10.63.1 Detailed Description

Contains the implementation of a common neighbor link predictor.



## Classes

- class [LinkPred::DLCPPredictor< Network, EdgeRndIt, ScoreRndIt, EdgeRndOutIt >](#)

*Common neighbor link predictor adapted to directed networks.*

## Namespaces

- [LinkPred](#)

*Main namespace.*

### 10.64.1 Detailed Description

Contains the implementation of a directed LCP link predictor.

## 10.65 include/linkpred/predictors/directed/dlhnpredictor.hpp File Reference

Contains the implementation of a common neighbor link predictor.

```
#include "linkpred/predictors/directed/dlpredictor.hpp"
```

```
#include <memory>
```

Include dependency graph for dlhnpredictor.hpp:

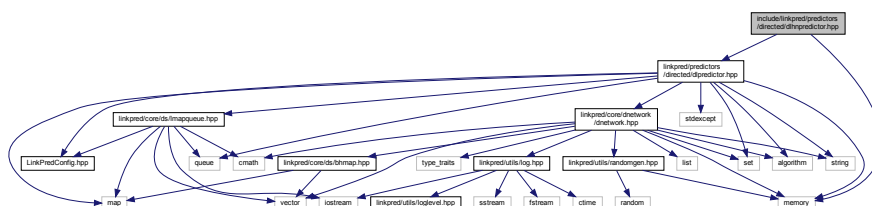

This graph shows which files directly or indirectly include this file:

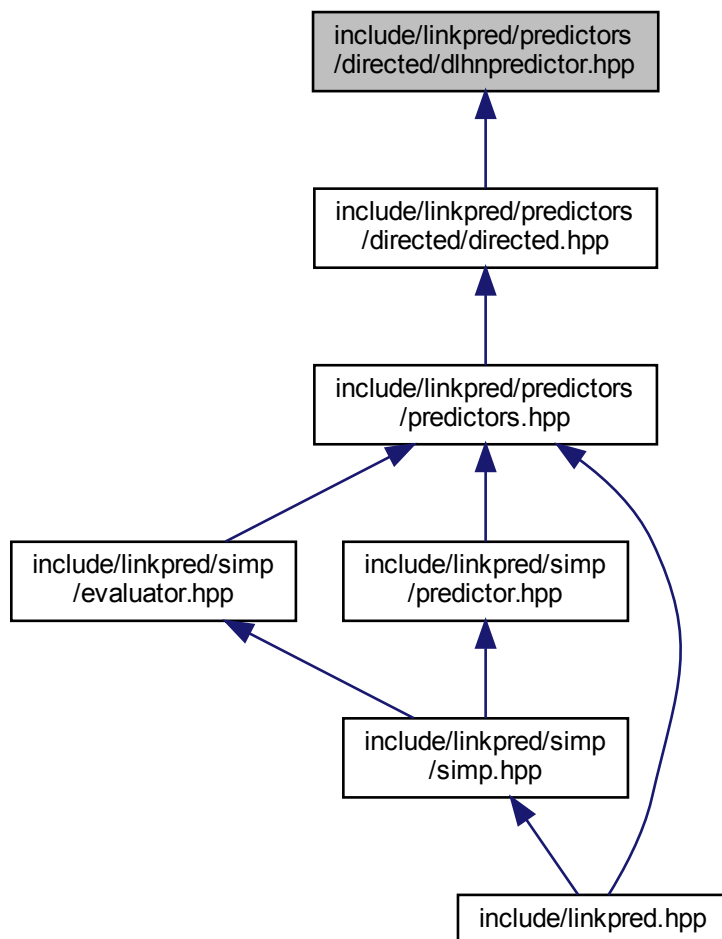

## Classes

- class [LinkPred::DLHNPredictor< Network, EdgeRndIt, ScoreRndIt, EdgeRndOutIt >](#)  
*Common neighbor link predictor adapted to directed networks.*

## Namespaces

- [LinkPred](#)  
*Main namespace.*

### 10.65.1 Detailed Description

Contains the implementation of a common neighbor link predictor.







## Classes

- `class LinkPred::DPATPredictor< Network, EdgeRndIt, ScoreRndIt, EdgeRndOutIt >`

*Common neighbor link predictor adapted to directed networks.*

## Namespaces

- LinkPred

*Main namespace.*

### 10.67.1 Detailed Description

Contains the implementation of a common neighbor link predictor.

## 10.68 include/linkpred/predictors/directed/dpstpredictor.hpp File Reference

Contains the implementation of a link predictor that prestores the scores of edges.

```
#include <linkpred/predictors/directed/dlpredictor.hpp>
```

```
#include <memory>
```

Include dependency graph for dpstpredictor.hpp:

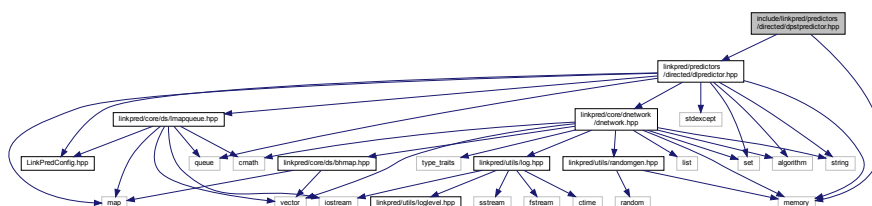

This graph shows which files directly or indirectly include this file:

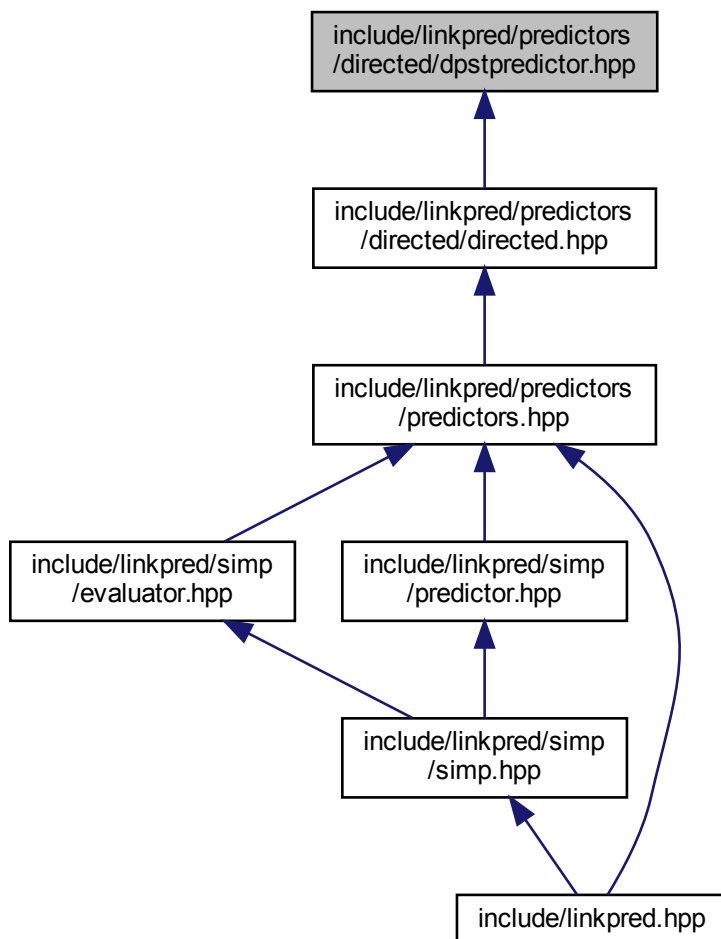

## Classes

- class [LinkPred::DPSTPredictor](#)< [Network](#), [EdgeRndIt](#), [ScoreRndIt](#), [EdgeRndOutIt](#) >

A link predictor that prestores edge scores. This allows to seemingly integrate results from external link prediction algorithms to [LinkPred](#) (for example, users may implement their own link prediction algorithm and then use this link predictor to use compare their results to algorithms available in [LinkPred](#)).

## Namespaces

- [LinkPred](#)

Main namespace.

### 10.68.1 Detailed Description

Contains the implementation of a link predictor that prestores the scores of edges.





This graph shows which files directly or indirectly include this file:

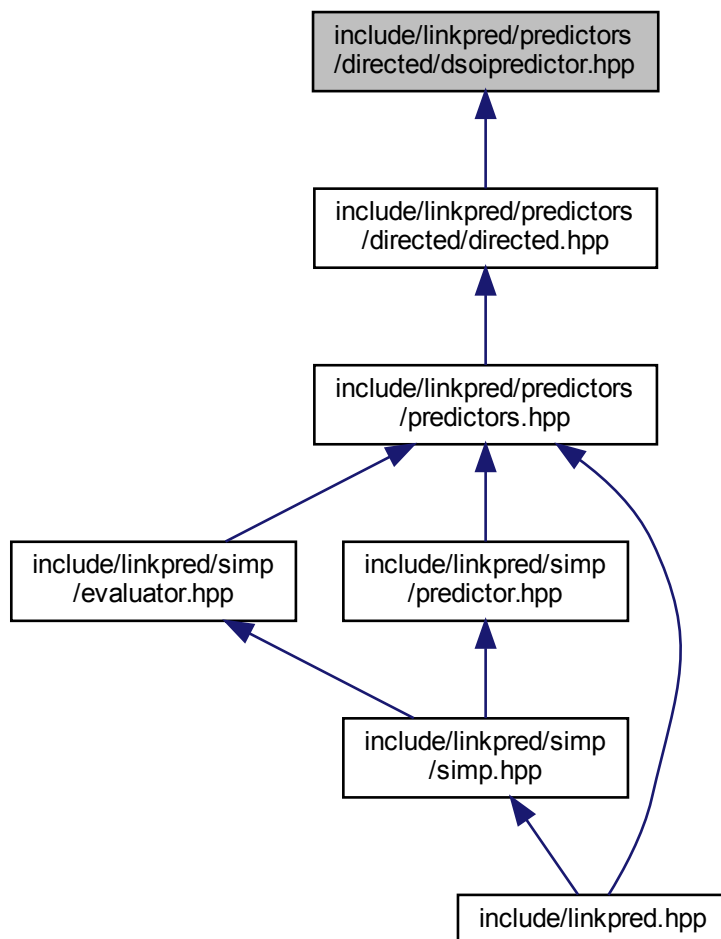

## Classes

- class [LinkPred::DSOIPredictor< Network, EdgeRndIt, ScoreRndIt, EdgeRndOutIt >](#)  
*Common neighbor link predictor adapted to directed networks.*

## Namespaces

- [LinkPred](#)  
*Main namespace.*

### 10.70.1 Detailed Description

Contains the implementation of a common neighbor link predictor.

## 10.71 include/linkpred/predictors/predictors.hpp File Reference

Includes the headers of link predictors.

```
#include "linkpred/predictors/directed/directed.hpp"
#include "linkpred/predictors/undirected/undirected.hpp"
Include dependency graph for predictors.hpp:
```

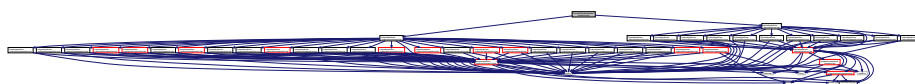

This graph shows which files directly or indirectly include this file:

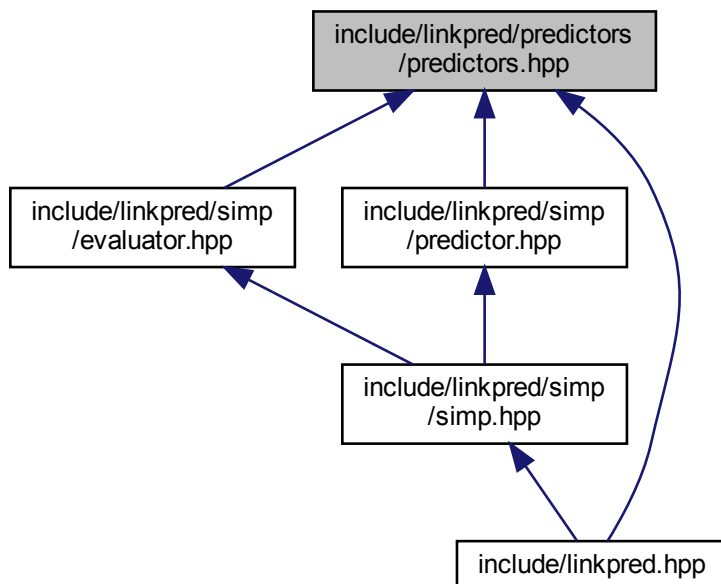

### 10.71.1 Detailed Description

Includes the headers of link predictors.

## 10.72 include/linkpred/predictors/undirected/uadapredictor.hpp File Reference

Contains the implementation of an Adamic Adar index link predictor.

```
#include <memory>
```

```
graph BT; A["include/linkpred/predictors/undirected/uadapredictor.hpp"] --> B["include/linkpred/predictors/undirected/undirected.hpp"]; B --> C["include/linkpred/predictors/predictors.hpp"]; C --> D["include/linkpred/simp/evaluator.hpp"]; C --> E["include/linkpred/simp/predictor.hpp"]; D --> E; F["include/linkpred/simp/simp.hpp"] --> E; G["include/linkpred.hpp"] --> F; G --> E;
```

- `class LinkPred::UADAPredictor< Network, EdgeRndIt, ScoreRndIt, EdgeRndOutIt >`

Generated by Doxygen





This graph shows which files directly or indirectly include this file:

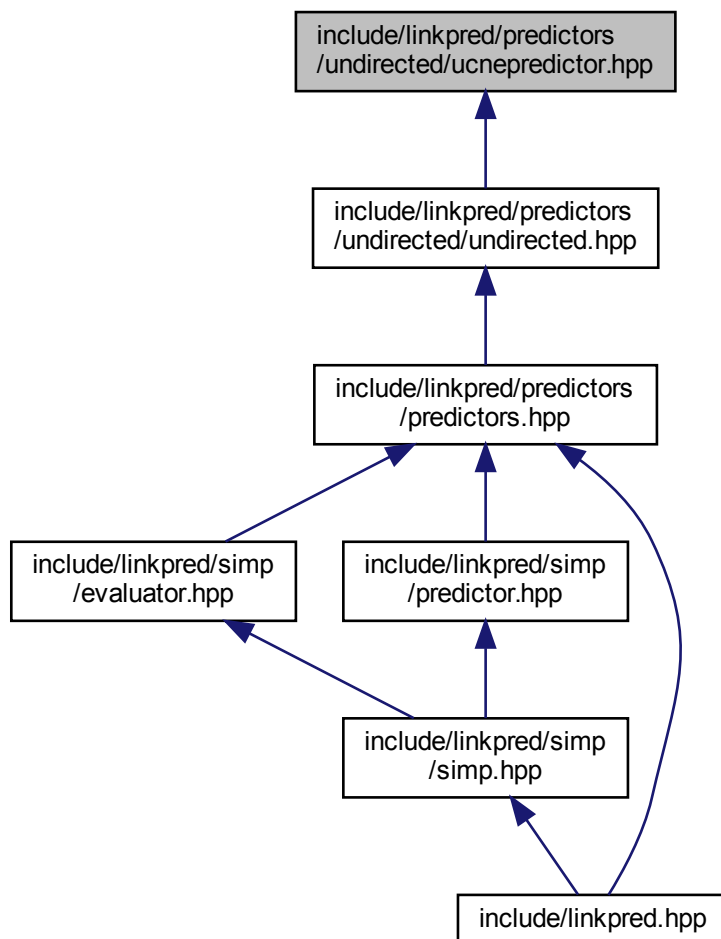

## Classes

- class [LinkPred::UCNEPredictor< Network, EdgeRndIt, ScoreRndIt, EdgeRndOutIt >](#)  
*Common neighbor link predictor.*

## Namespaces

- [LinkPred](#)  
*Main namespace.*

### 10.73.1 Detailed Description

Contains the implementation of a common neighbor link predictor.

## 10.74 include/linkpred/predictors/undirected/ucrapredictor.hpp File Reference

Contains the implementation of the Cannistraci Resource Allocation link predictor.

```
#include <linkpred/predictors/undirected/ulpredictor.hpp>
```

```
#include <memory>
```

Include dependency graph for ucrapredictor.hpp:

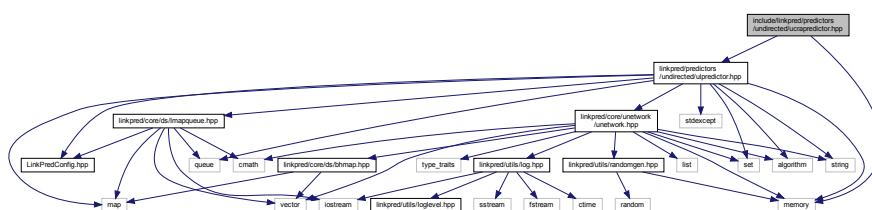

This graph shows which files directly or indirectly include this file:

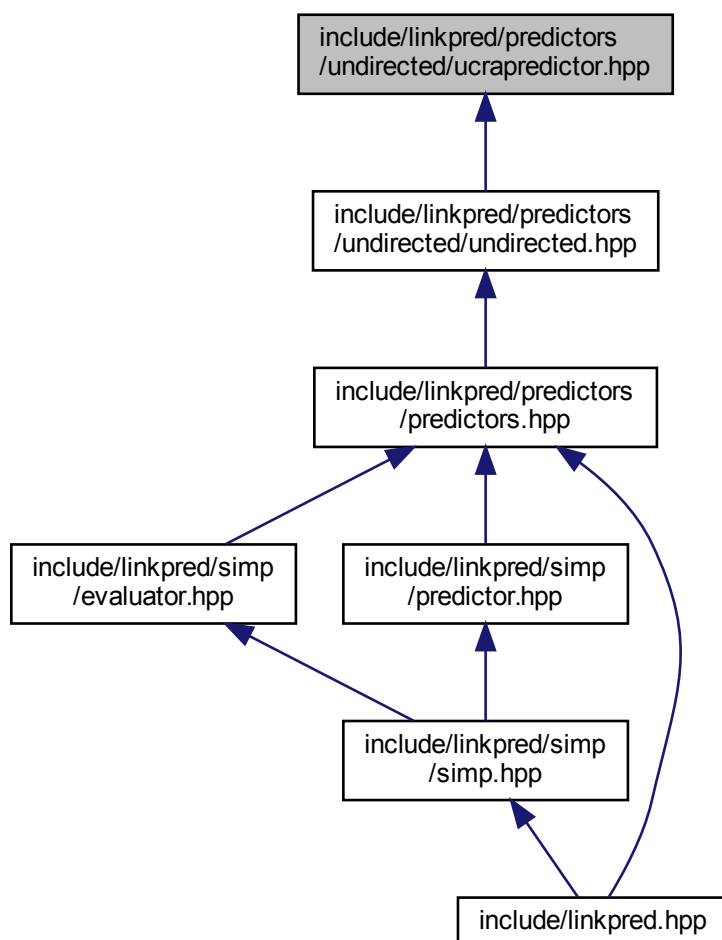

## Classes

- `class LinkPred::UCRAPredictor< Network, EdgeRndIt, ScoreRndIt, EdgeRndOutIt >`

*Local path link predictor.*

## Namespaces

- LinkPred

*Main namespace.*

### 10.74.1 Detailed Description

Contains the implementation of the Cannistraci Resource Allocation link predictor.

## 10.75 include/linkpred/predictors/undirected/ucstp predictor.hpp File Reference

Contains the implementation of a constant link predictor.

```
#include <linkpred/predictors/undirected/ulpredictor.hpp>
```

```
#include <memory>
```

Include dependency graph for ucstp predictor.hpp:

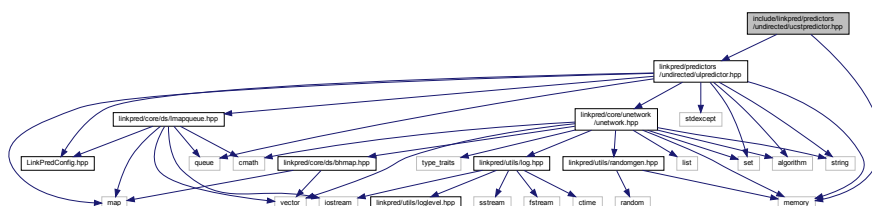

This graph shows which files directly or indirectly include this file:

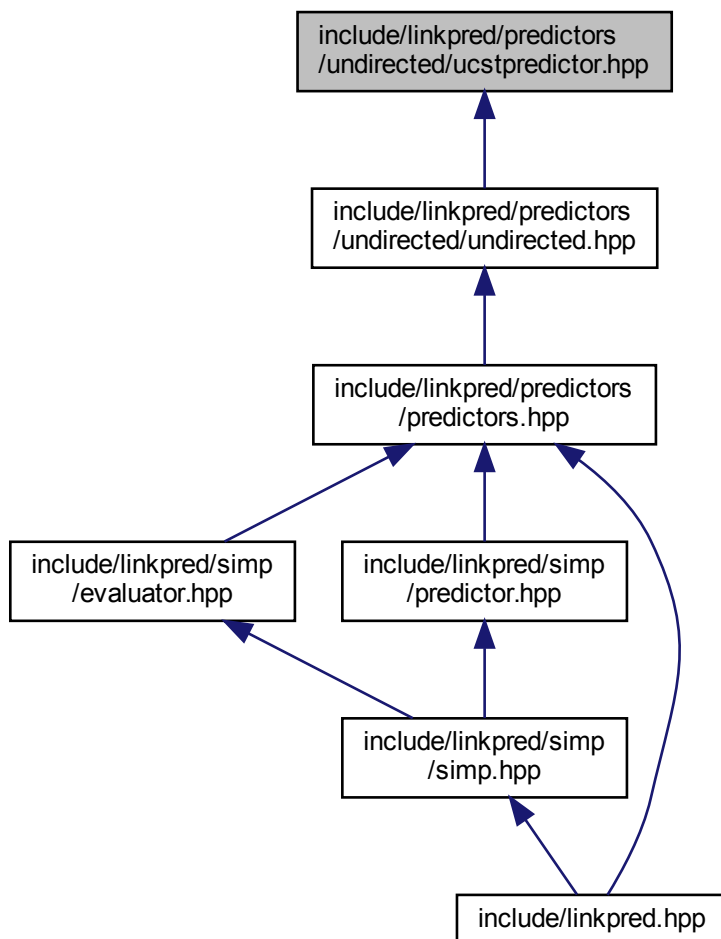

## Classes

- class [LinkPred::UCSTPredictor< Network, EdgeRndIt, ScoreRndIt, EdgeRndOutIt >](#)  
*Constant link predictor.*

## Namespaces

- [LinkPred](#)  
*Main namespace.*

### 10.75.1 Detailed Description

Contains the implementation of a constant link predictor.

## 10.76 include/linkpred/predictors/undirected/ueclpredictor.hpp File Reference

Contains the implementation of an encoder-classifier link predictor.

```
#include <linkpred/predictors/undirected/ulpredictor.hpp>
#include <linkpred/graphalg/encoders/encoders.hpp>
#include <linkpred/ml/classifiers/classifiers.hpp>
#include <memory>
```

Include dependency graph for ueclpredictor.hpp:

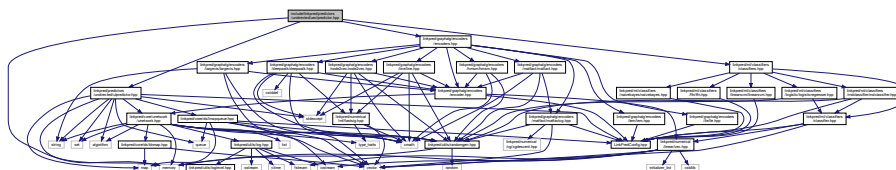

This graph shows which files directly or indirectly include this file:

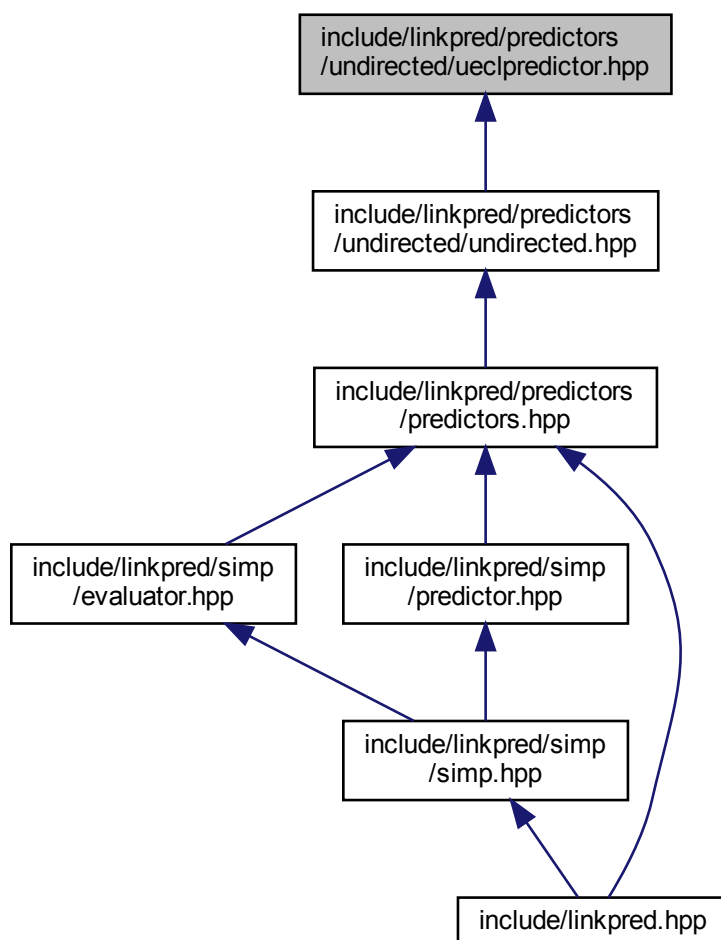

## Classes

- class [LinkPred::UECLPredictor](#)< [Network](#), [EdgeRndIt](#), [ScoreRndIt](#), [EdgeRndOutIt](#) >

*Encoder-classifier link predictor.*

## Namespaces

- [LinkPred](#)

*Main namespace.*

### 10.76.1 Detailed Description

Contains the implementation of an encoder-classifier link predictor.

### 10.77 `include/linkpred/predictors/undirected/uesmpredictor.hpp` File Reference

Contains the implementation of an encoder-similarity measure link predictor.

```
#include <linkpred/predictors/undirected/ulpredictor.hpp>
#include <linkpred/graphalg/encoders/encoders.hpp>
#include <linkpred/ml/simmeasures/simmeasures.hpp>
#include <memory>
```

Include dependency graph for `uesmpredictor.hpp`:

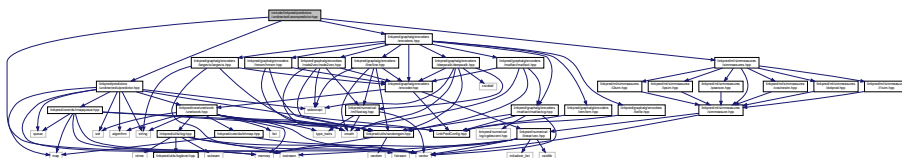

This graph shows which files directly or indirectly include this file:

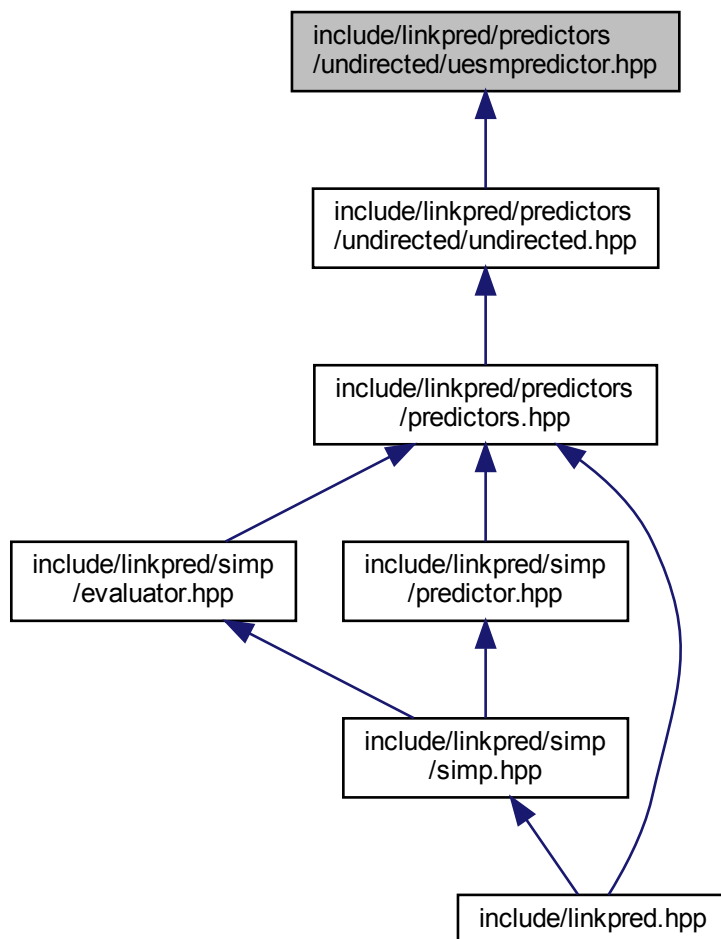

## Classes

- class [LinkPred::UESMPredictor< Network, EdgeRndIt, ScoreRndIt, EdgeRndOutIt >](#)  
*Encoder-Similarity measure link predictor.*

## Namespaces

- [LinkPred](#)  
*Main namespace.*

### 10.77.1 Detailed Description

Contains the implementation of an encoder-similarity measure link predictor.





## Classes

- class [LinkPred::UFBMPredictor< Network, EdgeRndIt, ScoreRndIt, EdgeRndOutIt >](#)

*Fast blocking model link predictor.*

## Namespaces

- [LinkPred](#)

*Main namespace.*

### 10.78.1 Detailed Description

Contains the implementation of the fast blocking model link predictor.

## 10.79 include/linkpred/predictors/undirected/uhdipredictor.hpp File Reference

Contains the implementation of a hub depromoted index link predictor.

```
#include <linkpred/predictors/undirected/ulpredictor.hpp>
```

```
#include <memory>
```

Include dependency graph for uhdipredictor.hpp:

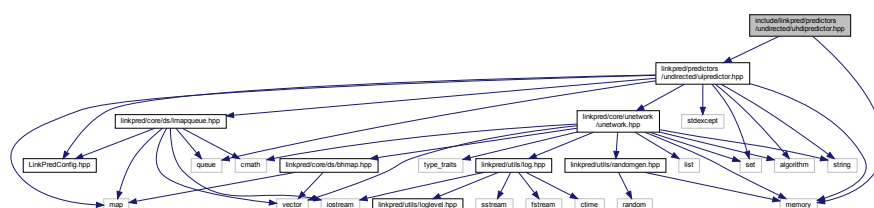

This graph shows which files directly or indirectly include this file:

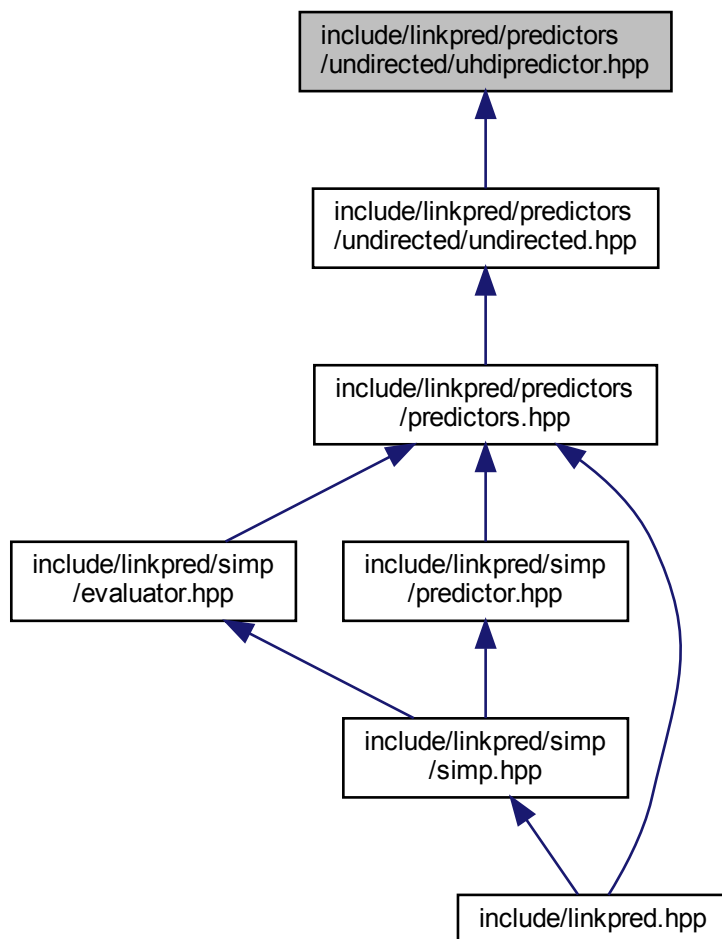

## Classes

- class [LinkPred::UHDIPredictor< Network, EdgeRndIt, ScoreRndIt, EdgeRndOutIt >](#)  
*Hub depromoted index link predictor.*

## Namespaces

- [LinkPred](#)  
*Main namespace.*

### 10.79.1 Detailed Description

Contains the implementation of a hub depromoted index link predictor.



## Classes

- class [LinkPred::UHPIPredictor](#)< [Network](#), [EdgeRndIt](#), [ScoreRndIt](#), [EdgeRndOutIt](#) >

*Hub promoted index link predictor.*

## Namespaces

- [LinkPred](#)

*Main namespace.*

### 10.80.1 Detailed Description

Contains the implementation of a hub promoted index link predictor.

## 10.81 `include/linkpred/predictors/undirected/uhrgpredictor.hpp` File Reference

Contains the implementation of the HRG link predictor.

```
#include <linkpred/predictors/undirected/uhrgpredictor/dendro_pr.hpp>
#include <linkpred/predictors/undirected/uhrgpredictor/graph_pr.h>
#include <linkpred/predictors/undirected/uhrgpredictor/graph_simp.h>
#include <linkpred/predictors/undirected/uhrgpredictor/rbtree.h>
#include <linkpred/predictors/undirected/ulpredictor.hpp>
#include "linkpred/utils/randomgen.hpp"
#include <string>
#include <map>
```

Include dependency graph for `uhrgpredictor.hpp`:

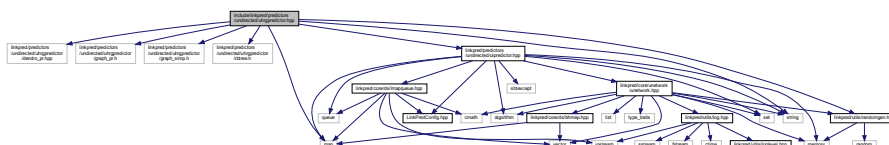

This graph shows which files directly or indirectly include this file:

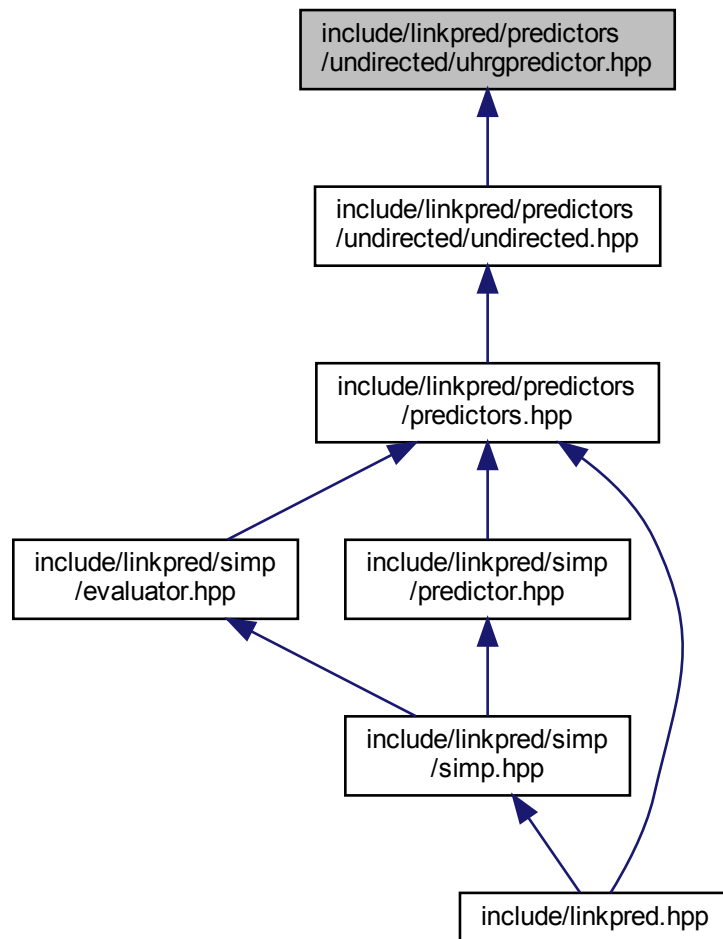

## Classes

- class [LinkPred::UHRGPredictor< Network, EdgeRndIt, ScoreRndIt, EdgeRndOutIt >](#)  
*HRG predictor.*

## Namespaces

- [LinkPred](#)  
*Main namespace.*

### 10.81.1 Detailed Description

Contains the implementation of the HRG link predictor.

## 10.82 include/linkpred/predictors/undirected/uhyppredictor.hpp File Reference

Contains the implementation of the hypermap link predictor.

```
#include <linkpred/predictors/undirected/ulpredictor.hpp>
#include "linkpred/utils/randomgen.hpp"
#include <vector>
#include <memory>
Include dependency graph for uhyppredictor.hpp:
```

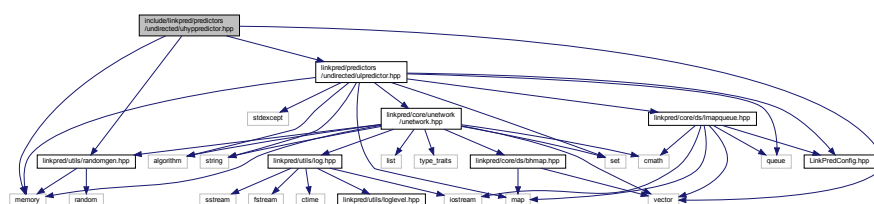

This graph shows which files directly or indirectly include this file:

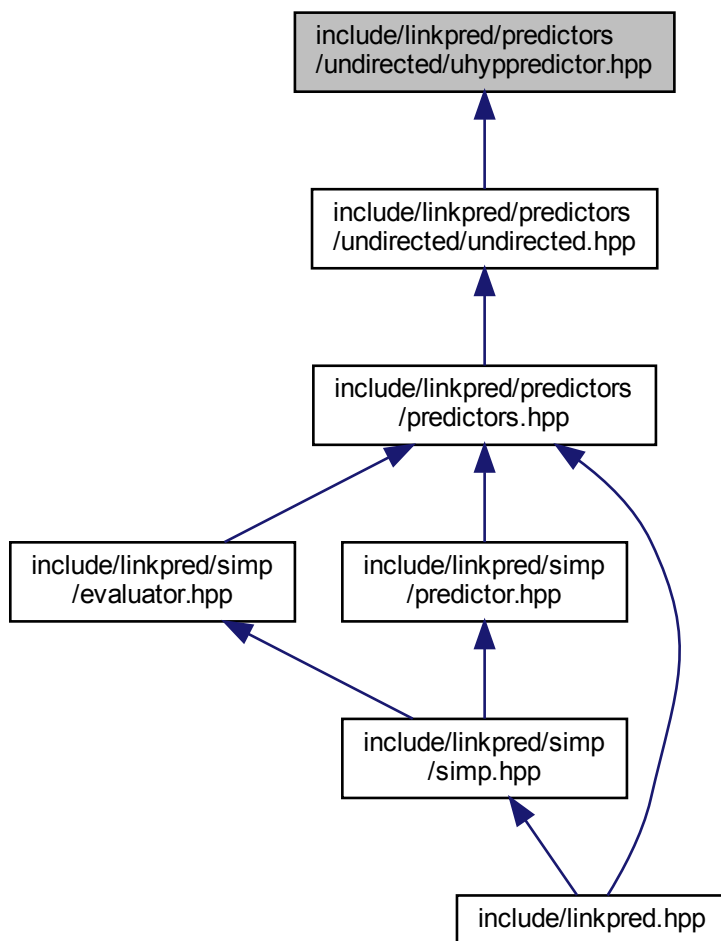

## Classes

- class [LinkPred::UHYPredictor< Network, EdgeRndIt, ScoreRndIt, EdgeRndOutIt >](#)  
*Hypermap predictor.*

## Namespaces

- [LinkPred](#)  
*Main namespace.*

## Variables

- constexpr double [LinkPred::MathPI](#) = 3.141592653589793238462643383279502884L





This graph shows which files directly or indirectly include this file:

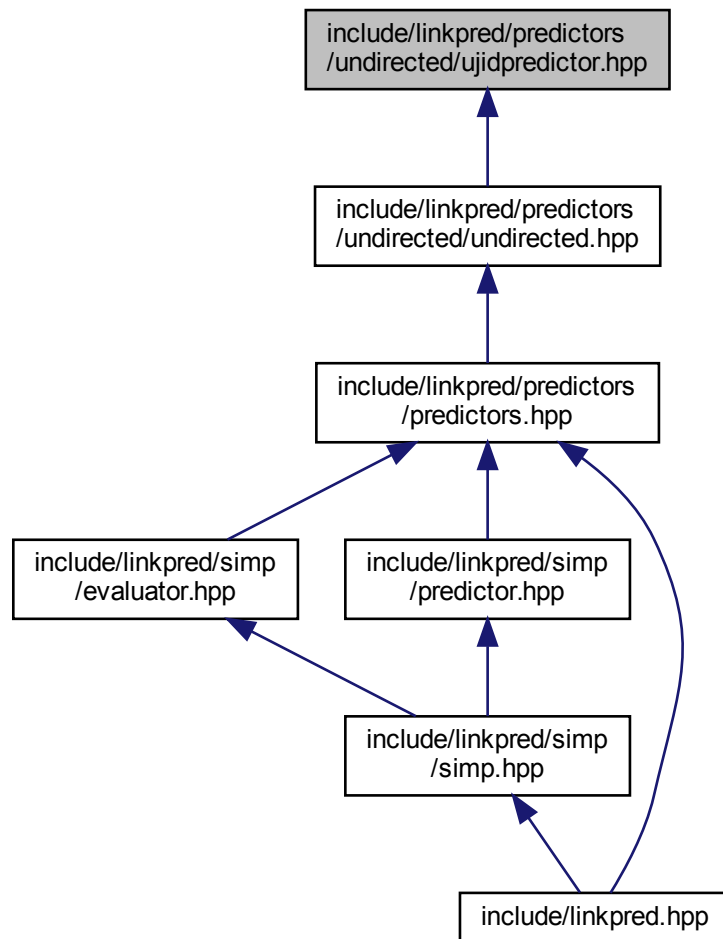

## Classes

- class [LinkPred::UJIDPredictor< Network, EdgeRndIt, ScoreRndIt, EdgeRndOutIt >](#)  
*Jackard index link predictor.*

## Namespaces

- [LinkPred](#)  
*Main namespace.*

### 10.83.1 Detailed Description

Contains the implementation of a Jackard index link predictor.

## 10.84 include/linkpred/predictors/undirected/ukabpredictor.hpp File Reference

Contains the implementation of a scalable popularity-similarity link predictor.

```
#include "linkpred/predictors/undirected/ulpredictor.hpp"
#include "linkpred/graphalg/shortestpaths/netdistcalculator.hpp"
#include "linkpred/utis/log.hpp"
#include <memory>
#include <cmath>
#include <limits>
#include <iostream>
Include dependency graph for ukabpredictor.hpp:
```

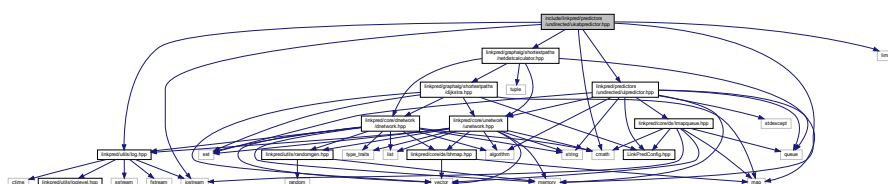

This graph shows which files directly or indirectly include this file:

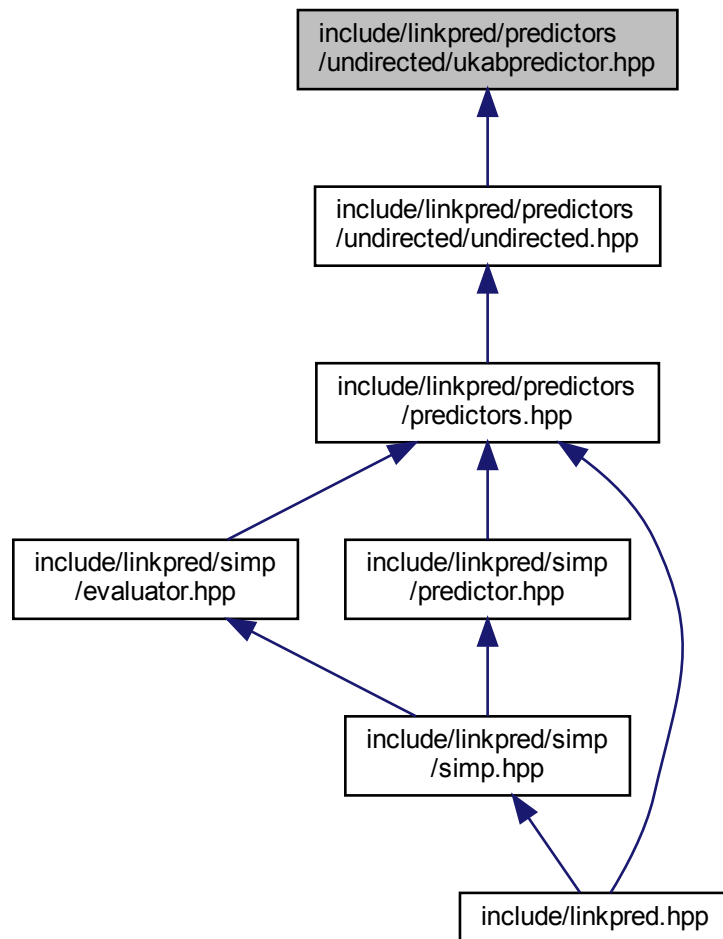

## Classes

- class [LinkPred::UKABPredictor](#)< [Network](#), [EdgeRndIt](#), [ScoreRndIt](#), [EdgeRndOutIt](#) >

A scalable popularity similarity link predictor proposed in: "Kerrache, S., Alharbi, R. & Benhidour, H. A Scalable Similarity-Popularity Link Prediction Method. *Sci Rep* 10, 6394 (2020)". <https://doi.org/10.1038/s41598-020-62636-1>.

## Namespaces

- [LinkPred](#)

Main namespace.

### 10.84.1 Detailed Description

Contains the implementation of a scalable popularity-similarity link predictor.



## Classes

- `class LinkPred::ULCPPredictor< Network, EdgeRndIt, ScoreRndIt, EdgeRndOutIt >`

*Local path link predictor.*

## Namespaces

- LinkPred

*Main namespace.*

### 10.85.1 Detailed Description

Contains the implementation of a local path link predictor.

## 10.86 include/linkpred/predictors/undirected/ulhnpredictor.hpp File Reference

Contains the implementation of a Leicht-Holme-Newman index link predictor.

```
#include <linkpred/predictors/undirected/ulpredictor.hpp>
```

```
#include <memory>
```

Include dependency graph for ulhnpredictor.hpp:

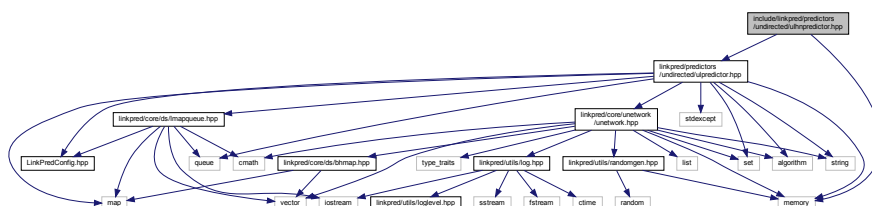

This graph shows which files directly or indirectly include this file:

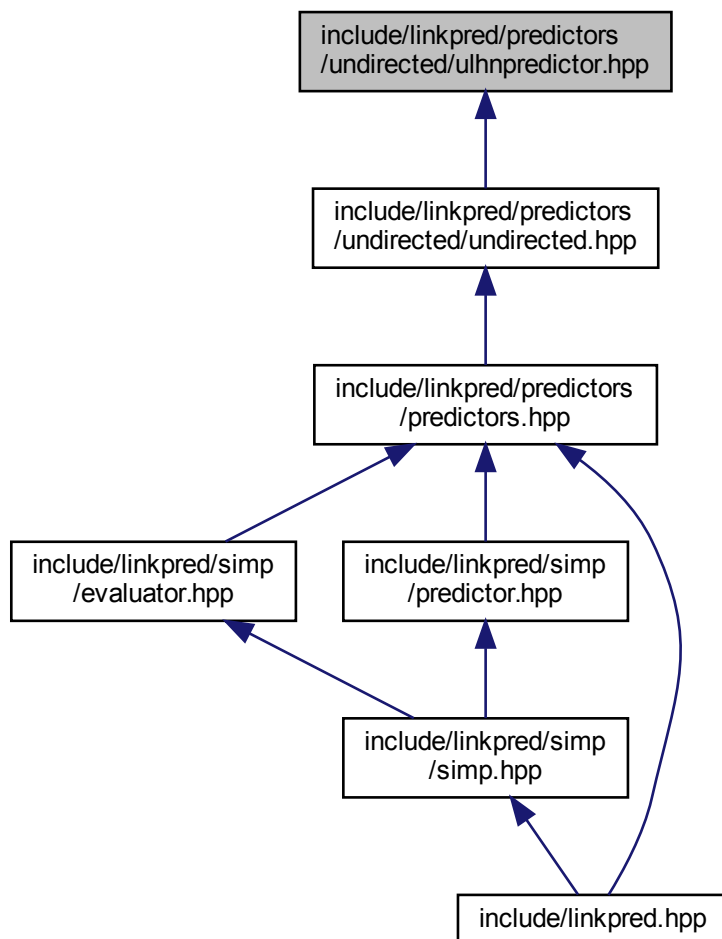

## Classes

- class [LinkPred::ULHNPredictor< Network, EdgeRndIt, ScoreRndIt, EdgeRndOutIt >](#)  
*Leicht-Holme-Newman index link predictor.*

## Namespaces

- [LinkPred](#)  
*Main namespace.*

### 10.86.1 Detailed Description

Contains the implementation of a Leicht-Holme-Newman index link predictor.

## 10.87 include/linkpred/predictors/undirected/ulpredictor.hpp File Reference

Contains the interface of a link predictor.

```
#include "LinkPredConfig.hpp"
#include "linkpred/core/unetwork/unetwork.hpp"
#include "linkpred/core/ds/lmapqueue.hpp"
#include <memory>
#include <map>
#include <string>
#include <stdexcept>
#include <algorithm>
#include <queue>
#include <set>
```

Include dependency graph for ulpredictor.hpp:

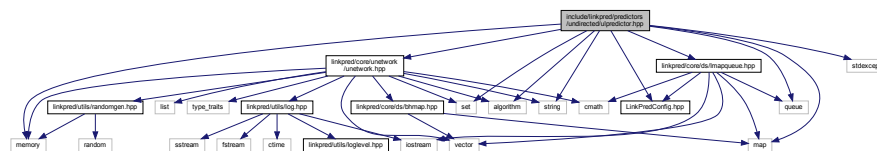

This graph shows which files directly or indirectly include this file:

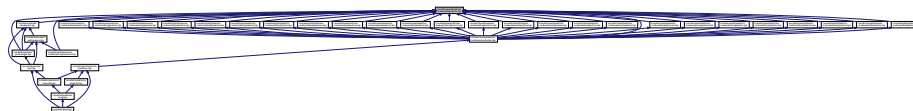

## Classes

- `class LinkPred::ULPredictor< NetworkT, EdgeRndItT, ScoreRndItT, EdgeRndOutItT >`

*The interface of a link predictor in an undirected network.*

## Namespaces

- LinkPred

*Main namespace.*

### 10.87.1 Detailed Description

Contains the interface of a link predictor.

## 10.88 include/linkpred/predictors/undirected/umpsredictor.hpp File Reference

Contains the implementation of a scalable popularity similarity link predictor.

```
#include <linkpred/predictors/undirected/ulpredictor.hpp>
#include "linkpred/graphalg/shortestpaths/netdistcalculator.hpp"
#include "linkpred/perf/perfmeasure.hpp"
#include "linkpred/utils/log.hpp"
#include <memory>
#include <cmath>
#include <limits>
```

Include dependency graph for umpspredictor.hpp:

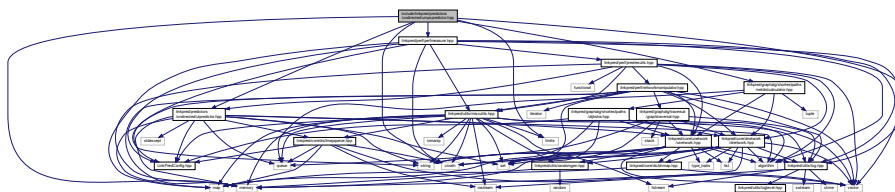

### Classes

- class [LinkPred::UMPSPredictor< Network, EdgeRndIt, ScoreRndIt, EdgeRndOutIt >](#)  
A scalable popularity similarity link predictor.

### Namespaces

- [LinkPred](#)  
Main namespace.

#### 10.88.1 Detailed Description

Contains the implementation of a scalable popularity similarity link predictor.

## 10.89 include/linkpred/predictors/undirected/undirected.hpp File Reference

Includes the headers of link predictors for undirected networks.

```
#include "linkpred/predictors/undirected/uesmpredictor.hpp"
#include "linkpred/predictors/undirected/ueclpredictor.hpp"
#include "linkpred/predictors/undirected/uadapredictor.hpp"
#include "linkpred/predictors/undirected/ucnepredictor.hpp"
#include "linkpred/predictors/undirected/ucrapredictor.hpp"
#include "linkpred/predictors/undirected/ucstpredictor.hpp"
#include "linkpred/predictors/undirected/ufbmpredictor.hpp"
```



```
#include "linkpred/predictors/undirected/uhdipredictor.hpp"
#include "linkpred/predictors/undirected/uhippredictor.hpp"
#include "linkpred/predictors/undirected/uhrgpredictor.hpp"
#include "linkpred/predictors/undirected/uhyppredictor.hpp"
#include "linkpred/predictors/undirected/ujidpredictor.hpp"
#include "linkpred/predictors/undirected/ukabpredictor.hpp"
#include "linkpred/predictors/undirected/ulcppredictor.hpp"
#include "linkpred/predictors/undirected/ulhnpredictor.hpp"
#include "linkpred/predictors/undirected/ulpredictor.hpp"
#include "linkpred/predictors/undirected/unedpredictor.hpp"
#include "linkpred/predictors/undirected/upatpredictor.hpp"
#include "linkpred/predictors/undirected/upstpredictor.hpp"
#include "linkpred/predictors/undirected/uralpredictor.hpp"
#include "linkpred/predictors/undirected/urndpredictor.hpp"
#include "linkpred/predictors/undirected/usaipredictor.hpp"
#include "linkpred/predictors/undirected/usbmpredictor.hpp"
#include "linkpred/predictors/undirected/ushppredictor.hpp"
#include "linkpred/predictors/undirected/usoipredictor.hpp"
#include "linkpred/predictors/undirected/usumpredictor.hpp"
```

Include dependency graph for undirected.hpp:

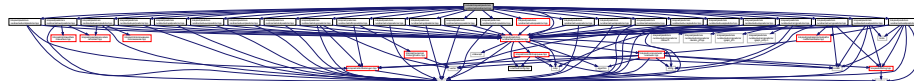

This graph shows which files directly or indirectly include this file:

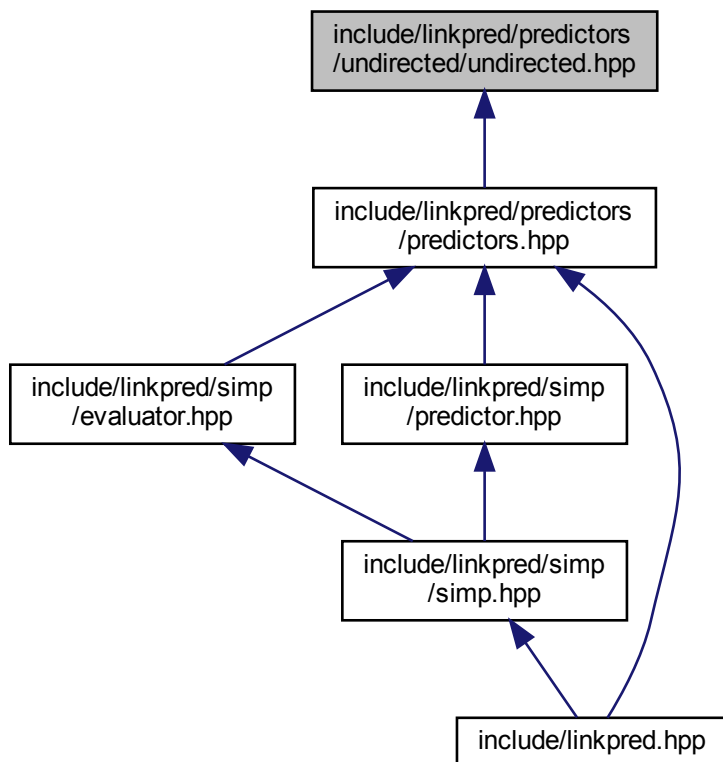

### 10.89.1 Detailed Description

Includes the headers of link predictors for undirected networks.

## 10.90 include/linkpred/predictors/undirected/unedpredictor.hpp File Reference

Contains the implementation of a link prediction algorithm based on the degrees of neighbors.

```

#include <linkpred/predictors/undirected/ulpredictor.hpp>
#include "linkpred/utils/log.hpp"
#include <memory>
#include <cmath>

```

```
#include <limits>
```

Include dependency graph for unedpredictor.hpp:

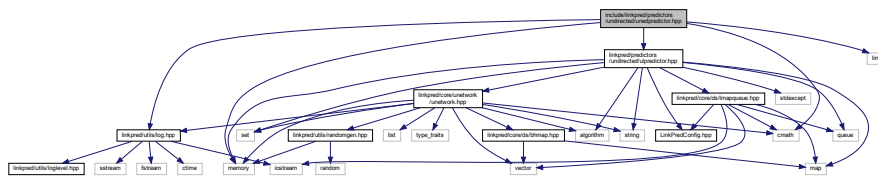

This graph shows which files directly or indirectly include this file:

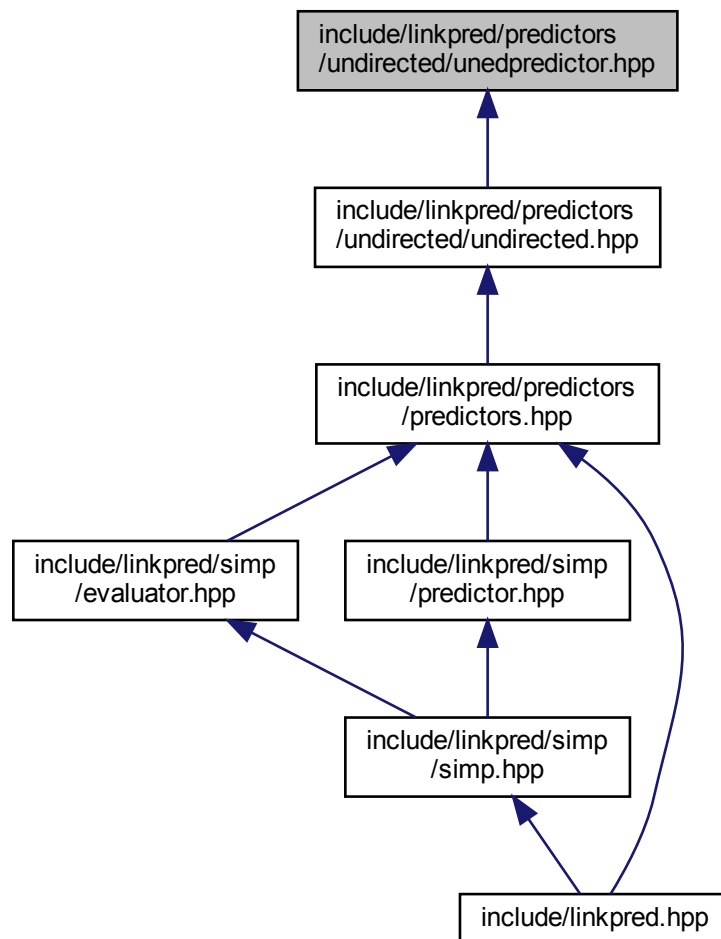

## Classes

- class [LinkPred::UNEDPredictor< Network, EdgeRndIt, ScoreRndIt, EdgeRndOutIt >](#)

*A neighbors degree link predictor.*



This graph shows which files directly or indirectly include this file:

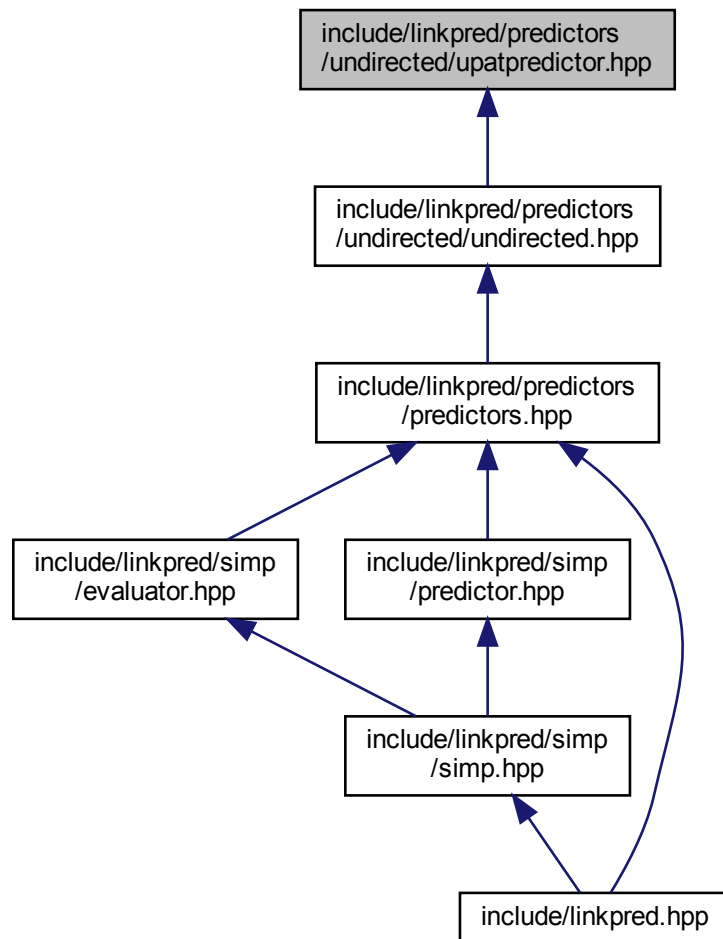

## Classes

- class [LinkPred::UPATPredictor< Network, EdgeRndIt, ScoreRndIt, EdgeRndOutIt >](#)  
A preferential attachment link predictor.

## Namespaces

- [LinkPred](#)  
Main namespace.

### 10.91.1 Detailed Description

Contains the implementation of a preferential attachment link predictor.



## Classes

- class [LinkPred::UPSTPredictor< Network, EdgeRndIt, ScoreRndIt, EdgeRndOutIt >](#)

A link predictor that prestores edge scores. This allows to seemingly integrate results from external link prediction algorithms to [LinkPred](#) (for example, users may implement their own link prediction algorithm and then use this link predictor to use compare their results to algorithms available in [LinkPred](#)).

## Namespaces

- [LinkPred](#)

Main namespace.

### 10.92.1 Detailed Description

Contains the implementation of a link predictor that prestores the scores of edges.

## 10.93 include/linkpred/predictors/undirected/uralpredictor.hpp File Reference

Contains the implementation of a resource allocation link predictor.

```
#include <linkpred/predictors/undirected/ulpredictor.hpp>
```

```
#include <memory>
```

Include dependency graph for uralpredictor.hpp:

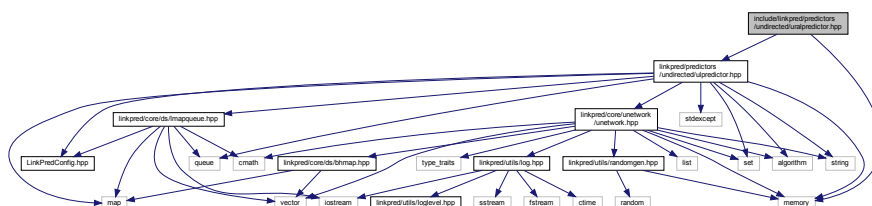

This graph shows which files directly or indirectly include this file:

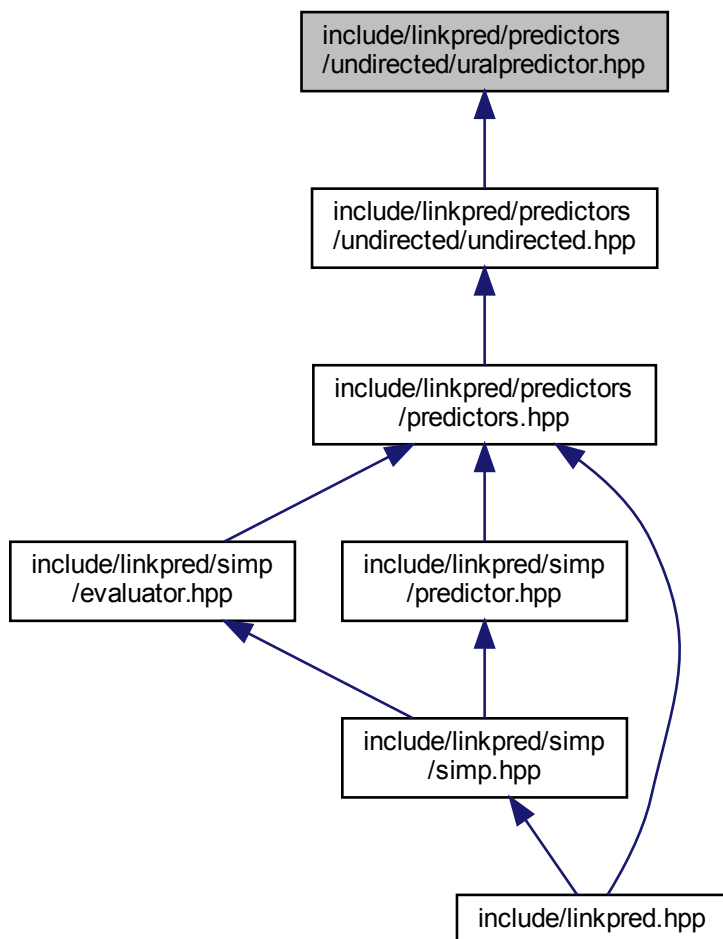

## Classes

- class [LinkPred::URALPredictor< Network, EdgeRndIt, ScoreRndIt, EdgeRndOutIt >](#)  
A resource allocation link predictor.

## Namespaces

- [LinkPred](#)  
Main namespace.

### 10.93.1 Detailed Description

Contains the implementation of a resource allocation link predictor.



## 10.94 include/linkpred/predictors/undirected/urndpredictor.hpp File Reference

Contains the implementation of a random link predictor.

```
#include <linkpred/predictors/undirected/ulpredictor.hpp>
#include "linkpred/utils/randomgen.hpp"
#include <memory>
```

Include dependency graph for urndpredictor.hpp:

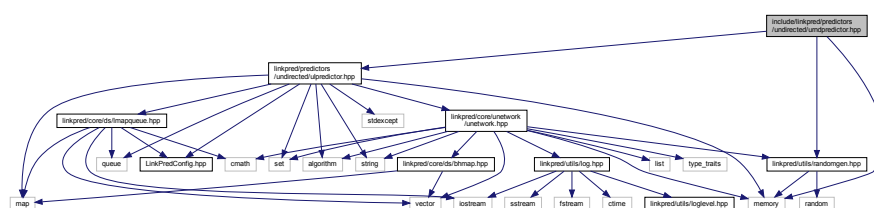

This graph shows which files directly or indirectly include this file:

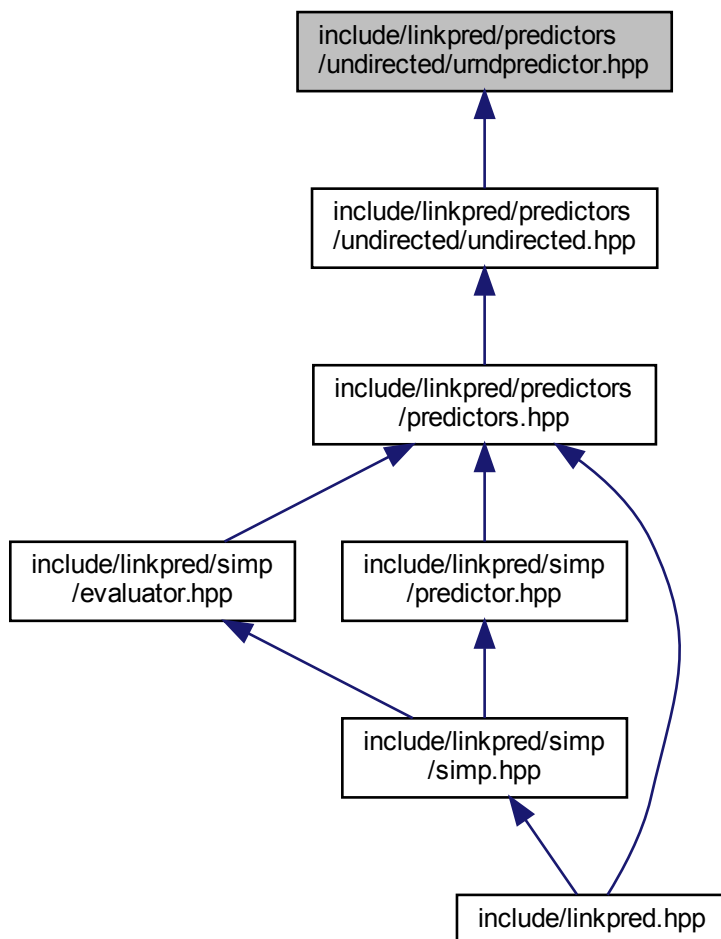

## Classes

- class [LinkPred::URNDPredictor< Network, EdgeRndIt, ScoreRndIt, EdgeRndOutIt >](#)  
*A random link predictor.*

## Namespaces

- [LinkPred](#)  
*Main namespace.*

### 10.94.1 Detailed Description

Contains the implementation of a random link predictor.

## 10.95 include/linkpred/predictors/undirected/usaipredictor.hpp File Reference

Contains the implementation of a Salton index link predictor.

```
#include <linkpred/predictors/undirected/ulpredictor.hpp>
```

```
#include <memory>
```

Include dependency graph for usaipredictor.hpp:

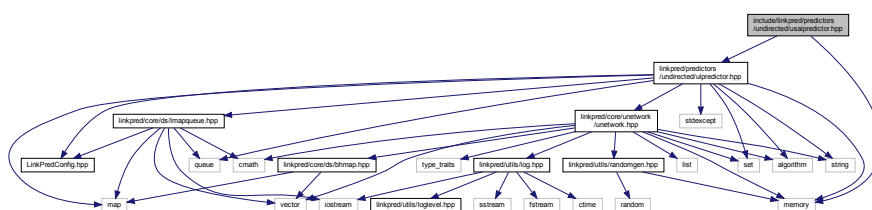

This graph shows which files directly or indirectly include this file:

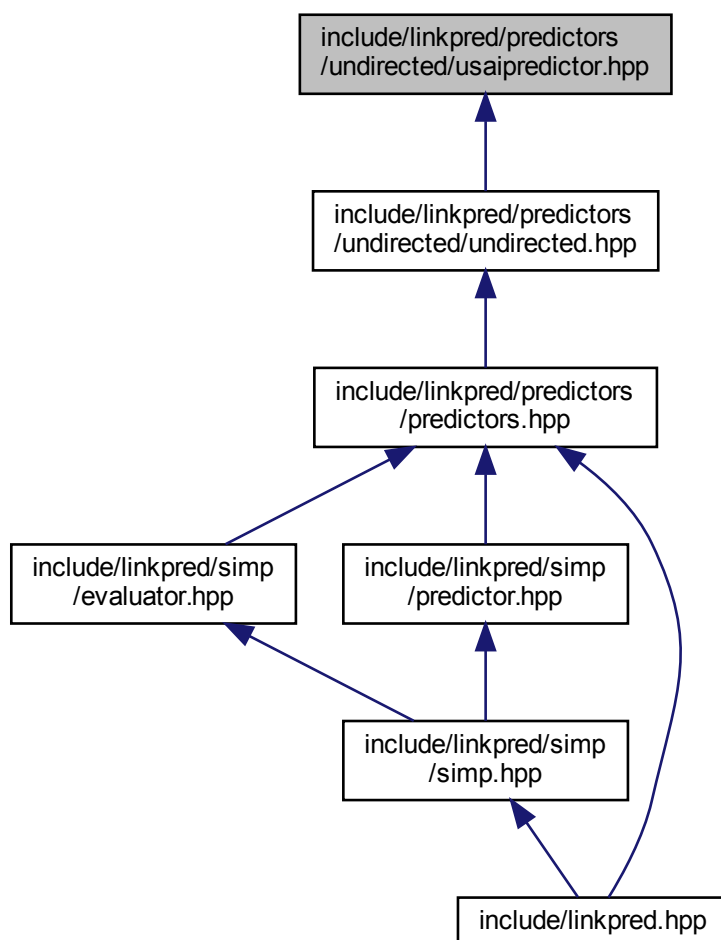



This graph shows which files directly or indirectly include this file:

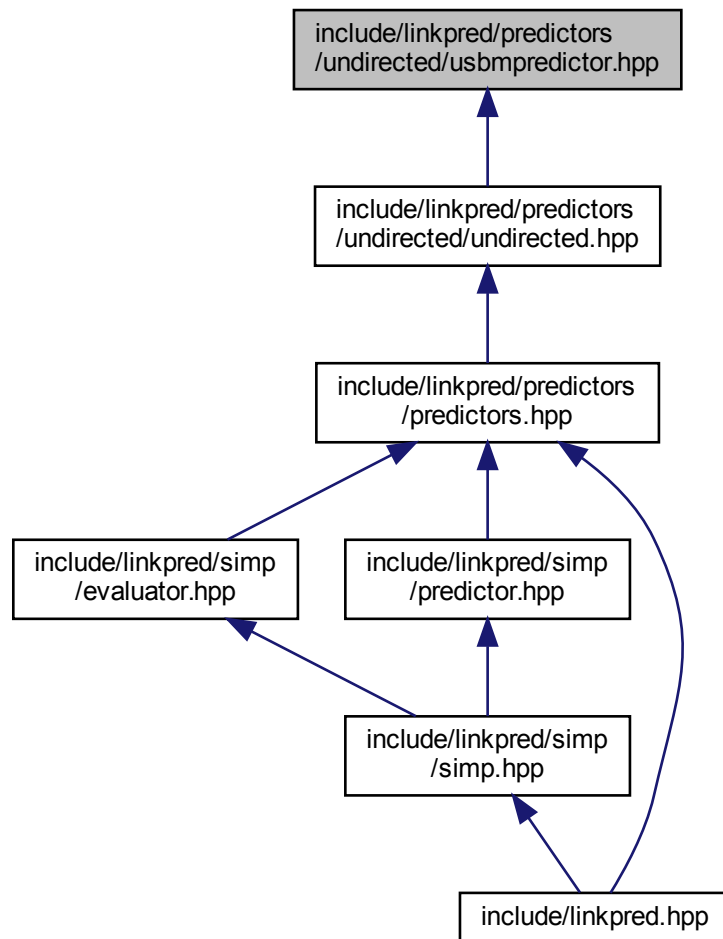

## Classes

- class [LinkPred::USBMPredictor< Network, EdgeRndIt, ScoreRndIt, EdgeRndOutIt >](#)  
*The stochastic block model link predictor.*

## Namespaces

- [LinkPred](#)  
*Main namespace.*

### 10.96.1 Detailed Description

Contains the implementation of the stochastic block model link predictor.



This graph shows which files directly or indirectly include this file:

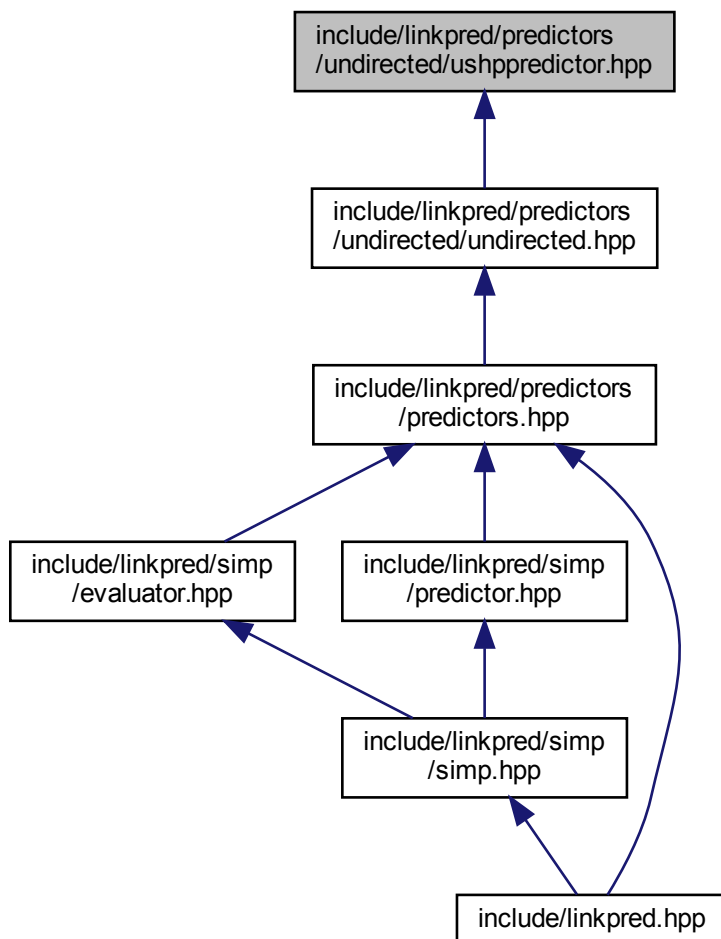

## Classes

- class [LinkPred::USHPPredictor< Network, EdgeRndIt, ScoreRndIt, EdgeRndOutIt >](#)  
*A shortest path link predictor link predictor.*

## Namespaces

- [LinkPred](#)  
*Main namespace.*

### 10.97.1 Detailed Description

Contains the implementation of a shortest path link predictor.







This graph shows which files directly or indirectly include this file:

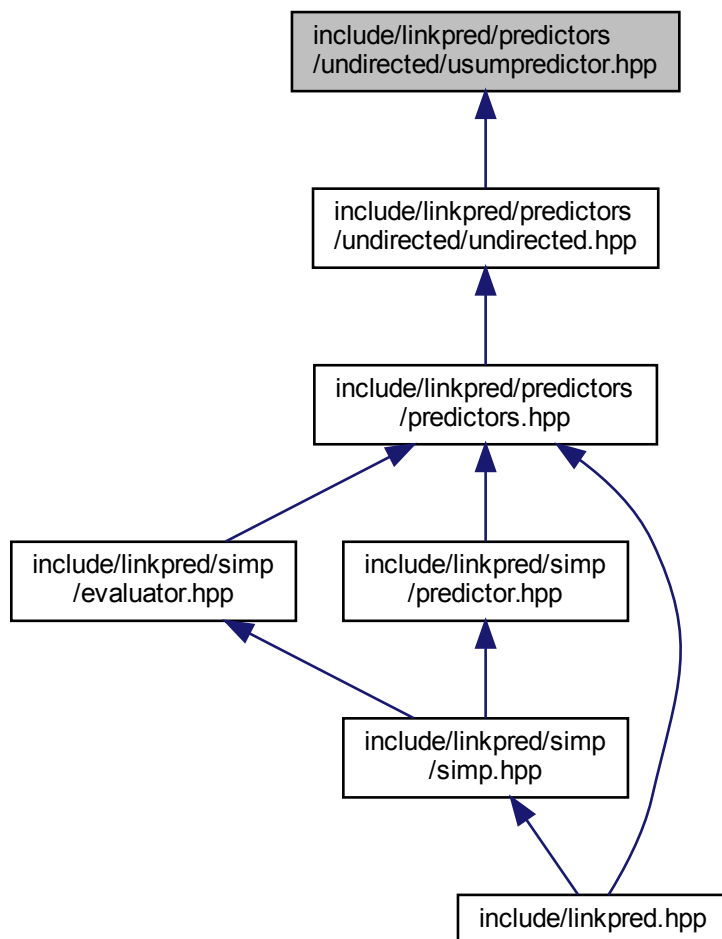

## Classes

- class [LinkPred::USUMPredictor< Network, EdgeRndIt, ScoreRndIt, EdgeRndOutIt >](#)  
A sum-of-degrees link predictor.

## Namespaces

- [LinkPred](#)  
Main namespace.

### 10.99.1 Detailed Description

Contains the implementation of a sum-of-degrees link predictor.

## 10.100 include/linkpred/simp/edgescore.hpp File Reference

Contains the definition of a structure to store the score of an edge.

```
#include <string>
```

Include dependency graph for edgescore.hpp:

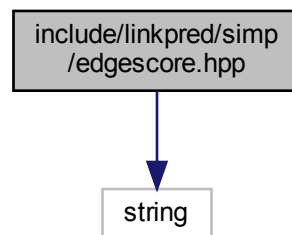

This graph shows which files directly or indirectly include this file:

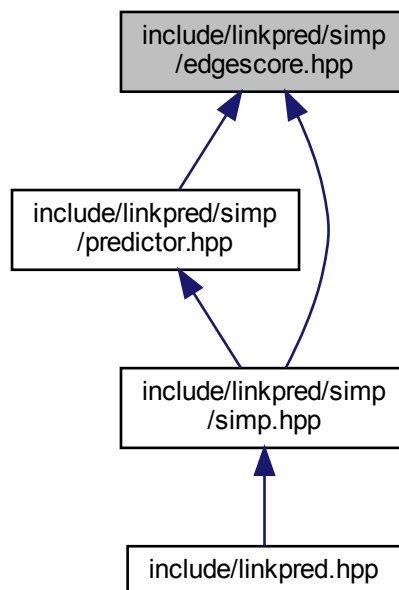

### Classes

- struct [LinkPred::Simp::EdgeScore](#)  
A structure to store the score of an edge.
- struct [LinkPred::Simp::EdgeScoreByID](#)  
A structure to store the score of an edge. The node IDs are used instead of labels.

## Namespaces

- [LinkPred](#)

*Main namespace.*

- [LinkPred::Simp](#)

*Simplified interface. Contains a simplified interface for [LinkPred](#) that includes the essential functionalities.*

### 10.100.1 Detailed Description

Contains the definition of a structure to store the score of an edge.

### 10.101 `include/linkpred/simp/evaluator.hpp` File Reference

Contains the definition of a class that simplifies the evaluation of link prediction algorithms.

```
#include "LinkPredConfig.hpp"
#include "linkpred/simp/perfres.hpp"
#include "linkpred/predictors/predictors.hpp"
#include "linkpred/perf/perf.hpp"
#include <memory>
#include <vector>
#include <map>
#include <set>
```

Include dependency graph for `evaluator.hpp`:

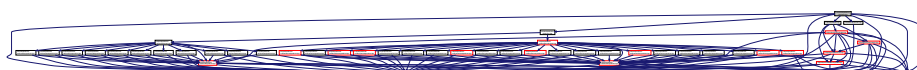

This graph shows which files directly or indirectly include this file:

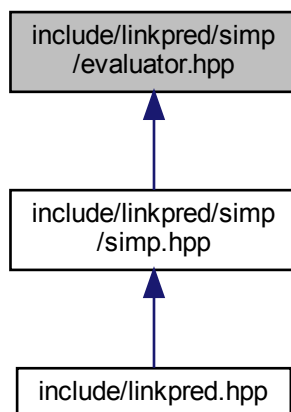

## Classes

- class [LinkPred::Simp::Evaluator](#)  
*A class that simplifies the evaluation of link prediction algorithms.*
- struct [LinkPred::Simp::Evaluator::Factory::ECLParams](#)  
*Parameters of ECL.*
- struct [LinkPred::Simp::Evaluator::Factory::ESMParams](#)  
*Parameters of ESM.*
- struct [LinkPred::Simp::Evaluator::Factory::FBMParams](#)  
*Parameters of FBM.*
- struct [LinkPred::Simp::Evaluator::Factory::HRGParams](#)  
*Parameters of HRG.*
- struct [LinkPred::Simp::Evaluator::Factory::HYPPParams](#)  
*Parameters of HYP.*
- struct [LinkPred::Simp::Evaluator::Factory::KABParams](#)  
*Parameters of KAB.*
- struct [LinkPred::Simp::Evaluator::Factory::LCPParams](#)  
*Parameters of LCP.*
- struct [LinkPred::Simp::Evaluator::Factory::PSTParams](#)  
*Parameters of PST.*
- struct [LinkPred::Simp::Evaluator::Factory::RNDParams](#)  
*Parameters of RND.*
- struct [LinkPred::Simp::Evaluator::Factory::SBMParams](#)  
*Parameters of SBM.*
- struct [LinkPred::Simp::Evaluator::Factory::SHPPParams](#)  
*Parameters of SHP.*

## Namespaces

- [LinkPred](#)  
*Main namespace.*
- [LinkPred::Simp](#)  
*Simplified interface. Contains a simplified interface for [LinkPred](#) that includes the essential functionalities.*

### 10.101.1 Detailed Description

Contains the definition of a class that simplifies the evaluation of link prediction algorithms.

## 10.102 include/linkpred/simp/perfres.hpp File Reference

Contains the definition of a structure to store performance results.

```
#include <string>
```

Include dependency graph for perfres.hpp:

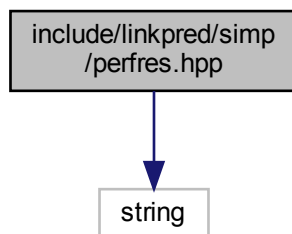

This graph shows which files directly or indirectly include this file:

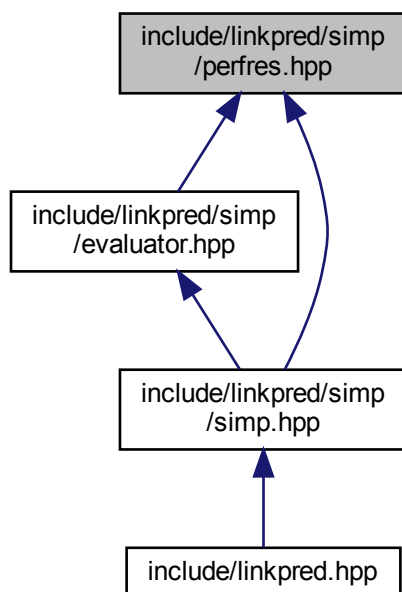

## Classes

- struct [LinkPred::Simp::PerfRes](#)

*A structure to store performance results.*

## Namespaces

- [LinkPred](#)  
*Main namespace.*
- [LinkPred::Simp](#)  
*Simplified interface. Contains a simplified interface for [LinkPred](#) that includes the essential functionalities.*

### 10.102.1 Detailed Description

Contains the definition of a structure to store performance results.

## 10.103 include/linkpred/simp/predictor.hpp File Reference

Contains the definition of a class that simplifies the use of link prediction algorithms.

```
#include "LinkPredConfig.hpp"
#include "linkpred/simp/edgescore.hpp"
#include "linkpred/predictors/predictors.hpp"
#include "linkpred/graphalg/encoders/encoders.hpp"
#include "linkpred/ml/classifiers/classifiers.hpp"
#include "linkpred/ml/simmeasures/simmeasures.hpp"
```

Include dependency graph for predictor.hpp:

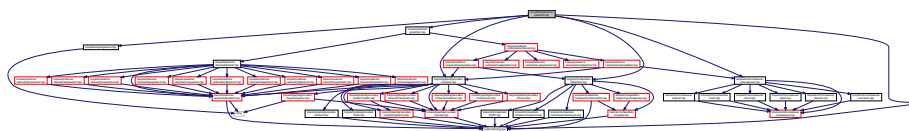

This graph shows which files directly or indirectly include this file:

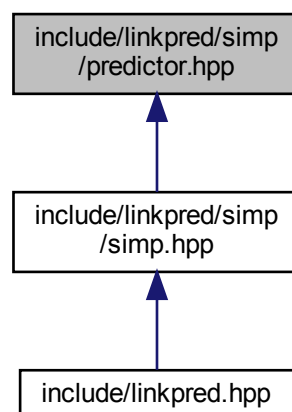

## Classes

- class [LinkPred::Simp::Predictor](#)

*A class that simplifies the use of link prediction algorithms.*

## Namespaces

- [LinkPred](#)

*Main namespace.*

- [LinkPred::Simp](#)

*Simplified interface. Contains a simplified interface for [LinkPred](#) that includes the essential functionalities.*

### 10.103.1 Detailed Description

Contains the definition of a class that simplifies the use of link prediction algorithms.

### 10.104 `include/linkpred/simp/simp.hpp` File Reference

Includes all headers of the essential interface.

```
#include "edgescore.hpp"
#include "predictor.hpp"
#include "perfres.hpp"
#include "evaluator.hpp"
Include dependency graph for simp.hpp:
```

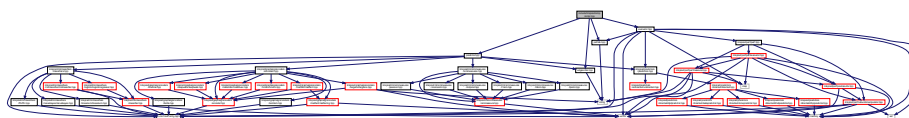

This graph shows which files directly or indirectly include this file:

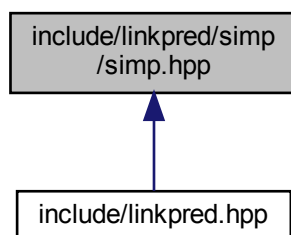



## Namespaces

- [LinkPred](#)  
*Main namespace.*
- [LinkPred::Simp](#)  
*Simplified interface. Contains a simplified interface for [LinkPred](#) that includes the essential functionalities.*

### 10.104.1 Detailed Description

Includes all headers of the essential interface.

## 10.105 include/linkpred/utils/log.hpp File Reference

Contains the implementation of a log class.

```
#include "linkpred/utils/loglevel.hpp"
#include <sstream>
#include <iostream>
#include <fstream>
#include <ctime>
```

Include dependency graph for log.hpp:

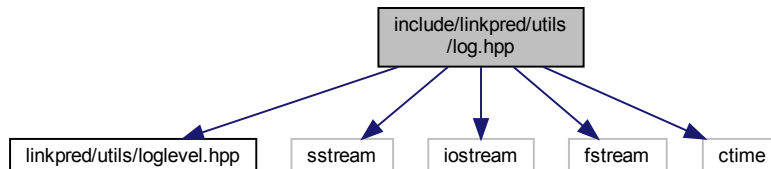

This graph shows which files directly or indirectly include this file:

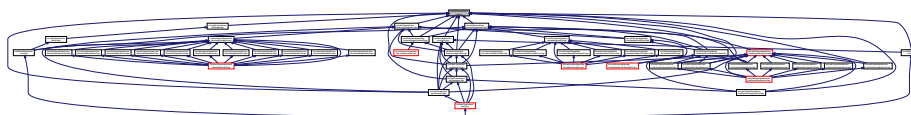

## Classes

- class [LinkPred::Log](#)  
*A log class.*

## Namespaces

- [LinkPred](#)  
*Main namespace.*

## Macros

- `#define logger(level, message)`

### 10.105.1 Detailed Description

Contains the implementation of a log class.

### 10.105.2 Macro Definition Documentation

#### 10.105.2.1 `logger`

```
#define logger(  
    level,  
    message )
```

##### Value:

```
if (level > Log::logLevel) ; \  
else Log(level) << std::string(__FILE__) << " in " << std::string(__FUNCTION__) << ":" << __LINE__ << " : " <<  
    message;
```

Macro for writing to log.

##### Parameters

|                |                                    |
|----------------|------------------------------------|
| <i>level</i>   | The message log level.             |
| <i>message</i> | The text that is added to the log. |

## 10.106 `include/linkpred/utils/loglevel.hpp` File Reference

Contains the definition of log levels.

This graph shows which files directly or indirectly include this file:

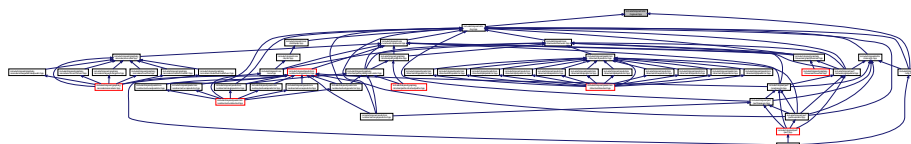

## Namespaces

- [LinkPred](#)  
Main namespace.

## Enumerations

- enum [LinkPred::LogLevel](#) {  
[LinkPred::logError](#), [LinkPred::logWarning](#), [LinkPred::logInfo](#), [LinkPred::logDebug](#),  
[LinkPred::logDebug1](#), [LinkPred::logDebug2](#), [LinkPred::logDebug3](#) }

*Enumeration of log levels.*

### 10.106.1 Detailed Description

Contains the definition of log levels.

## 10.107 include/linkpred/utils/miscutils.hpp File Reference

Contains the implementation of miscellaneous useful methods.

```
#include "LinkPredConfig.hpp"
#include "linkpred/utils/randomgen.hpp"
#include "linkpred/utils/log.hpp"
#include "linkpred/core/ds/lmapqueue.hpp"
#include <string>
#include <cmath>
#include <map>
#include <memory>
#include <set>
#include <queue>
#include <fstream>
#include <iostream>
#include <limits>
#include <algorithm>
#include <iomanip>
```

Include dependency graph for miscutils.hpp:

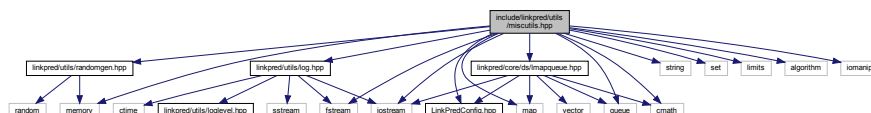

This graph shows which files directly or indirectly include this file:

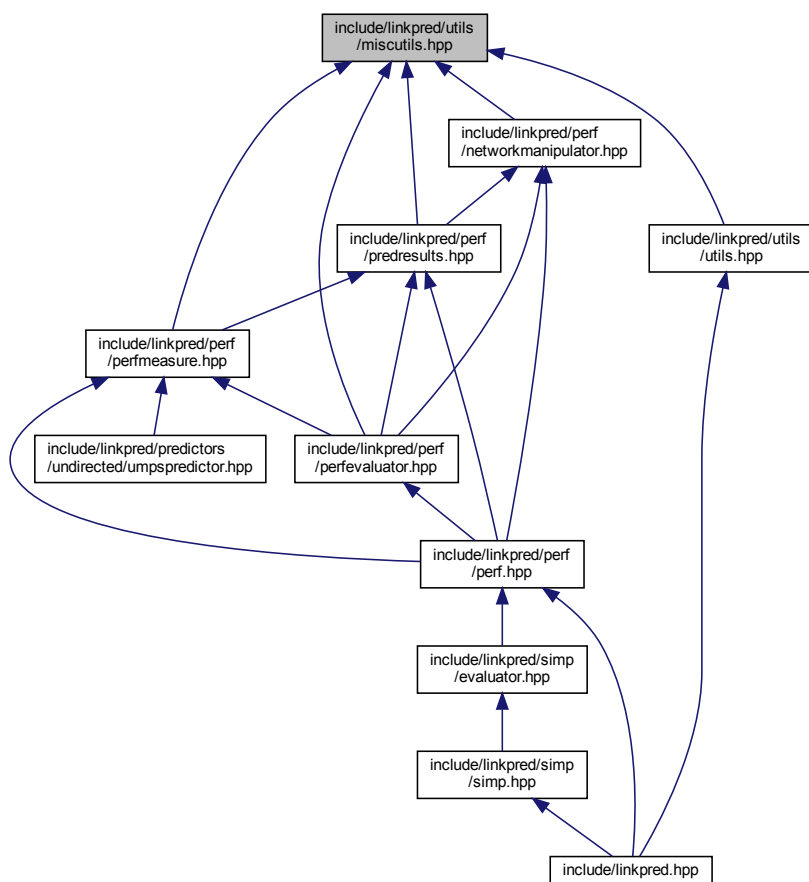

## Classes

- struct [LinkPred::Utils::PairCompRight< FirstT, SecondT, CompareT >](#)  
*Class for comparing pairs based on second elements only.*
- struct [LinkPred::Utils::EdgeScore< Label >](#)  
*A structure to store the score of an edge.*

## Namespaces

- [LinkPred](#)  
*Main namespace.*
- [LinkPred::Utils](#)  
*Some utility functions.*

## Enumerations

- enum [LinkPred::SortOrder](#) { [LinkPred::None](#), [LinkPred::Inc](#), [LinkPred::Dec](#) }  
*Enumeration of different sorting orders.*

## Functions

- `std::string & LinkPred::Utils::ltrim` (`std::string &str`, `const char *spaces=" \t\n\r\f\v"`)
- `std::string & LinkPred::Utils::rtrim` (`std::string &str`, `const char *spaces=" \t\n\r\f\v"`)
- `std::string & LinkPred::Utils::trim` (`std::string &str`, `const char *spaces=" \t\n\r\f\v"`)
- `template<typename T >`  
`void LinkPred::Utils::clear` (`std::queue< T > &q`)
- `template<typename IteratorT >`  
`void LinkPred::Utils::sort` (`IteratorT begin`, `IteratorT end`, `SortOrder sortOrder`)
- `std::vector< std::size_t > LinkPred::Utils::getRndPerm` (`std::size_t n`)
- `std::vector< std::size_t > LinkPred::Utils::getRndPerm` (`std::size_t n`, `long int seed`)
- `std::pair< double, double > LinkPred::Utils::plFit` (`std::vector< std::size_t > const &data`)
- `std::pair< double, double > LinkPred::Utils::plFit` (`std::vector< double > const &data`)
- `template<typename T >`  
`void LinkPred::Utils::print` (`std::vector< T > const &v`, `std::string name`)
- `template<typename U , typename V >`  
`std::pair< V, U > LinkPred::Utils::flip` (`const std::pair< U, V > &p`)
- `template<typename U , typename V >`  
`std::multimap< V, U > LinkPred::Utils::flipMap` (`const std::map< U, V > &map`)
- `template<typename RandomIterator >`  
`std::set< typename std::iterator_traits< RandomIterator >::value_type > LinkPred::Utils::selectRandom` (`RandomIterator begin`, `RandomIterator end`, `std::size_t k`, `long int seed`)
- `template<typename RandomIterator >`  
`void LinkPred::Utils::selectRandomInPlace` (`RandomIterator begin`, `RandomIterator end`, `std::size_t k`, `long int seed`)
- `template<typename T , typename InputIterator , typename InserterIt , typename Compare >`  
`void LinkPred::Utils::selectTopK` (`InputIterator begin`, `InputIterator end`, `InserterIt inserter`, `std::size_t k`)
- `template<typename RandomIterator >`  
`RandomIterator LinkPred::Utils::getRandom` (`RandomIterator begin`, `RandomIterator end`, `long int seed`)
- `template<typename T , typename InputIterator , typename InserterIt >`  
`void LinkPred::Utils::filter` (`InputIterator begin`, `InputIterator end`, `std::set< T > const &excepts`, `InserterIt inserter`)
- `template<typename InputIterator >`  
`void LinkPred::Utils::print` (`InputIterator begin`, `InputIterator end`, `std::string const &title`, `std::ostream &out`)
- `template<typename InputIterator >`  
`void LinkPred::Utils::print` (`InputIterator begin`, `InputIterator end`, `std::string const &title`)
- `template<typename InputIterator , typename Network >`  
`void LinkPred::Utils::printEdges` (`InputIterator begin`, `InputIterator end`, `Network const &net`, `std::string const &title`, `std::ostream &out`)
- `template<typename InputIterator , typename Network >`  
`void LinkPred::Utils::printEdges` (`InputIterator begin`, `InputIterator end`, `Network const &net`, `std::string const &title`)
- `template<typename InputIterator >`  
`double LinkPred::Utils::norm` (`InputIterator begin`, `InputIterator end`)
- `int LinkPred::Utils::int_cast` (`std::size_t source`)
- `template<typename InputIterator >`  
`void LinkPred::Utils::assertNoNaN` (`InputIterator begin`, `InputIterator end`)
- `std::pair< std::size_t, std::size_t > LinkPred::Utils::localRange` (`std::size_t n`, `int nbProcs`, `int procID`)
- `template<typename RandomIterator >`  
`void LinkPred::Utils::shuffle` (`RandomIterator begin`, `RandomIterator end`, `long int seed`)
- `template<typename Label = std::string>`  
`std::vector< std::pair< Label, Label > > LinkPred::Utils::readEdges` (`std::string fileName`, `bool ignoreLoops=true`)
- `template<typename Label = std::string>`  
`std::vector< EdgeScore< Label > > LinkPred::Utils::readEdgeScores` (`std::string fileName`)
- `template<typename Label = std::string>`  
`void LinkPred::Utils::writeEdgeScores` (`std::string fileName`, `std::vector< EdgeScore< Label > > const &esv`)

### 10.107.1 Detailed Description

Contains the implementation of miscellaneous useful methods.

## 10.108 include/linkpred/utils/randomgen.hpp File Reference

Contains the implementation of a random number generator.

```
#include <random>
```

```
#include <memory>
```

Include dependency graph for randomgen.hpp:

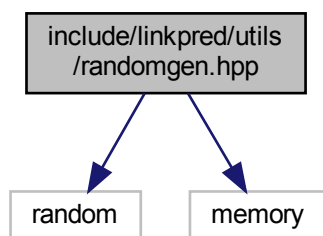

This graph shows which files directly or indirectly include this file:

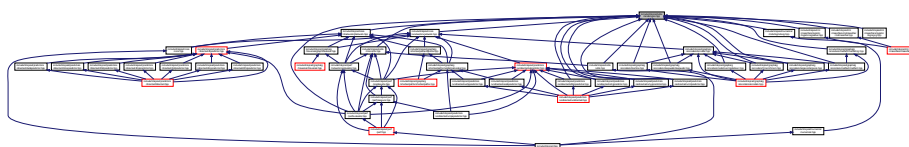

### Classes

- class [LinkPred::RandomGen](#)  
*A random number generator.*

### Namespaces

- [LinkPred](#)  
*Main namespace.*

### 10.108.1 Detailed Description

Contains the implementation of a random number generator.

## 10.109 include/linkpred/utils/utils.hpp File Reference

Includes the headers related to utility classes.

```
#include <linkpred/utils/miscutils.hpp>
#include "linkpred/utils/log.hpp"
#include "linkpred/utils/loglevel.hpp"
#include "linkpred/utils/randomgen.hpp"
Include dependency graph for utils.hpp:
```

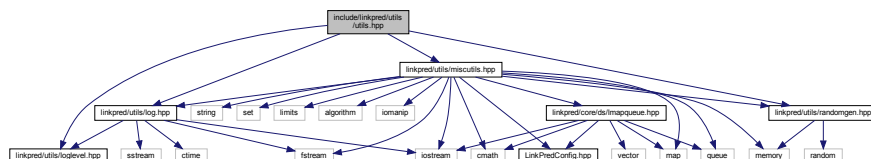

This graph shows which files directly or indirectly include this file:

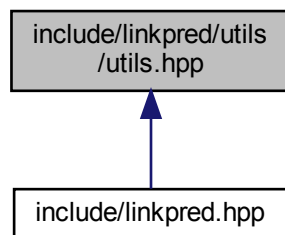

### 10.109.1 Detailed Description

Includes the headers related to utility classes.





# Index

- ~ DESPLDistCalculator
  - LinkPred::DESPLDistCalculator< Network, DistType, NbHopsType >, [126](#)
- ~ ESPLDistCalculator
  - LinkPred::ESPLDistCalculator< Network, DistType, NbHopsType >, [288](#)
- ~ ESPLSimCalculator
  - LinkPred::ESPLSimCalculator< Network, DistType, NbHopsType >, [297](#)
- ~ ASPDistCalculator
  - LinkPred::ASPDistCalculator< Network, DistType, NbHopsType >, [63](#)
- ~ ASPDsimCalculator
  - LinkPred::ASPDsimCalculator< Network, DsimType, NbHopsType >, [70](#)
- ~ BFS
  - LinkPred::BFS< Network, NodeProcessor >, [75](#)
- ~ BHeap
  - LinkPred::BHeap< T, P, ComparatorT, ComparatorP >, [79](#)
- ~ Bhmap
  - LinkPred::Bhmap< K, P, Comparator >, [85](#)
- ~ Classifier
  - LinkPred::Classifier< InRndIt, OutRndIt, ScoreRndIt >, [90](#)
- ~ Collector
  - LinkPred::Collector< Network >, [94](#)
- ~ CosineSim
  - LinkPred::CosineSim, [97](#)
- ~ Counter
  - LinkPred::Counter< Network >, [100](#)
- ~ DADAPredictor
  - LinkPred::DADAPredictor< Network, EdgeRndIt, ScoreRndIt, EdgeRndOutIt >, [104](#)
- ~ DCNEPredictor
  - LinkPred::DCNEPredictor< Network, EdgeRndIt, ScoreRndIt, EdgeRndOutIt >, [110](#)
- ~ DFS
  - LinkPred::DFS< Network, NodeProcessor >, [133](#)
- ~ DHDIPredictor
  - LinkPred::DHDIPredictor< Network, EdgeRndIt, ScoreRndIt, EdgeRndOutIt >, [136](#)
- ~ DHPIPredictor
  - LinkPred::DHPIPredictor< Network, EdgeRndIt, ScoreRndIt, EdgeRndOutIt >, [142](#)
- ~ DJIDPredictor
  - LinkPred::DJIDPredictor< Network, EdgeRndIt, ScoreRndIt, EdgeRndOutIt >, [161](#)
- ~ DLCPPredictor
  - LinkPred::DLCPPredictor< Network, EdgeRndIt, ScoreRndIt, EdgeRndOutIt >, [166](#)
- ~ DLHNPredictor
  - LinkPred::DLHNPredictor< Network, EdgeRndIt, ScoreRndIt, EdgeRndOutIt >, [171](#)
- ~ DLPredictor
  - LinkPred::DLPredictor< NetworkT, EdgeRndItT, ScoreRndItT, EdgeRndOutItT >, [178](#)
- ~ DNetwork
  - LinkPred::DNetwork< LabelT, NodeIDT, EdgeT >, [188](#)
- ~ DPATPredictor
  - LinkPred::DPATPredictor< Network, EdgeRndIt, ScoreRndIt, EdgeRndOutIt >, [218](#)
- ~ DPSTPredictor
  - LinkPred::DPSTPredictor< Network, EdgeRndIt, ScoreRndIt, EdgeRndOutIt >, [223](#)
- ~ DSAIPredictor
  - LinkPred::DSAIPredictor< Network, EdgeRndIt, ScoreRndIt, EdgeRndOutIt >, [228](#)
- ~ DSOIPredictor
  - LinkPred::DSOIPredictor< Network, EdgeRndIt, ScoreRndIt, EdgeRndOutIt >, [234](#)
- ~ DeepWalk
  - LinkPred::DeepWalk< Network >, [115](#)
- ~ Dijkstra
  - LinkPred::Dijkstra< Network, DistType, NbHopsType >, [149](#)
- ~ DotProd
  - LinkPred::DotProd, [214](#)
- ~ ESPDistCalculator
  - LinkPred::ESPDistCalculator< Network, DistType, NbHopsType >, [267](#)
- ~ ESPDsimCalculator
  - LinkPred::ESPDsimCalculator< Network, DsimType, NbHopsType >, [275](#)
- ~ ESPIndSimCalculator
  - LinkPred::ESPIndSimCalculator< Network, DistType, NbHopsType >, [282](#)
- ~ ESPSimCalculator
  - LinkPred::ESPSimCalculator< Network, DistType, NbHopsType >, [307](#)
- ~ EdgeMap
  - LinkPred::DNetwork< LabelT, NodeIDT, EdgeT >::EdgeMap< ValueType >, [246](#)
  - LinkPred::UNetwork< LabelT, NodeIDT, EdgeT >::EdgeMap< ValueType >, [240](#)
- ~ Encoder
  - LinkPred::Encoder< Network >, [257](#)

- ~Evaluator
  - LinkPred::Simp::Evaluator, [311](#)
- ~FastSig
  - LinkPred::FastSig< T >, [322](#)
- ~GCurve
  - LinkPred::GCurve< PredResultsT >, [328](#)
- ~GFMatrix
  - LinkPred::GFMatrix, [334](#)
- ~GraphTraversal
  - LinkPred::GraphTraversal< Network, NodeProcessor >, [349](#)
- ~HMSM
  - LinkPred::HMSM< Network >, [353](#)
- ~L1Sim
  - LinkPred::L1Sim, [363](#)
- ~L2Sim
  - LinkPred::L2Sim, [366](#)
- ~LINE
  - LinkPred::LINE< Network >, [379](#)
- ~LMapQueue
  - LinkPred::LMapQueue< K, P, KComparator, PComparator >, [386](#)
- ~LPSim
  - LinkPred::LPSim, [414](#)
- ~LargeVis
  - LinkPred::LargeVis< Network >, [370](#)
- ~Log
  - LinkPred::Log, [394](#)
- ~LogMDSCG
  - LinkPred::LogMDSCG, [403](#)
- ~LogRegCG
  - LinkPred::LogRegCG< InRndIt, OutRndIt >, [409](#)
- ~LogisticRegresser
  - LinkPred::LogisticRegresser< InRndIt, OutRndIt, ScoreRndIt >, [398](#)
- ~MDS
  - LinkPred::MDS, [429](#)
- ~MatFact
  - LinkPred::MatFact< Network >, [419](#)
- ~MatFactCG
  - LinkPred::MatFactCG, [425](#)
- ~NetDistCalculator
  - LinkPred::NetDistCalculator< Network, DistType, NbHopsType >, [435](#)
- ~NetIndSimlCalculator
  - LinkPred::NetIndSimlCalculator< Network, DistType, NbHopsType >, [440](#)
- ~NetSimlCalculator
  - LinkPred::NetSimlCalculator< Network, DistType, NbHopsType >, [446](#)
- ~NetworkManipulator
  - LinkPred::NetworkManipulator< Network >, [453](#)
- ~Node2Vec
  - LinkPred::Node2Vec< Network >, [467](#)
- ~NodeMap
  - LinkPred::DNetwork< LabelT, NodeIDT, EdgeT >::NodeMap< ValueType >, [501](#)
  - LinkPred::UNetwork< LabelT, NodeIDT, EdgeT >::NodeMap< ValueType >, [496](#)
- ~NodeSMap
  - LinkPred::DNetwork< LabelT, NodeIDT, EdgeT >::NodeSMap< ValueType >, [507](#)
  - LinkPred::UNetwork< LabelT, NodeIDT, EdgeT >::NodeSMap< ValueType >, [513](#)
- ~PEFactory
  - LinkPred::PEFactory< Network, LPredictorT, TestDataT, PerfMeasureT >, [540](#)
- ~PR
  - LinkPred::PR< PredResultsT >, [572](#)
- ~Pearson
  - LinkPred::Pearson, [538](#)
- ~PerfCurve
  - LinkPred::PerfCurve< PredResultsT >, [544](#)
- ~PerfEvalExp
  - LinkPred::PerfEvalExp< Network, TestDataT, LPredictorT, PredResultsT, PerfMeasureT >, [551](#)
- ~PerfEvaluator
  - LinkPred::PerfEvaluator< TestDataT, LPredictorT, PredResultsT, PerfMeasureT >, [557](#)
- ~PerfMeasure
  - LinkPred::PerfMeasure< PredResultsT >, [564](#)
- ~PredResults
  - LinkPred::PredResults< TestDataT, LPredictorT, ScoresContainerT >, [616](#)
- ~Predictor
  - LinkPred::Simp::Predictor, [581](#)
- ~ROC
  - LinkPred::ROC< PredResultsT >, [670](#)
- ~RandomGen
  - LinkPred::RandomGen, [628](#)
- ~RndClassifier
  - LinkPred::RndClassifier< InRndIt, OutRndIt, ScoreRndIt >, [635](#)
- ~SimMeasure
  - LinkPred::SimMeasure, [691](#)
- ~TPR
  - LinkPred::TPR< PredResultsT >, [741](#)
- ~TestData
  - LinkPred::TestData< Network, EdgeContT >, [697](#)
- ~TestEdgeGen
  - LinkPred::TestEdgeGen< Network, EdgeContT >, [706](#)
- ~UADAPredictor
  - LinkPred::UADAPredictor< Network, EdgeRndIt, ScoreRndIt, EdgeRndOutIt >, [748](#)
- ~UCNEPredictor
  - LinkPred::UCNEPredictor< Network, EdgeRndIt, ScoreRndIt, EdgeRndOutIt >, [753](#)
- ~UCRAPredictor
  - LinkPred::UCRAPredictor< Network, EdgeRndIt, ScoreRndIt, EdgeRndOutIt >, [759](#)
- ~UCSTPredictor
  - LinkPred::UCSTPredictor< Network, EdgeRndIt, ScoreRndIt, EdgeRndOutIt >, [765](#)

- ~UECLPredictor
  - LinkPred::UECLPredictor< Network, EdgeRndIt, ScoreRndIt, EdgeRndOutIt >, [771](#)
- ~UESMPredictor
  - LinkPred::UESMPredictor< Network, EdgeRndIt, ScoreRndIt, EdgeRndOutIt >, [778](#)
- ~UFBMPredictor
  - LinkPred::UFBMPredictor< Network, EdgeRndIt, ScoreRndIt, EdgeRndOutIt >, [783](#)
- ~UHDIPredictor
  - LinkPred::UHDIPredictor< Network, EdgeRndIt, ScoreRndIt, EdgeRndOutIt >, [789](#)
- ~UHPIPredictor
  - LinkPred::UHPIPredictor< Network, EdgeRndIt, ScoreRndIt, EdgeRndOutIt >, [794](#)
- ~UHRGPredictor
  - LinkPred::UHRGPredictor< Network, EdgeRndIt, ScoreRndIt, EdgeRndOutIt >, [799](#)
- ~UHYPPredictor
  - LinkPred::UHYPPredictor< Network, EdgeRndIt, ScoreRndIt, EdgeRndOutIt >, [805](#)
- ~UJIDPredictor
  - LinkPred::UJIDPredictor< Network, EdgeRndIt, ScoreRndIt, EdgeRndOutIt >, [814](#)
- ~UKABPredictor
  - LinkPred::UKABPredictor< Network, EdgeRndIt, ScoreRndIt, EdgeRndOutIt >, [820](#)
- ~ULCPPredictor
  - LinkPred::ULCPPredictor< Network, EdgeRndIt, ScoreRndIt, EdgeRndOutIt >, [826](#)
- ~ULHNPredictor
  - LinkPred::ULHNPredictor< Network, EdgeRndIt, ScoreRndIt, EdgeRndOutIt >, [832](#)
- ~ULPredictor
  - LinkPred::ULPredictor< NetworkT, EdgeRndItT, ScoreRndItT, EdgeRndOutItT >, [838](#)
- ~UMPSPredictor
  - LinkPred::UMPSPredictor< Network, EdgeRndIt, ScoreRndIt, EdgeRndOutIt >, [848](#)
- ~UNEDPredictor
  - LinkPred::UNEDPredictor< Network, EdgeRndIt, ScoreRndIt, EdgeRndOutIt >, [864](#)
- ~UNetwork
  - LinkPred::UNetwork< LabelT, NodeIDT, EdgeT >, [872](#)
- ~UPATPredictor
  - LinkPred::UPATPredictor< Network, EdgeRndIt, ScoreRndIt, EdgeRndOutIt >, [897](#)
- ~UPSTPredictor
  - LinkPred::UPSTPredictor< Network, EdgeRndIt, ScoreRndIt, EdgeRndOutIt >, [903](#)
- ~URALPredictor
  - LinkPred::URALPredictor< Network, EdgeRndIt, ScoreRndIt, EdgeRndOutIt >, [908](#)
- ~URNDPredictor
  - LinkPred::URNDPredictor< Network, EdgeRndIt, ScoreRndIt, EdgeRndOutIt >, [913](#)
- ~USAIPredictor
  - LinkPred::USAIPredictor< Network, EdgeRndIt, ScoreRndIt, EdgeRndOutIt >, [919](#)
- ~USBMPredictor
  - LinkPred::USBMPredictor< Network, EdgeRndIt, ScoreRndIt, EdgeRndOutIt >, [924](#)
- ~USHPPredictor
  - LinkPred::USHPPredictor< Network, EdgeRndIt, ScoreRndIt, EdgeRndOutIt >, [930](#)
- ~USOIPredictor
  - LinkPred::USOIPredictor< Network, EdgeRndIt, ScoreRndIt, EdgeRndOutIt >, [938](#)
- ~USUMPredictor
  - LinkPred::USUMPredictor< Network, EdgeRndIt, ScoreRndIt, EdgeRndOutIt >, [943](#)
- ~Vec
  - LinkPred::Vec, [950](#)
- acc
  - perfmeasure.hpp, [1051](#)
- addADA
  - LinkPred::Simp::Evaluator, [311](#)
- addCNE
  - LinkPred::Simp::Evaluator, [312](#)
- addCRA
  - LinkPred::Simp::Evaluator, [312](#)
- addECL
  - LinkPred::Simp::Evaluator, [312](#)
- addEdge
  - LinkPred::DNetwork< LabelT, NodeIDT, EdgeT >, [188](#)
  - LinkPred::UNetwork< LabelT, NodeIDT, EdgeT >, [872](#)
- addESM
  - LinkPred::Simp::Evaluator, [313](#)
- addFBM
  - LinkPred::Simp::Evaluator, [313](#)
- addHDI
  - LinkPred::Simp::Evaluator, [314](#)
- addHPI
  - LinkPred::Simp::Evaluator, [314](#)
- addHRG
  - LinkPred::Simp::Evaluator, [314](#)
- addHYP
  - LinkPred::Simp::Evaluator, [315](#)
- addJID
  - LinkPred::Simp::Evaluator, [315](#)
- addKAB
  - LinkPred::Simp::Evaluator, [315](#)
- addLCP
  - LinkPred::Simp::Evaluator, [316](#)
- addLHN
  - LinkPred::Simp::Evaluator, [316](#)
- addNode
  - LinkPred::DNetwork< LabelT, NodeIDT, EdgeT >, [189](#)
  - LinkPred::UNetwork< LabelT, NodeIDT, EdgeT >, [873](#)
- addPAT
  - LinkPred::Simp::Evaluator, [316](#)

- addPerfMeasure
  - LinkPred::PerfEvaluator< TestDataT, LPredictorT, PredResultsT, PerfMeasureT >, 557
- addPR
  - LinkPred::Simp::Evaluator, 316
- addPredictor
  - LinkPred::PerfEvaluator< TestDataT, LPredictorT, PredResultsT, PerfMeasureT >, 557
- addPST
  - LinkPred::Simp::Evaluator, 317
- addRAL
  - LinkPred::Simp::Evaluator, 317
- addRND
  - LinkPred::Simp::Evaluator, 317
- addROC
  - LinkPred::Simp::Evaluator, 318
- addSAI
  - LinkPred::Simp::Evaluator, 318
- addSBM
  - LinkPred::Simp::Evaluator, 318
- addSHP
  - LinkPred::Simp::Evaluator, 318
- addSOI
  - LinkPred::Simp::Evaluator, 319
- addTPR
  - LinkPred::Simp::Evaluator, 319
- amax
  - LinkPred::Vec, 950
- amin
  - LinkPred::Vec, 951
- ASPDistCalculator
  - LinkPred::ASPDistCalculator< Network, DistType, NbHopsType >, 62, 63
- ASPDsimCalculator
  - LinkPred::ASPDsimCalculator< Network, DsimType, NbHopsType >, 69, 70
- assemble
  - LinkPred::DNetwork< LabelT, NodeIDT, EdgeT >, 189
  - LinkPred::UNetwork< LabelT, NodeIDT, EdgeT >, 873
- assertNoNaN
  - LinkPred::Utils, 48
- at
  - LinkPred::DNetwork< LabelT, NodeIDT, EdgeT >::EdgeMap< ValueType >, 247
  - LinkPred::DNetwork< LabelT, NodeIDT, EdgeT >::NodeMap< ValueType >, 502
  - LinkPred::DNetwork< LabelT, NodeIDT, EdgeT >::NodeSMap< ValueType >, 507
  - LinkPred::LMapQueue< K, P, KComparator, PComparator >, 387
  - LinkPred::UNetwork< LabelT, NodeIDT, EdgeT >::EdgeMap< ValueType >, 240
  - LinkPred::UNetwork< LabelT, NodeIDT, EdgeT >::NodeMap< ValueType >, 496
  - LinkPred::UNetwork< LabelT, NodeIDT, EdgeT >::NodeSMap< ValueType >, 513
- axpy
  - LinkPred::Vec, 951
- begin
  - LinkPred::DNetwork< LabelT, NodeIDT, EdgeT >::EdgeMap< ValueType >, 247
  - LinkPred::DNetwork< LabelT, NodeIDT, EdgeT >::NodeMap< ValueType >, 502
  - LinkPred::DNetwork< LabelT, NodeIDT, EdgeT >::NodeSMap< ValueType >, 507
  - LinkPred::LMapQueue< K, P, KComparator, PComparator >, 387, 388
  - LinkPred::UNetwork< LabelT, NodeIDT, EdgeT >::EdgeMap< ValueType >, 241
  - LinkPred::UNetwork< LabelT, NodeIDT, EdgeT >::NodeMap< ValueType >, 497
  - LinkPred::UNetwork< LabelT, NodeIDT, EdgeT >::NodeSMap< ValueType >, 513
- BFS
  - LinkPred::BFS< Network, NodeProcessor >, 74
- BHeap
  - LinkPred::BHeap< T, P, ComparatorT, ComparatorP >, 78
- Bhmap
  - LinkPred::Bhmap< K, P, Comparator >, 84, 85
- bindings/Java/include/LinkPredJavaConfig.hpp, 971
- bindings/Python/include/LinkPredPythonConfig.hpp, 971
- CacheLevel
  - LinkPred, 39
- cbegin
  - LinkPred::DNetwork< LabelT, NodeIDT, EdgeT >::EdgeMap< ValueType >, 247
  - LinkPred::DNetwork< LabelT, NodeIDT, EdgeT >::NodeMap< ValueType >, 502
  - LinkPred::DNetwork< LabelT, NodeIDT, EdgeT >::NodeSMap< ValueType >, 508
  - LinkPred::LMapQueue< K, P, KComparator, PComparator >, 388
  - LinkPred::UNetwork< LabelT, NodeIDT, EdgeT >::EdgeMap< ValueType >, 241
  - LinkPred::UNetwork< LabelT, NodeIDT, EdgeT >::NodeMap< ValueType >, 497
  - LinkPred::UNetwork< LabelT, NodeIDT, EdgeT >::NodeSMap< ValueType >, 513
- cend
  - LinkPred::DNetwork< LabelT, NodeIDT, EdgeT >::EdgeMap< ValueType >, 247
  - LinkPred::DNetwork< LabelT, NodeIDT, EdgeT >::NodeMap< ValueType >, 502
  - LinkPred::DNetwork< LabelT, NodeIDT, EdgeT >::NodeSMap< ValueType >, 508
  - LinkPred::LMapQueue< K, P, KComparator, PComparator >, 388
  - LinkPred::UNetwork< LabelT, NodeIDT, EdgeT >::EdgeMap< ValueType >, 241
  - LinkPred::UNetwork< LabelT, NodeIDT, EdgeT >::NodeMap< ValueType >, 497

- LinkPred::UNetwork< LabelT, NodeIDT, EdgeT >::NodeSMap< ValueType >, [514](#)
- center
  - LinkPred::Vec, [952](#)
- CGMDS
  - LinkPred, [40](#)
- cgMDS
  - LinkPred::MDS, [430](#)
- Classifier
  - LinkPred::Classifier< InRndIt, OutRndIt, ScoreRndIt >, [89](#), [90](#)
- classifierName
  - LinkPred::Simp::Evaluator::Factory::ECLParams, [237](#)
- clear
  - LinkPred::LMapQueue< K, P, KComparator, PComparator >, [388](#)
  - LinkPred::Utils, [49](#)
- CodeMap
  - LinkPred::Encoder< Network >, [255](#)
- CodeMapSP
  - LinkPred::Encoder< Network >, [255](#)
- Collector
  - LinkPred::Collector< Network >, [93](#), [94](#)
- compareEdgeEnd
  - LinkPred::DNetwork< LabelT, NodeIDT, EdgeT >, [189](#)
  - LinkPred::UNetwork< LabelT, NodeIDT, EdgeT >, [873](#)
- compareTop
  - LinkPred::LMapQueue< K, P, KComparator, PComparator >, [388](#)
- compNegScores
  - LinkPred::PredResults< TestDataT, LPredictorT, ScoresContainerT >, [617](#)
- compPosScores
  - LinkPred::PredResults< TestDataT, LPredictorT, ScoresContainerT >, [617](#)
- compTopScores
  - LinkPred::PredResults< TestDataT, LPredictorT, ScoresContainerT >, [617](#)
- contains
  - LinkPred::BHeap< T, P, ComparatorT, ComparatorP >, [79](#)
- Core classes, [23](#)
- CosineSim
  - LinkPred::CosineSim, [96](#), [97](#)
- count
  - LinkPred::LMapQueue< K, P, KComparator, PComparator >, [389](#)
- Counter
  - LinkPred::Counter< Network >, [99](#), [100](#)
- coupleAtOrd
  - LinkPred::DNetwork< LabelT, NodeIDT, EdgeT >, [190](#)
  - LinkPred::UNetwork< LabelT, NodeIDT, EdgeT >, [874](#)
- coupleOrd
- LinkPred::DNetwork< LabelT, NodeIDT, EdgeT >, [190](#)
- LinkPred::UNetwork< LabelT, NodeIDT, EdgeT >, [874](#)
- createEdgeMap
  - LinkPred::DNetwork< LabelT, NodeIDT, EdgeT >, [190](#)
  - LinkPred::UNetwork< LabelT, NodeIDT, EdgeT >, [874](#)
- createEdgeMapSP
  - LinkPred::DNetwork< LabelT, NodeIDT, EdgeT >, [191](#)
  - LinkPred::UNetwork< LabelT, NodeIDT, EdgeT >, [875](#)
- createNodeMap
  - LinkPred::DNetwork< LabelT, NodeIDT, EdgeT >, [191](#)
  - LinkPred::UNetwork< LabelT, NodeIDT, EdgeT >, [875](#)
- createNodeMapSP
  - LinkPred::DNetwork< LabelT, NodeIDT, EdgeT >, [191](#)
  - LinkPred::UNetwork< LabelT, NodeIDT, EdgeT >, [875](#)
- createNodeSMap
  - LinkPred::DNetwork< LabelT, NodeIDT, EdgeT >, [192](#)
  - LinkPred::UNetwork< LabelT, NodeIDT, EdgeT >, [876](#)
- createNodeSMapSP
  - LinkPred::DNetwork< LabelT, NodeIDT, EdgeT >, [192](#)
  - LinkPred::UNetwork< LabelT, NodeIDT, EdgeT >, [876](#)
- createTestData
  - LinkPred::NetworkManipulator< Network >, [453](#), [454](#)
- createTestDataAdd
  - LinkPred::NetworkManipulator< Network >, [455](#)
- createTestDataRem
  - LinkPred::NetworkManipulator< Network >, [456](#)
- createTestDataSeq
  - LinkPred::NetworkManipulator< Network >, [457](#)
- createTestDataSeqInter
  - LinkPred::NetworkManipulator< Network >, [458](#)
- DADAPredictor
  - LinkPred::DADAPredictor< Network, EdgeRndIt, ScoreRndIt, EdgeRndOutIt >, [103](#), [104](#)
- DCNEPredictor
  - LinkPred::DCNEPredictor< Network, EdgeRndIt, ScoreRndIt, EdgeRndOutIt >, [109](#)
- Dec
  - LinkPred, [40](#)
- decrease
  - LinkPred::BHeap< T, P, ComparatorT, ComparatorP >, [79](#)
- DeepWalk
  - LinkPred::DeepWalk< Network >, [114](#), [115](#)

- DefaultLogLevel
  - LinkPred::Log, [395](#)
- DefaultOutputStream
  - LinkPred::Log, [395](#)
- DESPLDistCalculator
  - LinkPred::DESPLDistCalculator< Network, DistType, NbHopsType >, [125](#), [126](#)
- DFS
  - LinkPred::DFS< Network, NodeProcessor >, [132](#)
- DGI
  - LinkPred::PR< PredResultsT >, [571](#)
- DHDIPredictor
  - LinkPred::DHDIPredictor< Network, EdgeRndIt, ScoreRndIt, EdgeRndOutIt >, [135](#), [136](#)
- DHPIPredictor
  - LinkPred::DHPIPredictor< Network, EdgeRndIt, ScoreRndIt, EdgeRndOutIt >, [141](#)
- diag
  - LinkPred::GFMatrix, [334](#)
- difference\_type
  - LinkPred::DNetwork< LabelT, NodeIDT, EdgeT >::NodeDegIt, [475](#)
  - LinkPred::DNetwork< LabelT, NodeIDT, EdgeT >::NonEdgIt, [528](#)
  - LinkPred::PredResults< TestDataT, LPredictorT, ScoresContainerT >::ScoreIterator, [679](#)
  - LinkPred::TestData< Network, EdgeContT >::TestEdgIt, [711](#)
  - LinkPred::TestEdgeGen< Network, EdgeContT >::TNEdgIt, [721](#)
  - LinkPred::TestEdgeGen< Network, EdgeContT >::TPEdgIt, [730](#)
  - LinkPred::UNetwork< LabelT, NodeIDT, EdgeT >::NodeDegIt, [485](#)
  - LinkPred::UNetwork< LabelT, NodeIDT, EdgeT >::NonEdgIt, [518](#)
- Dijkstra
  - LinkPred::Dijkstra< Network, DistType, NbHopsType >, [148](#), [149](#)
- dim
  - LinkPred::Simp::Evaluator::Factory::ECLParams, [237](#)
  - LinkPred::Simp::Evaluator::Factory::ESMPParams, [261](#)
- DJIDPredictor
  - LinkPred::DJIDPredictor< Network, EdgeRndIt, ScoreRndIt, EdgeRndOutIt >, [160](#)
- DLCPPredictor
  - LinkPred::DLCPPredictor< Network, EdgeRndIt, ScoreRndIt, EdgeRndOutIt >, [165](#), [166](#)
- DLHNPredictor
  - LinkPred::DLHNPredictor< Network, EdgeRndIt, ScoreRndIt, EdgeRndOutIt >, [170](#), [171](#)
- DLPredictor
  - LinkPred::DLPredictor< NetworkT, EdgeRndItT, ScoreRndItT, EdgeRndOutItT >, [177](#)
- DNetwork
  - LinkPred::DNetwork< LabelT, NodeIDT, EdgeT >, [187](#), [188](#)
  - LinkPred::DNetwork< LabelT, NodeIDT, EdgeT >::NodeDegIt, [483](#)
  - LinkPred::DNetwork< LabelT, NodeIDT, EdgeT >::NonEdgIt, [535](#)
- DotProd
  - LinkPred::DotProd, [213](#), [214](#)
- DPATPredictor
  - LinkPred::DPATPredictor< Network, EdgeRndIt, ScoreRndIt, EdgeRndOutIt >, [217](#)
- DPSTPredictor
  - LinkPred::DPSTPredictor< Network, EdgeRndIt, ScoreRndIt, EdgeRndOutIt >, [222](#), [223](#)
- DSAPredictor
  - LinkPred::DSAPredictor< Network, EdgeRndIt, ScoreRndIt, EdgeRndOutIt >, [227](#), [228](#)
- DSOIPredictor
  - LinkPred::DSOIPredictor< Network, EdgeRndIt, ScoreRndIt, EdgeRndOutIt >, [233](#)
- ECEIT
  - LinkPred::TestData< Network, EdgeContT >, [696](#)
- Edge
  - LinkPred::ASPDistCalculator< Network, DistType, NbHopsType >, [61](#)
  - LinkPred::ASPDsimCalculator< Network, DsimType, NbHopsType >, [67](#)
  - LinkPred::DESPLDistCalculator< Network, DistType, NbHopsType >, [123](#)
  - LinkPred::Dijkstra< Network, DistType, NbHopsType >, [146](#)
  - LinkPred::DLPredictor< NetworkT, EdgeRndItT, ScoreRndItT, EdgeRndOutItT >, [175](#)
  - LinkPred::DNetwork< LabelT, NodeIDT, EdgeT >, [185](#)
  - LinkPred::Encoder< Network >, [255](#)
  - LinkPred::ESPDistCalculator< Network, DistType, NbHopsType >, [264](#)
  - LinkPred::ESPDsimCalculator< Network, DsimType, NbHopsType >, [272](#)
  - LinkPred::ESPIndSimlCalculator< Network, DistType, NbHopsType >, [279](#)
  - LinkPred::ESPLDistCalculator< Network, DistType, NbHopsType >, [285](#)
  - LinkPred::ESPLSimlCalculator< Network, DistType, NbHopsType >, [295](#)
  - LinkPred::ESPSimlCalculator< Network, DistType, NbHopsType >, [304](#)
  - LinkPred::NetDistCalculator< Network, DistType, NbHopsType >, [433](#)
  - LinkPred::NetIndSimlCalculator< Network, DistType, NbHopsType >, [439](#)
  - LinkPred::NetSimlCalculator< Network, DistType, NbHopsType >, [444](#)
  - LinkPred::NetworkManipulator< Network >, [452](#)
  - LinkPred::TestData< Network, EdgeContT >, [694](#)
  - LinkPred::UKABPredictor< Network, EdgeRndIt, ScoreRndIt, EdgeRndOutIt >, [818](#)



- LinkPred::ULPredictor< NetworkT, EdgeRndItT, ScoreRndItT, EdgeRndOutItT >, [836](#)
- LinkPred::UNEDPredictor< Network, EdgeRndIt, ScoreRndIt, EdgeRndOutIt >, [862](#)
- LinkPred::UNetwork< LabelT, NodeIDT, EdgeT >, [870](#)
- EdgeIt
  - LinkPred::DNetwork< LabelT, NodeIDT, EdgeT >, [185](#)
  - LinkPred::TestData< Network, EdgeContT >, [695](#)
  - LinkPred::UNetwork< LabelT, NodeIDT, EdgeT >, [870](#)
- EdgeLengthMap
  - LinkPred::ASPDistCalculator< Network, DistType, NbHopsType >, [61](#)
  - LinkPred::ASPDsimCalculator< Network, DsimType, NbHopsType >, [68](#)
  - LinkPred::DESPLDistCalculator< Network, DistType, NbHopsType >, [123](#)
  - LinkPred::Dijkstra< Network, DistType, NbHopsType >, [146](#)
  - LinkPred::ESPDistCalculator< Network, DistType, NbHopsType >, [264](#)
  - LinkPred::ESPDsimCalculator< Network, DsimType, NbHopsType >, [272](#)
  - LinkPred::ESPIndSimlCalculator< Network, DistType, NbHopsType >, [279](#)
  - LinkPred::ESPLDistCalculator< Network, DistType, NbHopsType >, [286](#)
  - LinkPred::ESPLSimlCalculator< Network, DistType, NbHopsType >, [295](#)
  - LinkPred::ESPSimlCalculator< Network, DistType, NbHopsType >, [304](#)
  - LinkPred::NetDistCalculator< Network, DistType, NbHopsType >, [434](#)
  - LinkPred::NetIndSimlCalculator< Network, DistType, NbHopsType >, [439](#)
  - LinkPred::NetSimlCalculator< Network, DistType, NbHopsType >, [445](#)
- EdgeLengthMapSP
  - LinkPred::ASPDistCalculator< Network, DistType, NbHopsType >, [61](#)
  - LinkPred::ASPDsimCalculator< Network, DsimType, NbHopsType >, [68](#)
  - LinkPred::DESPLDistCalculator< Network, DistType, NbHopsType >, [124](#)
  - LinkPred::Dijkstra< Network, DistType, NbHopsType >, [147](#)
  - LinkPred::ESPDistCalculator< Network, DistType, NbHopsType >, [264](#)
  - LinkPred::ESPDsimCalculator< Network, DsimType, NbHopsType >, [272](#)
  - LinkPred::ESPIndSimlCalculator< Network, DistType, NbHopsType >, [279](#)
  - LinkPred::ESPLDistCalculator< Network, DistType, NbHopsType >, [286](#)
  - LinkPred::ESPLSimlCalculator< Network, DistType, NbHopsType >, [295](#)
- LinkPred::ESPSimlCalculator< Network, DistType, NbHopsType >, [304](#)
- LinkPred::NetDistCalculator< Network, DistType, NbHopsType >, [434](#)
- LinkPred::NetIndSimlCalculator< Network, DistType, NbHopsType >, [439](#)
- LinkPred::NetSimlCalculator< Network, DistType, NbHopsType >, [445](#)
- LinkPred::ESPSimlCalculator< Network, DistType, NbHopsType >, [304](#)
- LinkPred::NetDistCalculator< Network, DistType, NbHopsType >, [434](#)
- LinkPred::NetIndSimlCalculator< Network, DistType, NbHopsType >, [439](#)
- LinkPred::NetSimlCalculator< Network, DistType, NbHopsType >, [445](#)
- EdgeLengthMethod
  - LinkPred::UMPSPredictor< Network, EdgeRndIt, ScoreRndIt, EdgeRndOutIt >, [846](#)
- EdgeMap
  - LinkPred::DNetwork< LabelT, NodeIDT, EdgeT >::EdgeMap< ValueType >, [246](#)
  - LinkPred::NetworkManipulator< Network >, [452](#)
  - LinkPred::UNetwork< LabelT, NodeIDT, EdgeT >::EdgeMap< ValueType >, [239](#), [240](#)
- EdgeMapConstIt
  - LinkPred::DNetwork< LabelT, NodeIDT, EdgeT >::EdgeMap< ValueType >, [245](#)
  - LinkPred::UNetwork< LabelT, NodeIDT, EdgeT >::EdgeMap< ValueType >, [239](#)
- EdgeMapIt
  - LinkPred::DNetwork< LabelT, NodeIDT, EdgeT >::EdgeMap< ValueType >, [245](#)
  - LinkPred::UNetwork< LabelT, NodeIDT, EdgeT >::EdgeMap< ValueType >, [239](#)
- EdgeMapSP
  - LinkPred::DNetwork< LabelT, NodeIDT, EdgeT >, [186](#)
  - LinkPred::UNetwork< LabelT, NodeIDT, EdgeT >, [870](#)
- EdgeRndIt
  - LinkPred::DLPredictor< NetworkT, EdgeRndItT, ScoreRndItT, EdgeRndOutItT >, [175](#)
  - LinkPred::ULPredictor< NetworkT, EdgeRndItT, ScoreRndItT, EdgeRndOutItT >, [836](#)
- EdgeRndOutIt
  - LinkPred::DLPredictor< NetworkT, EdgeRndItT, ScoreRndItT, EdgeRndOutItT >, [176](#)
  - LinkPred::ULPredictor< NetworkT, EdgeRndItT, ScoreRndItT, EdgeRndOutItT >, [836](#)
- edgesBegin
  - LinkPred::DNetwork< LabelT, NodeIDT, EdgeT >, [192](#)
  - LinkPred::UNetwork< LabelT, NodeIDT, EdgeT >, [877](#)
- edgesEnd
  - LinkPred::DNetwork< LabelT, NodeIDT, EdgeT >, [193](#)
  - LinkPred::UNetwork< LabelT, NodeIDT, EdgeT >, [877](#)
- elemMult
  - LinkPred::GFMatrix, [335](#)
- empty
  - LinkPred::LMapQueue< K, P, KComparator, PComparator >, [389](#)
- encode

- LinkPred::DeepWalk< Network >, [115](#)
- LinkPred::Encoder< Network >, [257](#)
- LinkPred::HMSM< Network >, [353](#)
- LinkPred::LargeVis< Network >, [370](#)
- LinkPred::LINE< Network >, [379](#)
- LinkPred::MatFact< Network >, [419](#)
- LinkPred::Node2Vec< Network >, [467](#)
- Encoder
  - LinkPred::Encoder< Network >, [256](#)
- encoderName
  - LinkPred::Simp::Evaluator::Factory::ECLParams, [237](#)
  - LinkPred::Simp::Evaluator::Factory::ESMParams, [261](#)
- end
  - LinkPred::DNetwork< LabelT, NodeIDT, EdgeT >, [193](#)
  - LinkPred::DNetwork< LabelT, NodeIDT, EdgeT >::EdgeMap< ValueType >, [248](#)
  - LinkPred::DNetwork< LabelT, NodeIDT, EdgeT >::NodeMap< ValueType >, [503](#)
  - LinkPred::DNetwork< LabelT, NodeIDT, EdgeT >::NodeSMap< ValueType >, [508](#)
  - LinkPred::LMapQueue< K, P, KComparator, PComparator >, [389](#)
  - LinkPred::UNetwork< LabelT, NodeIDT, EdgeT >, [877](#)
  - LinkPred::UNetwork< LabelT, NodeIDT, EdgeT >::EdgeMap< ValueType >, [241](#)
  - LinkPred::UNetwork< LabelT, NodeIDT, EdgeT >::NodeMap< ValueType >, [497](#)
  - LinkPred::UNetwork< LabelT, NodeIDT, EdgeT >::NodeSMap< ValueType >, [514](#)
- epsilon
  - LinkPred::Simp::Evaluator::Factory::LCPPParams, [376](#)
- ESPDistCalculator
  - LinkPred::ESPDistCalculator< Network, DistType, NbHopsType >, [265](#), [267](#)
- ESPDsimCalculator
  - LinkPred::ESPDsimCalculator< Network, Dsim-Type, NbHopsType >, [273](#), [275](#)
- ESPLDistCalculator
  - LinkPred::ESPLDistCalculator< Network, Dist-Type, NbHopsType >, [287](#), [288](#)
- ESPLSimCalculator
  - LinkPred::ESPLSimCalculator< Network, Dist-Type, NbHopsType >, [296](#), [297](#)
- ESPSimCalculator
  - LinkPred::ESPSimCalculator< Network, DistType, NbHopsType >, [306](#)
- eval
  - LinkPred::GCurve< PredResultsT >, [328](#), [329](#)
  - LinkPred::PerfCurve< PredResultsT >, [544](#), [545](#)
  - LinkPred::PerfEvaluator< TestDataT, LPredictorT, PredResultsT, PerfMeasureT >, [559](#)
  - LinkPred::PerfMeasure< PredResultsT >, [565](#)
  - LinkPred::PR< PredResultsT >, [572](#), [573](#)
  - LinkPred::ROC< PredResultsT >, [670](#), [671](#)
  - LinkPred::TPR< PredResultsT >, [741](#), [742](#)
- evalNoStream
  - LinkPred::ROC< PredResultsT >, [671](#)
- evalNoTiming
  - LinkPred::PerfEvaluator< TestDataT, LPredictorT, PredResultsT, PerfMeasureT >, [559](#)
- evalStream
  - LinkPred::ROC< PredResultsT >, [672](#)
- evalTiming
  - LinkPred::PerfEvaluator< TestDataT, LPredictorT, PredResultsT, PerfMeasureT >, [559](#)
- Evaluator
  - LinkPred::Simp::Evaluator, [311](#)
- evalUsingPredict
  - LinkPred::TPR< PredResultsT >, [742](#)
- evalUsingTop
  - LinkPred::TPR< PredResultsT >, [743](#)
- f
  - LinkPred::LogMDSCG, [404](#)
  - LinkPred::LogRegCG< InRndIt, OutRndIt >, [409](#)
  - LinkPred::MatFactCG, [425](#)
- FastSig
  - LinkPred::FastSig< T >, [321](#), [322](#)
- fdr
  - perfmeasure.hpp, [1052](#)
- fgrad
  - LinkPred::LogMDSCG, [404](#)
  - LinkPred::LogRegCG< InRndIt, OutRndIt >, [409](#)
  - LinkPred::MatFactCG, [425](#)
- fileName
  - LinkPred::Simp::Evaluator::Factory::PSTParams, [626](#)
- filter
  - LinkPred::Utils, [49](#)
- finalize
  - LinkPred::LogMDSCG, [404](#)
  - LinkPred::LogRegCG< InRndIt, OutRndIt >, [410](#)
  - LinkPred::MatFactCG, [426](#)
- find
  - LinkPred::DNetwork< LabelT, NodeIDT, EdgeT >::EdgeMap< ValueType >, [248](#)
  - LinkPred::DNetwork< LabelT, NodeIDT, EdgeT >::NodeSMap< ValueType >, [508](#)
  - LinkPred::LMapQueue< K, P, KComparator, PComparator >, [390](#)
  - LinkPred::UNetwork< LabelT, NodeIDT, EdgeT >::EdgeMap< ValueType >, [242](#)
  - LinkPred::UNetwork< LabelT, NodeIDT, EdgeT >::NodeSMap< ValueType >, [514](#)
  - LinkPred::Vec, [952](#)
- findLabel
  - LinkPred::DNetwork< LabelT, NodeIDT, EdgeT >, [193](#)



- LinkPred::UNetwork< LabelT, NodeIDT, EdgeT >, 877
- findNode
  - LinkPred::DNetwork< LabelT, NodeIDT, EdgeT >, 194
  - LinkPred::UNetwork< LabelT, NodeIDT, EdgeT >, 878
- findNz
  - LinkPred::Vec, 952
- flip
  - LinkPred::Utils, 49
- flipMap
  - LinkPred::Utils, 50
- fmr
  - perfmeasure.hpp, 1052
- FN
  - LinkPred, 39
- fnr
  - perfmeasure.hpp, 1053
- fnRatio
  - LinkPred::PerfEvalExpDescp< Network >, 548
- FP
  - LinkPred, 39
- fpr
  - perfmeasure.hpp, 1053
- gamma
  - LinkPred::Simp::Evaluator::Factory::HYPPParams, 359
- GCurve
  - LinkPred::GCurve< PredResultsT >, 327, 328
- generateERN
  - LinkPred::UNetwork< LabelT, NodeIDT, EdgeT >, 878
- generateREG
  - LinkPred::UNetwork< LabelT, NodeIDT, EdgeT >, 879
- generateRNC
  - LinkPred::UNetwork< LabelT, NodeIDT, EdgeT >, 879
- generateTN
  - LinkPred::TestEdgeGen< Network, EdgeContT >, 706
- generateTP
  - LinkPred::TestEdgeGen< Network, EdgeContT >, 707
- genNeg
  - LinkPred::TestData< Network, EdgeContT >, 698
- genPos
  - LinkPred::TestData< Network, EdgeContT >, 698
- genTestData
  - LinkPred::Simp::Evaluator, 319
- get
  - LinkPred::GFMatrix, 335
- getAlg
  - LinkPred::MDS, 430
- getAllNegLinksExcept
  - LinkPred::NetworkManipulator< Network >, 459
- getAlpha
  - LinkPred::DeepWalk< Network >, 116
  - LinkPred::HMSM< Network >, 354
- getAsp
  - LinkPred::UMPSPredictor< Network, EdgeRndIt, ScoreRndIt, EdgeRndOutIt >, 848
  - LinkPred::USHPPredictor< Network, EdgeRndIt, ScoreRndIt, EdgeRndOutIt >, 930
- getAvgDeg
  - LinkPred::DNetwork< LabelT, NodeIDT, EdgeT >, 194
  - LinkPred::UNetwork< LabelT, NodeIDT, EdgeT >, 879
- getAvgInDeg
  - LinkPred::DNetwork< LabelT, NodeIDT, EdgeT >, 194
- getAvgOutDeg
  - LinkPred::DNetwork< LabelT, NodeIDT, EdgeT >, 194
- getBool
  - LinkPred::RandomGen, 628
- getCacheHits
  - LinkPred::ESPDistCalculator< Network, DistType, NbHopsType >, 268
- getCacheLevel
  - LinkPred::UKABPredictor< Network, EdgeRndIt, ScoreRndIt, EdgeRndOutIt >, 820
  - LinkPred::UMPSPredictor< Network, EdgeRndIt, ScoreRndIt, EdgeRndOutIt >, 848
  - LinkPred::USHPPredictor< Network, EdgeRndIt, ScoreRndIt, EdgeRndOutIt >, 931
- getCacheMiss
  - LinkPred::ESPDistCalculator< Network, DistType, NbHopsType >, 268
- getCC
  - LinkPred::UNetwork< LabelT, NodeIDT, EdgeT >, 880
- getClassifier
  - LinkPred::UECLPredictor< Network, EdgeRndIt, ScoreRndIt, EdgeRndOutIt >, 771
- getCol
  - LinkPred::GFMatrix, 335
- getCols
  - LinkPred::GFMatrix, 336
- getCommonNeighbors
  - LinkPred::UNetwork< LabelT, NodeIDT, EdgeT >, 880, 881
- getCount
  - LinkPred::Counter< Network >, 100
- getCSR
  - LinkPred::UNetwork< LabelT, NodeIDT, EdgeT >, 881
- getCurve
  - LinkPred::GCurve< PredResultsT >, 329, 330
  - LinkPred::PerfCurve< PredResultsT >, 545, 546
  - LinkPred::PR< PredResultsT >, 573, 574
  - LinkPred::ROC< PredResultsT >, 672
- getDefaultDim
  - LinkPred::DeepWalk< Network >, 116

- LinkPred::HMSM< Network >, 354
- LinkPred::LargeVis< Network >, 370
- LinkPred::LINE< Network >, 379
- LinkPred::MatFact< Network >, 419
- LinkPred::Node2Vec< Network >, 468
- getDeg
  - LinkPred::DNetwork< LabelT, NodeIDT, EdgeT >, 195
  - LinkPred::UNetwork< LabelT, NodeIDT, EdgeT >, 881
- getDegStat
  - LinkPred::DNetwork< LabelT, NodeIDT, EdgeT >, 195
  - LinkPred::UNetwork< LabelT, NodeIDT, EdgeT >, 882
- getDim
  - LinkPred::Encoder< Network >, 257
- getDirIndSiml
  - LinkPred::ESPIndSimlCalculator< Network, DistType, NbHopsType >, 282
  - LinkPred::NetIndSimlCalculator< Network, DistType, NbHopsType >, 440
- getDirSiml
  - LinkPred::ESPLSimlCalculator< Network, DistType, NbHopsType >, 298
  - LinkPred::ESPSimlCalculator< Network, DistType, NbHopsType >, 307
  - LinkPred::NetSimlCalculator< Network, DistType, NbHopsType >, 446
- getDiscDist
  - LinkPred::NetDistCalculator< Network, DistType, NbHopsType >, 435
  - LinkPred::NetIndSimlCalculator< Network, DistType, NbHopsType >, 441
  - LinkPred::NetSimlCalculator< Network, DistType, NbHopsType >, 447
- getDiscNbHops
  - LinkPred::NetDistCalculator< Network, DistType, NbHopsType >, 435
  - LinkPred::NetIndSimlCalculator< Network, DistType, NbHopsType >, 441
  - LinkPred::NetSimlCalculator< Network, DistType, NbHopsType >, 447
- getDist
  - LinkPred::ASPDistCalculator< Network, DistType, NbHopsType >, 63, 64
  - LinkPred::ASPDsimCalculator< Network, DsimType, NbHopsType >, 70, 71
  - LinkPred::DESPLDistCalculator< Network, DistType, NbHopsType >, 127
  - LinkPred::Dijkstra< Network, DistType, NbHopsType >, 150
  - LinkPred::ESPDistCalculator< Network, DistType, NbHopsType >, 268
  - LinkPred::ESPDsimCalculator< Network, DsimType, NbHopsType >, 276
  - LinkPred::ESPLDistCalculator< Network, DistType, NbHopsType >, 289
  - LinkPred::NetDistCalculator< Network, DistType, NbHopsType >, 436
  - getDistL
    - LinkPred::Dijkstra< Network, DistType, NbHopsType >, 151
  - getDouble
    - LinkPred::RandomGen, 628
  - getDsim
    - LinkPred::Dijkstra< Network, DistType, NbHopsType >, 151, 153
  - getEdgeCode
    - LinkPred::Encoder< Network >, 257, 258
  - getEdgeCodeDim
    - LinkPred::Encoder< Network >, 258
  - getEdgeLengthMethod
    - LinkPred::UMPSPredictor< Network, EdgeRndIt, ScoreRndIt, EdgeRndOutIt >, 848
  - getEg
    - LinkPred::TestData< Network, EdgeContT >, 698
  - getEncoder
    - LinkPred::UECLPredictor< Network, EdgeRndIt, ScoreRndIt, EdgeRndOutIt >, 771
    - LinkPred::UESMPredictor< Network, EdgeRndIt, ScoreRndIt, EdgeRndOutIt >, 778
  - getEps
    - LinkPred::HMSM< Network >, 354
  - getEpsilon
    - LinkPred::ULCPPredictor< Network, EdgeRndIt, ScoreRndIt, EdgeRndOutIt >, 826
  - getFactory
    - LinkPred::PerfEvalExp< Network, TestDataT, LPredictorT, PredResultsT, PerfMeasureT >, 552
  - getFinDistMapNoNeighb
    - LinkPred::DESPLDistCalculator< Network, DistType, NbHopsType >, 128
    - LinkPred::ESPLDistCalculator< Network, DistType, NbHopsType >, 290
  - getGamma
    - LinkPred::LargeVis< Network >, 371
    - LinkPred::UHYPYPredictor< Network, EdgeRndIt, ScoreRndIt, EdgeRndOutIt >, 806
  - getGCurve
    - LinkPred::GCurve< PredResultsT >, 330
  - getGCurveAuc
    - LinkPred::GCurve< PredResultsT >, 330
  - getGeo
    - LinkPred::RandomGen, 629
  - getHorizLim
    - LinkPred::UKABPredictor< Network, EdgeRndIt, ScoreRndIt, EdgeRndOutIt >, 820
  - getHProb
    - LinkPred::HMSM< Network >, 354
  - getID
    - LinkPred::DNetwork< LabelT, NodeIDT, EdgeT >, 195
    - LinkPred::Simp::Predictor, 581
    - LinkPred::UNetwork< LabelT, NodeIDT, EdgeT >, 881

- 882
- getIndDist
  - LinkPred::ASPDistCalculator< Network, DistType, NbHopsType >, 64
  - LinkPred::ASPDsimCalculator< Network, DsimType, NbHopsType >, 71
  - LinkPred::DESPLDistCalculator< Network, DistType, NbHopsType >, 128
  - LinkPred::Dijkstra< Network, DistType, NbHopsType >, 153
  - LinkPred::ESPDistCalculator< Network, DistType, NbHopsType >, 269
  - LinkPred::ESPDsimCalculator< Network, DsimType, NbHopsType >, 276
  - LinkPred::ESPLDistCalculator< Network, DistType, NbHopsType >, 290
  - LinkPred::NetDistCalculator< Network, DistType, NbHopsType >, 436
- getIndDistToAll
  - LinkPred::Dijkstra< Network, DistType, NbHopsType >, 154
- getIndDsim
  - LinkPred::Dijkstra< Network, DistType, NbHopsType >, 154
- getInDeg
  - LinkPred::DNetwork< LabelT, NodeIDT, EdgeT >, 196
- getInDegStat
  - LinkPred::DNetwork< LabelT, NodeIDT, EdgeT >, 196
- getIndSiml
  - LinkPred::ESPIndSimlCalculator< Network, DistType, NbHopsType >, 282
  - LinkPred::NetIndSimlCalculator< Network, DistType, NbHopsType >, 441
- getInitLR
  - LinkPred::DeepWalk< Network >, 116
  - LinkPred::LargeVis< Network >, 371
  - LinkPred::Node2Vec< Network >, 468
- getInitLr
  - LinkPred::LINE< Network >, 380
- getInOutDeg
  - LinkPred::DNetwork< LabelT, NodeIDT, EdgeT >, 197
- getInt
  - LinkPred::RandomGen, 629
- getInterpolMethod
  - LinkPred::PR< PredResultsT >, 574
- getL
  - LinkPred::LMapQueue< K, P, KComparator, PComparator >, 390
  - LinkPred::UHYPYPredictor< Network, EdgeRndIt, ScoreRndIt, EdgeRndOutIt >, 806
- getLabel
  - LinkPred::DNetwork< LabelT, NodeIDT, EdgeT >, 197
  - LinkPred::Simp::Predictor, 581
  - LinkPred::UNetwork< LabelT, NodeIDT, EdgeT >, 883
- getLambda
  - LinkPred::LogisticRegressor< InRndIt, OutRndIt, ScoreRndIt >, 398
  - LinkPred::LogRegCG< InRndIt, OutRndIt >, 410
  - LinkPred::MatFact< Network >, 419
  - LinkPred::NetIndSimlCalculator< Network, DistType, NbHopsType >, 442
  - LinkPred::NetSimlCalculator< Network, DistType, NbHopsType >, 447
  - LinkPred::UMPSPredictor< Network, EdgeRndIt, ScoreRndIt, EdgeRndOutIt >, 849
- getLambdaMethod
  - LinkPred::UMPSPredictor< Network, EdgeRndIt, ScoreRndIt, EdgeRndOutIt >, 849
- getLambdaNegEstRatio
  - LinkPred::UMPSPredictor< Network, EdgeRndIt, ScoreRndIt, EdgeRndOutIt >, 849
- getLambdaPosEstRatio
  - LinkPred::UMPSPredictor< Network, EdgeRndIt, ScoreRndIt, EdgeRndOutIt >, 849
- getLambdaStep
  - LinkPred::UMPSPredictor< Network, EdgeRndIt, ScoreRndIt, EdgeRndOutIt >, 850
- getLandmarkRatio
  - LinkPred::UMPSPredictor< Network, EdgeRndIt, ScoreRndIt, EdgeRndOutIt >, 850
  - LinkPred::USHPPredictor< Network, EdgeRndIt, ScoreRndIt, EdgeRndOutIt >, 931
- getLandmarkStrategy
  - LinkPred::UMPSPredictor< Network, EdgeRndIt, ScoreRndIt, EdgeRndOutIt >, 850
  - LinkPred::USHPPredictor< Network, EdgeRndIt, ScoreRndIt, EdgeRndOutIt >, 931
- getLength
  - LinkPred::UMPSPredictor< Network, EdgeRndIt, ScoreRndIt, EdgeRndOutIt >, 850
- getLim
  - LinkPred::DESPLDistCalculator< Network, DistType, NbHopsType >, 128
  - LinkPred::ESPLDistCalculator< Network, DistType, NbHopsType >, 291
  - LinkPred::ESPLSimlCalculator< Network, DistType, NbHopsType >, 298
- getLProb
  - LinkPred::HMSM< Network >, 354
- getM
  - LinkPred::GFMatrix, 336
  - LinkPred::UHYPYPredictor< Network, EdgeRndIt, ScoreRndIt, EdgeRndOutIt >, 806
- getMaxCodeLength
  - LinkPred::DeepWalk< Network >, 116
- getMaxDeg
  - LinkPred::DNetwork< LabelT, NodeIDT, EdgeT >, 197
  - LinkPred::UNetwork< LabelT, NodeIDT, EdgeT >, 883
- getMaxDist

- LinkPred::NetDistCalculator< Network, DistType, NbHopsType >, [437](#)
- getMaxInDeg
  - LinkPred::DNetwork< LabelT, NodeIDT, EdgeT >, [197](#)
- getMaxIter
  - LinkPred::UFBMPredictor< Network, EdgeRndIt, ScoreRndIt, EdgeRndOutIt >, [784](#)
  - LinkPred::USBMPredictor< Network, EdgeRndIt, ScoreRndIt, EdgeRndOutIt >, [924](#)
- getMaxLambda
  - LinkPred::UMPSPredictor< Network, EdgeRndIt, ScoreRndIt, EdgeRndOutIt >, [851](#)
- getMaxNbNodesInCache
  - LinkPred::DESPLDistCalculator< Network, DistType, NbHopsType >, [129](#)
  - LinkPred::ESPLDistCalculator< Network, DistType, NbHopsType >, [291](#)
  - LinkPred::ESPLSimlCalculator< Network, DistType, NbHopsType >, [299](#)
  - LinkPred::ESPSimlCalculator< Network, DistType, NbHopsType >, [308](#)
- getMaxOutDeg
  - LinkPred::DNetwork< LabelT, NodeIDT, EdgeT >, [198](#)
- getMinDeg
  - LinkPred::DNetwork< LabelT, NodeIDT, EdgeT >, [198](#)
  - LinkPred::UNetwork< LabelT, NodeIDT, EdgeT >, [883](#)
- getMinInDeg
  - LinkPred::DNetwork< LabelT, NodeIDT, EdgeT >, [198](#)
- getMinLambda
  - LinkPred::UMPSPredictor< Network, EdgeRndIt, ScoreRndIt, EdgeRndOutIt >, [851](#)
- getMinOutDeg
  - LinkPred::DNetwork< LabelT, NodeIDT, EdgeT >, [198](#)
- getN
  - LinkPred::GFMatrix, [336](#)
- getName
  - LinkPred::Classifier< InRndIt, OutRndIt, ScoreRndIt >, [90](#)
  - LinkPred::DLPredictor< NetworkT, EdgeRndItT, ScoreRndItT, EdgeRndOutItT >, [178](#)
  - LinkPred::Encoder< Network >, [258](#)
  - LinkPred::GFMatrix, [336](#)
  - LinkPred::PerfMeasure< PredResultsT >, [566](#)
  - LinkPred::SimMeasure, [691](#)
  - LinkPred::ULPredictor< NetworkT, EdgeRndItT, ScoreRndItT, EdgeRndOutItT >, [838](#)
- getNbBeans
  - LinkPred::UHRGPredictor< Network, EdgeRndIt, ScoreRndIt, EdgeRndOutIt >, [800](#)
- getNbCommonNeighbors
  - LinkPred::UNetwork< LabelT, NodeIDT, EdgeT >, [883](#)
- getNbCouples
  - LinkPred::DNetwork< LabelT, NodeIDT, EdgeT >, [199](#)
  - LinkPred::UNetwork< LabelT, NodeIDT, EdgeT >, [884](#)
- getNbEdges
  - LinkPred::DNetwork< LabelT, NodeIDT, EdgeT >, [199](#)
  - LinkPred::UNetwork< LabelT, NodeIDT, EdgeT >, [884](#)
- getNbInEdges
  - LinkPred::UNetwork< LabelT, NodeIDT, EdgeT >, [884](#)
- getNbMdsRuns
  - LinkPred::HMSM< Network >, [355](#)
- getNbNeg
  - LinkPred::TestData< Network, EdgeContT >, [698](#)
- getNbNegSamples
  - LinkPred::LargeVis< Network >, [371](#)
  - LinkPred::LINE< Network >, [380](#)
  - LinkPred::Node2Vec< Network >, [468](#)
- getNbNodes
  - LinkPred::DNetwork< LabelT, NodeIDT, EdgeT >, [199](#)
  - LinkPred::Simp::Predictor, [582](#)
  - LinkPred::UNetwork< LabelT, NodeIDT, EdgeT >, [884](#)
- getNbNodeWalks
  - LinkPred::DeepWalk< Network >, [117](#)
- getNbNonEdges
  - LinkPred::DNetwork< LabelT, NodeIDT, EdgeT >, [199](#)
  - LinkPred::UNetwork< LabelT, NodeIDT, EdgeT >, [885](#)
- getNbPaths
  - LinkPred::DNetwork< LabelT, NodeIDT, EdgeT >, [200](#)
  - LinkPred::UNetwork< LabelT, NodeIDT, EdgeT >, [885](#)
- getNbPerfMeasures
  - LinkPred::PerfEvaluator< TestDataT, LPredictorT, PredResultsT, PerfMeasureT >, [559](#)
- getNbPos
  - LinkPred::TestData< Network, EdgeContT >, [698](#)
- getNbPredictors
  - LinkPred::PerfEvaluator< TestDataT, LPredictorT, PredResultsT, PerfMeasureT >, [559](#)
- getNbRuns
  - LinkPred::MDS, [430](#)
- getNbSamples
  - LinkPred::LargeVis< Network >, [371](#)
  - LinkPred::UHRGPredictor< Network, EdgeRndIt, ScoreRndIt, EdgeRndOutIt >, [800](#)
- getNbTop
  - LinkPred::PredResults< TestDataT, LPredictorT, ScoresContainerT >, [617](#)
- getNbWalks
  - LinkPred::DeepWalk< Network >, [117](#)

- LinkPred::Node2Vec< Network >, [468](#)
- getNegClass
  - LinkPred::TestData< Network, EdgeContT >, [699](#)
- getNegRatio
  - LinkPred::MatFact< Network >, [419](#)
  - LinkPred::UECLPredictor< Network, EdgeRndIt, ScoreRndIt, EdgeRndOutIt >, [771](#)
- getNegSamplingPower
  - LinkPred::LargeVis< Network >, [371](#)
  - LinkPred::LINE< Network >, [380](#)
- getNegScore
  - LinkPred::UMPSPredictor< Network, EdgeRndIt, ScoreRndIt, EdgeRndOutIt >, [851](#)
- getNegSize
  - LinkPred::LargeVis< Network >, [372](#)
  - LinkPred::LINE< Network >, [380](#)
- getNegSortOrder
  - LinkPred::PredResults< TestDataT, LPredictorT, ScoresContainerT >, [618](#)
- getNet
  - LinkPred::Dijkstra< Network, DistType, NbHopsType >, [155](#)
  - LinkPred::DLPredictor< NetworkT, EdgeRndItT, ScoreRndItT, EdgeRndOutItT >, [178](#)
  - LinkPred::ULPredictor< NetworkT, EdgeRndItT, ScoreRndItT, EdgeRndOutItT >, [839](#)
- getNnzSimlMap
  - LinkPred::ESPLSimlCalculator< Network, DistType, NbHopsType >, [299](#)
  - LinkPred::NetSimlCalculator< Network, DistType, NbHopsType >, [447](#)
- getNnzSimlMapNoNeighb
  - LinkPred::ESPLSimlCalculator< Network, DistType, NbHopsType >, [299](#)
  - LinkPred::NetSimlCalculator< Network, DistType, NbHopsType >, [448](#)
- getNodeCode
  - LinkPred::Encoder< Network >, [258](#)
- getNodeCodeMap
  - LinkPred::Encoder< Network >, [259](#)
- getObsNet
  - LinkPred::TestData< Network, EdgeContT >, [699](#)
- getOrder
  - LinkPred::LINE< Network >, [381](#)
- getOutDeg
  - LinkPred::DNetwork< LabelT, NodeIDT, EdgeT >, [200](#)
- getOutDegStat
  - LinkPred::DNetwork< LabelT, NodeIDT, EdgeT >, [200](#)
- getOutPrec
  - LinkPred::PerfEvalExp< Network, TestDataT, LPredictorT, PredResultsT, PerfMeasureT >, [552](#)
- getP
  - LinkPred::LPSim, [414](#)
  - LinkPred::Node2Vec< Network >, [469](#)
- getPed
  - LinkPred::PerfEvalExp< Network, TestDataT, LPredictorT, PredResultsT, PerfMeasureT >, [552](#)
- getPerfMeasure
  - LinkPred::UMPSPredictor< Network, EdgeRndIt, ScoreRndIt, EdgeRndOutIt >, [851](#)
- getPerfMeasures
  - LinkPred::PEFactory< Network, LPredictorT, TestDataT, PerfMeasureT >, [541](#)
- getPerfRes
  - LinkPred::Simp::Evaluator, [320](#)
- getPL
  - LinkPred::RandomGen, [629](#)
- getPosClass
  - LinkPred::TestData< Network, EdgeContT >, [699](#)
- getPosRatio
  - LinkPred::MatFact< Network >, [420](#)
  - LinkPred::UECLPredictor< Network, EdgeRndIt, ScoreRndIt, EdgeRndOutIt >, [772](#)
- getPosScore
  - LinkPred::UMPSPredictor< Network, EdgeRndIt, ScoreRndIt, EdgeRndOutIt >, [852](#)
- getPosSortOrder
  - LinkPred::PredResults< TestDataT, LPredictorT, ScoresContainerT >, [618](#)
- getPRAuc
  - LinkPred::PR< PredResultsT >, [574](#)
- getPRAucDGI
  - LinkPred::PR< PredResultsT >, [575](#)
- getPRAucLIN
  - LinkPred::PR< PredResultsT >, [576](#)
- getPRCurve
  - LinkPred::PR< PredResultsT >, [576](#)
- getPredictor
  - LinkPred::PerfEvaluator< TestDataT, LPredictorT, PredResultsT, PerfMeasureT >, [560](#)
  - LinkPred::PredResults< TestDataT, LPredictorT, ScoresContainerT >, [618](#)
- getPredictors
  - LinkPred::PEFactory< Network, LPredictorT, TestDataT, PerfMeasureT >, [541](#)
- getQ
  - LinkPred::Node2Vec< Network >, [469](#)
- getRandom
  - LinkPred::Utils, [50](#)
- getRecNet
  - LinkPred::LINE< Network >, [381](#)
- getRecWeightMap
  - LinkPred::LINE< Network >, [381](#)
- getRefNet
  - LinkPred::TestData< Network, EdgeContT >, [699](#)
- getRemLinksMap
  - LinkPred::TestData< Network, EdgeContT >, [700](#)
- getRndNegLinksExcept
  - LinkPred::NetworkManipulator< Network >, [459](#)
- getRndPerm
  - LinkPred::Utils, [50](#)
- getRndPosLinksExcept



- LinkPred::NetworkManipulator< Network >, 459
- getROCAuc
  - LinkPred::ROC< PredResultsT >, 673
- getROCAucStrm
  - LinkPred::ROC< PredResultsT >, 673
- getROCCurve
  - LinkPred::ROC< PredResultsT >, 674
- getRow
  - LinkPred::GFMatrix, 337
- getRows
  - LinkPred::GFMatrix, 337
- getSDist
  - LinkPred::Dijkstra< Network, DistType, NbHopsType >, 155
- getSDistMap
  - LinkPred::DESPLDistCalculator< Network, DistType, NbHopsType >, 129
  - LinkPred::ESPLDistCalculator< Network, DistType, NbHopsType >, 291
- getSeed
  - LinkPred::RandomGen, 630
  - LinkPred::UHYPPredictor< Network, EdgeRndIt, ScoreRndIt, EdgeRndOutIt >, 806
- getSelfSiml
  - LinkPred::NetIndSimlCalculator< Network, DistType, NbHopsType >, 442
  - LinkPred::NetSimlCalculator< Network, DistType, NbHopsType >, 448
- getShortestPath
  - LinkPred::Dijkstra< Network, DistType, NbHopsType >, 156
- getSiml
  - LinkPred::ESPLSimlCalculator< Network, DistType, NbHopsType >, 300
  - LinkPred::ESPSimlCalculator< Network, DistType, NbHopsType >, 308
  - LinkPred::NetSimlCalculator< Network, DistType, NbHopsType >, 448
- getSimMeasure
  - LinkPred::UESMPredictor< Network, EdgeRndIt, ScoreRndIt, EdgeRndOutIt >, 778
- getSInt
  - LinkPred::RandomGen, 630
- getStepInterval
  - LinkPred::DeepWalk< Network >, 117
  - LinkPred::Node2Vec< Network >, 469
- getSubSample
  - LinkPred::Node2Vec< Network >, 469
- getT
  - LinkPred::UHYPPredictor< Network, EdgeRndIt, ScoreRndIt, EdgeRndOutIt >, 807
- getTestData
  - LinkPred::PredResults< TestDataT, LPredictorT, ScoresContainerT >, 618
- getTheta
  - LinkPred::LogisticRegressor< InRndIt, OutRndIt, ScoreRndIt >, 398
- getThresholds
  - LinkPred::GCurve< PredResultsT >, 331
  - LinkPred::PR< PredResultsT >, 577
  - LinkPred::ROC< PredResultsT >, 674
- getTol
  - LinkPred::HMSM< Network >, 355
  - LinkPred::LogisticRegressor< InRndIt, OutRndIt, ScoreRndIt >, 399
  - LinkPred::MatFact< Network >, 420
  - LinkPred::MDS, 431
  - LinkPred::UMPSPredictor< Network, EdgeRndIt, ScoreRndIt, EdgeRndOutIt >, 852
- getTotalSteps
  - LinkPred::DeepWalk< Network >, 117
  - LinkPred::Node2Vec< Network >, 470
- getTPR
  - LinkPred::TPR< PredResultsT >, 743
- getUInt
  - LinkPred::RandomGen, 630
- getValues
  - LinkPred::Vec, 952
- getVisited
  - LinkPred::Collector< Network >, 94
- getWalkLength
  - LinkPred::DeepWalk< Network >, 118
  - LinkPred::Node2Vec< Network >, 470
- getWeightMap
  - LinkPred::Encoder< Network >, 259
- getWindowSize
  - LinkPred::DeepWalk< Network >, 118
  - LinkPred::Node2Vec< Network >, 470
- getZeta
  - LinkPred::UHYPPredictor< Network, EdgeRndIt, ScoreRndIt, EdgeRndOutIt >, 807
- GFMatrix
  - LinkPred::GFMatrix, 333, 334
- grad
  - LinkPred::LogMDSCG, 405
  - LinkPred::LogRegCG< InRndIt, OutRndIt >, 410
  - LinkPred::MatFactCG, 426
- Graph algorithms., 24
- GraphTraversal
  - LinkPred::GraphTraversal< Network, NodeProcessor >, 348, 349
- HMSM
  - LinkPred::HMSM< Network >, 352, 353
- horizLim
  - LinkPred::Simp::Evaluator::Factory::KABParams, 361
- Hub
  - LinkPred::UMPSPredictor< Network, EdgeRndIt, ScoreRndIt, EdgeRndOutIt >, 847
  - LinkPred::USHPPredictor< Network, EdgeRndIt, ScoreRndIt, EdgeRndOutIt >, 929
- i
  - LinkPred::MatFactPbData, 428
  - LinkPred::Simp::EdgeScore, 252
  - LinkPred::Simp::EdgeScoreByID, 253

- LinkPred::Utils::EdgeScore< Label >, 251
- ifmax
  - LinkPred::Vec, 953
- ifmin
  - LinkPred::Vec, 953
- IHub
  - LinkPred::UMPSPredictor< Network, EdgeRndIt, ScoreRndIt, EdgeRndOutIt >, 847
  - LinkPred::USHPPredictor< Network, EdgeRndIt, ScoreRndIt, EdgeRndOutIt >, 929
- ilmax
  - LinkPred::Vec, 953
- ilmin
  - LinkPred::Vec, 953
- imax
  - LinkPred::Vec, 953
- imin
  - LinkPred::Vec, 954
- Inc
  - LinkPred, 40
- include/linkpred.hpp, 972
- include/linkpred/core/core.hpp, 973
- include/linkpred/core/dnetwork/dnetwork.hpp, 974
- include/linkpred/core/ds/bheap.hpp, 975
- include/linkpred/core/ds/bhmap.hpp, 976
- include/linkpred/core/ds/ds.hpp, 977
- include/linkpred/core/ds/lmapqueue.hpp, 978
- include/linkpred/core/unetwork/unetwork.hpp, 979
- include/linkpred/graphalg/encoders/deepwalk/deepwalk.hpp, 981
- include/linkpred/graphalg/encoders/encoder.hpp, 983
- include/linkpred/graphalg/encoders/encoders.hpp, 984
- include/linkpred/graphalg/encoders/hmsm/hmsm.hpp, 985
- include/linkpred/graphalg/encoders/largevis/largevis.hpp, 987
- include/linkpred/graphalg/encoders/lem/lem.hpp, 988
- include/linkpred/graphalg/encoders/line/line.hpp, 989
- include/linkpred/graphalg/encoders/lle/lle.hpp, 991
- include/linkpred/graphalg/encoders/matfact/matfact.hpp, 992
- include/linkpred/graphalg/encoders/matfact/matfactcg.hpp, 994
- include/linkpred/graphalg/encoders/node2vec/node2vec.hpp, 996
- include/linkpred/graphalg/graphalg.hpp, 997
- include/linkpred/graphalg/shortestpaths/dijkstra.hpp, 998
- include/linkpred/graphalg/shortestpaths/netdistcalculator.hpp, 999
- include/linkpred/graphalg/shortestpaths/shortestpaths.hpp, 1001
- include/linkpred/graphalg/traversal/graphtraversal.hpp, 1002
- include/linkpred/graphalg/traversal/traversal.hpp, 1004
- include/linkpred/instantiations.hpp, 1004
- include/linkpred/ml/classifiers/classifier.hpp, 1005
- include/linkpred/ml/classifiers/classifiers.hpp, 1007
- include/linkpred/ml/classifiers/ffn/ffn.hpp, 1008
- include/linkpred/ml/classifiers/linearsvm/linearsvm.hpp, 1010
- include/linkpred/ml/classifiers/logistic/logisticregressor.hpp, 1012
- include/linkpred/ml/classifiers/logistic/logregcg.hpp, 1015
- include/linkpred/ml/classifiers/naivebayes/naivebayes.hpp, 1016
- include/linkpred/ml/classifiers/rndclassifier/rndclassifier.hpp, 1017
- include/linkpred/ml/ml.hpp, 1020
- include/linkpred/ml/simmeasures/cosinesim.hpp, 1021
- include/linkpred/ml/simmeasures/dotprod.hpp, 1023
- include/linkpred/ml/simmeasures/l1sim.hpp, 1025
- include/linkpred/ml/simmeasures/l2sim.hpp, 1027
- include/linkpred/ml/simmeasures/lpsim.hpp, 1029
- include/linkpred/ml/simmeasures/pearson.hpp, 1031
- include/linkpred/ml/simmeasures/simmeasure.hpp, 1033
- include/linkpred/ml/simmeasures/simmeasures.hpp, 1034
- include/linkpred/numerical/linear/gfmatrix.hpp, 1035
- include/linkpred/numerical/linear/vec.hpp, 1037
- include/linkpred/numerical/mds/logmdscg.hpp, 1038
- include/linkpred/numerical/mds/mds.hpp, 1039
- include/linkpred/numerical/mf/fastsig.hpp, 1041
- include/linkpred/numerical/numerical.hpp, 1043
- include/linkpred/perf/networkmanipulator.hpp, 1043
- include/linkpred/perf/perf.hpp, 1046
- include/linkpred/perf/perfevaluator.hpp, 1047
- include/linkpred/perf/perfmeasure.hpp, 1049
- include/linkpred/perf/predresults.hpp, 1055
- include/linkpred/predictors/directed/dadapredictor.hpp, 1057
- include/linkpred/predictors/directed/dcnepredictor.hpp, 1059
- include/linkpred/predictors/directed/dhdipredictor.hpp, 1060
- include/linkpred/predictors/directed/dhpiipredictor.hpp, 1062
- include/linkpred/predictors/directed/directed.hpp, 1063
- include/linkpred/predictors/directed/djidpredictor.hpp, 1064
- include/linkpred/predictors/directed/dlcppredictor.hpp, 1066
- include/linkpred/predictors/directed/dlhnpredictor.hpp, 1067
- include/linkpred/predictors/directed/dlpredictor.hpp, 1069
- include/linkpred/predictors/directed/dpatpredictor.hpp, 1070
- include/linkpred/predictors/directed/dpstpredictor.hpp, 1071
- include/linkpred/predictors/directed/dsaipredictor.hpp, 1073
- include/linkpred/predictors/directed/dsoipredictor.hpp, 1074

- include/linkpred/predictors/predictors.hpp, 1076
- include/linkpred/predictors/undirected/uadapredictor.hpp, 1076
- include/linkpred/predictors/undirected/ucnepredictor.hpp, 1078
- include/linkpred/predictors/undirected/ucrapredictor.hpp, 1080
- include/linkpred/predictors/undirected/ucstp predictor.hpp, 1081
- include/linkpred/predictors/undirected/ueclpredictor.hpp, 1083
- include/linkpred/predictors/undirected/uesmpredictor.hpp, 1084
- include/linkpred/predictors/undirected/ufbmpredictor.hpp, 1086
- include/linkpred/predictors/undirected/uhdipredictor.hpp, 1087
- include/linkpred/predictors/undirected/uhipredictor.hpp, 1089
- include/linkpred/predictors/undirected/uhrgpredictor.hpp, 1090
- include/linkpred/predictors/undirected/uhyppredictor.hpp, 1092
- include/linkpred/predictors/undirected/ujidpredictor.hpp, 1094
- include/linkpred/predictors/undirected/ukabpredictor.hpp, 1096
- include/linkpred/predictors/undirected/ulcppredictor.hpp, 1098
- include/linkpred/predictors/undirected/ulhnpredictor.hpp, 1099
- include/linkpred/predictors/undirected/ulpredictor.hpp, 1101
- include/linkpred/predictors/undirected/umps predictor.hpp, 1102
- include/linkpred/predictors/undirected/undirected.hpp, 1102
- include/linkpred/predictors/undirected/unedpredictor.hpp, 1104
- include/linkpred/predictors/undirected/upatpredictor.hpp, 1106
- include/linkpred/predictors/undirected/upstp predictor.hpp, 1108
- include/linkpred/predictors/undirected/uralpredictor.hpp, 1109
- include/linkpred/predictors/undirected/urndpredictor.hpp, 1111
- include/linkpred/predictors/undirected/usaipredictor.hpp, 1113
- include/linkpred/predictors/undirected/usbmpredictor.hpp, 1114
- include/linkpred/predictors/undirected/ushppredictor.hpp, 1116
- include/linkpred/predictors/undirected/usoipredictor.hpp, 1118
- include/linkpred/predictors/undirected/usumpredictor.hpp, 1119
- include/linkpred/simp/edgescore.hpp, 1121
- include/linkpred/simp/evaluator.hpp, 1122
- include/linkpred/simp/perfres.hpp, 1123
- include/linkpred/simp/predictor.hpp, 1125
- include/linkpred/simp/simp.hpp, 1126
- include/linkpred/utls/log.hpp, 1127
- include/linkpred/utls/loglevel.hpp, 1128
- include/linkpred/utls/miscutls.hpp, 1129
- include/linkpred/utls/randomgen.hpp, 1132
- include/linkpred/utls/utls.hpp, 1133
- include/LinkPredConfig.hpp, 972
- increase
  - LinkPred::BHeap< T, P, ComparatorT, ComparatorP >, 80
- inEdgesBegin
  - LinkPred::DNetwork< LabelT, NodeIDT, EdgeT >, 201
- inEdgesEnd
  - LinkPred::DNetwork< LabelT, NodeIDT, EdgeT >, 201
- init
  - LinkPred::DADAPredictor< Network, EdgeRndIt, ScoreRndIt, EdgeRndOutIt >, 104
  - LinkPred::DCNEPredictor< Network, EdgeRndIt, ScoreRndIt, EdgeRndOutIt >, 110
  - LinkPred::DeepWalk< Network >, 118
  - LinkPred::DHDIPredictor< Network, EdgeRndIt, ScoreRndIt, EdgeRndOutIt >, 136
  - LinkPred::DHPIPredictor< Network, EdgeRndIt, ScoreRndIt, EdgeRndOutIt >, 142
  - LinkPred::DJIDPredictor< Network, EdgeRndIt, ScoreRndIt, EdgeRndOutIt >, 161
  - LinkPred::DLCPPredictor< Network, EdgeRndIt, ScoreRndIt, EdgeRndOutIt >, 166
  - LinkPred::DLHNPredictor< Network, EdgeRndIt, ScoreRndIt, EdgeRndOutIt >, 171
  - LinkPred::DLPredictor< NetworkT, EdgeRndItT, ScoreRndItT, EdgeRndOutItT >, 178
  - LinkPred::DPATPredictor< Network, EdgeRndIt, ScoreRndIt, EdgeRndOutIt >, 218
  - LinkPred::DPSTPredictor< Network, EdgeRndIt, ScoreRndIt, EdgeRndOutIt >, 223
  - LinkPred::DSAPredictor< Network, EdgeRndIt, ScoreRndIt, EdgeRndOutIt >, 228
  - LinkPred::DSOIPredictor< Network, EdgeRndIt, ScoreRndIt, EdgeRndOutIt >, 234
  - LinkPred::Encoder< Network >, 259
  - LinkPred::HMSM< Network >, 355
  - LinkPred::LargeVis< Network >, 372
  - LinkPred::LINE< Network >, 381
  - LinkPred::LogMDSCG, 405
  - LinkPred::LogRegCG< InRndIt, OutRndIt >, 411
  - LinkPred::MatFact< Network >, 420
  - LinkPred::MatFactCG, 426
  - LinkPred::Node2Vec< Network >, 470
  - LinkPred::UADAPredictor< Network, EdgeRndIt, ScoreRndIt, EdgeRndOutIt >, 748
  - LinkPred::UCNEPredictor< Network, EdgeRndIt, ScoreRndIt, EdgeRndOutIt >, 753



- LinkPred::UCRAPredictor< Network, EdgeRndIt, ScoreRndIt, EdgeRndOutIt >, [759](#)
- LinkPred::UCSTPredictor< Network, EdgeRndIt, ScoreRndIt, EdgeRndOutIt >, [765](#)
- LinkPred::UECLPredictor< Network, EdgeRndIt, ScoreRndIt, EdgeRndOutIt >, [772](#)
- LinkPred::UESMPredictor< Network, EdgeRndIt, ScoreRndIt, EdgeRndOutIt >, [778](#)
- LinkPred::UFBMPredictor< Network, EdgeRndIt, ScoreRndIt, EdgeRndOutIt >, [784](#)
- LinkPred::UHDIPredictor< Network, EdgeRndIt, ScoreRndIt, EdgeRndOutIt >, [789](#)
- LinkPred::UHPIPredictor< Network, EdgeRndIt, ScoreRndIt, EdgeRndOutIt >, [794](#)
- LinkPred::UHRGPredictor< Network, EdgeRndIt, ScoreRndIt, EdgeRndOutIt >, [800](#)
- LinkPred::UHYPYPredictor< Network, EdgeRndIt, ScoreRndIt, EdgeRndOutIt >, [807](#)
- LinkPred::UJIDPredictor< Network, EdgeRndIt, ScoreRndIt, EdgeRndOutIt >, [814](#)
- LinkPred::UKABPredictor< Network, EdgeRndIt, ScoreRndIt, EdgeRndOutIt >, [820](#)
- LinkPred::ULCPPredictor< Network, EdgeRndIt, ScoreRndIt, EdgeRndOutIt >, [827](#)
- LinkPred::ULHNPredictor< Network, EdgeRndIt, ScoreRndIt, EdgeRndOutIt >, [832](#)
- LinkPred::ULPredictor< NetworkT, EdgeRndItT, ScoreRndItT, EdgeRndOutItT >, [839](#)
- LinkPred::UMPSPredictor< Network, EdgeRndIt, ScoreRndIt, EdgeRndOutIt >, [852](#)
- LinkPred::UNEDPredictor< Network, EdgeRndIt, ScoreRndIt, EdgeRndOutIt >, [864](#)
- LinkPred::UPATPredictor< Network, EdgeRndIt, ScoreRndIt, EdgeRndOutIt >, [897](#)
- LinkPred::UPSTPredictor< Network, EdgeRndIt, ScoreRndIt, EdgeRndOutIt >, [903](#)
- LinkPred::URALPredictor< Network, EdgeRndIt, ScoreRndIt, EdgeRndOutIt >, [908](#)
- LinkPred::URNDPredictor< Network, EdgeRndIt, ScoreRndIt, EdgeRndOutIt >, [913](#)
- LinkPred::USAIPredictor< Network, EdgeRndIt, ScoreRndIt, EdgeRndOutIt >, [919](#)
- LinkPred::USBMPredictor< Network, EdgeRndIt, ScoreRndIt, EdgeRndOutIt >, [924](#)
- LinkPred::USHPPredictor< Network, EdgeRndIt, ScoreRndIt, EdgeRndOutIt >, [931](#)
- LinkPred::USOIPredictor< Network, EdgeRndIt, ScoreRndIt, EdgeRndOutIt >, [938](#)
- LinkPred::USUMPredictor< Network, EdgeRndIt, ScoreRndIt, EdgeRndOutIt >, [943](#)
- inNeighborsBegin
  - LinkPred::DNetwork< LabelT, NodeIDT, EdgeT >, [201](#)
- inNeighborsEnd
  - LinkPred::DNetwork< LabelT, NodeIDT, EdgeT >, [202](#)
- insert
  - LinkPred::Bhmap< K, P, Comparator >, [85](#)
- int\_cast
  - LinkPred::Utils, [51](#)
- InterpolMethod
  - LinkPred::PR< PredResultsT >, [571](#)
- lpoptMDS
  - LinkPred, [40](#)
- isConnected
  - LinkPred::NetworkManipulator< Network >, [460](#)
- isConstant
  - LinkPred::Vec, [954](#)
- isEdge
  - LinkPred::DNetwork< LabelT, NodeIDT, EdgeT >, [202](#)
  - LinkPred::UNetwork< LabelT, NodeIDT, EdgeT >, [885](#), [886](#)
- isEdgeByID
  - LinkPred::Simp::Predictor, [582](#)
- isEdgeByLabel
  - LinkPred::Simp::Predictor, [582](#)
- isEnabledReconstruct
  - LinkPred::LINE< Network >, [381](#)
- isLocked
  - LinkPred::TestData< Network, EdgeContT >, [700](#)
- isNegComputed
  - LinkPred::PredResults< TestDataT, LPredictorT, ScoresContainerT >, [619](#)
- isPosComputed
  - LinkPred::PredResults< TestDataT, LPredictorT, ScoresContainerT >, [619](#)
- isStrmEnabled
  - LinkPred::ROC< PredResultsT >, [675](#)
- isStrmNeg
  - LinkPred::ROC< PredResultsT >, [675](#)
- isTimingEnabled
  - LinkPred::PerfEvaluator< TestDataT, LPredictorT, PredResultsT, PerfMeasureT >, [560](#)
- isTnGenerated
  - LinkPred::TestData< Network, EdgeContT >, [700](#)
- isTopComputed
  - LinkPred::PredResults< TestDataT, LPredictorT, ScoresContainerT >, [619](#)
- isTpGenerated
  - LinkPred::TestData< Network, EdgeContT >, [700](#)
- isUseHops
  - LinkPred::ESPLSimlCalculator< Network, DistType, NbHopsType >, [300](#)
- isUseTopMethod
  - LinkPred::TPR< PredResultsT >, [743](#)
- IteratorType
  - LinkPred::TestData< Network, EdgeContT >, [695](#)
- j
  - LinkPred::MatFactPbData, [428](#)
  - LinkPred::Simp::EdgeScore, [252](#)
  - LinkPred::Simp::EdgeScoreByID, [253](#)
  - LinkPred::Utils::EdgeScore< Label >, [251](#)
- k\_const\_iterator
  - LinkPred::Bhmap< K, P, Comparator >, [84](#)

- kbegin
  - LinkPred::Bhmap< K, P, Comparator >, [86](#)
- keepConnected
  - LinkPred::PerfEvalExpDescp< Network >, [548](#)
- kend
  - LinkPred::Bhmap< K, P, Comparator >, [86](#)
- key
  - LinkPred::Bhmap< K, P, Comparator >, [86](#)
- kfind
  - LinkPred::Bhmap< K, P, Comparator >, [86](#)
- L
  - LinkPred::Simp::Evaluator::Factory::HYPPParams, [360](#)
- L1Sim
  - LinkPred::L1Sim, [362](#), [363](#)
- L2Sim
  - LinkPred::L2Sim, [365](#), [366](#)
- Label
  - LinkPred::ASPDistCalculator< Network, DistType, NbHopsType >, [61](#)
  - LinkPred::ASPDsimCalculator< Network, DsimType, NbHopsType >, [68](#)
  - LinkPred::DESPLDistCalculator< Network, DistType, NbHopsType >, [124](#)
  - LinkPred::Dijkstra< Network, DistType, NbHopsType >, [147](#)
  - LinkPred::DNetwork< LabelT, NodeIDT, EdgeT >, [186](#)
  - LinkPred::ESPDistCalculator< Network, DistType, NbHopsType >, [264](#)
  - LinkPred::ESPDsimCalculator< Network, DsimType, NbHopsType >, [272](#)
  - LinkPred::ESPIndSimCalculator< Network, DistType, NbHopsType >, [280](#)
  - LinkPred::ESPLDistCalculator< Network, DistType, NbHopsType >, [286](#)
  - LinkPred::ESPLSimCalculator< Network, DistType, NbHopsType >, [295](#)
  - LinkPred::ESPSimCalculator< Network, DistType, NbHopsType >, [304](#)
  - LinkPred::NetDistCalculator< Network, DistType, NbHopsType >, [434](#)
  - LinkPred::NetIndSimCalculator< Network, DistType, NbHopsType >, [439](#)
  - LinkPred::NetSimCalculator< Network, DistType, NbHopsType >, [445](#)
  - LinkPred::NetworkManipulator< Network >, [452](#)
  - LinkPred::UNetwork< LabelT, NodeIDT, EdgeT >, [870](#)
- LabelIt
  - LinkPred::DNetwork< LabelT, NodeIDT, EdgeT >, [186](#)
  - LinkPred::UNetwork< LabelT, NodeIDT, EdgeT >, [870](#)
- labelsBegin
  - LinkPred::DNetwork< LabelT, NodeIDT, EdgeT >, [203](#)
- LinkPred::UNetwork< LabelT, NodeIDT, EdgeT >, [886](#)
- labelsEnd
  - LinkPred::DNetwork< LabelT, NodeIDT, EdgeT >, [203](#)
  - LinkPred::UNetwork< LabelT, NodeIDT, EdgeT >, [886](#)
- LambdaMethod
  - LinkPred::UMPSPredictor< Network, EdgeRndIt, ScoreRndIt, EdgeRndOutIt >, [846](#)
- LandmarkStrategy
  - LinkPred::UMPSPredictor< Network, EdgeRndIt, ScoreRndIt, EdgeRndOutIt >, [846](#)
  - LinkPred::USHPPredictor< Network, EdgeRndIt, ScoreRndIt, EdgeRndOutIt >, [929](#)
- LargeVis
  - LinkPred::LargeVis< Network >, [369](#), [370](#)
- learn
  - LinkPred::Classifier< InRndIt, OutRndIt, ScoreRndIt >, [91](#)
  - LinkPred::DADAPredictor< Network, EdgeRndIt, ScoreRndIt, EdgeRndOutIt >, [104](#)
  - LinkPred::DCNEPredictor< Network, EdgeRndIt, ScoreRndIt, EdgeRndOutIt >, [110](#)
  - LinkPred::DHDIPredictor< Network, EdgeRndIt, ScoreRndIt, EdgeRndOutIt >, [137](#)
  - LinkPred::DHPIPredictor< Network, EdgeRndIt, ScoreRndIt, EdgeRndOutIt >, [142](#)
  - LinkPred::DJIDPredictor< Network, EdgeRndIt, ScoreRndIt, EdgeRndOutIt >, [161](#)
  - LinkPred::DLCPPredictor< Network, EdgeRndIt, ScoreRndIt, EdgeRndOutIt >, [167](#)
  - LinkPred::DLHNPredictor< Network, EdgeRndIt, ScoreRndIt, EdgeRndOutIt >, [172](#)
  - LinkPred::DLPredictor< NetworkT, EdgeRndItT, ScoreRndItT, EdgeRndOutItT >, [179](#)
  - LinkPred::DPATPredictor< Network, EdgeRndIt, ScoreRndIt, EdgeRndOutIt >, [218](#)
  - LinkPred::DPSTPredictor< Network, EdgeRndIt, ScoreRndIt, EdgeRndOutIt >, [223](#)
  - LinkPred::DSAPredictor< Network, EdgeRndIt, ScoreRndIt, EdgeRndOutIt >, [229](#)
  - LinkPred::DSOIPredictor< Network, EdgeRndIt, ScoreRndIt, EdgeRndOutIt >, [234](#)
  - LinkPred::LogisticRegressor< InRndIt, OutRndIt, ScoreRndIt >, [399](#)
  - LinkPred::RndClassifier< InRndIt, OutRndIt, ScoreRndIt >, [635](#)
  - LinkPred::UADAPredictor< Network, EdgeRndIt, ScoreRndIt, EdgeRndOutIt >, [748](#)
  - LinkPred::UCNEPredictor< Network, EdgeRndIt, ScoreRndIt, EdgeRndOutIt >, [753](#)
  - LinkPred::UCRAPredictor< Network, EdgeRndIt, ScoreRndIt, EdgeRndOutIt >, [759](#)
  - LinkPred::UCSTPredictor< Network, EdgeRndIt, ScoreRndIt, EdgeRndOutIt >, [765](#)
  - LinkPred::UECLPredictor< Network, EdgeRndIt, ScoreRndIt, EdgeRndOutIt >, [772](#)

- LinkPred::UESMPredictor< Network, EdgeRndIt, ScoreRndIt, EdgeRndOutIt >, [779](#)
- LinkPred::UFBMPredictor< Network, EdgeRndIt, ScoreRndIt, EdgeRndOutIt >, [784](#)
- LinkPred::UHDIPredictor< Network, EdgeRndIt, ScoreRndIt, EdgeRndOutIt >, [789](#)
- LinkPred::UHPIPredictor< Network, EdgeRndIt, ScoreRndIt, EdgeRndOutIt >, [794](#)
- LinkPred::UHRGPredictor< Network, EdgeRndIt, ScoreRndIt, EdgeRndOutIt >, [800](#)
- LinkPred::UHYPYPredictor< Network, EdgeRndIt, ScoreRndIt, EdgeRndOutIt >, [807](#)
- LinkPred::UJIDPredictor< Network, EdgeRndIt, ScoreRndIt, EdgeRndOutIt >, [814](#)
- LinkPred::UKABPredictor< Network, EdgeRndIt, ScoreRndIt, EdgeRndOutIt >, [821](#)
- LinkPred::ULCPPredictor< Network, EdgeRndIt, ScoreRndIt, EdgeRndOutIt >, [827](#)
- LinkPred::ULHNPredictor< Network, EdgeRndIt, ScoreRndIt, EdgeRndOutIt >, [832](#)
- LinkPred::ULPredictor< NetworkT, EdgeRndItT, ScoreRndItT, EdgeRndOutItT >, [839](#)
- LinkPred::UMPSPredictor< Network, EdgeRndIt, ScoreRndIt, EdgeRndOutIt >, [852](#)
- LinkPred::UNEDPredictor< Network, EdgeRndIt, ScoreRndIt, EdgeRndOutIt >, [864](#)
- LinkPred::UPATPredictor< Network, EdgeRndIt, ScoreRndIt, EdgeRndOutIt >, [897](#)
- LinkPred::UPSTPredictor< Network, EdgeRndIt, ScoreRndIt, EdgeRndOutIt >, [903](#)
- LinkPred::URALPredictor< Network, EdgeRndIt, ScoreRndIt, EdgeRndOutIt >, [908](#)
- LinkPred::URNDPredictor< Network, EdgeRndIt, ScoreRndIt, EdgeRndOutIt >, [913](#)
- LinkPred::USAIPredictor< Network, EdgeRndIt, ScoreRndIt, EdgeRndOutIt >, [919](#)
- LinkPred::USBMPredictor< Network, EdgeRndIt, ScoreRndIt, EdgeRndOutIt >, [925](#)
- LinkPred::USHPPredictor< Network, EdgeRndIt, ScoreRndIt, EdgeRndOutIt >, [932](#)
- LinkPred::USOIPredictor< Network, EdgeRndIt, ScoreRndIt, EdgeRndOutIt >, [938](#)
- LinkPred::USUMPredictor< Network, EdgeRndIt, ScoreRndIt, EdgeRndOutIt >, [943](#)
- LengthMapIdType
  - LinkPred::ASPDistCalculator< Network, DistType, NbHopsType >, [61](#)
  - LinkPred::ASPDsimCalculator< Network, DsimType, NbHopsType >, [68](#)
  - LinkPred::DESPLDistCalculator< Network, DistType, NbHopsType >, [124](#)
  - LinkPred::Dijkstra< Network, DistType, NbHopsType >, [147](#)
  - LinkPred::ESPDistCalculator< Network, DistType, NbHopsType >, [264](#)
  - LinkPred::ESPDsimCalculator< Network, DsimType, NbHopsType >, [272](#)
  - LinkPred::ESPIndSimlCalculator< Network, DistType, NbHopsType >, [280](#)
  - LinkPred::ESPLDistCalculator< Network, DistType, NbHopsType >, [286](#)
  - LinkPred::ESPLSimlCalculator< Network, DistType, NbHopsType >, [295](#)
  - LinkPred::ESPSimlCalculator< Network, DistType, NbHopsType >, [305](#)
  - LinkPred::NetDistCalculator< Network, DistType, NbHopsType >, [434](#)
  - LinkPred::NetIndSimlCalculator< Network, DistType, NbHopsType >, [439](#)
  - LinkPred::NetSimlCalculator< Network, DistType, NbHopsType >, [445](#)
- LIN
  - LinkPred::PR< PredResultsT >, [571](#)
- LINE
  - LinkPred::LINE< Network >, [378](#), [379](#)
- Link prediction algorithms, [28](#)
- LinkClass
  - LinkPred, [39](#)
- LinkPred, [33](#)
  - CacheLevel, [39](#)
  - CGMDS, [40](#)
  - Dec, [40](#)
  - FN, [39](#)
  - FP, [39](#)
  - Inc, [40](#)
  - IpoptMDS, [40](#)
  - LinkClass, [39](#)
  - logDebug, [40](#)
  - logDebug1, [40](#)
  - logDebug2, [40](#)
  - logDebug3, [40](#)
  - logError, [40](#)
  - logInfo, [40](#)
  - LogLevel, [39](#)
  - logWarning, [40](#)
  - MathPI, [46](#)
  - MDSAlg, [40](#)
  - NetworkCache, [39](#)
  - NoCache, [39](#)
  - NodeCache, [39](#)
  - None, [40](#)
  - operator\*, [40](#), [42](#)
  - operator^, [46](#)
  - operator+, [42](#), [43](#)
  - operator-, [44](#)
  - operator/, [45](#)
  - PerfResults, [38](#)
  - SortOrder, [40](#)
  - TN, [39](#)
  - TP, [39](#)
- LinkPred::ASPDistCalculator< Network, DistType, NbHopsType >, [59](#)
  - ~ASPDistCalculator, [63](#)
  - ASPDistCalculator, [62](#), [63](#)
  - Edge, [61](#)
  - EdgeLengthMap, [61](#)

- EdgeLengthMapSP, 61
- getDist, 63, 64
- getIndDist, 64
- Label, 61
- LengthMapIdType, 61
- NetworkSP, 62
- NodeDistMap, 62
- NodeDistMapSP, 62
- NodeID, 62
- operator=, 65
- setLandmarks, 65
- LinkPred::ASPDsimCalculator< Network, DsimType, NbHopsType >, 66
  - ~ASPDsimCalculator, 70
  - ASPDsimCalculator, 69, 70
  - Edge, 67
  - EdgeLengthMap, 68
  - EdgeLengthMapSP, 68
  - getDist, 70, 71
  - getIndDist, 71
  - Label, 68
  - LengthMapIdType, 68
  - NetworkSP, 68
  - NodeDsimMap, 68
  - NodeDsimMapSP, 69
  - NodeID, 69
  - operator=, 71, 72
  - setLandmarks, 72
- LinkPred::BFS< Network, NodeProcessor >, 73
  - ~BFS, 75
  - BFS, 74
  - operator=, 75
  - traverse, 76
- LinkPred::BHeap< T, P, ComparatorT, ComparatorP >, 76
  - ~BHeap, 79
  - BHeap, 78
  - contains, 79
  - decrease, 79
  - increase, 80
  - operator=, 80
  - pop, 80
  - print, 81
  - push, 81
  - set, 81
  - size, 82
  - top, 82
  - tryDecrease, 82
  - tryIncrease, 82
- LinkPred::Bhmap< K, P, Comparator >, 83
  - ~Bhmap, 85
  - Bhmap, 84, 85
  - insert, 85
  - k\_const\_iterator, 84
  - kbeg, 86
  - kend, 86
  - key, 86
  - kfind, 86
  - operator=, 87
  - p\_const\_iterator, 84
  - pbegin, 87
  - pend, 87
  - pfind, 88
  - pos, 88
  - size, 88
- LinkPred::Classifier< InRndIt, OutRndIt, ScoreRndIt >, 89
  - ~Classifier, 90
  - Classifier, 89, 90
  - getName, 90
  - learn, 91
  - operator=, 91
  - predict, 92
  - setName, 92
- LinkPred::Collector< Network >, 93
  - ~Collector, 94
  - Collector, 93, 94
  - getVisited, 94
  - operator=, 94, 95
  - process, 95
- LinkPred::CosineSim, 95
  - ~CosineSim, 97
  - CosineSim, 96, 97
  - operator=, 97, 98
  - sim, 98
- LinkPred::Counter< Network >, 98
  - ~Counter, 100
  - Counter, 99, 100
  - getCount, 100
  - operator=, 100, 101
  - process, 101
  - resetCount, 101
- LinkPred::DADAPredictor< Network, EdgeRndIt, ScoreRndIt, EdgeRndOutIt >, 102
  - ~DADAPredictor, 104
  - DADAPredictor, 103, 104
  - init, 104
  - learn, 104
  - operator=, 105
  - predict, 105
  - score, 106
  - top, 106
- LinkPred::DCNEPredictor< Network, EdgeRndIt, ScoreRndIt, EdgeRndOutIt >, 107
  - ~DCNEPredictor, 110
  - DCNEPredictor, 109
  - init, 110
  - learn, 110
  - operator=, 110, 111
  - predict, 111
  - score, 111
  - top, 112
- LinkPred::DeepWalk< Network >, 113
  - ~DeepWalk, 115
  - DeepWalk, 114, 115
  - encode, 115

- getAlpha, 116
- getDefaultDim, 116
- getInitLR, 116
- getMaxCodeLength, 116
- getNbNodeWalks, 117
- getNbWalks, 117
- getStepInterval, 117
- getTotalSteps, 117
- getWalkLength, 118
- getWindowSize, 118
- init, 118
- operator=, 118, 119
- setAlpha, 119
- setInitLR, 119
- setNbNodeWalks, 119
- setNbWalks, 120
- setStepInterval, 120
- setWalkLength, 120
- setWeightMap, 121
- setWindowSize, 121
- LinkPred::DESPLDistCalculator< Network, DistType, NbHopsType >, 121
  - ~DESPLDistCalculator, 126
  - DESPLDistCalculator, 125, 126
  - Edge, 123
  - EdgeLengthMap, 123
  - EdgeLengthMapSP, 124
  - getDist, 127
  - getFinDistMapNoNeighb, 128
  - getIndDist, 128
  - getLim, 128
  - getMaxNbNodesInCache, 129
  - getSDistMap, 129
  - Label, 124
  - LengthMapIdType, 124
  - NetworkSP, 124
  - NodeDistMap, 124
  - NodeDistMapSP, 124
  - NodeId, 125
  - NodeSDistMap, 125
  - NodeSDistMapSP, 125
  - operator=, 129, 130
  - setMaxNbNodesInCache, 130
- LinkPred::DFS< Network, NodeProcessor >, 130
  - ~DFS, 133
  - DFS, 132
  - operator=, 133
  - traverse, 133
- LinkPred::DHDIPredictor< Network, EdgeRndIt, ScoreRndIt, EdgeRndOutIt >, 134
  - ~DHDIPredictor, 136
  - DHDIPredictor, 135, 136
  - init, 136
  - learn, 137
  - operator=, 137
  - predict, 138
  - score, 138
  - top, 139
- LinkPred::DHPIPredictor< Network, EdgeRndIt, ScoreRndIt, EdgeRndOutIt >, 139
  - ~DHPIPredictor, 142
  - DHPIPredictor, 141
  - init, 142
  - learn, 142
  - operator=, 142, 143
  - predict, 143
  - score, 144
  - top, 144
- LinkPred::Dijkstra< Network, DistType, NbHopsType >, 145
  - ~Dijkstra, 149
  - Dijkstra, 148, 149
  - Edge, 146
  - EdgeLengthMap, 146
  - EdgeLengthMapSP, 147
  - getDist, 150
  - getDistL, 151
  - getDsim, 151, 153
  - getIndDist, 153
  - getIndDistToAll, 154
  - getIndDsim, 154
  - getNet, 155
  - getSDist, 155
  - getShortestPath, 156
  - Label, 147
  - LengthMapIdType, 147
  - NetworkSP, 147
  - NodeDistMap, 147
  - NodeDistMapSP, 147
  - NodeId, 148
  - NodeSDistMapSP, 148
  - operator=, 156, 157
  - PathType, 148
  - PathTypeSP, 148
  - registerLengthMap, 157
  - setNet, 157
  - unregisterLengthMap, 158
- LinkPred::DJIDPredictor< Network, EdgeRndIt, ScoreRndIt, EdgeRndOutIt >, 158
  - ~DJIDPredictor, 161
  - DJIDPredictor, 160
  - init, 161
  - learn, 161
  - operator=, 161, 162
  - predict, 162
  - score, 162
  - top, 163
- LinkPred::DLCPPredictor< Network, EdgeRndIt, ScoreRndIt, EdgeRndOutIt >, 164
  - ~DLCPPredictor, 166
  - DLCPPredictor, 165, 166
  - init, 166
  - learn, 167
  - operator=, 167
  - predict, 168
  - score, 168

- LinkPred::DLHNPredictor< Network, EdgeRndIt, ScoreRndIt, EdgeRndOutIt >, 169
  - ~DLHNPredictor, 171
  - DLHNPredictor, 170, 171
  - init, 171
  - learn, 172
  - operator=, 172
  - predict, 173
  - score, 173
  - top, 174
- LinkPred::DLPredictor< NetworkT, EdgeRndItT, ScoreRndItT, EdgeRndOutItT >, 174
  - ~DLPredictor, 178
  - DLPredictor, 177
  - Edge, 175
  - EdgeRndIt, 175
  - EdgeRndOutIt, 176
  - getName, 178
  - getNet, 178
  - init, 178
  - learn, 179
  - Network, 176
  - NodeID, 176
  - operator=, 179, 180
  - predict, 180
  - predictNeg, 180
  - score, 181
  - ScoreRndIt, 176
  - setName, 181
  - top, 182
- LinkPred::DNetwork< LabelT, NodeIDT, EdgeT >, 182
  - ~DNetwork, 188
  - addEdge, 188
  - addNode, 189
  - assemble, 189
  - compareEdgeEnd, 189
  - coupleAtOrd, 190
  - coupleOrd, 190
  - createEdgeMap, 190
  - createEdgeMapSP, 191
  - createNodeMap, 191
  - createNodeMapSP, 191
  - createNodeSMap, 192
  - createNodeSMapSP, 192
  - DNetwork, 187, 188
  - Edge, 185
  - EdgeIt, 185
  - EdgeMapSP, 186
  - edgesBegin, 192
  - edgesEnd, 193
  - end, 193
  - findLabel, 193
  - findNode, 194
  - getAvgDeg, 194
  - getAvgInDeg, 194
  - getAvgOutDeg, 194
  - getDeg, 195
  - getDegStat, 195
  - getID, 195
  - getInDeg, 196
  - getInDegStat, 196
  - getInOutDeg, 197
  - getLabel, 197
  - getMaxDeg, 197
  - getMaxInDeg, 197
  - getMaxOutDeg, 198
  - getMinDeg, 198
  - getMinInDeg, 198
  - getMinOutDeg, 198
  - getNbCouples, 199
  - getNbEdges, 199
  - getNbNodes, 199
  - getNbNonEdges, 199
  - getNbPaths, 200
  - getOutDeg, 200
  - getOutDegStat, 200
  - inEdgesBegin, 201
  - inEdgesEnd, 201
  - inNeighborsBegin, 201
  - inNeighborsEnd, 202
  - isEdge, 202
  - Label, 186
  - LabelIt, 186
  - labelsBegin, 203
  - labelsEnd, 203
  - makeEdge, 203
  - neighbBegin, 204
  - neighbEnd, 204
  - NodeID, 186
  - NodeIt, 186
  - NodeMapSP, 186
  - nodesBegin, 204
  - nodesDegBegin, 205
  - nodesDegEnd, 205
  - nodesEnd, 205
  - NodeSMapSP, 187
  - nonEdgesBegin, 205
  - nonEdgesEnd, 205
  - operator=, 206
  - outEdgesBegin, 206
  - outEdgesEnd, 207
  - outNeighborsBegin, 207
  - outNeighborsEnd, 207
  - print, 208
  - printEdges, 208
  - read, 208
  - readEdges, 209
  - reverseEdge, 209
  - rndEdgesBegin, 209
  - rndEdgesEnd, 210
  - rndNodesBegin, 210
  - rndNodesEnd, 210
  - rndNonEdgesBegin, 211
  - rndNonEdgesEnd, 211
  - shuffle, 211
  - start, 212



- write, 212
- LinkPred::DNetwork< LabelT, NodeIDT, EdgeT  
>::EdgeMap< ValueType >, 244
- ~EdgeMap, 246
- at, 247
- begin, 247
- cbegin, 247
- cend, 247
- EdgeMap, 246
- EdgeMapConstIt, 245
- EdgeMapIt, 245
- end, 248
- find, 248
- operator=, 249
- operator[], 249, 250
- size, 250
- LinkPred::DNetwork< LabelT, NodeIDT, EdgeT  
>::NodeDegIt, 474
- difference\_type, 475
- DNetwork, 483
- NodeDegIt, 476
- operator!=, 477
- operator<, 481
- operator<=, 481
- operator>, 482
- operator>=, 483
- operator\*, 477
- operator+, 477
- operator++, 478
- operator+=, 478
- operator-, 479
- operator->, 480
- operator--, 479, 480
- operator-=, 480
- operator=, 481, 482
- operator==, 482
- pointer, 476
- reference, 476
- LinkPred::DNetwork< LabelT, NodeIDT, EdgeT  
>::NodeMap< ValueType >, 499
- ~NodeMap, 501
- at, 502
- begin, 502
- cbegin, 502
- cend, 502
- end, 503
- NodeMap, 501
- NodeMapConstIt, 500
- NodeMapIt, 500
- operator=, 503
- operator[], 504
- LinkPred::DNetwork< LabelT, NodeIDT, EdgeT  
>::NodeSMap< ValueType >, 505
- ~NodeSMap, 507
- at, 507
- begin, 507
- cbegin, 508
- cend, 508
- end, 508
- find, 508
- NodeSMap, 506
- NodeSMapConstIterator, 506
- NodeSMapIterator, 506
- operator=, 509
- operator[], 509, 510
- size, 510
- LinkPred::DNetwork< LabelT, NodeIDT, EdgeT  
>::NonEdgeIt, 526
- difference\_type, 528
- DNetwork, 535
- NonEdgeIt, 528, 529
- operator!=, 529
- operator<, 533
- operator<=, 533
- operator>, 535
- operator>=, 535
- operator\*, 529
- operator+, 530
- operator++, 530
- operator+=, 530
- operator-, 531
- operator->, 533
- operator--, 532
- operator-=, 532
- operator=, 534
- operator==, 534
- pointer, 528
- reference, 528
- LinkPred::DNetwork< LabelT, NodeIDT, EdgeT  
>::RndEdgeIt, 641
- operator!=, 644
- operator\*, 644
- operator++, 645
- operator->, 645
- operator=, 645, 646
- operator==, 646
- pointer, 643
- reference, 643
- RndEdgeIt, 643, 644
- LinkPred::DNetwork< LabelT, NodeIDT, EdgeT  
>::RndNodeIt, 646
- operator!=, 649
- operator\*, 649
- operator++, 649, 650
- operator->, 650
- operator=, 650, 651
- operator==, 651
- pointer, 648
- reference, 648
- RndNodeIt, 648, 649
- LinkPred::DNetwork< LabelT, NodeIDT, EdgeT  
>::RndNonEdgeIt, 661
- operator!=, 664
- operator\*, 664
- operator++, 665
- operator->, 665

- operator=, 665, 666
- operator==, 666
- pointer, 663
- reference, 663
- RndNonEdgeIt, 663, 664
- LinkPred::DotProd, 212
  - ~DotProd, 214
  - DotProd, 213, 214
  - operator=, 214, 215
  - sim, 215
- LinkPred::DPATPredictor< Network, EdgeRndIt, ScoreRndIt, EdgeRndOutIt >, 215
  - ~DPATPredictor, 218
  - DPATPredictor, 217
  - init, 218
  - learn, 218
  - operator=, 219
  - predict, 219
  - score, 220
- LinkPred::DPSTPredictor< Network, EdgeRndIt, ScoreRndIt, EdgeRndOutIt >, 220
  - ~DPSTPredictor, 223
  - DPSTPredictor, 222, 223
  - init, 223
  - learn, 223
  - loadEdgeScores, 224
  - operator=, 224
  - score, 225
  - setEdgeScores, 225
- LinkPred::DSAPredictor< Network, EdgeRndIt, ScoreRndIt, EdgeRndOutIt >, 226
  - ~DSAPredictor, 228
  - DSAPredictor, 227, 228
  - init, 228
  - learn, 229
  - operator=, 229
  - predict, 230
  - score, 230
  - top, 231
- LinkPred::DSOIPredictor< Network, EdgeRndIt, ScoreRndIt, EdgeRndOutIt >, 231
  - ~DSOIPredictor, 234
  - DSOIPredictor, 233
  - init, 234
  - learn, 234
  - operator=, 234, 235
  - predict, 235
  - score, 236
  - top, 236
- LinkPred::Encoder< Network >, 254
  - ~Encoder, 257
  - CodeMap, 255
  - CodeMapSP, 255
  - Edge, 255
  - encode, 257
  - Encoder, 256
  - getDim, 257
  - getEdgeCode, 257, 258
  - getEdgeCodeDim, 258
  - getName, 258
  - getNodeCode, 258
  - getNodeCodeMap, 259
  - getWeightMap, 259
  - init, 259
  - NodeID, 255
  - operator=, 259, 260
  - setDim, 260
  - setName, 260
  - setWeightMap, 260
  - WeightMap, 255
  - WeightMapSP, 255
- LinkPred::ESPDistCalculator< Network, DistType, NbHopsType >, 262
  - ~ESPDistCalculator, 267
  - Edge, 264
  - EdgeLengthMap, 264
  - EdgeLengthMapSP, 264
  - ESPDistCalculator, 265, 267
  - getCacheHits, 268
  - getCacheMiss, 268
  - getDist, 268
  - getIndDist, 269
  - Label, 264
  - LengthMapIdType, 264
  - NetworkSP, 265
  - NodeDistMap, 265
  - NodeDistMapSP, 265
  - NodeID, 265
  - operator=, 269, 270
- LinkPred::ESPDSimCalculator< Network, DsimType, NbHopsType >, 270
  - ~ESPDSimCalculator, 275
  - Edge, 272
  - EdgeLengthMap, 272
  - EdgeLengthMapSP, 272
  - ESPDSimCalculator, 273, 275
  - getDist, 276
  - getIndDist, 276
  - Label, 272
  - LengthMapIdType, 272
  - NetworkSP, 273
  - NodeDsimMap, 273
  - NodeDsimMapSP, 273
  - NodeID, 273
  - operator=, 277
- LinkPred::ESPIndSimlCalculator< Network, DistType, NbHopsType >, 277
  - ~ESPIndSimlCalculator, 282
  - Edge, 279
  - EdgeLengthMap, 279
  - EdgeLengthMapSP, 279
  - ESPIndSimlCalculator, 281
  - getDirIndSiml, 282
  - getIndSiml, 282
  - Label, 280
  - LengthMapIdType, 280



- NetworkSP, 280
- NodeDistMap, 280
- NodeDistMapSP, 280
- NodeID, 280
- operator=, 283
- LinkPred::ESPLDistCalculator< Network, DistType, NbHopsType >, 284
  - ~ ESPLDistCalculator, 288
  - Edge, 285
  - EdgeLengthMap, 286
  - EdgeLengthMapSP, 286
  - ESPLDistCalculator, 287, 288
  - getDist, 289
  - getFinDistMapNoNeighb, 290
  - getIndDist, 290
  - getLim, 291
  - getMaxNbNodesInCache, 291
  - getSDistMap, 291
  - Label, 286
  - LengthMapIdType, 286
  - NetworkSP, 286
  - NodeDistMap, 286
  - NodeDistMapSP, 287
  - NodeID, 287
  - NodeSDistMap, 287
  - NodeSDistMapSP, 287
  - operator=, 292
  - setMaxNbNodesInCache, 292
- LinkPred::ESPLSimlCalculator< Network, DistType, NbHopsType >, 293
  - ~ ESPLSimlCalculator, 297
  - Edge, 295
  - EdgeLengthMap, 295
  - EdgeLengthMapSP, 295
  - ESPLSimlCalculator, 296, 297
  - getDirSiml, 298
  - getLim, 298
  - getMaxNbNodesInCache, 299
  - getNnzSimlMap, 299
  - getNnzSimlMapNoNeighb, 299
  - getSiml, 300
  - isUseHops, 300
  - Label, 295
  - LengthMapIdType, 295
  - NetworkSP, 295
  - NodeID, 296
  - NodeSDistMap, 296
  - NodeSDistMapSP, 296
  - operator=, 301
  - setMaxNbNodesInCache, 301
  - setUseHops, 302
- LinkPred::ESPSimlCalculator< Network, DistType, NbHopsType >, 302
  - ~ ESPSimlCalculator, 307
  - Edge, 304
  - EdgeLengthMap, 304
  - EdgeLengthMapSP, 304
  - ESPSimlCalculator, 306
  - getDirSiml, 307
  - getMaxNbNodesInCache, 308
  - getSiml, 308
  - Label, 304
  - LengthMapIdType, 305
  - NetworkSP, 305
  - NodeDistMap, 305
  - NodeDistMapSP, 305
  - NodeID, 305
  - operator=, 309
  - setMaxNbNodesInCache, 309
- LinkPred::FastSig< T >, 321
  - ~FastSig, 322
  - FastSig, 321, 322
  - operator(), 323
  - operator=, 323
- LinkPred::GCurve< PredResultsT >, 325
  - ~GCurve, 328
  - eval, 328, 329
  - GCurve, 327, 328
  - getCurve, 329, 330
  - getGCurve, 330
  - getGCurveAuc, 330
  - getThresholds, 331
  - operator=, 331, 332
  - ScoresItT, 326
- LinkPred::GFMatrix, 332
  - ~GFMatrix, 334
  - diag, 334
  - elemMult, 335
  - get, 335
  - getCol, 335
  - getCols, 336
  - getM, 336
  - getN, 336
  - getName, 336
  - getRow, 337
  - getRows, 337
  - GFMatrix, 333, 334
  - mult, 337, 338
  - operator!=, 338
  - operator\*, 342, 343
  - operator+, 344, 345
  - operator-, 345–347
  - operator/, 347
  - operator=, 338, 339
  - operator==, 339
  - print, 339
  - removeNaN, 340
  - set, 340
  - setCol, 340
  - setDiag, 341
  - setName, 341
  - setRow, 341
  - sum, 341
  - sumCols, 342
  - sumRows, 342

- LinkPred::GraphTraversal< Network, NodeProcessor  
    >, 348
  - ~GraphTraversal, 349
  - GraphTraversal, 348, 349
  - operator=, 350
  - traverse, 350
- LinkPred::HMSM< Network >, 351
  - ~HMSM, 353
  - encode, 353
  - getAlpha, 354
  - getDefaultDim, 354
  - getEps, 354
  - getHProb, 354
  - getLProb, 354
  - getNbMdsRuns, 355
  - getTol, 355
  - HMSM, 352, 353
  - init, 355
  - operator=, 355, 356
  - setAlpha, 356
  - setEps, 356
  - setHProb, 356
  - setNbMdsRuns, 357
  - setProb, 357
  - setTol, 357
  - setWeightMap, 358
- LinkPred::L1Sim, 361
  - ~L1Sim, 363
  - L1Sim, 362, 363
  - operator=, 363
  - sim, 364
- LinkPred::L2Sim, 364
  - ~L2Sim, 366
  - L2Sim, 365, 366
  - operator=, 366
  - sim, 367
- LinkPred::LargeVis< Network >, 367
  - ~LargeVis, 370
  - encode, 370
  - getDefaultDim, 370
  - getGamma, 371
  - getInitLR, 371
  - getNbNegSamples, 371
  - getNbSamples, 371
  - getNegSamplingPower, 371
  - getNegSize, 372
  - init, 372
  - LargeVis, 369, 370
  - operator=, 372
  - setGamma, 374
  - setInitLR, 374
  - setNbNegSamples, 374
  - setNbSamples, 374, 375
  - setNegSamplingPower, 375
  - setNegSize, 375
- LinkPred::LINE< Network >, 377
  - ~LINE, 379
  - encode, 379
  - getDefaultDim, 379
  - getInitLr, 380
  - getNbNegSamples, 380
  - getNegSamplingPower, 380
  - getNegSize, 380
  - getOrder, 381
  - getRecNet, 381
  - getRecWeightMap, 381
  - init, 381
  - isEnabledReconstruct, 381
  - LINE, 378, 379
  - operator=, 382
  - setEnabledReconstruct, 382
  - setInitLr, 383
  - setNbNegSamples, 383
  - setNegSamplingPower, 383
  - setNegSize, 383
  - setOrder, 384
- LinkPred::LMapQueue< K, P, KComparator, PComparator  
    >, 384
  - ~LMapQueue, 386
  - at, 387
  - begin, 387, 388
  - cbegin, 388
  - cend, 388
  - clear, 388
  - compareTop, 388
  - count, 389
  - empty, 389
  - end, 389
  - find, 390
  - getL, 390
  - LMapQueue, 385, 386
  - merge, 390
  - operator=, 390, 391
  - pop, 391
  - printPQ, 392
  - push, 392
  - size, 393
  - top, 393
- LinkPred::Log, 393
  - ~Log, 394
  - DefaultLogLevel, 395
  - DefaultOutputStream, 395
  - Log, 394
  - logLevel, 395
  - operator<<, 394
  - out, 395
- LinkPred::LogisticRegressor< InRndIt, OutRndIt, Score  
    RndIt >, 396
  - ~LogisticRegressor, 398
  - getLambda, 398
  - getTheta, 398
  - getTol, 399
  - learn, 399
  - LogisticRegressor, 397, 398
  - operator=, 399, 400
  - predict, 400

- setLambda, 400
  - setTol, 401
- LinkPred::LogMDSCG, 401
  - ~LogMDSCG, 403
  - f, 404
  - fgrad, 404
  - finalize, 404
  - grad, 405
  - init, 405
  - LogMDSCG, 402, 403
  - operator=, 405, 406
- LinkPred::LogRegCG< InRndIt, OutRndIt >, 406
  - ~LogRegCG, 409
  - f, 409
  - fgrad, 409
  - finalize, 410
  - getLambda, 410
  - grad, 410
  - init, 411
  - LogRegCG, 408
  - operator=, 411, 412
  - setLambda, 412
- LinkPred::LPSim, 412
  - ~LPSim, 414
  - getP, 414
  - LPSim, 413, 414
  - operator=, 415
  - setP, 415
  - sim, 416
- LinkPred::MatFact< Network >, 416
  - ~MatFact, 419
  - encode, 419
  - getDefaultDim, 419
  - getLambda, 419
  - getNegRatio, 419
  - getPosRatio, 420
  - getTol, 420
  - init, 420
  - MatFact, 418
  - operator=, 420, 421
  - setLambda, 421
  - setNegRatio, 421
  - setPosRatio, 421
  - setTol, 422
  - setWeightMap, 422
- LinkPred::MatFactCG, 423
  - ~MatFactCG, 425
  - f, 425
  - fgrad, 425
  - finalize, 426
  - grad, 426
  - init, 426
  - MatFactCG, 424
  - operator=, 427
- LinkPred::MatFactPbData, 427
  - i, 428
  - j, 428
  - target, 428
- LinkPred::MDS, 428
  - ~MDS, 429
  - cgMDS, 430
  - getAlg, 430
  - getNbRuns, 430
  - getTol, 431
  - MDS, 429
  - setAlg, 431
  - setNbRuns, 431
  - setTol, 431
  - solve, 432
- LinkPred::NetDistCalculator< Network, DistType, NbHopsType >, 433
  - ~NetDistCalculator, 435
  - Edge, 433
  - EdgeLengthMap, 434
  - EdgeLengthMapSP, 434
  - getDiscDist, 435
  - getDiscNbHops, 435
  - getDist, 436
  - getIndDist, 436
  - getMaxDist, 437
  - Label, 434
  - LengthMapIdType, 434
  - NetworkSP, 434
  - NodeDistMap, 434
  - NodeDistMapSP, 435
  - NodeId, 435
  - setDiscDist, 437
  - setDiscNbHops, 438
- LinkPred::NetIndSimlCalculator< Network, DistType, NbHopsType >, 438
  - ~NetIndSimlCalculator, 440
  - Edge, 439
  - EdgeLengthMap, 439
  - EdgeLengthMapSP, 439
  - getDirIndSiml, 440
  - getDiscDist, 441
  - getDiscNbHops, 441
  - getIndSiml, 441
  - getLambda, 442
  - getSelfSiml, 442
  - Label, 439
  - LengthMapIdType, 439
  - NetworkSP, 440
  - NodeId, 440
  - setDiscDist, 442
  - setDiscNbHops, 442
  - setLambda, 443
  - setSelfSiml, 443
- LinkPred::NetSimlCalculator< Network, DistType, NbHopsType >, 443
  - ~NetSimlCalculator, 446
  - Edge, 444
  - EdgeLengthMap, 445
  - EdgeLengthMapSP, 445
  - getDirSiml, 446
  - getDiscDist, 447

- getDiscNbHops, 447
- getLambda, 447
- getNnzSimlMap, 447
- getNnzSimlMapNoNeighb, 448
- getSelfSiml, 448
- getSiml, 448
- Label, 445
- LengthMapIdType, 445
- NetworkSP, 445
- NodeID, 445
- NodeSDistMap, 446
- NodeSDistMapSP, 446
- setDiscDist, 449
- setDiscNbHops, 449
- setLambda, 449
- setSelfSiml, 449
- LinkPred::NetworkManipulator< Network >, 450
  - ~NetworkManipulator, 453
  - createTestData, 453, 454
  - createTestDataAdd, 455
  - createTestDataRem, 456
  - createTestDataSeq, 457
  - createTestDataSeqInter, 458
  - Edge, 452
  - EdgeMap, 452
  - getAllNegLinksExcept, 459
  - getRndNegLinksExcept, 459
  - getRndPosLinksExcept, 459
  - isConnected, 460
  - Label, 452
  - loadTestData, 460
  - loadTestDataAdd, 462
  - loadTestDataRem, 462
  - NetworkCSP, 452
  - NetworkManipulator, 453
  - NetworkSP, 452
  - NodeID, 452
  - NodeMap, 453
  - rndConExtract, 463
  - rndExtract, 463
  - rst, 464
- LinkPred::Node2Vec< Network >, 464
  - ~Node2Vec, 467
  - encode, 467
  - getDefaultDim, 468
  - getInitLR, 468
  - getNbNegSamples, 468
  - getNbWalks, 468
  - getP, 469
  - getQ, 469
  - getStepInterval, 469
  - getSubSample, 469
  - getTotalSteps, 470
  - getWalkLength, 470
  - getWindowSize, 470
  - init, 470
  - Node2Vec, 466, 467
  - operator=, 470, 471
  - setInitLR, 471
  - setNbNegSamples, 471
  - setNbWalks, 471
  - setP, 472
  - setQ, 472
  - setStepInterval, 472
  - setSubSample, 473
  - setWalkLength, 473
  - setWeightMap, 473
  - setWindowSize, 473
- LinkPred::Pearson, 537
  - ~Pearson, 538
  - operator=, 539
  - Pearson, 538
  - sim, 539
- LinkPred::PEFactory< Network, LPredictorT, TestDataT, PerfMeasureT >, 540
  - ~PEFactory, 540
  - getPerfMeasures, 541
  - getPredictors, 541
- LinkPred::PerfCurve< PredResultsT >, 541
  - ~PerfCurve, 544
  - eval, 544, 545
  - getCurve, 545, 546
  - operator=, 546, 547
  - PerfCurve, 543, 544
  - ScoresItT, 543
- LinkPred::PerfEvalExpDescp< Network >, 547
  - fnRatio, 548
  - keepConnected, 548
  - nbTestRuns, 548
  - out, 548
  - ratioEnd, 548
  - ratioStart, 548
  - ratioStep, 548
  - refNet, 549
  - seed, 549
  - timingEnabled, 549
  - tnRatio, 549
- LinkPred::PerfEvalExp< Network, TestDataT, LPredictorT, PredResultsT, PerfMeasureT >, 549
  - ~PerfEvalExp, 551
  - getFactory, 552
  - getOutPrec, 552
  - getPed, 552
  - operator=, 552, 553
  - PerfEvalExp, 550, 551
  - resultsBegin, 553
  - resultsEnd, 553
  - run, 554
  - runNoTiming, 554
  - runTiming, 554
  - setOutPrec, 554
- LinkPred::PerfEvaluator< TestDataT, LPredictorT, PredResultsT, PerfMeasureT >, 555
  - ~PerfEvaluator, 557
  - addPerfMeasure, 557
  - addPredictor, 557

- eval, [559](#)
- evalNoTiming, [559](#)
- evalTiming, [559](#)
- getNbPerfMeasures, [559](#)
- getNbPredictors, [559](#)
- getPredictor, [560](#)
- isTimingEnabled, [560](#)
- operator=, [560](#), [561](#)
- PerfEvaluator, [556](#)
- resultsBegin, [561](#)
- resultsEnd, [561](#)
- setTimingEnabled, [562](#)
- LinkPred::PerfMeasure< PredResultsT >, [562](#)
  - ~PerfMeasure, [564](#)
  - eval, [565](#)
  - getName, [566](#)
  - operator=, [566](#)
  - PerfMeasure, [563](#), [564](#)
  - requiresNeg, [566](#)
  - requiresPos, [567](#)
  - requiresShuffling, [567](#)
  - ScoresItT, [563](#)
  - setName, [567](#)
- LinkPred::PR< PredResultsT >, [569](#)
  - ~PR, [572](#)
  - DGI, [571](#)
  - eval, [572](#), [573](#)
  - getCurve, [573](#), [574](#)
  - getInterpolMethod, [574](#)
  - getPRAuc, [574](#)
  - getPRAucDGI, [575](#)
  - getPRAucLIN, [576](#)
  - getPRCurve, [576](#)
  - getThresholds, [577](#)
  - InterpolMethod, [571](#)
  - LIN, [571](#)
  - operator=, [577](#)
  - PR, [571](#), [572](#)
  - ScoresItT, [571](#)
  - setInterpolMethod, [578](#)
- LinkPred::PredResults< TestDataT, LPredictorT, ScoresContainerT >, [614](#)
  - ~PredResults, [616](#)
  - compNegScores, [617](#)
  - compPosScores, [617](#)
  - compTopScores, [617](#)
  - getNbTop, [617](#)
  - getNegSortOrder, [618](#)
  - getPosSortOrder, [618](#)
  - getPredictor, [618](#)
  - getTestData, [618](#)
  - isNegComputed, [619](#)
  - isPosComputed, [619](#)
  - isTopComputed, [619](#)
  - negBegin, [619](#)
  - negEnd, [620](#)
  - negStrmBegin, [620](#)
  - negStrmEnd, [620](#)
  - operator=, [620](#), [622](#)
  - posBegin, [622](#)
  - posEnd, [622](#)
  - posStrmBegin, [622](#)
  - posStrmEnd, [623](#)
  - PredResults, [615](#), [616](#)
  - ScoresItT, [615](#)
  - sortNeg, [623](#)
  - sortPos, [623](#)
  - topBegin, [625](#)
  - topEdgesBegin, [625](#)
  - topEdgesEnd, [625](#)
  - topEnd, [625](#)
- LinkPred::PredResults< TestDataT, LPredictorT, ScoresContainerT >::ScoreIterator, [678](#)
  - difference\_type, [679](#)
  - operator!=, [682](#)
  - operator<, [686](#)
  - operator<=, [686](#)
  - operator>, [688](#)
  - operator>=, [688](#)
  - operator\*, [682](#)
  - operator+, [683](#)
  - operator++, [683](#)
  - operator+=, [683](#)
  - operator-, [684](#)
  - operator->, [686](#)
  - operator--, [685](#)
  - operator-=, [685](#)
  - operator=, [687](#)
  - operator==, [687](#)
  - pointer, [679](#)
  - PredResults, [688](#)
  - reference, [680](#)
  - ScoreIterator, [680](#), [682](#)
- LinkPred::RandomGen, [627](#)
  - ~RandomGen, [628](#)
  - getBool, [628](#)
  - getDouble, [628](#)
  - getGeo, [629](#)
  - getInt, [629](#)
  - getPL, [629](#)
  - getSeed, [630](#)
  - getSInt, [630](#)
  - getUInt, [630](#)
  - operator=, [631](#)
  - RandomGen, [627](#), [628](#)
- LinkPred::RndClassifier< InRndIt, OutRndIt, ScoreRndIt >, [632](#)
  - ~RndClassifier, [635](#)
  - learn, [635](#)
  - operator=, [635](#), [636](#)
  - predict, [636](#)
  - RndClassifier, [633](#)
- LinkPred::ROC< PredResultsT >, [667](#)
  - ~ROC, [670](#)
  - eval, [670](#), [671](#)
  - evalNoStream, [671](#)

- evalStream, 672
- getCurve, 672
- getROCAuc, 673
- getROCAucStrm, 673
- getROCCurve, 674
- getThresholds, 674
- isStrmEnabled, 675
- isStrmNeg, 675
- operator=, 675, 676
- ROC, 669, 670
- ScoresItT, 669
- setStrmEnabled, 676
- setStrmNeg, 676
- LinkPred::SimMeasure, 690
  - ~SimMeasure, 691
  - getName, 691
  - operator=, 691, 692
  - setName, 692
  - sim, 692
  - SimMeasure, 690, 691
- LinkPred::Simp, 47
- LinkPred::Simp::EdgeScore, 252
  - i, 252
  - j, 252
  - score, 252
- LinkPred::Simp::EdgeScoreByID, 253
  - i, 253
  - j, 253
  - score, 253
- LinkPred::Simp::Evaluator, 310
  - ~Evaluator, 311
  - addADA, 311
  - addCNE, 312
  - addCRA, 312
  - addECL, 312
  - addESM, 313
  - addFBM, 313
  - addHDI, 314
  - addHPI, 314
  - addHRG, 314
  - addHYP, 315
  - addJID, 315
  - addKAB, 315
  - addLCP, 316
  - addLHN, 316
  - addPAT, 316
  - addPR, 316
  - addPST, 317
  - addRAL, 317
  - addRND, 317
  - addROC, 318
  - addSAI, 318
  - addSBM, 318
  - addSHP, 318
  - addSOI, 319
  - addTPR, 319
  - Evaluator, 311
  - genTestData, 319
  - getPerfRes, 320
  - run, 320
  - LinkPred::Simp::Evaluator::Factory::ECLParams, 237
    - classifierName, 237
    - dim, 237
    - encoderName, 237
    - negRatio, 237
    - posRatio, 238
    - seed, 238
  - LinkPred::Simp::Evaluator::Factory::ESMParams, 261
    - dim, 261
    - encoderName, 261
    - seed, 262
    - simMeasureName, 262
  - LinkPred::Simp::Evaluator::Factory::FBMParams, 324
    - maxIter, 324
    - seed, 324
  - LinkPred::Simp::Evaluator::Factory::HRGParams, 358
    - nbBeans, 358
    - nbSamples, 359
    - seed, 359
  - LinkPred::Simp::Evaluator::Factory::HYPPParams, 359
    - gamma, 359
    - L, 360
    - m, 360
    - seed, 360
    - T, 360
    - zeta, 360
  - LinkPred::Simp::Evaluator::Factory::KABParams, 360
    - horizLim, 361
  - LinkPred::Simp::Evaluator::Factory::LCPPParams, 376
    - epsilon, 376
  - LinkPred::Simp::Evaluator::Factory::PSTParams, 626
    - fileName, 626
  - LinkPred::Simp::Evaluator::Factory::RNDParams, 666
    - seed, 667
  - LinkPred::Simp::Evaluator::Factory::SBMParams, 677
    - maxIter, 677
    - seed, 677
  - LinkPred::Simp::Evaluator::Factory::SHPPParams, 689
    - seed, 689
  - LinkPred::Simp::PerfRes, 568
    - name, 568
    - res, 568
  - LinkPred::Simp::Predictor, 578
    - ~Predictor, 581
    - getID, 581
    - getLabel, 581
    - getNbNodes, 582
    - isEdgeByID, 582
    - isEdgeByLabel, 582
    - loadnet, 583
    - predADA, 583
    - predAllADA, 583
    - predAllADABYID, 583
    - predAllCNE, 584
    - predAllCNEBYID, 584
    - predAllCRA, 584

- predAllCRABByID, [584](#)
- predAllECL, [585](#)
- predAllECLByID, [585](#)
- predAllESM, [586](#)
- predAllESMByID, [586](#)
- predAllFBM, [587](#)
- predAllFBMByID, [587](#)
- predAllHDI, [589](#)
- predAllHDIByID, [589](#)
- predAllHPI, [589](#)
- predAllHPIByID, [589](#)
- predAllHRG, [590](#)
- predAllHRGByID, [590](#)
- predAllHYP, [591](#)
- predAllHYPByID, [591](#)
- predAllJID, [592](#)
- predAllJIDByID, [592](#)
- predAllKAB, [592](#)
- predAllKABByID, [592](#)
- predAllLCP, [593](#)
- predAllLCPByID, [593](#)
- predAllLHN, [594](#)
- predAllLHNByID, [594](#)
- predAllPAT, [594](#)
- predAllPATByID, [594](#)
- predAllRAL, [594](#)
- predAllRALByID, [595](#)
- predAllRND, [595](#)
- predAllRNDByID, [595](#)
- predAllSAI, [596](#)
- predAllSAIByID, [596](#)
- predAllSBM, [596](#)
- predAllSBMByID, [597](#)
- predAllSHP, [597](#)
- predAllSHPByID, [597](#)
- predAllSOI, [598](#)
- predAllSOIByID, [598](#)
- predCNE, [598](#)
- predCRA, [598](#)
- predECL, [599](#)
- predESM, [599](#)
- predFBM, [600](#)
- predHDI, [600](#)
- predHPI, [600](#)
- predHRG, [601](#)
- predHYP, [601](#)
- Predictor, [580](#)
- predJID, [602](#)
- predKAB, [602](#)
- predLCP, [602](#)
- predLHN, [603](#)
- predPAT, [603](#)
- predRAL, [603](#)
- predRND, [603](#)
- predSAI, [604](#)
- predSBM, [604](#)
- predSHP, [604](#)
- predSOI, [605](#)
- predTopADA, [605](#)
- predTopCNE, [605](#)
- predTopCRA, [606](#)
- predTopECL, [606](#)
- predTopESM, [607](#)
- predTopFBM, [607](#)
- predTopHDI, [608](#)
- predTopHPI, [608](#)
- predTopHRG, [608](#)
- predTopHYP, [609](#)
- predTopJID, [609](#)
- predTopKAB, [610](#)
- predTopLCP, [610](#)
- predTopLHN, [611](#)
- predTopPAT, [611](#)
- predTopRAL, [611](#)
- predTopRND, [612](#)
- predTopSAI, [612](#)
- predTopSBM, [612](#)
- predTopSHP, [613](#)
- predTopSOI, [613](#)
- LinkPred::TestData< Network, EdgeContT >, [693](#)
  - ~TestData, [697](#)
  - ECEIT, [696](#)
  - Edge, [694](#)
  - Edgelt, [695](#)
  - genNeg, [698](#)
  - genPos, [698](#)
  - getEg, [698](#)
  - getNbNeg, [698](#)
  - getNbPos, [698](#)
  - getNegClass, [699](#)
  - getObsNet, [699](#)
  - getPosClass, [699](#)
  - getRefNet, [699](#)
  - getRemLinksMap, [700](#)
  - isLocked, [700](#)
  - isTnGenerated, [700](#)
  - isTpGenerated, [700](#)
  - IteratorType, [695](#)
  - lock, [701](#)
  - negBegin, [701](#)
  - negEnd, [701](#)
  - negStrmBegin, [701](#)
  - negStrmEnd, [702](#)
  - NetworkCSP, [695](#)
  - NetworkSP, [695](#)
  - NonEdgelt, [695](#)
  - operator=, [702](#)
  - posBegin, [703](#)
  - posEnd, [703](#)
  - posStrmBegin, [703](#)
  - posStrmEnd, [703](#)
  - TestData, [696](#), [697](#)
  - TNEIT, [696](#)
  - TPEIT, [696](#)
- LinkPred::TestData< Network, EdgeContT >::TestEdgelt, [709](#)



- difference\_type, 711
- operator!=, 712
- operator<, 716
- operator<=, 716
- operator>, 718
- operator>=, 718
- operator\*, 713
- operator+, 713
- operator++, 713, 714
- operator+=, 714
- operator-, 714, 715
- operator->, 716
- operator--, 715
- operator-=, 715
- operator=, 717
- operator==, 717
- pointer, 711
- reference, 711
- TestData, 719
- TestEdgelt, 711, 712
- LinkPred::TestEdgeGen< Network, EdgeContT >, 704
  - ~TestEdgeGen, 706
  - generateTN, 706
  - generateTP, 707
  - operator=, 707
  - TestEdgeGen, 705, 706
  - tnBegin, 708
  - tnEnd, 708
  - tpBegin, 708
  - tpEnd, 708
- LinkPred::TestEdgeGen< Network, EdgeContT >::TNEdgelt, 719
  - difference\_type, 721
  - operator!=, 722
  - operator<, 726
  - operator<=, 726
  - operator>, 728
  - operator>=, 728
  - operator\*, 722
  - operator+, 723
  - operator++, 723
  - operator+=, 723
  - operator-, 724
  - operator->, 726
  - operator--, 725
  - operator-=, 725
  - operator=, 727
  - operator==, 727
  - pointer, 721
  - reference, 721
  - TestEdgeGen, 728
  - TNEdgelt, 721, 722
- LinkPred::TestEdgeGen< Network, EdgeContT >::TPEdgelt, 729
  - difference\_type, 730
  - operator!=, 732
  - operator<, 735
  - operator<=, 736
  - operator>, 737
  - operator>=, 737
  - operator\*, 732
  - operator+, 732
  - operator++, 733
  - operator+=, 733
  - operator-, 734
  - operator->, 735
  - operator--, 734, 735
  - operator-=, 735
  - operator=, 736
  - operator==, 737
  - pointer, 730
  - reference, 731
  - TestEdgeGen, 738
  - TPEdgelt, 731
- LinkPred::TPR< PredResultsT >, 738
  - ~TPR, 741
  - eval, 741, 742
  - evalUsingPredict, 742
  - evalUsingTop, 743
  - getTPR, 743
  - isUseTopMethod, 743
  - operator=, 744
  - requiresNeg, 744
  - requiresShuffling, 744
  - ScoresItT, 740
  - setUseTopMethod, 745
  - TPR, 740, 741
- LinkPred::UADAPredictor< Network, EdgeRndIt, ScoreRndIt, EdgeRndOutIt >, 745
  - ~UADAPredictor, 748
  - init, 748
  - learn, 748
  - operator=, 748, 749
  - predict, 749
  - score, 749
  - top, 750
  - UADAPredictor, 747
- LinkPred::UCNEPredictor< Network, EdgeRndIt, ScoreRndIt, EdgeRndOutIt >, 751
  - ~UCNEPredictor, 753
  - init, 753
  - learn, 753
  - operator=, 754
  - predict, 754
  - score, 755
  - top, 755
  - UCNEPredictor, 752, 753
- LinkPred::UCRAPredictor< Network, EdgeRndIt, ScoreRndIt, EdgeRndOutIt >, 756
  - ~UCRAPredictor, 759
  - init, 759
  - learn, 759
  - operator=, 759, 760
  - predict, 760
  - score, 760
  - top, 761



- UCRAPredictor, 758
- LinkPred::UCSTPredictor< Network, EdgeRndIt, ScoreRndIt, EdgeRndOutIt >, 762
  - ~UCSTPredictor, 765
  - init, 765
  - learn, 765
  - operator=, 766
  - predict, 766
  - score, 767
  - top, 767
- UCSTPredictor, 763, 765
- LinkPred::UECLPredictor< Network, EdgeRndIt, ScoreRndIt, EdgeRndOutIt >, 768
  - ~UECLPredictor, 771
  - getClassifier, 771
  - getEncoder, 771
  - getNegRatio, 771
  - getPosRatio, 772
  - init, 772
  - learn, 772
  - operator=, 772, 773
  - score, 773
  - setClassifier, 774
  - setEncoder, 774
  - setNegRatio, 774
  - setPosRatio, 775
- UECLPredictor, 770
- LinkPred::UESMPredictor< Network, EdgeRndIt, ScoreRndIt, EdgeRndOutIt >, 775
  - ~UESMPredictor, 778
  - getEncoder, 778
  - getSimMeasure, 778
  - init, 778
  - learn, 779
  - operator=, 779
  - score, 780
  - setEncoder, 780
  - setSimMeasure, 780
- UESMPredictor, 777
- LinkPred::UFBMPredictor< Network, EdgeRndIt, ScoreRndIt, EdgeRndOutIt >, 781
  - ~UFBMPredictor, 783
  - getMaxIter, 784
  - init, 784
  - learn, 784
  - operator=, 784, 785
  - predict, 785
  - score, 785
  - setMaxIter, 786
- UFBMPredictor, 782, 783
- LinkPred::UHDIPredictor< Network, EdgeRndIt, ScoreRndIt, EdgeRndOutIt >, 786
  - ~UHDIPredictor, 789
  - init, 789
  - learn, 789
  - operator=, 789, 790
  - predict, 790
  - score, 791
  - top, 791
- UHDIPredictor, 788
- LinkPred::UHPIPredictor< Network, EdgeRndIt, ScoreRndIt, EdgeRndOutIt >, 792
  - ~UHPIPredictor, 794
  - init, 794
  - learn, 794
  - operator=, 795
  - predict, 795
  - score, 796
  - top, 796
- UHPIPredictor, 793, 794
- LinkPred::UHRGPredictor< Network, EdgeRndIt, ScoreRndIt, EdgeRndOutIt >, 797
  - ~UHRGPredictor, 799
  - getNbBeans, 800
  - getNbSamples, 800
  - init, 800
  - learn, 800
  - operator=, 801
  - predict, 801
  - score, 802
  - setNbBeans, 802
  - setNbSamples, 802
- UHRGPredictor, 799
- LinkPred::UHYPPredictor< Network, EdgeRndIt, ScoreRndIt, EdgeRndOutIt >, 803
  - ~UHYPPredictor, 805
  - getGamma, 806
  - getL, 806
  - getM, 806
  - getSeed, 806
  - getT, 807
  - getZeta, 807
  - init, 807
  - learn, 807
  - operator=, 808
  - predict, 808
  - score, 809
  - setGamma, 809
  - setL, 810
  - setM, 810
  - setT, 810
  - setZeta, 811
- UHYPPredictor, 804, 805
- LinkPred::UJIDPredictor< Network, EdgeRndIt, ScoreRndIt, EdgeRndOutIt >, 811
  - ~UJIDPredictor, 814
  - init, 814
  - learn, 814
  - operator=, 814, 815
  - predict, 815
  - score, 815
  - top, 816
- UJIDPredictor, 813
- LinkPred::UKABPredictor< Network, EdgeRndIt, ScoreRndIt, EdgeRndOutIt >, 817
  - ~UKABPredictor, 820

- Edge, 818
- getCacheLevel, 820
- getHorizLim, 820
- init, 820
- learn, 821
- NodeID, 818
- operator=, 821
- predict, 822
- score, 822
- setCacheLevel, 823
- setHorizLim, 823
- top, 823
- UKABPredictor, 819
- LinkPred::ULCPPredictor< Network, EdgeRndIt, ScoreRndIt, EdgeRndOutIt >, 824
  - ~ULCPPredictor, 826
  - getEpsilon, 826
  - init, 827
  - learn, 827
  - operator=, 827, 828
  - predict, 828
  - score, 828
  - setEpsilon, 829
  - ULCPPredictor, 825, 826
- LinkPred::ULHNPredictor< Network, EdgeRndIt, ScoreRndIt, EdgeRndOutIt >, 829
  - ~ULHNPredictor, 832
  - init, 832
  - learn, 832
  - operator=, 832, 833
  - predict, 833
  - score, 834
  - top, 834
  - ULHNPredictor, 831
- LinkPred::ULPredictor< NetworkT, EdgeRndItT, ScoreRndItT, EdgeRndOutItT >, 835
  - ~ULPredictor, 838
  - Edge, 836
  - EdgeRndIt, 836
  - EdgeRndOutIt, 836
  - getName, 838
  - getNet, 839
  - init, 839
  - learn, 839
  - Network, 836
  - NodeID, 837
  - operator=, 840
  - predict, 841
  - predictNeg, 841
  - score, 842
  - ScoreRndIt, 837
  - setName, 842
  - top, 842
  - ULPredictor, 837, 838
- LinkPred::UMPSPredictor< Network, EdgeRndIt, ScoreRndIt, EdgeRndOutIt >, 843
  - ~UMPSPredictor, 848
  - EdgeLengthMethod, 846
  - getAsp, 848
  - getCacheLevel, 848
  - getEdgeLengthMethod, 848
  - getLambda, 849
  - getLambdaMethod, 849
  - getLambdaNegEstRatio, 849
  - getLambdaPosEstRatio, 849
  - getLambdaStep, 850
  - getLandmarkRatio, 850
  - getLandmarkStrategy, 850
  - getLength, 850
  - getMaxLambda, 851
  - getMinLambda, 851
  - getNegScore, 851
  - getPerfMeasure, 851
  - getPosScore, 852
  - getTol, 852
  - Hub, 847
  - IHub, 847
  - init, 852
  - LambdaMethod, 846
  - LandmarkStrategy, 846
  - learn, 852
  - MeanApp, 846
  - operator=, 853
  - Opt, 846
  - PAT, 846
  - predict, 853
  - RA1, 846
  - RA2, 846
  - Random, 847
  - Scan, 846
  - score, 854
  - setAsp, 854
  - setCacheLevel, 855
  - setEdgeLengthMethod, 855
  - setLambda, 855
  - setLambdaMethod, 856
  - setLambdaNegEstRatio, 856
  - setLambdaPosEstRatio, 856
  - setLambdaStep, 858
  - setLandmarkRatio, 858
  - setLandmarkStrategy, 858
  - setMaxLambda, 859
  - setMinLambda, 859
  - setNegScore, 859
  - setPerfMeasure, 860
  - setPosScore, 860
  - setTol, 860
  - UMPSPredictor, 847
  - User, 846
- LinkPred::UNEDPredictor< Network, EdgeRndIt, ScoreRndIt, EdgeRndOutIt >, 861
  - ~UNEDPredictor, 864
  - Edge, 862
  - init, 864
  - learn, 864
  - NodeID, 862

- operator=, 864, 865
- predict, 865
- score, 866
- top, 866
- UNEDPredictor, 863
- LinkPred::UNetwork< LabelT, NodeIDT, EdgeT >, 867
  - ~UNetwork, 872
  - addEdge, 872
  - addNode, 873
  - assemble, 873
  - compareEdgeEnd, 873
  - coupleAtOrd, 874
  - coupleOrd, 874
  - createEdgeMap, 874
  - createEdgeMapSP, 875
  - createNodeMap, 875
  - createNodeMapSP, 875
  - createNodeSMap, 876
  - createNodeSMapSP, 876
  - Edge, 870
  - EdgeIt, 870
  - EdgeMapSP, 870
  - edgesBegin, 877
  - edgesEnd, 877
  - end, 877
  - findLabel, 877
  - findNode, 878
  - generateERN, 878
  - generateREG, 879
  - generateRNC, 879
  - getAvgDeg, 879
  - getCC, 880
  - getCommonNeighbors, 880, 881
  - getCSR, 881
  - getDeg, 881
  - getDegStat, 882
  - getID, 882
  - getLabel, 882
  - getMaxDeg, 883
  - getMinDeg, 883
  - getNbCommonNeighbors, 883
  - getNbCouples, 884
  - getNbEdges, 884
  - getNbInEdges, 884
  - getNbNodes, 884
  - getNbNonEdges, 885
  - getNbPaths, 885
  - isEdge, 885, 886
  - Label, 870
  - LabelIt, 870
  - labelsBegin, 886
  - labelsEnd, 886
  - makeEdge, 887
  - neighbBegin, 887
  - neighbEnd, 887
  - NodeID, 870
  - NodeIt, 871
  - NodeMapSP, 871
  - nodesBegin, 888
  - nodesDegBegin, 888
  - nodesDegEnd, 888
  - nodesEnd, 888
  - NodeSMapSP, 871
  - nonEdgesBegin, 889
  - nonEdgesEnd, 889
  - operator=, 889, 890
  - print, 890
  - printEdges, 890
  - read, 890
  - readEdges, 891
  - reverseEdge, 891
  - rndEdgesBegin, 892
  - rndEdgesEnd, 892
  - rndNodesBegin, 892
  - rndNodesEnd, 893
  - rndNonEdgesBegin, 893
  - rndNonEdgesEnd, 893
  - shuffle, 893
  - start, 894
  - UNetwork, 871, 872
  - write, 894
- LinkPred::UNetwork< LabelT, NodeIDT, EdgeT >::EdgeMap< ValueType >, 238
  - ~EdgeMap, 240
  - at, 240
  - begin, 241
  - cbegin, 241
  - cend, 241
  - EdgeMap, 239, 240
  - EdgeMapConstIt, 239
  - EdgeMapIt, 239
  - end, 241
  - find, 242
  - operator=, 242, 243
  - operator[], 243
  - size, 244
- LinkPred::UNetwork< LabelT, NodeIDT, EdgeT >::NodeDegIt, 484
  - difference\_type, 485
  - NodeDegIt, 486
  - operator!=, 486
  - operator<, 490
  - operator<=, 491
  - operator>, 493
  - operator>=, 493
  - operator\*, 487
  - operator+, 487
  - operator++, 487, 488
  - operator+=, 488
  - operator-, 488, 489
  - operator->, 490
  - operator--, 489
  - operator-=, 490
  - operator=, 491
  - operator==, 493
  - pointer, 485

- reference, 485
- UNetwork, 494
- LinkPred::UNetwork< LabelT, NodeIDT, EdgeT  
>::NodeMap< ValueType >, 494
- ~NodeMap, 496
- at, 496
- begin, 497
- cbegin, 497
- cend, 497
- end, 497
- NodeMap, 495, 496
- NodeMapConstIt, 495
- NodeMapIt, 495
- operator=, 498
- operator[], 498, 499
- LinkPred::UNetwork< LabelT, NodeIDT, EdgeT  
>::NodeSMap< ValueType >, 510
- ~NodeSMap, 513
- at, 513
- begin, 513
- cbegin, 513
- cend, 514
- end, 514
- find, 514
- NodeSMap, 512
- NodeSMapConstIterator, 511
- NodeSMapIterator, 512
- operator=, 515
- operator[], 515, 516
- size, 516
- LinkPred::UNetwork< LabelT, NodeIDT, EdgeT  
>::NonEdgIt, 517
- difference\_type, 518
- NonEdgIt, 519
- operator!=, 520
- operator<, 523
- operator<=, 524
- operator>, 525
- operator>=, 525
- operator\*, 520
- operator+, 520
- operator++, 521
- operator+=, 521
- operator-, 522
- operator->, 523
- operator--, 522, 523
- operator-=, 523
- operator=, 524
- operator==, 525
- pointer, 518
- reference, 519
- UNetwork, 526
- LinkPred::UNetwork< LabelT, NodeIDT, EdgeT  
>::RndEdgIt, 636
- operator!=, 639
- operator\*, 639
- operator++, 640
- operator->, 640
- operator=, 640, 641
- operator==, 641
- pointer, 638
- reference, 638
- RndEdgIt, 638, 639
- LinkPred::UNetwork< LabelT, NodeIDT, EdgeT  
>::RndNodeIt, 651
- operator!=, 654
- operator\*, 654
- operator++, 654, 655
- operator->, 655
- operator=, 655, 656
- operator==, 656
- pointer, 653
- reference, 653
- RndNodeIt, 653, 654
- LinkPred::UNetwork< LabelT, NodeIDT, EdgeT  
>::RndNonEdgIt, 656
- operator!=, 659
- operator\*, 659
- operator++, 660
- operator->, 660
- operator=, 660, 661
- operator==, 661
- pointer, 658
- reference, 658
- RndNonEdgIt, 658, 659
- LinkPred::UPATPredictor< Network, EdgeRndIt, ScoreRndIt, EdgeRndOutIt >, 895
- ~UPATPredictor, 897
- init, 897
- learn, 897
- operator=, 898
- predict, 898
- score, 899
- top, 899
- UPATPredictor, 896, 897
- LinkPred::UPSTPredictor< Network, EdgeRndIt, ScoreRndIt, EdgeRndOutIt >, 900
- ~UPSTPredictor, 903
- init, 903
- learn, 903
- loadEdgeScores, 903
- operator=, 904
- score, 904
- setEdgeScores, 905
- UPSTPredictor, 902
- LinkPred::URALPredictor< Network, EdgeRndIt, ScoreRndIt, EdgeRndOutIt >, 905
- ~URALPredictor, 908
- init, 908
- learn, 908
- operator=, 908, 909
- predict, 909
- score, 910
- top, 910
- URALPredictor, 907

- LinkPred::URNDPredictor< Network, EdgeRndIt, ScoreRndIt, EdgeRndOutIt >, [911](#)
  - ~URNDPredictor, [913](#)
  - init, [913](#)
  - learn, [913](#)
  - operator=, [914](#)
  - predict, [914](#)
  - score, [915](#)
  - URNDPredictor, [912](#), [913](#)
- LinkPred::USAIPredictor< Network, EdgeRndIt, ScoreRndIt, EdgeRndOutIt >, [915](#)
  - ~USAIPredictor, [919](#)
  - init, [919](#)
  - learn, [919](#)
  - operator=, [919](#), [920](#)
  - predict, [920](#)
  - score, [921](#)
  - top, [921](#)
  - USAIPredictor, [918](#)
- LinkPred::USBMPredictor< Network, EdgeRndIt, ScoreRndIt, EdgeRndOutIt >, [922](#)
  - ~USBMPredictor, [924](#)
  - getMaxIter, [924](#)
  - init, [924](#)
  - learn, [925](#)
  - operator=, [925](#)
  - predict, [926](#)
  - score, [926](#)
  - setMaxIter, [927](#)
  - USBMPredictor, [923](#), [924](#)
- LinkPred::USHPPredictor< Network, EdgeRndIt, ScoreRndIt, EdgeRndOutIt >, [927](#)
  - ~USHPPredictor, [930](#)
  - getAsp, [930](#)
  - getCacheLevel, [931](#)
  - getLandmarkRatio, [931](#)
  - getLandmarkStrategy, [931](#)
  - Hub, [929](#)
  - IHub, [929](#)
  - init, [931](#)
  - LandmarkStrategy, [929](#)
  - learn, [932](#)
  - operator=, [932](#)
  - predict, [933](#)
  - Random, [929](#)
  - score, [933](#)
  - setAsp, [934](#)
  - setCacheLevel, [934](#)
  - setLandmarkRatio, [934](#)
  - setLandmarkStrategy, [935](#)
  - USHPPredictor, [929](#), [930](#)
- LinkPred::USOIPredictor< Network, EdgeRndIt, ScoreRndIt, EdgeRndOutIt >, [935](#)
  - ~USOIPredictor, [938](#)
  - init, [938](#)
  - learn, [938](#)
  - operator=, [938](#), [939](#)
  - predict, [939](#)
  - score, [939](#)
  - top, [940](#)
  - USOIPredictor, [937](#)
- LinkPred::USUMPredictor< Network, EdgeRndIt, ScoreRndIt, EdgeRndOutIt >, [941](#)
  - ~USUMPredictor, [943](#)
  - init, [943](#)
  - learn, [943](#)
  - operator=, [944](#)
  - predict, [944](#)
  - score, [945](#)
  - top, [945](#)
  - USUMPredictor, [942](#), [943](#)
- LinkPred::Utils, [47](#)
  - assertNoNaN, [48](#)
  - clear, [49](#)
  - filter, [49](#)
  - flip, [49](#)
  - flipMap, [50](#)
  - getRandom, [50](#)
  - getRndPerm, [50](#)
  - int\_cast, [51](#)
  - localRange, [51](#)
  - ltrim, [51](#)
  - norm, [52](#)
  - plFit, [52](#)
  - print, [53](#)
  - printEdges, [53](#), [54](#)
  - readEdges, [54](#)
  - readEdgeScores, [54](#)
  - rtrim, [55](#)
  - selectRandom, [55](#)
  - selectRandomInPlace, [55](#)
  - selectTopK, [56](#)
  - shuffle, [56](#)
  - sort, [56](#)
  - trim, [57](#)
  - writeEdgeScores, [57](#)
- LinkPred::Utils::EdgeScore< Label >, [251](#)
  - i, [251](#)
  - j, [251](#)
  - score, [251](#)
- LinkPred::Utils::PairCompRight< FirstT, SecondT, CompareT >, [536](#)
  - operator(), [536](#)
- LinkPred::Vec, [946](#)
  - ~Vec, [950](#)
  - amax, [950](#)
  - amin, [951](#)
  - axpy, [951](#)
  - center, [952](#)
  - find, [952](#)
  - findNz, [952](#)
  - getValues, [952](#)
  - ifmax, [953](#)
  - ifmin, [953](#)
  - ilmax, [953](#)
  - ilmin, [953](#)

- imax, [953](#)
- imin, [954](#)
- isConstant, [954](#)
- makeConstant, [954](#)
- max, [954](#), [955](#)
- mean, [955](#)
- min, [955](#), [956](#)
- norm, [956](#)
- operator!=, [957](#)
- operator\*, [963–965](#)
- operator<sup>^</sup>, [969](#)
- operator+, [965](#), [966](#)
- operator-, [966](#), [967](#)
- operator/, [967](#), [968](#)
- operator=, [957](#)
- operator==, [957](#)
- operator[], [958](#)
- partScale, [959](#)
- print, [959](#), [960](#)
- read, [960](#)
- reset, [960](#), [961](#)
- resize, [961](#)
- scale, [961](#)
- scatter, [962](#)
- setConstant, [962](#)
- size, [962](#)
- sum, [962](#)
- Vec, [948–950](#)
- write, [963](#)
- LMapQueue
  - LinkPred::LMapQueue< K, P, KComparator, PComparator >, [385](#), [386](#)
- loadEdgeScores
  - LinkPred::DPSTPredictor< Network, EdgeRndIt, ScoreRndIt, EdgeRndOutIt >, [224](#)
  - LinkPred::UPSTPredictor< Network, EdgeRndIt, ScoreRndIt, EdgeRndOutIt >, [903](#)
- loadnet
  - LinkPred::Simp::Predictor, [583](#)
- loadTestData
  - LinkPred::NetworkManipulator< Network >, [460](#)
- loadTestDataAdd
  - LinkPred::NetworkManipulator< Network >, [462](#)
- loadTestDataRem
  - LinkPred::NetworkManipulator< Network >, [462](#)
- localRange
  - LinkPred::Utils, [51](#)
- lock
  - LinkPred::TestData< Network, EdgeContT >, [701](#)
- Log
  - LinkPred::Log, [394](#)
- log.hpp
  - logger, [1128](#)
- logDebug
  - LinkPred, [40](#)
- logDebug1
  - LinkPred, [40](#)
- logDebug2
  - LinkPred, [40](#)
- logDebug3
  - LinkPred, [40](#)
- logError
  - LinkPred, [40](#)
- logger
  - log.hpp, [1128](#)
- logInfo
  - LinkPred, [40](#)
- LogisticRegressor
  - LinkPred::LogisticRegressor< InRndIt, OutRndIt, ScoreRndIt >, [397](#), [398](#)
- LogLevel
  - LinkPred, [39](#)
- logLevel
  - LinkPred::Log, [395](#)
- LogMDSCG
  - LinkPred::LogMDSCG, [402](#), [403](#)
- LogRegCG
  - LinkPred::LogRegCG< InRndIt, OutRndIt >, [408](#)
- logWarning
  - LinkPred, [40](#)
- LPSim
  - LinkPred::LPSim, [413](#), [414](#)
- ltrim
  - LinkPred::Utils, [51](#)
- m
  - LinkPred::Simp::Evaluator::Factory::HYPParams, [360](#)
- Machine learning classes, [25](#)
- makeConstant
  - LinkPred::Vec, [954](#)
- makeEdge
  - LinkPred::DNetwork< LabelT, NodeIDT, EdgeT >, [203](#)
  - LinkPred::UNetwork< LabelT, NodeIDT, EdgeT >, [887](#)
- MatFact
  - LinkPred::MatFact< Network >, [418](#)
- MatFactCG
  - LinkPred::MatFactCG, [424](#)
- MathPI
  - LinkPred, [46](#)
- max
  - LinkPred::Vec, [954](#), [955](#)
- maxIter
  - LinkPred::Simp::Evaluator::Factory::FBMPParams, [324](#)
  - LinkPred::Simp::Evaluator::Factory::SBMPParams, [677](#)
- MDS
  - LinkPred::MDS, [429](#)
- MDSAlg
  - LinkPred, [40](#)
- mean
  - LinkPred::Vec, [955](#)
- MeanApp

- LinkPred::UMPSPredictor< Network, EdgeRndIt, ScoreRndIt, EdgeRndOutIt >, [846](#)
- merge
  - LinkPred::LMapQueue< K, P, KComparator, PComparator >, [390](#)
- min
  - LinkPred::Vec, [955](#), [956](#)
- mult
  - LinkPred::GFMatrix, [337](#), [338](#)
- name
  - LinkPred::Simp::PerfRes, [568](#)
- nbBeans
  - LinkPred::Simp::Evaluator::Factory::HRGParams, [358](#)
- nbSamples
  - LinkPred::Simp::Evaluator::Factory::HRGParams, [359](#)
- nbTestRuns
  - LinkPred::PerfEvalExpDescp< Network >, [548](#)
- negBegin
  - LinkPred::PredResults< TestDataT, LPredictorT, ScoresContainerT >, [619](#)
  - LinkPred::TestData< Network, EdgeContT >, [701](#)
- negEnd
  - LinkPred::PredResults< TestDataT, LPredictorT, ScoresContainerT >, [620](#)
  - LinkPred::TestData< Network, EdgeContT >, [701](#)
- negRatio
  - LinkPred::Simp::Evaluator::Factory::ECLParams, [237](#)
- negStrmBegin
  - LinkPred::PredResults< TestDataT, LPredictorT, ScoresContainerT >, [620](#)
  - LinkPred::TestData< Network, EdgeContT >, [701](#)
- negStrmEnd
  - LinkPred::PredResults< TestDataT, LPredictorT, ScoresContainerT >, [620](#)
  - LinkPred::TestData< Network, EdgeContT >, [702](#)
- neighbBegin
  - LinkPred::DNetwork< LabelT, NodeIDT, EdgeT >, [204](#)
  - LinkPred::UNetwork< LabelT, NodeIDT, EdgeT >, [887](#)
- neighbEnd
  - LinkPred::DNetwork< LabelT, NodeIDT, EdgeT >, [204](#)
  - LinkPred::UNetwork< LabelT, NodeIDT, EdgeT >, [887](#)
- Network
  - LinkPred::DLPredictor< NetworkT, EdgeRndIt, ScoreRndIt, EdgeRndOutIt >, [176](#)
  - LinkPred::ULPredictor< NetworkT, EdgeRndIt, ScoreRndIt, EdgeRndOutIt >, [836](#)
- NetworkCache
  - LinkPred, [39](#)
- NetworkCSP
  - LinkPred::NetworkManipulator< Network >, [452](#)
  - LinkPred::TestData< Network, EdgeContT >, [695](#)
- NetworkManipulator
  - LinkPred::NetworkManipulator< Network >, [453](#)
- NetworkSP
  - LinkPred::ASPDistCalculator< Network, DistType, NbHopsType >, [62](#)
  - LinkPred::ASPDsimCalculator< Network, DsimType, NbHopsType >, [68](#)
  - LinkPred::DESPLDistCalculator< Network, DistType, NbHopsType >, [124](#)
  - LinkPred::Dijkstra< Network, DistType, NbHopsType >, [147](#)
  - LinkPred::ESPDistCalculator< Network, DistType, NbHopsType >, [265](#)
  - LinkPred::ESPdsimCalculator< Network, DsimType, NbHopsType >, [273](#)
  - LinkPred::ESPIndSimlCalculator< Network, DistType, NbHopsType >, [280](#)
  - LinkPred::ESPLDistCalculator< Network, DistType, NbHopsType >, [286](#)
  - LinkPred::ESPLSimlCalculator< Network, DistType, NbHopsType >, [295](#)
  - LinkPred::ESPSimlCalculator< Network, DistType, NbHopsType >, [305](#)
  - LinkPred::NetDistCalculator< Network, DistType, NbHopsType >, [434](#)
  - LinkPred::NetIndSimlCalculator< Network, DistType, NbHopsType >, [440](#)
  - LinkPred::NetSimlCalculator< Network, DistType, NbHopsType >, [445](#)
  - LinkPred::NetworkManipulator< Network >, [452](#)
  - LinkPred::TestData< Network, EdgeContT >, [695](#)
- NoCache
  - LinkPred, [39](#)
- Node2Vec
  - LinkPred::Node2Vec< Network >, [466](#), [467](#)
- NodeCache
  - LinkPred, [39](#)
- NodeDegIt
  - LinkPred::DNetwork< LabelT, NodeIDT, EdgeT >::NodeDegIt, [476](#)
  - LinkPred::UNetwork< LabelT, NodeIDT, EdgeT >::NodeDegIt, [486](#)
- NodeDistMap
  - LinkPred::ASPDistCalculator< Network, DistType, NbHopsType >, [62](#)
  - LinkPred::DESPLDistCalculator< Network, DistType, NbHopsType >, [124](#)
  - LinkPred::Dijkstra< Network, DistType, NbHopsType >, [147](#)
  - LinkPred::ESPDistCalculator< Network, DistType, NbHopsType >, [265](#)
  - LinkPred::ESPIndSimlCalculator< Network, DistType, NbHopsType >, [280](#)
  - LinkPred::ESPLDistCalculator< Network, DistType, NbHopsType >, [286](#)
  - LinkPred::ESPSimlCalculator< Network, DistType, NbHopsType >, [305](#)
  - LinkPred::NetDistCalculator< Network, DistType,



- NbHopsType >, [434](#)
- NodeDistMapSP
  - LinkPred::ASPDistCalculator< Network, DistType, NbHopsType >, [62](#)
  - LinkPred::DESPLDistCalculator< Network, DistType, NbHopsType >, [124](#)
  - LinkPred::Dijkstra< Network, DistType, NbHopsType >, [147](#)
  - LinkPred::ESPDistCalculator< Network, DistType, NbHopsType >, [265](#)
  - LinkPred::ESPIndSimlCalculator< Network, DistType, NbHopsType >, [280](#)
  - LinkPred::ESPLDistCalculator< Network, DistType, NbHopsType >, [287](#)
  - LinkPred::ESPSimlCalculator< Network, DistType, NbHopsType >, [305](#)
  - LinkPred::NetDistCalculator< Network, DistType, NbHopsType >, [435](#)
- NodeDsimMap
  - LinkPred::ASPDsimCalculator< Network, DsimType, NbHopsType >, [68](#)
  - LinkPred::ESPDsimCalculator< Network, DsimType, NbHopsType >, [273](#)
- NodeDsimMapSP
  - LinkPred::ASPDsimCalculator< Network, DsimType, NbHopsType >, [69](#)
  - LinkPred::ESPDsimCalculator< Network, DsimType, NbHopsType >, [273](#)
- NodeID
  - LinkPred::ASPDistCalculator< Network, DistType, NbHopsType >, [62](#)
  - LinkPred::ASPDsimCalculator< Network, DsimType, NbHopsType >, [69](#)
  - LinkPred::DESPLDistCalculator< Network, DistType, NbHopsType >, [125](#)
  - LinkPred::Dijkstra< Network, DistType, NbHopsType >, [148](#)
  - LinkPred::DLPredictor< NetworkT, EdgeRndItT, ScoreRndItT, EdgeRndOutItT >, [176](#)
  - LinkPred::DNetwork< LabelT, NodeIDT, EdgeT >, [186](#)
  - LinkPred::Encoder< Network >, [255](#)
  - LinkPred::ESPDistCalculator< Network, DistType, NbHopsType >, [265](#)
  - LinkPred::ESPDsimCalculator< Network, DsimType, NbHopsType >, [273](#)
  - LinkPred::ESPIndSimlCalculator< Network, DistType, NbHopsType >, [280](#)
  - LinkPred::ESPLDistCalculator< Network, DistType, NbHopsType >, [287](#)
  - LinkPred::ESPLSimlCalculator< Network, DistType, NbHopsType >, [296](#)
  - LinkPred::ESPSimlCalculator< Network, DistType, NbHopsType >, [305](#)
  - LinkPred::NetDistCalculator< Network, DistType, NbHopsType >, [435](#)
  - LinkPred::NetIndSimlCalculator< Network, DistType, NbHopsType >, [440](#)
  - LinkPred::NetSimlCalculator< Network, DistType, NbHopsType >, [445](#)
  - LinkPred::NetworkManipulator< Network >, [452](#)
  - LinkPred::UKABPredictor< Network, EdgeRndIt, ScoreRndIt, EdgeRndOutIt >, [818](#)
  - LinkPred::ULPredictor< NetworkT, EdgeRndItT, ScoreRndItT, EdgeRndOutItT >, [837](#)
  - LinkPred::UNEDPredictor< Network, EdgeRndIt, ScoreRndIt, EdgeRndOutIt >, [862](#)
  - LinkPred::UNetwork< LabelT, NodeIDT, EdgeT >, [870](#)
- NodeIt
  - LinkPred::DNetwork< LabelT, NodeIDT, EdgeT >, [186](#)
  - LinkPred::UNetwork< LabelT, NodeIDT, EdgeT >, [871](#)
- NodeMap
  - LinkPred::DNetwork< LabelT, NodeIDT, EdgeT >::NodeMap< ValueType >, [501](#)
  - LinkPred::NetworkManipulator< Network >, [453](#)
  - LinkPred::UNetwork< LabelT, NodeIDT, EdgeT >::NodeMap< ValueType >, [495](#), [496](#)
- NodeMapConstIt
  - LinkPred::DNetwork< LabelT, NodeIDT, EdgeT >::NodeMap< ValueType >, [500](#)
  - LinkPred::UNetwork< LabelT, NodeIDT, EdgeT >::NodeMap< ValueType >, [495](#)
- NodeMapIt
  - LinkPred::DNetwork< LabelT, NodeIDT, EdgeT >::NodeMap< ValueType >, [500](#)
  - LinkPred::UNetwork< LabelT, NodeIDT, EdgeT >::NodeMap< ValueType >, [495](#)
- NodeMapSP
  - LinkPred::DNetwork< LabelT, NodeIDT, EdgeT >, [186](#)
  - LinkPred::UNetwork< LabelT, NodeIDT, EdgeT >, [871](#)
- nodesBegin
  - LinkPred::DNetwork< LabelT, NodeIDT, EdgeT >, [204](#)
  - LinkPred::UNetwork< LabelT, NodeIDT, EdgeT >, [888](#)
- nodesDegBegin
  - LinkPred::DNetwork< LabelT, NodeIDT, EdgeT >, [205](#)
  - LinkPred::UNetwork< LabelT, NodeIDT, EdgeT >, [888](#)
- nodesDegEnd
  - LinkPred::DNetwork< LabelT, NodeIDT, EdgeT >, [205](#)
  - LinkPred::UNetwork< LabelT, NodeIDT, EdgeT >, [888](#)
- NodeSDistMap
  - LinkPred::DESPLDistCalculator< Network, DistType, NbHopsType >, [125](#)
  - LinkPred::ESPLDistCalculator< Network, DistType, NbHopsType >, [287](#)
  - LinkPred::ESPLSimlCalculator< Network, Dist-



- Type, NbHopsType >, [296](#)
- LinkPred::NetSimlCalculator< Network, DistType, NbHopsType >, [446](#)
- NodeSDistMapSP
  - LinkPred::DESPLDistCalculator< Network, DistType, NbHopsType >, [125](#)
  - LinkPred::Dijkstra< Network, DistType, NbHopsType >, [148](#)
  - LinkPred::ESPLDistCalculator< Network, DistType, NbHopsType >, [287](#)
  - LinkPred::ESPLSimlCalculator< Network, DistType, NbHopsType >, [296](#)
  - LinkPred::NetSimlCalculator< Network, DistType, NbHopsType >, [446](#)
- nodesEnd
  - LinkPred::DNetwork< LabelT, NodeIDT, EdgeT >, [205](#)
  - LinkPred::UNetwork< LabelT, NodeIDT, EdgeT >, [888](#)
- NodeSMap
  - LinkPred::DNetwork< LabelT, NodeIDT, EdgeT >::NodeSMap< ValueType >, [506](#)
  - LinkPred::UNetwork< LabelT, NodeIDT, EdgeT >::NodeSMap< ValueType >, [512](#)
- NodeSMapConstIterator
  - LinkPred::DNetwork< LabelT, NodeIDT, EdgeT >::NodeSMap< ValueType >, [506](#)
  - LinkPred::UNetwork< LabelT, NodeIDT, EdgeT >::NodeSMap< ValueType >, [511](#)
- NodeSMapIterator
  - LinkPred::DNetwork< LabelT, NodeIDT, EdgeT >::NodeSMap< ValueType >, [506](#)
  - LinkPred::UNetwork< LabelT, NodeIDT, EdgeT >::NodeSMap< ValueType >, [512](#)
- NodeSMapSP
  - LinkPred::DNetwork< LabelT, NodeIDT, EdgeT >, [187](#)
  - LinkPred::UNetwork< LabelT, NodeIDT, EdgeT >, [871](#)
- None
  - LinkPred, [40](#)
- NonEdgelt
  - LinkPred::DNetwork< LabelT, NodeIDT, EdgeT >::NonEdgelt, [528](#), [529](#)
  - LinkPred::TestData< Network, EdgeContT >, [695](#)
  - LinkPred::UNetwork< LabelT, NodeIDT, EdgeT >::NonEdgelt, [519](#)
- nonEdgesBegin
  - LinkPred::DNetwork< LabelT, NodeIDT, EdgeT >, [205](#)
  - LinkPred::UNetwork< LabelT, NodeIDT, EdgeT >, [889](#)
- nonEdgesEnd
  - LinkPred::DNetwork< LabelT, NodeIDT, EdgeT >, [205](#)
  - LinkPred::UNetwork< LabelT, NodeIDT, EdgeT >, [889](#)
- norm
  - LinkPred::Utils, [52](#)
  - LinkPred::Vec, [956](#)
- npv
  - perfmeasure.hpp, [1053](#)
- Numerical classes and algorithms, [26](#)
- operator!=
  - LinkPred::DNetwork< LabelT, NodeIDT, EdgeT >::NodeDeglt, [477](#)
  - LinkPred::DNetwork< LabelT, NodeIDT, EdgeT >::NonEdgelt, [529](#)
  - LinkPred::DNetwork< LabelT, NodeIDT, EdgeT >::RndEdgelt, [644](#)
  - LinkPred::DNetwork< LabelT, NodeIDT, EdgeT >::RndNodeIt, [649](#)
  - LinkPred::DNetwork< LabelT, NodeIDT, EdgeT >::RndNonEdgelt, [664](#)
  - LinkPred::GFMatrix, [338](#)
  - LinkPred::PredResults< TestDataT, LPredictorT, ScoresContainerT >::ScoreIterator, [682](#)
  - LinkPred::TestData< Network, EdgeContT >::TestEdgelt, [712](#)
  - LinkPred::TestEdgeGen< Network, EdgeContT >::TNEdgelt, [722](#)
  - LinkPred::TestEdgeGen< Network, EdgeContT >::TPEdgelt, [732](#)
  - LinkPred::UNetwork< LabelT, NodeIDT, EdgeT >::NodeDeglt, [486](#)
  - LinkPred::UNetwork< LabelT, NodeIDT, EdgeT >::NonEdgelt, [520](#)
  - LinkPred::UNetwork< LabelT, NodeIDT, EdgeT >::RndEdgelt, [639](#)
  - LinkPred::UNetwork< LabelT, NodeIDT, EdgeT >::RndNodeIt, [654](#)
  - LinkPred::UNetwork< LabelT, NodeIDT, EdgeT >::RndNonEdgelt, [659](#)
  - LinkPred::Vec, [957](#)
- operator<
  - LinkPred::DNetwork< LabelT, NodeIDT, EdgeT >::NodeDeglt, [481](#)
  - LinkPred::DNetwork< LabelT, NodeIDT, EdgeT >::NonEdgelt, [533](#)
  - LinkPred::PredResults< TestDataT, LPredictorT, ScoresContainerT >::ScoreIterator, [686](#)
  - LinkPred::TestData< Network, EdgeContT >::TestEdgelt, [716](#)
  - LinkPred::TestEdgeGen< Network, EdgeContT >::TNEdgelt, [726](#)
  - LinkPred::TestEdgeGen< Network, EdgeContT >::TPEdgelt, [735](#)
  - LinkPred::UNetwork< LabelT, NodeIDT, EdgeT >::NodeDeglt, [490](#)
  - LinkPred::UNetwork< LabelT, NodeIDT, EdgeT >::NonEdgelt, [523](#)
- operator<<
  - LinkPred::Log, [394](#)
- operator<=
  - LinkPred::DNetwork< LabelT, NodeIDT, EdgeT >::NodeDeglt, [481](#)

- LinkPred::DNetwork< LabelT, NodeIDT, EdgeT  
>::NonEdgelt, [533](#)
- LinkPred::PredResults< TestDataT, LPredictorT,  
ScoresContainerT >::ScoreIterator, [686](#)
- LinkPred::TestData< Network, EdgeContT  
>::TestEdgelt, [716](#)
- LinkPred::TestEdgeGen< Network, EdgeContT  
>::TNEdgelt, [726](#)
- LinkPred::TestEdgeGen< Network, EdgeContT  
>::TPEdgelt, [736](#)
- LinkPred::UNetwork< LabelT, NodeIDT, EdgeT  
>::NodeDeglt, [491](#)
- LinkPred::UNetwork< LabelT, NodeIDT, EdgeT  
>::NonEdgelt, [524](#)
- operator>
  - LinkPred::DNetwork< LabelT, NodeIDT, EdgeT  
>::NodeDeglt, [482](#)
  - LinkPred::DNetwork< LabelT, NodeIDT, EdgeT  
>::NonEdgelt, [535](#)
  - LinkPred::PredResults< TestDataT, LPredictorT,  
ScoresContainerT >::ScoreIterator, [688](#)
  - LinkPred::TestData< Network, EdgeContT  
>::TestEdgelt, [718](#)
  - LinkPred::TestEdgeGen< Network, EdgeContT  
>::TNEdgelt, [728](#)
  - LinkPred::TestEdgeGen< Network, EdgeContT  
>::TPEdgelt, [737](#)
  - LinkPred::UNetwork< LabelT, NodeIDT, EdgeT  
>::NodeDeglt, [493](#)
  - LinkPred::UNetwork< LabelT, NodeIDT, EdgeT  
>::NonEdgelt, [525](#)
- operator>=
  - LinkPred::DNetwork< LabelT, NodeIDT, EdgeT  
>::NodeDeglt, [483](#)
  - LinkPred::DNetwork< LabelT, NodeIDT, EdgeT  
>::NonEdgelt, [535](#)
  - LinkPred::PredResults< TestDataT, LPredictorT,  
ScoresContainerT >::ScoreIterator, [688](#)
  - LinkPred::TestData< Network, EdgeContT  
>::TestEdgelt, [718](#)
  - LinkPred::TestEdgeGen< Network, EdgeContT  
>::TNEdgelt, [728](#)
  - LinkPred::TestEdgeGen< Network, EdgeContT  
>::TPEdgelt, [737](#)
  - LinkPred::UNetwork< LabelT, NodeIDT, EdgeT  
>::NodeDeglt, [493](#)
  - LinkPred::UNetwork< LabelT, NodeIDT, EdgeT  
>::NonEdgelt, [525](#)
- operator\*
  - LinkPred, [40](#), [42](#)
  - LinkPred::DNetwork< LabelT, NodeIDT, EdgeT  
>::NodeDeglt, [477](#)
  - LinkPred::DNetwork< LabelT, NodeIDT, EdgeT  
>::NonEdgelt, [529](#)
  - LinkPred::DNetwork< LabelT, NodeIDT, EdgeT  
>::RndEdgelt, [644](#)
  - LinkPred::DNetwork< LabelT, NodeIDT, EdgeT  
>::RndNodeIt, [649](#)
- LinkPred::DNetwork< LabelT, NodeIDT, EdgeT  
>::RndNonEdgelt, [664](#)
- LinkPred::GFMatrix, [342](#), [343](#)
- LinkPred::PredResults< TestDataT, LPredictorT,  
ScoresContainerT >::ScoreIterator, [682](#)
- LinkPred::TestData< Network, EdgeContT  
>::TestEdgelt, [713](#)
- LinkPred::TestEdgeGen< Network, EdgeContT  
>::TNEdgelt, [722](#)
- LinkPred::TestEdgeGen< Network, EdgeContT  
>::TPEdgelt, [732](#)
- LinkPred::UNetwork< LabelT, NodeIDT, EdgeT  
>::NodeDeglt, [487](#)
- LinkPred::UNetwork< LabelT, NodeIDT, EdgeT  
>::NonEdgelt, [520](#)
- LinkPred::UNetwork< LabelT, NodeIDT, EdgeT  
>::RndEdgelt, [639](#)
- LinkPred::UNetwork< LabelT, NodeIDT, EdgeT  
>::RndNodeIt, [654](#)
- LinkPred::UNetwork< LabelT, NodeIDT, EdgeT  
>::RndNonEdgelt, [659](#)
- LinkPred::Vec, [963–965](#)
- operator^
  - LinkPred, [46](#)
  - LinkPred::Vec, [969](#)
- operator()
  - LinkPred::FastSig< T >, [323](#)
  - LinkPred::Utils::PairCompRight< FirstT, SecondT,  
CompareT >, [536](#)
- operator+
  - LinkPred, [42](#), [43](#)
  - LinkPred::DNetwork< LabelT, NodeIDT, EdgeT  
>::NodeDeglt, [477](#)
  - LinkPred::DNetwork< LabelT, NodeIDT, EdgeT  
>::NonEdgelt, [530](#)
  - LinkPred::GFMatrix, [344](#), [345](#)
  - LinkPred::PredResults< TestDataT, LPredictorT,  
ScoresContainerT >::ScoreIterator, [683](#)
  - LinkPred::TestData< Network, EdgeContT  
>::TestEdgelt, [713](#)
  - LinkPred::TestEdgeGen< Network, EdgeContT  
>::TNEdgelt, [723](#)
  - LinkPred::TestEdgeGen< Network, EdgeContT  
>::TPEdgelt, [732](#)
  - LinkPred::UNetwork< LabelT, NodeIDT, EdgeT  
>::NodeDeglt, [487](#)
  - LinkPred::UNetwork< LabelT, NodeIDT, EdgeT  
>::NonEdgelt, [520](#)
  - LinkPred::Vec, [965](#), [966](#)
- operator++
  - LinkPred::DNetwork< LabelT, NodeIDT, EdgeT  
>::NodeDeglt, [478](#)
  - LinkPred::DNetwork< LabelT, NodeIDT, EdgeT  
>::NonEdgelt, [530](#)
  - LinkPred::DNetwork< LabelT, NodeIDT, EdgeT  
>::RndEdgelt, [645](#)
  - LinkPred::DNetwork< LabelT, NodeIDT, EdgeT  
>::RndNodeIt, [649](#), [650](#)

- LinkPred::DNetwork< LabelT, NodeIDT, EdgeT  
>::RndNonEdgelt, [665](#)
- LinkPred::PredResults< TestDataT, LPredictorT,  
ScoresContainerT >::ScoreIterator, [683](#)
- LinkPred::TestData< Network, EdgeContT  
>::TestEdgelt, [713](#), [714](#)
- LinkPred::TestEdgeGen< Network, EdgeContT  
>::TNEdgelt, [723](#)
- LinkPred::TestEdgeGen< Network, EdgeContT  
>::TPEdgelt, [733](#)
- LinkPred::UNetwork< LabelT, NodeIDT, EdgeT  
>::NodeDeglt, [487](#), [488](#)
- LinkPred::UNetwork< LabelT, NodeIDT, EdgeT  
>::NonEdgelt, [521](#)
- LinkPred::UNetwork< LabelT, NodeIDT, EdgeT  
>::RndEdgelt, [640](#)
- LinkPred::UNetwork< LabelT, NodeIDT, EdgeT  
>::RndNodeIt, [654](#), [655](#)
- LinkPred::UNetwork< LabelT, NodeIDT, EdgeT  
>::RndNonEdgelt, [660](#)
- operator+=
  - LinkPred::DNetwork< LabelT, NodeIDT, EdgeT  
>::NodeDeglt, [478](#)
  - LinkPred::DNetwork< LabelT, NodeIDT, EdgeT  
>::NonEdgelt, [530](#)
  - LinkPred::PredResults< TestDataT, LPredictorT,  
ScoresContainerT >::ScoreIterator, [683](#)
  - LinkPred::TestData< Network, EdgeContT  
>::TestEdgelt, [714](#)
  - LinkPred::TestEdgeGen< Network, EdgeContT  
>::TNEdgelt, [723](#)
  - LinkPred::TestEdgeGen< Network, EdgeContT  
>::TPEdgelt, [733](#)
  - LinkPred::UNetwork< LabelT, NodeIDT, EdgeT  
>::NodeDeglt, [488](#)
  - LinkPred::UNetwork< LabelT, NodeIDT, EdgeT  
>::NonEdgelt, [521](#)
- operator-
  - LinkPred, [44](#)
  - LinkPred::DNetwork< LabelT, NodeIDT, EdgeT  
>::NodeDeglt, [479](#)
  - LinkPred::DNetwork< LabelT, NodeIDT, EdgeT  
>::NonEdgelt, [531](#)
  - LinkPred::GFMatrix, [345–347](#)
  - LinkPred::PredResults< TestDataT, LPredictorT,  
ScoresContainerT >::ScoreIterator, [684](#)
  - LinkPred::TestData< Network, EdgeContT  
>::TestEdgelt, [714](#), [715](#)
  - LinkPred::TestEdgeGen< Network, EdgeContT  
>::TNEdgelt, [724](#)
  - LinkPred::TestEdgeGen< Network, EdgeContT  
>::TPEdgelt, [734](#)
  - LinkPred::UNetwork< LabelT, NodeIDT, EdgeT  
>::NodeDeglt, [488](#), [489](#)
  - LinkPred::UNetwork< LabelT, NodeIDT, EdgeT  
>::NonEdgelt, [522](#)
  - LinkPred::Vec, [966](#), [967](#)
- operator->
  - LinkPred::DNetwork< LabelT, NodeIDT, EdgeT  
>::NodeDeglt, [480](#)
  - LinkPred::DNetwork< LabelT, NodeIDT, EdgeT  
>::NonEdgelt, [533](#)
  - LinkPred::DNetwork< LabelT, NodeIDT, EdgeT  
>::RndEdgelt, [645](#)
  - LinkPred::DNetwork< LabelT, NodeIDT, EdgeT  
>::RndNodeIt, [650](#)
  - LinkPred::DNetwork< LabelT, NodeIDT, EdgeT  
>::RndNonEdgelt, [665](#)
  - LinkPred::PredResults< TestDataT, LPredictorT,  
ScoresContainerT >::ScoreIterator, [686](#)
  - LinkPred::TestData< Network, EdgeContT  
>::TestEdgelt, [716](#)
  - LinkPred::TestEdgeGen< Network, EdgeContT  
>::TNEdgelt, [726](#)
  - LinkPred::TestEdgeGen< Network, EdgeContT  
>::TPEdgelt, [735](#)
  - LinkPred::UNetwork< LabelT, NodeIDT, EdgeT  
>::NodeDeglt, [490](#)
  - LinkPred::UNetwork< LabelT, NodeIDT, EdgeT  
>::NonEdgelt, [523](#)
  - LinkPred::UNetwork< LabelT, NodeIDT, EdgeT  
>::RndEdgelt, [640](#)
  - LinkPred::UNetwork< LabelT, NodeIDT, EdgeT  
>::RndNodeIt, [655](#)
  - LinkPred::UNetwork< LabelT, NodeIDT, EdgeT  
>::RndNonEdgelt, [660](#)
- operator--
  - LinkPred::DNetwork< LabelT, NodeIDT, EdgeT  
>::NodeDeglt, [479](#), [480](#)
  - LinkPred::DNetwork< LabelT, NodeIDT, EdgeT  
>::NonEdgelt, [532](#)
  - LinkPred::PredResults< TestDataT, LPredictorT,  
ScoresContainerT >::ScoreIterator, [685](#)
  - LinkPred::TestData< Network, EdgeContT  
>::TestEdgelt, [715](#)
  - LinkPred::TestEdgeGen< Network, EdgeContT  
>::TNEdgelt, [725](#)
  - LinkPred::TestEdgeGen< Network, EdgeContT  
>::TPEdgelt, [734](#), [735](#)
  - LinkPred::UNetwork< LabelT, NodeIDT, EdgeT  
>::NodeDeglt, [489](#)
  - LinkPred::UNetwork< LabelT, NodeIDT, EdgeT  
>::NonEdgelt, [522](#), [523](#)
- operator==
  - LinkPred::DNetwork< LabelT, NodeIDT, EdgeT  
>::NodeDeglt, [480](#)
  - LinkPred::DNetwork< LabelT, NodeIDT, EdgeT  
>::NonEdgelt, [532](#)
  - LinkPred::PredResults< TestDataT, LPredictorT,  
ScoresContainerT >::ScoreIterator, [685](#)
  - LinkPred::TestData< Network, EdgeContT  
>::TestEdgelt, [715](#)
  - LinkPred::TestEdgeGen< Network, EdgeContT  
>::TNEdgelt, [725](#)
  - LinkPred::TestEdgeGen< Network, EdgeContT  
>::TPEdgelt, [735](#)

- LinkPred::UNetwork< LabelT, NodeIDT, EdgeT  
>::NodeDegIt, [490](#)
- LinkPred::UNetwork< LabelT, NodeIDT, EdgeT  
>::NonEdgIt, [523](#)
- operator/
  - LinkPred, [45](#)
  - LinkPred::GFMatrix, [347](#)
  - LinkPred::Vec, [967](#), [968](#)
- operator=
  - LinkPred::ASPDistCalculator< Network, DistType,  
NbHopsType >, [65](#)
  - LinkPred::ASPDsimCalculator< Network, Dsim-  
Type, NbHopsType >, [71](#), [72](#)
  - LinkPred::BFS< Network, NodeProcessor >, [75](#)
  - LinkPred::BHeap< T, P, ComparatorT, Compar-  
atorP >, [80](#)
  - LinkPred::Bhmap< K, P, Comparator >, [87](#)
  - LinkPred::Classifier< InRndIt, OutRndIt, ScoreRn-  
dIt >, [91](#)
  - LinkPred::Collector< Network >, [94](#), [95](#)
  - LinkPred::CosineSim, [97](#), [98](#)
  - LinkPred::Counter< Network >, [100](#), [101](#)
  - LinkPred::DADAPredictor< Network, EdgeRndIt,  
ScoreRndIt, EdgeRndOutIt >, [105](#)
  - LinkPred::DCNEPredictor< Network, EdgeRndIt,  
ScoreRndIt, EdgeRndOutIt >, [110](#), [111](#)
  - LinkPred::DeepWalk< Network >, [118](#), [119](#)
  - LinkPred::DESPLDistCalculator< Network, Dist-  
Type, NbHopsType >, [129](#), [130](#)
  - LinkPred::DFS< Network, NodeProcessor >, [133](#)
  - LinkPred::DHDIPredictor< Network, EdgeRndIt,  
ScoreRndIt, EdgeRndOutIt >, [137](#)
  - LinkPred::DHPIPredictor< Network, EdgeRndIt,  
ScoreRndIt, EdgeRndOutIt >, [142](#), [143](#)
  - LinkPred::Dijkstra< Network, DistType, NbHop-  
sType >, [156](#), [157](#)
  - LinkPred::DJIDPredictor< Network, EdgeRndIt,  
ScoreRndIt, EdgeRndOutIt >, [161](#), [162](#)
  - LinkPred::DLCPredictor< Network, EdgeRndIt,  
ScoreRndIt, EdgeRndOutIt >, [167](#)
  - LinkPred::DLHNPredictor< Network, EdgeRndIt,  
ScoreRndIt, EdgeRndOutIt >, [172](#)
  - LinkPred::DLPredictor< NetworkT, EdgeRndItT,  
ScoreRndItT, EdgeRndOutItT >, [179](#), [180](#)
  - LinkPred::DNetwork< LabelT, NodeIDT, EdgeT >,  
[206](#)
  - LinkPred::DNetwork< LabelT, NodeIDT, EdgeT  
>::EdgeMap< ValueType >, [249](#)
  - LinkPred::DNetwork< LabelT, NodeIDT, EdgeT  
>::NodeDegIt, [481](#), [482](#)
  - LinkPred::DNetwork< LabelT, NodeIDT, EdgeT  
>::NodeMap< ValueType >, [503](#)
  - LinkPred::DNetwork< LabelT, NodeIDT, EdgeT  
>::NodeSMap< ValueType >, [509](#)
  - LinkPred::DNetwork< LabelT, NodeIDT, EdgeT  
>::NonEdgIt, [534](#)
  - LinkPred::DNetwork< LabelT, NodeIDT, EdgeT  
>::RndEdgIt, [645](#), [646](#)
  - LinkPred::DNetwork< LabelT, NodeIDT, EdgeT  
>::RndNodeIt, [650](#), [651](#)
  - LinkPred::DNetwork< LabelT, NodeIDT, EdgeT  
>::RndNonEdgIt, [665](#), [666](#)
  - LinkPred::DotProd, [214](#), [215](#)
  - LinkPred::DPATPredictor< Network, EdgeRndIt,  
ScoreRndIt, EdgeRndOutIt >, [219](#)
  - LinkPred::DPSTPredictor< Network, EdgeRndIt,  
ScoreRndIt, EdgeRndOutIt >, [224](#)
  - LinkPred::DSAPredictor< Network, EdgeRndIt,  
ScoreRndIt, EdgeRndOutIt >, [229](#)
  - LinkPred::DSOIPredictor< Network, EdgeRndIt,  
ScoreRndIt, EdgeRndOutIt >, [234](#), [235](#)
  - LinkPred::Encoder< Network >, [259](#), [260](#)
  - LinkPred::ESPDistCalculator< Network, DistType,  
NbHopsType >, [269](#), [270](#)
  - LinkPred::ESPDsimCalculator< Network, Dsim-  
Type, NbHopsType >, [277](#)
  - LinkPred::ESPIndSimlCalculator< Network, Dist-  
Type, NbHopsType >, [283](#)
  - LinkPred::ESPLDistCalculator< Network, Dist-  
Type, NbHopsType >, [292](#)
  - LinkPred::ESPLSimlCalculator< Network, Dist-  
Type, NbHopsType >, [301](#)
  - LinkPred::ESPSimlCalculator< Network, DistType,  
NbHopsType >, [309](#)
  - LinkPred::FastSig< T >, [323](#)
  - LinkPred::GCurve< PredResultsT >, [331](#), [332](#)
  - LinkPred::GFMatrix, [338](#), [339](#)
  - LinkPred::GraphTraversal< Network, NodeProces-  
sor >, [350](#)
  - LinkPred::HMSM< Network >, [355](#), [356](#)
  - LinkPred::L1Sim, [363](#)
  - LinkPred::L2Sim, [366](#)
  - LinkPred::LargeVis< Network >, [372](#)
  - LinkPred::LINE< Network >, [382](#)
  - LinkPred::LMapQueue< K, P, KComparator,  
PComparator >, [390](#), [391](#)
  - LinkPred::LogisticRegressor< InRndIt, OutRndIt,  
ScoreRndIt >, [399](#), [400](#)
  - LinkPred::LogMDSCG, [405](#), [406](#)
  - LinkPred::LogRegCG< InRndIt, OutRndIt >, [411](#),  
[412](#)
  - LinkPred::LPSim, [415](#)
  - LinkPred::MatFact< Network >, [420](#), [421](#)
  - LinkPred::MatFactCG, [427](#)
  - LinkPred::Node2Vec< Network >, [470](#), [471](#)
  - LinkPred::Pearson, [539](#)
  - LinkPred::PerfCurve< PredResultsT >, [546](#), [547](#)
  - LinkPred::PerfEvalExp< Network, TestDataT,  
LPredictorT, PredResultsT, PerfMeasureT  
>, [552](#), [553](#)
  - LinkPred::PerfEvaluator< TestDataT, LPredictorT,  
PredResultsT, PerfMeasureT >, [560](#), [561](#)
  - LinkPred::PerfMeasure< PredResultsT >, [566](#)
  - LinkPred::PR< PredResultsT >, [577](#)
  - LinkPred::PredResults< TestDataT, LPredictorT,  
ScoresContainerT >, [620](#), [622](#)

- LinkPred::PredResults< TestDataT, LPredictorT, ScoresContainerT >::ScoreIterator, [687](#)
- LinkPred::RandomGen, [631](#)
- LinkPred::RndClassifier< InRndIt, OutRndIt, ScoreRndIt >, [635](#), [636](#)
- LinkPred::ROC< PredResultsT >, [675](#), [676](#)
- LinkPred::SimMeasure, [691](#), [692](#)
- LinkPred::TestData< Network, EdgeContT >, [702](#)
- LinkPred::TestData< Network, EdgeContT >::TestEdgIt, [717](#)
- LinkPred::TestEdgeGen< Network, EdgeContT >, [707](#)
- LinkPred::TestEdgeGen< Network, EdgeContT >::TNEdgIt, [727](#)
- LinkPred::TestEdgeGen< Network, EdgeContT >::TPEdgIt, [736](#)
- LinkPred::TPR< PredResultsT >, [744](#)
- LinkPred::UADAPredictor< Network, EdgeRndIt, ScoreRndIt, EdgeRndOutIt >, [748](#), [749](#)
- LinkPred::UCNEPredictor< Network, EdgeRndIt, ScoreRndIt, EdgeRndOutIt >, [754](#)
- LinkPred::UCRAPredictor< Network, EdgeRndIt, ScoreRndIt, EdgeRndOutIt >, [759](#), [760](#)
- LinkPred::UCSTPredictor< Network, EdgeRndIt, ScoreRndIt, EdgeRndOutIt >, [766](#)
- LinkPred::UECLPredictor< Network, EdgeRndIt, ScoreRndIt, EdgeRndOutIt >, [772](#), [773](#)
- LinkPred::UESMPredictor< Network, EdgeRndIt, ScoreRndIt, EdgeRndOutIt >, [779](#)
- LinkPred::UFBMPredictor< Network, EdgeRndIt, ScoreRndIt, EdgeRndOutIt >, [784](#), [785](#)
- LinkPred::UHDIPredictor< Network, EdgeRndIt, ScoreRndIt, EdgeRndOutIt >, [789](#), [790](#)
- LinkPred::UHIPredictor< Network, EdgeRndIt, ScoreRndIt, EdgeRndOutIt >, [795](#)
- LinkPred::UHRGPredictor< Network, EdgeRndIt, ScoreRndIt, EdgeRndOutIt >, [801](#)
- LinkPred::UHYPYPredictor< Network, EdgeRndIt, ScoreRndIt, EdgeRndOutIt >, [808](#)
- LinkPred::UJIDPredictor< Network, EdgeRndIt, ScoreRndIt, EdgeRndOutIt >, [814](#), [815](#)
- LinkPred::UKABPredictor< Network, EdgeRndIt, ScoreRndIt, EdgeRndOutIt >, [821](#)
- LinkPred::ULCPPredictor< Network, EdgeRndIt, ScoreRndIt, EdgeRndOutIt >, [827](#), [828](#)
- LinkPred::ULHNPredictor< Network, EdgeRndIt, ScoreRndIt, EdgeRndOutIt >, [832](#), [833](#)
- LinkPred::ULPredictor< NetworkT, EdgeRndItT, ScoreRndItT, EdgeRndOutItT >, [840](#)
- LinkPred::UMPSPredictor< Network, EdgeRndIt, ScoreRndIt, EdgeRndOutIt >, [853](#)
- LinkPred::UNEDPredictor< Network, EdgeRndIt, ScoreRndIt, EdgeRndOutIt >, [864](#), [865](#)
- LinkPred::UNetwork< LabelT, NodeIDT, EdgeT >, [889](#), [890](#)
- LinkPred::UNetwork< LabelT, NodeIDT, EdgeT >::EdgeMap< ValueType >, [242](#), [243](#)
- LinkPred::UNetwork< LabelT, NodeIDT, EdgeT >::NodeDegIt, [491](#)
- LinkPred::UNetwork< LabelT, NodeIDT, EdgeT >::NodeMap< ValueType >, [498](#)
- LinkPred::UNetwork< LabelT, NodeIDT, EdgeT >::NodeSMap< ValueType >, [515](#)
- LinkPred::UNetwork< LabelT, NodeIDT, EdgeT >::NonEdgIt, [524](#)
- LinkPred::UNetwork< LabelT, NodeIDT, EdgeT >::RndEdgIt, [640](#), [641](#)
- LinkPred::UNetwork< LabelT, NodeIDT, EdgeT >::RndNodeIt, [655](#), [656](#)
- LinkPred::UNetwork< LabelT, NodeIDT, EdgeT >::RndNonEdgIt, [660](#), [661](#)
- LinkPred::UPATPredictor< Network, EdgeRndIt, ScoreRndIt, EdgeRndOutIt >, [898](#)
- LinkPred::UPSTPredictor< Network, EdgeRndIt, ScoreRndIt, EdgeRndOutIt >, [904](#)
- LinkPred::URALPredictor< Network, EdgeRndIt, ScoreRndIt, EdgeRndOutIt >, [908](#), [909](#)
- LinkPred::URNDPredictor< Network, EdgeRndIt, ScoreRndIt, EdgeRndOutIt >, [914](#)
- LinkPred::USAIPredictor< Network, EdgeRndIt, ScoreRndIt, EdgeRndOutIt >, [919](#), [920](#)
- LinkPred::USBMPredictor< Network, EdgeRndIt, ScoreRndIt, EdgeRndOutIt >, [925](#)
- LinkPred::USHPPredictor< Network, EdgeRndIt, ScoreRndIt, EdgeRndOutIt >, [932](#)
- LinkPred::USOIPredictor< Network, EdgeRndIt, ScoreRndIt, EdgeRndOutIt >, [938](#), [939](#)
- LinkPred::USUMPredictor< Network, EdgeRndIt, ScoreRndIt, EdgeRndOutIt >, [944](#)
- LinkPred::Vec, [957](#)
- operator==
  - LinkPred::DNetwork< LabelT, NodeIDT, EdgeT >::NodeDegIt, [482](#)
  - LinkPred::DNetwork< LabelT, NodeIDT, EdgeT >::NonEdgIt, [534](#)
  - LinkPred::DNetwork< LabelT, NodeIDT, EdgeT >::RndEdgIt, [646](#)
  - LinkPred::DNetwork< LabelT, NodeIDT, EdgeT >::RndNodeIt, [651](#)
  - LinkPred::DNetwork< LabelT, NodeIDT, EdgeT >::RndNonEdgIt, [666](#)
  - LinkPred::GFMatrix, [339](#)
  - LinkPred::PredResults< TestDataT, LPredictorT, ScoresContainerT >::ScoreIterator, [687](#)
  - LinkPred::TestData< Network, EdgeContT >::TestEdgIt, [717](#)
  - LinkPred::TestEdgeGen< Network, EdgeContT >::TNEdgIt, [727](#)
  - LinkPred::TestEdgeGen< Network, EdgeContT >::TPEdgIt, [737](#)
  - LinkPred::UNetwork< LabelT, NodeIDT, EdgeT >::NodeDegIt, [493](#)
  - LinkPred::UNetwork< LabelT, NodeIDT, EdgeT >::NonEdgIt, [525](#)
  - LinkPred::UNetwork< LabelT, NodeIDT, EdgeT >::RndEdgIt, [641](#)



- LinkPred::UNetwork< LabelT, NodeIDT, EdgeT  
>::RndNodeIt, [656](#)
- LinkPred::UNetwork< LabelT, NodeIDT, EdgeT  
>::RndNonEdgeIt, [661](#)
- LinkPred::Vec, [957](#)
- operator[]
  - LinkPred::DNetwork< LabelT, NodeIDT, EdgeT  
>::EdgeMap< ValueType >, [249](#), [250](#)
  - LinkPred::DNetwork< LabelT, NodeIDT, EdgeT  
>::NodeMap< ValueType >, [504](#)
  - LinkPred::DNetwork< LabelT, NodeIDT, EdgeT  
>::NodeSMap< ValueType >, [509](#), [510](#)
  - LinkPred::UNetwork< LabelT, NodeIDT, EdgeT  
>::EdgeMap< ValueType >, [243](#)
  - LinkPred::UNetwork< LabelT, NodeIDT, EdgeT  
>::NodeMap< ValueType >, [498](#), [499](#)
  - LinkPred::UNetwork< LabelT, NodeIDT, EdgeT  
>::NodeSMap< ValueType >, [515](#), [516](#)
  - LinkPred::Vec, [958](#)
- Opt
  - LinkPred::UMPSPredictor< Network, EdgeRndIt,  
ScoreRndIt, EdgeRndOutIt >, [846](#)
- out
  - LinkPred::Log, [395](#)
  - LinkPred::PerfEvalExpDescp< Network >, [548](#)
- outEdgesBegin
  - LinkPred::DNetwork< LabelT, NodeIDT, EdgeT >,  
[206](#)
- outEdgesEnd
  - LinkPred::DNetwork< LabelT, NodeIDT, EdgeT >,  
[207](#)
- outNeighborsBegin
  - LinkPred::DNetwork< LabelT, NodeIDT, EdgeT >,  
[207](#)
- outNeighborsEnd
  - LinkPred::DNetwork< LabelT, NodeIDT, EdgeT >,  
[207](#)
- p\_const\_iterator
  - LinkPred::Bhmap< K, P, Comparator >, [84](#)
- partScale
  - LinkPred::Vec, [959](#)
- PAT
  - LinkPred::UMPSPredictor< Network, EdgeRndIt,  
ScoreRndIt, EdgeRndOutIt >, [846](#)
- PathType
  - LinkPred::Dijkstra< Network, DistType, NbHop-  
sType >, [148](#)
- PathTypeSP
  - LinkPred::Dijkstra< Network, DistType, NbHop-  
sType >, [148](#)
- pbegin
  - LinkPred::Bhmap< K, P, Comparator >, [87](#)
- Pearson
  - LinkPred::Pearson, [538](#)
- pend
  - LinkPred::Bhmap< K, P, Comparator >, [87](#)
- PerfCurve
  - LinkPred::PerfCurve< PredResultsT >, [543](#), [544](#)
- PerfEvalExp
  - LinkPred::PerfEvalExp< Network, TestDataT,  
LPredictorT, PredResultsT, PerfMeasureT  
>, [550](#), [551](#)
- PerfEvaluator
  - LinkPred::PerfEvaluator< TestDataT, LPredictorT,  
PredResultsT, PerfMeasureT >, [556](#)
- PerfLambdaT
  - perfmeasure.hpp, [1051](#)
- PerfMeasure
  - LinkPred::PerfMeasure< PredResultsT >, [563](#),  
[564](#)
- perfmeasure.hpp
  - acc, [1051](#)
  - fdr, [1052](#)
  - fmr, [1052](#)
  - fnr, [1053](#)
  - fpr, [1053](#)
  - npv, [1053](#)
  - PerfLambdaT, [1051](#)
  - pre, [1054](#)
  - rec, [1054](#)
  - tnr, [1055](#)
- Performance evaluation classes, [27](#)
- PerfResults
  - LinkPred, [38](#)
- pfind
  - LinkPred::Bhmap< K, P, Comparator >, [88](#)
- plFit
  - LinkPred::Utils, [52](#)
- pointer
  - LinkPred::DNetwork< LabelT, NodeIDT, EdgeT  
>::NodeDegIt, [476](#)
  - LinkPred::DNetwork< LabelT, NodeIDT, EdgeT  
>::NonEdgeIt, [528](#)
  - LinkPred::DNetwork< LabelT, NodeIDT, EdgeT  
>::RndEdgeIt, [643](#)
  - LinkPred::DNetwork< LabelT, NodeIDT, EdgeT  
>::RndNodeIt, [648](#)
  - LinkPred::DNetwork< LabelT, NodeIDT, EdgeT  
>::RndNonEdgeIt, [663](#)
  - LinkPred::PredResults< TestDataT, LPredictorT,  
ScoresContainerT >::ScoreIterator, [679](#)
  - LinkPred::TestData< Network, EdgeContT  
>::TestEdgeIt, [711](#)
  - LinkPred::TestEdgeGen< Network, EdgeContT  
>::TNEdgeIt, [721](#)
  - LinkPred::TestEdgeGen< Network, EdgeContT  
>::TPEdgeIt, [730](#)
  - LinkPred::UNetwork< LabelT, NodeIDT, EdgeT  
>::NodeDegIt, [485](#)
  - LinkPred::UNetwork< LabelT, NodeIDT, EdgeT  
>::NonEdgeIt, [518](#)
  - LinkPred::UNetwork< LabelT, NodeIDT, EdgeT  
>::RndEdgeIt, [638](#)
  - LinkPred::UNetwork< LabelT, NodeIDT, EdgeT  
>::RndNodeIt, [653](#)
  - LinkPred::UNetwork< LabelT, NodeIDT, EdgeT

- [>::RndNonEdgeIt](#), [658](#)
- pop
  - [LinkPred::BHeap< T, P, ComparatorT, ComparatorP >](#), [80](#)
  - [LinkPred::LMapQueue< K, P, KComparator, PComparator >](#), [391](#)
- pos
  - [LinkPred::Bhmap< K, P, Comparator >](#), [88](#)
- posBegin
  - [LinkPred::PredResults< TestDataT, LPredictorT, ScoresContainerT >](#), [622](#)
  - [LinkPred::TestData< Network, EdgeContT >](#), [703](#)
- posEnd
  - [LinkPred::PredResults< TestDataT, LPredictorT, ScoresContainerT >](#), [622](#)
  - [LinkPred::TestData< Network, EdgeContT >](#), [703](#)
- posRatio
  - [LinkPred::Simp::Evaluator::Factory::ECLParams](#), [238](#)
- posStrmBegin
  - [LinkPred::PredResults< TestDataT, LPredictorT, ScoresContainerT >](#), [622](#)
  - [LinkPred::TestData< Network, EdgeContT >](#), [703](#)
- posStrmEnd
  - [LinkPred::PredResults< TestDataT, LPredictorT, ScoresContainerT >](#), [623](#)
  - [LinkPred::TestData< Network, EdgeContT >](#), [703](#)
- PR
  - [LinkPred::PR< PredResultsT >](#), [571](#), [572](#)
- pre
  - [perfmeasure.hpp](#), [1054](#)
- predADA
  - [LinkPred::Simp::Predictor](#), [583](#)
- predAllADA
  - [LinkPred::Simp::Predictor](#), [583](#)
- predAllADAByID
  - [LinkPred::Simp::Predictor](#), [583](#)
- predAllCNE
  - [LinkPred::Simp::Predictor](#), [584](#)
- predAllCNEByID
  - [LinkPred::Simp::Predictor](#), [584](#)
- predAllCRA
  - [LinkPred::Simp::Predictor](#), [584](#)
- predAllCRABByID
  - [LinkPred::Simp::Predictor](#), [584](#)
- predAllECL
  - [LinkPred::Simp::Predictor](#), [585](#)
- predAllECLByID
  - [LinkPred::Simp::Predictor](#), [585](#)
- predAllESM
  - [LinkPred::Simp::Predictor](#), [586](#)
- predAllESMByID
  - [LinkPred::Simp::Predictor](#), [586](#)
- predAllFBM
  - [LinkPred::Simp::Predictor](#), [587](#)
- predAllFBMByID
  - [LinkPred::Simp::Predictor](#), [587](#)
- predAllHDI
  - [LinkPred::Simp::Predictor](#), [589](#)
- predAllHDIByID
  - [LinkPred::Simp::Predictor](#), [589](#)
- predAllHPI
  - [LinkPred::Simp::Predictor](#), [589](#)
- predAllHPIByID
  - [LinkPred::Simp::Predictor](#), [589](#)
- predAllHRG
  - [LinkPred::Simp::Predictor](#), [590](#)
- predAllHRGBByID
  - [LinkPred::Simp::Predictor](#), [590](#)
- predAllHYP
  - [LinkPred::Simp::Predictor](#), [591](#)
- predAllHYPByID
  - [LinkPred::Simp::Predictor](#), [591](#)
- predAllJID
  - [LinkPred::Simp::Predictor](#), [592](#)
- predAllJIDByID
  - [LinkPred::Simp::Predictor](#), [592](#)
- predAllKAB
  - [LinkPred::Simp::Predictor](#), [592](#)
- predAllKABByID
  - [LinkPred::Simp::Predictor](#), [592](#)
- predAllLCP
  - [LinkPred::Simp::Predictor](#), [593](#)
- predAllLCPByID
  - [LinkPred::Simp::Predictor](#), [593](#)
- predAllLHN
  - [LinkPred::Simp::Predictor](#), [594](#)
- predAllLHNByID
  - [LinkPred::Simp::Predictor](#), [594](#)
- predAllPAT
  - [LinkPred::Simp::Predictor](#), [594](#)
- predAllPATByID
  - [LinkPred::Simp::Predictor](#), [594](#)
- predAllRAL
  - [LinkPred::Simp::Predictor](#), [594](#)
- predAllRALByID
  - [LinkPred::Simp::Predictor](#), [595](#)
- predAllRND
  - [LinkPred::Simp::Predictor](#), [595](#)
- predAllRNDByID
  - [LinkPred::Simp::Predictor](#), [595](#)
- predAllSAI
  - [LinkPred::Simp::Predictor](#), [596](#)
- predAllSAIByID
  - [LinkPred::Simp::Predictor](#), [596](#)
- predAllSBM
  - [LinkPred::Simp::Predictor](#), [596](#)
- predAllSBMByID
  - [LinkPred::Simp::Predictor](#), [597](#)
- predAllSHP
  - [LinkPred::Simp::Predictor](#), [597](#)
- predAllSHPByID
  - [LinkPred::Simp::Predictor](#), [597](#)
- predAllSOI
  - [LinkPred::Simp::Predictor](#), [598](#)
- predAllSOIByID
  - [LinkPred::Simp::Predictor](#), [598](#)

- LinkPred::Simp::Predictor, [598](#)
- predCNE
  - LinkPred::Simp::Predictor, [598](#)
- predCRA
  - LinkPred::Simp::Predictor, [598](#)
- predECL
  - LinkPred::Simp::Predictor, [599](#)
- predESM
  - LinkPred::Simp::Predictor, [599](#)
- predFBM
  - LinkPred::Simp::Predictor, [600](#)
- predHDI
  - LinkPred::Simp::Predictor, [600](#)
- predHPI
  - LinkPred::Simp::Predictor, [600](#)
- predHRG
  - LinkPred::Simp::Predictor, [601](#)
- predHYP
  - LinkPred::Simp::Predictor, [601](#)
- predict
  - LinkPred::Classifier< InRndIt, OutRndIt, ScoreRndIt >, [92](#)
  - LinkPred::DADAPredictor< Network, EdgeRndIt, ScoreRndIt, EdgeRndOutIt >, [105](#)
  - LinkPred::DCNEPredictor< Network, EdgeRndIt, ScoreRndIt, EdgeRndOutIt >, [111](#)
  - LinkPred::DHDIPredictor< Network, EdgeRndIt, ScoreRndIt, EdgeRndOutIt >, [138](#)
  - LinkPred::DHPIPredictor< Network, EdgeRndIt, ScoreRndIt, EdgeRndOutIt >, [143](#)
  - LinkPred::DJIDPredictor< Network, EdgeRndIt, ScoreRndIt, EdgeRndOutIt >, [162](#)
  - LinkPred::DLCPPredictor< Network, EdgeRndIt, ScoreRndIt, EdgeRndOutIt >, [168](#)
  - LinkPred::DLHNPredictor< Network, EdgeRndIt, ScoreRndIt, EdgeRndOutIt >, [173](#)
  - LinkPred::DLPredictor< NetworkT, EdgeRndItT, ScoreRndItT, EdgeRndOutItT >, [180](#)
  - LinkPred::DPATPredictor< Network, EdgeRndIt, ScoreRndIt, EdgeRndOutIt >, [219](#)
  - LinkPred::DSAPredictor< Network, EdgeRndIt, ScoreRndIt, EdgeRndOutIt >, [230](#)
  - LinkPred::DSOIPredictor< Network, EdgeRndIt, ScoreRndIt, EdgeRndOutIt >, [235](#)
  - LinkPred::LogisticRegresser< InRndIt, OutRndIt, ScoreRndIt >, [400](#)
  - LinkPred::RndClassifier< InRndIt, OutRndIt, ScoreRndIt >, [636](#)
  - LinkPred::UADAPredictor< Network, EdgeRndIt, ScoreRndIt, EdgeRndOutIt >, [749](#)
  - LinkPred::UCNEPredictor< Network, EdgeRndIt, ScoreRndIt, EdgeRndOutIt >, [754](#)
  - LinkPred::UCRAPredictor< Network, EdgeRndIt, ScoreRndIt, EdgeRndOutIt >, [760](#)
  - LinkPred::UCSTPredictor< Network, EdgeRndIt, ScoreRndIt, EdgeRndOutIt >, [766](#)
  - LinkPred::UFBMPredictor< Network, EdgeRndIt, ScoreRndIt, EdgeRndOutIt >, [785](#)
  - LinkPred::UHDIPredictor< Network, EdgeRndIt, ScoreRndIt, EdgeRndOutIt >, [790](#)
  - LinkPred::UHPIPredictor< Network, EdgeRndIt, ScoreRndIt, EdgeRndOutIt >, [795](#)
  - LinkPred::UHRGPredictor< Network, EdgeRndIt, ScoreRndIt, EdgeRndOutIt >, [801](#)
  - LinkPred::UHYPPredictor< Network, EdgeRndIt, ScoreRndIt, EdgeRndOutIt >, [808](#)
  - LinkPred::UJIDPredictor< Network, EdgeRndIt, ScoreRndIt, EdgeRndOutIt >, [815](#)
  - LinkPred::UKABPredictor< Network, EdgeRndIt, ScoreRndIt, EdgeRndOutIt >, [822](#)
  - LinkPred::ULCPPredictor< Network, EdgeRndIt, ScoreRndIt, EdgeRndOutIt >, [828](#)
  - LinkPred::ULHNPredictor< Network, EdgeRndIt, ScoreRndIt, EdgeRndOutIt >, [833](#)
  - LinkPred::ULPredictor< NetworkT, EdgeRndItT, ScoreRndItT, EdgeRndOutItT >, [841](#)
  - LinkPred::UMPSPredictor< Network, EdgeRndIt, ScoreRndIt, EdgeRndOutIt >, [853](#)
  - LinkPred::UNEDPredictor< Network, EdgeRndIt, ScoreRndIt, EdgeRndOutIt >, [865](#)
  - LinkPred::UPATPredictor< Network, EdgeRndIt, ScoreRndIt, EdgeRndOutIt >, [898](#)
  - LinkPred::URALPredictor< Network, EdgeRndIt, ScoreRndIt, EdgeRndOutIt >, [909](#)
  - LinkPred::URNDPredictor< Network, EdgeRndIt, ScoreRndIt, EdgeRndOutIt >, [914](#)
  - LinkPred::USAPredictor< Network, EdgeRndIt, ScoreRndIt, EdgeRndOutIt >, [920](#)
  - LinkPred::USBMPredictor< Network, EdgeRndIt, ScoreRndIt, EdgeRndOutIt >, [926](#)
  - LinkPred::USHPPredictor< Network, EdgeRndIt, ScoreRndIt, EdgeRndOutIt >, [933](#)
  - LinkPred::USOIPredictor< Network, EdgeRndIt, ScoreRndIt, EdgeRndOutIt >, [939](#)
  - LinkPred::USUMPredictor< Network, EdgeRndIt, ScoreRndIt, EdgeRndOutIt >, [944](#)
- predictNeg
  - LinkPred::DLPredictor< NetworkT, EdgeRndItT, ScoreRndItT, EdgeRndOutItT >, [180](#)
  - LinkPred::ULPredictor< NetworkT, EdgeRndItT, ScoreRndItT, EdgeRndOutItT >, [841](#)
- Predictor
  - LinkPred::Simp::Predictor, [580](#)
- predJID
  - LinkPred::Simp::Predictor, [602](#)
- predKAB
  - LinkPred::Simp::Predictor, [602](#)
- predLCP
  - LinkPred::Simp::Predictor, [602](#)
- predLHN
  - LinkPred::Simp::Predictor, [603](#)
- predPAT
  - LinkPred::Simp::Predictor, [603](#)
- predRAL
  - LinkPred::Simp::Predictor, [603](#)
- PredResults



- LinkPred::PredResults< TestDataT, LPredictorT, ScoresContainerT >, [615](#), [616](#)
- LinkPred::PredResults< TestDataT, LPredictorT, ScoresContainerT >::ScoreIterator, [688](#)
- predRND
  - LinkPred::Simp::Predictor, [603](#)
- predSAI
  - LinkPred::Simp::Predictor, [604](#)
- predSBM
  - LinkPred::Simp::Predictor, [604](#)
- predSHP
  - LinkPred::Simp::Predictor, [604](#)
- predSOI
  - LinkPred::Simp::Predictor, [605](#)
- predTopADA
  - LinkPred::Simp::Predictor, [605](#)
- predTopCNE
  - LinkPred::Simp::Predictor, [605](#)
- predTopCRA
  - LinkPred::Simp::Predictor, [606](#)
- predTopECL
  - LinkPred::Simp::Predictor, [606](#)
- predTopESM
  - LinkPred::Simp::Predictor, [607](#)
- predTopFBM
  - LinkPred::Simp::Predictor, [607](#)
- predTopHDI
  - LinkPred::Simp::Predictor, [608](#)
- predTopHPI
  - LinkPred::Simp::Predictor, [608](#)
- predTopHRG
  - LinkPred::Simp::Predictor, [608](#)
- predTopHYP
  - LinkPred::Simp::Predictor, [609](#)
- predTopJID
  - LinkPred::Simp::Predictor, [609](#)
- predTopKAB
  - LinkPred::Simp::Predictor, [610](#)
- predTopLCP
  - LinkPred::Simp::Predictor, [610](#)
- predTopLHN
  - LinkPred::Simp::Predictor, [611](#)
- predTopPAT
  - LinkPred::Simp::Predictor, [611](#)
- predTopRAL
  - LinkPred::Simp::Predictor, [611](#)
- predTopRND
  - LinkPred::Simp::Predictor, [612](#)
- predTopSAI
  - LinkPred::Simp::Predictor, [612](#)
- predTopSBM
  - LinkPred::Simp::Predictor, [612](#)
- predTopSHP
  - LinkPred::Simp::Predictor, [613](#)
- predTopSOI
  - LinkPred::Simp::Predictor, [613](#)
- print
  - LinkPred::BHeap< T, P, ComparatorT, ComparatorP >, [81](#)
  - LinkPred::DNetwork< LabelT, NodeIDT, EdgeT >, [208](#)
  - LinkPred::GFMatrix, [339](#)
  - LinkPred::UNetwork< LabelT, NodeIDT, EdgeT >, [890](#)
  - LinkPred::Utils, [53](#)
  - LinkPred::Vec, [959](#), [960](#)
- printEdges
  - LinkPred::DNetwork< LabelT, NodeIDT, EdgeT >, [208](#)
  - LinkPred::UNetwork< LabelT, NodeIDT, EdgeT >, [890](#)
  - LinkPred::Utils, [53](#), [54](#)
- printPQ
  - LinkPred::LMapQueue< K, P, KComparator, PComparator >, [392](#)
- process
  - LinkPred::Collector< Network >, [95](#)
  - LinkPred::Counter< Network >, [101](#)
- push
  - LinkPred::BHeap< T, P, ComparatorT, ComparatorP >, [81](#)
  - LinkPred::LMapQueue< K, P, KComparator, PComparator >, [392](#)
- RA1
  - LinkPred::UMPSPredictor< Network, EdgeRndIt, ScoreRndIt, EdgeRndOutIt >, [846](#)
- RA2
  - LinkPred::UMPSPredictor< Network, EdgeRndIt, ScoreRndIt, EdgeRndOutIt >, [846](#)
- Random
  - LinkPred::UMPSPredictor< Network, EdgeRndIt, ScoreRndIt, EdgeRndOutIt >, [847](#)
  - LinkPred::USHPPredictor< Network, EdgeRndIt, ScoreRndIt, EdgeRndOutIt >, [929](#)
- RandomGen
  - LinkPred::RandomGen, [627](#), [628](#)
- ratioEnd
  - LinkPred::PerfEvalExpDescp< Network >, [548](#)
- ratioStart
  - LinkPred::PerfEvalExpDescp< Network >, [548](#)
- ratioStep
  - LinkPred::PerfEvalExpDescp< Network >, [548](#)
- read
  - LinkPred::DNetwork< LabelT, NodeIDT, EdgeT >, [208](#)
  - LinkPred::UNetwork< LabelT, NodeIDT, EdgeT >, [890](#)
  - LinkPred::Vec, [960](#)
- readEdges
  - LinkPred::DNetwork< LabelT, NodeIDT, EdgeT >, [209](#)
  - LinkPred::UNetwork< LabelT, NodeIDT, EdgeT >, [891](#)
  - LinkPred::Utils, [54](#)
- readEdgeScores

- LinkPred::Utils, [54](#)
- rec
  - perfmeasure.hpp, [1054](#)
- reference
  - LinkPred::DNetwork< LabelT, NodeIDT, EdgeT >::NodeDeglt, [476](#)
  - LinkPred::DNetwork< LabelT, NodeIDT, EdgeT >::NonEdgelt, [528](#)
  - LinkPred::DNetwork< LabelT, NodeIDT, EdgeT >::RndEdgelt, [643](#)
  - LinkPred::DNetwork< LabelT, NodeIDT, EdgeT >::RndNodeIt, [648](#)
  - LinkPred::DNetwork< LabelT, NodeIDT, EdgeT >::RndNonEdgelt, [663](#)
  - LinkPred::PredResults< TestDataT, LPredictorT, ScoresContainerT >::ScoreIterator, [680](#)
  - LinkPred::TestData< Network, EdgeContT >::TestEdgelt, [711](#)
  - LinkPred::TestEdgeGen< Network, EdgeContT >::TNEdgelt, [721](#)
  - LinkPred::TestEdgeGen< Network, EdgeContT >::TPEdgelt, [731](#)
  - LinkPred::UNetwork< LabelT, NodeIDT, EdgeT >::NodeDeglt, [485](#)
  - LinkPred::UNetwork< LabelT, NodeIDT, EdgeT >::NonEdgelt, [519](#)
  - LinkPred::UNetwork< LabelT, NodeIDT, EdgeT >::RndEdgelt, [638](#)
  - LinkPred::UNetwork< LabelT, NodeIDT, EdgeT >::RndNodeIt, [653](#)
  - LinkPred::UNetwork< LabelT, NodeIDT, EdgeT >::RndNonEdgelt, [658](#)
- refNet
  - LinkPred::PerfEvalExpDescp< Network >, [549](#)
- registerLengthMap
  - LinkPred::Dijkstra< Network, DistType, NbHopsType >, [157](#)
- removeNaN
  - LinkPred::GFMatrix, [340](#)
- requiresNeg
  - LinkPred::PerfMeasure< PredResultsT >, [566](#)
  - LinkPred::TPR< PredResultsT >, [744](#)
- requiresPos
  - LinkPred::PerfMeasure< PredResultsT >, [567](#)
- requiresShuffling
  - LinkPred::PerfMeasure< PredResultsT >, [567](#)
  - LinkPred::TPR< PredResultsT >, [744](#)
- res
  - LinkPred::Simp::PerfRes, [568](#)
- reset
  - LinkPred::Vec, [960](#), [961](#)
- resetCount
  - LinkPred::Counter< Network >, [101](#)
- resize
  - LinkPred::Vec, [961](#)
- resultsBegin
  - LinkPred::PerfEvalExp< Network, TestDataT, LPredictorT, PredResultsT, PerfMeasureT >, [553](#)
- LinkPred::PerfEvaluator< TestDataT, LPredictorT, PredResultsT, PerfMeasureT >, [561](#)
- resultsEnd
  - LinkPred::PerfEvalExp< Network, TestDataT, LPredictorT, PredResultsT, PerfMeasureT >, [553](#)
  - LinkPred::PerfEvaluator< TestDataT, LPredictorT, PredResultsT, PerfMeasureT >, [561](#)
- reverseEdge
  - LinkPred::DNetwork< LabelT, NodeIDT, EdgeT >, [209](#)
  - LinkPred::UNetwork< LabelT, NodeIDT, EdgeT >, [891](#)
- RndClassifier
  - LinkPred::RndClassifier< InRndIt, OutRndIt, ScoreRndIt >, [633](#)
- rndConExtract
  - LinkPred::NetworkManipulator< Network >, [463](#)
- RndEdgelt
  - LinkPred::DNetwork< LabelT, NodeIDT, EdgeT >::RndEdgelt, [643](#), [644](#)
  - LinkPred::UNetwork< LabelT, NodeIDT, EdgeT >::RndEdgelt, [638](#), [639](#)
- rndEdgesBegin
  - LinkPred::DNetwork< LabelT, NodeIDT, EdgeT >, [209](#)
  - LinkPred::UNetwork< LabelT, NodeIDT, EdgeT >, [892](#)
- rndEdgesEnd
  - LinkPred::DNetwork< LabelT, NodeIDT, EdgeT >, [210](#)
  - LinkPred::UNetwork< LabelT, NodeIDT, EdgeT >, [892](#)
- rndExtract
  - LinkPred::NetworkManipulator< Network >, [463](#)
- RndNodeIt
  - LinkPred::DNetwork< LabelT, NodeIDT, EdgeT >::RndNodeIt, [648](#), [649](#)
  - LinkPred::UNetwork< LabelT, NodeIDT, EdgeT >::RndNodeIt, [653](#), [654](#)
- rndNodesBegin
  - LinkPred::DNetwork< LabelT, NodeIDT, EdgeT >, [210](#)
  - LinkPred::UNetwork< LabelT, NodeIDT, EdgeT >, [892](#)
- rndNodesEnd
  - LinkPred::DNetwork< LabelT, NodeIDT, EdgeT >, [210](#)
  - LinkPred::UNetwork< LabelT, NodeIDT, EdgeT >, [893](#)
- RndNonEdgelt
  - LinkPred::DNetwork< LabelT, NodeIDT, EdgeT >::RndNonEdgelt, [663](#), [664](#)
  - LinkPred::UNetwork< LabelT, NodeIDT, EdgeT >::RndNonEdgelt, [658](#), [659](#)
- rndNonEdgesBegin
  - LinkPred::DNetwork< LabelT, NodeIDT, EdgeT >, [210](#)

- 211
  - LinkPred::UNetwork< LabelT, NodeIDT, EdgeT >, 893
- rndNonEdgesEnd
  - LinkPred::DNetwork< LabelT, NodeIDT, EdgeT >, 211
  - LinkPred::UNetwork< LabelT, NodeIDT, EdgeT >, 893
- ROC
  - LinkPred::ROC< PredResultsT >, 669, 670
- rst
  - LinkPred::NetworkManipulator< Network >, 464
- rtrim
  - LinkPred::Utils, 55
- run
  - LinkPred::PerfEvalExp< Network, TestDataT, LPredictorT, PredResultsT, PerfMeasureT >, 554
  - LinkPred::Simp::Evaluator, 320
- runNoTiming
  - LinkPred::PerfEvalExp< Network, TestDataT, LPredictorT, PredResultsT, PerfMeasureT >, 554
- runTiming
  - LinkPred::PerfEvalExp< Network, TestDataT, LPredictorT, PredResultsT, PerfMeasureT >, 554
- scale
  - LinkPred::Vec, 961
- Scan
  - LinkPred::UMPSPredictor< Network, EdgeRndIt, ScoreRndIt, EdgeRndOutIt >, 846
- scatter
  - LinkPred::Vec, 962
- score
  - LinkPred::DADAPredictor< Network, EdgeRndIt, ScoreRndIt, EdgeRndOutIt >, 106
  - LinkPred::DCNEPredictor< Network, EdgeRndIt, ScoreRndIt, EdgeRndOutIt >, 111
  - LinkPred::DHDIPredictor< Network, EdgeRndIt, ScoreRndIt, EdgeRndOutIt >, 138
  - LinkPred::DHPIPredictor< Network, EdgeRndIt, ScoreRndIt, EdgeRndOutIt >, 144
  - LinkPred::DJIDPredictor< Network, EdgeRndIt, ScoreRndIt, EdgeRndOutIt >, 162
  - LinkPred::DLCPPredictor< Network, EdgeRndIt, ScoreRndIt, EdgeRndOutIt >, 168
  - LinkPred::DLHNPredictor< Network, EdgeRndIt, ScoreRndIt, EdgeRndOutIt >, 173
  - LinkPred::DLPredictor< NetworkT, EdgeRndItT, ScoreRndItT, EdgeRndOutItT >, 181
  - LinkPred::DPATPredictor< Network, EdgeRndIt, ScoreRndIt, EdgeRndOutIt >, 220
  - LinkPred::DPSTPredictor< Network, EdgeRndIt, ScoreRndIt, EdgeRndOutIt >, 225
  - LinkPred::DSAPredictor< Network, EdgeRndIt, ScoreRndIt, EdgeRndOutIt >, 230
  - LinkPred::DSOIPredictor< Network, EdgeRndIt, ScoreRndIt, EdgeRndOutIt >, 236
  - LinkPred::Simp::EdgeScore, 252
  - LinkPred::Simp::EdgeScoreByID, 253
  - LinkPred::UADAPredictor< Network, EdgeRndIt, ScoreRndIt, EdgeRndOutIt >, 749
  - LinkPred::UCNEPredictor< Network, EdgeRndIt, ScoreRndIt, EdgeRndOutIt >, 755
  - LinkPred::UCRAPredictor< Network, EdgeRndIt, ScoreRndIt, EdgeRndOutIt >, 760
  - LinkPred::UCSTPredictor< Network, EdgeRndIt, ScoreRndIt, EdgeRndOutIt >, 767
  - LinkPred::UECLPredictor< Network, EdgeRndIt, ScoreRndIt, EdgeRndOutIt >, 773
  - LinkPred::UESMPredictor< Network, EdgeRndIt, ScoreRndIt, EdgeRndOutIt >, 780
  - LinkPred::UFBMPredictor< Network, EdgeRndIt, ScoreRndIt, EdgeRndOutIt >, 785
  - LinkPred::UHDIPredictor< Network, EdgeRndIt, ScoreRndIt, EdgeRndOutIt >, 791
  - LinkPred::UHIPredictor< Network, EdgeRndIt, ScoreRndIt, EdgeRndOutIt >, 796
  - LinkPred::UHRGPredictor< Network, EdgeRndIt, ScoreRndIt, EdgeRndOutIt >, 802
  - LinkPred::UHYPYPredictor< Network, EdgeRndIt, ScoreRndIt, EdgeRndOutIt >, 809
  - LinkPred::UJIDPredictor< Network, EdgeRndIt, ScoreRndIt, EdgeRndOutIt >, 815
  - LinkPred::UKABPredictor< Network, EdgeRndIt, ScoreRndIt, EdgeRndOutIt >, 822
  - LinkPred::ULCPPredictor< Network, EdgeRndIt, ScoreRndIt, EdgeRndOutIt >, 828
  - LinkPred::ULHNPredictor< Network, EdgeRndIt, ScoreRndIt, EdgeRndOutIt >, 834
  - LinkPred::ULPredictor< NetworkT, EdgeRndItT, ScoreRndItT, EdgeRndOutItT >, 842
  - LinkPred::UMPSPredictor< Network, EdgeRndIt, ScoreRndIt, EdgeRndOutIt >, 854
  - LinkPred::UNEDPredictor< Network, EdgeRndIt, ScoreRndIt, EdgeRndOutIt >, 866
  - LinkPred::UPATPredictor< Network, EdgeRndIt, ScoreRndIt, EdgeRndOutIt >, 899
  - LinkPred::UPSTPredictor< Network, EdgeRndIt, ScoreRndIt, EdgeRndOutIt >, 904
  - LinkPred::URALPredictor< Network, EdgeRndIt, ScoreRndIt, EdgeRndOutIt >, 910
  - LinkPred::URNDPredictor< Network, EdgeRndIt, ScoreRndIt, EdgeRndOutIt >, 915
  - LinkPred::USAPredictor< Network, EdgeRndIt, ScoreRndIt, EdgeRndOutIt >, 921
  - LinkPred::USBMPredictor< Network, EdgeRndIt, ScoreRndIt, EdgeRndOutIt >, 926
  - LinkPred::USHPPredictor< Network, EdgeRndIt, ScoreRndIt, EdgeRndOutIt >, 933
  - LinkPred::USOIPredictor< Network, EdgeRndIt, ScoreRndIt, EdgeRndOutIt >, 939
  - LinkPred::USUMPredictor< Network, EdgeRndIt, ScoreRndIt, EdgeRndOutIt >, 945

- LinkPred::Utils::EdgeScore< Label >, 251
- ScoreIterator
  - LinkPred::PredResults< TestDataT, LPredictorT, ScoresContainerT >::ScoreIterator, 680, 682
- ScoreRndIt
  - LinkPred::DLPredictor< NetworkT, EdgeRndItT, ScoreRndItT, EdgeRndOutIt >, 176
  - LinkPred::ULPredictor< NetworkT, EdgeRndItT, ScoreRndItT, EdgeRndOutIt >, 837
- ScoresItT
  - LinkPred::GCurve< PredResultsT >, 326
  - LinkPred::PerfCurve< PredResultsT >, 543
  - LinkPred::PerfMeasure< PredResultsT >, 563
  - LinkPred::PR< PredResultsT >, 571
  - LinkPred::PredResults< TestDataT, LPredictorT, ScoresContainerT >, 615
  - LinkPred::ROC< PredResultsT >, 669
  - LinkPred::TPR< PredResultsT >, 740
- seed
  - LinkPred::PerfEvalExpDescp< Network >, 549
  - LinkPred::Sim::Evaluator::Factory::ECLParams, 238
  - LinkPred::Sim::Evaluator::Factory::ESMParams, 262
  - LinkPred::Sim::Evaluator::Factory::FBMParams, 324
  - LinkPred::Sim::Evaluator::Factory::HRGParams, 359
  - LinkPred::Sim::Evaluator::Factory::HYPPParams, 360
  - LinkPred::Sim::Evaluator::Factory::RNDParams, 667
  - LinkPred::Sim::Evaluator::Factory::SBMParams, 677
  - LinkPred::Sim::Evaluator::Factory::SHPPParams, 689
- selectRandom
  - LinkPred::Utils, 55
- selectRandomInPlace
  - LinkPred::Utils, 55
- selectTopK
  - LinkPred::Utils, 56
- set
  - LinkPred::BHeap< T, P, ComparatorT, ComparatorP >, 81
  - LinkPred::GFMatrix, 340
- setAlg
  - LinkPred::MDS, 431
- setAlpha
  - LinkPred::DeepWalk< Network >, 119
  - LinkPred::HMSM< Network >, 356
- setAsp
  - LinkPred::UMPSPredictor< Network, EdgeRndIt, ScoreRndIt, EdgeRndOutIt >, 854
  - LinkPred::USHPPredictor< Network, EdgeRndIt, ScoreRndIt, EdgeRndOutIt >, 934
- setCacheLevel
  - LinkPred::UKABPredictor< Network, EdgeRndIt, ScoreRndIt, EdgeRndOutIt >, 823
- LinkPred::UMPSPredictor< Network, EdgeRndIt, ScoreRndIt, EdgeRndOutIt >, 855
- LinkPred::USHPPredictor< Network, EdgeRndIt, ScoreRndIt, EdgeRndOutIt >, 934
- setClassifier
  - LinkPred::UECLPredictor< Network, EdgeRndIt, ScoreRndIt, EdgeRndOutIt >, 774
- setCol
  - LinkPred::GFMatrix, 340
- setConstant
  - LinkPred::Vec, 962
- setDiag
  - LinkPred::GFMatrix, 341
- setDim
  - LinkPred::Encoder< Network >, 260
- setDiscDist
  - LinkPred::NetDistCalculator< Network, DistType, NbHopsType >, 437
  - LinkPred::NetIndSimlCalculator< Network, DistType, NbHopsType >, 442
  - LinkPred::NetSimlCalculator< Network, DistType, NbHopsType >, 449
- setDiscNbHops
  - LinkPred::NetDistCalculator< Network, DistType, NbHopsType >, 438
  - LinkPred::NetIndSimlCalculator< Network, DistType, NbHopsType >, 442
  - LinkPred::NetSimlCalculator< Network, DistType, NbHopsType >, 449
- setEdgeLengthMethod
  - LinkPred::UMPSPredictor< Network, EdgeRndIt, ScoreRndIt, EdgeRndOutIt >, 855
- setEdgeScores
  - LinkPred::DPSTPredictor< Network, EdgeRndIt, ScoreRndIt, EdgeRndOutIt >, 225
  - LinkPred::UPSTPredictor< Network, EdgeRndIt, ScoreRndIt, EdgeRndOutIt >, 905
- setEnabledReconstruct
  - LinkPred::LINE< Network >, 382
- setEncoder
  - LinkPred::UECLPredictor< Network, EdgeRndIt, ScoreRndIt, EdgeRndOutIt >, 774
  - LinkPred::UESMPredictor< Network, EdgeRndIt, ScoreRndIt, EdgeRndOutIt >, 780
- setEps
  - LinkPred::HMSM< Network >, 356
- setEpsilon
  - LinkPred::ULCPPredictor< Network, EdgeRndIt, ScoreRndIt, EdgeRndOutIt >, 829
- setGamma
  - LinkPred::LargeVis< Network >, 374
  - LinkPred::UHYPYPredictor< Network, EdgeRndIt, ScoreRndIt, EdgeRndOutIt >, 809
- setHorizLim
  - LinkPred::UKABPredictor< Network, EdgeRndIt, ScoreRndIt, EdgeRndOutIt >, 823
- setHProb

- LinkPred::HMSM< Network >, [356](#)
- setInitLR
  - LinkPred::DeepWalk< Network >, [119](#)
  - LinkPred::LargeVis< Network >, [374](#)
  - LinkPred::Node2Vec< Network >, [471](#)
- setInitLr
  - LinkPred::LINE< Network >, [383](#)
- setInterpolMethod
  - LinkPred::PR< PredResultsT >, [578](#)
- setL
  - LinkPred::UHYPSPredictor< Network, EdgeRndIt, ScoreRndIt, EdgeRndOutIt >, [810](#)
- setLambda
  - LinkPred::LogisticRegressor< InRndIt, OutRndIt, ScoreRndIt >, [400](#)
  - LinkPred::LogRegCG< InRndIt, OutRndIt >, [412](#)
  - LinkPred::MatFact< Network >, [421](#)
  - LinkPred::NetIndSimlCalculator< Network, DistType, NbHopsType >, [443](#)
  - LinkPred::NetSimlCalculator< Network, DistType, NbHopsType >, [449](#)
  - LinkPred::UMPSPredictor< Network, EdgeRndIt, ScoreRndIt, EdgeRndOutIt >, [855](#)
- setLambdaMethod
  - LinkPred::UMPSPredictor< Network, EdgeRndIt, ScoreRndIt, EdgeRndOutIt >, [856](#)
- setLambdaNegEstRatio
  - LinkPred::UMPSPredictor< Network, EdgeRndIt, ScoreRndIt, EdgeRndOutIt >, [856](#)
- setLambdaPosEstRatio
  - LinkPred::UMPSPredictor< Network, EdgeRndIt, ScoreRndIt, EdgeRndOutIt >, [856](#)
- setLambdaStep
  - LinkPred::UMPSPredictor< Network, EdgeRndIt, ScoreRndIt, EdgeRndOutIt >, [858](#)
- setLandmarkRatio
  - LinkPred::UMPSPredictor< Network, EdgeRndIt, ScoreRndIt, EdgeRndOutIt >, [858](#)
  - LinkPred::USHPPredictor< Network, EdgeRndIt, ScoreRndIt, EdgeRndOutIt >, [934](#)
- setLandmarks
  - LinkPred::ASPDistCalculator< Network, DistType, NbHopsType >, [65](#)
  - LinkPred::ASPDsimCalculator< Network, DsimType, NbHopsType >, [72](#)
- setLandmarkStrategy
  - LinkPred::UMPSPredictor< Network, EdgeRndIt, ScoreRndIt, EdgeRndOutIt >, [858](#)
  - LinkPred::USHPPredictor< Network, EdgeRndIt, ScoreRndIt, EdgeRndOutIt >, [935](#)
- setM
  - LinkPred::UHYPSPredictor< Network, EdgeRndIt, ScoreRndIt, EdgeRndOutIt >, [810](#)
- setMaxIter
  - LinkPred::UFBMPredictor< Network, EdgeRndIt, ScoreRndIt, EdgeRndOutIt >, [786](#)
  - LinkPred::USBMPredictor< Network, EdgeRndIt, ScoreRndIt, EdgeRndOutIt >, [927](#)
- setMaxLambda
  - LinkPred::UMPSPredictor< Network, EdgeRndIt, ScoreRndIt, EdgeRndOutIt >, [859](#)
- setMaxNbNodesInCache
  - LinkPred::DESPLDistCalculator< Network, DistType, NbHopsType >, [130](#)
  - LinkPred::ESPLDistCalculator< Network, DistType, NbHopsType >, [292](#)
  - LinkPred::ESPLSimlCalculator< Network, DistType, NbHopsType >, [301](#)
  - LinkPred::ESPSimlCalculator< Network, DistType, NbHopsType >, [309](#)
- setMinLambda
  - LinkPred::UMPSPredictor< Network, EdgeRndIt, ScoreRndIt, EdgeRndOutIt >, [859](#)
- setName
  - LinkPred::Classifier< InRndIt, OutRndIt, ScoreRndIt >, [92](#)
  - LinkPred::DLPredictor< NetworkT, EdgeRndItT, ScoreRndItT, EdgeRndOutItT >, [181](#)
  - LinkPred::Encoder< Network >, [260](#)
  - LinkPred::GFMatrix, [341](#)
  - LinkPred::PerfMeasure< PredResultsT >, [567](#)
  - LinkPred::SimMeasure, [692](#)
  - LinkPred::ULPredictor< NetworkT, EdgeRndItT, ScoreRndItT, EdgeRndOutItT >, [842](#)
- setNbBeans
  - LinkPred::UHRGPredictor< Network, EdgeRndIt, ScoreRndIt, EdgeRndOutIt >, [802](#)
- setNbMdsRuns
  - LinkPred::HMSM< Network >, [357](#)
- setNbNegSamples
  - LinkPred::LargeVis< Network >, [374](#)
  - LinkPred::LINE< Network >, [383](#)
  - LinkPred::Node2Vec< Network >, [471](#)
- setNbNodeWalks
  - LinkPred::DeepWalk< Network >, [119](#)
- setNbRuns
  - LinkPred::MDS, [431](#)
- setNbSamples
  - LinkPred::LargeVis< Network >, [374](#), [375](#)
  - LinkPred::UHRGPredictor< Network, EdgeRndIt, ScoreRndIt, EdgeRndOutIt >, [802](#)
- setNbWalks
  - LinkPred::DeepWalk< Network >, [120](#)
  - LinkPred::Node2Vec< Network >, [471](#)
- setNegRatio
  - LinkPred::MatFact< Network >, [421](#)
  - LinkPred::UECLPredictor< Network, EdgeRndIt, ScoreRndIt, EdgeRndOutIt >, [774](#)
- setNegSamplingPower
  - LinkPred::LargeVis< Network >, [375](#)
  - LinkPred::LINE< Network >, [383](#)
- setNegScore
  - LinkPred::UMPSPredictor< Network, EdgeRndIt, ScoreRndIt, EdgeRndOutIt >, [859](#)
- setNegSize
  - LinkPred::LargeVis< Network >, [375](#)



- LinkPred::LINE< Network >, 383
- setNet
  - LinkPred::Dijkstra< Network, DistType, NbHopsType >, 157
- setOrder
  - LinkPred::LINE< Network >, 384
- setOutPrec
  - LinkPred::PerfEvalExp< Network, TestDataT, LPredictorT, PredResultsT, PerfMeasureT >, 554
- setP
  - LinkPred::LPSim, 415
  - LinkPred::Node2Vec< Network >, 472
- setPerfMeasure
  - LinkPred::UMPSPredictor< Network, EdgeRndIt, ScoreRndIt, EdgeRndOutIt >, 860
- setPosRatio
  - LinkPred::MatFact< Network >, 421
  - LinkPred::UECLPredictor< Network, EdgeRndIt, ScoreRndIt, EdgeRndOutIt >, 775
- setPosScore
  - LinkPred::UMPSPredictor< Network, EdgeRndIt, ScoreRndIt, EdgeRndOutIt >, 860
- setProb
  - LinkPred::HMSM< Network >, 357
- setQ
  - LinkPred::Node2Vec< Network >, 472
- setRow
  - LinkPred::GFMatrix, 341
- setSelfSiml
  - LinkPred::NetIndSimlCalculator< Network, DistType, NbHopsType >, 443
  - LinkPred::NetSimlCalculator< Network, DistType, NbHopsType >, 449
- setSimMeasure
  - LinkPred::UESMPredictor< Network, EdgeRndIt, ScoreRndIt, EdgeRndOutIt >, 780
- setStepInterval
  - LinkPred::DeepWalk< Network >, 120
  - LinkPred::Node2Vec< Network >, 472
- setStrmEnabled
  - LinkPred::ROC< PredResultsT >, 676
- setStrmNeg
  - LinkPred::ROC< PredResultsT >, 676
- setSubSample
  - LinkPred::Node2Vec< Network >, 473
- setT
  - LinkPred::UHYPYPredictor< Network, EdgeRndIt, ScoreRndIt, EdgeRndOutIt >, 810
- setTimingEnabled
  - LinkPred::PerfEvaluator< TestDataT, LPredictorT, PredResultsT, PerfMeasureT >, 562
- setTol
  - LinkPred::HMSM< Network >, 357
  - LinkPred::LogisticRegressor< InRndIt, OutRndIt, ScoreRndIt >, 401
  - LinkPred::MatFact< Network >, 422
  - LinkPred::MDS, 431
  - LinkPred::UMPSPredictor< Network, EdgeRndIt, ScoreRndIt, EdgeRndOutIt >, 860
- setUseHops
  - LinkPred::ESPLSimlCalculator< Network, DistType, NbHopsType >, 302
- setUseTopMethod
  - LinkPred::TPR< PredResultsT >, 745
- setWalkLength
  - LinkPred::DeepWalk< Network >, 120
  - LinkPred::Node2Vec< Network >, 473
- setWeightMap
  - LinkPred::DeepWalk< Network >, 121
  - LinkPred::Encoder< Network >, 260
  - LinkPred::HMSM< Network >, 358
  - LinkPred::MatFact< Network >, 422
  - LinkPred::Node2Vec< Network >, 473
- setWindowSize
  - LinkPred::DeepWalk< Network >, 121
  - LinkPred::Node2Vec< Network >, 473
- setZeta
  - LinkPred::UHYPYPredictor< Network, EdgeRndIt, ScoreRndIt, EdgeRndOutIt >, 811
- shuffle
  - LinkPred::DNetwork< LabelT, NodeIDT, EdgeT >, 211
  - LinkPred::UNetwork< LabelT, NodeIDT, EdgeT >, 893
  - LinkPred::Utils, 56
- sim
  - LinkPred::CosineSim, 98
  - LinkPred::DotProd, 215
  - LinkPred::L1Sim, 364
  - LinkPred::L2Sim, 367
  - LinkPred::LPSim, 416
  - LinkPred::Pearson, 539
  - LinkPred::SimMeasure, 692
- SimMeasure
  - LinkPred::SimMeasure, 690, 691
- simMeasureName
  - LinkPred::Simp::Evaluator::Factory::ESMPParams, 262
- Simplified interface, 30
- size
  - LinkPred::BHeap< T, P, ComparatorT, ComparatorP >, 82
  - LinkPred::Bhmap< K, P, Comparator >, 88
  - LinkPred::DNetwork< LabelT, NodeIDT, EdgeT >::EdgeMap< ValueType >, 250
  - LinkPred::DNetwork< LabelT, NodeIDT, EdgeT >::NodeSMap< ValueType >, 510
  - LinkPred::LMapQueue< K, P, KComparator, PComparator >, 393
  - LinkPred::UNetwork< LabelT, NodeIDT, EdgeT >::EdgeMap< ValueType >, 244
  - LinkPred::UNetwork< LabelT, NodeIDT, EdgeT >::NodeSMap< ValueType >, 516
  - LinkPred::Vec, 962
- solve

- LinkPred::MDS, [432](#)
- sort
  - LinkPred::Utils, [56](#)
- sortNeg
  - LinkPred::PredResults< TestDataT, LPredictorT, ScoresContainerT >, [623](#)
- SortOrder
  - LinkPred, [40](#)
- sortPos
  - LinkPred::PredResults< TestDataT, LPredictorT, ScoresContainerT >, [623](#)
- start
  - LinkPred::DNetwork< LabelT, NodeIDT, EdgeT >, [212](#)
  - LinkPred::UNetwork< LabelT, NodeIDT, EdgeT >, [894](#)
- sum
  - LinkPred::GFMatrix, [341](#)
  - LinkPred::Vec, [962](#)
- sumCols
  - LinkPred::GFMatrix, [342](#)
- sumRows
  - LinkPred::GFMatrix, [342](#)
- T
  - LinkPred::Simp::Evaluator::Factory::HYPPParams, [360](#)
- target
  - LinkPred::MatFactPbData, [428](#)
- TestData
  - LinkPred::TestData< Network, EdgeContT >, [696](#), [697](#)
  - LinkPred::TestData< Network, EdgeContT >::TestEdgelt, [719](#)
- TestEdgeGen
  - LinkPred::TestEdgeGen< Network, EdgeContT >, [705](#), [706](#)
  - LinkPred::TestEdgeGen< Network, EdgeContT >::TNEdgelt, [728](#)
  - LinkPred::TestEdgeGen< Network, EdgeContT >::TPEdgelt, [738](#)
- TestEdgelt
  - LinkPred::TestData< Network, EdgeContT >::TestEdgelt, [711](#), [712](#)
- timingEnabled
  - LinkPred::PerfeEvalExpDescp< Network >, [549](#)
- TN
  - LinkPred, [39](#)
- tnBegin
  - LinkPred::TestEdgeGen< Network, EdgeContT >, [708](#)
- TNEdgelt
  - LinkPred::TestEdgeGen< Network, EdgeContT >::TNEdgelt, [721](#), [722](#)
- TNEIT
  - LinkPred::TestData< Network, EdgeContT >, [696](#)
- tnEnd
  - LinkPred::TestEdgeGen< Network, EdgeContT >, [708](#)
- tnr
  - perfmeasure.hpp, [1055](#)
- tnRatio
  - LinkPred::PerfeEvalExpDescp< Network >, [549](#)
- top
  - LinkPred::BHeap< T, P, ComparatorT, ComparatorP >, [82](#)
  - LinkPred::DADAPredictor< Network, EdgeRndIt, ScoreRndIt, EdgeRndOutIt >, [106](#)
  - LinkPred::DCNEPredictor< Network, EdgeRndIt, ScoreRndIt, EdgeRndOutIt >, [112](#)
  - LinkPred::DHDIPredictor< Network, EdgeRndIt, ScoreRndIt, EdgeRndOutIt >, [139](#)
  - LinkPred::DHPIPredictor< Network, EdgeRndIt, ScoreRndIt, EdgeRndOutIt >, [144](#)
  - LinkPred::DJIDPredictor< Network, EdgeRndIt, ScoreRndIt, EdgeRndOutIt >, [163](#)
  - LinkPred::DLHNPredictor< Network, EdgeRndIt, ScoreRndIt, EdgeRndOutIt >, [174](#)
  - LinkPred::DLPredictor< NetworkT, EdgeRndItT, ScoreRndItT, EdgeRndOutItT >, [182](#)
  - LinkPred::DSAPredictor< Network, EdgeRndIt, ScoreRndIt, EdgeRndOutIt >, [231](#)
  - LinkPred::DSOIPredictor< Network, EdgeRndIt, ScoreRndIt, EdgeRndOutIt >, [236](#)
  - LinkPred::LMapQueue< K, P, KComparator, PComparator >, [393](#)
  - LinkPred::UADAPredictor< Network, EdgeRndIt, ScoreRndIt, EdgeRndOutIt >, [750](#)
  - LinkPred::UCNEPredictor< Network, EdgeRndIt, ScoreRndIt, EdgeRndOutIt >, [755](#)
  - LinkPred::UCRAPredictor< Network, EdgeRndIt, ScoreRndIt, EdgeRndOutIt >, [761](#)
  - LinkPred::UCSTPredictor< Network, EdgeRndIt, ScoreRndIt, EdgeRndOutIt >, [767](#)
  - LinkPred::UHDIPredictor< Network, EdgeRndIt, ScoreRndIt, EdgeRndOutIt >, [791](#)
  - LinkPred::UHPIPredictor< Network, EdgeRndIt, ScoreRndIt, EdgeRndOutIt >, [796](#)
  - LinkPred::UJIDPredictor< Network, EdgeRndIt, ScoreRndIt, EdgeRndOutIt >, [816](#)
  - LinkPred::UKABPredictor< Network, EdgeRndIt, ScoreRndIt, EdgeRndOutIt >, [823](#)
  - LinkPred::ULHNPredictor< Network, EdgeRndIt, ScoreRndIt, EdgeRndOutIt >, [834](#)
  - LinkPred::ULPredictor< NetworkT, EdgeRndItT, ScoreRndItT, EdgeRndOutItT >, [842](#)
  - LinkPred::UNEDPredictor< Network, EdgeRndIt, ScoreRndIt, EdgeRndOutIt >, [866](#)
  - LinkPred::UPATPredictor< Network, EdgeRndIt, ScoreRndIt, EdgeRndOutIt >, [899](#)
  - LinkPred::URALPredictor< Network, EdgeRndIt, ScoreRndIt, EdgeRndOutIt >, [910](#)
  - LinkPred::USAPredictor< Network, EdgeRndIt, ScoreRndIt, EdgeRndOutIt >, [921](#)
  - LinkPred::USOIPredictor< Network, EdgeRndIt, ScoreRndIt, EdgeRndOutIt >, [940](#)
  - LinkPred::USUMPredictor< Network, EdgeRndIt,

- ScoreRndIt, EdgeRndOutIt >, 945
- topBegin
  - LinkPred::PredResults< TestDataT, LPredictorT, ScoresContainerT >, 625
- topEdgesBegin
  - LinkPred::PredResults< TestDataT, LPredictorT, ScoresContainerT >, 625
- topEdgesEnd
  - LinkPred::PredResults< TestDataT, LPredictorT, ScoresContainerT >, 625
- topEnd
  - LinkPred::PredResults< TestDataT, LPredictorT, ScoresContainerT >, 625
- TP
  - LinkPred, 39
- tpBegin
  - LinkPred::TestEdgeGen< Network, EdgeContT >, 708
- TPEdgeIt
  - LinkPred::TestEdgeGen< Network, EdgeContT >::TPEdgeIt, 731
- TPEIT
  - LinkPred::TestData< Network, EdgeContT >, 696
- tpEnd
  - LinkPred::TestEdgeGen< Network, EdgeContT >, 708
- TPR
  - LinkPred::TPR< PredResultsT >, 740, 741
- traverse
  - LinkPred::BFS< Network, NodeProcessor >, 76
  - LinkPred::DFS< Network, NodeProcessor >, 133
  - LinkPred::GraphTraversal< Network, NodeProcessor >, 350
- trim
  - LinkPred::Utils, 57
- tryDecrease
  - LinkPred::BHeap< T, P, ComparatorT, ComparatorP >, 82
- tryIncrease
  - LinkPred::BHeap< T, P, ComparatorT, ComparatorP >, 82
- UADAPredictor
  - LinkPred::UADAPredictor< Network, EdgeRndIt, ScoreRndIt, EdgeRndOutIt >, 747
- UCNEPredictor
  - LinkPred::UCNEPredictor< Network, EdgeRndIt, ScoreRndIt, EdgeRndOutIt >, 752, 753
- UCRAPredictor
  - LinkPred::UCRAPredictor< Network, EdgeRndIt, ScoreRndIt, EdgeRndOutIt >, 758
- UCSTPredictor
  - LinkPred::UCSTPredictor< Network, EdgeRndIt, ScoreRndIt, EdgeRndOutIt >, 763, 765
- UECLPredictor
  - LinkPred::UECLPredictor< Network, EdgeRndIt, ScoreRndIt, EdgeRndOutIt >, 770
- UESMPredictor
  - LinkPred::UESMPredictor< Network, EdgeRndIt, ScoreRndIt, EdgeRndOutIt >, 777
- UFBMPredictor
  - LinkPred::UFBMPredictor< Network, EdgeRndIt, ScoreRndIt, EdgeRndOutIt >, 782, 783
- UHDIPredictor
  - LinkPred::UHDIPredictor< Network, EdgeRndIt, ScoreRndIt, EdgeRndOutIt >, 788
- UHPIPredictor
  - LinkPred::UHPIPredictor< Network, EdgeRndIt, ScoreRndIt, EdgeRndOutIt >, 793, 794
- UHRGPredictor
  - LinkPred::UHRGPredictor< Network, EdgeRndIt, ScoreRndIt, EdgeRndOutIt >, 799
- UHYPYPredictor
  - LinkPred::UHYPYPredictor< Network, EdgeRndIt, ScoreRndIt, EdgeRndOutIt >, 804, 805
- UJIDPredictor
  - LinkPred::UJIDPredictor< Network, EdgeRndIt, ScoreRndIt, EdgeRndOutIt >, 813
- UKABPredictor
  - LinkPred::UKABPredictor< Network, EdgeRndIt, ScoreRndIt, EdgeRndOutIt >, 819
- ULCPPredictor
  - LinkPred::ULCPPredictor< Network, EdgeRndIt, ScoreRndIt, EdgeRndOutIt >, 825, 826
- ULHNPredictor
  - LinkPred::ULHNPredictor< Network, EdgeRndIt, ScoreRndIt, EdgeRndOutIt >, 831
- ULPredictor
  - LinkPred::ULPredictor< NetworkT, EdgeRndItT, ScoreRndItT, EdgeRndOutItT >, 837, 838
- UMPSPredictor
  - LinkPred::UMPSPredictor< Network, EdgeRndIt, ScoreRndIt, EdgeRndOutIt >, 847
- UNEDPredictor
  - LinkPred::UNEDPredictor< Network, EdgeRndIt, ScoreRndIt, EdgeRndOutIt >, 863
- UNetwork
  - LinkPred::UNetwork< LabelT, NodeIDT, EdgeT >, 871, 872
  - LinkPred::UNetwork< LabelT, NodeIDT, EdgeT >::NodeDegIt, 494
  - LinkPred::UNetwork< LabelT, NodeIDT, EdgeT >::NonEdgeIt, 526
- unregisterLengthMap
  - LinkPred::Dijkstra< Network, DistType, NbHopsType >, 158
- UPATPredictor
  - LinkPred::UPATPredictor< Network, EdgeRndIt, ScoreRndIt, EdgeRndOutIt >, 896, 897
- UPSTPredictor
  - LinkPred::UPSTPredictor< Network, EdgeRndIt, ScoreRndIt, EdgeRndOutIt >, 902
- URALPredictor
  - LinkPred::URALPredictor< Network, EdgeRndIt, ScoreRndIt, EdgeRndOutIt >, 907
- URNDPredictor



- LinkPred::URNDPredictor< Network, EdgeRndIt, ScoreRndIt, EdgeRndOutIt >, [912](#), [913](#)
- USAIPredictor
  - LinkPred::USAIPredictor< Network, EdgeRndIt, ScoreRndIt, EdgeRndOutIt >, [918](#)
- USBMPredictor
  - LinkPred::USBMPredictor< Network, EdgeRndIt, ScoreRndIt, EdgeRndOutIt >, [923](#), [924](#)
- User
  - LinkPred::UMPSPredictor< Network, EdgeRndIt, ScoreRndIt, EdgeRndOutIt >, [846](#)
- USHPPredictor
  - LinkPred::USHPPredictor< Network, EdgeRndIt, ScoreRndIt, EdgeRndOutIt >, [929](#), [930](#)
- USOIPredictor
  - LinkPred::USOIPredictor< Network, EdgeRndIt, ScoreRndIt, EdgeRndOutIt >, [937](#)
- USUMPredictor
  - LinkPred::USUMPredictor< Network, EdgeRndIt, ScoreRndIt, EdgeRndOutIt >, [942](#), [943](#)
- Utility functions and classes, [31](#)
- Vec
  - LinkPred::Vec, [948–950](#)
- WeightMap
  - LinkPred::Encoder< Network >, [255](#)
- WeightMapSP
  - LinkPred::Encoder< Network >, [255](#)
- write
  - LinkPred::DNetwork< LabelT, NodeIDT, EdgeT >, [212](#)
  - LinkPred::UNetwork< LabelT, NodeIDT, EdgeT >, [894](#)
  - LinkPred::Vec, [963](#)
- writeEdgeScores
  - LinkPred::Utils, [57](#)
- zeta
  - LinkPred::Simp::Evaluator::Factory::HYPParams, [360](#)
